# Supplementary material
Source: Research Square preprint supplement (doi:10.21203/rs.3.rs-9956001/v1)
Supplement: Supplementary file 1 [file 09182979348f3bda042b7da7.xlsx]

## Sheet: S7 Columns Description
Supplementary Table S7: Column Description
Column Name	Description
Probe_ID	Identifier of the Illumina Infinium (EPICv2) methylation probe used in the Pearson correlation analysis.
Gene_Name	Gene symbol taken from Gencode version 47 gene annotation corresponding to the gene expression feature included in the Pearson correlation analysis.
Pearson_R	Pearson's correlation coefficient between DNA methylation and gene expression across samples.
P_value	P-value for the methylation–expression correlation analysis.

## Sheet: S7 PCorr Meth Probes + RNAseq
Supplementary Table S7: Correlation between DNA Methylation and Gene Expression
Probe_ID	Gene_Name	Pearson_R	P_value
cg14281592_TC21	ANGPTL2	-0.543533	0.0108758
cg05193613_BC21	ANGPTL2	-0.527049	0.0140888
cg13074114_BC21	KLHL38	-0.502634	0.0202194
cg07544232_TC21	LAMC2	-0.653295	0.00132166
cg02767663_BC21	LAMC2	-0.571698	0.00677782
cg23696949_TC21	LAMC2	-0.552556	0.00938774
cg01949993_BC11	LAMC2	-0.533422	0.0127662
cg12552165_BC21	LAMC2	-0.521877	0.015242
cg23070711_TC11	LAMC2	-0.474313	0.0298262
cg00696930_BC21	LAMC2	-0.463361	0.0343861
cg01460604_TC21	LRRC17	-0.627585	0.00232206
cg25156951_TC21	MYRIP	-0.494898	0.0225543
cg03000006_TC11	MYRIP	-0.456567	0.0374787
cg20176194_TC21	PTPRN	-0.678872	0.000715265
cg25516529_BC21	PTPRN	-0.659249	0.00115141
cg03545227_TC21	PTPRN	-0.651149	0.00138803
cg06971096_BC21	PTPRN	-0.462274	0.0348672
cg20671534_TC21	PTPRN	-0.44342	0.0440755
cg12473734_BC11	RAB40B	-0.511732	0.0177249
cg07921818_TC21	RAB40B	-0.484316	0.0260915
cg18965659_BC11	RAB40B	-0.472279	0.0306347
cg08267319_TC21	SIRT7	-0.503931	0.0198474
cg16293131_TC11	SIRT7	-0.450152	0.0405937
cg24049326_TC21	SIRT7	-0.436328	0.0479897
cg24286372_TC21	STEAP1	-0.453173	0.0391024
cg11365234_BC21	STEAP2	-0.46364	0.0342635
cg06978680_BC21	STEAP2	-0.447267	0.0420587
cg26940909_TC21	TRIM6	-0.495969	0.0222188
