# Supplementary material
Source: Research Square preprint supplement (doi:10.21203/rs.3.rs-9956001/v1)
Supplement: Supplementary file 2 [file 2c0a7d8afbee4e73115603b0.xlsx]

## Sheet: S4 Columns Description
Column Name	Description
Module	WGCNA co-expression module defined by hierarchical clustering and dynamic tree cutting; represents a cluster of genes with highly correlated expression profiles.
	Total number of genes within the WGCNA module.
N_DEG	Number of genes within the module that are differentially expressed (nominal p < 0.05 in the differential expression analysis).
Odds_Ratio	Odds ratio indicating the magnitude of enrichment of DEGs within the module. Values >1 represent enrichment, <1 represent depletion.
P_value	Fisher’s Exact Test significance value for enrichment of DEGs within the module compared to the background gene set.
DEG_List	Semicolon-separated list of DEGs (p < 0.05) present in the module.

## Sheet: S4 WGCNA Module DEG Enrichmen
Module	Module_Size	N_DEG	Odds_Ratio	P_value	DEG_List
Module1	81	30	8.61953	1.16624e-15	SELENOO;PALMD;RUNDC3B;CPZ;GALNT18;F3;KIAA1191;SARDH;LRRC17;MAP3K10;KCNMB4;TDG;ALDOA;ADGRL3;MRAS;TRIM58;FAM219A;NDEL1;PCDH7;GSTA4;ZNF160;OVCH2;LUZP2;LITAF;ZNF841;FAM114A1;DMD;KCTD11;OR2W3;GSTA1
Module8	131	35	5.35427	4.04607e-13	ALDH18A1;SDF4;PLOD1;MAPRE3;ATP5F1D;SLC25A1;ZNF106;NPDC1;CDH23;ALDH5A1;ADAM23;SIL1;FAM199X;FRMD8;MGAT3;APOL2;PLXNA3;EVI5L;KIAA0319L;FLG;CCNO;UBE2Q1;LRPAP1;C8orf34;LONRF2;MARCHF10;TOM1L2;BET1L;IGIP;FAAP100;NF2;AFAP1;KIAA1671;RUSC2;HYPK
Module9	49	13	5.19649	1.11197e-05	MAT2B;ATG5;LRRC40;VAPA;METTL4;KCTD9;RHEB;MAPK14;DPH6;THAP12;MRPL39;MTERF3;PSME3IP1
Module2	38	11	5.85318	2.14849e-05	SPA17;IRAK3;CHKA;CRYBG1;GNB4;LRRCC1;ANGPTL2;TRIM68;HSPBAP1;CSF1;ARPIN
Module10	53	11	3.75817	0.000549938	BCAT1;PPP4R3A;NCALD;WASL;GLI3;SSBP4;STRA6;C1orf56;SLC43A1;RTN4RL2;PGAP1
Module11	205	26	2.09764	0.000941931	SOX8;POLR3H;NCF2;SERP1;PPAN;KCNC3;DYSF;TMOD1;SCYL1;PRPS1;CYP2U1;ZNF91;COG7;TMT1B;POLH;DENND2C;DNAJC30;ARSJ;SNN;MT-ND6;MT-ND4;MT-ATP6;L1CAM;MT-ND4L;MT-ATP8;GALNT4
Module12	76	12	2.68908	0.00377479	TOLLIP;IL21R;USP35;RTL8C;LANCL3;KIT;PPIB;MFSD3;KRT80;LMAN2;ZNF622;POTEE
Module3	297	32	1.744	0.00394129	CDH10;PPP2R5B;MZF1;DDT;TBC1D10A;RNF215;SEC14L2;ARL2BP;NAT9;GADD45A;DUSP1;UQCR11;PCDH10;MAPK8IP3;GLIPR1;RTN1;RAB40B;RIT1;MAL2;NTRK2;MZT2B;RETREG1;C10orf90;FBXL13;AKR7A3;ACYP2;CTSF;NDUFA11;EME2;CCNL2;PWP2;OVCA2
Module4	1338	111	1.3272	0.00529792	SYPL1;POU2F2;MTREX;PTPRN;TMCC3;LAMC2;DGAT2;INPP5A;CA12;RAPGEF3;NUFIP1;CD82;ALG9;RBM27;MAPK1;SGSM3;SYNDIG1;DRP2;XYLT1;MYEF2;LYL1;DNM1;MTMR4;SLC1A2;PITPNM1;SLC35F5;STEAP3;PLA2G4A;KIF21B;NRP2;HEATR1;TEK;ARAP3;TOX2;TBCC;HS3ST3B1;NT5C;TSKS;EVI2A;PTPN12;RAC2;UNC13A;KRAS;SLC37A2;TTLL4;CAB39;TBC1D4;PPM1B;TACC2;ARSG;XPR1;MBOAT2;CSRNP1;PAK1;PIP4K2A;FRMD4A;PLEKHH2;HS3ST3A1;AK5;UCHL1;TMEM164;UBQLN4;FMNL3;NTN…
Module5	1652	132	1.27578	0.00859615	NUP160;FAM136A;CTPS2;MPHOSPH9;HPF1;TRAF3IP2;SNRNP40;GUCY1B1;CHI3L2;PKN2;ATP2B1;SENP1;ARG2;XPO1;IPO11;TFAP4;JAK2;CTCF;JAK3;SPIN1;TRDMT1;CASC3;ELP4;ELK3;KRR1;HSPA9;MLPH;ORC2;RPF1;RPS6KA1;GTF3C3;CPSF3;NUP43;EXOSC8;TRIM6;KIF18A;TMEM54;ARL4A;VPS26A;MED13L;BATF3;PREX1;ASH2L;SYT5;RTN4IP1;AFDN;THEMIS2;TOE1;BEX2;SLC43A3;NEK3;NUP42;CIDEB;SLCO5A1;CTDSPL2;NUP54;ANP32A;USP3;CPNE2;TAF4B;TTYH2;ILF2;CNOT9;TIFA;N…
Module6	1459	114	1.23547	0.0261245	CYP51A1;CYP26B1;CASP10;FMO3;PDIA5;RHOBTB1;ANKRD13A;GPC4;RIMS1;PTPRC;ABCB1;USP40;POLR2E;PIK3IP1;PYGB;PGK1;CEMIP;RABAC1;COMP;MEOX2;MPDZ;RNF141;TRPV4;MDGA1;TRIM38;TBX18;GOLPH3;NPR3;PFKFB4;IGFBP2;ADGRL2;SET;ZSCAN18;TAF1L;BMP4;FLRT3;RHOJ;CCDC32;IVD;EPB41L4A;GADD45G;PGPEP1;PRR7;SH3BP5;KL;NGF;KLRD1;EGLN1;HECW2;ABI2;SPPL2A;CCDC40;COL6A2;SIK1;ALDH9A1;PIK3R1;HAPLN1;YIPF5;SNX30;ADIRF;TMEM219;PRSS23;ITPR1;ZN…
Module7	219	22	1.60311	0.0308157	HSF2;ZZZ3;GINM1;ALPK1;TSG101;NFKB2;DUSP12;ICAM1;BRMS1L;GCK;COMMD2;TIA1;MRPS9;ABI1;BBS7;MBIP;HPS3;ZNF22;ENOX2;KLHL38;GSAP;SEPTIN10
Module13	58	8	2.28714	0.0348446	SNX11;EDN1;ARFIP2;CD63;ATP10D;PSD2;C5orf46;C11orf87
Module14	70	9	2.10949	0.0389045	NAT14;ARMCX3;NAPA;MFSD10;AOX1;LIPH;GOLGA2;KAZN;VAMP2
Module15	60	8	2.19871	0.0415204	ELOVL5;CCN4;GIMAP2;NIBAN1;ENPP2;ROBO3;RAB3IL1;CLDN23
Module16	106	12	1.82665	0.045073	CCDC92;IFI27L2;PDLIM2;FBXL12;SHBG;NPAS1;WTIP;TUFT1;JOSD2;POLD4;TMEM178B;RAB7B
Module17	34	5	2.4601	0.0691944	SH3BP2;PLCL1;MRAP2;KNDC1;UPK3BL2
Module18	114	12	1.68237	0.070823	SCMH1;KCNG1;TAFAZZIN;GTPBP10;AIMP2;ATE1;CEP70;ECSIT;NARS2;SGF29;C9orf50;ST6GALNAC3
Module19	52	6	1.86076	0.124099	RAB11FIP3;ACVR2A;OSBPL2;MYOZ1;DDR1;EPPK1
Module20	93	9	1.52916	0.156528	HEBP2;GORAB;ATF1;NARS1;LRRC49;MX1;ZSCAN21;WDR25;SRRM3
Module21	99	9	1.42655	0.201945	LPAR2;TPD52;MDFI;RDH5;PPP1R9A;CLDN1;NUDT14;TRABD2A;ENSG00000258311
Module22	64	6	1.47448	0.242625	ISOC2;COPE;NDUFA1;SEM1;ATP5ME;SERTAD1
Module23	71	6	1.31499	0.323025	GID8;GPI;P4HA1;ITGA7;MAPK7;KCTD7
Module24	92	7	1.17266	0.400835	IL32;ZC2HC1A;UBE2D3;MOB1A;METTL5;SLC30A8;SUCLG2
Module25	24	2	1.29365	0.473986	SLC25A24;CDYL2
Module26	267	18	1.02877	0.489934	SLC46A1;GMIP;GOLGA3;MED15;GPLD1;SLC36A1;SLC15A4;ANO7;STK32B;RHBDL2;JCAD;TRIM8;BAIAP2;ZBTB18;POFUT2;GPX3;ZBED6;NBPF10
Module27	229	15	0.996903	0.543239	TENT5A;KDM4B;SLC22A23;DCAF5;MFGE8;SERPINI1;SMAD3;CYB5D2;FAM234A;COL4A5;ZNF846;DAPK1;SIPA1L1;ENTPD7;ZSWIM8
Module28	48	3	0.948043	0.61897	WFDC1;CCDC24;TPM2
Module29	74	4	0.811919	0.725017	MYL6;CORIN;CCDC81;RUNDC1
Module30	57	3	0.789477	0.732375	NDUFC1;TXNDC15;COX14
Module31	40	2	0.74803	0.748767	TMEM134;EMID1
Module32	147	8	0.81697	0.757607	PRTFDC1;CCDC142;GLUL;SV2A;RAB26;SYT9;DMAP1;CAPS2
Module33	97	5	0.771729	0.772051	HIVEP1;CTF1;C4orf3;TAS2R1;TCAF1
Module34	44	2	0.676575	0.79455	BVES;SMCO3
Module35	64	3	0.698493	0.800776	TRMT5;C18orf21;PGAP2
Module36	47	2	0.631319	0.823886	ANKRD13D;MAN2A2
Module37	47	2	0.631319	0.823886	HAUS4;ZNF518A
Module38	224	10	0.660843	0.928852	FAM162A;NENF;RPL36;RPL27;SERF2;FAM124A;LENG8;ARMC10;ZNF254;RPS29
Module39	122	4	0.47984	0.963255	NDUFA2;GFM2;TAF13;PSG4
Module40	77	2	0.377915	0.966072	TIMM10;GYG1
Module41	50	1	0.289493	0.966748	ADGRB2
Module42	53	1	0.272727	0.972901	SERPINB8
Module43	53	1	0.272727	0.972901	STARD10
Module44	81	2	0.358667	0.973048	HDAC5;GPR176
Module45	83	2	0.349756	0.975995	TTC7A;ZBTB20
Module46	57	1	0.253167	0.979373	ZNF578
Module47	71	1	0.202311	0.992069	POLR2L
Module48	583	25	0.626851	0.993484	PHKA1;PROCR;MED31;ZNF330;ASF1A;RXYLT1;IL13RA2;RHBDF2;NOL11;TRIM21;IRAK2;ARL8B;ABHD13;PLPP2;AGTR1;TSEN2;STEAP2;ADORA2B;NPTX1;SFXN4;RPF2;MT-ND2;MT-ND5;RASGEF1A;BCL2L2-PABPN1
Module49	107	2	0.269303	0.994198	STAG2;CD109
Module50	77	1	0.186251	0.994737	SAMD4A
Module51	79	1	0.181447	0.995409	POPDC3
Module52	171	4	0.337736	0.996813	COL6A1;ABCA3;ZNF556;POLR2J2
Module53	102	1	0.139873	0.999048	CTNNA3
Module54	760	30	0.570142	0.999484	LARS2;XK;MICALL1;SALL1;SYNGR2;PRPH2;HBEGF;ERGIC1;NAA50;FBXL16;GNAI1;TST;LIF;DOCK4;MEIS2;B4GALNT1;OSBPL1A;TXNL4A;MRPS28;HSD17B12;SLC25A4;RABGAP1L;GPD1L;GPR155;NDUFA3;KCNK3;NAT1;NRIP3;FAM91A1;MRPL23
Module55	117	1	0.121642	0.999659	MRPS35
Module56	121	1	0.11755	0.999741	KIFAP3
Module57	251	5	0.285116	0.999821	FRMD4B;ACVR1;TTC29;PAMR1;C2CD3
Module58	549	15	0.389323	0.999989	PRKACA;SMPD3;FAM120B;PADI2;KLC1;DYNC1LI2;PLPP5;ANKRD1;ZKSCAN2;CDC42BPG;FAM222B;S1PR5;TMED9;MT-ND1;PPME1
Module59	1839	70	0.525794	1	KLHL13;ARHGEF5;OSBPL3;UBE2D1;SEC31B;C1QTNF3;DLG3;LAG3;PITPNM2;HPS4;SRPX;PDGFRL;ZDHHC2;CFAP69;PRUNE2;CA9;SH3GL2;UNC5B;ARFGEF3;NKTR;PRRX1;TMEM9;EGR1;EGR2;DAW1;PEPD;ABCC4;OPRL1;ASPHD2;PNPLA7;CCNA1;TSPAN2;GSTM5;TUBB2B;CGREF1;PARP16;CLBA1;NEIL1;IGFBP3;PDK1;CBS;FBXO27;CYGB;AK4;SLC25A34;ALPL;HAAO;DTX3L;WASHC5;RPUSD4;DCHS1;MEI1;LRRC28;GPRC5C;KRT19;SERF1A;RASGRP1;MAB21L3;PHYHD1;BNIP3;ZNF619;PLCXD3;PCBP2;T…
Module60	62	0	0	1	NA
Module61	59	0	0	1	NA
Module62	123	0	0	1	NA
Module63	50	0	0	1	NA
Module64	23	0	0	1	NA
