# Supplementary material
Source: Research Square preprint supplement (doi:10.21203/rs.3.rs-9956001/v1)
Supplement: Supplementary file 3 [file 42f78f407b323b0a5f52b8f1.xlsx]

## Sheet: S2 - Columns Description
Column Name	Description
Participant_ID	Unique anonymised identifier for each participant.
Aligned_Reads_Percent	Percentage of sequencing reads uniquely aligned to the reference genome.
Aligned_Reads_Millions	Number of unique aligned reads, expressed in millions of reads.

## Sheet: S2 - RNAseq alignment stats
Supplementary Table S2: RNA sequencing Alignment Statistics
Participant_ID	Aligned_Reads_Percent	Aligned_Reads_Millions
CN_010	0.875	87.6
CN_011	0.86	73.8
CN_012	0.865	80.7
CN_013	0.874	78.3
CN_014	0.864	63.5
CN_016	0.877	69.4
CN_021	0.872	45.1
CN_022	0.851	78.1
CN_023	0.872	84.5
SCZ_001	0.815	80.6
SCZ_002	0.851	79.8
SCZ_003	0.877	83.4
SCZ_004	0.872	77.8
SCZ_005	0.849	75.5
SCZ_006	0.869	89.7
SCZ_007	0.862	86.2
SCZ_009	0.86	79.7
SCZ_015	0.876	83.8
SCZ_018	0.827	33.7
SCZ_019	0.862	96.5
SCZ_020	0.879	74.9
