# Supplementary material
Source: Research Square preprint supplement (doi:10.21203/rs.3.rs-9956001/v1)
Supplement: Supplementary file 4 [file 4eb31392597b368ccee92573.xlsx]

## Sheet: S6 Column Description
Supplementary Table S6: Column Description
Column name	Description
Probe_ID	Illumina CpG probe identifier (EPICv2).
Delta_Beta	Effect estimate of methylation difference at the locus from SeSAMe DML (Δβ). Positive values indicate hypermethylation in SCZ; negative values indicate hypomethylation.
P_value	Unadjusted p-value for the differential methylation test at this CpG (SCZ vs control) from SeSAMe’s DML model.
Bacon_P_value	Bias-corrected p-value from SeSAMe after Bacon adjustment of test statistics.
FDR	Benjamini–Hochberg False Discovery Rate adjusted p-value for the DML test at this probe, controlling for multiple testing across all probes.
Chromosome	Chromosome on which the CpG probe is located (GRCh38).
Position	Genomic coordinate of the CpG probe on the given chromosome
CpG_Island_Position	CpG island annotation from UCSC.
CpG_Island_Relation	Probe’s relationship to CpG island (Island, Shore, Shelf, or OpenSea).
GENCODE_Group	GENCODE version 41 annotation group (e.g., promoter, exon, intron).
GENCODE_Gene_Name	GENCODE version 41 gene associated with the probe (ENSEMBL gene ID or gene symbol).
FANTOM5_Enhancer	FANTOM5 enhancer element the probe overlaps.
Regulatory_Feature_Group	Regulatory feature category assigned to the probe (eg. Promoter_Associated ).
Illumina_Enhancer	Illumina 450k enhancer annotation.

## Sheet: S6 SeSAMe DML p<0.1
Supplementary Table S6: Differentially Methylated Loci – Schizophrenia versus Control Participants
Probe_ID	Delta_Beta	P_value	Bacon_P_value	FDR	Chromosome	Position	CpG_Island_Position	CpG_Island_Relation	GENCODE_Group	GENCODE_Gene_Name	FANTOM5_Enhancer	Regulatory_Feature_Group	Illumina_Enhancer
cg17675122_BC21	0.459567	5.00739e-08	1.895e-08	0.0450119	chr12	6076725		OpenSea					FALSE
cg14665414_TC11	0.0181637	1.98993e-06	9.3397e-07	0.515265	chr6	29628797	chr6:29627521-29628187;chr6:29632264-29633378	Shore	TSS1500;TSS1500	ENSG00000204681.11;ENSG00000204681.11		Unclassified	TRUE
cg24607315_TC21	-0.0281991	2.7959e-06	1.5786e-06	0.515265	chr4	143513185	chr4:143513096-143514190	Island	TSS1500	ENSG00000153147.6		Promoter_Associated	TRUE
cg08295826_TC21	-0.0406997	2.89145e-06	1.63539e-06	0.515265	chr10	110947024		OpenSea					FALSE
cg27292870_BC21	0.644198	4.58569e-06	2.25984e-06	0.515265	chr1	38580308	chr1:38578493-38578861	Shore					FALSE
cg20368255_TC21	-0.152003	4.11514e-06	2.37033e-06	0.515265	chr15	49213250		OpenSea					FALSE
cg13684844_BC21	-0.0797709	4.2117e-06	2.42885e-06	0.515265	chr9	134042412		OpenSea	TSS1500	ENSG00000169925.17			FALSE
cg05874538_BC21	-0.190626	4.48963e-06	2.59768e-06	0.515265	chr8	141052990		OpenSea					FALSE
cg06478143_BC21	0.149474	7.49254e-06	3.79972e-06	0.647138	chr19	55157691	chr19:55156164-55157097;chr19:55160655-55161844	Shore	exon_1;exon_1;exon_1;exon_1;exon_1;exon_5;5UTR;5UTR;5UTR;TSS1500;TSS1500;TSS1500;TSS1500;TSS1500	TNNI3;TNNI3;TNNI3;TNNI3;TNNI3;ENSG00000267110;TNNI3;TNNI3;ENSG00000267110;ENSG00000129991.13;ENSG00000129991.13;ENSG00000129991.13;ENSG00000129991.13;ENSG00000267577.1			FALSE
cg22467052_TC21	0.0847615	7.95242e-06	4.04699e-06	0.647138	chr7	117667022		OpenSea	exon_27;exon_28;exon_27;exon_27;exon_27;exon_27;exon_28;exon_27;exon_26;exon_27;exon_27;exon_27;exon_26;exon_7;exon_3;3UTR;3UTR;3UTR;3UTR;3UTR;3UTR;3UTR;3UTR;5UTR	CFTR;CFTR;CFTR;CFTR;CFTR;CFTR;CFTR;CFTR;CFTR;CFTR;CFTR;CFTR;CFTR;CFTR;CFTR;CFTR;CFTR;CFTR;CFTR;CFTR;CFTR;CFTR;CFTR;CFTR			FALSE
cg13489819_BC11	-0.0157485	8.1862e-06	4.88529e-06	0.647138	chr5	151758825	chr5:151758431-151758857	Island	TSS200;TSS200	ENSG00000177556.12;ENSG00000177556.12		Promoter_Associated	TRUE
cg16813466_BC21	-0.10189	8.63897e-06	5.16977e-06	0.647138	chr11	132941483	chr11:132942767-132943180;chr11:132943667-132944500	Shore				Unclassified	TRUE
cg08968229_BC21	0.112191	1.14968e-05	5.97796e-06	0.738184	chr12	49825018	chr12:49827775-49828826	Shelf					FALSE
cg05466124_BC21	-0.0789844	1.041e-05	6.2895e-06	0.719815	chr12	101552480		OpenSea					FALSE
cg17303445_TC11	-0.0124634	1.47507e-05	9.07275e-06	0.883971	chr13	51584246	chr13:51583920-51585099	Island	TSS1500;TSS1500	ENSG00000139668.9;ENSG00000139668.9		Promoter_Associated	TRUE
cg01364382_TC21	0.0498843	1.77694e-05	9.47728e-06	0.887395	chr16	71867953		OpenSea	exon_5;exon_4;exon_3;exon_4;exon_4;exon_3;exon_4;exon_5;exon_4;exon_5;exon_5;exon_4;exon_4;exon_4;exon_4	ZNF821;ZNF821;ZNF821;ZNF821;ZNF821;ZNF821;ZNF821;ZNF821;ZNF821;ZNF821;ZNF821;ZNF821;ZNF821;ZNF821;ZNF821		Unclassified_Cell_type_specific	TRUE
cg22114211_TC21	-0.0300735	1.71125e-05	1.06057e-05	0.887395	chr10	89281669		OpenSea					FALSE
cg04705620_TC11	-0.0185534	1.72641e-05	1.07045e-05	0.887395	chr2	58047186	chr2:58046507-58047287	Island	TSS1500	ENSG00000287875.1		Promoter_Associated	TRUE
cg04526386_BC21	-0.0468695	2.38728e-05	1.50492e-05	0.999957	chr3	70971455		OpenSea	TSS1500	ENSG00000114861.24			FALSE
cg23389885_BC21	0.09776	3.20377e-05	1.76848e-05	0.999957	chr18	29380310		OpenSea					FALSE
cg21451253_BC11	-0.0173527	2.96245e-05	1.88816e-05	0.999957	chr1	5890773	chr1:5890764-5890969	Island					FALSE
cg12547063_TC21	0.142968	3.73249e-05	2.07877e-05	0.999957	chr19	3879689	chr19:3880720-3881280	Shore	TSS200;TSS1500;TSS1500;TSS1500	ENSG00000167654.18;ENSG00000167654.18;ENSG00000167654.18;ENSG00000167654.18			FALSE
cg22491927_TC11	-0.0150518	3.49178e-05	2.24424e-05	0.999957	chr19	13506277	chr19:13505938-13506453	Island	exon_1;exon_1;exon_1;exon_1;exon_1;exon_1;exon_1;5UTR;5UTR;5UTR;5UTR;5UTR;5UTR;5UTR;TSS200;TSS200;TSS200;TSS200;TSS200;TSS200;TSS200;TSS200;TSS1500;TSS1500;TSS200;TSS1500;TSS200	CACNA1A;CACNA1A;CACNA1A;CACNA1A;CACNA1A;CACNA1A;CACNA1A;CACNA1A;CACNA1A;CACNA1A;CACNA1A;CACNA1A;CACNA1A;CACNA1A;ENSG00000141837.22;ENSG00000141837.22;ENSG00000141837.22;ENSG00000141837.22;ENSG00000141837.22;ENSG00000141837.22;ENSG00000141837.22;ENSG00000141837.22;ENSG00000141837.22;ENSG00000141837.22;ENSG00000141837.22;ENSG00000141837.22;ENSG00000141837.22		Unclassified_Cell_type_specific	TRUE
cg21817750_BC22	-0.0355499	3.83404e-05	2.47596e-05	0.999957	chr5	72247279		OpenSea					FALSE
cg13796211_TC21	0.0957266	4.55615e-05	2.56715e-05	0.999957	chr10	6365970		OpenSea					FALSE
cg06702885_TC11	-0.0381252	4.15043e-05	2.6911e-05	0.999957	chr21	43659388	chr21:43657790-43659940	Island	exon_1;exon_1;5UTR;5UTR;TSS200	HSF2BP;HSF2BP;HSF2BP;HSF2BP;ENSG00000160208.13		Promoter_Associated_Cell_type_specific	TRUE
cg20518352_BC21	0.0625563	4.85631e-05	2.74647e-05	0.999957	chr15	65212186		OpenSea	TSS1500	ENSG00000138615.6		Unclassified	TRUE
cg13503583_TC11	-0.00701904	4.24308e-05	2.75425e-05	0.999957	chr14	104815934	chr14:104815494-104816638	Island	TSS200	ENSG00000279140.1		Promoter_Associated	TRUE
cg18845578_BC11	-0.0252293	4.24486e-05	2.75547e-05	0.999957	chr2	239081478	chr2:239084086-239084332	Shelf	TSS1500	ENSG00000068024.18		Unclassified_Cell_type_specific	TRUE
cg05554887_BC21	-0.0465689	4.32241e-05	2.80839e-05	0.999957	chr2	100045406		OpenSea					FALSE
cg20552487_TC21	-0.0214328	4.44623e-05	2.89299e-05	0.999957	chr7	12570540	chr7:12570539-12571209	Island	exon_2;TSS200;TSS200;TSS200;TSS200	ENSG00000225606;ENSG00000006747.15;ENSG00000006747.15;ENSG00000006747.15;ENSG00000006747.15			FALSE
cg07197016_TC21	-0.0444857	4.62316e-05	3.01407e-05	0.999957	chr12	121776325		OpenSea	exon_12;exon_12;exon_10;exon_1;exon_1;3UTR;3UTR;5UTR;TSS200	TMEM120B;TMEM120B;TMEM120B;TMEM120B;TMEM120B;TMEM120B;TMEM120B;TMEM120B;ENSG00000188735.13		Unclassified	TRUE
cg23448101_TC11	0.00664615	5.40087e-05	3.07342e-05	0.999957	chr5	123423129	chr5:123422964-123423636	Island	exon_1;exon_1;exon_1;exon_1;exon_1;exon_1;exon_1;exon_1;exon_1;exon_1;5UTR;5UTR;5UTR;5UTR;5UTR;5UTR;5UTR;5UTR;5UTR;TSS200;TSS200;TSS200	CEP120;CEP120;CEP120;CEP120;CEP120;CEP120;CEP120;CEP120;CEP120;CEP120;CEP120;CEP120;CEP120;CEP120;CEP120;CEP120;CEP120;CEP120;CEP120;ENSG00000168944.17;ENSG00000168944.17;ENSG00000168944.17		Promoter_Associated	TRUE
cg03964941_BC21	0.114325	5.65484e-05	3.22658e-05	0.999957	chr6	26272899	chr6:26271117-26271360;chr6:26272242-26272468;chr6:26273062-26273329	Shore	TSS1500;TSS200;TSS1500;TSS200	ENSG00000273983.2;ENSG00000218690.2;ENSG00000218690.2;ENSG00000278588.2		Promoter_Associated	TRUE
cg25460807_TC11	0.120293	5.82423e-05	3.32895e-05	0.999957	chr8	22050511	chr8:22047950-22048246;chr8:22048823-22049419	Shore					FALSE
cg11340793_TC11	0.0103805	5.86101e-05	3.35119e-05	0.999957	chr12	9648462	chr12:9647947-9648256	Shore	exon_1;exon_1;TSS1500;TSS1500;TSS1500	ENSG00000256594;ENSG00000256594;ENSG00000256442.2;ENSG00000256442.2;ENSG00000256442.2		Promoter_Associated	TRUE
cg07221695_TC21	0.126796	5.9683e-05	3.41615e-05	0.999957	chr1	232514124		OpenSea	exon_2;exon_5;exon_3;exon_4;exon_3;exon_2;exon_3	SIPA1L2;SIPA1L2;SIPA1L2;SIPA1L2;SIPA1L2;SIPA1L2;SIPA1L2			FALSE
cg01605638_BC21	0.0247634	6.41849e-05	3.68943e-05	0.999957	chr1	172432206		OpenSea					FALSE
cg27620765_TC21	0.052586	6.42558e-05	3.69374e-05	0.999957	chr2	160561809		OpenSea					FALSE
cg02815248_BC21	0.0324923	6.73237e-05	3.88063e-05	0.999957	chr10	35493052		OpenSea					FALSE
cg08089693_BC21	0.084135	6.74114e-05	3.88598e-05	0.999957	chr6	39131095		OpenSea					FALSE
cg02089848_BC21	0.0647541	6.77131e-05	3.90438e-05	0.999957	chr11	24455366		OpenSea	TSS1500	ENSG00000207252.1			FALSE
cg08695120_TC21	0.0123729	6.97977e-05	4.0317e-05	0.999957	chr16	87317499	chr16:87317028-87317964	Island	exon_1;exon_1;TSS200;TSS200;TSS200	C16orf95-DT;C16orf95-DT;ENSG00000260456.7;ENSG00000260456.7;ENSG00000260456.7		Promoter_Associated	TRUE
cg13858611_BC21	0.129647	7.30087e-05	4.22824e-05	0.999957	chr6	6001609	chr6:5998916-5999730;chr6:6002287-6004772	Shore					FALSE
cg10219850_BC21	0.0874036	7.36433e-05	4.26714e-05	0.999957	chr1	215200106		OpenSea					FALSE
cg06821841_TC21	0.177828	7.63685e-05	4.43443e-05	0.999957	chr15	66269787		OpenSea					FALSE
cg02934718_BC11	-0.0224735	7.3747e-05	4.92298e-05	0.999957	chr17	61443938		OpenSea					FALSE
cg19740242_TC21	-0.0484248	7.50439e-05	5.01397e-05	0.999957	chr14	77549161		OpenSea	TSS1500	ENSG00000240233.3			FALSE
cg11373066_BC21	-0.133962	7.50709e-05	5.01587e-05	0.999957	chr9	134690263		OpenSea					FALSE
cg02376677_TC21	0.138571	8.63881e-05	5.05236e-05	0.999957	chr1	87869927		OpenSea					FALSE
cg24952408_TC21	0.0436102	8.72025e-05	5.10278e-05	0.999957	chr6	29728487		OpenSea	exon_2;exon_5;5UTR;TSS1500	HLA-F;HLA-F-AS1;HLA-F;ENSG00000239257.1			FALSE
cg13358280_TC21	-0.0415826	7.75371e-05	5.18911e-05	0.999957	chr9	3830393		OpenSea	exon_1	GLIS3			FALSE
cg03159563_TC11	-0.00932719	7.91687e-05	5.30388e-05	0.999957	chr19	49461969	chr19:49461770-49462109;chr19:49464191-49464594	Island	exon_4;exon_7;exon_6;exon_5;3UTR;TSS1500	ALDH16A1;ALDH16A1;ALDH16A1;ALDH16A1;ALDH16A1;ENSG00000269469.1			FALSE
cg22935551_BC11	0.0161683	9.66524e-05	5.68974e-05	0.999957	chr19	35059750	chr19:35059646-35059928	Island	exon_5;exon_6;exon_5;exon_4;exon_5;exon_3;exon_3;exon_2;exon_4;exon_2;exon_2;exon_3;exon_4	HPN;HPN;HPN;HPN;HPN;HPN;HPN;HPN;HPN;HPN;HPN;HPN-AS1;HPN-AS1			FALSE
cg21383697_TC21	-0.0300046	8.75229e-05	5.89333e-05	0.999957	chr2	128407445		OpenSea					FALSE
cg05344430_TC11	-0.0148163	9.39976e-05	6.35213e-05	0.999957	chr13	27792463	chr13:27789606-27790132;chr13:27791408-27791648;chr13:27792412-27794368	Island	TSS200	ENSG00000169840.5		Unclassified_Cell_type_specific	TRUE
cg17996902_TC21	0.15136	0.000108375	6.42249e-05	0.999957	chr14	74754398		OpenSea					FALSE
cg27510539_BC21	0.146454	0.000109682	6.50447e-05	0.999957	chr3	42501669	chr3:42501328-42503032	Island	TSS1500;TSS1500;TSS1500;TSS1500;TSS1500;TSS1500;TSS1500;TSS1500;TSS1500	ENSG00000114812.13;ENSG00000114812.13;ENSG00000114812.13;ENSG00000114812.13;ENSG00000114812.13;ENSG00000114812.13;ENSG00000114812.13;ENSG00000114812.13;ENSG00000114812.13		Promoter_Associated	TRUE
cg01449563_TC21	-0.160794	9.64382e-05	6.52549e-05	0.999957	chr6	31970595	chr6:31971953-31972782	Shore	exon_3;exon_2;exon_2;exon_2;exon_2;TSS1500;TSS1500;TSS1500;TSS1500;TSS1500;TSS1500	DXO;DXO;DXO;DXO;DXO;ENSG00000204344.16;ENSG00000204344.16;ENSG00000204344.16;ENSG00000204344.16;ENSG00000204344.16;ENSG00000204344.16			FALSE
cg14253848_TC11	0.0145847	0.000110891	6.58034e-05	0.999957	chr9	128276238	chr9:128275312-128276416	Island	exon_1;exon_1;5UTR;5UTR;TSS1500;TSS1500;TSS1500;TSS1500;TSS1500;TSS1500;TSS1500;TSS1500;TSS1500;TSS1500;TSS1500;TSS1500;TSS200;TSS200;TSS200	SWI5;SWI5;SWI5;SWI5;ENSG00000167110.19;ENSG00000167110.19;ENSG00000167110.19;ENSG00000167110.19;ENSG00000167110.19;ENSG00000167110.19;ENSG00000167110.19;ENSG00000167110.19;ENSG00000167110.19;ENSG00000167110.19;ENSG00000167110.19;ENSG00000167110.19;ENSG00000175854.15;ENSG00000175854.15;ENSG00000175854.15		Promoter_Associated	TRUE
cg21112508_BC21	-0.0558967	9.80228e-05	6.63816e-05	0.999957	chr16	9535575		OpenSea					FALSE
cg13408451_TC21	0.193121	0.000114259	6.79203e-05	0.999957	chr9	10268793		OpenSea					FALSE
cg14146959_BC21	0.028288	0.000115343	6.86025e-05	0.999957	chr7	24753394	chr7:24756922-24757868	Shelf					FALSE
cg00414969_BC21	0.347787	0.000115717	6.88382e-05	0.999957	chr1	23968137		OpenSea	exon_6;3UTR	SRSF10;SRSF10			FALSE
cg17980106_TO11	0.0658981	0.000116193	6.91375e-05	0.999957	chr12	100168952		OpenSea	exon_6;exon_4	GOLGA2P5;GOLGA2P5			FALSE
cg18114468_BC21	0.0779049	0.00011797	7.02572e-05	0.999957	chr8	78853145		OpenSea					FALSE
cg01959980_BC21	-0.0751467	0.000104553	7.10345e-05	0.999957	chr2	73389704	chr2:73385527-73386533	Shelf					FALSE
cg20918381_BC21	0.0571471	0.000122091	7.2857e-05	0.999957	chr6	4951091		OpenSea					FALSE
cg07412562_TC21	0.0992535	0.000122926	7.33841e-05	0.999957	chr6	147675563		OpenSea	TSS1500	ENSG00000227681.5			FALSE
cg15156768_TC21	0.0453054	0.000122952	7.34007e-05	0.999957	chr15	51652654		OpenSea					FALSE
cg06928638_BC21	0.0155239	0.000123791	7.3931e-05	0.999957	chr4	107666614		OpenSea					FALSE
cg12754019_TC21	-0.158972	0.000109377	7.44807e-05	0.999957	chr1	108039037		OpenSea	TSS1500	ENSG00000226822.4	chr1:108038697-108039176		FALSE
cg11214438_BC21	-0.0979943	0.000109384	7.44861e-05	0.999957	chr7	72539239		OpenSea					FALSE
cg05169244_BC11	0.00975621	0.000125123	7.4773e-05	0.999957	chr21	17513326	chr21:17512488-17513793	Island					FALSE
cg07308232_BC21	-0.0399557	0.00011045	7.52484e-05	0.999957	chr7	1032285	chr7:1027295-1028609	Shelf					FALSE
cg15646495_BC11	-0.0216041	0.000110503	7.52867e-05	0.999957	chr19	2310328	chr19:2307567-2308445	Shore					FALSE
cg12029765_TC21	-0.032341	0.000112023	7.63747e-05	0.999957	chr7	158804491	chr7:158803753-158804560	Island					FALSE
cg01650480_BC21	-0.0742958	0.000113269	7.72669e-05	0.999957	chr10	16996739		OpenSea					FALSE
cg00493068_TC21	-0.128219	0.000113833	7.76709e-05	0.999957	chr11	50301591	chr11:50298084-50298601	Shelf					FALSE
cg21982119_TC21	-0.175758	0.000115586	7.89275e-05	0.999957	chr7	140674131	chr7:140672765-140673643	Shore	exon_1;exon_1;TSS200;exon_1;TSS1500	ADCK2;ADCK2;ENSG00000146966.13;ADCK2;ENSG00000133597.11		Promoter_Associated	TRUE
cg09632011_BC21	0.184913	0.000132212	7.92627e-05	0.999957	chr20	34921773		OpenSea	exon_1;TSS1500	ACSS2;ENSG00000131069.20			FALSE
cg24072924_TC11	-0.0123997	0.000118504	8.1022e-05	0.999957	chr5	111757888	chr5:111757499-111758217	Island	TSS1500;TSS1500;TSS200;TSS1500;TSS1500;TSS1500;TSS1500;TSS1500;TSS1500;TSS1500;TSS1500;TSS1500;TSS1500;TSS1500	ENSG00000134986.14;ENSG00000134986.14;ENSG00000134986.14;ENSG00000134986.14;ENSG00000134986.14;ENSG00000134986.14;ENSG00000134986.14;ENSG00000134986.14;ENSG00000134986.14;ENSG00000134986.14;ENSG00000134986.14;ENSG00000134986.14;ENSG00000134986.14;ENSG00000134986.14		Promoter_Associated	TRUE
cg00018305_TC21	-0.0492334	0.000119018	8.13909e-05	0.999957	chr17	82581210	chr17:82583672-82583878;chr17:82584036-82584243	Shelf					FALSE
cg23576260_TC21	0.0180502	0.000135814	8.15497e-05	0.999957	chr20	45972339	chr20:45971166-45972568	Island	TSS200	ENSG00000198026.8		Promoter_Associated	TRUE
cg00672981_BC21	-0.115998	0.000119759	8.19237e-05	0.999957	chr9	35737317		OpenSea	exon_17;exon_2;exon_17;3UTR;3UTR	GBA2;GBA2;GBA2;GBA2;GBA2		Gene_Associated	TRUE
cg12252866_TC11	0.00809856	0.000136504	8.1988e-05	0.999957	chr3	50226254	chr3:50226253-50226476;chr3:50226970-50227669	Island	TSS200;TSS1500;TSS1500	ENSG00000114353.17;ENSG00000114353.17;ENSG00000275334.1		Unclassified	TRUE
cg02945359_BC21	0.0476093	0.000137284	8.24839e-05	0.999957	chr6	29726899	chr6:29723329-29724316	Shelf	exon_7;exon_3;exon_6;exon_1	HLA-F;HLA-F;HLA-F-AS1;RPL23AP1			FALSE
cg06876140_TC21	0.0176147	0.000141819	8.537e-05	0.999957	chr5	58582058	chr5:58582898-58583350	Shore	TSS200;TSS1500	ENSG00000152932.8;ENSG00000152932.8			FALSE
cg24489813_TC11	-0.00756023	0.000126219	8.65711e-05	0.999957	chr12	53180546	chr12:53180241-53181366	Island	TSS200;TSS200	ENSG00000139651.11;ENSG00000139651.11		Promoter_Associated	TRUE
cg06878802_BC21	0.174459	0.000146174	8.81467e-05	0.999957	chr16	27362128		OpenSea					FALSE
cg24256121_BC21	0.0636416	0.000146457	8.83275e-05	0.999957	chr19	18089351		OpenSea					FALSE
cg16924664_TC11	-0.0483206	0.000129127	8.86671e-05	0.999957	chr22	36482133		OpenSea	TSS1500;TSS1500;TSS1500;TSS1500;TSS1500	ENSG00000100348.10;ENSG00000100348.10;ENSG00000100348.10;ENSG00000100348.10;ENSG00000100348.10		Promoter_Associated	TRUE
cg01597224_BC21	0.0893999	0.000147821	8.9198e-05	0.999957	chr2	198096830		OpenSea					FALSE
cg02420324_BC21	0.0484039	0.000147838	8.92085e-05	0.999957	chr3	98907606		OpenSea	TSS1500	ENSG00000207331.1			FALSE
cg07760125_BC21	0.0436884	0.000148765	8.98008e-05	0.999957	chr17	43530729		OpenSea	TSS1500	ENSG00000175832.13			FALSE
cg00474592_BC21	-0.0981035	0.00013081	8.98811e-05	0.999957	chr9	133444192		OpenSea				Unclassified_Cell_type_specific	TRUE
cg10034963_BC21	-0.086497	0.000130916	8.99577e-05	0.999957	chr12	46222881		OpenSea					FALSE
cg05399554_TC21	-0.0455393	0.000135302	9.31256e-05	0.999957	chr3	119344051		OpenSea					FALSE
cg21176629_BC21	-0.070316	0.000135452	9.32336e-05	0.999957	chr8	66925871	chr8:66925245-66925719	Shore	TSS1500;TSS1500;TSS1500;TSS1500;TSS1500;TSS1500;TSS1500	ENSG00000245910.9;ENSG00000245910.9;ENSG00000245910.9;ENSG00000245910.9;ENSG00000245910.9;ENSG00000245910.9;ENSG00000245910.9		Promoter_Associated	TRUE
cg02909969_BC21	-0.0393874	0.00013893	9.57494e-05	0.999957	chr15	40331513		OpenSea	exon_7;exon_8;exon_11;3UTR	CCDC9B;CCDC9B;CCDC9B;CCDC9B			FALSE
cg03024678_TC11	0.0369214	0.000158404	9.59691e-05	0.999957	chr17	8006527	chr17:8002609-8004127;chr17:8006391-8006723	Island	exon_4	GUCY2D			FALSE
cg04719387_TC21	0.0313352	0.000161028	9.76525e-05	0.999957	chr12	12220024		OpenSea					FALSE
ch.3.2997854F_BC21	0.0357377	0.000161875	9.81961e-05	0.999957	chr3	152146809		OpenSea					FALSE
cg21738464_BC21	-0.13832	0.00014559	0.000100576	0.999957	chr15	72914941		OpenSea					FALSE
cg02880914_TC21	0.0233927	0.000167227	0.000101635	0.999957	chr2	60989575		OpenSea					FALSE
cg25744898_BC21	-0.0327611	0.000148242	0.000102501	0.999957	chr12	103496233	chr12:103495458-103496065	Shore	TSS1500;TSS1500;TSS1500;TSS1500;TSS1500;TSS1500;TSS1500;TSS1500;TSS1500;TSS1500	ENSG00000179088.16;ENSG00000179088.16;ENSG00000179088.16;ENSG00000179088.16;ENSG00000179088.16;ENSG00000179088.16;ENSG00000179088.16;ENSG00000179088.16;ENSG00000179088.16;ENSG00000179088.16		Unclassified	TRUE
cg12689862_BC21	-0.0811011	0.00015012	0.000103865	0.999957	chr4	77044179		OpenSea					FALSE
cg12672914_BC21	-0.0301217	0.000150477	0.000104124	0.999957	chr1	156268368		OpenSea	exon_8;TSS1500	SMG5;ENSG00000198952.8			FALSE
cg14615833_TC21	0.0737658	0.000173121	0.000105429	0.999957	chr7	158995844	chr7:158992570-158993080;chr7:158996795-158997328	Shore					FALSE
cg12547959_TC21	0.076216	0.000174921	0.000106589	0.999957	chr5	14326044		OpenSea				Unclassified_Cell_type_specific	TRUE
cg05724271_BC21	0.181323	0.000177283	0.000108113	0.999957	chr7	8111436		OpenSea					FALSE
cg01758450_TC11	0.0177454	0.000178087	0.000108632	0.999957	chr3	194672233	chr3:194672079-194672649	Island	exon_1;TSS200;TSS200	LSG1;ENSG00000041802.11;ENSG00000041802.11		Promoter_Associated	TRUE
cg04974940_BC21	0.0406546	0.000181261	0.000110682	0.999957	chr14	90527068	chr14:90525423-90525638	Shore	exon_20;3UTR	TTC7B;TTC7B			FALSE
cg15201126_BC21	0.0641372	0.000183563	0.000112169	0.999957	chr10	71270467		OpenSea				Unclassified_Cell_type_specific	TRUE
cg24700678_TC21	0.0217807	0.000184516	0.000112786	0.999957	chr19	49665209	chr19:49664433-49664941;chr19:49665578-49666085	Shore	exon_1;exon_1;exon_1;5UTR;5UTR;5UTR;TSS200;TSS1500;TSS1500;TSS1500;TSS1500;TSS1500;TSS1500;TSS1500;TSS1500;TSS1500;TSS1500;TSS1500;TSS1500;TSS1500;TSS1500;TSS1500;TSS1500;TSS1500;TSS1500;TSS1500;TSS1500;TSS1500	IRF3;IRF3;BCL2L12;BCL2L12;IRF3;IRF3;ENSG00000126456.16;ENSG00000126456.16;ENSG00000126456.16;ENSG00000126456.16;ENSG00000126456.16;ENSG00000126453.11;ENSG00000126453.11;ENSG00000126453.11;ENSG00000126453.11;ENSG00000126453.11;ENSG00000126453.11;ENSG00000126453.11;ENSG00000126453.11;ENSG00000126453.11;ENSG00000126453.11;ENSG00000126453.11;ENSG00000126453.11;ENSG00000126453.11;ENSG00000126453.11;EN…		Promoter_Associated	TRUE
cg20795139_BC11	0.0124616	0.00018571	0.000113558	0.999957	chr3	154121353	chr3:154120998-154122591	Island	TSS200;TSS200;TSS200;TSS200;TSS200;TSS200;TSS200;TSS200;TSS1500;TSS200;TSS200;TSS200;TSS200;TSS200	ENSG00000243069.9;ENSG00000243069.9;ENSG00000243069.9;ENSG00000243069.9;ENSG00000243069.9;ENSG00000243069.9;ENSG00000243069.9;ENSG00000243069.9;ENSG00000243069.9;ENSG00000243069.9;ENSG00000243069.9;ENSG00000114790.13;ENSG00000114790.13;ENSG00000114790.13		Promoter_Associated	TRUE
cg00711132_BC21	0.0203905	0.000187655	0.000114817	0.999957	chr7	87877177	chr7:87875785-87877178	Island	TSS1500;TSS1500;TSS1500	ENSG00000075303.13;ENSG00000075303.13;ENSG00000075303.13			FALSE
cg05912082_BC21	0.013024	0.000188894	0.000115619	0.999957	chr12	13044616	chr12:13044304-13044847	Island				Promoter_Associated_Cell_type_specific	TRUE
cg19583655_BC21	-0.0878175	0.000168698	0.000117403	0.999957	chr17	81911876	chr17:81910811-81911935	Island	TSS1500;TSS1500;TSS1500;TSS1500;TSS1500;TSS1500;TSS1500;TSS1500;TSS1500;TSS1500;TSS1500;TSS1500;TSS1500	ENSG00000185813.11;ENSG00000185813.11;ENSG00000185813.11;ENSG00000185813.11;ENSG00000185813.11;ENSG00000185813.11;ENSG00000185813.11;ENSG00000185813.11;ENSG00000185813.11;ENSG00000185813.11;ENSG00000185813.11;ENSG00000185813.11;ENSG00000185813.11		Promoter_Associated	TRUE
cg18328979_TC21	0.0459376	0.00019188	0.000117554	0.999957	chr12	128784642		OpenSea					FALSE
cg26120226_TC21	-0.162574	0.000170042	0.000118386	0.999957	chr1	201466147	chr1:201468391-201469520	Shelf	exon_2;exon_3;exon_2;exon_3;3UTR;3UTR;TSS1500	PHLDA3;PHLDA3;PHLDA3;PHLDA3;PHLDA3;PHLDA3;ENSG00000224818.1			FALSE
cg18601682_BC21	-0.132486	0.000170708	0.000118873	0.999957	chr12	2721238		OpenSea					FALSE
cg06809675_BC11	-0.0111758	0.000171055	0.000119126	0.999957	chr12	54473528		OpenSea	TSS1500;TSS1500	ENSG00000170627.11;ENSG00000170627.11			FALSE
cg16866330_TC21	-0.0510657	0.000175329	0.000122254	0.999957	chr11	108343240		OpenSea	exon_57;exon_57;exon_55;exon_56;exon_58;exon_57;exon_31;exon_26;exon_23;exon_21;exon_20;exon_7;exon_8;exon_5;3UTR;3UTR	ATM;ATM;ATM;ATM;ATM;ATM;ATM;ATM;ATM;ATM;ATM;ATM;ATM;ATM;ATM;ATM			FALSE
cg16342842_BC21	0.122916	0.00020229	0.000124313	0.999957	chr10	17981775		OpenSea					FALSE
cg20060928_TC21	0.0352453	0.000203857	0.000125332	0.999957	chr8	134696608		OpenSea	TSS200;TSS200;TSS200;TSS200;TSS200;TSS200	ENSG00000066827.16;ENSG00000066827.16;ENSG00000066827.16;ENSG00000066827.16;ENSG00000066827.16;ENSG00000066827.16			FALSE
cg03611826_BC21	0.0471144	0.000210417	0.000129604	0.999957	chr10	24449752		OpenSea	exon_1;5UTR	KIAA1217;KIAA1217			FALSE
cg02734208_TC21	0.0158415	0.000213597	0.000131677	0.999957	chr22	19122549	chr22:19121555-19122816	Island	TSS200;TSS200;TSS200;TSS200	ENSG00000070413.20;ENSG00000070413.20;ENSG00000070413.20;ENSG00000070413.20		Promoter_Associated	TRUE
cg04093645_TC21	0.199817	0.000213955	0.000131911	0.999957	chr5	128536344	chr5:128536265-128536570;chr5:128536870-128538947	Island				Unclassified_Cell_type_specific	TRUE
cg07517945_BC21	0.0504553	0.000214899	0.000132527	0.999957	chr1	207872395	chr1:207868517-207869373	Shelf					FALSE
cg12439870_BC21	0.0452926	0.000214901	0.000132528	0.999957	chr1	20687876		OpenSea	exon_8;exon_8;exon_8	KIF17;KIF17;KIF17			FALSE
cg24554073_BC21	0.0954155	0.000217636	0.000134314	0.999957	chr19	41887885	chr19:41882798-41884656	Shelf				Promoter_Associated	TRUE
cg12775613_TC21	0.0513585	0.000219653	0.000135631	0.999957	chr3	87990884		OpenSea	exon_3	HTR1F			FALSE
cg13576200_BC21	0.0978084	0.000220055	0.000135894	0.999957	chr12	51717633	chr12:51721626-51721895	Shelf					FALSE
cg15635633_TC21	-0.167109	0.00019511	0.000136777	0.999957	chr2	160993912		OpenSea					FALSE
cg25924563_BC21	-0.0695226	0.000196293	0.000137648	0.999957	chr21	43640661		OpenSea					FALSE
cg08227465_BC11	0.0124373	0.000223553	0.000138181	0.999957	chr20	63568756	chr20:63562613-63567632;chr20:63569299-63569600;chr20:63572298-63573226	Shore	exon_6;TSS1500;TSS200	HELZ2;ENSG00000130589.16;ENSG00000130589.16			FALSE
cg13066983_BC21	-0.0538008	0.000197805	0.000138762	0.999957	chr3	68008163	chr3:68007756-68008024	Shore				Unclassified_Cell_type_specific	TRUE
cg20745987_BC11	-0.17826	0.000198448	0.000139235	0.999957	chr4	154781608	chr4:154781188-154782176	Island	exon_1;5UTR;TSS1500	RBM46;RBM46;ENSG00000151962.8			FALSE
cg05695991_BC21	0.139833	0.000225675	0.000139569	0.999957	chr11	1349748		OpenSea	TSS1500	ENSG00000285985.1			FALSE
cg11405027_BC21	-0.0706485	0.000201817	0.000141719	0.999957	chr3	143183468		OpenSea					FALSE
cg15815789_BC21	-0.0380126	0.000203565	0.000143008	0.999957	chr2	127294946	chr2:127293771-127294281	Shore	TSS1500;TSS1500;TSS1500;TSS1500;TSS1500;TSS1500;TSS1500;TSS1500;TSS1500;TSS1500;TSS1500;TSS1500;TSS1500	ENSG00000163161.14;ENSG00000163161.14;ENSG00000163161.14;ENSG00000163161.14;ENSG00000163161.14;ENSG00000163161.14;ENSG00000163161.14;ENSG00000163161.14;ENSG00000163161.14;ENSG00000163161.14;ENSG00000163161.14;ENSG00000163161.14;ENSG00000163161.14			FALSE
cg23138678_BC11	0.0150366	0.000231884	0.000143636	0.999957	chr14	75427580	chr14:75427605-75428646	Shore	exon_1;exon_1;TSS200;TSS1500;TSS1500;TSS1500;TSS1500;TSS1500;TSS1500	JDP2-AS1;JDP2-AS1;ENSG00000140044.13;ENSG00000140044.13;ENSG00000140044.13;ENSG00000140044.13;ENSG00000140044.13;ENSG00000140044.13;ENSG00000140044.13		Promoter_Associated	TRUE
cg05617886_BC21	0.148605	0.000232414	0.000143983	0.999957	chr1	151766536	chr1:151762969-151763617	Shelf	exon_1;TSS200;TSS200;TSS200;TSS1500;TSS1500;exon_1;5UTR	ENSG00000268288;ENSG00000143450.19;ENSG00000143450.19;ENSG00000143450.19;ENSG00000143450.19;ENSG00000143450.19;OAZ3;OAZ3			FALSE
cg08924233_BC21	0.0803905	0.000232961	0.000144341	0.999957	chr6	48099650		OpenSea					FALSE
cg23991368_TC21	0.0104394	0.000233074	0.000144416	0.999957	chr14	101948392	chr14:101947920-101948883	Island	exon_1;TSS1500	ENSG00000271780;ENSG00000289482.1		Promoter_Associated	TRUE
cg04121562_BC21	0.110269	0.000237305	0.000147191	0.999957	chr6	78489988		OpenSea					FALSE
cg07072065_BC21	0.0666297	0.000240185	0.000149082	0.999957	chr7	144464044		OpenSea					FALSE
cg07142131_BC21	0.0603315	0.000241582	0.000149999	0.999957	chr1	21921456		OpenSea					FALSE
cg23865769_BC21	-0.152311	0.000213421	0.000150286	0.999957	chr12	118025393		OpenSea	exon_1;TSS1500	ENSG00000277873;ENSG00000111445.14			FALSE
cg02878102_BC21	-0.112663	0.000214679	0.000151217	0.999957	chr19	52892382		OpenSea	TSS1500;TSS200	ENSG00000182986.15;ENSG00000182986.15			FALSE
cg14154651_BC11	0.00983988	0.000244501	0.000151918	0.999957	chr8	94640349	chr8:94638978-94639532;chr8:94640227-94640645;chr8:94641670-94642505	Island	TSS1500;TSS1500;TSS1500;TSS1500;TSS1500;TSS1500;TSS1500	ENSG00000261437.1;ENSG00000104413.18;ENSG00000104413.18;ENSG00000104413.18;ENSG00000104413.18;ENSG00000104413.18;ENSG00000104413.18			FALSE
cg18475523_BC21	0.118534	0.000244672	0.00015203	0.999957	chr7	29281904		OpenSea			chr7:29281728-29282355		FALSE
cg07702916_BC21	-0.0454714	0.000217419	0.000153244	0.999957	chr1	156961895		OpenSea				Unclassified_Cell_type_specific	TRUE
cg25714963_TC21	-0.0979986	0.000219474	0.000154765	0.999957	chr17	55116618		OpenSea					FALSE
cg11865226_TC21	0.0958243	0.000249384	0.00015513	0.999957	chr4	183912666		OpenSea					FALSE
cg26363695_TC21	0.0442441	0.000249717	0.000155349	0.999957	chr4	79282145		OpenSea					FALSE
cg17576166_TC21	-0.108839	0.000223251	0.000157563	0.999957	chr12	49041978		OpenSea	exon_30;exon_30;exon_29;exon_29;exon_2;exon_2;exon_8;TSS1500	KMT2D;KMT2D;KMT2D;KMT2D;KMT2D;KMT2D;KMT2D;ENSG00000167548.18			FALSE
cg04362960_BC11	0.0159433	0.000253348	0.00015774	0.999957	chr10	103193236	chr10:103192485-103193475	Island	exon_1;exon_1;exon_1;exon_1;exon_1;exon_1;exon_1;exon_1;exon_1;exon_1;exon_1;exon_1;5UTR;5UTR;5UTR;5UTR;5UTR;5UTR;5UTR;5UTR;5UTR;5UTR;5UTR	NT5C2;NT5C2;NT5C2;NT5C2;NT5C2;NT5C2;NT5C2;NT5C2;NT5C2;NT5C2;NT5C2;NT5C2;NT5C2;NT5C2;NT5C2;NT5C2;NT5C2;NT5C2;NT5C2;NT5C2;NT5C2;NT5C2;NT5C2		Promoter_Associated	TRUE
cg26653725_TC11	0.0101024	0.000257481	0.000160464	0.999957	chr17	21284538	chr17:21284240-21285131	Island	TSS200;TSS200;TSS200;TSS200;TSS200;TSS200;TSS200;TSS200;TSS1500	ENSG00000034152.19;ENSG00000034152.19;ENSG00000034152.19;ENSG00000034152.19;ENSG00000034152.19;ENSG00000034152.19;ENSG00000034152.19;ENSG00000034152.19;ENSG00000034152.19		Promoter_Associated	TRUE
cg12343782_TC21	0.204315	0.000258101	0.000160873	0.999957	chr8	27351876		OpenSea			chr8:27351774-27352276		FALSE
cg23850707_TC11	-0.024188	0.000228392	0.000161374	0.999957	chr15	55290296	chr15:55289574-55290373	Island	exon_3;TSS1500;TSS1500;TSS1500;TSS1500;TSS1500;TSS1500	RAB27A;ENSG00000069974.17;ENSG00000069974.17;ENSG00000069974.17;ENSG00000069974.17;ENSG00000069974.17;ENSG00000276533.1		Promoter_Associated	TRUE
cg19262789_BC21	-0.0719515	0.000230722	0.000163103	0.999957	chr14	34846779		OpenSea	TSS1500	ENSG00000251726.1			FALSE
cg13701822_TC11	0.0150203	0.000263553	0.000164471	0.999957	chr17	19004210	chr17:19003596-19004930	Island	exon_1;5UTR;TSS1500	FAM83G;FAM83G;ENSG00000188522.15		Unclassified	TRUE
cg20094435_TC21	0.00851524	0.000264588	0.000165155	0.999957	chr1	192809038	chr1:192808502-192809068	Island	TSS200;TSS200;TSS200;TSS200	ENSG00000116741.8;ENSG00000116741.8;ENSG00000116741.8;ENSG00000116741.8		Promoter_Associated	TRUE
cg14997704_TC21	0.0203681	0.000274186	0.0001715	0.999957	chr8	30384022	chr8:30383900-30385362	Island	TSS1500;TSS1500;TSS1500;TSS1500;TSS1500;TSS1500	ENSG00000157110.16;ENSG00000157110.16;ENSG00000157110.16;ENSG00000157110.16;ENSG00000157110.16;ENSG00000157110.16			FALSE
cg00262757_BC21	0.0610405	0.000274953	0.000172008	0.999957	chr11	47900218		OpenSea				Unclassified	TRUE
cg12960305_TC11	-0.0185082	0.000243436	0.000172553	0.999957	chr4	2792889	chr4:2792767-2793148;chr4:2793412-2793740	Island	TSS200;TSS200;TSS200;TSS1500;TSS1500;TSS1500	ENSG00000087266.17;ENSG00000087266.17;ENSG00000087266.17;ENSG00000087266.17;ENSG00000087266.17;ENSG00000087266.17		Promoter_Associated	TRUE
cg23349111_TC21	-0.0366254	0.00024501	0.000173724	0.999957	chr18	23951182		OpenSea					FALSE
cg02547494_TC21	-0.0424435	0.000245015	0.000173729	0.999957	chr19	12053606	chr19:12052511-12052745	Shore	TSS1500;TSS1500	ENSG00000257355.1;ENSG00000257446.4			FALSE
cg00580354_BC21	0.0796839	0.000278391	0.000174285	0.999957	chr2	178431590		OpenSea	exon_4;exon_3;exon_4;exon_3;exon_4;exon_7;exon_8;exon_4;exon_4;exon_6;exon_5;exon_7;exon_7;exon_8;exon_6;exon_7;exon_8;exon_8;exon_9;exon_9;exon_7;exon_8;exon_8;exon_2;exon_4;exon_6;exon_6;exon_8;exon_6;exon_8;exon_7;3UTR;3UTR;3UTR;3UTR;3UTR;3UTR;3UTR;3UTR;3UTR;3UTR;3UTR;3UTR;3UTR;3UTR;3UTR;3UTR;3UTR;3UTR;5UTR;5UTR	CHROMR;CHROMR;CHROMR;CHROMR;CHROMR;PRKRA;PRKRA;PRKRA;PRKRA;PRKRA;PRKRA;PRKRA;PRKRA;PRKRA;PRKRA;PRKRA;PRKRA;PRKRA;PRKRA;PRKRA;PRKRA;PRKRA;PRKRA;PRKRA;PRKRA;PRKRA;PRKRA;PRKRA;PRKRA;PRKRA;PRKRA;PRKRA;PRKRA;PRKRA;PRKRA;PRKRA;PRKRA;PRKRA;PRKRA;PRKRA;PRKRA;PRKRA;PRKRA;PRKRA;PRKRA;PRKRA;PRKRA;PRKRA;PRKRA;PRKRA;PRKRA			FALSE
cg16531903_TC21	-0.0680586	0.000246602	0.00017491	0.999957	chr10	50886087		OpenSea	TSS1500;TSS1500;TSS1500;TSS1500;TSS1500;TSS1500;TSS1500;TSS1500	ENSG00000148584.15;ENSG00000148584.15;ENSG00000148584.15;ENSG00000148584.15;ENSG00000148584.15;ENSG00000148584.15;ENSG00000148584.15;ENSG00000148584.15			FALSE
cg10914196_BC21	-0.135784	0.000247471	0.000175557	0.999957	chr4	4512091		OpenSea					FALSE
cg01442155_BC21	-0.0147199	0.00024975	0.000177255	0.999957	chr9	3396786		OpenSea	TSS1500;TSS1500	ENSG00000080298.16;ENSG00000080298.16			FALSE
cg16224321_BC21	0.207059	0.000284122	0.000178084	0.999957	chr16	11391066		OpenSea	TSS1500	ENSG00000188897.10			FALSE
cg23241628_BC11	0.0189088	0.000285302	0.000178866	0.999957	chr2	55050907	chr2:55049419-55050908	Island	TSS1500;TSS1500;TSS1500;TSS1500;TSS200;TSS1500	ENSG00000115310.19;ENSG00000115310.19;ENSG00000115310.19;ENSG00000115310.19;ENSG00000115310.19;ENSG00000115310.19			FALSE
cg14412195_BC21	-0.0708824	0.000253051	0.000179715	0.999957	chr18	76965598		OpenSea					FALSE
cg10004563_TC11	0.007085	0.000286994	0.000179989	0.999957	chr19	7463752	chr19:7463725-7463931;chr19:7466924-7467783	Island					FALSE
cg27139783_BC21	0.0468243	0.000288464	0.000180964	0.999957	chr3	125055132	chr3:125055402-125056185	Shore			chr3:125055040-125055176		FALSE
cg19698340_BC22	-0.106561	0.00025886	0.000184049	0.999957	chr17	17943404		OpenSea					FALSE
cg00173787_TC11	-0.0157469	0.000260673	0.000185402	0.999957	chr1	156729069	chr1:156728319-156729124	Island	exon_1;exon_1;exon_1;exon_1;5UTR;5UTR;5UTR;5UTR;TSS1500;TSS1500;TSS1500;TSS1500;TSS1500	METTL25B;METTL25B;METTL25B;METTL25B;METTL25B;METTL25B;METTL25B;METTL25B;ENSG00000143303.12;ENSG00000143319.17;ENSG00000143319.17;ENSG00000143319.17;ENSG00000143319.17		Promoter_Associated	TRUE
cg26987928_TC22	-0.0568418	0.000261531	0.000186043	0.999957	chr15	62475727		OpenSea					FALSE
cg17107275_BC21	-0.178021	0.000262515	0.000186778	0.999957	chr11	131898228		OpenSea	TSS1500	ENSG00000238117.1			FALSE
cg23485239_TC21	-0.0302554	0.000263544	0.000187547	0.999957	chr16	12080405		OpenSea	TSS1500	ENSG00000241641.1		Unclassified_Cell_type_specific	TRUE
cg14066728_TC11	-0.00856069	0.000266488	0.000189747	0.999957	chr4	1712670	chr4:1711540-1713253	Island	TSS1500;TSS1500;TSS1500;TSS1500;TSS1500;TSS1500;TSS200;TSS1500	ENSG00000163950.13;ENSG00000163950.13;ENSG00000163950.13;ENSG00000163950.13;ENSG00000163950.13;ENSG00000163950.13;ENSG00000013810.21;ENSG00000013810.21		Promoter_Associated	TRUE
cg24708182_BC21	0.126728	0.000301804	0.000189831	0.999957	chr3	133990436		OpenSea					FALSE
cg25460807_TC12	0.11582	0.000303762	0.000191135	0.999957	chr8	22050511	chr8:22047950-22048246;chr8:22048823-22049419	Shore					FALSE
cg15834812_TC21	-0.142345	0.000270994	0.000193117	0.999957	chr16	89323160		OpenSea	exon_2;TSS200	ENSG00000261253;ENSG00000261253.2			FALSE
cg14846060_BC11	0.0147175	0.000310132	0.000195378	0.999957	chr10	133378546	chr10:133378090-133379803	Island	TSS1500;TSS1500;TSS1500;TSS1500;TSS1500;TSS1500;TSS1500;TSS1500;TSS1500;TSS1500;TSS1500	ENSG00000148832.16;ENSG00000148832.16;ENSG00000148832.16;ENSG00000148832.16;ENSG00000148832.16;ENSG00000148832.16;ENSG00000148832.16;ENSG00000148832.16;ENSG00000148832.16;ENSG00000254536.2;ENSG00000254536.2			FALSE
cg22540431_BC21	-0.0601165	0.000275754	0.00019668	0.999957	chr6	42322584		OpenSea					FALSE
cg12007207_TC21	0.191124	0.000313682	0.000197745	0.999957	chr11	81970474		OpenSea	TSS1500	ENSG00000254511.1			FALSE
cg12222323_BC21	0.0095145	0.000320846	0.000202527	0.999957	chr17	39688145	chr17:39687859-39688228	Island	exon_1;exon_1;exon_1;5UTR;5UTR;TSS200;TSS200;TSS200;TSS200;TSS200;TSS200;TSS200	ERBB2;ERBB2;ERBB2;ERBB2;ERBB2;ENSG00000161395.14;ENSG00000161395.14;ENSG00000161395.14;ENSG00000161395.14;ENSG00000161395.14;ENSG00000161395.14;ENSG00000161395.14		Promoter_Associated	TRUE
cg14592406_TC11	-0.00896258	0.000285149	0.000203721	0.999957	chr12	120640855	chr12:120640358-120641680	Island	exon_1;TSS1500;TSS1500	CABP1;ENSG00000256008.3;ENSG00000256008.3		Unclassified	TRUE
cg16996416_BC21	0.150053	0.000325414	0.000205579	0.999957	chr5	144458259		OpenSea					FALSE
cg11401682_TC11	-0.00904058	0.000295154	0.000211231	0.999957	chr6	31862839	chr6:31862522-31863171	Island	exon_1;exon_1;exon_1;TSS200;TSS200;TSS200;TSS200	NEU1;NEU1;NEU1;ENSG00000204386.12;ENSG00000204386.12;ENSG00000204386.12;ENSG00000204386.12		Promoter_Associated	TRUE
cg02122551_TC21	0.0664879	0.000334129	0.000211409	0.999957	chr1	232788565		OpenSea					FALSE
cg13607248_BC11	-0.0191688	0.000296756	0.000212435	0.999957	chr3	184156768		OpenSea	TSS200	ENSG00000161202.20		Promoter_Associated	TRUE
cg17328790_TC21	0.0200562	0.000338765	0.000214514	0.999957	chr6	99350069	chr6:99349332-99350070	Island	TSS1500;TSS200	ENSG00000146267.12;ENSG00000146267.12			FALSE
cg02095108_BC21	0.0300691	0.000339247	0.000214837	0.999957	chr1	230254788		OpenSea	TSS1500	ENSG00000143641.10			FALSE
cg09066361_BC21	0.270438	0.000339975	0.000215325	0.999957	chr7	127250200	chr7:127251246-127254151	Shore					FALSE
cg13746207_BC21	0.448223	0.000340615	0.000215753	0.999957	chr11	78034630		OpenSea					FALSE
cg16310595_BC21	-0.092533	0.000301523	0.000216019	0.999957	chr11	47918642		OpenSea					FALSE
cg10989716_BC11	-0.00656807	0.000303737	0.000217684	0.999957	chr12	81758854	chr12:81758541-81758895	Island	TSS200;TSS200;TSS1500;TSS1500	ENSG00000139220.17;ENSG00000139220.17;ENSG00000139220.17;ENSG00000139220.17		Unclassified_Cell_type_specific	TRUE
cg14486957_TC21	0.11567	0.000345738	0.000219188	0.999957	chr19	35524662		OpenSea					FALSE
cg12317664_BC21	-0.0651885	0.00030605	0.000219424	0.999957	chr8	96386856		OpenSea	TSS1500	ENSG00000253105.6			FALSE
cg13920818_BC11	0.0170949	0.000347202	0.000220171	0.999957	chr18	12884518	chr18:12883286-12884579	Island	TSS200;TSS1500;TSS1500;TSS1500;TSS1500;TSS1500;TSS1500;TSS1500;TSS1500;TSS1500	ENSG00000175354.20;ENSG00000175354.20;ENSG00000175354.20;ENSG00000175354.20;ENSG00000175354.20;ENSG00000175354.20;ENSG00000175354.20;ENSG00000175354.20;ENSG00000175354.20;ENSG00000175354.20			FALSE
cg20661643_BC21	0.11823	0.000348255	0.000220878	0.999957	chr15	77862451		OpenSea					FALSE
cg01608304_BC21	0.127136	0.000348611	0.000221117	0.999957	chr16	13454027		OpenSea					FALSE
cg11590833_BC21	0.106811	0.000349471	0.000221694	0.999957	chr15	34621339		OpenSea					FALSE
cg24375257_BC21	-0.023141	0.000309562	0.000222068	0.999957	chr11	16607742	chr11:16604506-16605677;chr11:16606856-16607633;chr11:16610961-16611178	Shore	TSS200	ENSG00000110693.19			FALSE
cg07479092_BC11	-0.00972657	0.000310857	0.000223044	0.999957	chr5	58460712	chr5:58459507-58460976	Island	TSS1500;TSS1500;TSS1500;TSS1500;TSS1500	ENSG00000145632.15;ENSG00000145632.15;ENSG00000145632.15;ENSG00000145632.15;ENSG00000145632.15		Promoter_Associated	TRUE
cg25872160_BC21	0.138307	0.000351656	0.00022316	0.999957	chr21	39802156		OpenSea					FALSE
cg01579603_BC21	0.091966	0.000353045	0.000224093	0.999957	chr1	168499899		OpenSea					FALSE
cg27370402_TC21	-0.103892	0.000314824	0.000226033	0.999957	chr14	69626544		OpenSea					FALSE
cg03177059_TC11	0.00948507	0.000360066	0.000228811	0.999957	chr13	23889122	chr13:23888980-23889538	Island	exon_1;TSS1500	MIPEP;ENSG00000205861.13		Promoter_Associated	TRUE
cg24443172_TC21	0.0530949	0.000360589	0.000229163	0.999957	chr2	229232161		OpenSea	TSS200	ENSG00000153823.19			FALSE
cg00805552_TC21	0.06545	0.000361428	0.000229727	0.999957	chr18	56964078		OpenSea					FALSE
cg17156897_BC21	0.064815	0.000363931	0.000231411	0.999957	chr11	43411124		OpenSea					FALSE
cg04198125_TC11	0.00712253	0.00036506	0.000232171	0.999957	chr7	157419083	chr7:157416100-157416314;chr7:157418866-157419111;chr7:157422307-157422554	Island				Unclassified_Cell_type_specific	TRUE
cg06460294_BC21	-0.186153	0.000324604	0.000233409	0.999957	chr2	121080787		OpenSea					FALSE
cg08012587_TC21	0.134822	0.00036692	0.000233422	0.999957	chr5	57450974		OpenSea					FALSE
cg10085977_TC21	0.0682392	0.000368146	0.000234247	0.999957	chr1	26828008	chr1:26826739-26827183	Shore			chr1:26827994-26828280		FALSE
cg10403906_BC21	0.0175846	0.000368226	0.000234302	0.999957	chr6	31729503	chr6:31728117-31728953;chr6:31729752-31730468	Shore	exon_1;TSS1500;TSS200;TSS1500	DDAH2;ENSG00000213722.10;ENSG00000213722.10;ENSG00000213722.10		Promoter_Associated	TRUE
cg15031699_BC21	0.0177933	0.000370379	0.000235751	0.999957	chr11	114378190		OpenSea					FALSE
cg17336204_TC11	0.0123214	0.000371576	0.000236557	0.999957	chr20	46308633	chr20:46307293-46308671;chr20:46312518-46312931	Island	TSS200	ENSG00000149654.11			FALSE
cg10500167_BC21	0.118015	0.000373891	0.000238117	0.999957	chr3	10450794		OpenSea	TSS1500;TSS1500;TSS1500;TSS1500;TSS1500	ENSG00000157087.20;ENSG00000157087.20;ENSG00000157087.20;ENSG00000157087.20;ENSG00000157087.20			FALSE
cg14390539_BC21	-0.0292059	0.000336343	0.000242278	0.999957	chr9	133246598		OpenSea					FALSE
cg09328470_TC21	0.0321942	0.000380474	0.000242555	0.999957	chr5	56862267		OpenSea	TSS200	ENSG00000237705.1			FALSE
cg22807015_TC21	-0.0360036	0.000337003	0.000242777	0.999957	chr10	33116831		OpenSea	TSS200;TSS200	ENSG00000233387.3;ENSG00000233387.3			FALSE
cg12911417_TC21	-0.103749	0.000337334	0.000243028	0.999957	chr9	90900344		OpenSea				Unclassified_Cell_type_specific	TRUE
cg03592940_BC11	-0.0181245	0.000338939	0.000244241	0.999957	chr2	73926769	chr2:73926726-73927154	Island	TSS200;TSS200;TSS200;TSS200;TSS200;TSS200;TSS200;TSS200	ENSG00000114956.20;ENSG00000114956.20;ENSG00000114956.20;ENSG00000114956.20;ENSG00000114956.20;ENSG00000114956.20;ENSG00000114956.20;ENSG00000114956.20		Promoter_Associated	TRUE
cg16336446_BC21	-0.0477566	0.000339691	0.00024481	0.999957	chr1	107689789		OpenSea	TSS1500;TSS1500;TSS1500;TSS1500	ENSG00000134215.16;ENSG00000134215.16;ENSG00000134215.16;ENSG00000134215.16			FALSE
cg22563064_TC21	0.016396	0.000384452	0.000245239	0.999957	chr17	43170962	chr17:43170955-43171346	Island	exon_1;exon_1;TSS1500;TSS1500;TSS1500;TSS1500;TSS1500;TSS1500;TSS1500;TSS1500;TSS1500;TSS1500	ENSG00000267002;ENSG00000267002;ENSG00000012048.24;ENSG00000267002.4;ENSG00000267002.4;ENSG00000267340.1;ENSG00000188554.15;ENSG00000188554.15;ENSG00000188554.15;ENSG00000188554.15;ENSG00000267002.4;ENSG00000267002.4		Promoter_Associated	TRUE
cg00480078_TC21	0.0639659	0.000386531	0.000246643	0.999957	chr11	60759652		OpenSea					FALSE
cg20552236_TC21	-0.0498329	0.000342803	0.000247165	0.999957	chr15	74798617		OpenSea	exon_3;exon_4;exon_2;exon_2;exon_3;exon_5;exon_2;exon_1;5UTR;TSS200;TSS1500	CSK;CSK;CSK;CSK;CSK;CSK;CSK;CSK;CSK;ENSG00000103653.17;ENSG00000103653.17			FALSE
cg04705229_TC21	-0.119715	0.000343201	0.000247466	0.999957	chr2	23548489		OpenSea					FALSE
cg17522463_BC21	0.094652	0.000388288	0.000247829	0.999957	chr1	46568629		OpenSea	exon_8;TSS200;TSS200	MKNK1-AS1;ENSG00000079277.22;ENSG00000079277.22			FALSE
cg07391577_BC21	0.0439961	0.000389805	0.000248854	0.999957	chr2	153354528		OpenSea					FALSE
cg19058045_TC11	-0.013131	0.000347077	0.000250401	0.999957	chr9	92325714	chr9:92325667-92326324	Island	TSS1500;TSS200;TSS200;TSS1500;TSS1500;TSS1500;TSS1500;TSS1500;TSS1500;TSS1500;TSS1500;TSS200;TSS1500;TSS1500;TSS1500;TSS200;TSS1500;TSS1500;TSS1500;TSS1500;TSS1500;TSS1500;TSS1500;TSS1500;TSS1500;TSS1500	ENSG00000198000.12;ENSG00000198000.12;ENSG00000198000.12;ENSG00000198000.12;ENSG00000198000.12;ENSG00000198000.12;ENSG00000198000.12;ENSG00000198000.12;ENSG00000198000.12;ENSG00000198000.12;ENSG00000198000.12;ENSG00000198000.12;ENSG00000198000.12;ENSG00000198000.12;ENSG00000198000.12;ENSG00000198000.12;ENSG00000198000.12;ENSG00000198000.12;ENSG00000198000.12;ENSG00000198000.12;ENSG00000198000.12;…		Promoter_Associated	TRUE
cg22662602_BC11	-0.0111575	0.000347511	0.00025073	0.999957	chr16	47461446	chr16:47460786-47461296	Shore	TSS1500;TSS200;TSS1500;TSS1500	ENSG00000129636.13;ENSG00000129636.13;ENSG00000102893.18;ENSG00000102893.18		Promoter_Associated	TRUE
cg20933545_BC21	-0.323346	0.000347778	0.000250932	0.999957	chr16	492029		OpenSea					FALSE
cg27531571_BC21	-0.267745	0.000350321	0.000252859	0.999957	chr17	79931361	chr17:79927266-79927534;chr17:79930105-79930598	Shore				Unclassified_Cell_type_specific	TRUE
cg08892911_BC21	-0.0693924	0.000351312	0.000253609	0.999957	chr5	172666372	chr5:172669728-172670383	Shelf					FALSE
cg14041153_TC11	0.0111245	0.000398282	0.000254584	0.999957	chr9	96450196	chr9:96449882-96451225	Island	exon_1;5UTR;TSS200	HABP4;HABP4;ENSG00000130956.14		Promoter_Associated	TRUE
cg25016906_BC21	-0.0107872	0.000353127	0.000254985	0.999957	chr15	67521915	chr15:67521032-67521843	Shore	exon_1;exon_1;exon_1;5UTR;TSS1500;TSS200;TSS1500;TSS1500;TSS1500;TSS1500;TSS1500	C15orf61;C15orf61;C15orf61;C15orf61;ENSG00000259673.6;ENSG00000259673.6;ENSG00000259673.6;ENSG00000259673.6;ENSG00000259673.6;ENSG00000259673.6;ENSG00000259673.6		Promoter_Associated	TRUE
cg07261914_TC21	-0.0686102	0.000353693	0.000255414	0.999957	chr4	156349172		OpenSea					FALSE
cg19702271_BC21	0.141793	0.000399651	0.000255509	0.999957	chr6	46735758	chr6:46734999-46735579	Shore	TSS1500;TSS200	ENSG00000146070.17;ENSG00000146070.17			FALSE
cg03896078_TC21	0.0247389	0.000402225	0.000257251	0.999957	chr10	14008592		OpenSea	TSS200;TSS200	ENSG00000151474.23;ENSG00000151474.23			FALSE
cg23669876_BC21	-0.0519982	0.000357954	0.000258645	0.999957	chr1	36023675		OpenSea			chr1:36023471-36023817	Unclassified_Cell_type_specific	TRUE
cg24129291_BC21	-0.190445	0.000362141	0.000261821	0.999957	chr19	11620575		OpenSea					FALSE
cg12456280_TC11	0.0366456	0.000410127	0.000262601	0.999957	chr4	1598345	chr4:1598982-1599333	Shore					FALSE
cg26484019_BC21	-0.0319127	0.000363181	0.00026261	0.999957	chr22	46731115		OpenSea					FALSE
cg24394990_TC21	-0.163673	0.00036414	0.000263338	0.999957	chr1	87327681	chr1:87328119-87329459	Shore	TSS1500;TSS1500	ENSG00000143013.13;ENSG00000143013.13			FALSE
cg16273165_BC21	0.0525413	0.000411909	0.000263809	0.999957	chr11	45226643		OpenSea	exon_8;exon_8	PRDM11;PRDM11			FALSE
cg20712631_BC21	-0.175473	0.000364773	0.000263819	0.999957	chr5	172647062		OpenSea				Unclassified_Cell_type_specific	TRUE
cg08527776_BC21	-0.15375	0.000367892	0.000266187	0.999957	chr5	132675242		OpenSea				Unclassified_Cell_type_specific	TRUE
cg01280867_BC21	-0.0458711	0.000368855	0.000266919	0.999957	chr19	42120884		OpenSea					FALSE
cg03229896_TC11	-0.0210338	0.000370558	0.000268212	0.999957	chr6	52279487		OpenSea	exon_4;exon_5;exon_5;exon_4;TSS200	MCM3;MCM3;MCM3;MCM3;ENSG00000112118.20			FALSE
cg00323631_BC21	0.011283	0.000418485	0.000268267	0.999957	chr4	98929217	chr4:98928154-98929401	Island	TSS200;TSS200;TSS200;TSS200;TSS200;TSS200;TSS200;TSS200;TSS200	ENSG00000151247.13;ENSG00000151247.13;ENSG00000151247.13;ENSG00000151247.13;ENSG00000151247.13;ENSG00000151247.13;ENSG00000151247.13;ENSG00000151247.13;ENSG00000151247.13		Promoter_Associated	TRUE
cg04987343_BC21	-0.233987	0.000370744	0.000268353	0.999957	chr3	58507388		OpenSea					FALSE
cg11582653_BC21	0.0927204	0.000419161	0.000268725	0.999957	chr4	38949410		OpenSea			chr4:38949271-38949625		FALSE
cg22422090_TC21	0.184248	0.000421435	0.000270268	0.999957	chr5	137689035		OpenSea					FALSE
cg07324083_TC21	0.031613	0.000421632	0.000270402	0.999957	chr1	198621146		OpenSea			chr1:198620979-198621488	Promoter_Associated	TRUE
cg18807111_BC21	0.0196794	0.000421863	0.000270559	0.999957	chr1	200008694		OpenSea	TSS200	ENSG00000202491.1			FALSE
cg07531769_TC21	0.0926729	0.00042198	0.000270638	0.999957	chr3	167895041		OpenSea	TSS1500;TSS1500;TSS1500;TSS1500;TSS1500	ENSG00000244227.9;ENSG00000244227.9;ENSG00000244227.9;ENSG00000244227.9;ENSG00000244227.9			FALSE
cg02501186_BC21	0.0227426	0.00042302	0.000271344	0.999957	chr17	74873806	chr17:74872797-74873578	Shore	TSS1500;TSS1500;TSS1500;TSS1500;TSS1500;TSS1500;TSS1500;TSS1500;TSS1500;TSS1500;TSS1500;TSS1500;TSS1500;TSS1500;TSS1500;TSS1500;TSS1500	ENSG00000161513.12;ENSG00000161513.12;ENSG00000161513.12;ENSG00000161513.12;ENSG00000161513.12;ENSG00000161513.12;ENSG00000161513.12;ENSG00000161513.12;ENSG00000161513.12;ENSG00000161513.12;ENSG00000161513.12;ENSG00000161513.12;ENSG00000161513.12;ENSG00000161513.12;ENSG00000161513.12;ENSG00000161513.12;ENSG00000161513.12		Promoter_Associated	TRUE
cg14995876_BC21	-0.0285482	0.000375146	0.000271699	0.999957	chr10	44971843	chr10:44974574-44974843;chr10:44975073-44975285	Shelf	exon_2;exon_3;exon_3;exon_3;exon_2;exon_2;exon_1	RASSF4;RASSF4;RASSF4;RASSF4;RASSF4;RASSF4;RASSF4			FALSE
cg11915303_BC21	0.0263937	0.000424113	0.000272085	0.999957	chr7	151611330		OpenSea					FALSE
cg02629603_TC21	0.131932	0.000429236	0.000275564	0.999957	chr2	240232792		OpenSea				Unclassified	TRUE
cg14599113_BC21	0.0515146	0.000429242	0.000275568	0.999957	chr11	122021468		OpenSea					FALSE
cg15647325_TC21	-0.144144	0.00038057	0.000275824	0.999957	chr6	134467666		OpenSea					FALSE
cg18121641_BC21	-0.0973343	0.000380813	0.000276009	0.999957	chr15	70698884		OpenSea					FALSE
cg15150659_TC21	0.0616201	0.000433667	0.000278575	0.999957	chr11	118154328	chr11:118152637-118153479	Shore	TSS1500	ENSG00000177098.9			FALSE
cg23851297_TC21	0.0140191	0.00043497	0.00027946	0.999957	chr5	119071332	chr5:119071049-119071747	Island	exon_1;5UTR;TSS1500;TSS1500;TSS200;TSS200	DMXL1;DMXL1;ENSG00000249494.6;ENSG00000249494.6;ENSG00000172869.15;ENSG00000172869.15		Promoter_Associated	TRUE
cg25087659_BC21	-0.14777	0.000386937	0.000280669	0.999957	chr20	24577781		OpenSea					FALSE
cg07915884_BC21	0.156736	0.000436984	0.00028083	0.999957	chr1	245310746		OpenSea				Promoter_Associated_Cell_type_specific	TRUE
cg07787450_BC21	0.0633993	0.000437907	0.000281457	0.999957	chr20	62774262	chr20:62771955-62772241	Shelf	exon_3;exon_3;exon_3;exon_3;exon_2;exon_3;exon_3;exon_3;exon_2;exon_3	LINC00659;LINC00659;LINC00659;LINC00659;LINC00659;LINC00659;LINC00659;LINC00659;LINC00659;LINC00659			FALSE
cg18334412_TC11	0.0071581	0.0004399	0.000282813	0.999957	chr2	152098692	chr2:152098119-152099270	Island	exon_1;exon_1;exon_1;exon_1;exon_1;5UTR;5UTR;5UTR;5UTR;5UTR;TSS1500;TSS200	CACNB4;CACNB4;CACNB4;CACNB4;CACNB4;CACNB4;CACNB4;CACNB4;CACNB4;CACNB4;ENSG00000182389.20;ENSG00000182389.20		Unclassified_Cell_type_specific	TRUE
cg06749872_TC11	0.0083967	0.000440201	0.000283018	0.999957	chr16	30187188	chr16:30183426-30184036	Shelf	exon_5;exon_5;exon_4;exon_6;exon_5;exon_4;exon_2;exon_2;exon_1;TSS1500	CORO1A;CORO1A;CORO1A;CORO1A;CORO1A;CORO1A;CORO1A;CORO1A;CORO1A;ENSG00000102879.17		Promoter_Associated	TRUE
cg16934374_BC21	0.0904332	0.000441254	0.000283734	0.999957	chr13	31968756		OpenSea				Unclassified_Cell_type_specific	TRUE
cg20876215_TC21	0.0622176	0.000444414	0.000285884	0.999957	chr2	112658334		OpenSea	TSS200	ENSG00000144136.11			FALSE
cg17235374_BC11	0.00876698	0.000446144	0.000287062	0.999957	chr17	29390739	chr17:29390117-29391019	Island	exon_1;exon_1;5UTR;TSS1500;TSS1500;TSS200;TSS200	ENSG00000264808;TAOK1;TAOK1;ENSG00000264808.2;ENSG00000264808.2;ENSG00000160551.12;ENSG00000160551.12			FALSE
cg01872290_BC11	-0.0101811	0.000395899	0.000287497	0.999957	chr5	154755793	chr5:154754579-154757449	Island	exon_1;TSS200;TSS1500;TSS1500;TSS1500;TSS1500	LARP1;ENSG00000155506.19;ENSG00000155506.19;ENSG00000155506.19;ENSG00000155506.19;ENSG00000155506.19			FALSE
cg02637982_TC21	0.0961522	0.000449064	0.00028905	0.999957	chr3	55350970		OpenSea	TSS200	ENSG00000242568.1			FALSE
cg20808464_TC21	0.12265	0.000449389	0.000289272	0.999957	chr13	85279267		OpenSea					FALSE
cg10019429_TC11	0.00453729	0.000450331	0.000289913	0.999957	chr19	32345753	chr19:32345447-32345934	Island	exon_1;exon_1;exon_1;exon_1;5UTR;5UTR;5UTR	ZNF507;ZNF507;ZNF507;ZNF507;ZNF507;ZNF507;ZNF507		Promoter_Associated	TRUE
cg16219336_TC21	0.138327	0.000453697	0.000292207	0.999957	chr11	37978913		OpenSea					FALSE
cg05644889_TC21	-0.0723654	0.000404297	0.000293901	0.999957	chr1	45912314		OpenSea	TSS1500;TSS1500	ENSG00000086015.23;ENSG00000086015.23			FALSE
cg18219522_TC21	-0.203798	0.000404839	0.000294315	0.999957	chr11	96137250		OpenSea					FALSE
cg01389234_BC21	-0.157784	0.000406917	0.000295901	0.999957	chr3	114451621		OpenSea					FALSE
cg09902181_TC21	0.0761735	0.000462687	0.000298336	0.999957	chr6	104579651		OpenSea					FALSE
cg09011833_BC21	-0.019939	0.000411773	0.000299608	0.999957	chr5	51379280	chr5:51382798-51383381	Shelf	exon_1	ISL1-DT			FALSE
cg02190678_TC11	-0.00970578	0.00041259	0.000300232	0.999957	chr16	31077819	chr16:31074203-31074727;chr16:31080068-31080475	Shelf	exon_2;exon_1	ZNF646;ZNF646			FALSE
cg01831751_BC21	0.199736	0.000467515	0.00030163	0.999957	chr18	30192113		OpenSea					FALSE
cg15893929_BC11	0.0940748	0.000467707	0.000301762	0.999957	chr17	3851896		OpenSea					FALSE
cg05528916_TC21	0.013087	0.000470505	0.000303672	0.999957	chr11	10934079	chr11:10930803-10931525	Shelf				Unclassified_Cell_type_specific	TRUE
cg13498852_BC21	-0.0861724	0.000422546	0.00030784	0.999957	chr1	203630530	chr1:203629343-203629725	Shore					FALSE
cg10454912_BC21	0.0271984	0.000477862	0.000308698	0.999957	chr2	44940230	chr2:44942366-44944745;chr2:44937422-44939428	Shore	exon_1;exon_2;exon_2;TSS1500;TSS1500;exon_1;TSS1500	ENSG00000276670;SIX3-AS1;SIX3-AS1;ENSG00000259439.3;ENSG00000259439.3;SIX3-AS1;ENSG00000138083.5			FALSE
cg09729166_BC21	-0.03292	0.000424235	0.000309132	0.999957	chr11	3166359	chr11:3164901-3165538	Shore	TSS1500;TSS1500;TSS1500;TSS1500;TSS1500;TSS1500;TSS1500;TSS1500	ENSG00000021762.20;ENSG00000021762.20;ENSG00000021762.20;ENSG00000021762.20;ENSG00000021762.20;ENSG00000021762.20;ENSG00000021762.20;ENSG00000021762.20			FALSE
cg05105226_BC21	-0.0577674	0.000426696	0.000311014	0.999957	chr5	138903265		OpenSea	TSS1500	ENSG00000044115.21			FALSE
cg19198568_TC21	0.0195461	0.0004847	0.000313374	0.999957	chr7	28958250	chr7:28955615-28958925	Island	exon_1;5UTR	TRIL;TRIL			FALSE
cg05887390_TC21	0.0326583	0.000488073	0.000315681	0.999957	chr7	128885608		OpenSea					FALSE
cg19546091_TC21	-0.0381878	0.000433977	0.000316587	0.999957	chr17	39663297		OpenSea	exon_14;exon_15;exon_14;exon_14;exon_6;exon_9;exon_7;exon_6;3UTR;3UTR;3UTR	STARD3;STARD3;STARD3;STARD3;STARD3;STARD3;STARD3;STARD3;STARD3;STARD3;STARD3			FALSE
cg04790936_TC11	-0.00820462	0.000434749	0.000317178	0.999957	chr22	37639746	chr22:37639343-37639921	Island	exon_2;exon_1;exon_1;exon_1;5UTR;5UTR;5UTR;TSS1500	SH3BP1;SH3BP1;SH3BP1;ENSG00000285304;SH3BP1;ENSG00000285304;SH3BP1;ENSG00000100092.24		Promoter_Associated	TRUE
cg02499974_TC21	0.0847976	0.000490339	0.000317233	0.999957	chr12	117674492		OpenSea					FALSE
cg19887993_BC21	0.0918563	0.000492244	0.000318537	0.999957	chr14	94536941		OpenSea					FALSE
cg01416741_TC21	0.0178359	0.000493841	0.000319631	0.999957	chr19	38631594		OpenSea	TSS1500	ENSG00000178982.10			FALSE
cg02996181_TC21	0.137363	0.000494259	0.000319916	0.999957	chr11	417643	chr11:416419-417650;chr11:420265-421747	Island	TSS1500;TSS1500;TSS200	ENSG00000185187.13;ENSG00000185187.13;ENSG00000185187.13			FALSE
cg09805254_BC21	0.111139	0.000494872	0.000320336	0.999957	chr6	164099641		OpenSea					FALSE
cg21461358_TC21	-0.0285612	0.000441815	0.000322591	0.999957	chr16	48444748		OpenSea					FALSE
cg08773078_TC21	-0.0959714	0.000442143	0.000322842	0.999957	chr16	89552765		OpenSea	exon_1;exon_1	SPG7;SPG7			FALSE
cg23615276_BC21	-0.041511	0.000442431	0.000323063	0.999957	chr18	58827840		OpenSea			chr18:58827578-58827879		FALSE
cg18676839_BC21	-0.0497341	0.000444552	0.000324688	0.999957	chr13	43379624		OpenSea					FALSE
cg11175099_TC21	0.0769784	0.000501405	0.000324812	0.999957	chr4	107433827		OpenSea	TSS1500	ENSG00000252470.1			FALSE
cg07902348_BC21	0.0248221	0.00050221	0.000325364	0.999957	chr5	151194676		OpenSea					FALSE
cg27490352_BC11	-0.00865703	0.000446534	0.000326208	0.999957	chr17	65057236	chr17:65055775-65057237	Island	TSS1500;TSS1500	ENSG00000120063.10;ENSG00000120063.10		Promoter_Associated	TRUE
cg02101285_BC21	-0.0463682	0.000447153	0.000326683	0.999957	chr1	77309394		OpenSea				Unclassified_Cell_type_specific	TRUE
cg03089615_BC21	-0.120106	0.0004479	0.000327256	0.999957	chr2	85546540		OpenSea	exon_15;3UTR	GGCX;GGCX			FALSE
cg20102955_BC21	0.0742573	0.00050643	0.000328258	0.999957	chr8	132024446		OpenSea	exon_14;exon_18;3UTR;3UTR	OC90;ENSG00000258417;OC90;ENSG00000258417			FALSE
cg25630178_TC11	0.0681972	0.00050899	0.000330014	0.999957	chr21	9129729	chr21:9129431-9129787	Island	exon_1;exon_1;exon_1;exon_1;exon_1;exon_1;exon_1;exon_1;exon_1;exon_1;exon_1;exon_1;exon_1;exon_1;exon_1;exon_1;exon_1;exon_1;exon_1;exon_1;exon_1;exon_1;exon_1;exon_1;exon_1;exon_1;exon_1;exon_1;exon_1;TSS200	TEKT4P2;TEKT4P2;TEKT4P2;TEKT4P2;TEKT4P2;TEKT4P2;TEKT4P2;TEKT4P2;TEKT4P2;TEKT4P2;TEKT4P2;TEKT4P2;TEKT4P2;TEKT4P2;TEKT4P2;TEKT4P2;TEKT4P2;TEKT4P2;TEKT4P2;TEKT4P2;TEKT4P2;TEKT4P2;TEKT4P2;TEKT4P2;TEKT4P2;TEKT4P2;TEKT4P2;TEKT4P2;TEKT4P2;ENSG00000188681.13			FALSE
cg15868955_TC21	-0.105976	0.000451975	0.000330381	0.999957	chr16	69348461		OpenSea	TSS200	ENSG00000157315.5			FALSE
cg22794919_TC21	-0.0654277	0.000452785	0.000331002	0.999957	chr17	62753138		OpenSea					FALSE
cg17910407_BC21	0.235258	0.000512569	0.000332469	0.999957	chr1	230368528		OpenSea					FALSE
cg17540096_BC21	-0.0543008	0.000459087	0.000335839	0.999957	chr21	45152613		OpenSea				Promoter_Associated	TRUE
cg05717204_TC11	-0.0068811	0.000460515	0.000336936	0.999957	chr3	46883278	chr3:46881339-46883692	Island	TSS1500;TSS1500;TSS1500;TSS200;TSS200	ENSG00000160808.11;ENSG00000160808.11;ENSG00000160808.11;ENSG00000160801.14;ENSG00000160801.14		Unclassified_Cell_type_specific	TRUE
cg14415166_BC11	0.00871213	0.00052048	0.000337901	0.999957	chr1	51729611	chr1:51729356-51730149	Island	exon_1;5UTR;TSS200;TSS1500;TSS1500;TSS1500;TSS1500;TSS1500;TSS1500;TSS1500	OSBPL9;OSBPL9;ENSG00000117859.19;ENSG00000117859.19;ENSG00000117859.19;ENSG00000117859.19;ENSG00000117859.19;ENSG00000117859.19;ENSG00000117859.19;ENSG00000117859.19		Promoter_Associated	TRUE
cg04184330_BC21	-0.0339272	0.000462141	0.000338184	0.999957	chr5	9380390		OpenSea	TSS200;TSS1500	ENSG00000112902.12;ENSG00000112902.12			FALSE
cg18373141_TC21	0.110152	0.000523061	0.000339674	0.999957	chr4	100129931		OpenSea					FALSE
cg27426824_BC21	-0.0527336	0.000468068	0.000342738	0.999957	chr10	68667173		OpenSea	exon_7	TET1			FALSE
cg27634845_TC21	0.14561	0.000530667	0.000344902	0.999957	chr1	90358258		OpenSea					FALSE
cg17744997_TC21	-0.0792504	0.000472295	0.000345987	0.999957	chr6	166988123		OpenSea				Unclassified_Cell_type_specific	TRUE
cg14924106_TC21	0.0895406	0.000532944	0.000346467	0.999957	chr10	36779226		OpenSea					FALSE
cg17684509_TC11	-0.0570446	0.000474126	0.000347395	0.999957	chr12	57276835		OpenSea					FALSE
cg00240205_TC21	0.0662053	0.000535833	0.000348455	0.999957	chr2	69222983		OpenSea					FALSE
cg16291265_TC21	-0.18402	0.000476175	0.000348971	0.999957	chr5	174583939		OpenSea					FALSE
cg06929845_BC21	-0.0494026	0.000476373	0.000349123	0.999957	chr11	17226099		OpenSea					FALSE
cg00059479_BC21	0.099253	0.000537445	0.000349564	0.999957	chr1	2374786	chr1:2372720-2372937	Shore					FALSE
cg17450814_TC21	-0.158702	0.000477345	0.000349871	0.999957	chr13	80277125		OpenSea					FALSE
cg00695560_BC11	-0.00730522	0.000477989	0.000350366	0.999957	chr13	99501416	chr13:99498438-99498766;chr13:99501111-99501884	Island	exon_5;exon_3;5UTR;5UTR;TSS200;TSS1500	TM9SF2;TM9SF2;TM9SF2;TM9SF2;ENSG00000125304.10;ENSG00000203441.2		Unclassified	TRUE
cg00137234_TC21	-0.263651	0.000479989	0.000351905	0.999957	chr4	154781986	chr4:154781188-154782176	Island	TSS200	ENSG00000249041.1			FALSE
cg09936441_TC21	0.110856	0.000542091	0.000352763	0.999957	chr20	15923174		OpenSea					FALSE
cg15977904_BC21	0.0851786	0.00054565	0.000355213	0.999957	chr22	48493128	chr22:48489072-48491231	Shore				Unclassified	TRUE
cg07914822_BC21	-0.0331257	0.000487694	0.000357835	0.999957	chr20	62476739	chr20:62474273-62476841	Island	TSS1500;TSS1500	ENSG00000130700.7;ENSG00000272050.1			FALSE
cg03648666_BC21	-0.0742275	0.000488537	0.000358485	0.999957	chr3	71107968		OpenSea					FALSE
cg13905418_BC21	0.174445	0.000555121	0.00036174	0.999957	chr9	90107455		OpenSea	TSS1500	ENSG00000278382.1			FALSE
cg07657332_TC21	-0.0707996	0.00049426	0.000362893	0.999957	chr10	52884113		OpenSea					FALSE
cg04235540_TC21	0.114658	0.000561799	0.000366346	0.999957	chr9	128393735	chr9:128392067-128393644	Shore	TSS1500;TSS1500	ENSG00000207955.5;ENSG00000284185.1			FALSE
cg05864271_BC21	-0.0369691	0.000499031	0.00036657	0.999957	chr4	162740296		OpenSea	TSS200;TSS200;TSS1500	ENSG00000248431.2;ENSG00000248431.2;ENSG00000248431.2			FALSE
cg04109230_TC21	-0.0128046	0.000500766	0.000367908	0.999957	chr2	136118186	chr2:136116516-136118454;chr2:136119141-136119481	Island	TSS1500;TSS200;TSS200;TSS1500;TSS1500	ENSG00000121966.8;ENSG00000121966.8;ENSG00000121966.8;ENSG00000121966.8;ENSG00000289974.1			FALSE
cg19285958_BC21	-0.110596	0.000504322	0.00037065	0.999957	chr4	20248578	chr4:20251653-20255245	Shelf					FALSE
cg22197918_BC21	-0.0475812	0.000504748	0.000370979	0.999957	chr17	12043376		OpenSea					FALSE
cg07266350_TC21	-0.0515763	0.000506486	0.00037232	0.999957	chr3	49423088		OpenSea	exon_6;exon_1;exon_1;exon_4;exon_4;exon_6;exon_1;exon_6;exon_7;exon_7;3UTR;3UTR;3UTR;3UTR;5UTR;5UTR;TSS1500;TSS1500;TSS1500;TSS1500;TSS1500;TSS1500;TSS1500;TSS1500;TSS1500;TSS1500;TSS1500;TSS1500;TSS1500;TSS1500;TSS1500;TSS1500;TSS1500;TSS1500;TSS1500;TSS1500;TSS1500;TSS1500;TSS1500;TSS1500;TSS1500;TSS1500;TSS1500;TSS1500;TSS1500;TSS1500;TSS1500;TSS1500;TSS1500;TSS1500;TSS1500;TSS1500;TSS1500;TSS…	ENSG00000283189;ENSG00000283189;ENSG00000283189;ENSG00000283189;ENSG00000283189;ENSG00000283189;ENSG00000283189;NICN1;NICN1;NICN1;NICN1;NICN1;NICN1;ENSG00000283189;ENSG00000283189;ENSG00000283189;ENSG00000145020.16;ENSG00000145020.16;ENSG00000145020.16;ENSG00000145020.16;ENSG00000145020.16;ENSG00000145020.16;ENSG00000145020.16;ENSG00000145020.16;ENSG00000145020.16;ENSG00000145020.16;ENSG000001450…			FALSE
cg17761526_BC21	-0.0678952	0.000509484	0.000374633	0.999957	chr14	61839787		OpenSea					FALSE
cg03327257_BC21	0.0965403	0.000575606	0.000375878	0.999957	chr5	145529891		OpenSea					FALSE
cg18755114_TC11	-0.00976496	0.000512247	0.000376765	0.999957	chr2	208254306	chr2:208254154-208254527;chr2:208255168-208255585	Island	exon_1;exon_1;5UTR;5UTR;TSS1500;TSS1500	IDH1;IDH1;IDH1;IDH1;ENSG00000231908.2;ENSG00000231908.2		Promoter_Associated	TRUE
cg07366196_TC11	0.0125458	0.000578934	0.000378178	0.999957	chr12	127381281		OpenSea				Unclassified	TRUE
cg11786224_TC21	0.150908	0.000580444	0.000379222	0.999957	chr11	61496253		OpenSea	TSS200	ENSG00000255931.2			FALSE
cg21914795_TC21	0.0462735	0.000582374	0.000380556	0.999957	chr11	134259165		OpenSea	exon_4;TSS200	ACAD8;ENSG00000151498.12			FALSE
cg05451475_BC21	-0.0448857	0.000518549	0.000381631	0.999957	chr3	125359821	chr3:125357388-125357637	Shelf					FALSE
cg04554928_TC21	0.106436	0.00058737	0.00038401	0.999957	chr6	30172454	chr6:30171941-30172486	Island	exon_8;exon_7;3UTR;3UTR	TRIM15;TRIM15;TRIM15;TRIM15			FALSE
cg13350855_BC21	-0.130446	0.000522469	0.000384659	0.999957	chr11	6622521		OpenSea	exon_21	DCHS1			FALSE
cg03857931_BC21	-0.082941	0.000526118	0.000387479	0.999957	chr13	46054058	chr13:46052319-46052884	Shore	TSS1500;TSS1500;TSS1500;TSS1500	ENSG00000123200.17;ENSG00000123200.17;ENSG00000123200.17;ENSG00000123200.17			FALSE
cg22026953_BC21	-0.176569	0.000527158	0.000388283	0.999957	chr6	87054239		OpenSea					FALSE
cg26427442_BC21	-0.0339319	0.00052844	0.000389273	0.999957	chr20	32334550		OpenSea	exon_9;3UTR	KIF3B;KIF3B			FALSE
cg02062326_BC11	0.0420155	0.00059516	0.000389401	0.999957	chr14	75177024	chr14:75176161-75176673	Shore	exon_1;TSS1500;TSS1500;TSS1500;TSS1500	ENSG00000273565;ENSG00000170348.9;ENSG00000170348.9;ENSG00000170348.9;ENSG00000170348.9		Promoter_Associated	TRUE
cg19015303_TC21	-0.174876	0.000529975	0.00039046	0.999957	chr15	71716977		OpenSea					FALSE
cg04612523_TC21	0.0199773	0.000599432	0.000392359	0.999957	chr4	141229684		OpenSea	exon_6;exon_6;exon_6;exon_6;exon_6;exon_5;3UTR;3UTR	ZNF330;ZNF330;ZNF330;ZNF330;ZNF330;ZNF330;ZNF330;ZNF330			FALSE
cg13419330_TC21	0.0109673	0.000602055	0.000394176	0.999957	chr3	10205803		OpenSea					FALSE
cg18458352_TC21	0.106233	0.0006029	0.000394761	0.999957	chr6	29743472		OpenSea					FALSE
cg05766136_TC21	-0.102577	0.000536286	0.000395341	0.999957	chr6	32169433	chr6:32166683-32167419	Shelf	exon_18;exon_7;exon_7;exon_7;exon_7;exon_5;exon_7;exon_7;3UTR	PPT2-EGFL8;AGPAT1;AGPAT1;AGPAT1;AGPAT1;AGPAT1;AGPAT1;AGPAT1;PPT2-EGFL8			FALSE
cg07787407_TC21	0.0877009	0.000604766	0.000396053	0.999957	chr19	43682017		OpenSea			chr19:43681835-43682179		FALSE
cg27454842_TC21	-0.0899948	0.000537711	0.000396444	0.999957	chr22	31631602	chr22:31630311-31630888	Shore	TSS1500;TSS1500;TSS1500;TSS1500	ENSG00000241878.12;ENSG00000241878.12;ENSG00000241878.12;ENSG00000241878.12		Promoter_Associated	TRUE
cg23109137_TC11	-0.0222705	0.000543162	0.000400663	0.999957	chr6	28866743	chr6:28863905-28864357	Shelf			chr6:28866698-28866809	Promoter_Associated_Cell_type_specific	TRUE
cg00198969_BC21	0.180111	0.000613883	0.000402373	0.999957	chr13	43543492		OpenSea	TSS1500	ENSG00000233821.1			FALSE
cg01167029_TC21	-0.0753969	0.000546822	0.000403496	0.999957	chr11	125097000		OpenSea	exon_5;exon_5;3UTR;3UTR	TMEM218;TMEM218;TMEM218;TMEM218			FALSE
cg08386009_TC21	0.0961067	0.000615823	0.000403719	0.999957	chr6	32127068		OpenSea					FALSE
cg12482988_BC21	-0.0804434	0.000548151	0.000404525	0.999957	chr8	42354235		OpenSea	TSS1500	ENSG00000070501.12			FALSE
cg21226938_TC21	0.138345	0.000620746	0.000407134	0.999957	chr9	136489622		OpenSea					FALSE
cg17670999_TC21	-0.0899197	0.000553751	0.000408863	0.999957	chr8	144703013	chr8:144700025-144700716	Shelf					FALSE
cg02125727_BC11	-0.0073576	0.000557431	0.000411715	0.999957	chr4	47914619	chr4:47913844-47914863	Island	exon_1;exon_1;exon_1;exon_1;5UTR;5UTR;TSS200;TSS200;TSS200	NFXL1;NFXL1;NIPAL1;NIPAL1;NFXL1;NFXL1;ENSG00000170448.12;ENSG00000170448.12;ENSG00000170448.12		Promoter_Associated	TRUE
cg20636399_TC21	0.198252	0.000628769	0.000412703	0.999957	chr14	92362917		OpenSea					FALSE
cg17048731_BC21	0.131892	0.000628974	0.000412846	0.999957	chr18	2988585		OpenSea					FALSE
cg19694713_BC21	-0.14239	0.000559208	0.000413092	0.999957	chr14	73937785		OpenSea					FALSE
cg03697308_BC11	0.20159	0.000629896	0.000413486	0.999957	chr13	27971429	chr13:27968084-27969407;chr13:27970387-27970753	Shore					FALSE
cg09159761_BC21	0.0886516	0.000629925	0.000413506	0.999957	chr8	100222312		OpenSea					FALSE
cg26580095_BC21	-0.157126	0.000560316	0.000413951	0.999957	chr1	92080093	chr1:92080262-92080923	Shore	TSS1500;TSS1500;TSS1500;TSS1500	ENSG00000189195.15;ENSG00000189195.15;ENSG00000189195.15;ENSG00000189195.15		Promoter_Associated_Cell_type_specific	TRUE
cg21791720_BC21	0.363413	0.000632935	0.000415597	0.999957	chr16	79789201		OpenSea					FALSE
cg12777599_TC21	0.0389428	0.000635396	0.000417307	0.999957	chr12	71896334		OpenSea	TSS200;TSS1500	ENSG00000121749.16;ENSG00000121749.16			FALSE
cg22971191_BC21	0.14296	0.000635756	0.000417557	0.999957	chr13	103067356		OpenSea	TSS1500	ENSG00000125255.7			FALSE
cg16811230_TC11	-0.0114493	0.00056631	0.0004186	0.999957	chr3	39107744	chr3:39106886-39107909	Island	exon_1;exon_1;exon_1;exon_1;exon_1;exon_1;exon_1;exon_1;exon_1;exon_1;exon_1;exon_1;5UTR;5UTR;5UTR;5UTR;5UTR;5UTR;5UTR;TSS200;TSS200;TSS200;TSS200;TSS200;TSS1500;TSS200;TSS200;TSS200;TSS200;TSS200;TSS200;TSS200;TSS200;TSS200;TSS200;TSS200;TSS1500;TSS200;TSS200;TSS200;TSS200;TSS200;TSS200;TSS200;TSS200;TSS200;TSS200;TSS200;TSS200;TSS200;TSS200;TSS200;TSS200;TSS200;TSS200;TSS200;TSS200;TSS200;TSS20…	GORASP1;GORASP1;GORASP1;GORASP1;TTC21A;TTC21A;TTC21A;TTC21A;TTC21A;TTC21A;TTC21A;TTC21A;TTC21A;TTC21A;TTC21A;TTC21A;GORASP1;GORASP1;GORASP1;ENSG00000114745.15;ENSG00000114745.15;ENSG00000114745.15;ENSG00000114745.15;ENSG00000114745.15;ENSG00000114745.15;ENSG00000114745.15;ENSG00000114745.15;ENSG00000114745.15;ENSG00000114745.15;ENSG00000114745.15;ENSG00000114745.15;ENSG00000114745.15;ENSG00000114…			FALSE
cg21200293_BC21	-0.108805	0.000572522	0.000423419	0.999957	chr3	178325773		OpenSea					FALSE
cg18514437_TC21	-0.0416058	0.000574797	0.000425185	0.999957	chr13	24968267		OpenSea	exon_1;exon_1;exon_1;exon_1;exon_1;exon_1;exon_1;exon_1;exon_1;exon_1;exon_1;exon_1;exon_1;exon_1;exon_1;exon_1;exon_1;TSS1500	TPTE2P1;TPTE2P1;TPTE2P1;TPTE2P1;TPTE2P1;TPTE2P1;TPTE2P1;TPTE2P1;TPTE2P1;TPTE2P1;TPTE2P1;TPTE2P1;TPTE2P1;TPTE2P1;TPTE2P1;TPTE2P1;TPTE2P1;ENSG00000253771.8			FALSE
cg06561188_BC21	-0.13225	0.000576892	0.000426812	0.999957	chr11	12723814		OpenSea					FALSE
cg12122387_BC21	0.0854489	0.000649757	0.000427292	0.999957	chr8	17898676		OpenSea					FALSE
cg06892217_TC11	0.0115832	0.000651152	0.000428263	0.999957	chr17	41919037	chr17:41918038-41919127	Island	TSS200;TSS200;TSS200;TSS200;TSS200;TSS200;TSS200	ENSG00000131473.17;ENSG00000131473.17;ENSG00000131473.17;ENSG00000131473.17;ENSG00000131473.17;ENSG00000131473.17;ENSG00000131473.17		Promoter_Associated	TRUE
cg03029146_TC21	0.124074	0.000655039	0.000430968	0.999957	chr15	76973553		OpenSea				Unclassified	TRUE
cg25381667_TC11	0.0118903	0.000656051	0.000431673	0.999957	chr11	27722104	chr11:27721925-27723017;chr11:27719097-27719618;chr11:27720512-27720726	Island	TSS200;TSS1500;TSS1500;TSS1500	ENSG00000176697.20;ENSG00000176697.20;ENSG00000176697.20;ENSG00000176697.20			FALSE
cg09553569_TC21	0.0814002	0.000656324	0.000431862	0.999957	chr3	119148981		OpenSea					FALSE
cg24224638_BC21	-0.231989	0.000586107	0.000433969	0.999957	chr2	10461010		OpenSea					FALSE
cg07018577_BC21	-0.0867859	0.000588045	0.000435475	0.999957	chr1	180862260		OpenSea					FALSE
cg09601704_TC11	0.0147456	0.000662904	0.000436445	0.999957	chr17	8124109	chr17:8120642-8120921;chr17:8121440-8123544;chr17:8125463-8125694;chr17:8126355-8126772	Shore	TSS200;TSS200;TSS200	ENSG00000179111.9;ENSG00000179111.9;ENSG00000179111.9			FALSE
cg22222413_TC11	-0.177324	0.000592208	0.00043871	0.999957	chr3	42025304		OpenSea					FALSE
cg16866892_BC21	-0.0340979	0.000592578	0.000438997	0.999957	chr12	2652329		OpenSea	exon_3	CACNA1C			FALSE
cg08169794_TC21	0.0405568	0.000673079	0.000443535	0.999957	chr6	118388519		OpenSea					FALSE
cg02159654_BC21	-0.101705	0.000599304	0.000444228	0.999957	chr12	124267102		OpenSea					FALSE
cg01557772_TC21	0.139937	0.000675002	0.000444876	0.999957	chr3	21217272		OpenSea					FALSE
cg10445545_BC21	-0.108313	0.00060374	0.000447679	0.999957	chr3	178558839		OpenSea	exon_1;exon_1;5UTR;5UTR;TSS200	KCNMB2;KCNMB2;KCNMB2;KCNMB2;ENSG00000197584.13			FALSE
cg21712331_BC21	-0.0693426	0.000604008	0.000447887	0.999957	chr13	98978235		OpenSea	TSS200;TSS1500;TSS200;TSS200;TSS200	ENSG00000088387.22;ENSG00000088387.22;ENSG00000088387.22;ENSG00000088387.22;ENSG00000088387.22			FALSE
cg24483306_TC11	-0.0109879	0.0006085	0.000451383	0.999957	chr15	90871567	chr15:90871081-90871290;chr15:90871426-90872280	Island	exon_1;5UTR;TSS1500;TSS1500	FURIN;FURIN;ENSG00000140564.13;ENSG00000140564.13			FALSE
cg16364925_BC21	-0.105329	0.000609319	0.00045202	0.999957	chr19	795361	chr19:795360-795561;chr19:796506-798936	Island					FALSE
cg08411611_TC21	-0.0753533	0.000610818	0.000453188	0.999957	chr5	115869431		OpenSea			chr5:115869325-115869690		FALSE
cg00290422_BC21	-0.0611141	0.000611275	0.000453543	0.999957	chr12	49037394		OpenSea	exon_35;exon_35;exon_34;exon_34;exon_1;exon_1;exon_4;exon_2;5UTR;TSS200	KMT2D;KMT2D;KMT2D;KMT2D;KMT2D;KMT2D;KMT2D;KMT2D;KMT2D;ENSG00000167548.18			FALSE
cg26583705_BC21	-0.038761	0.000611574	0.000453776	0.999957	chr12	88155247		OpenSea					FALSE
cg11538788_TC21	-0.0434775	0.000612489	0.000454488	0.999957	chr11	1482281		OpenSea	TSS1500;TSS1500	ENSG00000182208.15;ENSG00000182208.15			FALSE
cg04518426_BC21	0.0788666	0.000690557	0.00045573	0.999957	chr15	50248924		OpenSea					FALSE
cg24994790_TC21	0.117825	0.000690571	0.000455739	0.999957	chr20	14361964		OpenSea					FALSE
cg04806638_BC21	-0.022271	0.000618141	0.000458891	0.999957	chr5	172423450		OpenSea					FALSE
cg09924009_TC21	0.0748097	0.000695099	0.000458901	0.999957	chr10	88592477		OpenSea	exon_2	LIPJ			FALSE
cg25738958_TC11	0.00873039	0.00069739	0.000460502	0.999957	chr15	73927914	chr15:73926355-73928032	Island	exon_1;exon_1;exon_1;exon_1;exon_1;exon_1;TSS1500;TSS200;TSS1500	LOXL1-AS1;LOXL1-AS1;LOXL1-AS1;LOXL1-AS1;LOXL1-AS1;LOXL1-AS1;ENSG00000261801.8;ENSG00000261801.8;ENSG00000261801.8		Promoter_Associated_Cell_type_specific	TRUE
cg12370917_BC21	0.143001	0.000698659	0.000461389	0.999957	chr17	46916631		OpenSea					FALSE
cg05966726_BC21	-0.0898896	0.000623041	0.000462708	0.999957	chr17	7476362	chr17:7478947-7479884	Shelf					FALSE
cg22395021_TC21	-0.0837948	0.000624159	0.000463579	0.999957	chr6	97273564		OpenSea	TSS1500;TSS1500;TSS1500	ENSG00000146263.12;ENSG00000146263.12;ENSG00000146263.12			FALSE
cg23320985_BC21	0.0440098	0.000703258	0.000464602	0.999957	chr18	21458734		OpenSea					FALSE
cg07087673_BC21	-0.0458066	0.00062624	0.000465201	0.999957	chr1	24090860		OpenSea	exon_12;exon_10	MYOM3;MYOM3			FALSE
cg07191562_BC21	0.125509	0.00070496	0.000465792	0.999957	chr20	14845168		OpenSea					FALSE
cg22703477_BC21	0.0835148	0.000705112	0.000465898	0.999957	chr17	54172814		OpenSea					FALSE
cg15847616_BC11	-0.0466843	0.000629837	0.000468006	0.999957	chr10	132985187	chr10:132982957-132983392	Shore					FALSE
cg12039072_TC11	-0.0153108	0.000629997	0.00046813	0.999957	chr5	1887193	chr5:1881810-1887629	Island	exon_1;exon_1;5UTR;5UTR;TSS1500;TSS200;TSS200	IRX4;IRX4;IRX4;IRX4;ENSG00000113430.10;ENSG00000113430.10;ENSG00000249326.1			FALSE
cg26681123_TC21	0.0779866	0.000709894	0.000469242	0.999957	chr9	137230859	chr9:137234110-137234571	Shelf	exon_1;exon_1;5UTR;5UTR;TSS200;TSS200;TSS200	SLC34A3;SLC34A3;SLC34A3;SLC34A3;ENSG00000198569.10;ENSG00000198569.10;ENSG00000198569.10			FALSE
cg20744353_BC21	-0.135842	0.000634478	0.000471625	0.999957	chr1	2808019		OpenSea					FALSE
cg07691793_BC21	-0.0530692	0.000635358	0.000472311	0.999957	chr8	140530469		OpenSea	exon_19;3UTR	AGO2;AGO2		Gene_Associated	TRUE
cg03405560_BC11	0.065351	0.000717792	0.000474767	0.999957	chr16	31873419	chr16:31873721-31874279	Shore	TSS1500;TSS1500;TSS1500;TSS1500;TSS1500	ENSG00000185947.15;ENSG00000185947.15;ENSG00000185947.15;ENSG00000185947.15;ENSG00000185947.15		NonGene_Associated	TRUE
cg24729559_BC21	0.0811479	0.000718085	0.000474972	0.999957	chr5	53560513	chr5:53560835-53561040	Shore	TSS200;TSS200;TSS200;TSS200;TSS200	ENSG00000164258.12;ENSG00000164258.12;ENSG00000164258.12;ENSG00000164258.12;ENSG00000164258.12		Promoter_Associated	TRUE
cg17639073_TC21	0.146891	0.00071833	0.000475143	0.999957	chr12	53515282		OpenSea	exon_12;exon_12;3UTR;3UTR	ATF7;ATF7;ATF7;ATF7			FALSE
cg03838151_BC21	0.0789242	0.000718977	0.000475596	0.999957	chr7	143341888	chr7:143345415-143345774	Shelf					FALSE
cg12390907_BC11	0.00936397	0.000719149	0.000475716	0.999957	chr10	123154122	chr10:123147767-123151519;chr10:123154115-123155210	Island	TSS1500;TSS1500;TSS1500;TSS1500	ENSG00000154473.18;ENSG00000154473.18;ENSG00000154473.18;ENSG00000154473.18		Promoter_Associated	TRUE
cg05099107_BC21	-0.0269392	0.000639897	0.000475852	0.999957	chr9	127794652		OpenSea	exon_1;TSS200	FPGS;ENSG00000136877.15			FALSE
cg06426753_TC21	0.0681104	0.000721571	0.000477411	0.999957	chr4	33425924		OpenSea					FALSE
cg21978205_BC21	0.0506943	0.000721691	0.000477495	0.999957	chr16	89815812	chr16:89815984-89817050	Shore				Promoter_Associated	TRUE
cg00844197_BC21	0.169878	0.0007241	0.000479182	0.999957	chr19	55149962	chr19:55146264-55147030	Shelf	TSS1500;TSS1500;TSS1500;TSS1500;TSS1500;TSS1500;TSS1500;TSS1500	ENSG00000105048.18;ENSG00000105048.18;ENSG00000105048.18;ENSG00000105048.18;ENSG00000105048.18;ENSG00000105048.18;ENSG00000105048.18;ENSG00000105048.18			FALSE
cg21878229_BC21	0.0229453	0.000727425	0.00048151	0.999957	chr16	85724548		OpenSea					FALSE
cg13757147_BC21	0.0730202	0.000727508	0.000481568	0.999957	chr9	72954631		OpenSea					FALSE
cg26071673_BC21	0.389278	0.000728129	0.000482003	0.999957	chr22	20128039	chr22:20130986-20132111	Shelf	TSS1500	ENSG00000099904.16			FALSE
cg16404047_BC21	0.126237	0.000728298	0.000482122	0.999957	chr19	15197358	chr19:15195432-15196300;chr19:15199708-15201216	Shore				Unclassified_Cell_type_specific	TRUE
cg03148038_BC21	-0.087997	0.000648391	0.000482482	0.999957	chr2	216662192		OpenSea	exon_2	IGFBP2			FALSE
cg07921792_TC21	-0.09961	0.000648714	0.000482735	0.999957	chr2	182941843		OpenSea					FALSE
cg23986748_TC21	0.0380528	0.000730896	0.000483941	0.999957	chr19	4890682	chr19:4891179-4891413	Shore	exon_3;exon_3;3UTR;3UTR	ARRDC5;ARRDC5;ARRDC5;ARRDC5			FALSE
cg18799546_BC21	-0.0458549	0.000650883	0.000484428	0.999957	chr5	74126187		OpenSea					FALSE
cg09374627_TC21	0.16825	0.000736532	0.00048789	0.999957	chr14	96739833	chr14:96741440-96741948	Shore	TSS1500;TSS1500;TSS1500	ENSG00000258979.3;ENSG00000258979.3;ENSG00000258979.3			FALSE
cg08474669_BC21	-0.0750839	0.000662434	0.000493453	0.999957	chr11	64761726	chr11:64765464-64766291	Shelf					FALSE
cg15997512_TC11	0.0237172	0.000745758	0.000494359	0.999957	chr8	21750742	chr8:21750566-21750823	Island	exon_4;exon_4;exon_6;exon_2;exon_3;exon_5;3UTR	GFRA2;GFRA2;GFRA2;GFRA2;GFRA2;GFRA2;GFRA2			FALSE
cg16362519_BC21	0.0244745	0.000746539	0.000494906	0.999957	chr17	17003308		OpenSea					FALSE
cg16058765_BC11	-0.0908423	0.000664566	0.00049512	0.999957	chr2	23690596	chr2:23690438-23690699	Island	exon_1	KLHL29			FALSE
cg07030287_TC21	0.0491601	0.000748989	0.000496625	0.999957	chr2	241235382		OpenSea	exon_11	HDLBP			FALSE
cg06858379_BC21	0.0690191	0.000750039	0.000497361	0.999957	chr3	16203341		OpenSea					FALSE
cg17760571_TC21	0.00965014	0.000750809	0.000497901	0.999957	chr5	74767006	chr5:74766741-74767400	Island	exon_1;exon_1;exon_1;exon_1;exon_1;exon_1;exon_1;5UTR;5UTR;5UTR;5UTR;5UTR;5UTR;5UTR;TSS1500;TSS1500;TSS1500	GFM2;GFM2;GFM2;GFM2;GFM2;GFM2;NSA2;NSA2;GFM2;GFM2;GFM2;GFM2;GFM2;GFM2;ENSG00000164346.10;ENSG00000164346.10;ENSG00000164346.10		Promoter_Associated	TRUE
cg16630572_TC21	-0.0292675	0.000670901	0.000500073	0.999957	chr16	57620005		OpenSea	exon_1;exon_1;5UTR;5UTR;TSS200;TSS200;TSS200;TSS200;TSS200;TSS200;TSS200;TSS200;TSS1500;TSS1500	ADGRG1;ADGRG1;ADGRG1;ADGRG1;ENSG00000205336.14;ENSG00000205336.14;ENSG00000205336.14;ENSG00000205336.14;ENSG00000205336.14;ENSG00000205336.14;ENSG00000205336.14;ENSG00000205336.14;ENSG00000205336.14;ENSG00000205336.14			FALSE
cg06419218_BC21	0.0406173	0.000754046	0.000500173	0.999957	chr11	130693248		OpenSea					FALSE
cg07601982_BC21	-0.0961621	0.000672478	0.000501306	0.999957	chr5	127621118		OpenSea					FALSE
cg21642649_TC21	-0.0541208	0.000672568	0.000501376	0.999957	chr21	32771807	chr21:32771142-32771830	Island	TSS200;TSS200;TSS200;TSS200;TSS200;TSS1500;TSS1500;TSS1500;TSS1500;TSS1500;TSS1500;TSS1500;TSS1500;TSS1500;TSS1500;TSS1500;TSS1500;TSS1500;TSS1500;TSS1500	ENSG00000159086.15;ENSG00000159086.15;ENSG00000159086.15;ENSG00000159086.15;ENSG00000159086.15;ENSG00000205930.11;ENSG00000205930.11;ENSG00000205930.11;ENSG00000205930.11;ENSG00000205930.11;ENSG00000205930.11;ENSG00000205930.11;ENSG00000205930.11;ENSG00000205930.11;ENSG00000205930.11;ENSG00000205930.11;ENSG00000205930.11;ENSG00000205930.11;ENSG00000205930.11;ENSG00000205930.11		Promoter_Associated	TRUE
cg03664097_TC21	-0.111723	0.000672821	0.000501575	0.999957	chr3	123813032		OpenSea	TSS1500	ENSG00000207002.1			FALSE
cg08881995_TC11	0.00828369	0.000756061	0.000501587	0.999957	chr1	1116515	chr1:1115135-1117065	Island	TSS1500;TSS1500;TSS1500;TSS1500;TSS1500;TSS1500;TSS1500;TSS200;TSS200;TSS1500;TSS1500	ENSG00000131591.18;ENSG00000131591.18;ENSG00000131591.18;ENSG00000131591.18;ENSG00000131591.18;ENSG00000131591.18;ENSG00000131591.18;ENSG00000131591.18;ENSG00000131591.18;ENSG00000131591.18;ENSG00000131591.18		Promoter_Associated	TRUE
cg04568895_BC21	0.0405532	0.000756324	0.000501772	0.999957	chr4	41143246		OpenSea	TSS200	ENSG00000289761.1			FALSE
cg24172128_TC21	0.191171	0.00075704	0.000502274	0.999957	chr19	13882162	chr19:13880187-13880403	Shore				Unclassified_Cell_type_specific	TRUE
cg03073914_TC21	0.0335324	0.000758339	0.000503186	0.999957	chr14	37469560		OpenSea					FALSE
cg25889438_TC21	-0.0508849	0.000675281	0.000503499	0.999957	chr21	41478024		OpenSea					FALSE
cg16045498_TC11	-0.0409636	0.000680118	0.000507284	0.999957	chr1	119948332		OpenSea				Gene_Associated	TRUE
cg14184890_BC21	-0.19115	0.000681381	0.000508272	0.999957	chr14	30270618		OpenSea			chr14:30270597-30270934		FALSE
cg14613365_TC21	0.115023	0.000767555	0.000509658	0.999957	chr10	132955586		OpenSea				Unclassified_Cell_type_specific	TRUE
cg26303783_TC21	0.0506449	0.000768283	0.000510169	0.999957	chr8	20201062	chr8:20197035-20197516	Shelf			chr8:20200851-20201261		FALSE
cg21620540_BC21	0.138693	0.000768812	0.000510541	0.999957	chr11	12009767	chr11:12008190-12009294	Shore	exon_1;5UTR;TSS1500;TSS200;TSS200;TSS1500;TSS1500;TSS1500;TSS1500;TSS1500;TSS1500;TSS1500;TSS1500;TSS1500	DKK3;DKK3;ENSG00000050165.19;ENSG00000050165.19;ENSG00000050165.19;ENSG00000050165.19;ENSG00000050165.19;ENSG00000050165.19;ENSG00000050165.19;ENSG00000050165.19;ENSG00000050165.19;ENSG00000050165.19;ENSG00000050165.19;ENSG00000050165.19			FALSE
cg02532717_BC21	-0.10673	0.000685319	0.000511355	0.999957	chr1	22144062	chr1:22142419-22143759	Shore	TSS1500;TSS200	ENSG00000162552.15;ENSG00000162552.15			FALSE
cg02286659_TC11	0.0620344	0.000773247	0.000513658	0.999957	chr17	38532479		OpenSea	exon_19;exon_20;3UTR;3UTR	SRCIN1;SRCIN1;SRCIN1;SRCIN1			FALSE
cg08884205_BC21	-0.0508001	0.000689622	0.000514724	0.999957	chr5	172105681		OpenSea	exon_7;exon_3;exon_2;exon_4	STK10;STK10;STK10;STK10			FALSE
cg07998840_TC21	-0.022042	0.000690507	0.000515417	0.999957	chr16	88784887	chr16:88783796-88784129;chr16:88784336-88785866	Island					FALSE
cg14302804_BC21	-0.0876686	0.000693631	0.000517864	0.999957	chr18	36662256		OpenSea					FALSE
cg22957474_TC11	0.0299114	0.000779235	0.000517866	0.999957	chr5	141877083	chr5:141875999-141878403;chr5:141878857-141879251	Island			chr5:141876987-141877297	Unclassified_Cell_type_specific	TRUE
cg13986618_TC21	0.0977301	0.000784376	0.000521482	0.999957	chr12	7443385	chr12:7439810-7440434	Shelf					FALSE
cg18896071_BC21	-0.063044	0.000698453	0.000521642	0.999957	chr1	243741665		OpenSea	TSS1500	ENSG00000232184.1			FALSE
cg22216302_TC21	-0.0478563	0.000698763	0.000521885	0.999957	chr20	34880404	chr20:34876353-34876842	Shelf					FALSE
cg17111236_TC21	0.0422625	0.000785173	0.000522043	0.999957	chr1	41710065		OpenSea					FALSE
cg13541793_BC21	0.143546	0.000786723	0.000523133	0.999957	chr21	23162562		OpenSea					FALSE
cg06022664_TC11	-0.0365526	0.000701251	0.000523835	0.999957	chr15	68843974		OpenSea				Unclassified_Cell_type_specific	TRUE
cg15008085_BC21	-0.0538172	0.000702386	0.000524725	0.999957	chr6	2247973	chr6:2244884-2245919	Shelf	TSS1500;TSS1500;TSS1500	ENSG00000250903.11;ENSG00000250903.11;ENSG00000250903.11		Unclassified_Cell_type_specific	TRUE
cg09859322_BC21	-0.0200963	0.000704618	0.000526474	0.999957	chr5	64768693	chr5:64768416-64768711	Island	TSS200;TSS200;TSS200;TSS200;TSS1500;TSS1500;TSS1500;TSS1500;TSS1500;TSS1500;TSS1500;TSS1500;TSS1500;TSS1500;TSS1500;TSS1500;TSS1500;TSS1500;TSS1500;TSS1500;TSS1500;TSS1500;TSS1500;TSS1500;TSS1500;TSS1500	ENSG00000153006.16;ENSG00000153006.16;ENSG00000153006.16;ENSG00000153006.16;ENSG00000153015.17;ENSG00000153015.17;ENSG00000153015.17;ENSG00000153015.17;ENSG00000153015.17;ENSG00000153015.17;ENSG00000153015.17;ENSG00000153015.17;ENSG00000153015.17;ENSG00000153015.17;ENSG00000153015.17;ENSG00000153015.17;ENSG00000153015.17;ENSG00000153015.17;ENSG00000153015.17;ENSG00000153015.17;ENSG00000153015.17;…		Promoter_Associated	TRUE
cg10302019_BC21	-0.137794	0.000704947	0.000526733	0.999957	chr9	14180825		OpenSea	TSS200;TSS200	ENSG00000147862.18;ENSG00000147862.18			FALSE
cg13585080_BC21	0.165114	0.000792804	0.000527412	0.999957	chr2	145022828		OpenSea	TSS1500;TSS1500;TSS1500;TSS1500;TSS1500;TSS1500;TSS1500;TSS1500;TSS1500;TSS1500;TSS1500;TSS1500;TSS1500;TSS1500;TSS1500;TSS1500;TSS1500;TSS1500;TSS1500;TSS1500;TSS1500;TSS1500;TSS1500;TSS1500;TSS1500;TSS1500;TSS1500;TSS1500;TSS1500;TSS1500;TSS1500;TSS1500;TSS1500;TSS1500;TSS1500;TSS1500;TSS1500;TSS1500;TSS1500;TSS1500;TSS1500;TSS1500;TSS1500;TSS1500;TSS1500;TSS1500;TSS1500	ENSG00000226674.11;ENSG00000226674.11;ENSG00000226674.11;ENSG00000226674.11;ENSG00000226674.11;ENSG00000226674.11;ENSG00000226674.11;ENSG00000226674.11;ENSG00000226674.11;ENSG00000226674.11;ENSG00000226674.11;ENSG00000226674.11;ENSG00000226674.11;ENSG00000226674.11;ENSG00000226674.11;ENSG00000226674.11;ENSG00000226674.11;ENSG00000226674.11;ENSG00000226674.11;ENSG00000226674.11;ENSG00000226674.11;…			FALSE
cg10100585_BC21	0.131951	0.000793744	0.000528073	0.999957	chr10	105973994		OpenSea					FALSE
cg08144864_BC21	-0.174331	0.000707709	0.000528898	0.999957	chr1	29650094		OpenSea					FALSE
cg17182054_TC21	0.0462846	0.000795779	0.000529506	0.999957	chr17	56510714	chr17:56510593-56511138	Island	exon_23;exon_22;exon_21;exon_20	ANKFN1;ANKFN1;ANKFN1;ANKFN1			FALSE
cg13601435_BC11	-0.0124617	0.000710072	0.000530751	0.999957	chr9	117745153	chr9:117744949-117745364	Island			chr9:117745095-117745309		FALSE
cg24255371_BC11	0.173777	0.000798043	0.000531099	0.999957	chr8	64575512	chr8:64575979-64576559	Shore	exon_2;exon_2;exon_2;exon_2;exon_2	BHLHE22-AS1;BHLHE22-AS1;BHLHE22-AS1;BHLHE22-AS1;BHLHE22-AS1		Unclassified	TRUE
cg10541255_BC21	0.0729794	0.000799506	0.00053213	0.999957	chr6	72185899	chr6:72182334-72183174	Shelf					FALSE
cg22277092_TC21	0.0870875	0.000799638	0.000532222	0.999957	chr18	26658011	chr18:26655625-26657297	Shore	TSS1500;TSS1500	ENSG00000134504.14;ENSG00000134504.14			FALSE
cg02134145_TC21	-0.0127776	0.000712432	0.000532602	0.999957	chr1	234114755		OpenSea				Unclassified_Cell_type_specific	TRUE
cg08193100_TC11	0.00773956	0.00080079	0.000533034	0.999957	chr2	151289611	chr2:151289355-151289805	Island	exon_1;5UTR;exon_1;exon_1;exon_1;5UTR	NMI;NMI;NMI;NMI;NMI;NMI		Promoter_Associated_Cell_type_specific	TRUE
cg19059493_BC21	-0.0365409	0.000713725	0.000533616	0.999957	chr13	99355654		OpenSea	TSS1500	ENSG00000207719.1			FALSE
cg01204634_BC21	0.0659257	0.000803042	0.00053462	0.999957	chr5	1395041		OpenSea					FALSE
cg06682675_BC21	-0.0432083	0.000717684	0.000536722	0.999957	chr2	99178460	chr2:99180885-99181160	Shelf	TSS200	ENSG00000158411.11			FALSE
cg26346206_BC21	0.177607	0.000806121	0.000536789	0.999957	chr6	38714871	chr6:38715173-38715489	Shore	TSS1500	ENSG00000124721.18		Unclassified_Cell_type_specific	TRUE
cg20084702_TC21	0.075146	0.000807941	0.000538071	0.999957	chr20	37701958		OpenSea					FALSE
cg00446003_TC11	0.00827909	0.000808744	0.000538637	0.999957	chr19	2135688	chr19:2131293-2131882;chr19:2135932-2136165;chr19:2136823-2137091	Shore					FALSE
cg26434250_BC21	-0.0343441	0.000720215	0.000538708	0.999957	chr1	184407526		OpenSea	TSS1500	ENSG00000230470.1			FALSE
cg21029518_TC21	-0.0368236	0.000722037	0.000540138	0.999957	chr8	60653654	chr8:60651645-60652662	Shore	TSS200;TSS200;TSS200	ENSG00000228862.5;ENSG00000228862.5;ENSG00000228862.5		Promoter_Associated	TRUE
cg03742705_BC21	-0.0660765	0.000722199	0.000540266	0.999957	chr1	1470886	chr1:1471464-1472441	Shore	TSS1500;TSS1500	ENSG00000160072.20;ENSG00000160072.20			FALSE
cg05244720_BC11	0.0394007	0.000811273	0.000540419	0.999957	chr10	101121699	chr10:101123220-101123794	Shore				Unclassified	TRUE
cg13862566_TC21	0.0356481	0.000813701	0.00054213	0.999957	chr10	95905298	chr10:95907486-95908221	Shelf					FALSE
cg24878013_BC21	0.0484036	0.000815713	0.000543549	0.999957	chr6	82989089		OpenSea					FALSE
cg04596251_TC21	-0.080531	0.000727134	0.000544139	0.999957	chr3	15317248		OpenSea					FALSE
cg16389285_BC11	-0.00847716	0.00072846	0.00054518	0.999957	chr15	25863252	chr15:25862356-25863671	Island	exon_1;exon_1;exon_1;5UTR;5UTR;5UTR;TSS1500;TSS1500;TSS1500	ATP10A;ATP10A;ATP10A;ATP10A;ATP10A;ATP10A;ENSG00000206190.13;ENSG00000206190.13;ENSG00000206190.13			FALSE
cg08120389_TC21	0.0163288	0.000819686	0.00054635	0.999957	chr17	19977955	chr17:19977363-19978320;chr17:19980012-19980297	Island	TSS200;TSS1500;TSS200;TSS200;TSS200;TSS200	ENSG00000108599.15;ENSG00000108599.15;ENSG00000108599.15;ENSG00000108599.15;ENSG00000108599.15;ENSG00000108599.15		Promoter_Associated	TRUE
cg12627897_TC21	-0.0494327	0.000736386	0.000551406	0.999957	chr5	141934241		OpenSea	exon_9;exon_9;exon_3;exon_1	DELE1;DELE1;DELE1;DELE1			FALSE
cg06077443_TC21	-0.0585287	0.000736853	0.000551773	0.999957	chr18	10457388	chr18:10454085-10455271	Shelf					FALSE
cg10011856_TC21	-0.0377194	0.000738939	0.000553412	0.999957	chr1	94726022		OpenSea					FALSE
cg17359449_BC21	0.10774	0.000831305	0.000554547	0.999957	chr5	138246763		OpenSea					FALSE
cg02195824_BC21	-0.043334	0.000741114	0.000555121	0.999957	chr18	58605179		OpenSea					FALSE
cg13871400_TC11	-0.0983695	0.000743521	0.000557013	0.999957	chr18	63949258		OpenSea	TSS200;TSS200	ENSG00000221887.6;ENSG00000221887.6		Unclassified	TRUE
cg02973843_TC11	0.00718465	0.000836194	0.000557998	0.999957	chr8	42411209	chr8:42410918-42411241	Island					FALSE
cg00039745_BC21	0.0859548	0.000841674	0.000561867	0.999957	chr1	1734007		OpenSea					FALSE
cg18783047_BC11	-0.00881844	0.000752087	0.000563747	0.999957	chr19	10309675	chr19:10309431-10309766	Island	exon_1;exon_1;exon_6;exon_5;5UTR;5UTR;3UTR	ZGLP1;ZGLP1;ENSG00000167807;ENSG00000167807;ZGLP1;ZGLP1;ENSG00000167807			FALSE
cg15539190_TC11	-0.00861661	0.000754924	0.000565979	0.999957	chr13	27450267	chr13:27450028-27451141	Island	exon_1;TSS200;TSS200;TSS1500;TSS200;TSS200;TSS200	ENSG00000289827;ENSG00000122033.15;ENSG00000122033.15;ENSG00000122033.15;ENSG00000122033.15;ENSG00000122033.15;ENSG00000122033.15		Promoter_Associated	TRUE
cg25568397_BC21	0.00711447	0.00085124	0.000568625	0.999957	chr16	88332326		OpenSea			chr16:88331930-88332486		FALSE
cg22449032_BC21	0.0489691	0.000851369	0.000568716	0.999957	chr16	314016		OpenSea					FALSE
cg00642209_TC11	-0.00599086	0.000762127	0.000571646	0.999957	chr20	36951855	chr20:36950934-36952048	Island	exon_1;5UTR;TSS200;TSS200;TSS200;TSS200;TSS200;TSS200;TSS200;TSS200;TSS200;TSS200;TSS200;TSS200;TSS200;TSS1500;TSS1500;TSS1500;TSS200;TSS200;TSS200;TSS200;TSS200;TSS1500;TSS200;TSS1500	SAMHD1;SAMHD1;ENSG00000101347.11;ENSG00000101347.11;ENSG00000101347.11;ENSG00000101347.11;ENSG00000101347.11;ENSG00000101347.11;ENSG00000101347.11;ENSG00000101347.11;ENSG00000101347.11;ENSG00000101347.11;ENSG00000101347.11;ENSG00000101347.11;ENSG00000101347.11;ENSG00000101347.11;ENSG00000101347.11;ENSG00000101347.11;ENSG00000101347.11;ENSG00000101347.11;ENSG00000101347.11;ENSG00000101347.11;ENSG0…		Promoter_Associated	TRUE
cg19839601_TC21	0.0948668	0.000858433	0.00057371	0.999957	chr4	133538048		OpenSea					FALSE
cg00711584_BC12	-0.018021	0.000766393	0.000575003	0.999957	chr16	89306887	chr16:89305079-89305302;chr16:89305573-89307106	Island					FALSE
cg01171213_BC21	0.159469	0.000860745	0.000575345	0.999957	chr16	28900324	chr16:28900623-28900862	Shore					FALSE
cg22758149_TC21	0.0261905	0.000863352	0.000577188	0.999957	chr17	59618660	chr17:59619293-59619919	Shore	exon_1;TSS1500;TSS1500;TSS1500;TSS1500;TSS1500;TSS1500;TSS1500;TSS1500;TSS1500;TSS1500;TSS1500;TSS1500;TSS1500	ENSG00000273702;ENSG00000141367.13;ENSG00000141367.13;ENSG00000141367.13;ENSG00000141367.13;ENSG00000141367.13;ENSG00000141367.13;ENSG00000141367.13;ENSG00000141367.13;ENSG00000141367.13;ENSG00000141367.13;ENSG00000141367.13;ENSG00000141367.13;ENSG00000141367.13			FALSE
cg11403689_BC11	0.0148887	0.000864437	0.000577956	0.999957	chr6	30908077	chr6:30907865-30908180	Island	TSS200;TSS200;TSS200;TSS1500;TSS200	ENSG00000213780.11;ENSG00000213780.11;ENSG00000213780.11;ENSG00000213780.11;ENSG00000288473.1		Promoter_Associated	TRUE
cg02717570_TC21	0.0233913	0.000865214	0.000578505	0.999957	chr17	29593916	chr17:29591143-29591380;chr17:29592856-29594087	Island					FALSE
cg12391279_TC21	0.0675644	0.000866029	0.000579082	0.999957	chr10	120012899	chr10:120011469-120011911	Shore					FALSE
cg03597418_BC21	0.129672	0.000867035	0.000579794	0.999957	chr6	158150868		OpenSea					FALSE
cg12709832_BC21	0.172312	0.000869361	0.000581439	0.999957	chr2	113175447		OpenSea	TSS200;TSS200	ENSG00000234174.1;ENSG00000234174.1		Promoter_Associated	TRUE
cg11623922_BC11	-0.0174583	0.000775155	0.000581903	0.999957	chr6	27791607		OpenSea				Unclassified	TRUE
cg15156551_TC21	0.0654703	0.000871731	0.000583116	0.999957	chr7	135193914		OpenSea	exon_1;TSS1500;TSS1500;TSS1500	WDR91;ENSG00000105875.15;ENSG00000105875.15;ENSG00000105875.15			FALSE
cg16933931_BC21	0.0124555	0.000871851	0.000583201	0.999957	chr19	2061153	chr19:2061111-2062055;chr19:2064854-2065266	Island				Promoter_Associated	TRUE
cg15423035_BC21	0.0851915	0.000874283	0.000584923	0.999957	chr12	54006577	chr12:54005628-54005870;chr12:54006122-54006711;chr12:54008898-54009563	Island				Unclassified	TRUE
cg00981797_BC11	0.00731232	0.000876408	0.000586426	0.999957	chr22	19479919	chr22:19479880-19480288	Island	exon_2;exon_1;exon_1;exon_1;exon_1;exon_1;5UTR;5UTR;5UTR;5UTR;TSS1500;TSS200;TSS200;TSS1500;TSS1500;TSS1500;TSS1500;TSS1500;TSS1500;TSS1500;TSS1500;TSS1500	CDC45;CDC45;CDC45;CDC45;CDC45;CDC45;CDC45;CDC45;CDC45;CDC45;ENSG00000070010.19;ENSG00000093009.11;ENSG00000093009.11;ENSG00000093009.11;ENSG00000070010.19;ENSG00000070010.19;ENSG00000070010.19;ENSG00000070010.19;ENSG00000070010.19;ENSG00000070010.19;ENSG00000070010.19;ENSG00000070010.19		Promoter_Associated	TRUE
cg09208540_TC21	0.137261	0.000877727	0.00058736	0.999957	chr10	133526963	chr10:133527751-133529057	Shore	exon_1;TSS1500;TSS1500;TSS1500;TSS1500;TSS1500;TSS1500	ENSG00000278518;ENSG00000130649.10;ENSG00000130649.10;ENSG00000130649.10;ENSG00000130649.10;ENSG00000130649.10;ENSG00000130649.10			FALSE
cg24343515_TC11	-0.013114	0.000785064	0.000589709	0.999957	chr10	97640711	chr10:97640506-97641225	Island	exon_1;5UTR	PI4K2A;PI4K2A		Promoter_Associated	TRUE
cg07683276_BC21	-0.106276	0.000785208	0.000589823	0.999957	chr6	143863221		OpenSea	exon_10;TSS1500;TSS1500	LTV1;ENSG00000118491.10;ENSG00000118491.10			FALSE
cg06930958_TC21	0.125917	0.000883856	0.0005917	0.999957	chr4	136368988		OpenSea					FALSE
cg15751008_TC21	0.129499	0.000887443	0.000594241	0.999957	chr8	51570341		OpenSea					FALSE
cg21147063_BC21	-0.0559038	0.000792345	0.000595448	0.999957	chr21	32982619	chr21:32978418-32978653	Shelf					FALSE
cg00312000_TC21	-0.0437171	0.000794024	0.000596772	0.999957	chr17	3578996		OpenSea	TSS1500;TSS200	ENSG00000196689.13;ENSG00000263338.1			FALSE
cg03422907_TC21	0.032837	0.000891262	0.000596946	0.999957	chr2	189628960		OpenSea					FALSE
cg24847035_BC21	-0.132113	0.000794994	0.000597537	0.999957	chr10	13201216		OpenSea					FALSE
cg05479262_BC21	0.0325826	0.000892422	0.000597769	0.999957	chr21	44950661	chr21:44948136-44948425	Shelf				Gene_Associated	TRUE
cg01087645_BC11	0.00828853	0.000893412	0.000598471	0.999957	chr16	28492086	chr16:28491492-28492170	Island	exon_1;exon_2;exon_1;exon_2;exon_1;exon_1;exon_1;exon_2;exon_3;exon_3;5UTR;5UTR;5UTR;5UTR;5UTR;TSS200;TSS200;TSS1500;TSS1500;TSS200;TSS200;TSS200;TSS200;TSS200;TSS200;TSS200;TSS200;TSS200;TSS200;TSS200;TSS200;TSS200;TSS200;TSS200;TSS200;TSS200;TSS200;TSS200;TSS200;TSS1500;TSS200;TSS1500;TSS1500;TSS1500;TSS1500;TSS1500;TSS1500;TSS200;TSS200;TSS1500;TSS1500;TSS1500;TSS200;TSS200;TSS200;TSS200;TSS20…	ENSG00000261832;CLN3;CLN3;CLN3;CLN3;CLN3;CLN3;CLN3;CLN3;CLN3;CLN3;CLN3;ENSG00000261832;CLN3;CLN3;ENSG00000261832.6;ENSG00000261832.6;ENSG00000261832.6;ENSG00000261832.6;ENSG00000261832.6;ENSG00000261832.6;ENSG00000261832.6;ENSG00000261832.6;ENSG00000188603.22;ENSG00000188603.22;ENSG00000188603.22;ENSG00000188603.22;ENSG00000188603.22;ENSG00000188603.22;ENSG00000188603.22;ENSG00000188603.22;ENSG00…		Promoter_Associated	TRUE
cg14340610_TC21	0.0199201	0.000897685	0.000601499	0.999957	chr19	37078059	chr19:37078050-37078647	Island	TSS1500;TSS1500;TSS1500;TSS1500;TSS1500	ENSG00000197050.11;ENSG00000197050.11;ENSG00000197050.11;ENSG00000197050.11;ENSG00000197050.11		Promoter_Associated	TRUE
cg02064366_BC11	0.0156673	0.000900383	0.000603412	0.999957	chr17	81071726	chr17:81071654-81071896;chr17:81074298-81074740	Island					FALSE
cg00960204_BC21	-0.0692785	0.000802499	0.000603456	0.999957	chr6	140481091		OpenSea					FALSE
cg26741350_TC21	-0.0917044	0.000804084	0.000604707	0.999957	chr19	32971329	chr19:32971809-32972402	Shore	exon_2;exon_2;3UTR;TSS1500;TSS1500;TSS1500;TSS1500;TSS1500;TSS1500;TSS1500	CEP89;CEP89;CEP89;ENSG00000131944.11;ENSG00000131944.11;ENSG00000131944.11;ENSG00000131944.11;ENSG00000131944.11;ENSG00000131944.11;ENSG00000131944.11			FALSE
cg17993207_BC21	-0.0287821	0.000804154	0.000604762	0.999957	chr12	101743925		OpenSea	exon_3;exon_3;5UTR	CHPT1;CHPT1;CHPT1			FALSE
cg17660233_BC21	-0.0762439	0.00080587	0.000606116	0.999957	chr2	55308224		OpenSea	exon_8;exon_3;TSS1500	CCDC88A;CCDC88A;ENSG00000240401.9			FALSE
cg17576261_TC21	-0.0217938	0.000806524	0.000606632	0.999957	chr12	49046214		OpenSea					FALSE
cg26551166_BC21	0.113232	0.000906117	0.000607477	0.999957	chr1	247682981		OpenSea					FALSE
cg23879884_BC21	0.0354793	0.000913793	0.000612923	0.999957	chr19	1460259	chr19:1455227-1457313	Shelf	exon_11;exon_11;exon_10;exon_10;exon_10	APC2;APC2;APC2;APC2;APC2			FALSE
cg24732524_TC21	0.010909	0.000915518	0.000614148	0.999957	chr9	100427737	chr9:100427494-100427738	Island				Promoter_Associated	TRUE
cg21253076_TC21	0.12531	0.000917519	0.000615568	0.999957	chr8	65967586		OpenSea					FALSE
cg04593538_BC21	-0.177961	0.000819035	0.000616509	0.999957	chr17	43662840		OpenSea	TSS1500;TSS1500;TSS1500	ENSG00000005102.14;ENSG00000005102.14;ENSG00000005102.14			FALSE
cg15448711_BC21	-0.0790207	0.000819571	0.000616932	0.999957	chr10	98172058		OpenSea					FALSE
cg06527124_TC21	-0.0546021	0.000820205	0.000617433	0.999957	chr20	31514020	chr20:31514483-31515053	Shore	TSS1500;TSS1500;TSS1500;TSS1500;TSS1500;TSS1500;TSS1500;TSS1500;TSS1500;TSS1500;TSS1500;TSS1500	ENSG00000101294.18;ENSG00000101294.18;ENSG00000101294.18;ENSG00000101294.18;ENSG00000101294.18;ENSG00000101294.18;ENSG00000101294.18;ENSG00000101294.18;ENSG00000101294.18;ENSG00000101294.18;ENSG00000101294.18;ENSG00000101294.18		Promoter_Associated	TRUE
cg12458103_TC21	-0.074152	0.000824539	0.000620856	0.999957	chr1	70204760	chr1:70205500-70205759	Shore	TSS1500;TSS1500;TSS1500;TSS1500	ENSG00000116754.14;ENSG00000116754.14;ENSG00000116754.14;ENSG00000116754.14			FALSE
cg14285529_TC21	0.0170243	0.000925076	0.000620933	0.999957	chr9	127983191	chr9:127980236-127981207	Shore					FALSE
cg15338098_TC21	-0.187265	0.000824859	0.000621109	0.999957	chr12	55727186	chr12:55728233-55729402	Shore	exon_3;exon_3;exon_2;exon_2;exon_3;exon_3;exon_2;exon_2;exon_3;exon_3;exon_4;5UTR;5UTR;TSS200;TSS1500;TSS200;TSS200;TSS1500	CD63;CD63;CD63;CD63;CD63;CD63;CD63;CD63;CD63;CD63;CD63;CD63;CD63;ENSG00000135404.12;ENSG00000135404.12;ENSG00000135404.12;ENSG00000135404.12;ENSG00000135404.12			FALSE
cg26804423_TC21	0.060433	0.000931555	0.000625534	0.999957	chr7	8161504		OpenSea					FALSE
cg12449520_BC21	-0.0383388	0.000831403	0.000626279	0.999957	chr6	12123395		OpenSea	exon_4;exon_4;exon_4;5UTR	HIVEP1;HIVEP1;HIVEP1;HIVEP1			FALSE
cg14758173_BC21	-0.156975	0.000831917	0.000626685	0.999957	chr1	201720297		OpenSea					FALSE
cg22228520_TC21	-0.0304248	0.000833905	0.000628257	0.999957	chr17	35447558	chr17:35448550-35448775;chr17:35449534-35449869	Shore	TSS200	ENSG00000154760.14		Promoter_Associated_Cell_type_specific	TRUE
cg05234595_BC21	0.0953074	0.000935991	0.000628686	0.999957	chr13	84655005		OpenSea					FALSE
cg13648951_BC21	-0.0792126	0.000835018	0.000629137	0.999957	chr14	101557156	chr14:101559652-101565230	Shelf	TSS1500;TSS1500;TSS1500	ENSG00000258498.10;ENSG00000258498.10;ENSG00000258498.10			FALSE
cg10403239_BC21	0.0650426	0.000938928	0.000630774	0.999957	chr19	29485154		OpenSea					FALSE
cg12459542_TC11	0.0112581	0.000939063	0.000630869	0.999957	chr1	113812224	chr1:113811751-113812678	Island	exon_1;exon_1;exon_1;exon_1;TSS200;TSS1500;TSS1500;TSS1500	RSBN1;RSBN1;RSBN1;RSBN1;ENSG00000231128.7;ENSG00000231128.7;ENSG00000231128.7;ENSG00000231128.7		Promoter_Associated	TRUE
cg15545316_TC21	0.130539	0.000939409	0.000631115	0.999957	chr1	42153299		OpenSea	TSS200	ENSG00000044012.4			FALSE
cg16614556_TC21	-0.205397	0.000838779	0.000632109	0.999957	chr7	10999514		OpenSea					FALSE
cg14406074_TC11	0.0133522	0.000940927	0.000632194	0.999957	chr9	136923910		OpenSea	exon_10	TRAF2			FALSE
cg02486052_TC21	-0.0396994	0.00083894	0.000632237	0.999957	chr11	111877424	chr11:111878846-111879354	Shore	TSS1500;TSS1500	ENSG00000258529.5;ENSG00000258529.5			FALSE
cg13928146_BC21	-0.0399957	0.000840437	0.00063342	0.999957	chr9	95449779		OpenSea	exon_1;exon_1	PTCH1;PTCH1			FALSE
cg01846464_BC21	-0.0706322	0.000842571	0.000635108	0.999957	chr1	204101903		OpenSea					FALSE
cg17619276_TC21	-0.204864	0.000843413	0.000635774	0.999957	chr12	52120167		OpenSea				Unclassified	TRUE
cg24335133_BC21	-0.0478138	0.000843822	0.000636098	0.999957	chr22	45576913		OpenSea	TSS200	ENSG00000077942.19			FALSE
cg09752018_TC21	0.112328	0.00094988	0.00063856	0.999957	chr14	74596988		OpenSea			chr14:74596691-74597095		FALSE
cg04564844_BC21	0.0880287	0.000951887	0.000639987	0.999957	chr17	69655346		OpenSea					FALSE
cg17629372_BC21	-0.149659	0.000852006	0.000642571	0.999957	chr3	127307719		OpenSea					FALSE
cg01841445_TC21	-0.0688004	0.000853004	0.00064336	0.999957	chr3	141250468		OpenSea					FALSE
cg23057092_BC21	-0.0258228	0.000855662	0.000645464	0.999957	chr17	80336978		OpenSea	TSS1500	ENSG00000173821.20			FALSE
cg04704744_BC21	-0.0235713	0.000856033	0.000645757	0.999957	chr1	26891118	chr1:26889670-26890554	Shore	exon_7;exon_3;TSS1500;TSS1500	GPATCH3;GPATCH3;ENSG00000142751.15;ENSG00000142751.15			FALSE
cg21653264_BC21	0.112209	0.000960232	0.000645925	0.999957	chr18	27861027		OpenSea					FALSE
cg12576598_BC21	0.175081	0.000961027	0.00064649	0.999957	chr12	43306386		OpenSea					FALSE
cg05949171_TC21	0.0191672	0.000961347	0.000646718	0.999957	chr16	82626991	chr16:82627046-82628208	Shore	exon_1;exon_1;exon_1;exon_1;exon_1;exon_1;exon_1;exon_1;exon_1;exon_1;5UTR;5UTR;5UTR;5UTR;5UTR;5UTR;5UTR;5UTR;5UTR;TSS200;TSS200	CDH13;CDH13;CDH13;CDH13;CDH13;CDH13;CDH13;CDH13;CDH13;CDH13;CDH13;CDH13;CDH13;CDH13;CDH13;CDH13;CDH13;CDH13;CDH13;ENSG00000140945.17;ENSG00000140945.17			FALSE
cg00830420_TC21	-0.141217	0.000858192	0.000647466	0.999957	chr12	5648848		OpenSea				Unclassified_Cell_type_specific	TRUE
cg01411366_TC21	0.0441539	0.000962582	0.000647597	0.999957	chr3	112294020		OpenSea				Unclassified	TRUE
cg26461710_BC21	-0.024037	0.000859234	0.000648291	0.999957	chr10	89710378		OpenSea					FALSE
cg18450540_BC21	0.0416229	0.000964514	0.000648972	0.999957	chr20	5994458		OpenSea	exon_18;exon_19;exon_19;exon_19;3UTR;3UTR;3UTR;3UTR;exon_19;3UTR	MCM8;MCM8;MCM8;MCM8;MCM8;MCM8;MCM8;MCM8;MCM8;MCM8			FALSE
cg00674483_BC21	-0.101461	0.000860357	0.00064918	0.999957	chr1	43379659		OpenSea					FALSE
cg14849892_TC21	0.0410198	0.000965795	0.000649884	0.999957	chr22	31304359		OpenSea	TSS1500	ENSG00000212542.1			FALSE
cg20634475_TC21	0.0701867	0.000965884	0.000649947	0.999957	chr1	203683257		OpenSea	exon_2;exon_2;exon_1	ATP2B4;ATP2B4;ATP2B4			FALSE
cg20495858_TC21	-0.152378	0.000863711	0.000651835	0.999957	chr15	63403176		OpenSea				Unclassified	TRUE
cg26682608_BC21	-0.0357196	0.000867782	0.000655058	0.999957	chr1	227925322	chr1:227925249-227925514	Island	exon_2	WNT9A			FALSE
cg21552741_BC21	-0.107778	0.000868115	0.000655322	0.999957	chr1	226990664		OpenSea	exon_35;exon_37;exon_36;exon_37;exon_21;3UTR;3UTR;3UTR;3UTR;5UTR;TSS1500	CDC42BPA;CDC42BPA;CDC42BPA;CDC42BPA;CDC42BPA;CDC42BPA;CDC42BPA;CDC42BPA;CDC42BPA;CDC42BPA;ENSG00000233706.1			FALSE
cg25066796_BC21	-0.0292533	0.000869017	0.000656036	0.999957	chr9	114030365		OpenSea					FALSE
cg18198048_BC21	0.0290754	0.000974699	0.000656224	0.999957	chr12	120144932		OpenSea	exon_40	GCN1			FALSE
cg09887367_TC21	0.182199	0.000976104	0.000657225	0.999957	chr11	18668638		OpenSea					FALSE
cg16407894_BC21	-0.0214413	0.000872251	0.000658598	0.999957	chr1	247132851		OpenSea			chr1:247132563-247132923		FALSE
cg00596986_BC21	-0.0370593	0.000874717	0.000660551	0.999957	chr10	69905262		OpenSea					FALSE
cg14377059_TC21	-0.111943	0.000875396	0.000661089	0.999957	chr1	58718209		OpenSea	TSS1500	ENSG00000283445.1		Unclassified_Cell_type_specific	TRUE
cg26973912_BC21	-0.0492277	0.000876016	0.000661581	0.999957	chr8	17747724		OpenSea	TSS1500	ENSG00000212280.1			FALSE
cg05023526_BC21	-0.1431	0.000876083	0.000661634	0.999957	chr4	41692997		OpenSea	exon_1;TSS200;TSS200;TSS1500	LIMCH1;ENSG00000064042.18;ENSG00000249216.1;ENSG00000249216.1		Unclassified	TRUE
cg17055371_BC11	0.0109229	0.000983339	0.00066238	0.999957	chr11	3057555	chr11:3056912-3057754	Island	exon_1;exon_1;5UTR;TSS200;TSS200;TSS200;TSS200;TSS200;TSS200;TSS200;TSS200;TSS200	CARS1;ENSG00000285644;CARS1;ENSG00000110619.18;ENSG00000110619.18;ENSG00000110619.18;ENSG00000110619.18;ENSG00000110619.18;ENSG00000110619.18;ENSG00000110619.18;ENSG00000110619.18;ENSG00000110619.18		Promoter_Associated	TRUE
cg04762199_BC21	0.107963	0.000983975	0.000662833	0.999957	chr1	181079620		OpenSea					FALSE
cg01905949_BC21	0.0379425	0.000985813	0.000664143	0.999957	chr10	13765889		OpenSea			chr10:13765715-13766056		FALSE
cg27379240_TC11	-0.150849	0.000879844	0.000664614	0.999957	chr5	112707222	chr5:112707382-112707974	Shore	TSS1500;TSS1500;TSS1500	ENSG00000134982.17;ENSG00000134982.17;ENSG00000134982.17		Promoter_Associated	TRUE
cg19367540_BC11	-0.0126931	0.000880461	0.000665103	0.999957	chr1	111989180	chr1:111988937-111991151	Island	TSS200;TSS1500;TSS1500;TSS1500	ENSG00000171385.10;ENSG00000231437.3;ENSG00000231437.3;ENSG00000231437.3			FALSE
cg05660251_BC21	0.0672376	0.000987476	0.000665328	0.999957	chr10	85649456		OpenSea					FALSE
cg12236677_TC21	0.0392435	0.00098792	0.000665644	0.999957	chr6	130420686		OpenSea	TSS1500	ENSG00000164484.12			FALSE
cg16956116_BC21	-0.112462	0.000881284	0.000665755	0.999957	chr6	81747159		OpenSea	exon_3;exon_3;exon_3;3UTR;3UTR;3UTR	TENT5A;TENT5A;TENT5A;TENT5A;TENT5A;TENT5A			FALSE
cg21099480_BC21	0.0574138	0.000990751	0.000667663	0.999957	chr8	12609877	chr8:12607194-12607728	Shelf					FALSE
cg00521048_BC11	-0.0248601	0.000884211	0.000668075	0.999957	chr13	49585662	chr13:49585250-49585970	Island	TSS200	ENSG00000136144.12			FALSE
cg07651040_BC21	0.0233725	0.000991597	0.000668266	0.999957	chr17	74923499	chr17:74919473-74920415;chr17:74922900-74924924	Island	TSS1500;TSS1500;TSS1500;TSS1500	ENSG00000182040.9;ENSG00000182040.9;ENSG00000183034.13;ENSG00000183034.13		Unclassified	TRUE
cg19618297_TC21	-0.0546943	0.000886566	0.000669942	0.999957	chr13	112105999	chr13:112104284-112106177;chr13:112106551-112106799	Island	exon_2;TSS1500;TSS1500	LINC00404;ENSG00000224243.2;ENSG00000224243.2			FALSE
cg11539219_BC21	0.0374534	0.000994152	0.000670088	0.999957	chr7	106704362		OpenSea				Unclassified_Cell_type_specific	TRUE
cg21029901_BC21	0.156886	0.000994276	0.000670176	0.999957	chr15	36819852	chr15:36818160-36818577	Shore	TSS1500	ENSG00000223518.5			FALSE
cg13501907_BC21	-0.111167	0.0008883	0.000671316	0.999957	chr2	176132776	chr2:176128751-176130829;chr2:176136493-176137055	Shore					FALSE
cg02086204_BC21	0.130983	0.000997119	0.000672203	0.999957	chr10	23331974		OpenSea					FALSE
cg12326491_BC21	0.0392633	0.000998724	0.000673348	0.999957	chr4	90628292		OpenSea					FALSE
cg16796793_BC11	0.0415911	0.00100004	0.000674285	0.999957	chr18	23662979	chr18:23662402-23663010	Island	TSS200;TSS200;TSS200;TSS1500	ENSG00000154065.17;ENSG00000154065.17;ENSG00000154065.17;ENSG00000154065.17		Unclassified	TRUE
cg19224461_BC21	0.121582	0.00100059	0.00067468	0.999957	chr13	113860287	chr13:113862834-113864233	Shelf					FALSE
cg24849910_BC21	0.128245	0.00100153	0.000675351	0.999957	chr22	29476541	chr22:29479930-29481253	Shelf					FALSE
cg12625595_BC21	-0.0395824	0.000893732	0.000675624	0.999957	chr3	56878205		OpenSea				Unclassified_Cell_type_specific	TRUE
cg17544309_BC11	-0.0196637	0.000893876	0.000675738	0.999957	chr11	75352214	chr11:75351180-75352251	Island	TSS1500;TSS1500;TSS1500	ENSG00000137486.17;ENSG00000137486.17;ENSG00000137486.17			FALSE
cg11414921_BC11	0.0505211	0.00100669	0.000679034	0.999957	chr22	19724511	chr22:19717987-19724583;chr22:19725081-19725300	Island	exon_12;exon_2;3UTR;3UTR	ENSG00000284874;GP1BB;GP1BB;ENSG00000284874		Unclassified_Cell_type_specific	TRUE
cg01541187_BC21	0.0409289	0.0010084	0.00068025	0.999957	chr13	32084580		OpenSea					FALSE
cg12390269_BC21	-0.0640007	0.000901118	0.000681482	0.999957	chr8	143989570	chr8:143989751-143991218	Shore	exon_1;exon_1;TSS1500;TSS1500;TSS1500;TSS1500;TSS1500	PARP10;PARP10;ENSG00000178685.14;ENSG00000178719.17;ENSG00000178719.17;ENSG00000178719.17;ENSG00000178719.17			FALSE
cg24170318_TC21	0.0179716	0.00101085	0.000682002	0.999957	chr19	13822754		OpenSea					FALSE
cg05441541_TC11	-0.0165857	0.000906649	0.00068587	0.999957	chr16	1493910	chr16:1493097-1494425	Island				Unclassified	TRUE
cg16273303_BC21	-0.0789612	0.000906946	0.000686106	0.999957	chr14	95567182		OpenSea					FALSE
cg21785260_TC21	0.0198767	0.00101826	0.000687287	0.999957	chr2	219177374	chr2:219176407-219178289	Island	exon_1;TSS1500;TSS200;TSS1500;TSS1500;TSS1500;TSS1500;TSS1500;TSS1500;TSS1500	ENSG00000290093;ENSG00000115649.16;ENSG00000115649.16;ENSG00000115649.16;ENSG00000144567.11;ENSG00000144567.11;ENSG00000144567.11;ENSG00000144567.11;ENSG00000144567.11;ENSG00000144567.11		Promoter_Associated	TRUE
cg17512904_TC21	0.0910939	0.00102005	0.00068857	0.999957	chr4	100186315	chr4:100189989-100190340	Shelf	3UTR;exon_3	DDIT4L;DDIT4L			FALSE
cg17793781_TC21	-0.0432513	0.000910745	0.000689121	0.999957	chr12	130627269		OpenSea			chr12:130627199-130627588		FALSE
cg21352296_BC11	-0.0288034	0.000911469	0.000689696	0.999957	chr6	34249167	chr6:34248631-34249571	Island	TSS200;TSS200;TSS200;TSS200;TSS200;TSS200;TSS200;TSS200;TSS200	ENSG00000186577.14;ENSG00000186577.14;ENSG00000186577.14;ENSG00000186577.14;ENSG00000186577.14;ENSG00000186577.14;ENSG00000186577.14;ENSG00000186577.14;ENSG00000186577.14		Promoter_Associated	TRUE
cg20908012_BC21	-0.0829105	0.000917519	0.000694499	0.999957	chr19	11044614	chr19:11041194-11041481	Shelf					FALSE
cg15198810_BC22	0.218062	0.00103007	0.000695728	0.999957	chr10	71064713		OpenSea					FALSE
cg18814808_TC21	0.215619	0.00103154	0.000696777	0.999957	chr5	144318635		OpenSea					FALSE
cg07405362_BC21	-0.139159	0.000922172	0.000698194	0.999957	chr20	62392288	chr20:62393944-62394230;chr20:62394711-62395055	Shore					FALSE
cg19861329_TC11	-0.00653043	0.000922379	0.000698359	0.999957	chr6	108560677	chr6:108557627-108562201	Island	TSS1500	ENSG00000118689.15			FALSE
cg21608510_BC21	0.120342	0.00103446	0.00069886	0.999957	chr16	64290645		OpenSea					FALSE
cg02447446_BC21	-0.0987547	0.000924473	0.000700023	0.999957	chr9	134374806		OpenSea			chr9:134374463-134374809		FALSE
cg19038066_TC21	-0.0314939	0.000925052	0.000700482	0.999957	chr12	6563273		OpenSea	TSS200	ENSG00000111641.12		Gene_Associated	TRUE
cg02404400_BC21	-0.0308203	0.000935227	0.000708567	0.999957	chr14	22511508		OpenSea	TSS1500	ENSG00000211859.1			FALSE
cg21252408_TC21	0.263568	0.00104936	0.000709515	0.999957	chr8	137186379		OpenSea					FALSE
cg02389743_TC11	-0.0108696	0.000938576	0.000711229	0.999957	chr2	152099098	chr2:152098119-152099270	Island	exon_1;exon_1;5UTR;TSS200;TSS1500;TSS1500;TSS1500;TSS1500;TSS1500;TSS200;TSS200;TSS1500;TSS1500	CACNB4;CACNB4;CACNB4;ENSG00000182389.20;ENSG00000182389.20;ENSG00000182389.20;ENSG00000182389.20;ENSG00000182389.20;ENSG00000182389.20;ENSG00000182389.20;ENSG00000182389.20;ENSG00000182389.20;ENSG00000182389.20		Unclassified_Cell_type_specific	TRUE
cg05612507_BC21	0.146479	0.00105357	0.000712526	0.999957	chr1	232913023		OpenSea					FALSE
cg10828456_TC21	-0.0545761	0.00094442	0.000715875	0.999957	chr11	368847	chr11:369451-370214	Shore	TSS1500;TSS1500	ENSG00000182272.12;ENSG00000182272.12			FALSE
cg04120645_BC11	0.0154131	0.00106013	0.000717223	0.999957	chr15	90716957	chr15:90717153-90717688	Shore	TSS1500;TSS1500;TSS1500;TSS1500;TSS1500	ENSG00000197299.13;ENSG00000197299.13;ENSG00000197299.13;ENSG00000197299.13;ENSG00000197299.13		Promoter_Associated	TRUE
cg18371275_BC21	0.0332829	0.00106099	0.000717837	0.999957	chr12	131479608		OpenSea	exon_1	ENSG00000279388			FALSE
cg25814970_TC21	0.150999	0.00106176	0.000718388	0.999957	chr2	741268		OpenSea	TSS1500;TSS1500;TSS1500	ENSG00000272342.1;ENSG00000223751.2;ENSG00000231173.1			FALSE
cg06523799_BC21	-0.0570812	0.000950026	0.000720333	0.999957	chr1	168693687		OpenSea					FALSE
cg09506963_TC21	-0.0632129	0.000951217	0.000721281	0.999957	chr8	67950281	chr8:67952190-67952711	Shore					FALSE
cg10700304_TC21	0.0949901	0.0010663	0.000721636	0.999957	chr7	14253488		OpenSea					FALSE
cg23093404_BC21	0.169051	0.00106943	0.000723881	0.999957	chr2	96934050		OpenSea					FALSE
cg25698042_BC21	0.0480098	0.00107013	0.000724379	0.999957	chr13	44292637		OpenSea			chr13:44292627-44292908		FALSE
cg16664682_TC11	-0.0151198	0.000957377	0.000726181	0.999957	chr11	118531274	chr11:118530520-118531354	Island	exon_1;exon_1;TSS1500;TSS1500;TSS1500;TSS1500;TSS200;TSS200;TSS200;TSS200;TSS1500;TSS1500;TSS1500	TMEM25;TMEM25;ENSG00000255435.7;ENSG00000255435.7;ENSG00000255435.7;ENSG00000255435.7;ENSG00000255435.7;ENSG00000149582.16;ENSG00000149582.16;ENSG00000149582.16;ENSG00000149582.16;ENSG00000149582.16;ENSG00000149582.16			FALSE
cg08307369_TC11	0.011868	0.00107318	0.000726563	0.999957	chr7	128739328	chr7:128739060-128739643	Island	exon_1;exon_1;5UTR;5UTR;TSS200;TSS200;TSS200	CALU;CALU;CALU;CALU;ENSG00000128595.17;ENSG00000128595.17;ENSG00000128595.17		Promoter_Associated	TRUE
cg02065676_BC21	0.0827354	0.00107386	0.000727057	0.999957	chr2	179273691		OpenSea	TSS200	ENSG00000237477.1			FALSE
cg00012668_BC21	0.0786733	0.00107796	0.000729993	0.999957	chr14	61586700		OpenSea			chr14:61586547-61586809		FALSE
cg00667974_TC11	-0.0132323	0.000962236	0.000730048	0.999957	chr7	139340249	chr7:139340184-139341552	Island	TSS1500;TSS1500;TSS1500;TSS1500;TSS200;TSS1500	ENSG00000164898.13;ENSG00000164898.13;ENSG00000164898.13;ENSG00000164898.13;ENSG00000146963.18;ENSG00000269955.2		NonGene_Associated	TRUE
cg09395969_TC21	-0.028541	0.00096276	0.000730465	0.999957	chr16	67884098		OpenSea	exon_28;exon_29;exon_24;exon_3;exon_3;exon_5;exon_1;TSS1500;TSS1500;TSS1500	EDC4;EDC4;EDC4;EDC4;EDC4;EDC4;ENSG00000263126;ENSG00000188038.8;ENSG00000188038.8;ENSG00000188038.8		Gene_Associated	TRUE
cg13138436_TC21	-0.0715981	0.000962902	0.000730578	0.999957	chr1	221707734		OpenSea					FALSE
cg10518873_TC21	-0.0630022	0.000964777	0.00073207	0.999957	chr12	1645584	chr12:1645831-1646077	Shore					FALSE
cg24978875_TC21	0.152477	0.00108115	0.000732276	0.999957	chr20	12153714		OpenSea					FALSE
cg10734940_BC21	-0.0296663	0.00096691	0.000733768	0.999957	chr14	73201375		OpenSea					FALSE
cg00513003_TC21	0.0400826	0.00108434	0.000734561	0.999957	chr1	224330668	chr1:224330027-224330491	Shore	TSS1500;TSS1500;TSS1500;TSS1500;TSS1500;TSS1500;TSS1500;TSS1500;TSS1500;TSS1500;TSS1500;TSS1500;TSS1500;TSS1500;TSS1500;TSS1500;TSS1500	ENSG00000143748.18;ENSG00000143748.18;ENSG00000143748.18;ENSG00000143748.18;ENSG00000143748.18;ENSG00000143748.18;ENSG00000143748.18;ENSG00000143748.18;ENSG00000143748.18;ENSG00000143748.18;ENSG00000143748.18;ENSG00000143748.18;ENSG00000143748.18;ENSG00000143748.18;ENSG00000143748.18;ENSG00000143748.18;ENSG00000143748.18		Promoter_Associated	TRUE
cg11495387_TC21	0.0132931	0.00108479	0.000734885	0.999957	chr6	143677921	chr6:143677967-143678530	Shore	TSS200;TSS200;TSS200;TSS200;TSS200;TSS200;TSS1500	ENSG00000112419.15;ENSG00000112419.15;ENSG00000112419.15;ENSG00000112419.15;ENSG00000112419.15;ENSG00000112419.15;ENSG00000112419.15		Promoter_Associated	TRUE
cg08340521_TC11	-0.00486602	0.000969181	0.000735576	0.999957	chr19	6424772	chr19:6424440-6425158;chr19:6425474-6425832	Island	exon_1;exon_1;5UTR;5UTR;TSS1500;TSS1500;TSS1500	KHSRP;KHSRP;KHSRP;KHSRP;ENSG00000088247.19;ENSG00000088247.19;ENSG00000088247.19		Promoter_Associated	TRUE
cg21686600_BC21	-0.0672085	0.000970734	0.000736813	0.999957	chr1	24393219		OpenSea	TSS1500	ENSG00000001460.18		Unclassified	TRUE
cg06511729_BC21	-0.229497	0.000972284	0.000738047	0.999957	chr6	148611464		OpenSea					FALSE
cg08193369_BC21	-0.0457989	0.000975566	0.00074066	0.999957	chr13	32315178	chr13:32311287-32311525;chr13:32315396-32315763	Shore	TSS1500;TSS1500;TSS1500;TSS1500;TSS1500;TSS1500;TSS1500	ENSG00000139618.18;ENSG00000139618.18;ENSG00000139618.18;ENSG00000139618.18;ENSG00000139618.18;ENSG00000139618.18;ENSG00000139618.18		Promoter_Associated	TRUE
cg17415033_TC21	-0.0321294	0.00097786	0.000742487	0.999957	chr6	156688015	chr6:156687004-156687694	Shore				Promoter_Associated	TRUE
cg01794889_BC21	0.0223303	0.0010959	0.000742849	0.999957	chr6	28922622	chr6:28923174-28924236	Shore	TSS1500	ENSG00000204713.11			FALSE
cg26124525_BC11	-0.0869487	0.000981738	0.000745576	0.999957	chr22	23697724		OpenSea	TSS1500	ENSG00000159496.15			FALSE
cg05587118_BC11	-0.00756085	0.000984547	0.000747814	0.999957	chr5	102865960	chr5:102865879-102866208	Island	exon_2;exon_2;exon_2;exon_2;exon_2;exon_2;exon_2;exon_2;exon_2;exon_2;exon_2;exon_2;exon_2;exon_2;exon_2;exon_2;exon_1;exon_1;exon_1;exon_1;5UTR;5UTR;5UTR;5UTR;5UTR;5UTR;5UTR;5UTR;5UTR;5UTR;5UTR;5UTR;5UTR;5UTR;5UTR;5UTR;5UTR;5UTR;5UTR;TSS1500	PAM;PAM;PAM;PAM;PAM;PAM;PAM;PAM;PAM;PAM;PAM;PAM;PAM;PAM;PAM;PAM;PAM;PAM;PAM;PAM;PAM;PAM;PAM;PAM;PAM;PAM;PAM;PAM;PAM;PAM;PAM;PAM;PAM;PAM;PAM;PAM;PAM;PAM;PAM;ENSG00000145730.21			FALSE
cg08155465_BC21	-0.0403423	0.000985218	0.000748349	0.999957	chr15	56884640	chr15:56887079-56887640	Shelf					FALSE
cg22049569_BC11	-0.0135405	0.000987512	0.000750177	0.999957	chr19	53963284	chr19:53962924-53963471	Island	exon_1	CACNG8		Unclassified_Cell_type_specific	TRUE
cg25284741_TC21	0.0977034	0.0011065	0.000750453	0.999957	chr5	157180752		OpenSea	TSS200;TSS200;TSS200;TSS200;TSS200;TSS200	ENSG00000113263.14;ENSG00000113263.14;ENSG00000113263.14;ENSG00000113263.14;ENSG00000113263.14;ENSG00000113263.14		Unclassified	TRUE
cg00820159_TC21	-0.0318497	0.000988721	0.00075114	0.999957	chr3	134376991	chr3:134373415-134374899	Shelf					FALSE
cg04027543_TC21	-0.0262325	0.000989338	0.000751632	0.999957	chr7	2233890	chr7:2232375-2233221	Shore	TSS1500;TSS1500;TSS1500;TSS1500;TSS1500	ENSG00000002822.16;ENSG00000002822.16;ENSG00000002822.16;ENSG00000002822.16;ENSG00000002822.16			FALSE
cg03555067_BC21	-0.0544619	0.000993568	0.000755003	0.999957	chr5	38938229		OpenSea	exon_38;3UTR	RICTOR;RICTOR			FALSE
cg18550894_TC11	-0.0174114	0.000993862	0.000755237	0.999957	chr13	28138379	chr13:28138039-28139316	Island	TSS200;TSS200;TSS200;TSS1500	ENSG00000261485.1;ENSG00000152520.14;ENSG00000152520.14;ENSG00000152520.14			FALSE
cg21616935_TC21	-0.111481	0.000994315	0.000755599	0.999957	chr18	50267861	chr18:50266372-50266666;chr18:50268080-50268626	Shore	TSS1500	ENSG00000172361.6		Gene_Associated	TRUE
cg16329622_TC21	-0.16086	0.00099538	0.000756447	0.999957	chr12	52149646	chr12:52152153-52152579	Shelf			chr12:52149632-52149763		FALSE
cg12209958_BC21	-0.0467003	0.00099544	0.000756496	0.999957	chr8	26467758		OpenSea					FALSE
cg25823677_TC21	0.0666478	0.00111559	0.000756974	0.999957	chr6	88477571		OpenSea					FALSE
cg03292206_TC22	-0.150297	0.000997986	0.000758525	0.999957	chr2	110667337		OpenSea					FALSE
cg14458578_TC21	0.0372473	0.00112016	0.00076026	0.999957	chr17	79295041		OpenSea					FALSE
cg13924215_BC21	-0.147164	0.00100184	0.000761598	0.999957	chr9	91906784		OpenSea					FALSE
cg10999745_BC21	0.0444251	0.0011225	0.000761937	0.999957	chr13	50654541		OpenSea					FALSE
cg14254396_BC11	-0.00999401	0.00100359	0.000762997	0.999957	chr19	5294241	chr19:5290392-5290594;chr19:5292760-5294200	Shore	TSS1500;TSS1500;TSS200	ENSG00000105426.18;ENSG00000105426.18;ENSG00000274447.1			FALSE
cg08453194_TC11	-0.13684	0.00100419	0.000763474	0.999957	chr6	41936660		OpenSea	exon_4;exon_4;exon_4;exon_4;exon_3;exon_4;exon_3;exon_3;exon_3;exon_3;exon_4	CCND3;CCND3;CCND3;CCND3;CCND3;CCND3;CCND3;CCND3;CCND3;CCND3;CCND3		Gene_Associated	TRUE
cg06387980_TC11	0.00924283	0.00112728	0.000765367	0.999957	chr19	17305662	chr19:17302924-17303677;chr19:17305495-17306444	Island	TSS1500;TSS1500	ENSG00000130312.7;ENSG00000130312.7		Promoter_Associated	TRUE
cg08513640_BC21	-0.0324672	0.00100695	0.000765673	0.999957	chr5	131162375	chr5:131164533-131165402	Shelf	exon_3;exon_3;exon_3;exon_3;exon_3;exon_3;exon_2;exon_2;exon_3;3UTR;3UTR;3UTR;3UTR;3UTR;3UTR;3UTR;3UTR	HINT1;HINT1;HINT1;HINT1;HINT1;HINT1;HINT1;HINT1;HINT1;HINT1;HINT1;HINT1;HINT1;HINT1;HINT1;HINT1;HINT1			FALSE
cg02120071_BC11	-0.0129892	0.00100815	0.000766634	0.999957	chr2	113979552	chr2:113979276-113980112	Island	TSS200;TSS1500	ENSG00000234199.3;ENSG00000243179.1		Unclassified	TRUE
cg04948622_TC21	0.0369421	0.00112919	0.000766741	0.999957	chr6	3646809		OpenSea					FALSE
cg22434786_BC21	-0.0706056	0.00100896	0.000767277	0.999957	chr14	59070436		OpenSea					FALSE
cg00160485_TC21	-0.0437151	0.0010095	0.000767705	0.999957	chr1	7574638		OpenSea					FALSE
cg17561001_BC21	0.0576805	0.00113058	0.000767741	0.999957	chr19	3501787	chr19:3500418-3500842	Shore	TSS1500;TSS1500	ENSG00000129932.10;ENSG00000129932.10			FALSE
cg22660894_BC21	0.0375761	0.00113479	0.000770762	0.999957	chr1	107077038		OpenSea					FALSE
cg07940256_TC21	0.185377	0.00113678	0.000772194	0.999957	chr1	86571112		OpenSea	exon_8;exon_5;TSS200	CLCA4;CLCA4-AS1;ENSG00000016602.9			FALSE
cg22967866_TC21	0.0133909	0.00113745	0.000772675	0.999957	chr1	161226014		OpenSea	exon_1;5UTR;TSS200;TSS200;TSS200;TSS200;TSS200;TSS1500;TSS1500	TOMM40L;TOMM40L;ENSG00000158882.15;ENSG00000158882.15;ENSG00000158882.15;ENSG00000158882.15;ENSG00000158882.15;ENSG00000158882.15;ENSG00000284035.1		Promoter_Associated	TRUE
cg20642800_BC21	0.152433	0.00113808	0.000773127	0.999957	chr15	76057577	chr15:76059343-76060192	Shore	TSS1500;TSS1500	ENSG00000169752.17;ENSG00000169752.17		Unclassified	TRUE
cg05432305_TC21	-0.0144806	0.0010191	0.000775367	0.999957	chr3	33798511	chr3:33798504-33799179	Island	exon_1;TSS200;TSS200;TSS200;TSS200;TSS200;TSS200;TSS200;TSS1500	PDCD6IP-DT;ENSG00000170248.15;ENSG00000170248.15;ENSG00000170248.15;ENSG00000170248.15;ENSG00000170248.15;ENSG00000170248.15;ENSG00000170248.15;ENSG00000170248.15		Promoter_Associated	TRUE
cg06139908_TC11	-0.0117658	0.00102015	0.000776205	0.999957	chr7	54546927	chr7:54544631-54544865;chr7:54546359-54547104	Island	TSS200	ENSG00000170419.11			FALSE
cg10040392_BC21	0.0962331	0.00114324	0.000776835	0.999957	chr5	1243765	chr5:1242329-1242549;chr5:1243534-1243835;chr5:1245786-1246505	Island				Unclassified_Cell_type_specific	TRUE
cg04121731_BC11	-0.0607046	0.00102097	0.00077686	0.999957	chr16	31875602	chr16:31873721-31874279	Shore					FALSE
cg11360689_TC11	0.0385598	0.00114561	0.000778539	0.999957	chr3	52195451	chr3:52197926-52198525	Shelf					FALSE
cg08577953_TC11	0.0144012	0.00114698	0.000779529	0.999957	chr4	99653298	chr4:99651902-99652421;chr4:99653246-99653497	Island	exon_2	C4orf54			FALSE
cg14888445_BC11	0.0116445	0.00114771	0.000780052	0.999957	chr13	100532240	chr13:100532142-100532594	Island	exon_2;exon_3;exon_3	GGACT;GGACT;GGACT			FALSE
cg05681131_TC21	-0.050399	0.0010264	0.000781193	0.999957	chr14	61646049		OpenSea	TSS1500	ENSG00000232774.8			FALSE
cg03024831_BC21	0.0668056	0.00115365	0.000784323	0.999957	chr10	46299545		OpenSea					FALSE
cg21846585_BC21	0.0709696	0.00115398	0.00078456	0.999957	chr16	84333618		OpenSea					FALSE
cg19648729_TC21	0.0890225	0.00115665	0.000786481	0.999957	chr6	53095827		OpenSea					FALSE
cg08229224_BC21	0.11384	0.00116152	0.000789983	0.999957	chr2	197821981		OpenSea					FALSE
cg24275910_TC21	-0.137995	0.00103791	0.000790388	0.999957	chr6	156379934		OpenSea					FALSE
cg23426238_TC12	-0.0450884	0.00104072	0.000792629	0.999957	chr7	103445920	chr7:103445263-103445685;chr7:103445897-103446393	Island	exon_1;TSS1500	SLC26A5-AS1;ENSG00000234715.2			FALSE
cg14493161_BC21	-0.145501	0.0010433	0.000794689	0.999957	chr13	94710753	chr13:94707387-94707620;chr13:94710898-94713797	Shore	exon_1;3UTR	SOX21;SOX21			FALSE
cg25777451_BC21	-0.026078	0.00104398	0.000795235	0.999957	chr6	36358166		OpenSea			chr6:36358063-36358256		FALSE
cg22904401_BC21	0.0520951	0.00117026	0.000796274	0.999957	chr5	93612166		OpenSea					FALSE
cg01160766_TC21	-0.0139053	0.00104569	0.000796601	0.999957	chr17	74203732	chr17:74203793-74204289	Shore	exon_1;exon_1;exon_1;exon_1;exon_1;exon_1;exon_1;5UTR;5UTR;5UTR;5UTR;5UTR	RPL38;RPL38;RPL38;RPL38;RPL38;RPL38;RPL38;RPL38;RPL38;RPL38;RPL38;RPL38		Promoter_Associated	TRUE
cg27503921_BC11	0.0194531	0.00117079	0.000796657	0.999957	chr1	155262498	chr1:155262021-155262521	Island	TSS200;TSS200;TSS1500;TSS1500;TSS200;TSS200	ENSG00000116521.11;ENSG00000116521.11;ENSG00000116521.11;ENSG00000116521.11;ENSG00000116521.11;ENSG00000116521.11		Promoter_Associated	TRUE
cg22548465_TC21	-0.0378032	0.00105516	0.000804171	0.999957	chr17	42349794		OpenSea	TSS1500;TSS1500	ENSG00000168610.16;ENSG00000168610.16			FALSE
cg07916709_BC21	0.0350661	0.00118508	0.000806943	0.999957	chr17	61597910		OpenSea					FALSE
cg24329397_BC21	0.130803	0.00118907	0.000809819	0.999957	chr14	103315433		OpenSea			chr14:103315159-103315667		FALSE
cg00402042_TC21	-0.0861095	0.00106841	0.000814764	0.999957	chr21	27565465		OpenSea					FALSE
cg16649697_BC21	-0.067826	0.00106908	0.000815305	0.999957	chr11	20431113		OpenSea					FALSE
cg09787878_BC21	-0.0296678	0.00107015	0.000816154	0.999957	chr2	238126189	chr2:238128716-238128942	Shelf	TSS1500;TSS1500	ENSG00000144488.15;ENSG00000144488.15			FALSE
cg21542794_BC21	-0.0404065	0.00107133	0.000817102	0.999957	chr2	11134372		OpenSea					FALSE
cg11251297_BC21	-0.101212	0.00107207	0.00081769	0.999957	chr7	74617776		OpenSea					FALSE
cg08417346_TC21	0.109002	0.00120109	0.000818479	0.999957	chr5	180817040		OpenSea	TSS1500;TSS1500;TSS1500;TSS1500;TSS1500;TSS1500	ENSG00000131446.17;ENSG00000131446.17;ENSG00000131446.17;ENSG00000131446.17;ENSG00000131446.17;ENSG00000131446.17	chr5:180817025-180817427		FALSE
cg18464463_TC21	-0.115072	0.00107395	0.000819199	0.999957	chr2	171478477		OpenSea	TSS1500	ENSG00000115827.14			FALSE
cg06882227_BC21	-0.0428841	0.00107489	0.000819952	0.999957	chr6	31964590		OpenSea					FALSE
cg23710432_BC21	-0.0620804	0.001075	0.00082004	0.999957	chr10	46001139		OpenSea					FALSE
cg14583924_TC11	0.139953	0.00120739	0.000823028	0.999957	chr1	34759596	chr1:34761427-34761675	Shore	TSS200	ENSG00000189433.7			FALSE
cg14372606_BC21	0.0586466	0.00120759	0.000823166	0.999957	chr13	31850908	chr13:31846493-31847137	Shelf					FALSE
cg05641641_BC21	-0.246428	0.00107955	0.000823682	0.999957	chr3	146278622		OpenSea					FALSE
cg16654603_BC21	-0.109425	0.00108372	0.000827018	0.999957	chr17	48678060	chr17:48678203-48678644	Shore				Unclassified	TRUE
cg10723746_TC21	-0.087152	0.00108675	0.000829443	0.999957	chr19	2332500	chr19:2328365-2329090;chr19:2334496-2334772	Shore			chr19:2332364-2332648	Promoter_Associated	TRUE
cg10039963_TC21	0.106415	0.00121682	0.000829827	0.999957	chr10	68559544	chr10:68560373-68561065	Shore	TSS1500	ENSG00000138336.9			FALSE
cg23174544_BC21	-0.0348677	0.00108768	0.000830184	0.999957	chr18	3606031		OpenSea				Promoter_Associated_Cell_type_specific	TRUE
cg11198912_BC21	0.023551	0.00121803	0.000830697	0.999957	chr10	357484		OpenSea					FALSE
cg09670485_BC11	-0.0210453	0.00108834	0.000830711	0.999957	chr6	30516289		OpenSea	exon_1	LINC02569		Promoter_Associated_Cell_type_specific	TRUE
cg06346780_BC21	-0.0636096	0.00108839	0.000830754	0.999957	chr21	46156596	chr21:46160578-46162151	Shelf	TSS1500;TSS1500;TSS1500;TSS1500;TSS1500	ENSG00000160282.15;ENSG00000160282.15;ENSG00000160282.15;ENSG00000160282.15;ENSG00000160282.15			FALSE
cg11036338_BC11	0.0106964	0.00122478	0.000835569	0.999957	chr7	92246101	chr7:92245467-92246537	Island	exon_1;exon_1;exon_1;5UTR;5UTR;5UTR;TSS200;TSS200;TSS200;TSS200;TSS200;TSS200;TSS200;TSS200;TSS1500;TSS1500;TSS1500;TSS1500;TSS200;TSS200;TSS200;TSS200;TSS200;TSS200;TSS200;TSS200;TSS200;TSS200;TSS200;TSS200;TSS200;TSS200;TSS200;TSS200;TSS200;TSS200;TSS200;TSS200;TSS200;TSS1500;TSS200;TSS200;TSS200;TSS200;TSS200;TSS1500;TSS200;TSS200;TSS200;TSS200;TSS200;TSS200;TSS1500;TSS200;TSS200;TSS200;TSS200…	KRIT1;KRIT1;ANKIB1;ANKIB1;KRIT1;KRIT1;ENSG00000289027.1;ENSG00000285953.2;ENSG00000285953.2;ENSG00000285953.2;ENSG00000001631.17;ENSG00000001631.17;ENSG00000001631.17;ENSG00000001631.17;ENSG00000001631.17;ENSG00000001631.17;ENSG00000001631.17;ENSG00000001631.17;ENSG00000001631.17;ENSG00000001631.17;ENSG00000001631.17;ENSG00000001631.17;ENSG00000001631.17;ENSG00000001631.17;ENSG00000001631.17;ENSG…			FALSE
cg24548721_BC21	-0.0870014	0.0010948	0.000835892	0.999957	chr19	41453138		OpenSea					FALSE
cg18065752_BC21	-0.024303	0.00109679	0.00083748	0.999957	chr11	73176340		OpenSea	TSS1500	ENSG00000256568.2			FALSE
cg06359077_BC21	0.0254903	0.00122774	0.000837707	0.999957	chr1	156868833		OpenSea					FALSE
cg13001097_TC21	-0.0351113	0.00109832	0.00083871	0.999957	chr6	144331352		OpenSea					FALSE
cg13565624_BC11	-0.0200348	0.00110005	0.000840095	0.999957	chr19	913277	chr19:911689-913715;chr19:917034-920787	Island	TSS200;TSS200;TSS200;TSS200;TSS200;TSS200	ENSG00000198858.10;ENSG00000198858.10;ENSG00000198858.10;ENSG00000198858.10;ENSG00000198858.10;ENSG00000198858.10		Promoter_Associated	TRUE
cg20637923_BC21	0.112618	0.0012311	0.000840135	0.999957	chr3	54901489		OpenSea	TSS1500	ENSG00000243715.1			FALSE
cg18581777_TC11	0.0256067	0.00123213	0.000840877	0.999957	chr15	74812845		OpenSea	exon_1;exon_1;exon_1;exon_1;exon_1;exon_1;5UTR;5UTR;TSS200	LMAN1L;LMAN1L;LMAN1L;LMAN1L;LMAN1L;LMAN1L;LMAN1L;LMAN1L;ENSG00000140506.17			FALSE
cg14982203_BC21	-0.0394646	0.00110239	0.000841968	0.999957	chr14	89618100	chr14:89619021-89619367	Shore				Promoter_Associated	TRUE
cg15893955_BC21	-0.154096	0.00110249	0.000842051	0.999957	chr11	1034286	chr11:1031751-1032001;chr11:1033084-1033356;chr11:1034834-1035146;chr11:1036420-1036827	Shore	TSS1500	ENSG00000184956.16		Unclassified_Cell_type_specific	TRUE
cg14274204_TC21	0.0300922	0.00123436	0.000842483	0.999957	chr11	72093540		OpenSea	exon_2;exon_2;exon_4;exon_4;exon_4;exon_4;exon_3;exon_4;exon_5;exon_5;exon_2;exon_2;exon_2;exon_3;exon_4;exon_4;exon_4;exon_5;exon_4;exon_5;exon_4;exon_3;exon_3;5UTR;3UTR;5UTR;3UTR;5UTR;3UTR;5UTR;TSS1500	LRTOMT;LRTOMT;LRTOMT;LRTOMT;LRTOMT;LRTOMT;LRRC51;LRRC51;LRRC51;LRRC51;LRRC51;LRRC51;LRRC51;LRRC51;LRRC51;LRRC51;LRRC51;LRRC51;LRRC51;LRRC51;LRRC51;LRRC51;LRRC51;LRTOMT;LRRC51;LRRC51;LRRC51;LRRC51;LRRC51;LRTOMT;ENSG00000184154.16			FALSE
cg23208791_TC21	-0.0710857	0.00110744	0.00084601	0.999957	chr1	98658177	chr1:98661316-98662155	Shelf					FALSE
cg17386710_BC11	-0.294498	0.00110834	0.000846735	0.999957	chr7	70787349	chr7:70789908-70791000	Shelf	exon_18;exon_18;exon_17;exon_14;exon_13;exon_13;exon_12;exon_12;exon_4;exon_3;exon_1;5UTR	AUTS2;AUTS2;AUTS2;AUTS2;AUTS2;AUTS2;AUTS2;AUTS2;AUTS2;AUTS2;AUTS2;AUTS2			FALSE
cg19151849_BC11	0.015058	0.00124174	0.000847814	0.999957	chr3	12841646	chr3:12841035-12841574	Shore	TSS200;TSS200;TSS200;TSS200;TSS200;TSS200;TSS200;TSS1500;TSS1500	ENSG00000144713.13;ENSG00000144713.13;ENSG00000144713.13;ENSG00000144713.13;ENSG00000144713.13;ENSG00000144713.13;ENSG00000144713.13;ENSG00000144713.13;ENSG00000207496.1		Promoter_Associated	TRUE
cg04546243_TC21	0.0114174	0.00124284	0.000848608	0.999957	chr3	11582395		OpenSea	TSS200	ENSG00000144560.16		Unclassified_Cell_type_specific	TRUE
cg22697223_TC21	0.104402	0.0012444	0.000849739	0.999957	chr14	38005910		OpenSea	TSS1500	ENSG00000258696.1			FALSE
cg07155684_TC21	-0.0946725	0.00111421	0.000851438	0.999957	chr4	177443736	chr4:177442085-177442554	Shore	TSS1500;TSS1500;TSS1500;TSS1500;TSS1500	ENSG00000038002.9;ENSG00000038002.9;ENSG00000038002.9;ENSG00000038002.9;ENSG00000250131.2			FALSE
cg25931721_TC21	0.0475137	0.00124691	0.000851552	0.999957	chr12	120012001		OpenSea					FALSE
cg11488093_BC11	0.0601454	0.00124777	0.000852174	0.999957	chr5	145429580		OpenSea	TSS1500;TSS1500;TSS1500;TSS1500;TSS1500	ENSG00000248125.2;ENSG00000248125.2;ENSG00000248125.2;ENSG00000248125.2;ENSG00000248125.2			FALSE
cg03401904_BC21	0.0436261	0.00124784	0.000852218	0.999957	chr2	120300620		OpenSea					FALSE
cg10993701_TC21	-0.0842097	0.00111665	0.000853392	0.999957	chr12	51266251	chr12:51269620-51270627	Shelf					FALSE
cg10692136_BC21	-0.08383	0.00111719	0.000853826	0.999957	chr16	17367262		OpenSea				Unclassified_Cell_type_specific	TRUE
cg09239245_TC21	0.130929	0.00125015	0.000853893	0.999957	chr6	18749096		OpenSea					FALSE
cg13097481_BC21	0.0393836	0.00125203	0.000855253	0.999957	chr8	126301143		OpenSea					FALSE
cg05905868_BC21	-0.117335	0.00111903	0.000855301	0.999957	chr3	183699300	chr3:183697814-183698281	Shore					FALSE
cg25151936_BC21	0.0371451	0.00125248	0.000855577	0.999957	chr14	70472879		OpenSea					FALSE
cg17495671_BC21	-0.101048	0.00112286	0.000858376	0.999957	chr2	215748824		OpenSea					FALSE
cg25835239_TC21	-0.0512899	0.00112419	0.000859438	0.999957	chr17	46998804		OpenSea	exon_5;exon_4;exon_5;exon_6;exon_5;exon_6	ENSG00000262879;ENSG00000262879;ENSG00000262879;ENSG00000262879;ENSG00000262879;ENSG00000262879			FALSE
cg24218148_TC21	-0.0121678	0.00112493	0.00086003	0.999957	chr19	16367602		OpenSea	exon_1	ENSG00000290070		Unclassified	TRUE
cg22218407_TC21	0.0295902	0.00126276	0.000863007	0.999957	chr1	41779893		OpenSea					FALSE
cg19172665_BC21	0.0698059	0.00126354	0.000863571	0.999957	chr4	143696966	chr4:143699669-143701065	Shelf	exon_1	FREM3			FALSE
cg21233460_TC21	0.0474522	0.00126361	0.00086362	0.999957	chr8	94640011	chr8:94638978-94639532;chr8:94640227-94640645;chr8:94641670-94642505	Shore	TSS1500;TSS1500;TSS1500;TSS1500;TSS1500;TSS1500	ENSG00000261437.1;ENSG00000104413.18;ENSG00000104413.18;ENSG00000104413.18;ENSG00000104413.18;ENSG00000104413.18		Unclassified_Cell_type_specific	TRUE
cg17942426_BC21	-0.0216721	0.00112986	0.000863987	0.999957	chr2	168890494	chr2:168890209-168890495	Island	TSS1500;TSS200	ENSG00000152253.9;ENSG00000152253.9		Promoter_Associated	TRUE
cg04959182_BC21	0.0762233	0.0012656	0.000865058	0.999957	chr2	86542932		OpenSea	TSS200;TSS1500	ENSG00000115561.16;ENSG00000115561.16			FALSE
cg09750262_BC21	-0.104451	0.00113312	0.000866601	0.999957	chr17	7246837	chr17:7242160-7243390	Shelf	exon_3;exon_4;exon_5;exon_4;exon_5;exon_4;exon_5;exon_4;exon_5;exon_4;3UTR;5UTR;3UTR;TSS200	CTDNEP1;CTDNEP1;CTDNEP1;CTDNEP1;CTDNEP1;CTDNEP1;CTDNEP1;CTDNEP1;CTDNEP1;ENSG00000262302;CTDNEP1;CTDNEP1;ENSG00000262302;ENSG00000175826.12			FALSE
cg21658616_TC11	0.00972169	0.00126981	0.0008681	0.999957	chr19	5214582	chr19:5210553-5210853;chr19:5212136-5212473	Shelf	exon_21;exon_29;exon_28;exon_23;exon_19	PTPRS;PTPRS;PTPRS;PTPRS;PTPRS		Unclassified_Cell_type_specific	TRUE
cg25292199_BC21	-0.0312776	0.00113607	0.000868967	0.999957	chr20	44011698		OpenSea				Unclassified_Cell_type_specific	TRUE
cg25219033_BC21	-0.0575574	0.00113662	0.000869409	0.999957	chr20	36834499		OpenSea				Unclassified_Cell_type_specific	TRUE
cg13796295_TC21	-0.0522329	0.00113703	0.000869739	0.999957	chr14	24338452	chr14:24334600-24335147;chr14:24339429-24339786	Shore	exon_4;exon_4;exon_3;TSS1500;TSS1500	RIPK3;RIPK3;RIPK3;ENSG00000258973.1;ENSG00000129465.16			FALSE
cg03692576_BC21	0.0898811	0.00127487	0.000871761	0.999957	chr11	30210513		OpenSea					FALSE
cg09368794_TC21	-0.017784	0.00113992	0.00087206	0.999957	chr6	31761871		OpenSea	exon_23;exon_23;exon_18;exon_23;exon_22;exon_20;exon_12;exon_6;exon_3;exon_23;3UTR;5UTR;TSS200;TSS1500;TSS1500;TSS1500	MSH5;MSH5;MSH5;MSH5;MSH5;MSH5;MSH5;MSH5;MSH5;MSH5-SAPCD1;MSH5;MSH5;ENSG00000204410.16;ENSG00000255152.8;ENSG00000228727.10;ENSG00000228727.10			FALSE
cg23961389_BC21	0.0561474	0.00127622	0.000872736	0.999957	chr9	131669931		OpenSea					FALSE
cg19179452_BC21	0.288754	0.00127665	0.000873053	0.999957	chr13	111663930		OpenSea					FALSE
ch.4.183293081R_BC21	0.0184292	0.00127898	0.000874733	0.999957	chr4	182134934		OpenSea					FALSE
cg00025591_TC21	0.0946501	0.00127988	0.000875386	0.999957	chr21	46606130		OpenSea	TSS1500;TSS1500	ENSG00000160307.10;ENSG00000160307.10		Unclassified_Cell_type_specific	TRUE
cg21108841_TC11	-0.0139858	0.00114652	0.000877351	0.999957	chr4	24913128	chr4:24912611-24913255	Island	TSS200;TSS1500;TSS200	ENSG00000181982.20;ENSG00000181982.20;ENSG00000181982.20			FALSE
cg18817318_BC21	-0.132398	0.00114659	0.00087741	0.999957	chr13	76991740	chr13:76991923-76992464	Shore	exon_1;5UTR;TSS1500;TSS1500;TSS1500;TSS1500;TSS1500;TSS1500;TSS1500;TSS1500;TSS1500;TSS1500;TSS1500;TSS1500;TSS1500;TSS1500;TSS1500	CLN5;CLN5;ENSG00000102805.16;ENSG00000102805.16;ENSG00000102805.16;ENSG00000102805.16;ENSG00000102805.16;ENSG00000102805.16;ENSG00000102805.16;ENSG00000102805.16;ENSG00000102805.16;ENSG00000102805.16;ENSG00000102805.16;ENSG00000102805.16;ENSG00000102805.16;ENSG00000102805.16;ENSG00000283208.2		Promoter_Associated	TRUE
cg04148945_BC21	-0.038124	0.00114784	0.000878415	0.999957	chr5	172047734		OpenSea					FALSE
cg21554704_TC21	-0.109526	0.00114895	0.000879307	0.999957	chr2	224417291		OpenSea					FALSE
cg20005056_BC21	0.184335	0.00128798	0.00088125	0.999957	chr2	26176125	chr2:26172547-26174335;chr2:26178826-26179150	Shore				Unclassified_Cell_type_specific	TRUE
cg18578732_TC21	-0.0753639	0.00115159	0.00088142	0.999957	chr3	55609991		OpenSea	TSS1500	ENSG00000240777.2			FALSE
cg15165735_TC21	0.0334347	0.00128835	0.000881514	0.999957	chr3	99670636		OpenSea					FALSE
cg25795774_TC21	-0.0422475	0.00115276	0.000882363	0.999957	chr21	29295079	chr21:29298423-29299465	Shelf				Unclassified_Cell_type_specific	TRUE
cg20970354_BC11	0.117349	0.0012905	0.000883073	0.999957	chr5	176775214		OpenSea					FALSE
cg18097321_TC21	0.139025	0.0012922	0.000884305	0.999957	chr18	21184405		OpenSea	TSS1500	ENSG00000263748.1			FALSE
cg20569019_BC11	0.0551873	0.00129327	0.000885079	0.999957	chr15	69566057		OpenSea	TSS1500	ENSG00000259457.1			FALSE
cg27500292_TC21	0.0844146	0.00129424	0.000885784	0.999957	chr20	17525532		OpenSea					FALSE
cg10995226_BC21	0.152198	0.00129609	0.00088712	0.999957	chr13	85197179		OpenSea					FALSE
cg14943512_BC21	0.0151529	0.00129652	0.000887428	0.999957	chr6	36127741	chr6:36130262-36130844	Shelf	TSS200	ENSG00000156711.17			FALSE
cg07365343_BC21	0.0976235	0.0013002	0.000890093	0.999957	chr10	109248939		OpenSea					FALSE
cg26186509_BC21	0.0866711	0.00130179	0.000891251	0.999957	chr2	135820084		OpenSea	TSS200	ENSG00000226806.1		Unclassified_Cell_type_specific	TRUE
cg25533393_BC21	0.149704	0.00130217	0.000891526	0.999957	chr4	188163012	chr4:188159694-188160093	Shelf					FALSE
cg22507960_BC21	-0.191169	0.00116458	0.000891858	0.999957	chr5	83078115	chr5:83077283-83077528	Shore	TSS1500;TSS1500;TSS1500;TSS1500;TSS1500	ENSG00000174695.10;ENSG00000174695.10;ENSG00000174695.10;ENSG00000174695.10;ENSG00000174695.10		Promoter_Associated	TRUE
cg16756868_TC11	0.0616473	0.00130437	0.000893117	0.999957	chr2	98772174		OpenSea	exon_1;exon_1;exon_1;exon_1	LINC02611;LINC02611;LINC02611;LINC02611		Promoter_Associated_Cell_type_specific	TRUE
cg19289355_BC11	0.0333708	0.00130749	0.000895379	0.999957	chr7	127619958		OpenSea			chr7:127619716-127620111		FALSE
cg07285641_TC21	0.0270936	0.00130789	0.000895666	0.999957	chr13	51771166		OpenSea	exon_8;3UTR	DHRS12;DHRS12			FALSE
cg11234339_TC21	-0.162254	0.00117116	0.000897138	0.999957	chr11	10885901		OpenSea					FALSE
cg05478905_BC21	-0.0639543	0.00117205	0.000897858	0.999957	chr12	71426814		OpenSea					FALSE
cg14096144_BC21	-0.0170527	0.00117393	0.000899368	0.999957	chr9	109795719		OpenSea					FALSE
cg10307310_BC21	-0.0852915	0.00117537	0.000900521	0.999957	chr8	23290870	chr8:23288015-23288493	Shelf	TSS200	ENSG00000104679.12			FALSE
cg17523461_TC11	-0.0102137	0.00117648	0.000901412	0.999957	chr13	51453252	chr13:51451555-51453810	Island	TSS200;TSS1500;TSS1500;TSS1500;TSS1500;TSS1500;TSS1500;TSS200;TSS200;TSS1500;TSS1500;TSS1500;TSS1500;TSS1500;TSS1500;TSS1500;TSS1500;TSS1500;TSS1500;TSS1500;TSS1500;TSS1500;TSS1500;TSS1500;TSS1500;TSS1500;TSS1500;TSS1500;TSS1500;TSS1500;TSS1500	ENSG00000102786.15;ENSG00000102786.15;ENSG00000102786.15;ENSG00000102786.15;ENSG00000102786.15;ENSG00000102786.15;ENSG00000102786.15;ENSG00000236778.8;ENSG00000236778.8;ENSG00000236778.8;ENSG00000236778.8;ENSG00000236778.8;ENSG00000236778.8;ENSG00000236778.8;ENSG00000236778.8;ENSG00000236778.8;ENSG00000236778.8;ENSG00000236778.8;ENSG00000236778.8;ENSG00000236778.8;ENSG00000236778.8;ENSG0000023677…		Promoter_Associated	TRUE
cg17425580_TC21	0.167033	0.001319	0.000903719	0.999957	chr1	20194608		OpenSea	exon_2;3UTR	UBXN10;UBXN10		Unclassified	TRUE
cg17577923_TC11	0.0183482	0.00132031	0.000904663	0.999957	chr7	12687618	chr7:12686531-12687623	Island	exon_1;exon_1;5UTR;5UTR;TSS200;TSS200	ARL4A;ARL4A;ARL4A;ARL4A;ENSG00000122644.13;ENSG00000122644.13		Promoter_Associated	TRUE
cg04445730_BC21	0.0316431	0.00132057	0.000904852	0.999957	chr4	8042062		OpenSea	TSS1500	ENSG00000163995.21			FALSE
cg07700258_BC11	-0.00845617	0.00118132	0.000905302	0.999957	chr1	228140028	chr1:228139807-228140859	Island	exon_1;5UTR;TSS200;TSS1500;TSS200;TSS1500;TSS1500;TSS1500;TSS1500;TSS1500;TSS1500;TSS1500;TSS1500;TSS1500;TSS1500;TSS1500;TSS1500;TSS1500;TSS1500;TSS1500;TSS1500;TSS1500;TSS1500;TSS1500;TSS1500;TSS1500;TSS1500	GUK1;GUK1;ENSG00000143774.17;ENSG00000143774.17;ENSG00000143774.17;ENSG00000143774.17;ENSG00000143774.17;ENSG00000143774.17;ENSG00000143774.17;ENSG00000143774.17;ENSG00000143774.17;ENSG00000143774.17;ENSG00000143774.17;ENSG00000143774.17;ENSG00000143774.17;ENSG00000143774.17;ENSG00000143774.17;ENSG00000143774.17;ENSG00000143774.17;ENSG00000143774.17;ENSG00000143774.17;ENSG00000143774.17;ENSG00000…		Promoter_Associated	TRUE
cg22254951_TC21	-0.0271171	0.00118135	0.00090533	0.999957	chr17	17168839		OpenSea	exon_2;TSS1500	ENSG00000263624;ENSG00000206859.1			FALSE
cg06706115_TC21	-0.0490196	0.00118539	0.000908574	0.999957	chr6	158060638		OpenSea			chr6:158060515-158060676	Unclassified_Cell_type_specific	TRUE
cg05651657_TC11	-0.0411087	0.00118788	0.000910581	0.999957	chr3	32467839	chr3:32467773-32468033	Island				Unclassified	TRUE
cg25164495_BC11	0.0111296	0.00132931	0.000911189	0.999957	chr2	87077093	chr2:87075399-87077448	Island	TSS1500;TSS1500	ENSG00000285793.1;ENSG00000266931.2		Promoter_Associated_Cell_type_specific	TRUE
cg22876812_TC11	0.0136721	0.00133033	0.000911931	0.999957	chr2	70889058	chr2:70887603-70888344;chr2:70888797-70889282	Island					FALSE
cg18845801_TC11	0.00633069	0.00133121	0.000912571	0.999957	chr7	16753713	chr7:16753639-16754475	Island	TSS200	ENSG00000106537.8		Unclassified_Cell_type_specific	TRUE
cg19763454_BC21	0.066563	0.00133387	0.000914498	0.999957	chr1	6574691		OpenSea	exon_3;exon_2	TAS1R1;TAS1R1			FALSE
cg05740427_BC21	0.0117221	0.00133497	0.000915293	0.999957	chr2	65432802	chr2:65430634-65432852;chr2:65435780-65436745	Island	TSS1500;TSS200	ENSG00000198369.10;ENSG00000198369.10		Promoter_Associated	TRUE
cg17336354_TC21	0.0901124	0.00133585	0.000915937	0.999957	chr3	34257413		OpenSea					FALSE
cg07601874_BC21	0.0610208	0.00133749	0.000917125	0.999957	chr21	42561459		OpenSea	exon_1	ENSG00000235772			FALSE
cg02459859_BC21	-0.0224519	0.00119649	0.000917504	0.999957	chr16	737266	chr16:734367-735034;chr16:737070-737327;chr16:740211-741332	Island	exon_1;exon_3;exon_2;exon_3;exon_2;exon_3;exon_3;exon_2;exon_1;exon_4;exon_3;exon_3;exon_4;exon_3;5UTR;3UTR;5UTR;3UTR;3UTR;5UTR;5UTR;5UTR;TSS1500	CIAO3;CIAO3;CIAO3;CIAO3;CIAO3;CIAO3;CIAO3;CIAO3;CIAO3;CIAO3;CIAO3;CIAO3;CIAO3;CIAO3;CIAO3;CIAO3;CIAO3;CIAO3;CIAO3;CIAO3;CIAO3;CIAO3;ENSG00000103245.14			FALSE
cg21465162_TC21	0.124248	0.00134085	0.000919562	0.999957	chr9	83708447	chr9:83707102-83708248	Shore	exon_1;exon_1;TSS1500;TSS1500;TSS1500	UBQLN1-AS1;UBQLN1-AS1;ENSG00000135018.14;ENSG00000135018.14;ENSG00000135018.14		Promoter_Associated	TRUE
cg01520892_TC21	0.0376708	0.00134323	0.000921288	0.999957	chr8	125957844		OpenSea				NonGene_Associated_Cell_type_specific	TRUE
cg06332255_TC21	0.0621923	0.00134377	0.00092168	0.999957	chr20	16407332		OpenSea					FALSE
cg05445229_BC21	-0.0974325	0.00120336	0.00092303	0.999957	chr3	124760441		OpenSea					FALSE
cg00155593_BC11	0.00735249	0.00134631	0.000923521	0.999957	chr15	60398080	chr15:60397550-60398231;chr15:60398509-60398731	Island	TSS200;TSS200;TSS200;TSS200;TSS200;TSS200;TSS200;TSS200;TSS200;TSS200;TSS200;TSS200;TSS200;TSS200;TSS200;TSS200;TSS200;TSS200;TSS200;TSS200;TSS200;TSS200;TSS1500;TSS200;TSS200;TSS200;TSS200;TSS200;TSS200;TSS200;TSS200;TSS200;TSS200;TSS200;TSS200;TSS200;TSS200	ENSG00000182718.18;ENSG00000182718.18;ENSG00000182718.18;ENSG00000182718.18;ENSG00000182718.18;ENSG00000182718.18;ENSG00000182718.18;ENSG00000182718.18;ENSG00000182718.18;ENSG00000182718.18;ENSG00000182718.18;ENSG00000182718.18;ENSG00000182718.18;ENSG00000182718.18;ENSG00000182718.18;ENSG00000182718.18;ENSG00000182718.18;ENSG00000182718.18;ENSG00000182718.18;ENSG00000182718.18;ENSG00000182718.18;…		Unclassified	TRUE
cg22442843_TC21	-0.0850798	0.00120398	0.000923529	0.999957	chr17	34443949		OpenSea					FALSE
cg22945845_TC21	0.0383794	0.00134696	0.000923993	0.999957	chr17	75181628	chr17:75181967-75183185	Shore				Unclassified	TRUE
cg09262230_TC11	-0.288668	0.00120495	0.000924304	0.999957	chr6	158631905		OpenSea	exon_17;exon_17;3UTR;3UTR	TMEM181;TMEM181;TMEM181;TMEM181			FALSE
cg24265258_TC21	-0.355312	0.00120599	0.000925146	0.999957	chr19	18432459	chr19:18428971-18429531;chr19:18433018-18438351	Shore	TSS1500	ENSG00000130511.16			FALSE
cg18007899_BC21	0.0155878	0.0013486	0.000925182	0.999957	chr9	97634131	chr9:97633058-97634132	Island	TSS1500;TSS1500	ENSG00000136925.15;ENSG00000136925.15		Promoter_Associated	TRUE
cg06929724_BC21	0.134635	0.00135413	0.000929198	0.999957	chr13	97338868		OpenSea					FALSE
cg26161368_BC11	0.117052	0.00135567	0.000930318	0.999957	chr5	91722874		OpenSea					FALSE
cg10352719_BC21	0.0158657	0.00135646	0.000930889	0.999957	chr14	24300198	chr14:24299414-24300158	Shore	exon_1;exon_1;TSS1500;TSS1500;TSS1500;TSS1500;TSS1500;TSS1500;TSS1500;TSS1500	NOP9;NOP9;ENSG00000157379.14;ENSG00000157379.14;ENSG00000157379.14;ENSG00000157379.14;ENSG00000157379.14;ENSG00000157379.14;ENSG00000157379.14;ENSG00000196943.14		Promoter_Associated	TRUE
cg13923747_BC21	0.0661274	0.00135929	0.000932948	0.999957	chr9	91873779		OpenSea					FALSE
cg02891945_BC21	0.116439	0.00135979	0.000933305	0.999957	chr16	85829841	chr16:85829775-85829995	Island					FALSE
cg04112366_TC21	0.124287	0.00136197	0.000934893	0.999957	chr9	97846680	chr9:97848414-97849235	Shore					FALSE
cg16518614_TC21	-0.0667551	0.00121979	0.000936253	0.999957	chr7	45260089		OpenSea				Unclassified	TRUE
cg14287794_BC21	-0.0403074	0.00121982	0.000936275	0.999957	chr2	162177884		OpenSea	TSS1500	ENSG00000078098.15			FALSE
cg19866404_TC21	-0.0355828	0.00122234	0.000938307	0.999957	chr1	24197212		OpenSea					FALSE
cg03170099_BC21	-0.0325643	0.00122442	0.000939979	0.999957	chr22	32725411		OpenSea					FALSE
cg06437896_BC21	-0.0291959	0.00122453	0.000940063	0.999957	chr7	101241956	chr7:101244788-101245207	Shelf	TSS200;TSS1500	ENSG00000214253.9;ENSG00000214253.9			FALSE
cg08804228_BC21	-0.0515833	0.0012247	0.000940202	0.999957	chr9	134731881		OpenSea					FALSE
cg14127643_BC21	0.206614	0.00137641	0.000945377	0.999957	chr9	113158081		OpenSea	exon_3	SLC31A2			FALSE
cg21661344_TC11	0.0368833	0.00137738	0.000946082	0.999957	chr19	632827	chr19:632697-633678	Island				Promoter_Associated	TRUE
cg25131591_TC21	-0.107897	0.00123465	0.000948218	0.999957	chr13	25263054		OpenSea	TSS1500	ENSG00000139505.12			FALSE
cg21336938_TC21	0.108371	0.00138227	0.000949637	0.999957	chr3	146589370		OpenSea	TSS1500	ENSG00000241457.1			FALSE
cg04820386_BC11	0.010478	0.00138424	0.000951067	0.999957	chr17	752549	chr17:751786-753467	Island	TSS1500;TSS200;TSS200;TSS1500;TSS1500;TSS1500;TSS1500	ENSG00000179409.11;ENSG00000231784.8;ENSG00000231784.8;ENSG00000231784.8;ENSG00000179409.11;ENSG00000179409.11;ENSG00000179409.11		Promoter_Associated	TRUE
cg25599242_BC21	-0.0350267	0.0012401	0.000952609	0.999957	chr11	63536865		OpenSea	exon_1;exon_1;exon_1;exon_1;5UTR;5UTR	PLAAT4;PLAAT4;PLAAT4;PLAAT4;PLAAT4;PLAAT4		Promoter_Associated	TRUE
cg06824795_TC21	0.0943616	0.00138847	0.000954144	0.999957	chr20	33178324		OpenSea					FALSE
cg12459358_TC11	0.0158818	0.00139021	0.000955411	0.999957	chr17	7296577	chr17:7294112-7295098;chr17:7296391-7296690	Island				Unclassified	TRUE
cg17550721_BC21	-0.0864538	0.0012469	0.000958082	0.999957	chr5	176948407		OpenSea					FALSE
cg11973514_TC21	0.0904498	0.00139458	0.000958588	0.999957	chr1	243841587		OpenSea					FALSE
cg11654530_BC21	0.0710747	0.00139485	0.000958782	0.999957	chr20	40855234		OpenSea	TSS1500	ENSG00000238908.1			FALSE
cg03851155_BC21	-0.0323474	0.00124805	0.000959009	0.999957	chr16	69105726	chr16:69109596-69110016;chr16:69105725-69107997	Island	exon_1;5UTR;TSS1500;TSS1500;TSS1500	HAS3;HAS3;ENSG00000103044.11;ENSG00000103044.11;ENSG00000103044.11		Unclassified_Cell_type_specific	TRUE
cg09962002_BC21	0.0568914	0.00139712	0.000960435	0.999957	chr6	110841512		OpenSea					FALSE
cg24485614_BC21	-0.0688706	0.00125629	0.000965657	0.999957	chr22	35921447		OpenSea					FALSE
cg18342939_TC21	-0.140082	0.00125643	0.000965767	0.999957	chr3	134484566	chr3:134485678-134486597	Shore	TSS1500;TSS1500;TSS1500;TSS1500;TSS1500;TSS1500;TSS1500;TSS1500;TSS1500;TSS1500;TSS1500;TSS1500;TSS1500;TSS1500;TSS1500;TSS1500;TSS1500;TSS1500;TSS1500;TSS1500;TSS1500;TSS1500;TSS1500;TSS1500;TSS1500;TSS1500;TSS1500;TSS1500	ENSG00000129055.13;ENSG00000182923.20;ENSG00000182923.20;ENSG00000182923.20;ENSG00000182923.20;ENSG00000182923.20;ENSG00000182923.20;ENSG00000182923.20;ENSG00000182923.20;ENSG00000182923.20;ENSG00000182923.20;ENSG00000182923.20;ENSG00000182923.20;ENSG00000182923.20;ENSG00000182923.20;ENSG00000182923.20;ENSG00000182923.20;ENSG00000182923.20;ENSG00000182923.20;ENSG00000182923.20;ENSG00000182923.20;…			FALSE
cg26964629_BC21	-0.0545801	0.00125705	0.000966269	0.999957	chr5	6755326		OpenSea	exon_13;exon_7;3UTR	TENT4A;TENT4A;TENT4A			FALSE
cg15991175_BC22	-0.0481206	0.00125979	0.000968473	0.999957	chr3	52279907	chr3:52278053-52279041	Shore	TSS1500	ENSG00000164091.12			FALSE
cg13351406_TC21	-0.0722856	0.00126102	0.000969468	0.999957	chr22	35635194		OpenSea	TSS200	ENSG00000268818.2			FALSE
cg26202612_BC21	0.133118	0.00141167	0.000971019	0.999957	chr22	29661299		OpenSea	exon_9;exon_8;exon_8;exon_7;exon_8;exon_8;exon_8;exon_6;exon_6;exon_3;exon_7;exon_8;exon_9;3UTR;5UTR	NF2;NF2;NF2;NF2;NF2;NF2;NF2;NF2;NF2;NF2;NF2;NF2;NF2;NF2;NF2			FALSE
cg04077069_TC21	0.0117832	0.00141173	0.000971061	0.999957	chr7	151520073	chr7:151518982-151520815	Island	exon_1;5UTR;TSS200;TSS1500;TSS1500	RHEB;RHEB;ENSG00000106615.10;ENSG00000106615.10;ENSG00000106615.10		Unclassified	TRUE
cg11988679_BC21	-0.0352468	0.00126602	0.0009735	0.999957	chr6	132490187		OpenSea			chr6:132490141-132490351		FALSE
cg09072291_BC21	-0.127597	0.00126628	0.000973709	0.999957	chr2	172927817		OpenSea	TSS1500;TSS1500	ENSG00000091428.18;ENSG00000091428.18			FALSE
cg24209880_BC21	-0.0675455	0.00126659	0.000973962	0.999957	chr9	72039588		OpenSea				Unclassified	TRUE
cg26447622_TC21	-0.0220399	0.00126694	0.000974242	0.999957	chr19	49994151		OpenSea	TSS1500	ENSG00000105053.11			FALSE
cg02075405_TC11	-0.00585644	0.00126741	0.000974621	0.999957	chr6	31581080	chr6:31580659-31581500	Island	exon_3;exon_3;exon_4;exon_2;3UTR	LTB;LTB;LTB;LTB;LTB		Promoter_Associated	TRUE
cg15159104_BC21	0.0172991	0.00141824	0.000975797	0.999957	chr15	43517667		OpenSea	exon_1;5UTR	MAP1A;MAP1A			FALSE
cg26468087_BC21	-0.0355002	0.0012702	0.000976867	0.999957	chr22	46100751		OpenSea					FALSE
cg14380519_TC21	0.137875	0.00142142	0.00097811	0.999957	chr9	76901946	chr9:76905887-76906592	Shelf					FALSE
cg15584088_TC11	-0.0427783	0.00127259	0.000978802	0.999957	chr15	97224350		OpenSea	TSS200	ENSG00000259485.2			FALSE
cg14582158_TC21	-0.179157	0.00127614	0.000981666	0.999957	chr10	3779487	chr10:3781597-3781825	Shelf	exon_2;exon_4;exon_3;exon_3;3UTR;3UTR	KLF6;KLF6;KLF6;KLF6;KLF6;KLF6			FALSE
cg03383796_TC21	0.0403883	0.00142722	0.000982338	0.999957	chr8	73273081		OpenSea					FALSE
cg15812115_TC21	0.0551195	0.00142887	0.000983538	0.999957	chr5	2095242		OpenSea					FALSE
cg14277298_TC21	-0.0772695	0.00128083	0.000985447	0.999957	chr9	32455912		OpenSea	exon_19;exon_18;exon_17;exon_17;exon_20;exon_19;3UTR;3UTR;3UTR;3UTR;3UTR;3UTR	DDX58;DDX58;DDX58;DDX58;ENSG00000288684;ENSG00000288684;DDX58;DDX58;DDX58;DDX58;ENSG00000288684;ENSG00000288684			FALSE
cg21313700_BC21	-0.0296391	0.00128263	0.000986901	0.999957	chr8	143834570	chr8:143835842-143836148	Shore	exon_18;exon_17;exon_13;exon_8;exon_2;3UTR;TSS1500	NRBP2;NRBP2;NRBP2;NRBP2;NRBP2;NRBP2;ENSG00000255343.1			FALSE
cg26782748_TC21	0.0565318	0.00143412	0.000987362	0.999957	chr20	54122320		OpenSea			chr20:54122282-54122543		FALSE
cg03621423_BC21	0.120553	0.00143501	0.000988006	0.999957	chr22	43447430		OpenSea					FALSE
cg07234986_BC21	-0.100864	0.00128479	0.000988638	0.999957	chr12	85179730		OpenSea					FALSE
cg10543106_BC21	0.057618	0.00143613	0.000988821	0.999957	chr7	1649252	chr7:1647080-1647372	Shore					FALSE
cg01218508_BC21	0.0422202	0.0014413	0.000992593	0.999957	chr1	112988822		OpenSea					FALSE
cg25961807_BC21	-0.0395505	0.00129068	0.000993392	0.999957	chr4	150033317		OpenSea					FALSE
cg14928873_BC21	-0.0628282	0.00129128	0.000993877	0.999957	chr12	80632214		OpenSea	exon_35;exon_34;TSS200	PTPRQ;PTPRQ;ENSG00000139304.16			FALSE
cg14325671_TC21	0.0496032	0.00144755	0.000997141	0.999957	chr9	129830872		OpenSea	exon_6;exon_3;exon_3;exon_5;TSS200	C9orf78;C9orf78;C9orf78;C9orf78;ENSG00000136819.15			FALSE
cg07693262_TC21	0.111713	0.00145026	0.000999118	0.999957	chr6	37657253	chr6:37658250-37658670	Shore					FALSE
cg23508908_TC21	0.165818	0.00145089	0.00099958	0.999957	chr6	84062064		OpenSea					FALSE
cg16394191_BC21	-0.035089	0.00129908	0.00100018	0.999957	chr15	68596204		OpenSea					FALSE
cg08664966_TC21	0.0129534	0.00145239	0.00100067	0.999957	chr12	13825768		OpenSea			chr12:13825565-13825832		FALSE
cg21480628_BC21	0.124674	0.00145283	0.00100099	0.999957	chr14	88715186		OpenSea	exon_9;exon_9;TSS200	EML5;EML5;ENSG00000165521.16			FALSE
cg18106171_TC11	-0.0494003	0.00130561	0.00100545	0.999957	chr1	161226418		OpenSea	exon_2;exon_2;exon_2;exon_2;exon_2;exon_1;5UTR;5UTR;5UTR;TSS1500;TSS1500	TOMM40L;TOMM40L;TOMM40L;TOMM40L;TOMM40L;TOMM40L;TOMM40L;TOMM40L;TOMM40L;ENSG00000158882.15;ENSG00000284035.1		Promoter_Associated	TRUE
cg05367863_BC21	-0.136691	0.00130581	0.00100561	0.999957	chr2	158755982		OpenSea					FALSE
cg19273756_TC11	-0.16305	0.00130727	0.00100679	0.999957	chr17	59152330	chr17:59154494-59155294	Shelf	TSS1500;TSS1500	ENSG00000182628.13;ENSG00000207996.1			FALSE
cg14452640_TC21	-0.163317	0.00130779	0.00100721	0.999957	chr19	57560811	chr19:57559185-57559905	Shore	TSS1500;TSS1500;TSS1500;TSS1500;TSS1500;TSS1500	ENSG00000251369.10;ENSG00000251369.10;ENSG00000251369.10;ENSG00000251369.10;ENSG00000251369.10;ENSG00000251369.10			FALSE
cg21341499_TC21	0.053386	0.00146611	0.00101067	0.999957	chr4	161763077		OpenSea					FALSE
cg10735847_TC21	0.0865126	0.00146875	0.0010126	0.999957	chr1	89176312		OpenSea	TSS1500;TSS1500	ENSG00000213512.3;ENSG00000213512.3			FALSE
cg16043223_TC21	-0.115573	0.0013148	0.00101287	0.999957	chr6	3990795		OpenSea					FALSE
cg26664252_BC21	-0.0761436	0.00131607	0.0010139	0.999957	chr6	30209444	chr6:30213156-30214410	Shelf					FALSE
cg04346791_TC21	0.131689	0.00147064	0.00101398	0.999957	chr12	32454320		OpenSea			chr12:32454176-32454392	Unclassified_Cell_type_specific	TRUE
cg23854921_BC21	0.0180553	0.00147205	0.00101501	0.999957	chr2	64524191	chr2:64524007-64524863	Island	TSS200;TSS200;TSS200;TSS200;TSS200;TSS200;TSS200;TSS200;TSS1500;TSS1500;TSS1500;TSS1500	ENSG00000260101.2;ENSG00000119844.17;ENSG00000119844.17;ENSG00000119844.17;ENSG00000119844.17;ENSG00000119844.17;ENSG00000119844.17;ENSG00000119844.17;ENSG00000119844.17;ENSG00000119844.17;ENSG00000119844.17;ENSG00000283204.1		Promoter_Associated	TRUE
cg01801666_BC21	0.127339	0.00147237	0.00101524	0.999957	chr1	200475711		OpenSea	exon_2	ENSG00000230623			FALSE
cg07808023_TC21	0.14072	0.0014741	0.0010165	0.999957	chr15	77635019	chr15:77632226-77633646;chr15:77634699-77635020	Island	TSS1500	ENSG00000169783.13			FALSE
cg19904122_TC11	-0.043406	0.00132001	0.00101708	0.999957	chr19	3286061	chr19:3285858-3286123	Island					FALSE
cg16658140_TC21	0.11274	0.00147608	0.00101794	0.999957	chr16	53378441		OpenSea	TSS200	ENSG00000261804.3			FALSE
cg14856657_BC21	-0.115169	0.00132168	0.00101843	0.999957	chr10	29881672		OpenSea					FALSE
cg16624069_BC21	-0.0858677	0.00132181	0.00101854	0.999957	chr13	98977956		OpenSea	exon_1;exon_1;exon_1;exon_1;exon_1;5UTR;5UTR;5UTR;5UTR;5UTR	DOCK9;DOCK9;DOCK9;DOCK9;DOCK9;DOCK9;DOCK9;DOCK9;DOCK9;DOCK9		Unclassified_Cell_type_specific	TRUE
cg13760060_TC21	0.0319142	0.00147787	0.00101925	0.999957	chr14	72745869		OpenSea				Unclassified_Cell_type_specific	TRUE
cg18247126_BC21	0.0201282	0.00147788	0.00101926	0.999957	chr11	121293242	chr11:121292535-121293243	Island				Promoter_Associated	TRUE
cg14553881_BC11	-0.0611558	0.00132356	0.00101995	0.999957	chr17	81387850	chr17:81386583-81387923	Island					FALSE
cg10027085_TC11	-0.0249831	0.00132818	0.00102369	0.999957	chr1	213015380	chr1:213015177-213015482;chr1:213015657-213015919	Island	exon_1	ANGEL2		Promoter_Associated	TRUE
cg09819520_BC21	-0.0985535	0.00132921	0.00102452	0.999957	chr10	79222020		OpenSea					FALSE
cg03336678_TC11	-0.0126895	0.00133004	0.00102519	0.999957	chr3	40505944	chr3:40505900-40506137	Island	TSS200;TSS200;TSS200;TSS200	ENSG00000177842.12;ENSG00000177842.12;ENSG00000177842.12;ENSG00000177842.12		Promoter_Associated	TRUE
cg15577302_TC21	-0.0313769	0.0013307	0.00102572	0.999957	chr5	74684591	chr5:74685142-74685696	Shore	TSS1500;TSS1500;TSS1500	ENSG00000049860.14;ENSG00000049860.14;ENSG00000049860.14			FALSE
cg23977883_TC21	-0.029826	0.00133088	0.00102587	0.999957	chr5	139413698		OpenSea	exon_8;3UTR	DNAJC18;DNAJC18			FALSE
cg21015714_BC21	-0.0862218	0.00133179	0.00102661	0.999957	chr2	172820562		OpenSea	TSS1500	ENSG00000091428.18			FALSE
cg24751551_TC21	-0.0674988	0.00133316	0.00102771	0.999957	chr21	38255918		OpenSea	TSS1500;TSS1500;TSS1500;TSS1500;TSS1500;TSS1500;TSS1500;TSS1500	ENSG00000157551.19;ENSG00000157551.19;ENSG00000157551.19;ENSG00000157551.19;ENSG00000157551.19;ENSG00000157551.19;ENSG00000157551.19;ENSG00000157551.19	chr21:38255620-38256187		FALSE
cg14240733_TC11	-0.00749914	0.0013339	0.00102831	0.999957	chr9	79572940	chr9:79570564-79573645	Island	TSS1500;TSS1500;TSS1500;TSS1500;TSS1500	ENSG00000106829.20;ENSG00000106829.20;ENSG00000106829.20;ENSG00000106829.20;ENSG00000106829.20			FALSE
cg01833398_TC11	-0.00927313	0.00133418	0.00102853	0.999957	chr12	53500976	chr12:53499411-53499826;chr12:53500666-53501529	Island	exon_1;exon_1;exon_1;5UTR;5UTR;TSS1500;TSS1500;TSS1500;TSS1500;TSS1500;TSS1500;TSS1500;TSS1500;TSS1500;TSS1500;TSS1500;TSS1500;TSS1500;TSS1500;TSS1500;TSS1500;TSS1500	ENSG00000270175;TARBP2;TARBP2;TARBP2;TARBP2;ENSG00000139625.13;ENSG00000139625.13;ENSG00000139546.11;ENSG00000139546.11;ENSG00000139546.11;ENSG00000139546.11;ENSG00000139546.11;ENSG00000139546.11;ENSG00000139546.11;ENSG00000139546.11;ENSG00000139546.11;ENSG00000139546.11;ENSG00000139546.11;ENSG00000139546.11;ENSG00000139546.11;ENSG00000139546.11;ENSG00000139546.11		Promoter_Associated	TRUE
cg13595333_BC21	0.0187603	0.00149234	0.00102981	0.999957	chr17	17223384	chr17:17221384-17221617	Shore	TSS1500	ENSG00000154803.13			FALSE
cg05288182_TC21	-0.018621	0.00133739	0.00103113	0.999957	chr3	101862300		OpenSea					FALSE
cg00529661_BC21	-0.0725638	0.00134325	0.00103587	0.999957	chr1	31769909	chr1:31772226-31773060	Shelf					FALSE
cg26098637_BC21	-0.0445249	0.00134428	0.0010367	0.999957	chr6	168051379	chr6:168048390-168048669	Shelf					FALSE
cg23080983_TC21	-0.0451001	0.00134471	0.00103705	0.999957	chr17	81256258		OpenSea					FALSE
cg23463494_TC21	-0.10235	0.00134521	0.00103745	0.999957	chr16	29821448		OpenSea	exon_3;3UTR;TSS1500;TSS1500;TSS200	PAGR1;PAGR1;ENSG00000238045.9;ENSG00000238045.9;ENSG00000238045.9		Promoter_Associated	TRUE
cg10844924_TC21	0.0847093	0.00150291	0.00103753	0.999957	chr7	31310931		OpenSea					FALSE
cg17892328_TC11	-0.00884315	0.00134854	0.00104015	0.999957	chr1	182391659	chr1:182390562-182392428	Island	exon_1;exon_1;5UTR;TSS1500;TSS1500;TSS1500	GLUL;GLUL;GLUL;ENSG00000135821.19;ENSG00000135821.19;ENSG00000135821.19			FALSE
cg06621606_TC21	0.0824134	0.00150657	0.0010402	0.999957	chr5	83703283		OpenSea	TSS200	ENSG00000206744.1			FALSE
cg01587469_TC21	0.0176283	0.00150959	0.0010424	0.999957	chr1	169712177		OpenSea	TSS1500;TSS1500;TSS1500	ENSG00000188404.10;ENSG00000188404.10;ENSG00000188404.10		Unclassified	TRUE
cg06035815_TC21	-0.136976	0.0013523	0.00104319	0.999957	chr6	26189369	chr6:26188769-26189067	Shore	TSS1500	ENSG00000277157.2		Promoter_Associated	TRUE
cg13732677_BC11	0.00847773	0.00151101	0.00104345	0.999957	chr9	98255649	chr9:98255100-98256299	Island	exon_1;5UTR;TSS200;TSS200;TSS200	TBC1D2;TBC1D2;ENSG00000095383.20;ENSG00000095383.20;ENSG00000095383.20		Promoter_Associated	TRUE
cg22035510_TC21	-0.10127	0.00135331	0.00104401	0.999957	chr17	2083762		OpenSea	TSS1500;TSS1500	ENSG00000070366.14;ENSG00000070366.14	chr17:2083595-2084050	Unclassified_Cell_type_specific	TRUE
cg24075296_TC21	0.0909739	0.0015148	0.00104621	0.999957	chr4	152039373		OpenSea					FALSE
cg12537452_TC21	-0.0350026	0.00135625	0.00104639	0.999957	chr2	201158556		OpenSea	TSS1500	ENSG00000226312.7		Unclassified	TRUE
cg19971103_BC21	0.112449	0.00151687	0.00104773	0.999957	chr9	3649054		OpenSea					FALSE
cg14726699_BC21	0.0661629	0.00151854	0.00104895	0.999957	chr6	79413662		OpenSea					FALSE
cg01089800_TC21	-0.031126	0.00136195	0.001051	0.999957	chr19	3759273	chr19:3761495-3761828;chr19:3762657-3763111	Shelf					FALSE
cg22970496_BC11	0.0299839	0.00152184	0.00105136	0.999957	chr7	194081	chr7:191875-193799;chr7:195474-195988	Shore	exon_1;TSS1500	ENSG00000240093;ENSG00000177706.9		Unclassified_Cell_type_specific	TRUE
cg13723676_BC21	-0.0332176	0.00136486	0.00105336	0.999957	chr9	68980018		OpenSea					FALSE
cg02669207_TC11	-0.00789091	0.00136544	0.00105383	0.999957	chr9	128068207	chr9:128067256-128068670	Island	exon_1;5UTR;TSS1500;TSS200;TSS200	SLC25A25;SLC25A25;ENSG00000171169.9;ENSG00000171169.9;ENSG00000148339.13		NonGene_Associated	TRUE
cg01673931_BC11	-0.211317	0.00136581	0.00105412	0.999957	chr3	49119213	chr3:49120335-49121030	Shore	exon_2;exon_2;exon_2;exon_2;exon_2;exon_2;exon_2;exon_2;exon_2;exon_2;exon_2;exon_2;5UTR;5UTR;5UTR;5UTR;5UTR;5UTR;5UTR;5UTR;5UTR;5UTR;5UTR	USP19;USP19;USP19;USP19;USP19;USP19;USP19;USP19;USP19;USP19;USP19;USP19;USP19;USP19;USP19;USP19;USP19;USP19;USP19;USP19;USP19;USP19;USP19			FALSE
cg19340941_TC11	-0.199733	0.00136899	0.0010567	0.999957	chr4	154781779	chr4:154781188-154782176	Island	TSS200	ENSG00000151962.8			FALSE
cg02672220_BC21	-0.0378694	0.0013699	0.00105743	0.999957	chr21	36698288	chr21:36695893-36701591	Island	TSS1500;TSS1500;TSS1500	ENSG00000159263.16;ENSG00000159263.16;ENSG00000159263.16			FALSE
cg22050066_TC21	0.127285	0.00153022	0.00105748	0.999957	chr17	2816129		OpenSea					FALSE
cg04779856_BC21	0.0397816	0.00153242	0.00105909	0.999957	chr3	40306580	chr3:40309366-40310341	Shelf					FALSE
cg07270175_BC21	-0.0413437	0.00137206	0.00105918	0.999957	chr10	94363292	chr10:94362783-94363147	Shore	TSS1500;TSS1500;TSS1500	ENSG00000173145.11;ENSG00000173145.11;ENSG00000173145.11		Promoter_Associated	TRUE
cg26694558_TC21	0.083462	0.00153257	0.0010592	0.999957	chr10	59959966		OpenSea	exon_2;exon_2;TSS1500	LINC01553;LINC01553;ENSG00000235931.2			FALSE
cg02104967_BC11	-0.00849769	0.00137567	0.00106211	0.999957	chr17	1483074	chr17:1485392-1488436	Shelf					FALSE
cg20979153_TC11	0.100072	0.00153721	0.00106259	0.999957	chr20	53583209	chr20:53581519-53581861	Shore	TSS200	ENSG00000171940.14		Promoter_Associated_Cell_type_specific	TRUE
cg17291986_BC21	0.072677	0.00153907	0.00106395	0.999957	chr12	11981200		OpenSea				Unclassified_Cell_type_specific	TRUE
cg08965888_TC21	0.159015	0.00153911	0.00106399	0.999957	chr11	44319896	chr11:44316147-44317233;chr11:44319715-44320207	Island					FALSE
cg26994894_TC21	0.0778009	0.00154167	0.00106586	0.999957	chr16	87069085		OpenSea					FALSE
cg05464764_BC21	-0.131875	0.00138031	0.00106587	0.999957	chr22	23899108	chr22:23894070-23895352	Shelf	TSS200	ENSG00000218537.1			FALSE
cg01116554_BC21	0.0177166	0.00154762	0.00107021	0.999957	chr1	99385911		OpenSea					FALSE
cg17470637_TC11	-0.0125526	0.00138892	0.00107283	0.999957	chr19	8413133	chr19:8413028-8413612	Island	TSS200;TSS200;TSS200;TSS200;TSS200;TSS1500	ENSG00000099785.11;ENSG00000099785.11;ENSG00000099785.11;ENSG00000099785.11;ENSG00000099785.11;ENSG00000099785.11		Promoter_Associated	TRUE
cg03634729_BC21	-0.134196	0.00139358	0.00107661	0.999957	chr18	23872865		OpenSea	TSS200;TSS200	ENSG00000053747.17;ENSG00000053747.17			FALSE
cg15107203_TC21	0.101394	0.00155823	0.00107797	0.999957	chr1	150556694	chr1:150557179-150557428	Shore	exon_11;exon_10;exon_10;exon_10;exon_10;exon_8	ADAMTSL4;ADAMTSL4;ADAMTSL4;ADAMTSL4;ADAMTSL4;ADAMTSL4			FALSE
cg26476565_BC21	-0.0939632	0.00139628	0.0010788	0.999957	chr22	46454853		OpenSea					FALSE
cg01900759_BC21	0.154828	0.0015602	0.00107941	0.999957	chr9	74886777	chr9:74887177-74887602	Shore					FALSE
cg10002888_BC21	-0.127909	0.00139733	0.00107965	0.999957	chr6	31625197	chr6:31620002-31621247	Shelf	exon_6;exon_6;exon_4;exon_1;exon_4;TSS1500	PRRC2A;PRRC2A;PRRC2A;PRRC2A;ENSG00000289282;ENSG00000204469.13			FALSE
cg24228386_TC21	-0.0329032	0.00139827	0.00108041	0.999957	chr12	75963227		OpenSea	TSS1500	ENSG00000257329.1			FALSE
cg15698737_BC21	-0.153046	0.00139844	0.00108055	0.999957	chr15	73715575		OpenSea					FALSE
cg24681695_TC11	0.00555636	0.00156242	0.00108104	0.999957	chr2	169694436	chr2:169694273-169694861	Island	TSS200;TSS200;TSS200;TSS200;TSS200;TSS200;TSS200;TSS200;TSS200;TSS1500;TSS200;TSS200	ENSG00000154479.13;ENSG00000154479.13;ENSG00000144362.12;ENSG00000144362.12;ENSG00000144362.12;ENSG00000144362.12;ENSG00000144362.12;ENSG00000144362.12;ENSG00000144362.12;ENSG00000144362.12;ENSG00000213160.10;ENSG00000213160.10		Promoter_Associated	TRUE
cg16504531_BC21	0.178789	0.00156289	0.00108138	0.999957	chr9	34124348	chr9:34126268-34126961	Shore					FALSE
cg27118937_TC11	0.0125849	0.00156846	0.00108546	0.999957	chr16	933870	chr16:929785-930198	Shelf	exon_2;exon_3	LMF1-AS1;LMF1-AS1			FALSE
cg26617011_BC21	0.0941895	0.00157093	0.00108727	0.999957	chr7	17144583		OpenSea	exon_5	ENSG00000237773	chr7:17144408-17144640		FALSE
cg02816091_BC21	-0.0859656	0.00140759	0.00108796	0.999957	chr19	10764350		OpenSea					FALSE
cg25356393_BC11	0.0699108	0.00157208	0.00108811	0.999957	chr20	63420803	chr20:63420588-63420933;chr20:63421554-63421973	Island	TSS1500	ENSG00000280936.1		Unclassified_Cell_type_specific	TRUE
cg23055289_TC21	-0.0277388	0.00140857	0.00108876	0.999957	chr17	80254201		OpenSea					FALSE
cg09819654_TC11	-0.00735344	0.00140982	0.00108977	0.999957	chr1	8878642	chr1:8878254-8879287	Island	exon_1;exon_1;exon_1;exon_1;exon_1;exon_1;exon_1;exon_1;exon_1;5UTR;5UTR;5UTR;5UTR;5UTR;5UTR;TSS1500;TSS1500;TSS1500;TSS1500;TSS200	ENO1;ENO1;ENO1;ENO1;ENO1;ENO1;ENO1;ENO1;ENO1;ENO1;ENO1;ENO1;ENO1;ENO1;ENO1;ENSG00000074800.16;ENSG00000074800.16;ENSG00000074800.16;ENSG00000074800.16;ENSG00000230679.1		NonGene_Associated	TRUE
cg22621137_BC21	-0.0208192	0.00141354	0.00109279	0.999957	chr9	5264123		OpenSea					FALSE
cg00155397_TC21	-0.0323437	0.00141403	0.00109319	0.999957	chr1	240611860		OpenSea					FALSE
cg22490454_BC21	0.0586388	0.00157992	0.00109385	0.999957	chr2	468934	chr2:467849-468659	Shore					FALSE
cg20935664_BC21	-0.0529975	0.00141517	0.00109411	0.999957	chr9	136867360	chr9:136866200-136866754	Shore	TSS1500;TSS1500;TSS1500	ENSG00000107223.13;ENSG00000107223.13;ENSG00000107223.13			FALSE
cg19344103_TC21	-0.0373563	0.00141563	0.00109448	0.999957	chr6	108261867	chr6:108260512-108261465	Shore	TSS1500;TSS1500;TSS1500;TSS1500	ENSG00000112335.15;ENSG00000112335.15;ENSG00000112335.15;ENSG00000112335.15		NonGene_Associated	TRUE
cg04462925_BC21	0.116676	0.00158225	0.00109556	0.999957	chr8	126857312		OpenSea					FALSE
cg09208041_BC21	0.0720347	0.00158306	0.00109615	0.999957	chr16	11492126	chr16:11493763-11494096	Shore	TSS1500	ENSG00000188897.10			FALSE
cg26352006_TC21	0.151879	0.00158493	0.00109752	0.999957	chr5	34749835		OpenSea					FALSE
cg02281970_BC11	-0.0924708	0.00142073	0.00109862	0.999957	chr19	1271308	chr19:1265855-1269944;chr19:1274470-1276359	Shore	exon_3;exon_3;exon_3;exon_2;exon_3;exon_3;TSS1500;TSS1500	CIRBP;CIRBP;CIRBP;CIRBP;CIRBP;CIRBP;ENSG00000099622.14;ENSG00000267493.4			FALSE
cg04518155_TC21	0.0148128	0.00158731	0.00109926	0.999957	chr4	169758143	chr4:169757793-169758104	Shore	TSS200;TSS1500	ENSG00000056050.7;ENSG00000056050.7		Promoter_Associated	TRUE
cg23898951_TC21	-0.0302518	0.00142154	0.00109928	0.999957	chr10	4469711		OpenSea					FALSE
cg08878360_BC21	-0.014705	0.00142174	0.00109943	0.999957	chr19	19193170	chr19:19192045-19192339;chr19:19192541-19192813	Shore	TSS1500;TSS1500;TSS1500;TSS1500;TSS1500;TSS1500;TSS1500;TSS1500;TSS1500;TSS1500;TSS1500;TSS1500;TSS1500;TSS1500	ENSG00000213999.17;ENSG00000064489.23;ENSG00000064489.23;ENSG00000064489.23;ENSG00000064489.23;ENSG00000064489.23;ENSG00000064489.23;ENSG00000254901.8;ENSG00000254901.8;ENSG00000254901.8;ENSG00000254901.8;ENSG00000254901.8;ENSG00000254901.8;ENSG00000064490.14		Promoter_Associated	TRUE
cg04881720_TC11	-0.0809037	0.00142182	0.0010995	0.999957	chr20	64048894	chr20:64048071-64049979	Island	exon_2;TSS1500	SOX18;ENSG00000171703.17		Unclassified_Cell_type_specific	TRUE
cg23008048_TC21	-0.123708	0.00142319	0.00110061	0.999957	chr11	134333953	chr11:134331890-134332513	Shore				Unclassified_Cell_type_specific	TRUE
cg16627915_TC21	-0.048727	0.00142687	0.00110359	0.999957	chr8	143813177	chr8:143809567-143809856;chr8:143810750-143811298;chr8:143812748-143812999;chr8:143815113-143816446	Shore	TSS200	ENSG00000284224.1			FALSE
cg15429732_BC11	0.0194156	0.00159363	0.00110389	0.999957	chr11	65084485	chr11:65083830-65084356	Shore	exon_1;TSS1500;TSS1500;TSS1500;TSS1500;TSS1500;TSS1500;TSS1500;TSS1500;TSS200;TSS1500;TSS1500	ZFPL1;ENSG00000146670.10;ENSG00000146670.10;ENSG00000146670.10;ENSG00000146670.10;ENSG00000146670.10;ENSG00000146670.10;ENSG00000146670.10;ENSG00000146670.10;ENSG00000162300.13;ENSG00000162300.13;ENSG00000162300.13		Promoter_Associated	TRUE
cg05886574_BC21	-0.0900109	0.00142857	0.00110497	0.999957	chr10	27241162	chr10:27240289-27241173;chr10:27242009-27242434	Island	TSS1500;TSS1500;TSS1500;TSS1500;TSS1500;TSS1500;TSS1500;TSS1500;TSS1500;TSS1500;TSS1500;TSS1500;TSS1500;TSS1500;TSS1500;TSS1500;TSS1500;TSS1500;TSS1500	ENSG00000107897.20;ENSG00000107897.20;ENSG00000107897.20;ENSG00000107897.20;ENSG00000107897.20;ENSG00000107897.20;ENSG00000107897.20;ENSG00000107897.20;ENSG00000107897.20;ENSG00000107897.20;ENSG00000107897.20;ENSG00000107897.20;ENSG00000107897.20;ENSG00000107897.20;ENSG00000107897.20;ENSG00000107897.20;ENSG00000107897.20;ENSG00000107897.20;ENSG00000107897.20		Promoter_Associated	TRUE
cg17746527_BC21	-0.031755	0.00143018	0.00110628	0.999957	chr20	50217725		OpenSea					FALSE
cg20013586_BC21	0.124547	0.00159886	0.00110772	0.999957	chr2	100921769		OpenSea					FALSE
cg12465704_TC21	-0.0682589	0.00143216	0.00110789	0.999957	chr1	109466248	chr1:109466340-109467165	Shore	TSS1500	ENSG00000143028.9			FALSE
cg27552955_BC11	0.00942098	0.00159929	0.00110804	0.999957	chr3	142724073	chr3:142724003-142725136	Island	exon_1;exon_1;5UTR;5UTR;TSS200;TSS200;TSS200;TSS1500	TRPC1;TRPC1;TRPC1;TRPC1;ENSG00000287045.2;ENSG00000287045.2;ENSG00000144935.17;ENSG00000144935.17		Promoter_Associated	TRUE
cg18210910_BC21	-0.0636263	0.0014336	0.00110905	0.999957	chr2	71144028		OpenSea	TSS1500	ENSG00000124383.11			FALSE
cg25950625_TC11	-0.0815626	0.00143377	0.0011092	0.999957	chr5	41510014	chr5:41509681-41510064;chr5:41510222-41510549	Island					FALSE
cg13581859_TC21	0.175354	0.00160129	0.00110951	0.999957	chr6	33080929	chr6:33080639-33081037	Island	exon_2;exon_2;exon_2;exon_2;exon_1;exon_2;exon_1;TSS1500;TSS200;TSS200;TSS200;TSS200	HLA-DPB1;HLA-DPB1;HLA-DPB1;HLA-DPB1;HLA-DPB1;HLA-DPB1;HLA-DPB1;ENSG00000231389.8;ENSG00000231389.8;ENSG00000231389.8;ENSG00000231389.8;ENSG00000223865.11			FALSE
cg17882976_BC21	-0.0497843	0.00143604	0.00111104	0.999957	chr8	30503879		OpenSea					FALSE
cg19931733_TC21	-0.0768925	0.00143776	0.00111243	0.999957	chr2	30159708		OpenSea	exon_5;exon_4;exon_3;exon_4;3UTR;3UTR;3UTR;3UTR	YPEL5;YPEL5;YPEL5;YPEL5;YPEL5;YPEL5;YPEL5;YPEL5		Gene_Associated_Cell_type_specific	TRUE
cg21532590_BC21	0.0842803	0.0016054	0.00111252	0.999957	chr3	126184793		OpenSea					FALSE
cg03545083_BC11	0.00744192	0.00160878	0.00111499	0.999957	chr7	99616873	chr7:99616601-99617262	Island	TSS200;TSS200;TSS200;TSS200;TSS200;TSS200	ENSG00000197037.11;ENSG00000197037.11;ENSG00000197037.11;ENSG00000197037.11;ENSG00000197037.11;ENSG00000197037.11		Promoter_Associated	TRUE
cg26407309_TC21	-0.0682584	0.00144267	0.00111642	0.999957	chr7	139779320	chr7:139777110-139778697	Shore	TSS1500	ENSG00000064393.16		Unclassified_Cell_type_specific	TRUE
cg09754663_BC21	-0.0264174	0.00144769	0.00112049	0.999957	chr8	29060929		OpenSea				Promoter_Associated	TRUE
cg10652781_TC21	-0.0296114	0.00144802	0.00112075	0.999957	chr12	47795780		OpenSea	exon_1;TSS200	HDAC7;ENSG00000061273.18			FALSE
cg05214404_TC21	0.0173096	0.00161667	0.00112078	0.999957	chr4	37453740	chr4:37453657-37453956	Island	TSS1500;TSS200	ENSG00000154274.15;ENSG00000154274.15		Promoter_Associated	TRUE
cg11252036_TC21	0.0730196	0.00161905	0.00112252	0.999957	chr5	163257763		OpenSea	TSS1500;TSS1500	ENSG00000254186.3;ENSG00000254186.3			FALSE
cg12686763_BC21	-0.117883	0.00145264	0.00112451	0.999957	chr11	63856061		OpenSea					FALSE
cg01250864_BC21	-0.0403312	0.00145278	0.00112462	0.999957	chr6	137220250	chr6:137218989-137219541	Shore	TSS1500;TSS1500;TSS1500;TSS1500;TSS1500;TSS1500;TSS1500;TSS1500;TSS1500;TSS1500;TSS1500;TSS1500;TSS1500;TSS1500;TSS1500;TSS1500;TSS1500	ENSG00000027697.16;ENSG00000027697.16;ENSG00000027697.16;ENSG00000027697.16;ENSG00000027697.16;ENSG00000027697.16;ENSG00000027697.16;ENSG00000027697.16;ENSG00000027697.16;ENSG00000027697.16;ENSG00000027697.16;ENSG00000027697.16;ENSG00000027697.16;ENSG00000027697.16;ENSG00000027697.16;ENSG00000027697.16;ENSG00000027697.16			FALSE
cg14206865_TC11	-0.0244291	0.00145519	0.00112658	0.999957	chr9	122228933	chr9:122225464-122228807	Shore	exon_1;exon_1;5UTR;5UTR;TSS1500;TSS1500;TSS1500;TSS1500	LHX6;LHX6;LHX6;LHX6;ENSG00000106852.16;ENSG00000106852.16;ENSG00000106852.16;ENSG00000106852.16			FALSE
cg02767453_BC21	-0.115997	0.00145538	0.00112673	0.999957	chr20	7068624		OpenSea	TSS1500	ENSG00000232271.1			FALSE
cg16715722_BC21	0.186082	0.00162858	0.00112952	0.999957	chr10	101130539	chr10:101131253-101132274;chr10:101133903-101135302	Shore	TSS1500;TSS1500;TSS1500	ENSG00000107807.13;ENSG00000107807.13;ENSG00000107807.13			FALSE
cg07383652_BC21	0.0998099	0.00162879	0.00112967	0.999957	chr4	119285308		OpenSea					FALSE
cg00175180_BC21	0.138669	0.0016312	0.00113144	0.999957	chr20	46222944		OpenSea					FALSE
cg07195246_BC21	-0.10872	0.00146257	0.00113257	0.999957	chr11	45982713		OpenSea					FALSE
cg25949304_BC21	0.158127	0.00163295	0.00113272	0.999957	chr5	141435651	chr5:141430927-141433050	Shelf					FALSE
cg11356911_BC21	-0.143064	0.00146454	0.00113417	0.999957	chr14	63726004	chr14:63727523-63728331	Shore					FALSE
cg13094652_BC21	-0.0656489	0.00146792	0.00113691	0.999957	chr1	223846911	chr1:223845383-223846561	Shore	TSS1500;TSS1500;TSS1500;TSS1500	ENSG00000143514.18;ENSG00000143514.18;ENSG00000143514.18;ENSG00000143514.18			FALSE
cg15885575_BC21	0.127897	0.00163904	0.00113719	0.999957	chr6	100100065		OpenSea					FALSE
cg21926039_BC11	-0.0085509	0.00146987	0.00113849	0.999957	chr7	134646661		OpenSea	TSS200;TSS200;TSS200	ENSG00000172331.12;ENSG00000172331.12;ENSG00000172331.12		Unclassified	TRUE
cg24910286_BC21	-0.0481062	0.00147082	0.00113927	0.999957	chr20	3804494		OpenSea					FALSE
cg26867132_TC21	0.0271512	0.00164357	0.00114052	0.999957	chr1	202627400		OpenSea					FALSE
cg08899632_BC21	-0.0174626	0.00147454	0.0011423	0.999957	chr20	52192461	chr20:52191259-52192286	Shore	TSS1500;TSS1500;TSS1500;TSS1500;TSS1500	ENSG00000020256.20;ENSG00000020256.20;ENSG00000020256.20;ENSG00000020256.20;ENSG00000020256.20			FALSE
cg01292999_BC21	-0.0493347	0.00147506	0.00114271	0.999957	chr3	69792026		OpenSea					FALSE
cg05142322_BC21	0.130685	0.00164669	0.00114281	0.999957	chr3	77692100		OpenSea					FALSE
cg14713504_TC21	0.0525556	0.00164802	0.00114378	0.999957	chr17	65576942		OpenSea					FALSE
cg12465251_BC21	0.0447625	0.00164971	0.00114502	0.999957	chr8	29320485		OpenSea	TSS1500;TSS1500;TSS1500	ENSG00000288735.2;ENSG00000288735.2;ENSG00000288735.2		Unclassified	TRUE
cg06261415_BC21	0.0928318	0.00165034	0.00114549	0.999957	chr4	10315803		OpenSea					FALSE
cg16256875_BC21	-0.0435726	0.00147993	0.00114667	0.999957	chr17	81299153	chr17:81294567-81295667	Shelf					FALSE
cg02908509_BC21	0.0769651	0.00165205	0.00114674	0.999957	chr2	142756520		OpenSea					FALSE
cg12818067_TC11	-0.00574649	0.00148474	0.00115058	0.999957	chr11	33016078	chr11:33015660-33016371	Island	TSS200	ENSG00000121690.11		Promoter_Associated	TRUE
cg08509599_BC21	0.194228	0.0016576	0.00115082	0.999957	chr1	29249153		OpenSea					FALSE
cg01206923_TC11	0.0159465	0.00165995	0.00115255	0.999957	chr5	171387546	chr5:171387443-171388651	Island	TSS1500;TSS200;TSS200;TSS1500;TSS1500;TSS1500;TSS1500;TSS1500;TSS1500;TSS1500;TSS1500;TSS1500;TSS1500;TSS1500;TSS1500;TSS1500;TSS1500;TSS1500;TSS1500;TSS1500;TSS1500;TSS1500;TSS1500;TSS1500;TSS1500;TSS1500;TSS1500;TSS1500;TSS1500	ENSG00000264249.1;ENSG00000181163.14;ENSG00000181163.14;ENSG00000181163.14;ENSG00000181163.14;ENSG00000181163.14;ENSG00000181163.14;ENSG00000181163.14;ENSG00000181163.14;ENSG00000181163.14;ENSG00000181163.14;ENSG00000181163.14;ENSG00000181163.14;ENSG00000181163.14;ENSG00000181163.14;ENSG00000181163.14;ENSG00000181163.14;ENSG00000181163.14;ENSG00000181163.14;ENSG00000181163.14;ENSG00000181163.14;E…		Unclassified	TRUE
cg00006828_BC21	0.0649842	0.00166194	0.00115401	0.999957	chr3	146606286		OpenSea	TSS1500;TSS1500;TSS1500	ENSG00000231213.7;ENSG00000231213.7;ENSG00000231213.7			FALSE
cg16278877_BC12	0.0691404	0.00166249	0.00115441	0.999957	chr11	64831612	chr11:64827049-64827794;chr11:64829503-64830047	Shore	exon_28;exon_2	CDC42BPG;CDC42BPG			FALSE
cg10529000_BC21	-0.0221485	0.00149108	0.00115573	0.999957	chr9	114506014	chr9:114504188-114505814	Shore	TSS1500;TSS1500;TSS1500;TSS1500;TSS1500	ENSG00000095397.17;ENSG00000095397.17;ENSG00000095397.17;ENSG00000095397.17;ENSG00000095397.17			FALSE
cg05472816_BC21	0.0668738	0.00166442	0.00115583	0.999957	chr3	9067748		OpenSea				Unclassified	TRUE
cg00852548_BC21	0.0546444	0.00166517	0.00115638	0.999957	chr10	97138578		OpenSea					FALSE
cg15455539_BC21	-0.0353037	0.00149261	0.00115697	0.999957	chr19	34353183		OpenSea	exon_14;exon_3;3UTR	GARRE1;GARRE1;GARRE1			FALSE
cg07298397_BC21	0.129644	0.00166691	0.00115765	0.999957	chr2	60353749		OpenSea	TSS1500	ENSG00000228590.4			FALSE
cg01093395_TC21	-0.0313253	0.00150327	0.00116564	0.999957	chr16	3119585	chr16:3119352-3120289	Island	exon_7;exon_7;exon_7;exon_4	ZNF205;ZNF205;ZNF205;ZNF205			FALSE
cg14264219_BC21	0.1117	0.00168045	0.00116761	0.999957	chr11	61055712		OpenSea	exon_1;exon_2;TSS200	LINC02954;LINC02954;ENSG00000256733.2			FALSE
cg05489356_BC21	0.159589	0.00168179	0.00116859	0.999957	chr3	128369933		OpenSea					FALSE
cg04221293_TC21	0.147994	0.00168345	0.00116981	0.999957	chr2	226192696		OpenSea					FALSE
cg20729245_TC21	0.0920531	0.00168684	0.0011723	0.999957	chr3	37229861		OpenSea					FALSE
cg02583271_TC11	-0.0100279	0.0015167	0.00117656	0.999957	chr16	3500926	chr16:3500108-3500346;chr16:3500773-3501274	Island	TSS200;TSS200;TSS200;TSS200;TSS200;TSS200;TSS200;TSS1500	ENSG00000103351.13;ENSG00000103351.13;ENSG00000103351.13;ENSG00000103351.13;ENSG00000103351.13;ENSG00000103351.13;ENSG00000103351.13;ENSG00000103351.13		Promoter_Associated	TRUE
cg08471816_TC21	0.0623489	0.00169361	0.00117728	0.999957	chr7	82501359		OpenSea					FALSE
cg12465949_BC21	0.0413828	0.00169841	0.00118081	0.999957	chr18	67266150		OpenSea					FALSE
cg18553358_BC21	0.100686	0.00169943	0.00118156	0.999957	chr5	5307195	chr5:5303150-5303376	Shelf					FALSE
cg06127719_BC21	-0.0497681	0.00152315	0.00118181	0.999957	chr18	11150785	chr18:11148308-11149937	Shore	TSS1500	ENSG00000154864.14			FALSE
cg04179431_BC21	-0.12366	0.00152742	0.00118529	0.999957	chr1	6359048		OpenSea	exon_1;5UTR	ACOT7;ACOT7		Promoter_Associated	TRUE
cg01562516_TC21	0.0322086	0.00170631	0.00118662	0.999957	chr15	85619996		OpenSea	exon_1;exon_1;exon_2;5UTR;5UTR	AKAP13;AKAP13;AKAP13-AS1;AKAP13;AKAP13			FALSE
cg20301751_TC21	-0.191027	0.00153071	0.00118796	0.999957	chr15	41850294		OpenSea	exon_1	SPTBN5			FALSE
cg23594249_BC21	0.096522	0.00171501	0.00119302	0.999957	chr2	229879998		OpenSea	exon_2;exon_2;exon_2;exon_3;exon_2;exon_2;exon_2;exon_2;exon_2;exon_2;exon_2;exon_3	TRIP12;TRIP12;TRIP12;TRIP12;TRIP12;TRIP12;TRIP12;TRIP12;TRIP12;TRIP12;TRIP12;TRIP12			FALSE
cg14252661_BC21	0.156348	0.00171636	0.00119402	0.999957	chr1	162822823	chr1:162822386-162822784	Shore				Unclassified_Cell_type_specific	TRUE
cg06580045_TC21	0.107192	0.00172042	0.001197	0.999957	chr3	39752241		OpenSea					FALSE
cg24616461_TC21	-0.0279011	0.00154821	0.00120221	0.999957	chr17	59155754	chr17:59154494-59155294	Shore	exon_1;exon_1;exon_1;exon_1;exon_1;exon_1;5UTR;5UTR;5UTR;5UTR;5UTR;TSS1500;TSS1500;TSS1500;TSS1500;TSS1500;TSS1500;TSS1500;TSS1500;TSS1500;TSS200;TSS200	PRR11;PRR11;PRR11;PRR11;PRR11;PRR11;PRR11;PRR11;PRR11;PRR11;PRR11;ENSG00000182628.13;ENSG00000182628.13;ENSG00000182628.13;ENSG00000182628.13;ENSG00000182628.13;ENSG00000182628.13;ENSG00000182628.13;ENSG00000182628.13;ENSG00000182628.13;ENSG00000068489.13;ENSG00000068489.13		Promoter_Associated	TRUE
cg16661000_BC21	0.123234	0.00172754	0.00120225	0.999957	chr15	88894479	chr15:88894945-88895619	Shore				Promoter_Associated	TRUE
cg26349142_BC21	-0.0642973	0.00155144	0.00120484	0.999957	chr22	39490512	chr22:39487510-39489005	Shore	exon_2;3UTR	MGAT3;MGAT3		Unclassified	TRUE
cg12600072_BC21	-0.0428932	0.00155212	0.00120539	0.999957	chr13	110232908		OpenSea					FALSE
cg02394835_BC21	0.135077	0.001732	0.00120553	0.999957	chr2	8545282		OpenSea	TSS200	ENSG00000236008.5		Unclassified	TRUE
cg00788494_TC21	-0.0399351	0.00155234	0.00120557	0.999957	chr1	54064323		OpenSea					FALSE
cg25399579_TC21	-0.10615	0.00155295	0.00120607	0.999957	chr20	51742539		OpenSea					FALSE
cg03407966_BC21	0.12316	0.00173378	0.00120684	0.999957	chr4	140688754		OpenSea					FALSE
cg00297521_BC21	-0.0999994	0.00155499	0.00120773	0.999957	chr15	69278538		OpenSea	exon_2;TSS200	PAQR5-DT;ENSG00000259504.2			FALSE
cg01611563_BC21	0.120501	0.00173879	0.00121053	0.999957	chr1	37740933		OpenSea					FALSE
cg00931577_TC21	0.0175156	0.00173926	0.00121087	0.999957	chr5	132963969	chr5:132963267-132964048	Island	exon_1;TSS1500;TSS1500;TSS1500;TSS1500	AFF4-DT;ENSG00000072364.13;ENSG00000072364.13;ENSG00000072364.13;ENSG00000072364.13		Promoter_Associated	TRUE
cg09991422_BC21	-0.0524936	0.00156178	0.00121326	0.999957	chr20	33724477		OpenSea					FALSE
cg17021933_TC21	-0.101551	0.00156712	0.00121761	0.999957	chr12	8911238	chr12:8914350-8914884	Shelf					FALSE
cg27181254_TC21	0.020093	0.00174899	0.00121804	0.999957	chr19	10317487	chr19:10315705-10316047	Shore	exon_5;exon_13;exon_10;exon_13;exon_10;TSS1500;TSS1500;TSS1500;TSS1500;TSS1500;TSS1500;TSS1500	ENSG00000267303;RAVER1;RAVER1;RAVER1;RAVER1;ENSG00000167807.15;ENSG00000267673.6;ENSG00000267673.6;ENSG00000267673.6;ENSG00000267673.6;ENSG00000267673.6;ENSG00000267673.6			FALSE
cg20921751_TC21	0.0304302	0.00175054	0.00121918	0.999957	chr2	48377636		OpenSea	exon_7;3UTR	FOXN2;FOXN2			FALSE
cg01008310_TC21	-0.12922	0.00156954	0.00121958	0.999957	chr4	1008095	chr4:1009318-1012494	Shore					FALSE
cg13309702_TC21	-0.0380751	0.00157167	0.00122132	0.999957	chr8	143794407	chr8:143790631-143790870	Shelf	TSS1500;TSS200	ENSG00000180900.20;ENSG00000180900.20		Unclassified_Cell_type_specific	TRUE
cg20047447_BC11	0.00895668	0.00175445	0.00122207	0.999957	chr15	43792128	chr15:43791946-43793074	Island	exon_3;exon_1;exon_1;5UTR;5UTR;5UTR;TSS200;TSS1500;TSS1500;TSS1500;TSS1500;TSS1500;TSS1500;TSS1500;TSS1500;TSS1500;TSS1500;TSS1500;TSS1500;TSS1500	SERF2;SERF2;SERF2;SERF2;SERF2;SERF2;ENSG00000140264.21;ENSG00000140264.21;ENSG00000140264.21;ENSG00000140264.21;ENSG00000140264.21;ENSG00000140264.21;ENSG00000140264.21;ENSG00000140264.21;ENSG00000140264.21;ENSG00000140264.21;ENSG00000140264.21;ENSG00000140264.21;ENSG00000140264.21;ENSG00000140264.21		Promoter_Associated	TRUE
cg26393923_BC21	0.0240523	0.00175493	0.00122241	0.999957	chr22	42214864		OpenSea	exon_2;exon_2;exon_2;exon_1;exon_2;exon_2	TCF20;TCF20;TCF20;TCF20;TCF20;TCF20			FALSE
cg16327482_TC21	-0.129498	0.00157345	0.00122277	0.999957	chr19	10115663	chr19:10113766-10114462;chr19:10115488-10116026;chr19:10119486-10120006	Island					FALSE
cg13202591_TC21	-0.14256	0.00157383	0.00122308	0.999957	chr1	38816215	chr1:38817937-38818904	Shore	TSS1500	ENSG00000284632.1		Unclassified_Cell_type_specific	TRUE
cg27138951_BC11	-0.0548928	0.00157582	0.0012247	0.999957	chr20	26208307	chr20:26208002-26209712	Island	exon_1;exon_1;exon_1;TSS1500;TSS200;TSS1500;TSS1500;TSS200;TSS200;TSS200;TSS1500;TSS200;TSS200;TSS200;TSS1500;TSS200;TSS1500;TSS200;TSS1500;TSS1500;TSS200;TSS200;TSS1500;TSS200	MIR663AHG;MIR663AHG;MIR663AHG;ENSG00000227195.11;ENSG00000227195.11;ENSG00000227195.11;ENSG00000227195.11;ENSG00000227195.11;ENSG00000227195.11;ENSG00000227195.11;ENSG00000227195.11;ENSG00000227195.11;ENSG00000227195.11;ENSG00000227195.11;ENSG00000227195.11;ENSG00000227195.11;ENSG00000227195.11;ENSG00000227195.11;ENSG00000227195.11;ENSG00000227195.11;ENSG00000227195.11;ENSG00000227195.11;ENSG0000…		Unclassified	TRUE
cg01718741_TC21	-0.0626152	0.00157599	0.00122484	0.999957	chr5	143801744		OpenSea					FALSE
cg22717740_TC21	-0.0403034	0.00157625	0.00122505	0.999957	chr17	39112154		OpenSea	exon_5;exon_1;exon_1	RDM1P5;RDM1P5;PLXDC1			FALSE
cg23956270_BC21	-0.0224048	0.00157659	0.00122533	0.999957	chr19	3807789	chr19:3805861-3806174;chr19:3810780-3811197	Shore					FALSE
cg21206816_TC21	0.0697586	0.00176063	0.00122662	0.999957	chr3	112294232		OpenSea	TSS200;TSS200;TSS200;TSS200	ENSG00000172139.15;ENSG00000172139.15;ENSG00000172139.15;ENSG00000172139.15		Unclassified	TRUE
cg18052272_BC21	-0.0480189	0.00157875	0.00122709	0.999957	chr12	108535691		OpenSea	TSS200	ENSG00000075856.12			FALSE
cg01422881_BC21	0.0870231	0.00176168	0.0012274	0.999957	chr1	44408020	chr1:44405469-44408375	Island	TSS1500	ENSG00000187147.18		Unclassified_Cell_type_specific	TRUE
cg24637625_TC21	0.155186	0.00176233	0.00122787	0.999957	chr12	127964894		OpenSea					FALSE
cg23113769_BC21	-0.0750136	0.0015798	0.00122794	0.999957	chr17	82299616		OpenSea				Promoter_Associated	TRUE
cg08285485_TC21	-0.0535627	0.00158027	0.00122833	0.999957	chr5	95789827		OpenSea					FALSE
cg17735028_TC11	0.00576936	0.00176349	0.00122872	0.999957	chr1	18956608	chr1:18955454-18957389	Island	5UTR;exon_1;TSS1500	IFFO2;IFFO2;ENSG00000169991.11		Promoter_Associated	TRUE
cg05845018_BC21	0.0431006	0.00176626	0.00123077	0.999957	chr1	50653738		OpenSea					FALSE
cg22875624_BC21	0.0471498	0.00176767	0.00123181	0.999957	chr4	145650873		OpenSea	TSS200;TSS1500	ENSG00000151611.17;ENSG00000248356.1			FALSE
cg05790384_BC21	-0.111936	0.00158885	0.00123532	0.999957	chr3	169083216		OpenSea					FALSE
cg18202463_BC21	0.136751	0.0017736	0.00123618	0.999957	chr17	74573326		OpenSea					FALSE
cg16904378_BC21	0.0400094	0.00177395	0.00123644	0.999957	chr2	75460113		OpenSea					FALSE
cg08333636_TC21	0.0700305	0.00177456	0.00123688	0.999957	chr5	103600227		OpenSea					FALSE
cg19299502_BC21	-0.0231821	0.00159091	0.001237	0.999957	chr14	24417418		OpenSea	exon_9	NYNRIN			FALSE
cg16709443_BC11	0.0344055	0.0017768	0.00123854	0.999957	chr2	106542902		OpenSea	TSS200	ENSG00000232001.2		Unclassified	TRUE
cg12096325_BC21	-0.122431	0.00159406	0.00123957	0.999957	chr1	203027413	chr1:203026344-203027057	Shore				Promoter_Associated	TRUE
cg06981504_BC21	-0.0553841	0.00159754	0.00124241	0.999957	chr1	1299464	chr1:1296481-1298279	Shore	exon_1;exon_9;TSS1500;TSS1500;TSS1500	ACAP3;ACAP3;ENSG00000131584.19;ENSG00000131584.19;ENSG00000131584.19		Unclassified	TRUE
cg15709784_TC11	-0.00986511	0.00159818	0.00124293	0.999957	chr12	64452146	chr12:64451819-64452534	Island	exon_1;exon_1;exon_1;exon_1;exon_1;exon_1;exon_1;exon_1;exon_1;exon_1;exon_1;exon_1;exon_1;exon_1;exon_1;exon_1;exon_1;exon_1;exon_1;exon_1;exon_1;exon_1;exon_1;exon_1;exon_1;exon_1;exon_1;5UTR;5UTR;5UTR;5UTR;5UTR;5UTR;5UTR;5UTR;5UTR;5UTR;5UTR;5UTR;5UTR;5UTR;5UTR;5UTR;5UTR;5UTR;5UTR;TSS200;TSS200;TSS200;TSS1500;TSS1500;TSS1500	ENSG00000277895;TBK1;TBK1;TBK1;TBK1;TBK1;TBK1;TBK1;TBK1;TBK1;TBK1;TBK1;TBK1;TBK1;TBK1;TBK1;TBK1;TBK1;TBK1;TBK1;TBK1;TBK1;TBK1;TBK1;TBK1;TBK1;TBK1;TBK1;TBK1;TBK1;TBK1;TBK1;TBK1;TBK1;TBK1;TBK1;TBK1;TBK1;TBK1;TBK1;TBK1;TBK1;TBK1;TBK1;TBK1;TBK1;ENSG00000183735.11;ENSG00000183735.11;ENSG00000183735.11;ENSG00000183735.11;ENSG00000183735.11;ENSG00000183735.11		Promoter_Associated	TRUE
cg03259564_TC11	-0.101062	0.00160475	0.00124829	0.999957	chr16	1081805	chr16:1078223-1080394	Shore					FALSE
cg05395852_BC21	0.0573457	0.00179041	0.00124857	0.999957	chr7	129110330		OpenSea					FALSE
cg23290335_TC21	-0.0255488	0.00160597	0.00124928	0.999957	chr10	130180623		OpenSea	exon_12;3UTR	GLRX3;GLRX3			FALSE
cg21783183_TC21	0.087272	0.00179284	0.00125037	0.999957	chr7	71669547		OpenSea					FALSE
cg22279720_TC21	0.0759679	0.00179372	0.00125101	0.999957	chr10	33314944		OpenSea					FALSE
cg15970068_BC21	0.131488	0.00179707	0.00125349	0.999957	chr2	178746118		OpenSea	exon_46	TTN			FALSE
cg08851591_TC11	0.0117499	0.00179753	0.00125383	0.999957	chr19	43755000	chr19:43754461-43755191	Island	TSS200;TSS200;TSS200;TSS1500;TSS1500;TSS1500;TSS1500;TSS1500;TSS200	ENSG00000105771.14;ENSG00000105771.14;ENSG00000105771.14;ENSG00000105771.14;ENSG00000105771.14;ENSG00000105771.14;ENSG00000105771.14;ENSG00000105771.14;ENSG00000105771.14		Promoter_Associated	TRUE
cg14753070_TC21	0.11094	0.00179767	0.00125393	0.999957	chr19	14053030		OpenSea	exon_14;3UTR	IL27RA;IL27RA			FALSE
cg07888738_BC21	-0.0147655	0.00161314	0.00125513	0.999957	chr2	110212778	chr2:110212275-110212645	Shore	exon_8;5UTR;TSS1500	MTLN;MTLN;ENSG00000175701.11		NonGene_Associated	TRUE
cg17478016_BC21	0.0428264	0.00180081	0.00125625	0.999957	chr6	169446591		OpenSea					FALSE
cg23560751_BC21	0.146636	0.00180149	0.00125675	0.999957	chr2	10087627		OpenSea					FALSE
cg19787465_BC11	-0.0271035	0.00161729	0.00125851	0.999957	chr11	369155	chr11:369451-370214	Shore	TSS1500;TSS1500	ENSG00000182272.12;ENSG00000182272.12			FALSE
cg14175803_BC21	-0.0894841	0.0016178	0.00125894	0.999957	chr16	89961292	chr16:89964101-89964332	Shelf	TSS1500	ENSG00000140995.17			FALSE
cg07085156_TC21	-0.0604639	0.00161828	0.00125932	0.999957	chr10	63199764		OpenSea					FALSE
cg20715218_BC11	-0.17306	0.00162168	0.0012621	0.999957	chr10	93703228	chr10:93702403-93702743	Shore	TSS1500	ENSG00000148690.12			FALSE
cg24400656_TC21	0.146974	0.00180894	0.00126225	0.999957	chr6	164086215		OpenSea	TSS1500	ENSG00000260422.1			FALSE
cg15256539_BC11	-0.00899876	0.00162258	0.00126284	0.999957	chr6	80106717	chr6:80106402-80106969	Island	exon_1;exon_1;exon_1	BCKDHB;BCKDHB;BCKDHB		Promoter_Associated	TRUE
cg18927565_BC11	0.0127081	0.00181068	0.00126353	0.999957	chr5	111512232	chr5:111512122-111512747	Island	exon_1;exon_1	STARD4-AS1;STARD4-AS1		Promoter_Associated	TRUE
cg06286127_BC21	-0.0586925	0.00162398	0.00126397	0.999957	chr8	122972419		OpenSea					FALSE
cg13823188_BC11	-0.00857201	0.0016272	0.0012666	0.999957	chr17	82081368	chr17:82078847-82079598;chr17:82080995-82081374;chr17:82083175-82083590;chr17:82083777-82084151;chr17:82085023-82085413	Island	TSS1500;TSS1500;TSS1500	ENSG00000169710.9;ENSG00000169710.9;ENSG00000169710.9			FALSE
cg00475403_TC21	-0.0345842	0.00162856	0.00126771	0.999957	chr2	234979741		OpenSea	exon_2	SH3BP4			FALSE
cg24148931_BC21	0.0774661	0.0018169	0.00126813	0.999957	chr6	168890364	chr6:168886100-168886593	Shelf					FALSE
cg06177794_BC21	0.0900452	0.0018179	0.00126886	0.999957	chr8	19951020		OpenSea			chr8:19950985-19951245		FALSE
cg14641705_BC11	0.010278	0.00181861	0.00126939	0.999957	chr3	196082008	chr3:196081407-196082348	Island	exon_1;exon_1;exon_1;exon_1;5UTR;5UTR;5UTR;TSS1500	TFRC;TFRC;TFRC;TFRC;TFRC;TFRC;TFRC;ENSG00000072274.14		Promoter_Associated	TRUE
cg01434934_BC21	-0.0556047	0.00163089	0.00126961	0.999957	chr5	10151724		OpenSea					FALSE
cg26482442_BC21	0.14311	0.00182231	0.00127212	0.999957	chr22	46672224	chr22:46673626-46673903	Shore				Gene_Associated	TRUE
cg05654780_BC21	0.182431	0.00182384	0.00127325	0.999957	chr1	156655580	chr1:156657550-156657784	Shore	TSS1500	ENSG00000132692.19			FALSE
cg22548275_TC21	0.0950982	0.00182494	0.00127406	0.999957	chr15	57236131		OpenSea					FALSE
cg13521223_TC21	0.139992	0.00183056	0.00127822	0.999957	chr9	25992168		OpenSea					FALSE
cg16976520_TC21	-0.072238	0.00164412	0.00128042	0.999957	chr7	158796161		OpenSea					FALSE
cg24341006_TC11	-0.0123978	0.00164476	0.00128094	0.999957	chr12	53006254	chr12:53006088-53007112	Island	TSS200;TSS200;TSS200;TSS1500;TSS1500;TSS1500;TSS1500;TSS1500;TSS1500;TSS1500;TSS1500	ENSG00000063046.18;ENSG00000063046.18;ENSG00000063046.18;ENSG00000063046.18;ENSG00000063046.18;ENSG00000063046.18;ENSG00000063046.18;ENSG00000063046.18;ENSG00000063046.18;ENSG00000063046.18;ENSG00000063046.18		Promoter_Associated	TRUE
cg06147728_BC21	-0.0674436	0.00164513	0.00128124	0.999957	chr3	43893038		OpenSea					FALSE
cg22975686_TC21	0.0585801	0.00183537	0.00128177	0.999957	chr17	76525514		OpenSea					FALSE
cg17259358_BC21	-0.0445412	0.00164678	0.00128259	0.999957	chr6	98825509	chr6:98824518-98825138;chr6:98827887-98828162	Shore					FALSE
cg14787811_TC21	0.0826963	0.00183737	0.00128324	0.999957	chr6	146892609		OpenSea					FALSE
cg10128622_BC21	0.122574	0.0018377	0.00128349	0.999957	chr6	135197447		OpenSea	TSS1500	ENSG00000236703.1			FALSE
cg22400782_BC21	0.0292517	0.00184011	0.00128527	0.999957	chr9	122334227		OpenSea					FALSE
cg21238410_BC21	0.109303	0.0018403	0.00128541	0.999957	chr16	19853291		OpenSea					FALSE
cg18788974_BC21	-0.0435153	0.00165066	0.00128576	0.999957	chr9	130043829	chr9:130042000-130043724	Shore	TSS1500;TSS1500;TSS1500;TSS1500;TSS1500;TSS1500	ENSG00000187239.18;ENSG00000187239.18;ENSG00000187239.18;ENSG00000187239.18;ENSG00000187239.18;ENSG00000270755.1		Promoter_Associated	TRUE
cg14978687_BC21	0.0780452	0.00184136	0.00128619	0.999957	chr19	35351528	chr19:35351527-35352284	Island	exon_2;5UTR	FFAR1;FFAR1		Unclassified_Cell_type_specific	TRUE
cg07510014_BC21	0.207332	0.00184158	0.00128635	0.999957	chr4	187208066		OpenSea					FALSE
cg11905324_TC21	0.192193	0.00184507	0.00128893	0.999957	chr8	48904707		OpenSea					FALSE
cg26232708_BC21	0.0126261	0.0018471	0.00129043	0.999957	chr9	33816801	chr9:33816800-33818302	Island	TSS1500	ENSG00000107341.5		Promoter_Associated	TRUE
cg25581048_BC21	-0.025909	0.00165727	0.00129116	0.999957	chr20	63690899	chr20:63687006-63687305;chr20:63689700-63689906	Shore	exon_27;exon_27;exon_27;exon_26;exon_27;exon_4;exon_3;exon_24;exon_10;exon_7;exon_4;3UTR	RTEL1;RTEL1;RTEL1;RTEL1;RTEL1;RTEL1;RTEL1;RTEL1-TNFRSF6B;RTEL1-TNFRSF6B;RTEL1-TNFRSF6B;RTEL1-TNFRSF6B;RTEL1-TNFRSF6B		Unclassified_Cell_type_specific	TRUE
cg04170583_TC21	0.0279405	0.00184865	0.00129158	0.999957	chr2	219723746		OpenSea					FALSE
cg00558224_BC21	-0.136179	0.0016581	0.00129184	0.999957	chr5	178164099	chr5:178165654-178165985	Shore				Unclassified	TRUE
cg22795590_BC21	-0.0301028	0.00165924	0.00129276	0.999957	chr2	212537077	chr2:212537456-212538523	Shore					FALSE
cg01499531_TC21	-0.0534399	0.00166003	0.00129341	0.999957	chr4	10657168		OpenSea	TSS1500	ENSG00000109684.16			FALSE
cg23704055_BC21	-0.0650032	0.00166419	0.00129681	0.999957	chr8	125372351		OpenSea				NonGene_Associated_Cell_type_specific	TRUE
cg21653603_BC21	0.396878	0.00185975	0.00129978	0.999957	chr2	47725638		OpenSea					FALSE
cg19017679_TC21	-0.0319604	0.00166845	0.00130029	0.999957	chr13	95105232		OpenSea					FALSE
cg15028368_TC21	0.159177	0.00186075	0.00130052	0.999957	chr10	48608207	chr10:48604807-48605307	Shelf				Unclassified	TRUE
cg22034261_BC21	0.0799782	0.00186281	0.00130205	0.999957	chr1	192644522		OpenSea	TSS200	ENSG00000127074.15			FALSE
cg19383244_BC21	-0.110559	0.001671	0.00130238	0.999957	chr5	81395357	chr5:81393813-81394409	Shore	TSS1500;TSS1500	ENSG00000172497.9;ENSG00000172497.9			FALSE
cg10805564_TC21	-0.0598985	0.00167126	0.00130259	0.999957	chr14	104385495		OpenSea					FALSE
cg02932536_TC21	-0.212419	0.00167286	0.0013039	0.999957	chr2	66334862		OpenSea					FALSE
cg16523422_TC21	0.104914	0.00186552	0.00130405	0.999957	chr19	53941174	chr19:53941977-53942491	Shore					FALSE
cg10975449_BC11	-0.00510665	0.00167326	0.00130422	0.999957	chr19	2328574	chr19:2328365-2329090	Island	exon_1;exon_1;exon_1;exon_1;5UTR;5UTR;5UTR;TSS200;TSS200;TSS200;TSS200;TSS200;TSS200;TSS200;TSS200	LSM7;LSM7;LSM7;LSM7;LSM7;LSM7;LSM7;ENSG00000130332.15;ENSG00000005206.17;ENSG00000005206.17;ENSG00000005206.17;ENSG00000005206.17;ENSG00000005206.17;ENSG00000005206.17;ENSG00000005206.17		Promoter_Associated	TRUE
cg01331907_BC21	-0.0966691	0.00167451	0.00130525	0.999957	chr22	46929857		OpenSea					FALSE
cg04734103_TC21	-0.0306412	0.00167772	0.00130787	0.999957	chr12	120267774	chr12:120265173-120265738	Shelf					FALSE
cg19411980_TC21	-0.0256495	0.00167827	0.00130832	0.999957	chr17	18153074		OpenSea	TSS1500;TSS1500;TSS1500;TSS1500;TSS1500;TSS1500;TSS1500	ENSG00000091536.20;ENSG00000091536.20;ENSG00000091536.20;ENSG00000091536.20;ENSG00000091536.20;ENSG00000091536.20;ENSG00000091536.20			FALSE
cg20056922_BC21	0.050935	0.00187152	0.00130849	0.999957	chr5	124986603		OpenSea					FALSE
cg05518088_TC21	0.0558428	0.00187234	0.00130909	0.999957	chr3	34422062		OpenSea					FALSE
cg23923428_TC21	0.10728	0.00187254	0.00130924	0.999957	chr19	2711715		OpenSea			chr19:2711593-2711806		FALSE
cg26684673_TC21	-0.0470989	0.00168033	0.00131	0.999957	chr11	122672720		OpenSea				Unclassified_Cell_type_specific	TRUE
cg17344321_TC21	0.0388685	0.00187636	0.00131207	0.999957	chr7	22577763		OpenSea			chr7:22577369-22578164		FALSE
cg06021534_BC21	-0.0602216	0.00168507	0.00131388	0.999957	chr8	119053348		OpenSea					FALSE
cg07397372_TC21	-0.0260908	0.00168607	0.0013147	0.999957	chr1	28736412	chr1:28736554-28737803	Shore	TSS1500;TSS1500;TSS1500;TSS1500;TSS1500;TSS1500;exon_1;TSS1500;TSS1500	ENSG00000198492.16;ENSG00000198492.16;ENSG00000198492.16;ENSG00000198492.16;ENSG00000198492.16;ENSG00000198492.16;ENSG00000289291;ENSG00000198492.16;ENSG00000198492.16		Promoter_Associated	TRUE
cg09062766_BC21	0.171273	0.00188438	0.001318	0.999957	chr6	2719081		OpenSea					FALSE
cg04167145_TC21	0.0697368	0.00188555	0.00131887	0.999957	chr2	219532007		OpenSea	exon_3;exon_3;exon_3;exon_3;exon_3;exon_3	ASIC4;ASIC4;ASIC4;ASIC4;ASIC4;ASIC4			FALSE
cg01044293_TC21	-0.0356001	0.00169505	0.00132204	0.999957	chr2	172431741	chr2:172427371-172428455	Shelf					FALSE
cg16151093_BC21	0.0233474	0.00189141	0.0013232	0.999957	chr11	29334307		OpenSea					FALSE
cg06256838_BC21	0.0337261	0.00189144	0.00132322	0.999957	chr1	68155241		OpenSea	exon_4;exon_4;exon_3;exon_3;exon_3;exon_3;exon_4;exon_4;exon_4;TSS200	WLS;WLS;WLS;WLS;WLS;WLS;WLS;WLS;WLS;ENSG00000116729.14			FALSE
cg12509887_BC21	-0.116349	0.00169685	0.00132351	0.999957	chr19	13013477	chr19:13010223-13013554;chr19:13013755-13013974;chr19:13014145-13014445	Island				Unclassified_Cell_type_specific	TRUE
cg04207869_TC21	-0.0570401	0.00169762	0.00132414	0.999957	chr9	7394261		OpenSea					FALSE
cg18981999_TC11	0.0641274	0.00189784	0.00132796	0.999957	chr8	43551268		OpenSea					FALSE
cg10000677_BC21	0.0533517	0.00189862	0.00132854	0.999957	chr6	116406937		OpenSea					FALSE
cg03805187_BC21	-0.039248	0.00170367	0.00132908	0.999957	chr2	172376256		OpenSea					FALSE
cg24808070_BC11	-0.0104823	0.00170424	0.00132955	0.999957	chr10	27744627	chr10:27741253-27746282	Island	TSS1500;TSS200	ENSG00000150051.14;ENSG00000230500.1			FALSE
cg07408835_TC11	-0.0162043	0.00170503	0.0013302	0.999957	chr5	140926792	chr5:140926127-140927608	Island	exon_1;exon_1;5UTR;5UTR	PCDHAC1;PCDHAC1;PCDHAC1;PCDHAC1			FALSE
cg27164386_TC21	0.0263292	0.00190509	0.00133333	0.999957	chr5	94617857	chr5:94618208-94619138	Shore	TSS1500;TSS1500;TSS1500;TSS1500	ENSG00000133302.13;ENSG00000133302.13;ENSG00000133302.13;ENSG00000133302.13		Promoter_Associated	TRUE
cg01423355_TC21	0.020017	0.00190524	0.00133344	0.999957	chr12	55730256	chr12:55728233-55729402	Shore	exon_2;TSS1500;TSS1500;TSS1500;TSS1500;TSS1500	CD63-AS1;ENSG00000135404.12;ENSG00000135404.12;ENSG00000135404.12;ENSG00000135404.12;ENSG00000135404.12		Promoter_Associated	TRUE
cg24340640_BC21	-0.0840295	0.00170951	0.00133387	0.999957	chr10	74263285		OpenSea					FALSE
ch.1.5400413R_BC21	-0.0233455	0.00171174	0.00133569	0.999957	chr1	5417766		OpenSea					FALSE
cg01182310_BC21	-0.0381138	0.00171245	0.00133627	0.999957	chr5	171295842		OpenSea					FALSE
cg22451067_TC21	0.149705	0.00191066	0.00133745	0.999957	chr10	113056452		OpenSea			chr10:113056405-113056603		FALSE
cg26362806_BC21	0.0544455	0.00191182	0.00133831	0.999957	chr1	1243581	chr1:1242505-1242827;chr1:1246376-1247090	Shore	TSS200;TSS1500	ENSG00000184163.3;ENSG00000184163.3			FALSE
cg11868247_BC21	-0.16456	0.00171549	0.00133875	0.999957	chr7	7923179		OpenSea					FALSE
cg11854917_BC11	-0.0150963	0.00171863	0.00134133	0.999957	chr15	56365417	chr15:56365279-56365685	Island	TSS200;TSS200;TSS200;TSS200;TSS200;TSS200	ENSG00000151575.15;ENSG00000151575.15;ENSG00000151575.15;ENSG00000151575.15;ENSG00000151575.15;ENSG00000151575.15		Promoter_Associated	TRUE
cg21899803_BC21	0.0432863	0.00191671	0.00134193	0.999957	chr16	86914730		OpenSea					FALSE
cg15660537_BC21	0.0816584	0.0019175	0.00134252	0.999957	chr10	119702732		OpenSea					FALSE
cg20048685_TC21	-0.1439	0.00172103	0.00134329	0.999957	chr14	104986575	chr14:104985023-104985225;chr14:104985566-104986224	Shore	exon_1;exon_1;exon_1;TSS200	CLBA1;CLBA1;CLBA1;ENSG00000140104.14			FALSE
cg20718181_TC21	0.0751421	0.0019202	0.00134451	0.999957	chr15	82968279		OpenSea					FALSE
cg09466667_BC21	-0.0799022	0.00172325	0.0013451	0.999957	chr3	42099283		OpenSea				Unclassified	TRUE
cg09211763_BC21	-0.0116811	0.0017244	0.00134605	0.999957	chr2	189179778		OpenSea	exon_1;5UTR;TSS200	COL5A2;COL5A2;ENSG00000204262.14		Unclassified_Cell_type_specific	TRUE
cg27354215_TC21	0.0992238	0.0019226	0.0013463	0.999957	chr17	8035197		OpenSea					FALSE
cg20448717_TC11	-0.0122373	0.00172533	0.00134681	0.999957	chr6	7541893	chr6:7541285-7543239	Island	exon_1;exon_1;5UTR;5UTR;TSS1500;TSS1500;TSS200;TSS200	DSP;DSP;DSP;DSP;ENSG00000261189.3;ENSG00000261189.3;ENSG00000096696.15;ENSG00000096696.15		Unclassified	TRUE
cg19908988_TC21	-0.0611251	0.00172558	0.00134702	0.999957	chr14	96269946		OpenSea	TSS1500	ENSG00000258793.1			FALSE
cg02962113_TC21	0.0941152	0.00192377	0.00134716	0.999957	chr1	64686925		OpenSea				Unclassified_Cell_type_specific	TRUE
cg23093404_BC22	0.161734	0.00192734	0.0013498	0.999957	chr2	96934050		OpenSea					FALSE
cg12870308_TC11	0.0338177	0.0019274	0.00134985	0.999957	chr12	38163527	chr12:38163526-38163891	Island	TSS200	ENSG00000201708.1			FALSE
cg22114246_BC21	-0.124342	0.00172959	0.0013503	0.999957	chr1	54425208		OpenSea					FALSE
cg12191970_BC21	-0.124208	0.00173091	0.00135138	0.999957	chr14	39100330	chr14:39102833-39103499	Shelf					FALSE
cg23417677_TC11	-0.0145405	0.00173159	0.00135194	0.999957	chr2	237381181		OpenSea	exon_5;exon_3;exon_4;exon_4;exon_3;exon_5	COL6A3;COL6A3;COL6A3;COL6A3;COL6A3;COL6A3			FALSE
cg05995311_TC21	0.0762422	0.00193437	0.00135501	0.999957	chr19	19571596		OpenSea					FALSE
cg07398555_BC21	-0.0666132	0.00173567	0.00135527	0.999957	chr17	63127125		OpenSea					FALSE
cg00226615_BC21	-0.0363418	0.00173581	0.00135539	0.999957	chr6	31885788	chr6:31889119-31889327	Shelf	exon_1;TSS1500;TSS1500	EHMT2;ENSG00000204371.12;ENSG00000204371.12			FALSE
cg17547192_TC21	-0.0775462	0.00173586	0.00135543	0.999957	chr12	45984687		OpenSea					FALSE
cg12317080_TC11	-0.0134458	0.00173594	0.00135549	0.999957	chr14	59630832	chr14:59630490-59630835	Island	TSS1500;TSS200;TSS1500	ENSG00000139970.18;ENSG00000139970.18;ENSG00000139970.18			FALSE
cg22433677_BC21	0.149283	0.00193659	0.00135666	0.999957	chr7	95900121		OpenSea					FALSE
cg13795344_BC21	-0.0273304	0.0017378	0.00135702	0.999957	chr9	77829566		OpenSea					FALSE
cg01507604_BC21	0.0493252	0.00193717	0.00135709	0.999957	chr5	6586642	chr5:6582769-6583694	Shelf	exon_3;exon_5;exon_4;exon_3;exon_4;exon_3;exon_3;exon_3;exon_2;exon_4;exon_3;exon_4;exon_3	LINC01018;LINC01018;LINC01018;LINC01018;LINC01018;LINC01018;LINC01018;LINC01018;LINC01018;LINC01018;LINC01018;LINC01018;LINC01018			FALSE
cg22973574_TC21	-0.118516	0.00173846	0.00135756	0.999957	chr19	843287	chr19:843468-844593;chr19:846011-846435	Shore	TSS200	ENSG00000196415.10			FALSE
cg08501290_TC21	0.13915	0.00193934	0.00135869	0.999957	chr1	232291405		OpenSea					FALSE
cg14388275_TC21	-0.0265098	0.00174105	0.00135968	0.999957	chr9	133142820	chr9:133144321-133144747	Shore					FALSE
cg07511634_BC21	0.171301	0.00194161	0.00136038	0.999957	chr4	187396477		OpenSea					FALSE
cg23973115_BC11	-0.0795116	0.00174212	0.00136056	0.999957	chr10	60780391	chr10:60778212-60779104	Shore					FALSE
cg25425348_BC21	-0.0386579	0.00174254	0.0013609	0.999957	chr20	53916369		OpenSea				Promoter_Associated	TRUE
cg15686792_BC21	0.058273	0.00194238	0.00136095	0.999957	chr10	122159986	chr10:122163335-122164027	Shelf					FALSE
cg07549449_TC21	-0.0402186	0.00174331	0.00136153	0.999957	chr5	140254230		OpenSea			chr5:140254098-140254501		FALSE
cg01271932_TC21	-0.087282	0.00174435	0.00136238	0.999957	chr7	137287075		OpenSea	TSS1500	ENSG00000202023.1			FALSE
cg08841418_BC21	-0.0596376	0.00174498	0.0013629	0.999957	chr5	163916964		OpenSea			chr5:163916934-163917171		FALSE
cg10668325_TC21	0.163476	0.00194582	0.00136349	0.999957	chr15	89895004	chr15:89893793-89894362	Shore	TSS1500;TSS1500;TSS1500;TSS1500;TSS1500;TSS1500;TSS1500;TSS1500;TSS1500;TSS1500	ENSG00000157823.17;ENSG00000157823.17;ENSG00000157823.17;ENSG00000157823.17;ENSG00000157823.17;ENSG00000157823.17;ENSG00000157823.17;ENSG00000157823.17;ENSG00000157823.17;ENSG00000157823.17			FALSE
cg01180231_BC21	-0.184815	0.00174935	0.00136648	0.999957	chr5	39372309		OpenSea	exon_14;exon_15;exon_14;3UTR;3UTR;3UTR;TSS1500	DAB2;DAB2;DAB2;DAB2;DAB2;DAB2;ENSG00000113600.12			FALSE
cg24168615_TC21	0.10133	0.00195048	0.00136695	0.999957	chr7	26700660		OpenSea					FALSE
cg05349242_BC21	-0.0573488	0.00175031	0.00136727	0.999957	chr14	76789086		OpenSea	exon_10;exon_5;3UTR;3UTR;TSS1500	ANGEL1;ANGEL1;ANGEL1;ANGEL1;ENSG00000286437.1			FALSE
cg00302733_TC11	0.0171113	0.00195474	0.00137011	0.999957	chr1	16499881	chr1:16498643-16499882	Island	TSS1500;TSS1500	ENSG00000080947.15;ENSG00000080947.15	chr1:16499820-16499943	Promoter_Associated	TRUE
cg21515056_TC21	0.043646	0.00195711	0.00137186	0.999957	chr16	54030402		OpenSea					FALSE
cg19006283_BC21	0.152121	0.00195908	0.00137333	0.999957	chr20	33901137		OpenSea					FALSE
cg24153143_BC21	0.0386217	0.00196416	0.0013771	0.999957	chr6	123636892		OpenSea	exon_1;exon_1;exon_1;exon_1;exon_1;5UTR;5UTR;5UTR;5UTR;5UTR	TRDN;TRDN;TRDN;TRDN;TRDN;TRDN;TRDN;TRDN;TRDN;TRDN			FALSE
cg11319586_BC21	0.119277	0.00197067	0.00138192	0.999957	chr10	60495538		OpenSea					FALSE
cg16396417_TC21	0.0260765	0.00197254	0.00138331	0.999957	chr19	58573892	chr19:58572834-58573692;chr19:58575330-58575932	Shore	exon_6;TSS1500;TSS1500;TSS1500;TSS1500;TSS1500;TSS1500	MZF1-AS1;ENSG00000099326.9;ENSG00000099326.9;ENSG00000099326.9;ENSG00000099326.9;ENSG00000099326.9;ENSG00000099326.9			FALSE
cg24997332_TC21	0.120678	0.00197287	0.00138356	0.999957	chr20	14765404		OpenSea					FALSE
cg20105384_TC11	-0.0100425	0.00177045	0.00138376	0.999957	chr13	72727838	chr13:72727092-72728016	Island	exon_1;exon_1;5UTR;5UTR;TSS200;TSS200;TSS200;TSS200;TSS200;TSS200;TSS200;TSS1500	BORA;BORA;BORA;BORA;ENSG00000136122.18;ENSG00000136122.18;ENSG00000136122.18;ENSG00000136122.18;ENSG00000136122.18;ENSG00000136122.18;ENSG00000136122.18;ENSG00000204899.6		Promoter_Associated	TRUE
cg12090326_BC21	0.0373326	0.00197666	0.00138636	0.999957	chr6	2265305		OpenSea	exon_3	GMDS-DT			FALSE
cg02329994_TC21	-0.0634454	0.00177718	0.00138928	0.999957	chr7	139951291	chr7:139950675-139950880	Shore					FALSE
cg05720154_BC21	-0.113036	0.00177833	0.00139023	0.999957	chr12	125686597	chr12:125683894-125684112	Shelf					FALSE
cg05415131_BC11	-0.0129241	0.00177904	0.0013908	0.999957	chr11	59173393	chr11:59171573-59172835;chr11:59173357-59173579	Island					FALSE
cg06171908_TC21	0.172563	0.00198268	0.00139083	0.999957	chr19	57118972	chr19:57118971-57119265	Island	TSS200;TSS1500;TSS1500	ENSG00000131864.11;ENSG00000131864.11;ENSG00000131864.11			FALSE
cg09411462_BC21	0.104991	0.00198577	0.00139312	0.999957	chr18	68917041		OpenSea					FALSE
cg23114746_TC11	-0.00625574	0.00178189	0.00139314	0.999957	chr17	49415076		OpenSea	TSS200;TSS1500;TSS200;TSS1500;TSS1500;TSS200;TSS1500;TSS200;TSS200;TSS200;TSS200;TSS1500;TSS200;TSS200	ENSG00000167085.14;ENSG00000167085.14;ENSG00000167085.14;ENSG00000167085.14;ENSG00000167085.14;ENSG00000167085.14;ENSG00000167085.14;ENSG00000167085.14;ENSG00000167085.14;ENSG00000167085.14;ENSG00000167085.14;ENSG00000167085.14;ENSG00000167085.14;ENSG00000167085.14		Promoter_Associated	TRUE
cg20960456_TC21	-0.0614134	0.00178297	0.00139403	0.999957	chr9	96496517	chr9:96496512-96497239	Island					FALSE
cg09118550_BC11	0.00721213	0.00198909	0.00139559	0.999957	chr10	15097358	chr10:15096966-15097852	Island	exon_1;exon_1;exon_1;exon_1;exon_1;exon_1;5UTR;5UTR;5UTR;5UTR;5UTR;TSS200;TSS200	RPP38;RPP38;RPP38;RPP38;RPP38;RPP38;RPP38;RPP38;RPP38;RPP38;RPP38;ENSG00000176236.6;ENSG00000152464.15		Promoter_Associated	TRUE
cg17803840_BC21	0.0810294	0.00199024	0.00139644	0.999957	chr20	11966055		OpenSea					FALSE
cg21418575_BC21	-0.121399	0.00178597	0.00139648	0.999957	chr3	50338036	chr3:50336833-50338198;chr3:50340372-50341109	Island	exon_1;TSS1500	RASSF1-AS1;ENSG00000068028.18		Promoter_Associated	TRUE
cg24986815_BC21	-0.102284	0.00178623	0.0013967	0.999957	chr1	226941273	chr1:226939368-226940729	Shore			chr1:226941198-226941430		FALSE
cg06367647_BC21	0.0605027	0.00199366	0.00139898	0.999957	chr1	190477699		OpenSea	exon_1;5UTR;TSS1500;TSS1500	BRINP3;BRINP3;ENSG00000237457.6;ENSG00000237457.6			FALSE
cg26617637_BC11	0.0430837	0.00199459	0.00139967	0.999957	chr8	133191096		OpenSea	exon_1;exon_1;exon_1;exon_1;5UTR;5UTR;5UTR;5UTR;TSS200	CCN4;CCN4;CCN4;CCN4;CCN4;CCN4;CCN4;CCN4;ENSG00000104415.14			FALSE
cg09748975_BC11	0.00856523	0.00199479	0.00139982	0.999957	chr4	4862805	chr4:4859521-4860514;chr4:4862729-4863107;chr4:4864711-4865086;chr4:4865659-4867784	Island	exon_2;exon_2	MSX1;MSX1			FALSE
cg08118581_BC21	-0.0613718	0.00179022	0.00139997	0.999957	chr20	655731	chr20:652897-653462	Shelf					FALSE
cg23739262_BC21	0.045557	0.00199542	0.00140029	0.999957	chr18	74634448		OpenSea	exon_2;exon_2;exon_1;exon_1	ZNF407;ZNF407;ZNF407;ZNF407			FALSE
cg14730524_TC21	0.0891099	0.00199597	0.00140069	0.999957	chr11	92883952	chr11:92882669-92883502	Shore					FALSE
cg25100721_BC21	0.024172	0.00199686	0.00140136	0.999957	chr3	42770271	chr3:42773075-42773401	Shelf	TSS1500	ENSG00000225611.3			FALSE
cg21585733_TC21	-0.023289	0.00179522	0.00140407	0.999957	chr11	107928934	chr11:107928418-107929254	Island	TSS1500	ENSG00000110660.15		Unclassified	TRUE
cg07074837_BC21	-0.0257039	0.00179608	0.00140478	0.999957	chr16	75574430		OpenSea	TSS1500	ENSG00000034713.8			FALSE
cg03521317_BC21	0.100874	0.0020015	0.0014048	0.999957	chr8	65473550		OpenSea					FALSE
cg17177277_BC21	0.182032	0.00200391	0.00140659	0.999957	chr12	2294918		OpenSea			chr12:2294811-2295216		FALSE
cg06217267_BC21	0.182218	0.00200395	0.00140662	0.999957	chr4	88661172		OpenSea					FALSE
cg22757977_BC21	-0.135619	0.00179983	0.00140785	0.999957	chr19	9823937	chr19:9827649-9828139	Shelf					FALSE
cg14595673_TC21	0.123536	0.00200617	0.00140827	0.999957	chr10	5293861		OpenSea				Promoter_Associated_Cell_type_specific	TRUE
cg00791022_TC21	-0.0529251	0.0018009	0.00140873	0.999957	chr13	112486639	chr13:112485810-112486013	Shore					FALSE
cg26367077_BC21	0.0641602	0.00200943	0.00141069	0.999957	chr16	21153635		OpenSea					FALSE
cg27307571_TC21	-0.0299089	0.00180362	0.00141096	0.999957	chr17	76032621		OpenSea					FALSE
cg02389342_BC21	-0.0458305	0.00180424	0.00141147	0.999957	chr1	78750281		OpenSea	exon_1	ENSG00000235400	chr1:78750087-78750447		FALSE
cg00377688_BC21	0.0339195	0.00201071	0.00141164	0.999957	chr1	21598916		OpenSea					FALSE
cg01101355_BC21	-0.045991	0.00181063	0.00141671	0.999957	chr20	48805789		OpenSea					FALSE
cg04256907_TC21	-0.0802647	0.00181072	0.00141678	0.999957	chr10	79314020		OpenSea	exon_25;3UTR	ZMIZ1;ZMIZ1			FALSE
cg08168075_TC11	-0.0172422	0.00181107	0.00141707	0.999957	chr19	48680894	chr19:48680241-48680910	Island	exon_5;exon_1	SEC1P;SEC1P			FALSE
cg19652019_TC21	0.134511	0.00201884	0.00141768	0.999957	chr2	101174023		OpenSea			chr2:101173897-101174156	Unclassified	TRUE
cg13754949_BC21	0.0138858	0.0020197	0.00141831	0.999957	chr2	99489195	chr2:99489081-99490696	Island					FALSE
cg02056663_BC21	-0.259906	0.00181446	0.00141985	0.999957	chr1	227298732		OpenSea					FALSE
cg08490304_TC21	-0.126461	0.00181463	0.00141999	0.999957	chr19	1929261		OpenSea				Unclassified_Cell_type_specific	TRUE
cg18267047_BC21	0.157552	0.00202302	0.00142078	0.999957	chr6	30153997		OpenSea	exon_7	TRIM10			FALSE
cg11849039_TC21	-0.0419031	0.00181792	0.00142269	0.999957	chr6	117556279		OpenSea					FALSE
cg02903498_TC21	0.0415987	0.0020263	0.00142322	0.999957	chr4	159342116		OpenSea	TSS1500	ENSG00000109756.10			FALSE
cg13359356_BC21	-0.0428447	0.00182038	0.0014247	0.999957	chr14	24269297	chr14:24271358-24271736	Shelf	exon_7;TSS1500;TSS1500;TSS1500;TSS1500;TSS200	RABGGTA;ENSG00000100949.15;ENSG00000100949.15;ENSG00000100949.15;ENSG00000100949.15;ENSG00000100949.15			FALSE
cg24924502_BC11	0.064111	0.00202854	0.00142488	0.999957	chr17	81135977	chr17:81135898-81136111	Island					FALSE
cg17304327_TC21	-0.144603	0.00182145	0.00142559	0.999957	chr5	17928974		OpenSea					FALSE
cg18092877_BC21	0.059302	0.00202996	0.00142594	0.999957	chr12	111348904		OpenSea	exon_22;3UTR	CUX2;CUX2			FALSE
cg14148681_BC21	-0.0706517	0.00182246	0.00142641	0.999957	chr12	10160591		OpenSea	TSS200	ENSG00000173391.9			FALSE
cg06230206_BC21	-0.0834746	0.00182354	0.0014273	0.999957	chr11	126586224		OpenSea					FALSE
cg00461174_BC21	-0.0286927	0.00182396	0.00142765	0.999957	chr12	14498581		OpenSea	exon_15;3UTR;exon_15;exon_15;3UTR;3UTR	ATF7IP;ATF7IP;ATF7IP;ATF7IP;ATF7IP;ATF7IP			FALSE
cg23617254_TC21	0.0498032	0.00203386	0.00142884	0.999957	chr15	72219596		OpenSea	TSS200	ENSG00000067225.21			FALSE
cg21294788_BC21	-0.0610761	0.00182683	0.00143	0.999957	chr16	25037823		OpenSea					FALSE
cg12776902_BC21	-0.0316821	0.00182979	0.00143243	0.999957	chr4	143531326		OpenSea					FALSE
cg20152424_BC11	0.0211842	0.00204276	0.00143545	0.999957	chr11	576455	chr11:575464-577093	Island	TSS200;TSS200;TSS200;TSS200;TSS200	ENSG00000070047.13;ENSG00000070047.13;ENSG00000070047.13;ENSG00000070047.13;ENSG00000070047.13		Promoter_Associated	TRUE
cg10086720_BC21	0.0231462	0.002045	0.00143711	0.999957	chr6	33201482	chr6:33199994-33200938;chr6:33204512-33205046	Shore	exon_2;exon_1;exon_1;exon_1;exon_1;exon_1;exon_1;exon_1;exon_2;exon_1;exon_2;exon_2;exon_2;exon_2;exon_2;TSS1500;TSS1500;TSS1500;TSS200	SLC39A7;SLC39A7;SLC39A7;SLC39A7;SLC39A7;SLC39A7;SLC39A7;SLC39A7;SLC39A7;SLC39A7;SLC39A7;SLC39A7;SLC39A7;SLC39A7;SLC39A7;ENSG00000204231.11;ENSG00000204231.11;ENSG00000204231.11;ENSG00000112473.19		Unclassified	TRUE
cg06717842_TC21	-0.0252955	0.00183639	0.00143785	0.999957	chr11	119232454		OpenSea	exon_2;exon_2;exon_2;exon_2	CBL;CBL;CBL;CBL			FALSE
cg19579115_BC21	0.139266	0.00204601	0.00143787	0.999957	chr4	187593605		OpenSea	TSS1500	ENSG00000250590.6			FALSE
cg03882262_BC21	-0.0471841	0.00183688	0.00143825	0.999957	chr10	72132498		OpenSea					FALSE
cg00902741_TC21	-0.0379136	0.00183935	0.00144028	0.999957	chr19	48460805	chr19:48461745-48462535	Shore	TSS1500	ENSG00000182324.7			FALSE
cg18214930_TC21	-0.0820176	0.00183998	0.0014408	0.999957	chr14	52787941	chr14:52790946-52791901	Shelf					FALSE
cg04222196_BC21	0.107174	0.00205004	0.00144086	0.999957	chr1	203754667		OpenSea				Unclassified_Cell_type_specific	TRUE
cg00955451_BC21	0.0882441	0.00205183	0.0014422	0.999957	chr15	28921437		OpenSea	TSS200;TSS1500;TSS200;TSS1500	ENSG00000034053.15;ENSG00000034053.15;ENSG00000034053.15;ENSG00000034053.15			FALSE
cg08414393_TC21	-0.12451	0.00184634	0.00144602	0.999957	chr5	116272674		OpenSea					FALSE
cg05096220_BC21	0.149062	0.00205739	0.00144633	0.999957	chr12	2294942		OpenSea			chr12:2294811-2295216		FALSE
cg22950163_BC21	0.0201377	0.0020576	0.00144648	0.999957	chr16	55479613	chr16:55479317-55479614	Island	exon_1;TSS1500;TSS1500	MMP2;ENSG00000087245.13;ENSG00000087245.13			FALSE
cg06024334_TC21	0.0355815	0.00205935	0.00144778	0.999957	chr15	99091044		OpenSea					FALSE
cg26932772_TC21	-0.150631	0.00185074	0.00144963	0.999957	chr12	76085735	chr12:76083937-76085351	Shore	TSS1500;TSS1500;TSS1500;TSS1500;TSS1500;TSS1500;TSS1500;TSS1500;TSS1500;TSS1500;TSS1500;TSS1500;TSS1500;TSS1500;TSS1500;TSS1500;TSS1500;TSS1500	ENSG00000187109.15;ENSG00000187109.15;ENSG00000187109.15;ENSG00000187109.15;ENSG00000187109.15;ENSG00000187109.15;ENSG00000187109.15;ENSG00000187109.15;ENSG00000187109.15;ENSG00000187109.15;ENSG00000187109.15;ENSG00000187109.15;ENSG00000187109.15;ENSG00000187109.15;ENSG00000187109.15;ENSG00000187109.15;ENSG00000187109.15;ENSG00000187109.15			FALSE
cg19092228_BC21	-0.0270767	0.00185115	0.00144997	0.999957	chr3	58068811		OpenSea					FALSE
cg24968203_TC21	0.088	0.00206509	0.00145205	0.999957	chr11	105609683	chr11:105610399-105610695	Shore	TSS1500;TSS1500;TSS1500;TSS1500;TSS1500;TSS1500;TSS1500;TSS1500;TSS1500;TSS1500;TSS1500;TSS1500	ENSG00000152578.13;ENSG00000152578.13;ENSG00000152578.13;ENSG00000152578.13;ENSG00000152578.13;ENSG00000152578.13;ENSG00000152578.13;ENSG00000152578.13;ENSG00000152578.13;ENSG00000152578.13;ENSG00000152578.13;ENSG00000152578.13		Unclassified_Cell_type_specific	TRUE
cg11866396_TC11	0.0204047	0.00206545	0.00145232	0.999957	chr17	5419620	chr17:5419187-5420396	Island	exon_1;exon_1;exon_1;exon_1;exon_1;exon_1;exon_1;exon_1;exon_1;exon_1;exon_1;exon_1;exon_1;exon_1;exon_1;exon_1;exon_1;exon_1;exon_1;exon_1;exon_1;TSS200;TSS200;TSS1500;TSS200;TSS200;TSS200;TSS200;TSS200;TSS200;TSS200;TSS200;TSS1500;TSS1500;TSS1500;TSS1500;TSS1500;TSS1500;TSS1500;TSS1500;TSS1500	NUP88;NUP88;NUP88;NUP88;NUP88;NUP88;NUP88;NUP88;NUP88;NUP88;NUP88;NUP88;NUP88;NUP88;NUP88;NUP88;NUP88;NUP88;NUP88;NUP88;NUP88;ENSG00000108559.13;ENSG00000108559.13;ENSG00000108559.13;ENSG00000129197.15;ENSG00000129197.15;ENSG00000129197.15;ENSG00000129197.15;ENSG00000129197.15;ENSG00000129197.15;ENSG00000129197.15;ENSG00000129197.15;ENSG00000129197.15;ENSG00000129197.15;ENSG00000129197.15;ENSG000…		Promoter_Associated	TRUE
cg09097307_BC21	0.0544348	0.002067	0.00145348	0.999957	chr6	5303525		OpenSea				Unclassified	TRUE
cg08089569_BC21	-0.0323569	0.00185646	0.00145432	0.999957	chr1	180862266		OpenSea	TSS1500	ENSG00000143324.14			FALSE
cg00305585_TC21	-0.0645743	0.00185705	0.00145481	0.999957	chr16	1560897		OpenSea				Promoter_Associated_Cell_type_specific	TRUE
cg00421155_TC21	-0.0805101	0.00185935	0.0014567	0.999957	chr1	24390323		OpenSea					FALSE
cg18548879_TC21	0.147714	0.00207163	0.00145692	0.999957	chr15	41622256	chr15:41621135-41622162	Shore	TSS1500;TSS1500;TSS1500;TSS1500;TSS1500;TSS1500;TSS1500;TSS1500	ENSG00000260926.3;ENSG00000260926.3;ENSG00000260926.3;ENSG00000260926.3;ENSG00000260926.3;ENSG00000260926.3;ENSG00000260926.3;ENSG00000260926.3		Promoter_Associated_Cell_type_specific	TRUE
cg20311037_TC21	0.0122612	0.00207242	0.00145751	0.999957	chr1	173715422		OpenSea	exon_1;TSS200	KLHL20;ENSG00000076321.11		Promoter_Associated	TRUE
cg02953529_TC21	-0.0504714	0.00186114	0.00145817	0.999957	chr16	85372746	chr16:85373708-85373985	Shore				Unclassified	TRUE
cg24997442_BC21	-0.0525787	0.00186336	0.00146	0.999957	chr5	151026396		OpenSea	TSS200;TSS1500	ENSG00000211445.13;ENSG00000211445.13			FALSE
cg25906251_BC21	0.0193573	0.00207612	0.00146026	0.999957	chr3	142722887	chr3:142724003-142725136	Shore	TSS1500;TSS1500;TSS1500	ENSG00000144935.17;ENSG00000144935.17;ENSG00000144935.17			FALSE
cg11050223_TC21	-0.0495828	0.00186424	0.00146072	0.999957	chr7	55191743		OpenSea	exon_21;exon_20;exon_21;exon_8;TSS1500	EGFR;EGFR;EGFR;EGFR;ENSG00000146648.21			FALSE
cg03216952_BC21	0.0889631	0.00207962	0.00146286	0.999957	chr1	35869754		OpenSea	TSS200	ENSG00000092847.14			FALSE
cg14071496_BC11	-0.00310334	0.00186734	0.00146326	0.999957	chr9	14322504	chr9:14322394-14322986	Island	TSS1500;TSS1500;TSS200;TSS1500	ENSG00000147862.18;ENSG00000147862.18;ENSG00000147862.18;ENSG00000147862.18	chr9:14322296-14322911	Promoter_Associated	TRUE
cg07881496_TC21	0.078012	0.00208015	0.00146326	0.999957	chr3	106014321		OpenSea					FALSE
cg23397932_BC21	0.0599977	0.00208225	0.00146482	0.999957	chr4	185036858		OpenSea					FALSE
cg08224773_BC21	-0.025475	0.00188177	0.00147513	0.999957	chr8	11454359		OpenSea				Unclassified_Cell_type_specific	TRUE
cg20506791_TC21	0.0236388	0.00209616	0.00147517	0.999957	chr15	88905039		OpenSea	exon_5;exon_6;3UTR;3UTR;TSS1500;TSS200	MFGE8;MFGE8;MFGE8;MFGE8;ENSG00000140545.16;ENSG00000140545.16		Promoter_Associated	TRUE
cg06574960_BC21	-0.104624	0.00188202	0.00147532	0.999957	chr2	231400373	chr2:231395389-231396423;chr2:231398143-231398833	Shore	exon_2;3UTR	B3GNT7;B3GNT7			FALSE
cg15448394_BC21	-0.134406	0.00188235	0.0014756	0.999957	chr3	57447219		OpenSea					FALSE
cg09377423_TC21	0.0906071	0.00209776	0.00147637	0.999957	chr6	37783532		OpenSea			chr6:37783510-37783721		FALSE
cg11471574_BC21	0.133191	0.00209844	0.00147687	0.999957	chr12	130770860		OpenSea					FALSE
cg19483803_BC21	-0.0769546	0.00188414	0.00147707	0.999957	chr5	37043952		OpenSea					FALSE
cg25356834_TC21	0.126033	0.00209908	0.00147735	0.999957	chr20	48930968		OpenSea			chr20:48930929-48931240		FALSE
cg22447489_TC21	-0.034342	0.00188591	0.00147853	0.999957	chr7	81244388		OpenSea					FALSE
cg18910874_BC21	-0.0399738	0.00188649	0.001479	0.999957	chr11	85809310	chr11:85810967-85811237	Shore			chr11:85809239-85809452	Unclassified_Cell_type_specific	TRUE
cg14524704_TC21	0.0359483	0.00210162	0.00147924	0.999957	chr7	25859548	chr7:25857093-25857305;chr7:25858617-25859151	Shore					FALSE
cg10643316_BC21	-0.114893	0.0018868	0.00147926	0.999957	chr19	37076250	chr19:37078050-37078647	Shore	exon_2	ENSG00000267345			FALSE
cg02367921_BC21	-0.0690308	0.00188791	0.00148017	0.999957	chr1	40038857	chr1:40039739-40041031	Shore	TSS1500;TSS1500;TSS1500	ENSG00000131236.18;ENSG00000131236.18;ENSG00000131236.18			FALSE
cg15863833_BC21	0.123517	0.00210389	0.00148093	0.999957	chr5	134512535		OpenSea					FALSE
cg25074639_TC11	-0.0043677	0.00189031	0.00148214	0.999957	chr16	4538666	chr16:4537835-4538889	Island	TSS200;TSS200;TSS1500	ENSG00000089486.17;ENSG00000089486.17;ENSG00000089486.17		Promoter_Associated	TRUE
cg24345202_TC21	0.0737941	0.0021065	0.00148288	0.999957	chr11	16795333		OpenSea	TSS200	ENSG00000166689.18			FALSE
cg14809958_TC21	0.0644988	0.00211318	0.00148785	0.999957	chr1	914096	chr1:908919-910503	Shelf	exon_2;TSS200	ENSG00000230699;ENSG00000241180.1			FALSE
cg20750367_BC21	0.0269757	0.00211481	0.00148906	0.999957	chr4	121462859		OpenSea				Unclassified_Cell_type_specific	TRUE
cg22653717_TC11	-0.00836712	0.00190021	0.00149028	0.999957	chr2	195657032	chr2:195656831-195658226	Island	TSS200;TSS200;TSS200;TSS1500;TSS1500	ENSG00000196950.14;ENSG00000196950.14;ENSG00000196950.14;ENSG00000196950.14;ENSG00000196950.14		Unclassified	TRUE
cg03929575_BC21	0.137679	0.00211795	0.0014914	0.999957	chr12	29756189		OpenSea					FALSE
cg05700406_TC11	-0.0125351	0.00190366	0.00149312	0.999957	chr14	92923208	chr14:92922900-92923554	Island	exon_1;exon_1;exon_1;5UTR;5UTR;5UTR;TSS200	CHGA;CHGA;CHGA;CHGA;CHGA;CHGA;ENSG00000100604.13			FALSE
cg03065168_BC21	0.100844	0.00212079	0.00149351	0.999957	chr1	16133744		OpenSea	TSS200	ENSG00000142627.13			FALSE
cg26574794_BC21	0.021536	0.00212807	0.00149894	0.999957	chr1	150809325		OpenSea	exon_1;exon_1;TSS1500;TSS1500;TSS1500;TSS1500;TSS1500;TSS1500;TSS1500;TSS200;TSS1500;TSS1500;TSS1500	CTSK;CTSK;ENSG00000143387.14;ENSG00000143387.14;ENSG00000143387.14;ENSG00000143387.14;ENSG00000143387.14;ENSG00000143387.14;ENSG00000143387.14;ENSG00000143387.14;ENSG00000143387.14;ENSG00000143387.14;ENSG00000143387.14			FALSE
cg03719908_BC21	-0.101431	0.00191503	0.00150247	0.999957	chr14	104701791	chr14:104700940-104701164;chr14:104701326-104701792	Island	TSS1500	ENSG00000203485.14			FALSE
cg16831185_BC21	0.0599972	0.0021341	0.00150343	0.999957	chr17	30831512	chr17:30831860-30832405	Shore	TSS1500;TSS1500	ENSG00000176208.9;ENSG00000176208.9		Promoter_Associated	TRUE
cg18222865_BC21	-0.0744762	0.00191826	0.00150512	0.999957	chr11	14643143	chr11:14643507-14644657;chr11:14644785-14645128	Shore	TSS1500;TSS1500;TSS1500	ENSG00000152270.9;ENSG00000152270.9;ENSG00000152270.9			FALSE
cg17120764_TC11	0.0135445	0.00213759	0.00150603	0.999957	chr10	88990492	chr10:88990536-88991383	Shore	exon_4;exon_1;TSS200;TSS200;TSS200;TSS200;TSS200;TSS1500;TSS1500;TSS1500;TSS1500;TSS1500;TSS1500;TSS1500;TSS1500;TSS1500;TSS1500;TSS1500;TSS1500;TSS1500;TSS1500;TSS1500;TSS1500;TSS1500;TSS1500;TSS1500;TSS1500;TSS1500;TSS1500;TSS1500;TSS1500;TSS1500;TSS1500;TSS1500;TSS1500;TSS1500;TSS1500;TSS1500;TSS1500;TSS1500;TSS1500;TSS1500;TSS1500;TSS1500;TSS1500;TSS1500;TSS1500;TSS1500;TSS1500;TSS1500;TSS150…	FAS;ENSG00000286116;ENSG00000026103.25;ENSG00000026103.25;ENSG00000026103.25;ENSG00000026103.25;ENSG00000026103.25;ENSG00000026103.25;ENSG00000026103.25;ENSG00000026103.25;ENSG00000026103.25;ENSG00000026103.25;ENSG00000026103.25;ENSG00000026103.25;ENSG00000026103.25;ENSG00000026103.25;ENSG00000026103.25;ENSG00000026103.25;ENSG00000026103.25;ENSG00000026103.25;ENSG00000026103.25;ENSG00000026103.25…			FALSE
cg09595539_BC21	0.12683	0.00214004	0.00150786	0.999957	chr18	68930660		OpenSea					FALSE
cg03424273_BC21	0.192146	0.00214292	0.00151	0.999957	chr20	20460049		OpenSea					FALSE
cg08075204_BC11	-0.0110158	0.00192669	0.00151206	0.999957	chr12	51324328	chr12:51324062-51324372	Island	TSS1500;TSS200;TSS200;TSS200;TSS200;TSS1500;TSS1500	ENSG00000110934.13;ENSG00000110934.13;ENSG00000110934.13;ENSG00000110934.13;ENSG00000110934.13;ENSG00000110934.13;ENSG00000110934.13		Promoter_Associated	TRUE
cg11632019_BC21	0.030714	0.00214572	0.00151209	0.999957	chr7	121520232		OpenSea				Unclassified_Cell_type_specific	TRUE
cg05953927_BC11	0.00703738	0.00214581	0.00151216	0.999957	chr3	113211935	chr3:113211590-113212659	Island	exon_1;exon_1;exon_1;exon_1;5UTR;5UTR;5UTR;5UTR;TSS1500;TSS1500;TSS1500;TSS1500;TSS1500	BOC;BOC;BOC;BOC;BOC;BOC;BOC;BOC;ENSG00000144857.15;ENSG00000144857.15;ENSG00000144857.15;ENSG00000144857.15;ENSG00000144857.15			FALSE
cg11051192_TC21	-0.0712289	0.0019306	0.00151528	0.999957	chr12	8939331		OpenSea	exon_15;exon_16;exon_14;exon_16;3UTR	PHC1;PHC1;PHC1;PHC1;PHC1			FALSE
cg01878750_TC21	-0.0452374	0.00193203	0.00151645	0.999957	chr7	2736372	chr7:2734810-2735021	Shore				Unclassified_Cell_type_specific	TRUE
cg15390560_TC11	0.00735317	0.00215501	0.00151902	0.999957	chr1	53439470	chr1:53438467-53439585	Island	exon_1;exon_1;TSS200	SLC25A3P1;SLC25A3P1;ENSG00000236253.7			FALSE
cg14314397_BC21	0.0352975	0.00215501	0.00151902	0.999957	chr9	129336773	chr9:129336844-129337337	Shore	exon_1;TSS200;TSS200;TSS200;TSS200;TSS200;TSS200;TSS200	LINC01503;ENSG00000233901.8;ENSG00000233901.8;ENSG00000233901.8;ENSG00000233901.8;ENSG00000233901.8;ENSG00000233901.8;ENSG00000233901.8		Unclassified_Cell_type_specific	TRUE
cg08840232_BC21	0.0739246	0.00215517	0.00151914	0.999957	chr5	167802987		OpenSea					FALSE
cg05538163_TC21	-0.0582403	0.00193629	0.00151996	0.999957	chr9	16371532		OpenSea					FALSE
cg21585980_TC21	-0.0449853	0.00193794	0.00152132	0.999957	chr5	151454297		OpenSea					FALSE
cg21197375_BC11	0.00991526	0.0021583	0.00152147	0.999957	chr1	1324296	chr1:1324263-1325255;chr1:1327285-1328040	Island	TSS1500;TSS1500;TSS1500	ENSG00000224051.7;ENSG00000224051.7;ENSG00000224051.7		Promoter_Associated	TRUE
cg25558339_BC21	-0.0793683	0.00194066	0.00152356	0.999957	chr20	62980742	chr20:62980932-62981149	Shore					FALSE
cg24201793_BC11	-0.0547327	0.00194137	0.00152414	0.999957	chr2	9004635	chr2:9002998-9004501	Shore	exon_1;TSS1500;TSS1500;TSS1500;TSS1500	ENSG00000290023;ENSG00000143797.12;ENSG00000143797.12;ENSG00000143797.12;ENSG00000143797.12			FALSE
cg01582015_BC21	0.0937948	0.00216498	0.00152645	0.999957	chr3	13305832		OpenSea					FALSE
cg17599919_BC21	-0.165265	0.0019476	0.00152927	0.999957	chr9	7273780		OpenSea					FALSE
cg24785974_BC21	-0.0241252	0.00194765	0.00152931	0.999957	chr8	41589418		OpenSea					FALSE
cg26551975_BC11	0.0496386	0.00216911	0.00152953	0.999957	chr7	27171936	chr7:27169252-27169964;chr7:27172797-27174777	Shore	exon_2;exon_2;exon_2;exon_2;exon_2;TSS1500	HOXA10;HOXA10;HOXA10;HOXA10;HOXA10;ENSG00000078399.19			FALSE
cg14374994_BC21	-0.0838282	0.00194813	0.00152971	0.999957	chr9	5543782		OpenSea					FALSE
cg14479754_TC21	0.0184745	0.00217097	0.00153092	0.999957	chr21	43866572	chr21:43864271-43866018	Shore	TSS200;TSS1500	ENSG00000160216.21;ENSG00000160216.21			FALSE
cg16487904_BC21	0.0906176	0.00217343	0.00153276	0.999957	chr11	66029396	chr11:66025261-66025462	Shelf					FALSE
cg13448401_TC11	-0.00528324	0.00195214	0.00153301	0.999957	chr16	46689136	chr16:46688652-46690195	Island	exon_1;exon_1;exon_1;exon_1;exon_1;5UTR;5UTR;5UTR;5UTR;TSS1500;TSS1500;TSS1500;TSS1500;TSS1500;TSS1500	VPS35;VPS35;VPS35;VPS35;VPS35;VPS35;VPS35;VPS35;VPS35;ENSG00000091651.9;ENSG00000091651.9;ENSG00000091651.9;ENSG00000091651.9;ENSG00000091651.9;ENSG00000091651.9		Promoter_Associated	TRUE
cg02590060_TC21	0.196863	0.00217398	0.00153316	0.999957	chr1	53219716	chr1:53220224-53220719	Shore	exon_1;exon_2;TSS1500;TSS1500;TSS1500	CZIB;CZIB;ENSG00000162384.14;ENSG00000162384.14;ENSG00000259818.1			FALSE
cg24173884_TC21	-0.083154	0.00195298	0.0015337	0.999957	chr1	51729998	chr1:51729356-51730149	Island	exon_1;exon_1;exon_1;exon_1;exon_1;exon_1;exon_1;5UTR;5UTR;5UTR;TSS200	OSBPL9;OSBPL9;OSBPL9;OSBPL9;OSBPL9;OSBPL9;OSBPL9;OSBPL9;OSBPL9;OSBPL9;ENSG00000117859.19		Promoter_Associated	TRUE
cg26366371_TC21	0.113675	0.00217737	0.0015357	0.999957	chr1	245500777		OpenSea					FALSE
cg17815886_BC21	-0.166038	0.00195733	0.00153728	0.999957	chr4	94561188		OpenSea					FALSE
cg21546874_TC11	-0.00654695	0.00195804	0.00153786	0.999957	chr1	9234512	chr1:9234342-9235393	Island	TSS1500	ENSG00000049239.13		Promoter_Associated	TRUE
cg24200419_TC21	0.0380795	0.00218091	0.00153834	0.999957	chr19	15311508		OpenSea					FALSE
cg02543672_TC21	0.0652901	0.00218463	0.00154111	0.999957	chr16	4239827		OpenSea	TSS200	ENSG00000185739.13			FALSE
cg27571676_TC11	0.00512478	0.00218608	0.00154219	0.999957	chr16	88027612	chr16:88027516-88027989	Island	exon_8;exon_8;exon_7;exon_8;exon_7;exon_7;exon_7;exon_8;exon_8;exon_3	BANP;BANP;BANP;BANP;BANP;BANP;BANP;BANP;BANP;BANP			FALSE
cg10168687_TC21	-0.0257162	0.00196533	0.00154387	0.999957	chr19	45467707	chr19:45467703-45469410	Island	TSS1500;TSS1500;TSS1500;TSS1500;TSS1500;TSS1500;TSS1500;TSS1500	ENSG00000125740.14;ENSG00000125740.14;ENSG00000125740.14;ENSG00000125740.14;ENSG00000125740.14;ENSG00000125740.14;ENSG00000125740.14;ENSG00000125740.14		Promoter_Associated	TRUE
cg21934593_BC21	0.101479	0.00218837	0.0015439	0.999957	chr12	115620111		OpenSea	exon_2	ENSG00000257407			FALSE
cg02116996_TC21	0.0690457	0.00218967	0.00154487	0.999957	chr6	30158587		OpenSea	exon_3;exon_3	TRIM10;TRIM10			FALSE
cg14331148_TC11	0.00927528	0.00219013	0.00154521	0.999957	chr19	47048635	chr19:47045193-47046236;chr19:47048129-47048879	Island	TSS200	ENSG00000130748.7		Promoter_Associated	TRUE
cg00807559_TC21	0.0761348	0.0021902	0.00154527	0.999957	chr2	39541049		OpenSea					FALSE
cg26648455_BC21	-0.0572127	0.0019695	0.0015473	0.999957	chr7	19696391		OpenSea	exon_4;3UTR	POLR1F;POLR1F			FALSE
cg00863826_TC21	-0.0751423	0.00196968	0.00154745	0.999957	chr4	87831528		OpenSea	TSS1500;TSS1500;TSS1500;TSS1500;TSS1500;TSS1500	ENSG00000152595.17;ENSG00000152595.17;ENSG00000152595.17;ENSG00000152595.17;ENSG00000152595.17;ENSG00000152595.17			FALSE
cg17335347_BC11	-0.0106157	0.00197024	0.00154791	0.999957	chr4	80266438	chr4:80266340-80266759	Island	TSS1500;TSS1500;TSS1500;TSS1500	ENSG00000138675.17;ENSG00000138675.17;ENSG00000138675.17;ENSG00000138675.17			FALSE
cg14332225_BC21	-0.107854	0.00197297	0.00155016	0.999957	chr7	141703126	chr7:141701632-141702407	Shore	TSS1500	ENSG00000257093.7			FALSE
cg05888027_BC21	0.165722	0.00219874	0.00155164	0.999957	chr4	187541531		OpenSea					FALSE
cg15453206_TC21	-0.173734	0.00197537	0.00155214	0.999957	chr3	24687826		OpenSea	TSS200;TSS200;TSS200	ENSG00000077092.20;ENSG00000077092.20;ENSG00000077092.20			FALSE
cg24849648_TC21	-0.077096	0.00197571	0.00155242	0.999957	chr7	121323965		OpenSea	TSS1500	ENSG00000002745.13			FALSE
cg15326116_TC21	0.0392452	0.00220164	0.00155381	0.999957	chr16	21212178		OpenSea	TSS1500;TSS1500;TSS1500	ENSG00000103310.11;ENSG00000103310.11;ENSG00000103310.11			FALSE
cg25122988_BC21	0.0846988	0.002206	0.00155706	0.999957	chr1	83793617		OpenSea					FALSE
cg15956245_BC11	-0.0404365	0.00198167	0.00155733	0.999957	chr11	4095843	chr11:4094459-4095259	Shore					FALSE
cg03870394_BC21	0.0646827	0.00220853	0.00155895	0.999957	chr2	186589379	chr2:186589672-186590622	Shore	TSS1500;TSS1500;TSS1500;TSS1500;TSS1500;TSS1500;TSS1500;TSS1500;TSS1500;TSS1500;TSS1500;TSS1500;TSS1500;TSS1500	ENSG00000138448.13;ENSG00000138448.13;ENSG00000138448.13;ENSG00000138448.13;ENSG00000138448.13;ENSG00000138448.13;ENSG00000138448.13;ENSG00000138448.13;ENSG00000138448.13;ENSG00000138448.13;ENSG00000138448.13;ENSG00000138448.13;ENSG00000138448.13;ENSG00000138448.13		Promoter_Associated	TRUE
cg00520850_TC21	-0.0852252	0.00198382	0.0015591	0.999957	chr1	31154209	chr1:31155253-31155646	Shore					FALSE
cg19776032_BC21	0.0120157	0.002211	0.00156079	0.999957	chr6	32853313	chr6:32853072-32854593	Island	exon_1;exon_1;exon_1;exon_1;exon_1;exon_1;TSS1500;TSS1500;TSS1500;TSS1500	TAP1;TAP1;TAP1;TAP1;TAP1;TAP1;ENSG00000240065.8;ENSG00000240065.8;ENSG00000168394.13;ENSG00000168394.13		Promoter_Associated	TRUE
cg03811433_BC21	0.0416654	0.00221563	0.00156425	0.999957	chr2	173077193	chr2:173075686-173076543	Shore			chr2:173077026-173077580		FALSE
cg25858172_TC21	0.0394914	0.0022158	0.00156438	0.999957	chr15	40875707	chr15:40873649-40874373	Shore	TSS1500	ENSG00000104140.7			FALSE
cg04626721_BC11	-0.0181625	0.00199095	0.00156498	0.999957	chr11	130143505		OpenSea	exon_19;exon_15;exon_16;exon_17;exon_18;exon_13;exon_17;exon_5;exon_2;3UTR;3UTR;3UTR;3UTR;3UTR;3UTR;3UTR	APLP2;APLP2;APLP2;APLP2;APLP2;APLP2;APLP2;APLP2;APLP2;APLP2;APLP2;APLP2;APLP2;APLP2;APLP2;APLP2			FALSE
cg14713026_TC21	-0.0626608	0.00199291	0.00156659	0.999957	chr1	39405174	chr1:39408346-39409567	Shelf					FALSE
cg23296408_BC21	0.0149402	0.00222134	0.00156852	0.999957	chr14	91114269		OpenSea	exon_1;exon_1;exon_1;exon_1;exon_1;exon_1;exon_1;exon_1;exon_1;exon_1;exon_1;5UTR;5UTR;5UTR;5UTR;5UTR;5UTR;5UTR;5UTR;5UTR;5UTR;5UTR;TSS200;TSS200;TSS200;TSS200;TSS200;TSS200;TSS200;TSS1500;TSS1500;TSS1500	DGLUCY;DGLUCY;DGLUCY;DGLUCY;DGLUCY;DGLUCY;DGLUCY;DGLUCY;DGLUCY;DGLUCY;DGLUCY;DGLUCY;DGLUCY;DGLUCY;DGLUCY;DGLUCY;DGLUCY;DGLUCY;DGLUCY;DGLUCY;DGLUCY;DGLUCY;ENSG00000133943.21;ENSG00000133943.21;ENSG00000133943.21;ENSG00000133943.21;ENSG00000133943.21;ENSG00000133943.21;ENSG00000133943.21;ENSG00000133943.21;ENSG00000133943.21;ENSG00000133943.21		Promoter_Associated	TRUE
cg26210343_TC21	-0.115315	0.00199668	0.0015697	0.999957	chr17	50395589	chr17:50397155-50397734	Shore	TSS1500	ENSG00000253102.1			FALSE
cg18127328_BC21	0.204052	0.0022239	0.00157043	0.999957	chr6	18632675		OpenSea					FALSE
cg15801964_TC21	-0.0318189	0.00199888	0.00157151	0.999957	chr17	3532742	chr17:3532659-3532870;chr17:3535547-3535752	Island	exon_2;exon_8;exon_7;exon_8;exon_9;exon_10;exon_8;3UTR;3UTR	TRPV3;TRPV3;TRPV3;TRPV3;TRPV3;TRPV3;TRPV3;TRPV3;TRPV3			FALSE
cg24152730_BC21	0.0707561	0.00223157	0.00157616	0.999957	chr14	49796318		OpenSea	exon_4;exon_20;TSS200	NEMF;NEMF;ENSG00000165525.18			FALSE
cg16720242_BC21	-0.0539161	0.00200731	0.00157846	0.999957	chr1	45730466		OpenSea					FALSE
cg01368075_BC21	-0.12851	0.00200847	0.00157942	0.999957	chr3	128805059		OpenSea					FALSE
cg21102121_TC11	0.193896	0.00223647	0.00157982	0.999957	chr19	53898041	chr19:53898450-53899218	Shore	exon_10;exon_10;exon_10;exon_10;exon_10;exon_2	PRKCG;PRKCG;PRKCG;PRKCG;PRKCG;PRKCG			FALSE
cg13856212_TC21	0.0779158	0.00223704	0.00158025	0.999957	chr1	232151371		OpenSea					FALSE
cg23047920_BC21	0.0218503	0.00223758	0.00158065	0.999957	chr14	90398637	chr14:90396699-90398559	Shore	exon_2;exon_1;TSS1500;TSS1500	CALM1;CALM1;ENSG00000198668.14;ENSG00000198668.14		Promoter_Associated	TRUE
cg00632361_TC21	-0.326345	0.00201179	0.00158215	0.999957	chr1	39776643		OpenSea					FALSE
cg06893225_TC11	0.0344067	0.00224072	0.001583	0.999957	chr1	23980373	chr1:23979873-23980527	Island	exon_1;TSS200;TSS200;TSS200;TSS200;TSS200;TSS200;TSS200;TSS200;TSS200;TSS200;TSS1500	SRSF10;ENSG00000188529.15;ENSG00000188529.15;ENSG00000188529.15;ENSG00000188529.15;ENSG00000188529.15;ENSG00000188529.15;ENSG00000188529.15;ENSG00000188529.15;ENSG00000188529.15;ENSG00000188529.15;ENSG00000188529.15		Promoter_Associated	TRUE
cg00296565_TC21	0.0685803	0.0022434	0.001585	0.999957	chr1	42041023		OpenSea	exon_1	HNRNPFP1			FALSE
cg03441422_BC21	0.137701	0.0022436	0.00158515	0.999957	chr4	170744359		OpenSea	TSS1500	ENSG00000250968.1			FALSE
cg25512033_BC21	-0.116312	0.00201544	0.00158516	0.999957	chr20	61187735		OpenSea					FALSE
cg19391276_BC11	0.0147253	0.00224412	0.00158554	0.999957	chr6	99607909	chr6:99603142-99604096;chr6:99606810-99607112;chr6:99607765-99607990	Island					FALSE
cg11136562_TC21	0.108178	0.00224676	0.00158751	0.999957	chr5	141681718	chr5:141681847-141682219	Shore	TSS1500;TSS1500;TSS1500	ENSG00000120318.16;ENSG00000120318.16;ENSG00000289478.1		Unclassified	TRUE
cg20666307_BC21	0.120365	0.00224747	0.00158804	0.999957	chr5	145111429		OpenSea					FALSE
cg06404019_BC21	0.0602441	0.00225018	0.00159007	0.999957	chr1	24575975		OpenSea					FALSE
cg01820954_TC21	-0.102884	0.00202294	0.00159135	0.999957	chr6	37127112		OpenSea					FALSE
cg23058721_BC21	-0.0458467	0.00203238	0.00159914	0.999957	chr17	80409086		OpenSea					FALSE
cg12441203_BC21	-0.112685	0.00203358	0.00160012	0.999957	chr8	41264379		OpenSea	exon_3;exon_3;3UTR;3UTR	SFRP1;SFRP1;SFRP1;SFRP1			FALSE
cg20341251_BC21	-0.127427	0.00203391	0.00160039	0.999957	chr12	1644990	chr12:1645831-1646077	Shore	exon_1	WNT5B			FALSE
cg11724564_BC21	0.0711575	0.00226404	0.00160043	0.999957	chr7	128892724	chr7:128890575-128891302	Shore	exon_15;exon_15;exon_15;exon_8;exon_15	KCP;KCP;KCP;KCP;KCP			FALSE
cg26037631_BC21	-0.0267828	0.00203559	0.00160178	0.999957	chr22	18022945	chr22:18023653-18024646	Shore					FALSE
cg11918005_BC21	-0.0352371	0.00203641	0.00160246	0.999957	chr19	1014639	chr19:1007552-1011984;chr19:1014274-1014579	Shore	TSS1500;TSS1500;TSS1500;TSS1500	ENSG00000182087.14;ENSG00000182087.14;ENSG00000182087.14;ENSG00000182087.14			FALSE
cg22720192_BC21	0.110621	0.00226872	0.00160393	0.999957	chr6	20059030		OpenSea					FALSE
cg08545955_TC21	0.13305	0.00226893	0.00160408	0.999957	chr19	6141362		OpenSea					FALSE
cg00522581_TC11	-0.0240664	0.00204083	0.0016061	0.999957	chr3	129606833	chr3:129605072-129607181	Island	TSS200	ENSG00000004399.13		Promoter_Associated	TRUE
cg21538427_BC21	-0.176383	0.00204301	0.00160791	0.999957	chr16	56368640		OpenSea	TSS1500	ENSG00000159461.15			FALSE
cg06303121_BC21	0.0693104	0.00227431	0.00160811	0.999957	chr4	16124213		OpenSea			chr4:16123681-16124291		FALSE
cg17895467_TC21	-0.100781	0.0020442	0.00160889	0.999957	chr17	49218156	chr17:49219607-49219952	Shore	TSS1500	ENSG00000108798.9	chr17:49218130-49218425	Unclassified	TRUE
cg00795248_TC21	-0.044445	0.00204696	0.00161116	0.999957	chr1	197919175	chr1:197915930-197916259;chr1:197917958-197918661;chr1:197921348-197921694	Shore					FALSE
cg25522285_TC21	0.0705818	0.00228102	0.00161313	0.999957	chr4	88352164		OpenSea					FALSE
cg13620240_TC21	0.0504319	0.00228303	0.00161463	0.999957	chr9	123536502		OpenSea					FALSE
cg11556929_TC11	-0.0072758	0.00205177	0.00161513	0.999957	chr2	239401911	chr2:239400083-239402225	Island	exon_1;exon_1;exon_1;TSS1500;TSS1500;TSS1500	HDAC4-AS1;HDAC4-AS1;HDAC4-AS1;ENSG00000068024.18;ENSG00000068024.18;ENSG00000068024.18		Promoter_Associated	TRUE
cg07184639_TC21	0.0507725	0.00228477	0.00161593	0.999957	chr2	23347185		OpenSea	TSS1500	ENSG00000233714.1			FALSE
cg23168717_TC21	0.0179633	0.00228692	0.00161754	0.999957	chr18	3155986		OpenSea					FALSE
cg17374802_TC21	-0.0587403	0.00205506	0.00161785	0.999957	chr17	58193467	chr17:58197031-58197237	Shelf	exon_3	EPX			FALSE
cg17947170_TC21	0.0780294	0.0022895	0.00161947	0.999957	chr15	43332041	chr15:43329632-43330755	Shore	exon_2;TSS1500;TSS1500	ADAL;ENSG00000168806.8;ENSG00000168806.8			FALSE
cg19857457_TC21	0.0899296	0.00229165	0.00162108	0.999957	chr18	49492577	chr18:49492064-49492578	Island	TSS1500;TSS200;TSS1500;TSS200;TSS200;TSS200;TSS1500;TSS200;TSS200;TSS1500;TSS200;TSS200;TSS200;TSS1500;TSS200;TSS200;TSS200;TSS1500;TSS200;TSS200;TSS200;TSS200;TSS200;TSS1500;TSS1500	ENSG00000215472.10;ENSG00000215472.10;ENSG00000215472.10;ENSG00000265681.8;ENSG00000265681.8;ENSG00000265681.8;ENSG00000265681.8;ENSG00000265681.8;ENSG00000265681.8;ENSG00000265681.8;ENSG00000265681.8;ENSG00000265681.8;ENSG00000265681.8;ENSG00000265681.8;ENSG00000265681.8;ENSG00000265681.8;ENSG00000265681.8;ENSG00000265681.8;ENSG00000265681.8;ENSG00000265681.8;ENSG00000265681.8;ENSG00000265681.8;…		Promoter_Associated_Cell_type_specific	TRUE
cg12579612_TC11	-0.0121009	0.00206252	0.001624	0.999957	chr19	5659404		OpenSea					FALSE
cg05846057_TC21	-0.0554419	0.00206266	0.00162412	0.999957	chr1	65252419	chr1:65254291-65254909	Shore					FALSE
cg19526455_BC21	0.174739	0.00229724	0.00162526	0.999957	chr17	39631609	chr17:39627061-39627666	Shelf	TSS1500	ENSG00000131771.14			FALSE
cg05756745_TC11	0.0920062	0.00229833	0.00162607	0.999957	chr16	87668247	chr16:87668887-87669098	Shore					FALSE
cg11891887_TC21	0.105584	0.00230077	0.0016279	0.999957	chr1	200354419		OpenSea			chr1:200354222-200354495		FALSE
cg10194582_BC21	-0.0691533	0.00206956	0.00162982	0.999957	chr6	143746531		OpenSea					FALSE
cg00429350_TC21	-0.0371195	0.00207001	0.00163019	0.999957	chr1	201727403		OpenSea					FALSE
cg03849780_BC11	-0.0714934	0.00207063	0.0016307	0.999957	chr1	7755977		OpenSea				Unclassified_Cell_type_specific	TRUE
cg10249430_BC11	-0.00954348	0.00207102	0.00163102	0.999957	chr3	134374697	chr3:134373415-134374899	Island	TSS1500;TSS1500;TSS1500;TSS200;TSS200;TSS1500;TSS1500;TSS1500;TSS1500	ENSG00000114019.15;ENSG00000114019.15;ENSG00000114019.15;ENSG00000114019.15;ENSG00000114019.15;ENSG00000114019.15;ENSG00000114019.15;ENSG00000114019.15;ENSG00000114019.15		Unclassified_Cell_type_specific	TRUE
cg11580663_BC11	0.0120026	0.00230593	0.00163176	0.999957	chr1	154272283	chr1:154272234-154272813	Island	TSS200;TSS1500;TSS1500;TSS1500;TSS1500;TSS1500;TSS1500;TSS1500;TSS1500;TSS1500;TSS1500;TSS1500;TSS1500;TSS1500;TSS1500;TSS1500;TSS1500;TSS1500;TSS1500;TSS1500;TSS1500;TSS1500	ENSG00000143575.16;ENSG00000143575.16;ENSG00000143575.16;ENSG00000143575.16;ENSG00000143575.16;ENSG00000143575.16;ENSG00000143575.16;ENSG00000143575.16;ENSG00000143575.16;ENSG00000143575.16;ENSG00000143575.16;ENSG00000143575.16;ENSG00000143575.16;ENSG00000143575.16;ENSG00000143575.16;ENSG00000143575.16;ENSG00000143575.16;ENSG00000143575.16;ENSG00000143575.16;ENSG00000143575.16;ENSG00000143575.16;…		Promoter_Associated	TRUE
cg12220812_TC21	-0.0512795	0.00207294	0.0016326	0.999957	chr8	38790559	chr8:38786955-38788242	Shelf			chr8:38790480-38790825		FALSE
cg01322142_BC21	-0.13495	0.00207399	0.00163347	0.999957	chr4	792930	chr4:795037-795950	Shelf	TSS1500	ENSG00000168993.15		Unclassified	TRUE
cg03052915_TC21	0.125095	0.00230834	0.00163357	0.999957	chr3	100339092	chr3:100334604-100335109	Shelf	exon_2;exon_2;exon_2;exon_2;exon_2;exon_2;3UTR;TSS200	NIT2;NIT2;NIT2;NIT2;NIT2;NIT2;NIT2;ENSG00000114021.12			FALSE
cg25897440_BC11	-0.00567383	0.00207437	0.00163379	0.999957	chr21	46459080	chr21:46458157-46459663	Island	exon_1;exon_1;exon_1;exon_1;exon_1;exon_1;5UTR;5UTR;5UTR;5UTR;5UTR;5UTR;TSS1500	DIP2A;DIP2A;DIP2A;DIP2A;DIP2A;DIP2A;DIP2A;DIP2A;DIP2A;DIP2A;DIP2A;DIP2A;ENSG00000289421.1		Promoter_Associated	TRUE
cg20368463_TC21	0.111464	0.00230946	0.00163441	0.999957	chr18	79913604	chr18:79915198-79915485;chr18:79915990-79916322	Shore					FALSE
cg04120413_TC21	-0.064754	0.00207843	0.00163714	0.999957	chr3	149086956	chr3:149086117-149086770	Shore	TSS1500;TSS1500;TSS1500;TSS1500;TSS1500	ENSG00000071794.16;ENSG00000071794.16;ENSG00000071794.16;ENSG00000071794.16;ENSG00000071794.16		Unclassified	TRUE
cg12867439_BC11	-0.00615706	0.00207872	0.00163738	0.999957	chr8	95133565	chr8:95133532-95134501	Island	TSS200;TSS200;TSS1500;TSS1500;TSS1500;TSS1500	ENSG00000175895.5;ENSG00000175895.5;ENSG00000175895.5;ENSG00000175895.5;ENSG00000175895.5;ENSG00000175895.5		Promoter_Associated	TRUE
cg11372447_TC21	0.0890711	0.00231406	0.00163785	0.999957	chr6	137355006		OpenSea					FALSE
cg07015511_BC21	0.079165	0.0023176	0.0016405	0.999957	chr17	78501786	chr17:78502725-78502993	Shore	exon_34;exon_2	DNAH17;DNAH17-AS1			FALSE
cg14345069_TC21	0.00770375	0.002318	0.0016408	0.999957	chr4	185426145	chr4:185425640-185426417	Island	TSS200;TSS200;TSS200;TSS1500;TSS200;TSS200;TSS200;TSS200;TSS200	ENSG00000109775.11;ENSG00000109775.11;ENSG00000109775.11;ENSG00000109775.11;ENSG00000109775.11;ENSG00000205129.9;ENSG00000205129.9;ENSG00000205129.9;ENSG00000205129.9		Promoter_Associated	TRUE
cg18262615_BC21	0.0644267	0.00231819	0.00164094	0.999957	chr3	183508101		OpenSea	exon_3;exon_3;exon_3	KLHL6;KLHL6;KLHL6			FALSE
cg00721193_BC21	0.0359389	0.00231894	0.0016415	0.999957	chr22	19978850	chr22:19979756-19980285	Shore					FALSE
cg10858215_TC11	0.0553111	0.00231918	0.00164168	0.999957	chr2	176139876	chr2:176136493-176137055;chr2:176140636-176140938	Shore					FALSE
cg16316472_BC11	0.0632174	0.00232149	0.00164341	0.999957	chr4	77076029	chr4:77075268-77076418	Island	exon_1;5UTR;TSS200;TSS1500;TSS1500;TSS1500;TSS1500;TSS200	CCNI;CCNI;ENSG00000118816.11;ENSG00000118816.11;ENSG00000118816.11;ENSG00000118816.11;ENSG00000118816.11;ENSG00000289496.2		Promoter_Associated	TRUE
cg05538358_TC21	-0.0411343	0.00208825	0.00164525	0.999957	chr6	33441611		OpenSea	exon_14;exon_13;exon_13;exon_13;exon_13;exon_13;exon_13;exon_13;exon_11;exon_11;exon_11;3UTR;TSS200	SYNGAP1;SYNGAP1;SYNGAP1;SYNGAP1;SYNGAP1;SYNGAP1;SYNGAP1;SYNGAP1;SYNGAP1;SYNGAP1;SYNGAP1;SYNGAP1;ENSG00000197283.18			FALSE
cg20359756_TC21	-0.154204	0.00208838	0.00164535	0.999957	chr20	46714277		OpenSea	TSS200	ENSG00000197496.6			FALSE
cg20572537_TC11	-0.117514	0.00208854	0.00164549	0.999957	chr7	2518081	chr7:2518737-2520333	Shore	TSS1500	ENSG00000106003.14			FALSE
cg22730994_BC21	-0.0281269	0.00209201	0.00164835	0.999957	chr16	66562995	chr16:66566121-66566665	Shelf	TSS200	ENSG00000254788.7			FALSE
cg01442550_BC21	0.1821	0.00232829	0.00164851	0.999957	chr6	168514760	chr6:168517916-168518222	Shelf					FALSE
cg23830540_BC21	-0.100699	0.00209276	0.00164898	0.999957	chr4	5844137		OpenSea					FALSE
cg08688592_BC21	0.110917	0.00232898	0.00164902	0.999957	chr15	67888337	chr15:67884783-67885077	Shelf					FALSE
cg19630520_TC11	0.0232045	0.00232908	0.0016491	0.999957	chr14	23042720		OpenSea	exon_1	PSMB11			FALSE
cg15819163_TC21	0.105958	0.00233171	0.00165106	0.999957	chr10	131943745		OpenSea				Gene_Associated_Cell_type_specific	TRUE
cg14717751_BC21	0.145604	0.00233223	0.00165146	0.999957	chr11	77043319	chr11:77039648-77040731;chr11:77046005-77046236	Shelf					FALSE
cg14945214_TC21	-0.0434763	0.00209591	0.00165158	0.999957	chr12	120111059		OpenSea				Promoter_Associated	TRUE
cg09718634_BC21	0.0476206	0.00233351	0.00165241	0.999957	chr1	156186343		OpenSea					FALSE
cg25460299_TC21	-0.0581433	0.0020978	0.00165314	0.999957	chr3	16407075		OpenSea					FALSE
cg05421580_BC21	-0.14642	0.00209797	0.00165328	0.999957	chr17	1773628		OpenSea					FALSE
cg21737226_TC21	0.122431	0.0023366	0.00165472	0.999957	chr8	52414108		OpenSea				Unclassified_Cell_type_specific	TRUE
cg08362313_TC11	-0.00733059	0.00209981	0.0016548	0.999957	chr5	34007840	chr5:34007691-34008228	Island	exon_1;exon_1;exon_1;exon_1;exon_1;exon_1;exon_1;exon_1;exon_1	AMACR;AMACR;AMACR;AMACR;AMACR;AMACR;ENSG00000289791;ENSG00000289791;ENSG00000289791		Promoter_Associated	TRUE
cg09384111_TC11	-0.00904731	0.00210058	0.00165543	0.999957	chr9	4299931	chr9:4297817-4300182	Island	exon_1;exon_1;5UTR;5UTR;TSS1500;TSS200;TSS1500;TSS1500;TSS200;TSS200	GLIS3;GLIS3;GLIS3;GLIS3;ENSG00000107249.24;ENSG00000107249.24;ENSG00000107249.24;ENSG00000107249.24;ENSG00000107249.24;ENSG00000107249.24			FALSE
cg12404940_TC21	0.135244	0.00233816	0.0016559	0.999957	chr8	33806108		OpenSea					FALSE
cg06890522_BC21	-0.121467	0.00210465	0.0016588	0.999957	chr17	7014074	chr17:7012505-7012882;chr17:7014250-7015220	Shore	TSS1500;TSS1500;TSS1500;TSS1500;TSS1500;TSS1500	ENSG00000258315.5;ENSG00000258315.5;ENSG00000258315.5;ENSG00000258315.5;ENSG00000258315.5;ENSG00000258315.5		Promoter_Associated	TRUE
cg14492373_TC21	-0.0562967	0.00210557	0.00165956	0.999957	chr9	137063950		OpenSea	exon_6;exon_1;3UTR	SAPCD2;ENSG00000231864;SAPCD2		Unclassified	TRUE
cg04384014_BC21	-0.0282481	0.00210786	0.00166145	0.999957	chr2	239241103		OpenSea					FALSE
cg10949319_BC11	-0.0218581	0.00210787	0.00166146	0.999957	chr10	103394307	chr10:103396063-103396727	Shore	exon_3;exon_2;exon_1;5UTR;5UTR	ATP5MK;ATP5MK;MIR1307;ATP5MK;ATP5MK			FALSE
cg03363633_TC21	0.100723	0.00234611	0.00166185	0.999957	chr19	35909415		OpenSea	TSS1500;TSS1500;TSS1500;TSS1500;TSS1500;TSS1500;TSS1500;TSS1500;TSS1500	ENSG00000011600.12;ENSG00000011600.12;ENSG00000011600.12;ENSG00000011600.12;ENSG00000011600.12;ENSG00000011600.12;ENSG00000011600.12;ENSG00000011600.12;ENSG00000011600.12	chr19:35909393-35909740	Promoter_Associated_Cell_type_specific	TRUE
cg19471856_BC21	-0.077446	0.00210872	0.00166216	0.999957	chr7	108095239		OpenSea	exon_12;exon_12;exon_12;exon_12	LAMB4;LAMB4;LAMB4;LAMB4			FALSE
cg20317090_BC21	0.0460385	0.0023493	0.00166424	0.999957	chr15	43134142	chr15:43133704-43134065	Shore	TSS200	ENSG00000137842.7		Promoter_Associated	TRUE
cg19338197_BC11	0.0110687	0.00235125	0.0016657	0.999957	chr11	33295469		OpenSea					FALSE
cg13380502_BC21	-0.16974	0.00211361	0.0016662	0.999957	chr1	27391717	chr1:27392388-27392845	Shore	TSS1500	ENSG00000181773.7		Promoter_Associated	TRUE
cg00818175_TC21	-0.125798	0.00211362	0.00166621	0.999957	chr9	122053348		OpenSea			chr9:122053196-122053366		FALSE
cg22480427_BC21	0.0543366	0.00235323	0.00166719	0.999957	chr3	134003735		OpenSea					FALSE
cg12449571_TC21	0.2448	0.00235415	0.00166788	0.999957	chr8	43253522		OpenSea	TSS1500	ENSG00000253186.2			FALSE
cg03782694_BC21	-0.12236	0.00211585	0.00166805	0.999957	chr15	50182024	chr15:50182125-50182989	Shore	TSS200;TSS1500	ENSG00000140284.11;ENSG00000140284.11		Promoter_Associated_Cell_type_specific	TRUE
cg25835233_BC21	0.0768132	0.00235583	0.00166913	0.999957	chr21	36659189		OpenSea					FALSE
cg23147615_BC21	0.144675	0.00235758	0.00167045	0.999957	chr18	667799		OpenSea			chr18:667633-668016		FALSE
cg16699540_TC21	-0.137747	0.00211935	0.00167095	0.999957	chr3	157075922		OpenSea					FALSE
cg00491958_BC21	-0.0200221	0.002121	0.00167231	0.999957	chr11	68050519		OpenSea	exon_19;exon_15;exon_19;exon_14;exon_14;exon_12;exon_10;exon_7;exon_7;exon_6;TSS1500	TCIRG1;TCIRG1;TCIRG1;TCIRG1;TCIRG1;TCIRG1;TCIRG1;TCIRG1;TCIRG1;TCIRG1;ENSG00000255031.5		Gene_Associated_Cell_type_specific	TRUE
cg22644557_TC21	-0.0828528	0.00212114	0.00167242	0.999957	chr8	92017871		OpenSea	TSS1500;TSS1500	ENSG00000079102.16;ENSG00000079102.16			FALSE
cg22567327_BC21	-0.053762	0.00212209	0.00167321	0.999957	chr17	43429604		OpenSea					FALSE
cg23612335_TC21	0.00980333	0.00236233	0.001674	0.999957	chr18	58581538		OpenSea	TSS1500;TSS1500	ENSG00000198796.7;ENSG00000198796.7	chr18:58581496-58581604		FALSE
cg11698827_TC21	-0.0348018	0.0021234	0.00167429	0.999957	chr19	45097282	chr19:45092828-45093613	Shelf				Unclassified_Cell_type_specific	TRUE
cg23397741_TC21	0.0377967	0.00236481	0.00167587	0.999957	chr17	36658157	chr17:36657841-36658165	Island				Unclassified_Cell_type_specific	TRUE
cg07584061_TC21	0.0597987	0.0023654	0.00167631	0.999957	chr12	60308849		OpenSea					FALSE
cg26807632_BC21	-0.0883316	0.00212616	0.00167657	0.999957	chr4	140935489		OpenSea					FALSE
cg14831452_BC21	0.0169027	0.00236978	0.00167959	0.999957	chr3	178805875		OpenSea	TSS1500;TSS1500	ENSG00000197584.13;ENSG00000197584.13			FALSE
cg05796981_BC21	-0.0241334	0.00212991	0.00167967	0.999957	chr1	228088033		OpenSea	TSS200	ENSG00000143761.17		Promoter_Associated	TRUE
cg18226049_TC21	-0.0358402	0.00213077	0.00168039	0.999957	chr11	2403561	chr11:2399810-2401244	Shelf	exon_4;exon_6;exon_3;exon_2;exon_2;TSS1500	TSSC4;TSSC4;TSSC4;TSSC4;TSSC4;ENSG00000230483.1			FALSE
cg16324934_TC21	0.0424784	0.00237503	0.00168353	0.999957	chr14	85622236		OpenSea	exon_2;exon_2;exon_2;exon_2;TSS1500	FLRT2;FLRT2;FLRT2;FLRT2;ENSG00000185070.12			FALSE
cg09251160_TC21	-0.225842	0.00213459	0.00168355	0.999957	chr1	161225373		OpenSea	TSS1500;TSS1500;TSS1500;TSS1500;TSS1500;TSS1500;TSS1500	ENSG00000158882.15;ENSG00000158882.15;ENSG00000158882.15;ENSG00000158882.15;ENSG00000158882.15;ENSG00000158882.15;ENSG00000158882.15		Promoter_Associated	TRUE
cg17535647_BC11	-0.0213478	0.00213497	0.00168386	0.999957	chr12	20368529	chr12:20369228-20370188	Shore	TSS200	ENSG00000172572.7		Unclassified_Cell_type_specific	TRUE
cg24395958_TC21	-0.034054	0.00213505	0.00168392	0.999957	chr10	23118906		OpenSea	TSS1500	ENSG00000148450.13			FALSE
cg06686306_BC11	-0.00653186	0.0021352	0.00168404	0.999957	chr3	184185994	chr3:184185598-184186707	Island	TSS200;TSS200;TSS200;TSS200;TSS200;TSS200;TSS200;TSS1500;TSS1500;TSS1500	ENSG00000161204.12;ENSG00000161204.12;ENSG00000161204.12;ENSG00000161204.12;ENSG00000161204.12;ENSG00000161204.12;ENSG00000161204.12;ENSG00000161204.12;ENSG00000161204.12;ENSG00000161204.12		Promoter_Associated	TRUE
cg10312572_BC21	0.0208596	0.00237727	0.00168521	0.999957	chr5	175797588	chr5:175796606-175797676	Island				Unclassified_Cell_type_specific	TRUE
cg15659420_BC21	-0.110484	0.00213709	0.00168562	0.999957	chr11	20013433		OpenSea					FALSE
cg13900420_TC21	-0.215205	0.00213917	0.00168733	0.999957	chr12	120326297		OpenSea	TSS1500	ENSG00000170890.14			FALSE
cg17198360_TC11	-0.030822	0.0021404	0.00168835	0.999957	chr6	30033020		OpenSea					FALSE
cg19314059_BC21	0.0341925	0.00238174	0.00168856	0.999957	chr11	6557984		OpenSea	exon_25;exon_5;TSS200;TSS200;TSS1500	DNHD1;DNHD1;ENSG00000179532.13;ENSG00000179532.13;ENSG00000179532.13			FALSE
cg07235577_BC21	0.18149	0.00238299	0.0016895	0.999957	chr8	50126911		OpenSea					FALSE
cg05583129_BC21	0.0943568	0.00238484	0.00169088	0.999957	chr18	65938459		OpenSea					FALSE
cg12251527_TC21	0.0678524	0.00238524	0.00169119	0.999957	chr4	175748041		OpenSea					FALSE
cg17185404_TC21	0.112708	0.00238571	0.00169154	0.999957	chr3	70325089		OpenSea					FALSE
cg24466442_TC21	-0.0837904	0.00214542	0.0016925	0.999957	chr3	60322831		OpenSea			chr3:60322664-60322976		FALSE
cg18059802_BC21	0.025189	0.00238836	0.00169353	0.999957	chr12	50953275		OpenSea	TSS1500	ENSG00000214511.4		Unclassified_Cell_type_specific	TRUE
cg08477332_TC21	-0.339278	0.00214909	0.00169553	0.999957	chr1	153617767		OpenSea	TSS1500;TSS1500;TSS1500;TSS1500	ENSG00000189334.9;ENSG00000189334.9;ENSG00000189334.9;ENSG00000189334.9		Unclassified	TRUE
cg16956201_BC21	0.130283	0.00239199	0.00169625	0.999957	chr1	7218728		OpenSea	TSS1500	ENSG00000207056.1			FALSE
cg12883095_BC21	0.112944	0.00239221	0.00169641	0.999957	chr15	62444388		OpenSea					FALSE
cg25173532_BC21	0.120673	0.00239387	0.00169766	0.999957	chr20	33685051	chr20:33685751-33686699	Shore				Promoter_Associated	TRUE
cg20303441_BC11	0.100465	0.00239392	0.0016977	0.999957	chr2	25273521	chr2:25276894-25277560	Shelf	exon_2	DNMT3A	chr2:25273433-25273673	Promoter_Associated	TRUE
cg09404071_TC21	0.0451178	0.00239604	0.00169928	0.999957	chr7	74792454	chr7:74787989-74789285	Shelf					FALSE
cg25006128_TC11	-0.0124271	0.00215709	0.00170215	0.999957	chr9	129803135	chr9:129803037-129803754	Island	TSS200;TSS200;TSS200;TSS1500	ENSG00000136816.16;ENSG00000136816.16;ENSG00000136816.16;ENSG00000136816.16		Promoter_Associated	TRUE
cg05832390_TC21	-0.125273	0.0021573	0.00170232	0.999957	chr17	6798582		OpenSea	exon_8;3UTR	TEKT1;TEKT1			FALSE
cg02436384_BC21	-0.0406249	0.0021587	0.00170349	0.999957	chr14	22540473		OpenSea					FALSE
cg26268896_TC21	0.17935	0.00240396	0.00170523	0.999957	chr4	187022090		OpenSea					FALSE
cg25144696_TC11	-0.00919832	0.00216196	0.00170618	0.999957	chr12	77065811	chr12:77065167-77066162	Island	TSS1500;TSS1500;TSS1500;TSS1500;TSS1500	ENSG00000165891.16;ENSG00000165891.16;ENSG00000165891.16;ENSG00000165891.16;ENSG00000165891.16		Promoter_Associated	TRUE
cg05466207_TC21	-0.149874	0.00216197	0.00170619	0.999957	chr9	126093990		OpenSea					FALSE
cg15835232_BC21	0.0249662	0.00240528	0.00170621	0.999957	chr17	55265714	chr17:55264837-55265673	Shore	TSS200;TSS1500	ENSG00000108924.14;ENSG00000108924.14		Unclassified	TRUE
cg09229210_BC21	-0.0629568	0.0021623	0.00170646	0.999957	chr3	98806088		OpenSea	TSS1500	ENSG00000206712.1			FALSE
cg05233237_BC21	-0.0372873	0.00216413	0.00170798	0.999957	chr11	57625808		OpenSea					FALSE
cg09242823_TC11	0.0497838	0.00241	0.00170976	0.999957	chr4	3689218		OpenSea					FALSE
cg09296510_BC21	-0.0274671	0.00216654	0.00170997	0.999957	chr6	25370583		OpenSea					FALSE
cg15849077_BC21	0.0532573	0.00241086	0.0017104	0.999957	chr6	47794500		OpenSea	TSS1500	ENSG00000124818.15			FALSE
cg00817464_TC21	-0.0984547	0.00216773	0.00171095	0.999957	chr10	109903118		OpenSea				Gene_Associated_Cell_type_specific	TRUE
cg08884368_BC11	0.00723333	0.00241176	0.00171108	0.999957	chr17	51166793	chr17:51166259-51167286	Island	exon_1;5UTR;TSS1500	NME2;NME2;ENSG00000243678.12		Promoter_Associated	TRUE
cg14227996_TC11	0.0103778	0.00241205	0.0017113	0.999957	chr4	17614609	chr4:17614552-17614883	Island	TSS200;TSS200;TSS200;TSS200;TSS200	ENSG00000249502.3;ENSG00000249502.3;ENSG00000118579.13;ENSG00000118579.13;ENSG00000118579.13		Promoter_Associated	TRUE
cg14438399_TC21	0.0112421	0.00241209	0.00171132	0.999957	chr17	28726129	chr17:28725923-28727066;chr17:28728169-28729038	Island	exon_1;5UTR;TSS1500;TSS1500	TLCD1;TLCD1;ENSG00000160606.11;ENSG00000267729.1		Promoter_Associated	TRUE
cg08556518_BC21	-0.052692	0.00216948	0.0017124	0.999957	chr5	134920489		OpenSea					FALSE
cg22002034_TC21	0.121593	0.00241553	0.00171391	0.999957	chr1	119007325	chr1:119006521-119008697	Island					FALSE
cg12104707_BC21	-0.0143188	0.00217146	0.00171404	0.999957	chr19	9538794	chr19:9538258-9538734	Shore	exon_1;exon_1;exon_1;exon_1;TSS200;TSS1500;TSS1500;TSS200	ZNF426-DT;ZNF426-DT;ZNF426-DT;ZNF426-DT;ENSG00000130818.12;ENSG00000130818.12;ENSG00000130818.12;ENSG00000130818.12		Promoter_Associated	TRUE
cg27174263_TC11	0.00678192	0.00241798	0.00171575	0.999957	chr8	94719708	chr8:94719570-94720060	Island	exon_1;5UTR;TSS200;TSS200	DPY19L4;DPY19L4;ENSG00000156162.16;ENSG00000156162.16		Promoter_Associated	TRUE
cg21601843_BC21	-0.0499042	0.002175	0.00171697	0.999957	chr17	43387350		OpenSea	exon_2;exon_1;TSS1500	LINC00910;RNU2-4P;ENSG00000288909.2			FALSE
cg14419781_BC21	0.0776608	0.00241996	0.00171724	0.999957	chr6	31868181		OpenSea					FALSE
cg19486955_BC21	-0.0318833	0.00217567	0.00171752	0.999957	chr12	96280433		OpenSea	exon_16;3UTR	CDK17;CDK17			FALSE
cg07236939_TC21	-0.0468539	0.00217607	0.00171786	0.999957	chr6	110401050	chr6:110399856-110400427	Shore					FALSE
cg27632435_BC11	0.0196036	0.00242191	0.0017187	0.999957	chr12	49265038	chr12:49264463-49265392	Island	TSS200;TSS200;TSS1500	ENSG00000167553.17;ENSG00000167553.17;ENSG00000258101.2		Promoter_Associated	TRUE
cg08048963_BC21	-0.0419838	0.00217941	0.00172062	0.999957	chr6	31968750	chr6:31971953-31972782	Shelf	exon_25;exon_24;exon_24;exon_25;exon_25;exon_25;exon_23;exon_24;exon_22;exon_25;exon_24;exon_24;exon_25;exon_24;exon_22;exon_25;exon_21;exon_25;exon_21;exon_24;exon_6;exon_2;3UTR;3UTR;3UTR;3UTR;3UTR;3UTR	SKIV2L;SKIV2L;SKIV2L;SKIV2L;SKIV2L;SKIV2L;SKIV2L;SKIV2L;SKIV2L;SKIV2L;SKIV2L;SKIV2L;SKIV2L;SKIV2L;SKIV2L;SKIV2L;SKIV2L;SKIV2L;SKIV2L;SKIV2L;SKIV2L;SKIV2L;SKIV2L;SKIV2L;SKIV2L;SKIV2L;SKIV2L;SKIV2L			FALSE
cg18022769_BC21	0.0844559	0.0024256	0.00172147	0.999957	chr10	25593079		OpenSea	TSS1500	ENSG00000151025.11			FALSE
cg20994043_TC21	-0.0283476	0.00218345	0.00172397	0.999957	chr16	2171190		OpenSea					FALSE
cg16712736_BC21	-0.0350917	0.00218399	0.00172441	0.999957	chr2	241498256		OpenSea	exon_9;exon_8;exon_8;exon_9;exon_8;exon_8;exon_4;exon_8;exon_3;exon_1;exon_1;TSS200	STK25;STK25;STK25;STK25;STK25;STK25;STK25;STK25;STK25;STK25;STK25;ENSG00000115694.15			FALSE
cg16811108_BC21	0.169923	0.00243143	0.00172585	0.999957	chr17	8002522	chr17:8002609-8004127;chr17:8006391-8006723	Shore	TSS200	ENSG00000132518.7		Unclassified_Cell_type_specific	TRUE
cg24897758_BC21	0.0287004	0.00244032	0.00173252	0.999957	chr12	115950836		OpenSea					FALSE
cg21826946_BC11	-0.00846754	0.00219385	0.00173258	0.999957	chr3	170037960	chr3:170037806-170039059	Island	TSS200;TSS200;TSS1500;TSS1500;TSS1500	ENSG00000173890.17;ENSG00000173890.17;ENSG00000173890.17;ENSG00000173890.17;ENSG00000173890.17		Promoter_Associated	TRUE
cg15177618_BC21	-0.031164	0.00219427	0.00173292	0.999957	chr20	50054216		OpenSea					FALSE
cg15632808_BC11	0.0113746	0.00244135	0.0017333	0.999957	chr17	57256113	chr17:57255707-57257065	Island	TSS1500;TSS1500;TSS1500;TSS1500;TSS1500;TSS1500;TSS1500;TSS1500;TSS1500;TSS1500;TSS1500;TSS1500;TSS1500;TSS1500	ENSG00000286732.1;ENSG00000153944.12;ENSG00000153944.12;ENSG00000153944.12;ENSG00000153944.12;ENSG00000153944.12;ENSG00000153944.12;ENSG00000153944.12;ENSG00000153944.12;ENSG00000153944.12;ENSG00000153944.12;ENSG00000153944.12;ENSG00000153944.12;ENSG00000153944.12		Promoter_Associated	TRUE
cg02436606_BC21	0.13959	0.00244461	0.00173574	0.999957	chr8	5940888		OpenSea					FALSE
cg09335535_BC21	-0.0211321	0.00219853	0.00173645	0.999957	chr17	5004578		OpenSea	exon_12	KIF1C			FALSE
cg11851522_TC21	0.00973996	0.00244634	0.00173704	0.999957	chr11	72080676	chr11:72080339-72080914	Island	exon_1;exon_1;exon_1;exon_1;exon_1;exon_1;exon_1;exon_1;exon_1;exon_1;5UTR;5UTR;5UTR;5UTR;5UTR;5UTR;5UTR;5UTR;TSS1500;TSS200;TSS200;TSS1500;TSS200;TSS200;TSS200;TSS1500;TSS200;TSS200;TSS200;TSS1500;TSS200;TSS200;TSS200;TSS200;TSS200;TSS200;TSS200;TSS200;TSS200;TSS200;TSS200;TSS200;TSS200;TSS200;TSS200	NUMA1;NUMA1;LRTOMT;LRRC51;LRRC51;LRRC51;LRRC51;LRRC51;LRRC51;LRRC51;LRTOMT;LRRC51;LRRC51;LRRC51;LRRC51;LRRC51;LRRC51;NUMA1;ENSG00000137497.19;ENSG00000137497.19;ENSG00000137497.19;ENSG00000137497.19;ENSG00000137497.19;ENSG00000137497.19;ENSG00000137497.19;ENSG00000137497.19;ENSG00000137497.19;ENSG00000137497.19;ENSG00000137497.19;ENSG00000137497.19;ENSG00000137497.19;ENSG00000284922.2;ENSG0000028…		Promoter_Associated	TRUE
cg08309514_TC21	-0.106139	0.00219952	0.00173727	0.999957	chr4	128974283		OpenSea					FALSE
cg07086918_TC21	-0.15921	0.00220171	0.00173908	0.999957	chr5	177357687		OpenSea	TSS1500	ENSG00000169220.18		Promoter_Associated	TRUE
cg15209701_TC21	-0.0551831	0.00220252	0.00173975	0.999957	chr10	71851580	chr10:71850904-71851390	Shore	TSS1500	ENSG00000197746.15		Promoter_Associated	TRUE
cg04926134_TC21	-0.0316877	0.00220259	0.00173981	0.999957	chr2	164621742	chr2:164621052-164621832	Island	TSS1500;TSS1500;TSS1500	ENSG00000115290.11;ENSG00000115290.11;ENSG00000115290.11			FALSE
cg18069775_TC21	-0.0205853	0.0022026	0.00173982	0.999957	chr6	121380010		OpenSea	TSS1500;TSS1500	ENSG00000207403.1;ENSG00000220447.1			FALSE
cg02797907_BC21	0.178416	0.00245201	0.0017413	0.999957	chr14	65239340		OpenSea					FALSE
cg11321035_BC21	-0.0945989	0.00220494	0.00174175	0.999957	chr19	13834000	chr19:13830250-13830955;chr19:13833325-13833881	Shore	exon_1	MIR23AHG		Promoter_Associated	TRUE
cg00028135_TC21	-0.0494887	0.00220809	0.00174436	0.999957	chr3	114624826		OpenSea	TSS1500	ENSG00000181722.17			FALSE
cg27042278_BC21	-0.0948019	0.0022082	0.00174446	0.999957	chr14	91254183	chr14:91253232-91253884	Shore	TSS1500;TSS1500	ENSG00000119714.11;ENSG00000119714.11		Promoter_Associated	TRUE
cg16727279_BC21	0.0288354	0.0024567	0.00174482	0.999957	chr11	86998563		OpenSea					FALSE
cg16303846_BC11	0.0117199	0.00245701	0.00174506	0.999957	chr2	225042822	chr2:225041936-225042837	Island	TSS1500;TSS1500;TSS1500;TSS1500;TSS1500	ENSG00000135905.21;ENSG00000135905.21;ENSG00000135905.21;ENSG00000135905.21;ENSG00000135905.21			FALSE
cg12329766_BC21	0.0917286	0.00245784	0.00174568	0.999957	chr10	112297037		OpenSea					FALSE
cg21590180_TC21	0.100036	0.00245784	0.00174568	0.999957	chr16	48435533		OpenSea					FALSE
cg03820499_BC21	-0.179629	0.00221014	0.00174606	0.999957	chr13	99500674	chr13:99498438-99498766;chr13:99501111-99501884	Shore	exon_4;exon_2;exon_2;exon_2;exon_1;5UTR;5UTR;TSS1500;TSS1500	TM9SF2;TM9SF2;TM9SF2;ENSG00000280710;LINC00449;TM9SF2;TM9SF2;ENSG00000125304.10;ENSG00000280734.3			FALSE
cg07504610_TC21	0.0109722	0.00245882	0.00174642	0.999957	chr8	144103424	chr8:144103564-144105165	Shore	TSS1500;TSS1500	ENSG00000179632.10;ENSG00000179632.10			FALSE
cg13379679_BC21	0.00951666	0.00245891	0.00174648	0.999957	chr9	6413220	chr9:6412353-6414097	Island	exon_1;exon_1;exon_1;5UTR;5UTR;TSS200;TSS1500;TSS1500	UHRF2;UHRF2;UHRF2;UHRF2;UHRF2;ENSG00000147854.17;ENSG00000147854.17;ENSG00000147854.17		Promoter_Associated	TRUE
cg02956255_BC11	0.149694	0.0024598	0.00174715	0.999957	chr6	31462864		OpenSea	exon_1;TSS1500;TSS1500;TSS1500;TSS1500;TSS1500;TSS1500;TSS1500	ENSG00000233902;ENSG00000206337.12;ENSG00000206337.12;ENSG00000206337.12;ENSG00000206337.12;ENSG00000206337.12;ENSG00000206337.12;ENSG00000206337.12		Promoter_Associated	TRUE
cg02271687_TC21	-0.125188	0.00221224	0.0017478	0.999957	chr5	68289571	chr5:68288385-68288623	Shore	TSS1500;TSS1500;TSS1500;TSS1500;TSS1500;TSS1500;TSS1500;TSS1500	ENSG00000145675.16;ENSG00000145675.16;ENSG00000145675.16;ENSG00000145675.16;ENSG00000145675.16;ENSG00000145675.16;ENSG00000145675.16;ENSG00000145675.16		Unclassified_Cell_type_specific	TRUE
cg13647052_TC21	0.101328	0.00246085	0.00174794	0.999957	chr12	2691216	chr12:2690973-2691896	Island	exon_47;exon_47;exon_47;exon_47;exon_47;exon_48;exon_48;exon_49;exon_47;exon_47;exon_47;exon_48;exon_47;exon_48;exon_47;exon_47;exon_46;exon_46;exon_47;exon_47;exon_48;exon_47;exon_47;exon_47;exon_48;exon_47;exon_46;exon_47;exon_46;exon_18;exon_17;3UTR;3UTR;3UTR;3UTR;3UTR;3UTR;3UTR;3UTR;3UTR;3UTR;3UTR;3UTR;3UTR;3UTR;3UTR;3UTR;3UTR;3UTR;3UTR;3UTR;3UTR;3UTR;3UTR;3UTR;3UTR;3UTR;3UTR;3UTR;3UTR;TSS200…	CACNA1C;CACNA1C;CACNA1C;CACNA1C;CACNA1C;CACNA1C;CACNA1C;CACNA1C;CACNA1C;CACNA1C;CACNA1C;CACNA1C;CACNA1C;CACNA1C;CACNA1C;CACNA1C;CACNA1C;CACNA1C;CACNA1C;CACNA1C;CACNA1C;CACNA1C;CACNA1C;CACNA1C;CACNA1C;CACNA1C;CACNA1C;CACNA1C;CACNA1C;CACNA1C;CACNA1C;CACNA1C;CACNA1C;CACNA1C;CACNA1C;CACNA1C;CACNA1C;CACNA1C;CACNA1C;CACNA1C;CACNA1C;CACNA1C;CACNA1C;CACNA1C;CACNA1C;CACNA1C;CACNA1C;CACNA1C;CACNA1C;CACNA1C…		Promoter_Associated	TRUE
cg04027416_BC21	-0.0203668	0.00221274	0.00174821	0.999957	chr2	230430304		OpenSea					FALSE
cg05680831_BC21	0.0237968	0.00246184	0.00174869	0.999957	chr6	29525924		OpenSea					FALSE
cg18503066_TC21	-0.0648931	0.00221569	0.00175065	0.999957	chr10	124094923	chr10:124091635-124093717	Shore	TSS1500;TSS1500	ENSG00000182022.18;ENSG00000182022.18			FALSE
cg04970744_BC21	0.15059	0.002467	0.00175256	0.999957	chr6	30147109		OpenSea	exon_4;exon_3;exon_3	TRIM40;TRIM40;TRIM40			FALSE
cg08168739_BC21	-0.0723703	0.00222036	0.00175452	0.999957	chr5	78630090		OpenSea					FALSE
cg21810544_TC21	-0.0300496	0.0022222	0.00175605	0.999957	chr16	81465920		OpenSea	TSS1500	ENSG00000279021.1			FALSE
cg21146758_TC21	-0.0838069	0.00222359	0.0017572	0.999957	chr16	12010902		OpenSea				Unclassified_Cell_type_specific	TRUE
cg18003295_BC21	0.0334496	0.00247351	0.00175745	0.999957	chr12	32478753		OpenSea	TSS1500	ENSG00000253063.1			FALSE
cg00409245_BC21	0.0788838	0.0024764	0.00175963	0.999957	chr6	33789876	chr6:33788286-33789229	Shore	TSS1500;TSS1500;TSS1500;TSS1500	ENSG00000161904.12;ENSG00000161904.12;ENSG00000161904.12;ENSG00000161904.12			FALSE
cg26888530_TC11	-0.0159922	0.00222701	0.00176004	0.999957	chr4	7940065	chr4:7938836-7940126	Island	exon_1;exon_1;TSS1500;TSS200	ENSG00000228919;ENSG00000228919;ENSG00000196526.11;ENSG00000196526.11		Promoter_Associated	TRUE
cg03845745_BC21	-0.154303	0.00222802	0.00176087	0.999957	chr4	169008607	chr4:169009639-169010456	Shore					FALSE
cg17056225_BC21	-0.0343706	0.00223075	0.00176313	0.999957	chr11	126797649		OpenSea					FALSE
cg07107918_TC21	0.215127	0.00248205	0.00176387	0.999957	chr4	134998949		OpenSea					FALSE
cg23447960_BC21	0.0265087	0.00248499	0.00176608	0.999957	chr20	62013055		OpenSea	TSS200	ENSG00000130699.20		Gene_Associated_Cell_type_specific	TRUE
cg17242268_TC21	0.0553922	0.00248837	0.00176862	0.999957	chr3	153973918		OpenSea					FALSE
cg08704858_BC21	-0.0212549	0.00223885	0.00176984	0.999957	chr5	150397784		OpenSea					FALSE
cg08390865_TC11	-0.00684206	0.00223887	0.00176986	0.999957	chr6	109978243	chr6:109978162-109980064	Island	TSS200;TSS200	ENSG00000146360.9;ENSG00000146360.9			FALSE
cg03066079_BC21	-0.0370094	0.0022439	0.00177403	0.999957	chr17	61355130		OpenSea	exon_1	ENSG00000273982			FALSE
cg13131095_TC21	-0.0308783	0.00224516	0.00177507	0.999957	chr2	15942063	chr2:15939679-15942910	Island	exon_2;5UTR;TSS1500;TSS1500;TSS1500;TSS1500;TSS1500	MYCN;MYCN;ENSG00000233718.9;ENSG00000233718.9;ENSG00000134323.13;ENSG00000233718.9;ENSG00000233718.9			FALSE
cg13151083_BC21	0.0336107	0.00249772	0.00177565	0.999957	chr8	133239716		OpenSea	exon_1	NDRG1			FALSE
cg14609404_BC21	0.123122	0.00249856	0.00177629	0.999957	chr10	6170988		OpenSea					FALSE
cg00864151_TC21	-0.0354679	0.00224689	0.00177651	0.999957	chr7	1439454		OpenSea	exon_1;TSS200;TSS1500;TSS1500;TSS1500	MICALL2;ENSG00000164877.19;ENSG00000164877.19;ENSG00000164877.19;ENSG00000164877.19			FALSE
cg11879424_TC21	-0.0800039	0.00224936	0.00177856	0.999957	chr1	41467082		OpenSea	TSS200	ENSG00000252563.1			FALSE
cg17476952_BC21	-0.151608	0.00225203	0.00178077	0.999957	chr7	152202253		OpenSea					FALSE
cg22217463_TC21	0.0202641	0.00250459	0.00178082	0.999957	chr17	4931546		OpenSea	TSS1500	ENSG00000185245.9			FALSE
cg19520927_BC11	0.123149	0.0025046	0.00178082	0.999957	chr11	44320096	chr11:44316147-44317233;chr11:44319715-44320207	Island					FALSE
cg13978095_TC21	0.0890823	0.00250989	0.0017848	0.999957	chr12	14111483		OpenSea					FALSE
cg25203539_TC21	-0.0810308	0.00226347	0.00179025	0.999957	chr1	1340198	chr1:1336045-1336694;chr1:1336997-1337254;chr1:1338106-1340460;chr1:1341237-1341468	Island	TSS1500;TSS200;TSS200;TSS1500	ENSG00000107404.21;ENSG00000107404.21;ENSG00000107404.21;ENSG00000284372.1			FALSE
cg09529591_TC21	0.0663769	0.00251857	0.00179134	0.999957	chr1	117681309		OpenSea					FALSE
cg13386591_BC21	0.10793	0.00251969	0.00179218	0.999957	chr7	138919494		OpenSea					FALSE
cg16694793_TC21	0.115245	0.00252001	0.00179242	0.999957	chr4	87945632		OpenSea					FALSE
cg05862431_TC21	-0.0769943	0.00226796	0.00179398	0.999957	chr11	116773482	chr11:116772593-116773176	Shore	exon_1;TSS1500;TSS1500	BUD13-DT;ENSG00000137656.12;ENSG00000137656.12		Promoter_Associated	TRUE
cg23505596_BC21	-0.0455556	0.00227063	0.00179619	0.999957	chr17	30988231		OpenSea					FALSE
cg15451698_TC21	-0.0505868	0.00227733	0.00180174	0.999957	chr1	110714479		OpenSea					FALSE
cg11751810_TC11	0.0281373	0.00253456	0.00180337	0.999957	chr17	238495	chr17:235218-235623	Shelf					FALSE
cg21676242_BC21	0.133154	0.00253534	0.00180395	0.999957	chr13	28719485	chr13:28718533-28719192	Shore	TSS1500;TSS1500	ENSG00000139508.15;ENSG00000139508.15		Promoter_Associated	TRUE
cg08100972_BC21	0.0572414	0.00253592	0.00180439	0.999957	chr20	13991718	chr20:13995122-13996422	Shelf	TSS1500;TSS1500;TSS1500	ENSG00000101251.13;ENSG00000101251.13;ENSG00000101251.13			FALSE
cg02667304_TC21	0.0364934	0.00253612	0.00180454	0.999957	chr5	32837469		OpenSea					FALSE
cg24718846_TC11	0.0199133	0.00253685	0.00180509	0.999957	chr6	31497826	chr6:31493909-31494376;chr6:31497683-31498411	Island	TSS1500;TSS1500;TSS1500	ENSG00000204516.10;ENSG00000204516.10;ENSG00000201680.1		Promoter_Associated	TRUE
cg14125360_BC21	0.0448342	0.0025475	0.0018131	0.999957	chr9	112924943		OpenSea					FALSE
cg09166237_BC21	0.105086	0.00254773	0.00181328	0.999957	chr17	42900603		OpenSea	TSS200;TSS200;TSS200;TSS1500	ENSG00000131482.10;ENSG00000131482.10;ENSG00000131482.10;ENSG00000131482.10			FALSE
cg24518084_TC21	-0.111809	0.00229169	0.00181365	0.999957	chr14	96277385		OpenSea	TSS1500;TSS1500	ENSG00000258729.2;ENSG00000258729.2			FALSE
cg08920393_BC21	-0.0219522	0.00229494	0.00181636	0.999957	chr11	62600516	chr11:62600982-62603019	Shore	TSS1500;TSS200	ENSG00000149480.7;ENSG00000149480.7			FALSE
cg07322925_TC21	0.17701	0.00255445	0.00181834	0.999957	chr3	39808633	chr3:39809269-39810329	Shore	TSS1500;TSS1500;TSS1500;TSS1500;TSS1500;TSS1500	ENSG00000170011.14;ENSG00000170011.14;ENSG00000170011.14;ENSG00000170011.14;ENSG00000170011.14;ENSG00000170011.14			FALSE
cg05349376_BC21	-0.0584111	0.00229949	0.00182013	0.999957	chr3	111779729		OpenSea					FALSE
cg12340037_TC21	0.163402	0.00255687	0.00182016	0.999957	chr12	101799942		OpenSea					FALSE
cg27376553_TC21	0.0293505	0.00255742	0.00182058	0.999957	chr4	70820229		OpenSea	exon_10;exon_9;exon_10;3UTR;5UTR	GRSF1;GRSF1;GRSF1;GRSF1;GRSF1			FALSE
cg12398265_BC21	0.0821583	0.00255879	0.00182161	0.999957	chr8	33118656		OpenSea					FALSE
cg15799543_BC21	0.134938	0.00256037	0.00182279	0.999957	chr4	169946076		OpenSea	exon_1	ENSG00000251200			FALSE
cg22101863_BC21	0.0881325	0.00256165	0.00182376	0.999957	chr1	170532666		OpenSea	exon_1;TSS200;TSS1500;TSS1500;TSS1500	GORAB;ENSG00000231407.6;ENSG00000231407.6;ENSG00000231407.6;ENSG00000120370.14		Promoter_Associated	TRUE
cg25649254_BC21	0.196191	0.00256347	0.00182513	0.999957	chr3	39131962		OpenSea	TSS1500;TSS1500	ENSG00000168026.19;ENSG00000168026.19			FALSE
cg05501872_BC21	-0.0407425	0.00230553	0.00182514	0.999957	chr3	129108188		OpenSea					FALSE
cg06297857_BC11	-0.039378	0.00230579	0.00182535	0.999957	chr16	58158024		OpenSea	exon_11;exon_10;exon_12;exon_6;exon_10;3UTR;3UTR	CSNK2A2;CSNK2A2;CSNK2A2;CSNK2A2;CSNK2A2;CSNK2A2;CSNK2A2			FALSE
cg20807030_BC11	-0.00757539	0.00230919	0.00182818	0.999957	chr8	66613337	chr8:66612372-66613824	Island	exon_1;TSS200;TSS200;TSS1500;TSS1500	MYBL1;ENSG00000185697.17;ENSG00000185697.17;ENSG00000185697.17;ENSG00000185697.17		Promoter_Associated	TRUE
cg01446477_TC11	0.0103415	0.00256792	0.00182848	0.999957	chr1	28369659	chr1:28369530-28370220	Island	exon_1;exon_1;5UTR;TSS200;TSS200;TSS200;TSS200	PHACTR4;PHACTR4;PHACTR4;ENSG00000204138.13;ENSG00000204138.13;ENSG00000204138.13;ENSG00000204138.13		Promoter_Associated	TRUE
cg04193626_BC21	0.077811	0.00256838	0.00182883	0.999957	chr5	134982060		OpenSea					FALSE
cg16746665_TC21	-0.0451221	0.00231075	0.00182947	0.999957	chr16	72226399		OpenSea	TSS1500	ENSG00000261673.1			FALSE
cg16873736_BC21	-0.0527388	0.00231176	0.00183031	0.999957	chr1	143721168		OpenSea	TSS1500	ENSG00000252826.1			FALSE
cg13452099_BC21	0.109189	0.00257072	0.00183059	0.999957	chr9	16414507		OpenSea	exon_7;3UTR	BNC2;BNC2			FALSE
cg02452695_BC21	-0.0403202	0.00231495	0.00183296	0.999957	chr9	136469322	chr9:136466231-136466691;chr9:136472733-136472957	Shelf					FALSE
cg07133174_TC21	-0.107567	0.00231623	0.00183402	0.999957	chr21	36988550	chr21:36989845-36990568	Shore					FALSE
cg01807946_BC21	-0.04141	0.0023164	0.00183416	0.999957	chr17	82247605	chr17:82244923-82245413;chr17:82248813-82249051;chr17:82250320-82250563	Shore	exon_7;TSS1500;TSS1500	CSNK1D;ENSG00000141551.15;ENSG00000280407.3			FALSE
cg21209998_BC21	-0.0359537	0.00231745	0.00183503	0.999957	chr15	67254253	chr15:67254451-67255072	Shore	exon_1;TSS1500;TSS1500;TSS1500;TSS1500;TSS1500;TSS1500;TSS1500	AAGAB;ENSG00000103599.20;ENSG00000103599.20;ENSG00000103599.20;ENSG00000103599.20;ENSG00000103599.20;ENSG00000103599.20;ENSG00000103599.20		Promoter_Associated	TRUE
cg27414909_BC11	0.00778605	0.0025819	0.00183901	0.999957	chr4	1207704	chr4:1209168-1209412	Shore					FALSE
cg07352345_TC11	0.0143069	0.00258381	0.00184045	0.999957	chr5	176366046	chr5:176365352-176366502	Island	TSS1500	ENSG00000175414.7		Unclassified	TRUE
cg09556182_BC21	-0.0984176	0.0023243	0.00184072	0.999957	chr22	20171702		OpenSea					FALSE
cg12257699_BC21	0.109052	0.0025851	0.00184143	0.999957	chr8	19386183		OpenSea					FALSE
cg08717931_BC21	0.162006	0.00258622	0.00184227	0.999957	chr1	32151523		OpenSea					FALSE
cg09934894_BC11	0.0286118	0.00259139	0.00184616	0.999957	chr14	95516544	chr14:95516161-95517196	Island				Promoter_Associated	TRUE
cg09200628_TC21	0.0980691	0.00259233	0.00184687	0.999957	chr9	130500740		OpenSea					FALSE
cg04959788_TC11	-0.0106393	0.00233207	0.00184717	0.999957	chr1	44842957	chr1:44842871-44843487	Island	exon_1;5UTR;TSS200	PTCH2;PTCH2;ENSG00000117425.14		Unclassified	TRUE
cg06202977_TC21	0.016005	0.00259279	0.00184722	0.999957	chr12	130872643	chr12:130871565-130872683	Island	exon_2;TSS1500	RAN;ENSG00000132341.12			FALSE
cg23319960_TC11	-0.00627891	0.00233245	0.00184748	0.999957	chr8	101205321	chr8:101205089-101206233	Island	exon_1;5UTR;TSS1500;TSS200	ZNF706;ZNF706;ENSG00000120963.12;ENSG00000120963.12			FALSE
cg11760688_BC21	-0.0567551	0.00233248	0.00184751	0.999957	chr9	33469646		OpenSea	exon_5;exon_5;exon_5;exon_4	NOL6;NOL6;NOL6;NOL6			FALSE
cg22877178_TC21	-0.0197136	0.0023336	0.00184844	0.999957	chr20	57984909		OpenSea					FALSE
cg21877855_TC21	-0.0128427	0.00233475	0.0018494	0.999957	chr1	63523454		OpenSea	exon_1;exon_1;5UTR;TSS1500;TSS1500;TSS1500;TSS1500;TSS200;TSS1500;TSS1500;TSS200	ITGB3BP;EFCAB7;ITGB3BP;ENSG00000142856.17;ENSG00000142856.17;ENSG00000142856.17;ENSG00000142856.17;ENSG00000142856.17;ENSG00000142856.17;ENSG00000142856.17;ENSG00000203965.13		Promoter_Associated	TRUE
cg19698340_BC21	-0.109737	0.00233635	0.00185072	0.999957	chr17	17943404		OpenSea					FALSE
cg13047970_BC21	0.0767244	0.00259939	0.00185219	0.999957	chr10	122087659		OpenSea	exon_4;exon_4;exon_4;exon_3;exon_3	TACC2;TACC2;TACC2;TACC2;TACC2			FALSE
cg23111488_TC21	0.15617	0.00259959	0.00185234	0.999957	chr5	145158787		OpenSea					FALSE
cg20564259_BC21	-0.122559	0.00233839	0.00185242	0.999957	chr5	149496470		OpenSea	exon_11;exon_10;exon_10;exon_11;exon_11;exon_9;exon_11;exon_9;exon_10;exon_11;exon_2;3UTR;3UTR;3UTR;3UTR;3UTR;3UTR;3UTR;3UTR;3UTR	CSNK1A1;CSNK1A1;CSNK1A1;CSNK1A1;CSNK1A1;CSNK1A1;CSNK1A1;CSNK1A1;CSNK1A1;CSNK1A1;ENSG00000230551;CSNK1A1;CSNK1A1;CSNK1A1;CSNK1A1;CSNK1A1;CSNK1A1;CSNK1A1;CSNK1A1;CSNK1A1			FALSE
cg06408522_TC21	-0.0362969	0.00234127	0.00185481	0.999957	chr6	2959402		OpenSea	exon_1;TSS1500	SERPINB6;ENSG00000124570.21			FALSE
cg22964740_BC21	0.023603	0.00260594	0.00185713	0.999957	chr9	100065417		OpenSea					FALSE
cg03427619_TC21	0.0400982	0.00260618	0.00185731	0.999957	chr8	39920940		OpenSea	TSS200	ENSG00000254287.1			FALSE
cg23608266_TC21	-0.0592348	0.00234466	0.00185762	0.999957	chr18	58232079		OpenSea					FALSE
cg23876635_BC21	-0.0448637	0.00234561	0.00185842	0.999957	chr1	51263931		OpenSea					FALSE
cg17444709_TC21	-0.105646	0.00234599	0.00185873	0.999957	chr12	3073225	chr12:3076845-3077802	Shelf	TSS1500	ENSG00000234589.4		Unclassified	TRUE
cg12050728_TC21	-0.0318122	0.0023473	0.00185982	0.999957	chr17	2362098	chr17:2362198-2362582	Shore	TSS1500	ENSG00000141258.13			FALSE
cg24545421_BC21	-0.0471267	0.00235095	0.00186285	0.999957	chr1	156432377	chr1:156435368-156436558	Shelf					FALSE
cg17679621_TC21	0.0475952	0.00261466	0.0018637	0.999957	chr2	107986328	chr2:107986368-107987011	Shore	TSS200;TSS200	ENSG00000115665.9;ENSG00000115665.9			FALSE
cg05682482_BC21	0.119431	0.00261507	0.00186401	0.999957	chr10	78197088		OpenSea					FALSE
ch.2.62306258F_BC21	0.0122887	0.00262068	0.00186824	0.999957	chr2	62225619		OpenSea					FALSE
cg19341875_BC21	-0.107255	0.00235831	0.00186896	0.999957	chr14	31166547		OpenSea					FALSE
cg05975055_BC21	-0.0950523	0.00235846	0.00186908	0.999957	chr3	190125720		OpenSea					FALSE
cg00619505_TC21	-0.0214847	0.00236156	0.00187166	0.999957	chr13	113518575		OpenSea					FALSE
cg04824490_BC21	0.113379	0.0026303	0.0018755	0.999957	chr3	42299842		OpenSea					FALSE
cg19045559_TC21	0.0716021	0.00263089	0.00187594	0.999957	chr2	127618200		OpenSea					FALSE
cg12998145_BC11	0.0266752	0.00263193	0.00187672	0.999957	chr9	470128	chr9:470108-470324	Island	TSS1500;TSS1500;TSS1500;TSS200;TSS200;TSS200;TSS200;TSS1500;TSS1500;TSS1500	ENSG00000227155.7;ENSG00000227155.7;ENSG00000227155.7;ENSG00000107104.21;ENSG00000107104.21;ENSG00000107104.21;ENSG00000107104.21;ENSG00000107104.21;ENSG00000107104.21;ENSG00000107104.21		Promoter_Associated	TRUE
cg23877401_TC11	0.00518687	0.00263292	0.00187747	0.999957	chr12	121579342	chr12:121578265-121580682	Island	TSS1500	ENSG00000256742.1			FALSE
cg06034459_TC21	-0.114486	0.00236873	0.00187762	0.999957	chr3	196788772		OpenSea					FALSE
cg02056245_BC21	-0.103186	0.00236956	0.00187831	0.999957	chr2	240983938	chr2:240983360-240983726	Shore				Unclassified	TRUE
cg00721530_TC11	-0.0875482	0.00237048	0.00187907	0.999957	chr15	89408173	chr15:89406142-89407899;chr15:89409040-89409830;chr15:89411372-89411951	Shore				Unclassified_Cell_type_specific	TRUE
cg11524198_BC21	-0.0664986	0.00237277	0.00188098	0.999957	chr7	105261805		OpenSea					FALSE
cg27347124_TC11	0.00572315	0.00263918	0.00188219	0.999957	chr19	2944945	chr19:2944684-2945509	Island	exon_1;exon_1;5UTR	ZNF77;ZNF77;ZNF77		Promoter_Associated	TRUE
cg14186240_BC21	0.0472028	0.00264254	0.00188473	0.999957	chr9	120568415		OpenSea					FALSE
cg16309224_BC21	0.0706608	0.00264512	0.00188667	0.999957	chr1	42154692		OpenSea	exon_2	GUCA2B			FALSE
cg10577385_BC21	-0.0698734	0.00238184	0.00188851	0.999957	chr7	2921141		OpenSea					FALSE
cg08769507_TC21	-0.0534038	0.00238552	0.00189157	0.999957	chr5	168165664		OpenSea				Unclassified_Cell_type_specific	TRUE
cg27065869_TC11	-0.0602317	0.00238696	0.00189277	0.999957	chr12	118145424		OpenSea	exon_4;3UTR	PEBP1;PEBP1			FALSE
cg14272208_TC21	-0.0343443	0.00238727	0.00189302	0.999957	chr22	42604095		OpenSea	TSS1500	ENSG00000100227.19			FALSE
cg22111239_TC21	0.196518	0.00265373	0.00189317	0.999957	chr4	70992902	chr4:70993441-70994167	Shore	exon_2;5UTR;TSS1500;TSS1500;TSS1500;TSS1500	DCK;DCK;ENSG00000156136.10;ENSG00000156136.10;ENSG00000156136.10;ENSG00000156136.10		Promoter_Associated	TRUE
cg22211164_TC21	0.119981	0.00265457	0.0018938	0.999957	chr2	68387869		OpenSea	TSS200	ENSG00000115956.10		Promoter_Associated_Cell_type_specific	TRUE
cg04880355_TC21	-0.0829576	0.00238831	0.00189389	0.999957	chr22	45202452	chr22:45202840-45203199	Shore	TSS1500	ENSG00000221598.3			FALSE
cg02130344_BC21	-0.0962867	0.00239009	0.00189537	0.999957	chr1	233654804		OpenSea	TSS1500	ENSG00000135750.15			FALSE
cg09940284_BC21	-0.028877	0.00239108	0.00189619	0.999957	chr18	45103008		OpenSea					FALSE
cg18367751_TC21	0.0167844	0.00266337	0.00190044	0.999957	chr2	218985060	chr2:218981569-218982415;chr2:218984197-218984742;chr2:218985138-218985789	Shore	exon_1;TSS1500	FEV;ENSG00000163497.3		Unclassified_Cell_type_specific	TRUE
cg03223159_BC21	0.18259	0.00266465	0.00190141	0.999957	chr4	145107328		OpenSea	TSS1500	ENSG00000164163.11			FALSE
cg17090871_TC21	-0.0394045	0.00240032	0.00190387	0.999957	chr3	183784227		OpenSea					FALSE
cg14311538_TC11	0.0106773	0.00266844	0.00190427	0.999957	chr9	136454323	chr9:136451185-136451414;chr9:136455071-136455353	Shore	exon_19;exon_20;exon_10;exon_16;exon_19;exon_21;exon_3;exon_21;exon_19	SEC16A;SEC16A;SEC16A;SEC16A;SEC16A;SEC16A;SEC16A;SEC16A;SEC16A			FALSE
cg11025437_BC21	0.043498	0.00267208	0.00190702	0.999957	chr11	80328730		OpenSea	TSS1500	ENSG00000254434.1			FALSE
cg02520660_BC21	-0.0227299	0.00240442	0.00190728	0.999957	chr3	52407064	chr3:52409661-52410118;chr3:52410550-52411088	Shelf	TSS1500	ENSG00000163930.10			FALSE
cg16178186_BC11	-0.00668619	0.00240672	0.0019092	0.999957	chr1	182604478	chr1:182604240-182604625	Island	TSS200	ENSG00000143333.7		Promoter_Associated	TRUE
cg16420210_BC21	0.155299	0.00267526	0.00190942	0.999957	chr8	137147125		OpenSea					FALSE
cg10520769_TC21	-0.107688	0.00240703	0.00190946	0.999957	chr7	957200	chr7:953765-954938	Shelf					FALSE
cg16545752_BC21	0.0779898	0.00267649	0.00191035	0.999957	chr11	69030538		OpenSea					FALSE
cg23611945_BC21	0.0490905	0.00267707	0.00191079	0.999957	chr20	45912514	chr20:45911806-45912318	Shore	TSS1500;TSS1500;TSS1500;TSS1500	ENSG00000100979.15;ENSG00000100979.15;ENSG00000100979.15;ENSG00000100979.15		Unclassified_Cell_type_specific	TRUE
cg18524177_BC21	-0.0256636	0.00241018	0.00191207	0.999957	chr10	124538647		OpenSea					FALSE
cg25654768_TC21	0.080777	0.00268031	0.00191323	0.999957	chr7	100975653		OpenSea				Unclassified_Cell_type_specific	TRUE
cg12863341_BC21	-0.076616	0.00241401	0.00191526	0.999957	chr8	94774979		OpenSea					FALSE
cg20718214_BC11	-0.0122212	0.00241426	0.00191547	0.999957	chr10	101839943	chr10:101840786-101841476;chr10:101843409-101843669	Shore	TSS200	ENSG00000120049.20		Unclassified	TRUE
cg03501332_BC21	0.0289649	0.00268503	0.0019168	0.999957	chr20	51586104		OpenSea					FALSE
cg23398156_TC21	0.0955882	0.00268527	0.00191698	0.999957	chr2	136239316		OpenSea			chr2:136238748-136239322	Promoter_Associated	TRUE
cg26258354_BC21	-0.185776	0.00241744	0.00191811	0.999957	chr18	73669998		OpenSea					FALSE
cg15246619_BC21	0.069616	0.00268947	0.00192015	0.999957	chr8	22047951	chr8:22047950-22048246;chr8:22048823-22049419	Island	TSS1500;TSS1500	ENSG00000158856.19;ENSG00000158856.19			FALSE
cg25275750_BC21	-0.0361099	0.00242008	0.0019203	0.999957	chr13	75344561		OpenSea					FALSE
cg25250431_TC21	-0.040233	0.00242045	0.00192061	0.999957	chr6	31798462	chr6:31795463-31796128	Shelf					FALSE
cg15230646_BC21	0.0241206	0.00269152	0.00192169	0.999957	chr10	73663726		OpenSea	exon_1;5UTR	SYNPO2L;SYNPO2L			FALSE
cg20443798_BC21	0.0600349	0.00269497	0.0019243	0.999957	chr2	132672453	chr2:132669079-132671297	Shore	exon_20;exon_3;exon_2;3UTR;5UTR;5UTR;TSS1500	NCKAP5;NCKAP5;NCKAP5;NCKAP5;NCKAP5;NCKAP5;ENSG00000150551.11			FALSE
cg21386560_TC21	-0.0264946	0.0024264	0.00192556	0.999957	chr11	10631885		OpenSea					FALSE
cg26982883_BC21	-0.0163609	0.00242732	0.00192633	0.999957	chr9	128714959		OpenSea					FALSE
cg23991876_BC11	0.0207897	0.00270022	0.00192826	0.999957	chr15	43613534		OpenSea	TSS1500;TSS1500;TSS1500;TSS1500;TSS1500;TSS1500	ENSG00000242866.10;ENSG00000242866.10;ENSG00000242866.10;ENSG00000242866.10;ENSG00000242866.10;ENSG00000242866.10			FALSE
cg23888354_BC21	0.138021	0.0027007	0.00192863	0.999957	chr6	154166313		OpenSea					FALSE
cg16099638_BC21	0.0812418	0.00270489	0.00193179	0.999957	chr8	144069066		OpenSea					FALSE
cg14782266_TC11	-0.0174752	0.00243442	0.00193224	0.999957	chr2	42338227		OpenSea				Unclassified_Cell_type_specific	TRUE
cg13830991_TC21	0.0274165	0.00270603	0.00193265	0.999957	chr17	50245717		OpenSea					FALSE
cg12939139_TC21	-0.0627953	0.00243657	0.00193402	0.999957	chr10	73586465		OpenSea					FALSE
cg03370821_BC21	-0.132404	0.00243673	0.00193415	0.999957	chr1	96721162	chr1:96721546-96722263	Shore	TSS1500;TSS1500;TSS1500;TSS1500;TSS1500;TSS1500;TSS1500;TSS1500;TSS1500;TSS1500;TSS1500;TSS1500;TSS1500;TSS1500	ENSG00000117569.19;ENSG00000117569.19;ENSG00000117569.19;ENSG00000117569.19;ENSG00000117569.19;ENSG00000117569.19;ENSG00000117569.19;ENSG00000117569.19;ENSG00000117569.19;ENSG00000117569.19;ENSG00000117569.19;ENSG00000117569.19;ENSG00000117569.19;ENSG00000117569.19			FALSE
cg06752558_BC11	0.0104229	0.00270809	0.00193421	0.999957	chr14	23556058	chr14:23555797-23556368	Island	exon_1;exon_1;exon_1;5UTR;5UTR;TSS200;TSS1500;TSS1500;TSS1500;TSS1500;TSS1500	ZFHX2;THTPA;THTPA;THTPA;ZFHX2;ENSG00000259431.6;ENSG00000259431.6;ENSG00000259431.6;ENSG00000259431.6;ENSG00000259431.6;ENSG00000259431.6		Promoter_Associated	TRUE
cg16654973_BC21	-0.0762307	0.00243883	0.0019359	0.999957	chr11	77112920		OpenSea					FALSE
cg26415148_TC21	0.0212706	0.00271295	0.00193788	0.999957	chr3	197297315	chr3:197298981-197299234;chr3:197297556-197298635	Shore	exon_1;5UTR;TSS1500;TSS200;TSS1500;TSS1500;TSS1500;TSS1500	DLG1;DLG1;ENSG00000075711.21;ENSG00000075711.21;ENSG00000075711.21;ENSG00000075711.21;ENSG00000227375.6;ENSG00000227375.6			FALSE
cg17536071_TC21	0.121558	0.00271315	0.00193803	0.999957	chr4	70518282		OpenSea	TSS1500;TSS1500	ENSG00000187689.10;ENSG00000187689.10			FALSE
cg22521548_BC21	0.105245	0.00271415	0.00193879	0.999957	chr18	70228864		OpenSea					FALSE
cg15107624_BC21	0.149896	0.00271704	0.00194097	0.999957	chr10	60630804		OpenSea					FALSE
cg27586068_BC11	0.0132808	0.00271732	0.00194118	0.999957	chr19	3500444	chr19:3500418-3500842	Island				Promoter_Associated	TRUE
cg17820309_BC21	-0.0552875	0.00244722	0.00194289	0.999957	chr13	99428785		OpenSea					FALSE
cg12751593_TC21	-0.0636143	0.00244993	0.00194514	0.999957	chr1	153726422	chr1:153727740-153728025	Shore	TSS200	ENSG00000199565.1			FALSE
cg07880357_TC21	0.017228	0.00272854	0.00194967	0.999957	chr17	54900506	chr17:54900505-54900946	Island	exon_2;exon_2;5UTR;TSS1500;TSS1500;TSS1500;TSS1500;TSS1500;TSS1500;TSS1500;TSS1500;TSS1500;TSS1500;TSS1500;TSS1500;TSS1500;TSS1500;TSS1500;TSS1500	TOM1L1;TOM1L1;TOM1L1;ENSG00000141198.16;ENSG00000141198.16;ENSG00000141198.16;ENSG00000141198.16;ENSG00000141198.16;ENSG00000141198.16;ENSG00000141198.16;ENSG00000141198.16;ENSG00000141198.16;ENSG00000141198.16;ENSG00000141198.16;ENSG00000141198.16;ENSG00000141198.16;ENSG00000141198.16;ENSG00000141198.16;ENSG00000141198.16			FALSE
cg00776091_BC21	-0.0437702	0.00245661	0.0019507	0.999957	chr14	46661809		OpenSea					FALSE
cg17416742_BC21	0.0722057	0.00273079	0.00195137	0.999957	chr7	39356712		OpenSea					FALSE
cg09107796_BC21	0.0310397	0.00273169	0.00195204	0.999957	chr17	16142956		OpenSea					FALSE
cg27645010_BC21	-0.0460575	0.00246168	0.00195492	0.999957	chr4	82858015		OpenSea	TSS200	ENSG00000138674.17			FALSE
cg16926213_TC11	-0.159003	0.00246193	0.00195513	0.999957	chr1	1909875	chr1:1908519-1909162	Shore				Promoter_Associated	TRUE
cg19366267_TC21	0.0974861	0.00273914	0.00195767	0.999957	chr8	100334601		OpenSea					FALSE
cg07072722_BC11	-0.00835458	0.00246734	0.00195963	0.999957	chr11	131911352	chr11:131910458-131911638	Island	exon_1;5UTR;TSS200;TSS200;TSS200	NTM;NTM;ENSG00000182667.15;ENSG00000182667.15;ENSG00000182667.15		Unclassified_Cell_type_specific	TRUE
cg10941966_TC21	0.123784	0.00274376	0.00196117	0.999957	chr3	108462990		OpenSea	TSS1500	ENSG00000144821.11			FALSE
cg14025226_BC11	-0.012232	0.00247053	0.00196229	0.999957	chr9	100427128	chr9:100427494-100427738	Shore	TSS200;TSS200;TSS200;TSS1500;TSS1500	ENSG00000066697.15;ENSG00000066697.15;ENSG00000066697.15;ENSG00000066697.15;ENSG00000066697.15		Promoter_Associated	TRUE
cg10689766_BC21	-0.0517512	0.00247232	0.00196377	0.999957	chr7	12716458		OpenSea					FALSE
cg27214687_TC11	-0.0165753	0.00247261	0.00196402	0.999957	chr2	240444100		OpenSea					FALSE
cg27024654_TC11	-0.101643	0.00247729	0.00196792	0.999957	chr5	134568984		OpenSea					FALSE
cg02656525_TC11	-0.020094	0.00247853	0.00196895	0.999957	chr5	111092156	chr5:111092079-111092572	Island	TSS200;TSS200;TSS200;TSS200	ENSG00000253613.2;ENSG00000134987.13;ENSG00000134987.13;ENSG00000134987.13		Promoter_Associated	TRUE
cg22069559_TC21	-0.126929	0.00248082	0.00197085	0.999957	chr6	36617216		OpenSea					FALSE
cg24227837_BC11	-0.0240328	0.00248342	0.00197302	0.999957	chr13	26046814	chr13:26050587-26052127	Shelf	exon_2	SHISA2			FALSE
cg22188627_BC21	-0.117465	0.00248376	0.0019733	0.999957	chr4	89549945		OpenSea	TSS1500;TSS1500	ENSG00000251095.8;ENSG00000251095.8			FALSE
cg20305489_BC21	0.0185707	0.00276147	0.00197456	0.999957	chr17	77320398		OpenSea					FALSE
cg00043891_BC21	-0.116561	0.0024858	0.001975	0.999957	chr1	1909895	chr1:1908519-1909162	Shore				Promoter_Associated	TRUE
cg12787036_BC21	-0.0592199	0.00248655	0.00197563	0.999957	chr6	4930859		OpenSea					FALSE
cg24594963_BC21	0.0358913	0.00276412	0.00197657	0.999957	chr8	10474166		OpenSea	TSS1500	ENSG00000253641.6		Unclassified_Cell_type_specific	TRUE
cg06927555_TC21	0.151814	0.00276483	0.0019771	0.999957	chr4	107468849		OpenSea					FALSE
cg07023544_BC21	-0.0703927	0.0024893	0.00197791	0.999957	chr7	155752816		OpenSea				Unclassified_Cell_type_specific	TRUE
cg10871120_TC21	-0.0641655	0.00249093	0.00197928	0.999957	chr6	39923529		OpenSea					FALSE
cg02447380_TC11	-0.0188272	0.00249365	0.00198154	0.999957	chr1	28592788	chr1:28592479-28592942	Island				Unclassified	TRUE
cg09654300_BC21	-0.182144	0.00249369	0.00198158	0.999957	chr3	42091499		OpenSea	exon_1	TRAK1			FALSE
cg08294986_TC21	-0.0149543	0.0024957	0.00198325	0.999957	chr11	119356310	chr11:119356386-119357048	Shore	exon_13;exon_12;3UTR;3UTR	USP2;USP2;USP2;USP2		Unclassified	TRUE
cg12730247_BC21	-0.0454231	0.00249718	0.00198448	0.999957	chr8	73959522		OpenSea					FALSE
cg26302736_TC21	0.0964826	0.00277502	0.00198481	0.999957	chr3	191402226		OpenSea					FALSE
cg06338664_BC21	-0.222284	0.00250007	0.00198689	0.999957	chr17	16287253		OpenSea					FALSE
cg18218855_TC11	0.00788295	0.00278011	0.00198866	0.999957	chr12	753497	chr12:752276-754247	Island	5UTR;5UTR;5UTR;5UTR;5UTR;5UTR;exon_1;exon_1;exon_1;exon_1;exon_1;exon_1	WNK1;WNK1;WNK1;WNK1;WNK1;WNK1;WNK1;WNK1;WNK1;WNK1;WNK1;WNK1			FALSE
cg23979658_BC21	-0.129922	0.00250364	0.00198986	0.999957	chr8	90889317		OpenSea					FALSE
cg00067824_TC11	-0.0974845	0.00250486	0.00199087	0.999957	chr10	23203985		OpenSea	exon_15;exon_16;3UTR;5UTR	C10orf67;C10orf67;C10orf67;C10orf67			FALSE
cg16216907_BC21	-0.059017	0.00250523	0.00199119	0.999957	chr7	42227831		OpenSea	TSS200	ENSG00000106571.15			FALSE
cg09503838_BC21	-0.118446	0.00250569	0.00199157	0.999957	chr15	40903242		OpenSea	exon_5	VPS18			FALSE
cg01229952_BC21	0.0610773	0.00278459	0.00199205	0.999957	chr17	76131650		OpenSea					FALSE
cg04324167_BC21	-0.0469423	0.00250695	0.00199262	0.999957	chr11	129972575		OpenSea					FALSE
cg06614534_TC21	0.0527016	0.00278593	0.00199306	0.999957	chr16	3755034		OpenSea					FALSE
cg05937269_TC21	0.0669922	0.00278734	0.00199413	0.999957	chr18	61088357		OpenSea					FALSE
cg11811510_BC21	0.172452	0.00278861	0.00199509	0.999957	chr19	42528531		OpenSea	TSS200;TSS200;TSS200;TSS200;TSS200;TSS200;TSS200;TSS200;TSS200;TSS1500	ENSG00000079385.23;ENSG00000079385.23;ENSG00000079385.23;ENSG00000079385.23;ENSG00000079385.23;ENSG00000079385.23;ENSG00000079385.23;ENSG00000079385.23;ENSG00000079385.23;ENSG00000079385.23		Promoter_Associated	TRUE
cg06862696_BC11	0.0788571	0.00278904	0.00199542	0.999957	chr19	11359533	chr19:11361229-11361623;chr19:11362418-11362678	Shore	exon_4;exon_4;exon_4;exon_4;exon_2;TSS200	PLPPR2;PLPPR2;PLPPR2;PLPPR2;PLPPR2;ENSG00000105520.11			FALSE
cg11939399_TC21	-0.125126	0.00251125	0.0019962	0.999957	chr4	56907134	chr4:56907701-56909436	Shore	TSS1500;TSS1500;TSS1500;TSS1500;TSS1500;TSS1500;TSS1500	ENSG00000084093.19;ENSG00000084093.19;ENSG00000084093.19;ENSG00000084093.19;ENSG00000084093.19;ENSG00000084093.19;ENSG00000084093.19			FALSE
cg20145897_BC21	0.156791	0.00279025	0.00199633	0.999957	chr4	187309922		OpenSea	TSS1500	ENSG00000250658.1			FALSE
cg05374623_TC21	0.0225515	0.002792	0.00199765	0.999957	chr7	101217862	chr7:101217016-101217748	Shore	exon_1;exon_1;exon_2;exon_2;5UTR;TSS1500;TSS1500;TSS1500;TSS1500;TSS1500;TSS1500	PLOD3;PLOD3;PLOD3;PLOD3;PLOD3;ENSG00000106397.12;ENSG00000106397.12;ENSG00000106397.12;ENSG00000106400.12;ENSG00000106400.12;ENSG00000106400.12		Promoter_Associated	TRUE
cg19496639_TC11	0.0130408	0.00279536	0.0020002	0.999957	chr8	22635259		OpenSea					FALSE
cg07972159_BC11	-0.0487325	0.00251946	0.00200304	0.999957	chr10	77110419		OpenSea					FALSE
cg27460717_BC21	0.155473	0.00280196	0.00200519	0.999957	chr4	136741838		OpenSea					FALSE
cg01555330_BC21	0.0966693	0.00280257	0.00200566	0.999957	chr16	57578144		OpenSea					FALSE
cg26482442_BC22	0.139775	0.00280308	0.00200604	0.999957	chr22	46672224	chr22:46673626-46673903	Shore				Gene_Associated	TRUE
cg01832266_TC11	-0.00971518	0.00252335	0.00200628	0.999957	chr21	32771748	chr21:32771142-32771830	Island	exon_1;exon_1;5UTR;TSS200;TSS200;TSS200;TSS1500;TSS1500;TSS1500;TSS1500;TSS1500;TSS1500;TSS1500;TSS1500;TSS1500;TSS1500;TSS1500;TSS1500;TSS1500;TSS1500;TSS1500	PAXBP1;PAXBP1;PAXBP1;ENSG00000159086.15;ENSG00000159086.15;ENSG00000159086.15;ENSG00000205930.11;ENSG00000205930.11;ENSG00000205930.11;ENSG00000205930.11;ENSG00000205930.11;ENSG00000205930.11;ENSG00000205930.11;ENSG00000205930.11;ENSG00000205930.11;ENSG00000205930.11;ENSG00000205930.11;ENSG00000205930.11;ENSG00000205930.11;ENSG00000205930.11;ENSG00000205930.11		Promoter_Associated	TRUE
cg14504269_BC21	0.0819902	0.00280374	0.00200654	0.999957	chr3	138940099	chr3:138935995-138936521;chr3:138937785-138940265	Island				Unclassified_Cell_type_specific	TRUE
cg18631379_TC21	-0.0745493	0.00252404	0.00200686	0.999957	chr13	37572470		OpenSea	TSS1500	ENSG00000133110.15			FALSE
cg11265874_TC21	0.0675142	0.00280999	0.00201127	0.999957	chr3	133924198	chr3:133927250-133927806	Shelf					FALSE
cg03996898_BC21	-0.184727	0.00252941	0.00201133	0.999957	chr22	19730620	chr22:19730704-19731228	Shore				Unclassified	TRUE
cg22792910_BC21	0.103967	0.00281191	0.00201273	0.999957	chr2	69782219		OpenSea					FALSE
cg15535050_TC11	-0.00449961	0.00253325	0.00201454	0.999957	chr1	230642336	chr1:230642331-230642847	Island	TSS200;TSS200;TSS200;TSS200;TSS1500;TSS1500	ENSG00000135775.14;ENSG00000135775.14;ENSG00000135775.14;ENSG00000135775.14;ENSG00000135775.14;ENSG00000135775.14		Promoter_Associated	TRUE
cg14239329_TC21	0.0178253	0.00281787	0.00201724	0.999957	chr2	202034576	chr2:202032663-202036149	Island	exon_1;5UTR;TSS1500	FZD7;FZD7;ENSG00000273209.1			FALSE
cg07035333_BC11	0.00784927	0.00281847	0.0020177	0.999957	chr21	39445637	chr21:39445376-39446047	Island	exon_1;exon_1;exon_1;exon_1;5UTR;5UTR;5UTR;TSS1500;TSS1500;TSS1500;TSS1500;TSS1500;TSS1500	LCA5L;LCA5L;LCA5L;LCA5L;LCA5L;LCA5L;LCA5L;ENSG00000185437.16;ENSG00000185437.16;ENSG00000185437.16;ENSG00000185437.16;ENSG00000185437.16;ENSG00000275523.1		Promoter_Associated	TRUE
cg01191154_TC21	-0.121893	0.00253878	0.00201915	0.999957	chr22	37197632	chr22:37198625-37199671	Shore	exon_1;exon_1;exon_2	C1QTNF6;C1QTNF6;C1QTNF6		Unclassified_Cell_type_specific	TRUE
cg07129907_BC21	-0.0265237	0.00254077	0.00202081	0.999957	chr6	30716010	chr6:30717059-30717726	Shore	TSS1500	ENSG00000196230.14			FALSE
cg03881660_BC21	0.0632003	0.00282461	0.00202234	0.999957	chr2	182277183		OpenSea					FALSE
cg04388790_BC21	0.0931633	0.00282606	0.00202344	0.999957	chr7	33504187		OpenSea	TSS1500;TSS1500	ENSG00000122507.21;ENSG00000122507.21			FALSE
cg22910815_BC21	-0.151797	0.00254395	0.00202345	0.999957	chr17	73189542	chr17:73192268-73193319	Shelf					FALSE
cg10577257_BC21	0.036553	0.00282751	0.00202454	0.999957	chr12	130444648		OpenSea					FALSE
cg05316043_BC11	-0.00905295	0.00254636	0.00202547	0.999957	chr10	81875218	chr10:81874293-81875973	Island	exon_1;5UTR;TSS200;TSS200	NRG3;NRG3;ENSG00000287358.1;ENSG00000185737.13		Unclassified_Cell_type_specific	TRUE
cg26983874_BC11	-0.0964546	0.00255355	0.00203146	0.999957	chr19	16625721	chr19:16627504-16628868	Shore	TSS1500	ENSG00000105085.11			FALSE
cg04654585_BC21	0.0283379	0.00283685	0.00203162	0.999957	chr1	66788499		OpenSea					FALSE
cg17407166_BC21	0.16754	0.00283753	0.00203213	0.999957	chr10	109426946		OpenSea					FALSE
cg11622504_TC11	-0.00854471	0.00255504	0.0020327	0.999957	chr12	5945458	chr12:5945183-5945566	Island	TSS1500;TSS200	ENSG00000047617.17;ENSG00000047617.17			FALSE
cg12080266_TC21	-0.261615	0.00255511	0.00203276	0.999957	chr21	34688341		OpenSea					FALSE
cg18639342_BC11	0.0108565	0.00284039	0.00203429	0.999957	chr2	38750614	chr2:38750393-38751542	Island	TSS1500;TSS1500	ENSG00000115875.19;ENSG00000152147.11			FALSE
cg09505476_BC21	-0.125013	0.00255795	0.00203513	0.999957	chr7	133936261		OpenSea					FALSE
cg20270245_BC21	0.0456447	0.00284261	0.00203598	0.999957	chr4	139514688		OpenSea					FALSE
cg10018524_TC21	-0.0750603	0.00255943	0.00203636	0.999957	chr19	13185605		OpenSea					FALSE
cg26145091_TC21	0.0782377	0.00284569	0.00203831	0.999957	chr22	25025441	chr22:25028006-25028263	Shelf	TSS1500	ENSG00000279548.1			FALSE
cg16915131_BC21	-0.0533002	0.00256483	0.00204087	0.999957	chr1	149907148		OpenSea					FALSE
cg06490558_BC21	-0.0456249	0.0025676	0.00204318	0.999957	chr3	158809692		OpenSea					FALSE
cg19109797_TC21	0.0641313	0.00285475	0.00204517	0.999957	chr11	34386508		OpenSea					FALSE
cg08052856_BC11	0.0162908	0.00285489	0.00204528	0.999957	chr6	30686916	chr6:30686615-30687624;chr6:30690824-30691248	Island	exon_1;5UTR;TSS1500	PPP1R18;PPP1R18;ENSG00000146112.12		Promoter_Associated	TRUE
cg06083483_BC21	0.126178	0.00285536	0.00204563	0.999957	chr17	34318987		OpenSea	TSS1500	ENSG00000108700.5			FALSE
cg00919259_BC21	-0.121735	0.00257192	0.00204678	0.999957	chr5	180876598		OpenSea					FALSE
cg03369247_TC21	-0.0354897	0.00257294	0.00204764	0.999957	chr8	20174519		OpenSea					FALSE
cg20039048_TC21	0.0651566	0.00285811	0.00204772	0.999957	chr11	8283755		OpenSea					FALSE
cg18196416_BC21	0.12065	0.00285821	0.00204779	0.999957	chr3	153286215		OpenSea				Unclassified_Cell_type_specific	TRUE
cg22871732_TC21	-0.0884968	0.00257325	0.00204789	0.999957	chr17	68777819		OpenSea				Unclassified	TRUE
cg20215257_BC21	0.163849	0.00285914	0.0020485	0.999957	chr3	155676503		OpenSea	TSS200;TSS1500;TSS1500	ENSG00000114805.18;ENSG00000114805.18;ENSG00000114805.18			FALSE
cg26682845_TC21	0.161001	0.00286378	0.00205202	0.999957	chr18	55079730		OpenSea					FALSE
cg04607261_BC11	0.0132101	0.00286503	0.00205297	0.999957	chr6	33789125	chr6:33788286-33789229	Island	exon_1;exon_1;5UTR;5UTR;TSS200;TSS1500	LEMD2;LEMD2;LEMD2;LEMD2;ENSG00000161904.12;ENSG00000161904.12			FALSE
cg10103036_BC21	-0.0639563	0.00258049	0.00205393	0.999957	chr8	91067421	chr8:91070008-91070757	Shelf	exon_2	OTUD6B-AS1			FALSE
cg19891216_TC21	-0.0163022	0.00258202	0.00205521	0.999957	chr1	18743474		OpenSea					FALSE
cg22533159_TC21	0.032751	0.00286976	0.00205655	0.999957	chr6	3393682		OpenSea					FALSE
cg01156747_TC21	-0.44795	0.00258405	0.0020569	0.999957	chr7	120659	chr7:117561-117866;chr7:120519-120758	Island					FALSE
cg13134950_TC11	0.0556255	0.0028707	0.00205726	0.999957	chr4	2433971	chr4:2430071-2430601	Shelf					FALSE
cg26823112_BC21	-0.158347	0.0025848	0.00205752	0.999957	chr11	57787593		OpenSea					FALSE
cg06685759_TC21	-0.0393506	0.00258788	0.0020601	0.999957	chr2	216328400		OpenSea					FALSE
cg26286569_BC21	-0.191839	0.00258886	0.00206091	0.999957	chr22	36336665		OpenSea					FALSE
cg24051487_TC21	0.107581	0.00287671	0.00206182	0.999957	chr20	11690951	chr20:11686874-11687349	Shelf					FALSE
cg23039189_TC21	-0.0218158	0.00259267	0.00206409	0.999957	chr11	7512797	chr11:7513323-7514496	Shore	exon_1;exon_1;exon_1;exon_1;exon_1;exon_1;TSS1500;TSS1500;TSS1500;TSS1500	SYT9-AS1;SYT9-AS1;SYT9-AS1;SYT9-AS1;SYT9-AS1;SYT9-AS1;ENSG00000166387.14;ENSG00000166387.14;ENSG00000166387.14;ENSG00000166387.14		Promoter_Associated_Cell_type_specific	TRUE
cg02852327_BC21	0.198622	0.00288083	0.00206494	0.999957	chr7	122310921	chr7:122310195-122310873	Shore	TSS1500	ENSG00000128610.12			FALSE
cg00538509_BC21	0.0636777	0.00288111	0.00206515	0.999957	chr7	152404360		OpenSea					FALSE
cg19075371_TC21	0.0498154	0.0028817	0.0020656	0.999957	chr13	100545733		OpenSea					FALSE
cg07079755_BC11	0.00836552	0.00288178	0.00206566	0.999957	chr20	64079593	chr20:64079416-64080392;chr20:64083410-64084408	Island	exon_1;TSS200;TSS200;TSS1500;TSS1500	RGS19;ENSG00000171700.14;ENSG00000171700.14;ENSG00000125510.18;ENSG00000125510.18		Promoter_Associated	TRUE
cg01058528_BC21	-0.0201179	0.0025973	0.00206795	0.999957	chr1	91610988		OpenSea					FALSE
cg10749413_TC21	-0.0320622	0.00259866	0.00206909	0.999957	chr19	1041021	chr19:1039765-1040255	Shore	TSS200;TSS200	ENSG00000064687.13;ENSG00000064687.13		Promoter_Associated	TRUE
cg14135170_TC21	0.0281541	0.00288781	0.00207023	0.999957	chr15	74359778		OpenSea	TSS200	ENSG00000140459.18			FALSE
cg14109572_TC11	-0.00489556	0.00260034	0.00207049	0.999957	chr9	111483323	chr9:111482764-111484504	Island					FALSE
cg09043491_BC21	-0.0372544	0.002601	0.00207104	0.999957	chr6	1191413		OpenSea					FALSE
cg05090186_TC21	-0.0725761	0.00260189	0.00207179	0.999957	chr1	244052141	chr1:244047732-244049607;chr1:244050095-244050317;chr1:244054972-244055236	Shore	TSS200	ENSG00000179456.12			FALSE
cg26549682_TC21	-0.0307412	0.00260327	0.00207294	0.999957	chr18	74292398	chr18:74290906-74292535	Island	TSS1500;TSS1500;TSS1500;TSS1500;TSS1500;TSS1500	ENSG00000166347.19;ENSG00000166347.19;ENSG00000166347.19;ENSG00000166347.19;ENSG00000166347.19;ENSG00000286529.1		Promoter_Associated	TRUE
cg00017203_TC21	-0.0496009	0.00260433	0.00207382	0.999957	chr8	143925865	chr8:143927192-143927967;chr8:143929421-143929977;chr8:143916102-143926154	Island	exon_31;exon_31;exon_31;exon_31;exon_31;exon_31;exon_31;exon_32;exon_31;exon_31;exon_31;exon_31;exon_33	PLEC;PLEC;PLEC;PLEC;PLEC;PLEC;PLEC;PLEC;PLEC;PLEC;PLEC;PLEC;PLEC			FALSE
cg05086021_BC21	0.0262241	0.0028939	0.00207485	0.999957	chr6	28861476	chr6:28863905-28864357	Shelf	exon_2;exon_2;exon_1	LINC01623;LINC01623;RPL13P			FALSE
cg08789630_BC21	0.0644536	0.00289475	0.00207549	0.999957	chr10	74839523		OpenSea					FALSE
cg23558966_BC21	-0.0360715	0.00260838	0.0020772	0.999957	chr2	20323186		OpenSea					FALSE
cg03641469_BC21	-0.0611019	0.00261299	0.00208105	0.999957	chr6	28862475	chr6:28863905-28864357	Shore					FALSE
cg23407475_TC21	0.117904	0.00290221	0.00208115	0.999957	chr10	73911704	chr10:73910938-73911621	Shore	exon_2;exon_5;5UTR	PLAU;C10orf55;PLAU		Promoter_Associated	TRUE
cg04528900_BC21	-0.0268613	0.00261376	0.00208169	0.999957	chr7	156968537	chr7:156968184-156968542	Island	TSS1500	ENSG00000146909.8			FALSE
cg26676701_TC21	0.0585563	0.0029034	0.00208206	0.999957	chr15	64151101	chr15:64151388-64152622	Shore	TSS1500;TSS1500;TSS1500;TSS1500;TSS1500;TSS1500	ENSG00000157734.14;ENSG00000157734.14;ENSG00000157734.14;ENSG00000157734.14;ENSG00000157734.14;ENSG00000157734.14			FALSE
cg09576074_BC21	-0.0765744	0.00261604	0.00208359	0.999957	chr16	84307721		OpenSea				Unclassified	TRUE
cg03494692_TC21	0.037759	0.00290851	0.00208593	0.999957	chr16	51464676		OpenSea					FALSE
cg06766636_TC21	-0.130153	0.00262268	0.00208914	0.999957	chr6	116277232	chr6:116279407-116280011	Shelf	exon_1;3UTR	TSPYL1;TSPYL1		Promoter_Associated_Cell_type_specific	TRUE
cg17465219_TC11	-0.0123854	0.00262361	0.00208992	0.999957	chr16	75464661	chr16:75463930-75464882	Island	exon_1;exon_1;exon_1;exon_1;5UTR;5UTR;5UTR;5UTR;exon_1;5UTR;TSS200;TSS200;TSS1500	TMEM170A;TMEM170A;TMEM170A;TMEM170A;TMEM170A;TMEM170A;TMEM170A;TMEM170A;ENSG00000261717;ENSG00000261717;ENSG00000261717.5;ENSG00000261717.5;ENSG00000166822.13		Promoter_Associated	TRUE
cg22551912_BC21	-0.0669616	0.00262524	0.00209128	0.999957	chr20	54273524		OpenSea					FALSE
cg21325760_BC11	0.0167708	0.00291735	0.00209264	0.999957	chr15	23646255		OpenSea	exon_1	MAGEL2			FALSE
cg00989765_TC11	0.0188676	0.00293117	0.00210313	0.999957	chr4	55125693	chr4:55125235-55126004	Island	TSS200;TSS1500	ENSG00000128052.10;ENSG00000128052.10			FALSE
cg08046335_BC21	-0.154725	0.00264403	0.00210697	0.999957	chr22	30970224	chr22:30968578-30969589	Shore	exon_1;exon_1;exon_1;exon_1;exon_1;exon_1;3UTR;TSS1500;TSS200;TSS1500;TSS1500;TSS1500;TSS1500;TSS1500;TSS1500;TSS1500;TSS1500	TUG1;TUG1;TUG1;TUG1;TUG1;TUG1;TUG1;ENSG00000133422.14;ENSG00000253352.10;ENSG00000253352.10;ENSG00000253352.10;ENSG00000253352.10;ENSG00000253352.10;ENSG00000253352.10;ENSG00000253352.10;ENSG00000276664.1;ENSG00000276057.1			FALSE
cg01336629_TC11	-0.112092	0.00264404	0.00210698	0.999957	chr16	833622		OpenSea				Unclassified_Cell_type_specific	TRUE
cg14181409_TC11	-0.104213	0.00264505	0.00210782	0.999957	chr17	9899543		OpenSea					FALSE
cg00437016_TC21	-0.0444369	0.00264665	0.00210916	0.999957	chr1	25458749		OpenSea	exon_6;exon_6;exon_3	MACO1;MACO1;MACO1			FALSE
cg24701742_BC21	0.107684	0.00293935	0.00210933	0.999957	chr19	49700274	chr19:49701325-49701746	Shore	TSS1500	ENSG00000169169.15			FALSE
cg17266460_BC21	-0.13184	0.0026487	0.00211087	0.999957	chr14	23320482	chr14:23321003-23322112	Shore	TSS1500;TSS1500;TSS1500;TSS1500	ENSG00000100836.11;ENSG00000100836.11;ENSG00000100836.11;ENSG00000100836.11			FALSE
cg25380021_BC21	-0.0609544	0.00264896	0.00211109	0.999957	chr5	172174678		OpenSea				Promoter_Associated	TRUE
cg04514469_BC21	0.106427	0.00294272	0.00211189	0.999957	chr14	95476329		OpenSea	TSS1500;TSS1500;TSS1500	ENSG00000176438.13;ENSG00000176438.13;ENSG00000176438.13			FALSE
cg04399289_BC21	-0.0507611	0.00265061	0.00211247	0.999957	chr16	49283351	chr16:49283086-49283352;chr16:49280126-49282632	Island	TSS1500;TSS1500	ENSG00000279249.4;ENSG00000279249.4			FALSE
cg20102368_TC11	0.00882387	0.00294574	0.00211419	0.999957	chr19	47230656	chr19:47226060-47226776;chr19:47228120-47228458;chr19:47230203-47231549	Island				Promoter_Associated	TRUE
cg20612154_TC21	-0.076823	0.00265746	0.00211819	0.999957	chr13	100398342		OpenSea					FALSE
cg20342402_BC21	-0.0763244	0.00265749	0.00211821	0.999957	chr15	45449995		OpenSea	TSS200;TSS1500	ENSG00000259354.5;ENSG00000259354.5			FALSE
cg22409268_BC21	-0.0401906	0.00265805	0.00211868	0.999957	chr17	31335111		OpenSea	TSS1500	ENSG00000196712.20			FALSE
cg23359488_BC21	-0.0345361	0.00266238	0.0021223	0.999957	chr18	70359126		OpenSea					FALSE
cg00308130_BC11	-0.0134537	0.00266271	0.00212258	0.999957	chr5	136079501	chr5:136079380-136079618;chr5:136080515-136080786	Island				Unclassified_Cell_type_specific	TRUE
cg00729380_BC21	-0.0495023	0.00266333	0.00212309	0.999957	chr21	44861768		OpenSea	exon_1	PTTG1IP			FALSE
cg23435652_BC21	-0.126473	0.00266512	0.00212459	0.999957	chr18	35934323		OpenSea	TSS200	ENSG00000265641.1			FALSE
cg14412992_TC21	-0.0776281	0.0026664	0.00212565	0.999957	chr5	126371243		OpenSea	TSS200	ENSG00000155324.10			FALSE
cg00139771_BC21	-0.0169165	0.00266643	0.00212568	0.999957	chr19	13692355		OpenSea					FALSE
cg22140136_TC11	0.0150661	0.00296099	0.00212576	0.999957	chr19	10380957	chr19:10380343-10381044	Island	TSS1500;TSS1500;TSS1500;TSS1500;TSS1500;TSS1500;TSS1500;TSS1500;TSS1500;TSS1500;TSS1500;TSS1500;TSS1500;TSS1500;TSS1500;TSS1500;TSS1500;TSS1500;TSS1500	ENSG00000105397.15;ENSG00000105397.15;ENSG00000105397.15;ENSG00000105397.15;ENSG00000105397.15;ENSG00000105397.15;ENSG00000105397.15;ENSG00000105397.15;ENSG00000105397.15;ENSG00000105397.15;ENSG00000105397.15;ENSG00000105397.15;ENSG00000105397.15;ENSG00000105397.15;ENSG00000105397.15;ENSG00000105397.15;ENSG00000105397.15;ENSG00000105397.15;ENSG00000105397.15		Promoter_Associated	TRUE
cg02535831_BC21	-0.0479151	0.00266681	0.002126	0.999957	chr10	92355153		OpenSea					FALSE
cg21821990_BC21	0.0349833	0.00296186	0.00212642	0.999957	chr11	65027977	chr11:65027515-65027890	Shore	TSS1500	ENSG00000270775.1		Promoter_Associated	TRUE
cg11787155_BC21	0.0496232	0.00296357	0.00212772	0.999957	chr1	236121381		OpenSea					FALSE
cg14283651_BC21	-0.104389	0.00267008	0.00212873	0.999957	chr9	127904207		OpenSea	exon_1	ST6GALNAC6			FALSE
cg23427859_BC11	0.00578849	0.00296979	0.00213244	0.999957	chr5	129094476	chr5:129094310-129095369	Island	TSS1500;TSS1500	ENSG00000066583.12;ENSG00000066583.12		Promoter_Associated	TRUE
cg06623985_BC21	-0.138111	0.00267833	0.00213562	0.999957	chr15	62224083	chr15:62224125-62224606	Shore	TSS1500;TSS1500	ENSG00000259697.3;ENSG00000259697.3	chr15:62224055-62224786		FALSE
cg02135122_TC21	0.151638	0.00297434	0.0021359	0.999957	chr10	74883066		OpenSea					FALSE
cg11408305_BC21	0.0822958	0.00297504	0.00213643	0.999957	chr4	3385020		OpenSea	TSS200;TSS1500;TSS1500;TSS1500;TSS1500	ENSG00000159788.20;ENSG00000159788.20;ENSG00000159788.20;ENSG00000159788.20;ENSG00000159788.20			FALSE
cg25917966_BC21	0.186795	0.00297512	0.0021365	0.999957	chr21	17784825		OpenSea			chr21:17784810-17785064		FALSE
cg27251473_TC21	-0.034323	0.00267971	0.00213677	0.999957	chr16	89292645		OpenSea					FALSE
cg09446250_TC21	0.125259	0.00297714	0.00213802	0.999957	chr11	82719307		OpenSea	TSS1500;TSS1500	ENSG00000245832.7;ENSG00000245832.7			FALSE
cg04383698_BC21	-0.0532264	0.00268156	0.00213833	0.999957	chr2	239226843		OpenSea					FALSE
cg03907757_TC21	-0.0234284	0.00268159	0.00213835	0.999957	chr7	41993557		OpenSea					FALSE
cg15045657_BC21	0.0481371	0.00297819	0.00213882	0.999957	chr10	50554290		OpenSea					FALSE
cg06353075_TC21	-0.0344389	0.00268221	0.00213887	0.999957	chr12	98635680		OpenSea					FALSE
cg05892503_BC21	0.0177374	0.00297893	0.00213939	0.999957	chr8	142670115	chr8:142669341-142670424	Island	exon_2;TSS200;TSS200;TSS200;TSS200;TSS200;TSS1500	JRK;ENSG00000234616.9;ENSG00000234616.9;ENSG00000234616.9;ENSG00000234616.9;ENSG00000167653.5;ENSG00000167653.5		Promoter_Associated	TRUE
cg22534757_TC21	0.0731235	0.00298576	0.00214458	0.999957	chr17	41615397		OpenSea					FALSE
cg21322247_BC21	-0.0472065	0.00269033	0.00214566	0.999957	chr5	37872745		OpenSea	exon_1;TSS1500	GDNF-AS1;ENSG00000248587.8			FALSE
cg08737815_TC21	-0.124795	0.00269155	0.00214667	0.999957	chr1	17055305	chr1:17053961-17054227	Shore	TSS1500;TSS1500;TSS1500	ENSG00000117118.10;ENSG00000117118.10;ENSG00000117118.10			FALSE
cg16504108_TC21	-0.0224489	0.00269545	0.00214994	0.999957	chr15	71218197	chr15:71215092-71215357	Shelf					FALSE
cg20404236_TC11	-0.00983021	0.00269746	0.00215161	0.999957	chr3	25664373	chr3:25664065-25665079	Island	exon_1;exon_1;5UTR;5UTR	TOP2B;TOP2B;TOP2B;TOP2B			FALSE
cg13733796_TC21	-0.118405	0.00269747	0.00215162	0.999957	chr3	164806342		OpenSea					FALSE
cg15432627_BC21	0.128144	0.00299528	0.0021518	0.999957	chr10	97047410	chr10:97043308-97043677	Shelf					FALSE
cg24283921_BC21	0.134163	0.00299605	0.00215239	0.999957	chr11	10455914		OpenSea	TSS1500	ENSG00000133805.16		Promoter_Associated	TRUE
cg21457368_BC21	-0.0414123	0.00270134	0.00215486	0.999957	chr22	49812777		OpenSea					FALSE
cg11513002_BC21	-0.0137372	0.00270183	0.00215527	0.999957	chr4	140753071	chr4:140755766-140757016	Shelf					FALSE
cg12379954_BC11	-0.0144858	0.00270398	0.00215706	0.999957	chr4	143351456		OpenSea	TSS1500	ENSG00000228981.3			FALSE
cg12282846_BC21	0.153535	0.00300392	0.00215837	0.999957	chr14	80336681		OpenSea					FALSE
cg19101630_TC21	0.0131599	0.00300573	0.00215975	0.999957	chr7	100611914	chr7:100611971-100613032	Shore	TSS200;TSS1500;TSS1500;TSS1500;TSS1500;TSS1500;TSS1500;TSS1500	ENSG00000106330.12;ENSG00000106330.12;ENSG00000106330.12;ENSG00000106330.12;ENSG00000106330.12;ENSG00000106330.12;ENSG00000106330.12;ENSG00000106330.12		Promoter_Associated	TRUE
cg22944823_TC11	-0.0108763	0.0027097	0.00216185	0.999957	chr17	81445659	chr17:81445444-81445763;chr17:81448466-81448757	Island	exon_10;exon_10	BAHCC1;BAHCC1		Unclassified_Cell_type_specific	TRUE
cg11353547_BC21	0.116499	0.00300853	0.00216188	0.999957	chr16	4788558		OpenSea	exon_1;exon_1;exon_1;exon_1;exon_1;5UTR;5UTR;5UTR;5UTR;TSS1500;TSS1500;TSS1500;TSS1500;TSS200;TSS1500;TSS1500	SMIM22;SMIM22;SMIM22;SMIM22;SMIM22;SMIM22;SMIM22;SMIM22;SMIM22;ENSG00000140623.14;ENSG00000140623.14;ENSG00000140623.14;ENSG00000140623.14;ENSG00000140623.14;ENSG00000140623.14;ENSG00000140623.14			FALSE
cg24457614_TC21	0.0811886	0.00301249	0.00216488	0.999957	chr2	50943946		OpenSea					FALSE
cg11227087_TC21	0.0655715	0.00301353	0.00216568	0.999957	chr3	195144989		OpenSea					FALSE
cg22823081_TC21	0.0492648	0.00301478	0.00216662	0.999957	chr12	74171067		OpenSea	exon_1	ENSG00000258320			FALSE
cg03496068_TC21	-0.0345621	0.00271544	0.00216665	0.999957	chr2	69936840		OpenSea	TSS1500	ENSG00000059728.11			FALSE
cg18147676_BC21	0.0775375	0.00301611	0.00216764	0.999957	chr3	69983918		OpenSea					FALSE
cg20955417_TC21	-0.0899111	0.00271691	0.00216788	0.999957	chr1	182085269		OpenSea	TSS1500	ENSG00000225982.1		Unclassified	TRUE
cg15724985_TC21	-0.0172695	0.0027183	0.00216904	0.999957	chr12	3105943		OpenSea					FALSE
cg06108888_TC21	-0.0854098	0.00271945	0.00217001	0.999957	chr12	106032213		OpenSea					FALSE
cg25528674_TC21	-0.0224249	0.00272006	0.00217052	0.999957	chr13	39516712		OpenSea					FALSE
cg01341040_TC11	0.0680401	0.00302031	0.00217083	0.999957	chr1	1214344	chr1:1210188-1210498;chr1:1211328-1211534;chr1:1213675-1214144;chr1:1217142-1217754	Shore	TSS200;TSS1500;TSS1500;TSS200;TSS200;TSS200;TSS200;TSS200;TSS200;TSS200;TSS200;TSS200;TSS200;TSS1500	ENSG00000186827.12;ENSG00000186827.12;ENSG00000186827.12;ENSG00000186827.12;ENSG00000186827.12;ENSG00000186827.12;ENSG00000186827.12;ENSG00000186827.12;ENSG00000186827.12;ENSG00000186827.12;ENSG00000186827.12;ENSG00000186827.12;ENSG00000186827.12;ENSG00000186827.12			FALSE
cg04460816_BC21	-0.135232	0.0027209	0.00217122	0.999957	chr19	19110763	chr19:19110387-19110766	Island	exon_8	SLC25A42		Unclassified	TRUE
cg27232360_BC21	0.116332	0.0030243	0.00217387	0.999957	chr11	45606719		OpenSea					FALSE
cg11276003_TC21	0.132344	0.00302776	0.0021765	0.999957	chr6	47293287		OpenSea					FALSE
cg18226923_TC21	-0.0373793	0.00272844	0.00217753	0.999957	chr20	53801495		OpenSea	exon_2;TSS200	ENSG00000225563;ENSG00000225563.2			FALSE
cg21212630_BC21	-0.0377108	0.00272899	0.00217798	0.999957	chr9	130395648		OpenSea					FALSE
cg11224904_BC21	-0.0869268	0.00272952	0.00217842	0.999957	chr13	41955870		OpenSea	exon_1	VWA8-AS1			FALSE
cg10108372_TC21	-0.0702647	0.00273067	0.00217939	0.999957	chr7	157018668	chr7:157017878-157021899	Island				Unclassified_Cell_type_specific	TRUE
cg09747891_TC21	-0.0199013	0.00273193	0.00218044	0.999957	chr5	33892992	chr5:33892086-33892298	Shore	TSS1500;TSS1500;TSS1500;TSS1500	ENSG00000151388.11;ENSG00000151388.11;ENSG00000151388.11;ENSG00000151388.11			FALSE
cg10237996_BC21	0.0936731	0.00303363	0.00218096	0.999957	chr5	132498404	chr5:132496663-132497202	Shore			chr5:132498301-132498562	Unclassified_Cell_type_specific	TRUE
cg12925464_TC21	-0.0560729	0.00273272	0.0021811	0.999957	chr8	101872575		OpenSea	TSS200	ENSG00000282989.1			FALSE
cg23665230_BC21	0.122962	0.00303564	0.00218249	0.999957	chr10	60736039	chr10:60733027-60733618	Shelf					FALSE
cg05862039_BC11	0.0502163	0.00303678	0.00218335	0.999957	chr2	172928151		OpenSea	TSS200;TSS200	ENSG00000091428.18;ENSG00000091428.18			FALSE
cg24872971_BC21	-0.031764	0.00273564	0.00218354	0.999957	chr8	70157213		OpenSea	TSS200;exon_11;exon_11	ENSG00000140396.13;NCOA2;NCOA2			FALSE
cg22546226_BC21	0.0116382	0.00303711	0.00218361	0.999957	chr4	112636722	chr4:112636876-112637525	Shore	exon_1;exon_1;5UTR;5UTR;TSS1500;TSS1500;TSS1500;TSS1500;TSS1500;TSS1500;TSS1500;TSS1500;TSS1500;TSS1500;TSS1500;TSS1500;TSS1500;TSS1500;TSS1500;TSS1500;TSS1500;TSS1500;TSS1500;TSS1500;TSS1500;TSS1500;TSS1500;TSS1500;TSS1500;TSS1500;TSS1500;TSS1500;TSS1500;TSS1500;TSS1500	ZGRF1;ZGRF1;ZGRF1;ZGRF1;ENSG00000174720.18;ENSG00000174720.18;ENSG00000174720.18;ENSG00000174720.18;ENSG00000174720.18;ENSG00000174720.18;ENSG00000174720.18;ENSG00000174720.18;ENSG00000174720.18;ENSG00000174720.18;ENSG00000174720.18;ENSG00000174720.18;ENSG00000174720.18;ENSG00000174720.18;ENSG00000174720.18;ENSG00000174720.18;ENSG00000174720.18;ENSG00000174720.18;ENSG00000174720.18;ENSG0000017472…			FALSE
cg08138834_BC21	0.142815	0.00304572	0.00219015	0.999957	chr19	40702627		OpenSea	exon_9;exon_9;exon_8;exon_9;exon_9;exon_8;exon_10;exon_8;exon_10;exon_9;exon_10;exon_8;exon_10;exon_10;exon_6;exon_8;exon_9;exon_10;exon_10;exon_10;exon_10;exon_8;exon_8;exon_9;exon_11;exon_9;exon_8;exon_9;exon_9;exon_10;exon_8;exon_9;exon_10;exon_11;exon_9;exon_9;exon_7;3UTR;3UTR;3UTR;3UTR;3UTR;3UTR;3UTR;3UTR	COQ8B;COQ8B;COQ8B;COQ8B;COQ8B;COQ8B;COQ8B;COQ8B;COQ8B;COQ8B;COQ8B;COQ8B;COQ8B;COQ8B;COQ8B;COQ8B;COQ8B;COQ8B;COQ8B;COQ8B;COQ8B;COQ8B;COQ8B;COQ8B;COQ8B;COQ8B;COQ8B;COQ8B;COQ8B;COQ8B;COQ8B;COQ8B;COQ8B;COQ8B;COQ8B;COQ8B;COQ8B;COQ8B;COQ8B;COQ8B;COQ8B;COQ8B;COQ8B;COQ8B;COQ8B		Gene_Associated_Cell_type_specific	TRUE
cg03403719_TC21	-0.0890526	0.00274357	0.00219018	0.999957	chr20	23354846	chr20:23349999-23351409;chr20:23356231-23356564;chr20:23357773-23358441	Shore					FALSE
cg26744460_TC21	0.16078	0.00304726	0.00219133	0.999957	chr13	111663936		OpenSea					FALSE
cg26391960_BC21	0.166665	0.00304868	0.0021924	0.999957	chr8	66112510	chr8:66113110-66113364;chr8:66113615-66113883	Shore	TSS200;TSS1500;TSS1500;TSS1500;TSS1500;TSS1500;TSS1500;TSS1500;TSS1500	ENSG00000253190.4;ENSG00000253190.4;ENSG00000253190.4;ENSG00000253190.4;ENSG00000253190.4;ENSG00000253190.4;ENSG00000253190.4;ENSG00000253190.4;ENSG00000253190.4			FALSE
cg09148176_BC21	-0.0311761	0.00274793	0.00219382	0.999957	chr4	183241181		OpenSea	TSS1500	ENSG00000251128.1			FALSE
cg00320534_BC21	0.148529	0.00305278	0.00219552	0.999957	chr10	21927718		OpenSea					FALSE
cg03138668_TC21	-0.0405813	0.00275194	0.00219719	0.999957	chr19	49441231	chr19:49441151-49441577;chr19:49442850-49443965	Island				Unclassified	TRUE
cg10378348_BC11	-0.0446617	0.0027522	0.0021974	0.999957	chr1	6184559	chr1:6179177-6180754;chr1:6180971-6181191	Shelf					FALSE
cg26258077_TC21	0.0789936	0.003056	0.00219797	0.999957	chr2	206087435	chr2:206084988-206085804	Shore	TSS1500;TSS1500	ENSG00000114933.16;ENSG00000114933.16			FALSE
cg06422467_TC21	0.0104365	0.00305878	0.00220008	0.999957	chr6	30752707		OpenSea			chr6:30752227-30752936		FALSE
cg07612978_TC21	0.0881372	0.00306248	0.0022029	0.999957	chr4	5989618		OpenSea	exon_1;exon_28	C4orf50;C4orf50			FALSE
cg22183448_TC21	-0.060542	0.0027599	0.00220385	0.999957	chr22	42087262	chr22:42090345-42091242	Shelf	exon_1;5UTR	NDUFA6;NDUFA6			FALSE
cg03113679_BC21	-0.0509306	0.00276054	0.00220438	0.999957	chr2	87648240		OpenSea					FALSE
cg20168635_BC21	-0.0133702	0.00276101	0.00220477	0.999957	chr15	83248075		OpenSea				Unclassified	TRUE
cg21483906_BC11	0.0126339	0.00306556	0.00220524	0.999957	chr3	33717378	chr3:33717714-33718419	Shore					FALSE
cg06196265_TC21	-0.226381	0.00276333	0.00220672	0.999957	chr4	6474562	chr4:6470448-6472807	Shore				Unclassified_Cell_type_specific	TRUE
cg17260474_TC21	0.135446	0.00306843	0.00220743	0.999957	chr7	19147909	chr7:19144598-19145063;chr7:19145195-19145410	Shelf					FALSE
cg08378286_BC21	0.0956486	0.003072	0.00221014	0.999957	chr5	178270399		OpenSea					FALSE
cg00215587_TC11	0.0403995	0.00307369	0.00221143	0.999957	chr15	23565696		OpenSea	exon_2;exon_1;exon_1;exon_1;exon_1;exon_1;exon_1;5UTR;5UTR;5UTR;5UTR;5UTR;TSS200;TSS200;TSS200;TSS200;TSS1500;TSS1500	ENSG00000260978;MKRN3;MKRN3;MKRN3;MKRN3;MKRN3;MKRN3;MKRN3;MKRN3;MKRN3;MKRN3;MKRN3;ENSG00000179455.10;ENSG00000179455.10;ENSG00000179455.10;ENSG00000179455.10;ENSG00000179455.10;ENSG00000179455.10			FALSE
cg21665557_TC11	0.0158271	0.00307376	0.00221148	0.999957	chr2	219562620	chr2:219562426-219562673;chr2:219563393-219563620	Island	exon_8;exon_8;exon_8;exon_8;exon_8;exon_8;TSS200	OBSL1;OBSL1;OBSL1;OBSL1;OBSL1;OBSL1;ENSG00000124006.15			FALSE
cg25463317_BC21	-0.06843	0.00277146	0.00221352	0.999957	chr6	136050397		OpenSea					FALSE
cg15389142_BC21	0.0938665	0.00307647	0.00221355	0.999957	chr19	16036767		OpenSea	TSS1500	ENSG00000267609.2			FALSE
cg26633278_TC21	-0.0402691	0.00277217	0.00221411	0.999957	chr20	44157691	chr20:44159576-44160528	Shore					FALSE
cg04177826_TC21	0.0873123	0.00307876	0.00221529	0.999957	chr22	50547252	chr22:50544141-50544565;chr22:50546543-50549712	Island	exon_1;TSS1500	KLHDC7B;ENSG00000130487.9		Unclassified_Cell_type_specific	TRUE
cg03693943_TC11	-0.0084542	0.00277385	0.00221552	0.999957	chr9	4985152	chr9:4984543-4985630	Island	exon_1;5UTR;TSS200	JAK2;JAK2;ENSG00000096968.14		Promoter_Associated	TRUE
cg24505619_TC21	0.0283104	0.00308039	0.00221653	0.999957	chr1	186295552		OpenSea	TSS1500;TSS1500;TSS1500;TSS1500;TSS1500;TSS1500	ENSG00000116690.13;ENSG00000116690.13;ENSG00000116690.13;ENSG00000116690.13;ENSG00000116690.13;ENSG00000116690.13			FALSE
cg19396390_BC21	-0.0294605	0.00277528	0.00221672	0.999957	chr7	4688111		OpenSea					FALSE
cg02754054_TC21	-0.0178161	0.00277717	0.0022183	0.999957	chr2	200350207		OpenSea	TSS1500	ENSG00000196141.14			FALSE
cg21336876_TC11	-0.0103739	0.00277835	0.00221929	0.999957	chr12	100143037	chr12:100142138-100142936	Shore	TSS200;TSS200;TSS1500;TSS200	ENSG00000111647.13;ENSG00000111647.13;ENSG00000111647.13;ENSG00000257696.1		Promoter_Associated	TRUE
cg17325500_BC21	0.0826248	0.00308514	0.00222014	0.999957	chr1	207415685		OpenSea					FALSE
cg17936433_BC21	0.0752289	0.00308595	0.00222076	0.999957	chr4	14698904		OpenSea					FALSE
cg09044785_BC21	-0.0331359	0.00278439	0.00222434	0.999957	chr20	31870831	chr20:31870104-31870909	Island	exon_1;exon_1;exon_1;exon_1;exon_1;exon_1;5UTR;5UTR;5UTR;5UTR;5UTR;5UTR;TSS200;TSS1500;TSS1500;TSS1500;TSS1500;TSS1500;TSS1500;TSS1500;TSS1500	TTLL9;TTLL9;TTLL9;TTLL9;TTLL9;TTLL9;TTLL9;TTLL9;TTLL9;TTLL9;TTLL9;TTLL9;ENSG00000149599.16;ENSG00000149599.16;ENSG00000149599.16;ENSG00000149599.16;ENSG00000149599.16;ENSG00000149599.16;ENSG00000149599.16;ENSG00000149599.16;ENSG00000149599.16		Unclassified_Cell_type_specific	TRUE
cg07879474_TC21	-0.0217517	0.00278441	0.00222436	0.999957	chr5	139684631	chr5:139680970-139681349	Shelf	TSS200	ENSG00000249526.1		Unclassified_Cell_type_specific	TRUE
cg09047525_BC21	0.192244	0.00309409	0.00222696	0.999957	chr20	15310285		OpenSea					FALSE
cg27099978_TC11	-0.00371432	0.00278824	0.00222757	0.999957	chr3	48635568	chr3:48634973-48635727	Island	TSS200;TSS200;TSS1500;TSS200;TSS200;TSS200;TSS200;TSS200;TSS200	ENSG00000225697.13;ENSG00000225697.13;ENSG00000225697.13;ENSG00000225697.13;ENSG00000225697.13;ENSG00000225697.13;ENSG00000225697.13;ENSG00000225697.13;ENSG00000225697.13		Promoter_Associated	TRUE
cg18243536_BC21	-0.0524816	0.00278882	0.00222805	0.999957	chr10	18400337		OpenSea	TSS1500;TSS1500;TSS1500;TSS1500;TSS1500;TSS1500;TSS1500	ENSG00000165995.23;ENSG00000165995.23;ENSG00000165995.23;ENSG00000165995.23;ENSG00000165995.23;ENSG00000165995.23;ENSG00000165995.23			FALSE
cg25718276_TC21	0.0172036	0.00309634	0.00222867	0.999957	chr14	105300488	chr14:105300221-105301659	Island	exon_1;exon_1;exon_1;exon_1;5UTR;TSS200;TSS200	BRF1;BRF1;BRF1;BRF1;BRF1;ENSG00000185024.18;ENSG00000179364.15		Promoter_Associated	TRUE
cg23481564_BC21	0.170288	0.00309724	0.00222936	0.999957	chr22	38201531	chr22:38201778-38202981	Shore	exon_1;TSS1500;TSS1500;TSS1500;TSS1500;TSS1500;TSS1500	MAFF;ENSG00000185022.12;ENSG00000185022.12;ENSG00000185022.12;ENSG00000185022.12;ENSG00000185022.12;ENSG00000185022.12			FALSE
cg23235984_BC21	0.0234311	0.00309803	0.00222996	0.999957	chr5	127197541		OpenSea					FALSE
cg16978654_BC21	0.059472	0.00309892	0.00223063	0.999957	chr10	96679799		OpenSea					FALSE
cg24451742_TC21	0.0296722	0.00310063	0.00223194	0.999957	chr19	11200879	chr19:11196819-11198033;chr19:11201895-11202109	Shore					FALSE
cg11848967_TC21	0.122741	0.00310074	0.00223202	0.999957	chr5	77935780		OpenSea					FALSE
cg08960122_TC21	0.0809792	0.00310114	0.00223232	0.999957	chr2	162196792		OpenSea					FALSE
cg00473531_BC21	0.127532	0.00310174	0.00223278	0.999957	chr17	44766430		OpenSea				Unclassified_Cell_type_specific	TRUE
cg03474926_TC21	-0.0724026	0.0027948	0.00223306	0.999957	chr9	133148020	chr9:133144321-133144747;chr9:133148836-133149725	Shore					FALSE
cg16436909_TC21	0.13087	0.00310273	0.00223353	0.999957	chr19	10250616	chr19:10252095-10252708	Shore	TSS1500;TSS1500;TSS1500;TSS1500;TSS1500	ENSG00000105364.14;ENSG00000105364.14;ENSG00000105364.14;ENSG00000105364.14;ENSG00000105364.14			FALSE
cg05070542_TC21	-0.108164	0.00280026	0.00223764	0.999957	chr3	69201017		OpenSea	TSS200;TSS200;TSS1500	ENSG00000114541.15;ENSG00000114541.15;ENSG00000114541.15			FALSE
cg15942206_BC21	-0.0167289	0.00280099	0.00223825	0.999957	chr8	141172437	chr8:141173333-141173668	Shore	TSS1500	ENSG00000105339.11	chr8:141172343-141172764		FALSE
cg08409695_TC21	-0.0255672	0.00280169	0.00223883	0.999957	chr5	135989915		OpenSea					FALSE
cg10361998_BC21	0.137802	0.00311101	0.00223984	0.999957	chr6	134318316	chr6:134317659-134317883	Shore	TSS1500;TSS1500;TSS1500;TSS1500	ENSG00000118515.12;ENSG00000118515.12;ENSG00000118515.12;ENSG00000118515.12			FALSE
[truncated: 90,937 more rows]
