# Supplementary material
Source: Research Square preprint supplement (doi:10.21203/rs.3.rs-9956001/v1)
Supplement: Supplementary file 5 [file 50a7bc54f7b1e9e6207125db.xlsx]

## Sheet: S11 - Column Description
Supplementary Table S11: Column Description
Column Name	Description
Probe_ID	Probe IDs from Illumina EPIC array used in the Pai et al dataset (distinct from EPICv2 used in the ONS dataset).
Gene_Name	Gene symbol (e.g. PTPRN) taken from Gencode version 47 gene annotation.
P_value	P-value from the two-sample t-test comparing discriminant scores when LDA was performed using residualised gene expression and methylation values after adjusting for age and sex.
Expression_Loading	Linear discriminant loading coefficient representing the contribution of gene expression to sample separation along the discriminant axis. Larger absolute values indicate greater contribution of gene expression to group discrimination.
Methylation_Loading	Linear discriminant loading coefficient representing the contribution of DNA methylation to sample separation along the discriminant axis. Larger absolute values indicate greater contribution of methylation to group discrimination.

## Sheet: S11 - Pai et.al LDA
Supplementary Table S11: Linear Discriminant Analysis (LDA) Results of Pai et.al. 2019, Using Correlated Probes in Adolescent ONS Dataset
Probe_ID	Gene_Name	P_value	Expression_Loading	Methylation_Loading
cg01460604	LRRC17	0.0190604	-3.17965	-60.0277
cg07921818	RAB40B	0.0320162	4.46258	85.4166
cg25516529	PTPRN	0.0435912	-7.46121	-17.477
cg03545227	PTPRN	0.0471312	-5.86875	34.0388
cg20671534	PTPRN	0.0538252	-7.45698	20.4676
cg20176194	PTPRN	0.0541432	-7.84987	17.1733
cg06971096	PTPRN	0.0616447	-4.61243	77.375
cg24049326	SIRT7	0.0630073	-2.58515	73.5963
cg08267319	SIRT7	0.0753415	1.72942	73.1464
cg01949993	LAMC2	0.151335	1.82405	-81.0834
cg03000006	MYRIP	0.162067	-1.50325	43.7996
cg06978680	STEAP2	0.22965	3.08643	9.97442
cg16293131	SIRT7	0.287351	-3.63058	203.19
cg00696930	LAMC2	0.314309	3.35362	12.9833
cg02767663	LAMC2	0.339246	3.96622	6.90457
cg14281592	ANGPTL2	0.356912	-0.767193	28.0788
cg05193613	ANGPTL2	0.374141	-1.18962	43.191
cg07544232	LAMC2	0.432422	3.47975	22.6253
cg12552165	LAMC2	0.437933	3.09127	-2.78125
cg23696949	LAMC2	0.44065	3.78254	7.03228
