# Supplementary material
Source: Research Square preprint supplement (doi:10.21203/rs.3.rs-9956001/v1)
Supplement: Supplementary file 6 [file 76849fe8ba632e53a621e493.xlsx]

## Sheet: S12 - Column Description
Supplementary Table S12: Column Description
Column Name	Description
Probe_ID	Probe IDs from Illumina EPIC array used in the Pai et al dataset (distinct from EPICv2 used in the ONS dataset).
Gene_Name	Gene symbol (e.g. PTPRN) taken from Gencode version 47 gene annotation.
MANOVA_P_value	P-value from multivariate analysis of variance (MANOVA) testing whether the joint distribution of gene expression and DNA methylation differs between schizophrenia and control samples after adjusting for age and sex. Significance was assessed using Wilks’ lambda.
Model_Comparison_P_value	P-value from comparison of reduced and full MANOVA models testing whether inclusion of diagnosis significantly improved model fit beyond covariates alone.

## Sheet: S12 - Pai et.al. MANOVA
Supplementary Table S12: MANOVA Results of Pai et.al. 2019, Using Correlated Probes in Adolescent ONS Dataset
probe	Gene_Name	MANOVA_P_value	Model_Comparison_P_value
cg03545227	PTPRN	0.0655811	0.0867768
cg20176194	PTPRN	0.0895181	0.11972
cg25516529	PTPRN	0.0904416	0.119398
cg20671534	PTPRN	0.0672914	0.090276
cg06971096	PTPRN	0.0660508	0.0859688
cg08267319	SIRT7	0.0919146	0.107572
cg07921818	RAB40B	0.12711	0.145461
cg01460604	LRRC17	0.199125	0.216303
cg24049326	SIRT7	0.258505	0.299816
cg03000006	MYRIP	0.339697	0.394479
cg01949993	LAMC2	0.396391	0.429425
cg07544232	LAMC2	0.655248	0.67406
cg12552165	LAMC2	0.6589	0.681867
cg23696949	LAMC2	0.628644	0.651185
cg02767663	LAMC2	0.575628	0.585386
cg00696930	LAMC2	0.504472	0.520786
cg16293131	SIRT7	0.667303	0.729438
cg06978680	STEAP2	0.567831	0.535674
cg05193613	ANGPTL2	0.722284	0.712245
cg14281592	ANGPTL2	0.779235	0.715945
