# Supplementary material
Source: Research Square preprint supplement (doi:10.21203/rs.3.rs-9956001/v1)
Supplement: Supplementary file 7 [file a27c0ca97c208b02ff087cab.xlsx]

## Sheet: S3 - Column Description
Supplementary Table S3: Column Description
Column Name	Description
Gene_Name	Gene symbol (e.g. PTPRN) taken from Gencode version 47 gene annotation.
Ensembl_Gene_ID	ENSEMBL gene identifier from Gencode version 47 gene annotation.
Gene_Type	Gene biotype (e.g. protein-coding).
Base_Mean	Mean normalised read count across all samples.
Log2_Fold_Change	Log₂ fold change between SCZ and Control.
LFC_SE	Standard error of the log₂ fold change.
Wald_Stat	Wald test statistic.
P_value	Unadjusted p-value for differential expression.
FDR	Benjamini–Hochberg false discovery rate adjusted p-value

## Sheet: S3 - DEG Results
Supplementary Table S3: Differential Expression Analysis Between Schizophrenia and Control Results
Gene_Name	Ensembl_Gene_ID	Gene_Type	Base_Mean	Log2_Fold_Change	LFC_SE	Wald_Stat	P_value	FDR
SLITRK6	ENSG00000184564.11	protein_coding	47.0701	3.90943	0.646227	6.04963	1.45179e-09	1.97399e-05
LRRC17	ENSG00000128606.13	protein_coding	55.5928	1.90148	0.326146	5.83015	5.5378e-09	3.76487e-05
TRIM6	ENSG00000121236.21	protein_coding	225.539	-0.813742	0.154426	-5.26946	1.36823e-07	0.000620125
PTPRN	ENSG00000054356.14	protein_coding	232.094	-1.96432	0.397284	-4.94438	7.63872e-07	0.00259659
STEAP1	ENSG00000164647.9	protein_coding	593.884	-0.953577	0.202382	-4.71178	2.45564e-06	0.00667787
ZNF91	ENSG00000167232.14	protein_coding	798.789	0.370756	0.0808247	4.58717	4.49299e-06	0.0101819
MYRIP	ENSG00000170011.14	protein_coding	25.5753	1.52443	0.348424	4.37523	1.21306e-05	0.0235627
ANGPTL2	ENSG00000136859.10	protein_coding	850.959	-0.536397	0.123636	-4.3385	1.43456e-05	0.0243822
KLHL38	ENSG00000175946.9	protein_coding	35.7125	-1.33295	0.32836	-4.05942	4.91939e-05	0.074321
SERPINI1	ENSG00000163536.13	protein_coding	37.2446	1.15611	0.288819	4.0029	6.257e-05	0.080374
LAMC2	ENSG00000058085.15	protein_coding	3415.9	-2.82308	0.706867	-3.9938	6.50228e-05	0.080374
RAB40B	ENSG00000141542.11	protein_coding	535.598	0.344696	0.0877223	3.9294	8.51592e-05	0.0946673
SIRT7	ENSG00000187531.14	protein_coding	390.555	0.229013	0.0590334	3.87937	0.000104726	0.0946673
DENND2C	ENSG00000175984.16	protein_coding	321.594	0.454893	0.117266	3.87916	0.00010482	0.0946673
STEAP2	ENSG00000157214.14	protein_coding	944.743	-0.705548	0.182279	-3.8707	0.000108524	0.0946673
EPB41L4A	ENSG00000129595.14	protein_coding	15.0321	3.355	0.868199	3.86432	0.000111398	0.0946673
OVCH2	ENSG00000183378.13	protein_coding	21.3057	2.22416	0.58547	3.79893	0.000145321	0.105261
GNB4	ENSG00000114450.11	protein_coding	11851.9	-0.155885	0.0410484	-3.79759	0.000146107	0.105261
IRAK3	ENSG00000090376.11	protein_coding	388.375	-0.848592	0.223939	-3.78939	0.000151018	0.105261
CCN4	ENSG00000104415.14	protein_coding	1470.93	-1.18195	0.312423	-3.78319	0.00015483	0.105261
DNM1	ENSG00000106976.22	protein_coding	1262.67	-0.625828	0.166958	-3.74841	0.000177961	0.115225
C8orf34	ENSG00000165084.16	protein_coding	183.361	1.21409	0.326818	3.71488	0.000203302	0.12565
NTRK2	ENSG00000148053.18	protein_coding	50.1531	1.20305	0.326071	3.68953	0.000224666	0.132817
DIO2	ENSG00000211448.14	protein_coding	73.6937	1.66728	0.453886	3.67334	0.000239398	0.135629
HBEGF	ENSG00000113070.8	protein_coding	705.276	0.556102	0.152335	3.65052	0.000261705	0.142336
PPME1	ENSG00000214517.10	protein_coding	4155.2	0.448103	0.124888	3.58805	0.000333156	0.173799
RICTOR	ENSG00000164327.14	protein_coding	3746.86	-0.144987	0.0405121	-3.57884	0.000345118	0.173799
TRIM21	ENSG00000132109.10	protein_coding	880.54	-0.232961	0.0653167	-3.56664	0.000361588	0.17559
NDUFC1	ENSG00000109390.13	protein_coding	1522.96	0.270178	0.0768585	3.51526	0.000439327	0.203063
CDH4	ENSG00000179242.16	protein_coding	477.059	-1.1087	0.316567	-3.50224	0.000461355	0.203063
BEX2	ENSG00000133134.12	protein_coding	8.76326	-1.29788	0.372987	-3.47969	0.000502002	0.203063
MEIS2	ENSG00000134138.22	protein_coding	486.195	0.484732	0.139446	3.47612	0.000508721	0.203063
MT-ATP6	ENSG00000198899.2	protein_coding	1656.55	0.461236	0.133173	3.46344	0.000533322	0.203063
TMT1B	ENSG00000170439.8	protein_coding	67.9304	1.12726	0.325529	3.46286	0.000534461	0.203063
ADGRL3	ENSG00000150471.17	protein_coding	36.8061	2.72646	0.789056	3.45535	0.000549589	0.203063
JAK2	ENSG00000096968.14	protein_coding	1116.39	-0.250598	0.0726048	-3.45154	0.000557394	0.203063
DMD	ENSG00000198947.18	protein_coding	989.363	0.578758	0.167968	3.44565	0.000569688	0.203063
SAMD5	ENSG00000203727.4	protein_coding	156.99	1.35405	0.39361	3.44009	0.000581517	0.203063
NIBAN1	ENSG00000135842.17	protein_coding	6710.48	-0.720961	0.209602	-3.43966	0.000582441	0.203063
RAB11FIP3	ENSG00000090565.17	protein_coding	2466.93	0.205032	0.0597501	3.4315	0.000600264	0.204045
ITPRIPL1	ENSG00000198885.10	protein_coding	79.2815	-1.01932	0.301299	-3.38309	0.000716744	0.235015
PADI2	ENSG00000117115.13	protein_coding	76.84	1.23085	0.364226	3.37935	0.000726574	0.235015
TMOD1	ENSG00000136842.14	protein_coding	12.6786	1.41578	0.419724	3.37312	0.000743226	0.235015
RPGR	ENSG00000156313.15	protein_coding	219.946	-0.314231	0.0935043	-3.3606	0.000777724	0.235491
CLDN1	ENSG00000163347.6	protein_coding	289.034	1.14858	0.342113	3.3573	0.000787069	0.235491
MBOAT2	ENSG00000143797.12	protein_coding	2480.45	-0.320392	0.0956243	-3.35053	0.000806567	0.235491
TRIM58	ENSG00000162722.9	protein_coding	309.164	3.47645	1.03837	3.34799	0.00081401	0.235491
LRPAP1	ENSG00000163956.13	protein_coding	3130	0.244301	0.0734407	3.32651	0.00087941	0.249111
BET1L	ENSG00000177951.18	protein_coding	4260.8	0.19323	0.0585131	3.30234	0.000958831	0.260014
FCGBP	ENSG00000275395.7	protein_coding	11.6394	2.3671	0.717219	3.30039	0.000965519	0.260014
CAB39	ENSG00000135932.12	protein_coding	5874.64	-0.193401	0.0586497	-3.29757	0.000975269	0.260014
GPLD1	ENSG00000112293.15	protein_coding	41.3645	0.863896	0.262933	3.28561	0.0010176	0.266084
PDSS2	ENSG00000164494.12	protein_coding	1036.14	-0.23916	0.0729172	-3.27989	0.00103847	0.266417
HSPBAP1	ENSG00000169087.11	protein_coding	134.707	-0.383344	0.117132	-3.27276	0.00106503	0.268172
ICAM1	ENSG00000090339.9	protein_coding	948.531	-0.884787	0.271186	-3.26265	0.00110375	0.268768
ADAM23	ENSG00000114948.13	protein_coding	646.258	1.18945	0.364657	3.26184	0.00110693	0.268768
C9orf50	ENSG00000179058.8	protein_coding	7.6799	-1.51621	0.466404	-3.25085	0.0011506	0.268849
CDH10	ENSG00000040731.10	protein_coding	24.8502	2.56783	0.790248	3.2494	0.0011565	0.268849
UBE2D3	ENSG00000109332.20	protein_coding	17076.2	-0.102962	0.03174	-3.24393	0.00117895	0.268849
LPAR3	ENSG00000171517.6	protein_coding	45.0891	-1.68771	0.52179	-3.23446	0.00121874	0.268849
SLC1A2	ENSG00000110436.13	protein_coding	28.5821	-1.09182	0.33762	-3.23387	0.00122124	0.268849
SH3BP5	ENSG00000131370.16	protein_coding	1099.34	0.518637	0.160431	3.23278	0.00122591	0.268849
DCHS1	ENSG00000166341.9	protein_coding	951.151	-1.13046	0.350418	-3.22603	0.00125519	0.269759
KIT	ENSG00000157404.17	protein_coding	403.77	1.08508	0.336974	3.22006	0.00128163	0.269759
PRSS23	ENSG00000150687.12	protein_coding	31072.4	0.432766	0.134568	3.21595	0.00130013	0.269759
MAPK1	ENSG00000100030.15	protein_coding	13332.6	-0.0576982	0.0179527	-3.21391	0.00130941	0.269759
F3	ENSG00000117525.14	protein_coding	2307.21	0.949149	0.29593	3.20734	0.00133968	0.271876
OR2W3	ENSG00000238243.3	protein_coding	25.4578	4.15956	1.29968	3.20046	0.00137207	0.274354
NUDT4	ENSG00000173598.14	protein_coding	4351.6	-0.266522	0.083489	-3.1923	0.00141145	0.278137
SCMH1	ENSG00000010803.17	protein_coding	2002.88	-0.165244	0.0519408	-3.18139	0.00146572	0.282538
ALPL	ENSG00000162551.14	protein_coding	60.3606	1.98841	0.626128	3.17573	0.00149459	0.282538
C5orf46	ENSG00000178776.5	protein_coding	30.3084	1.87858	0.591598	3.17544	0.00149612	0.282538
FAM219A	ENSG00000164970.15	protein_coding	1743.81	0.18522	0.0586213	3.15961	0.0015798	0.294253
GLUL	ENSG00000135821.20	protein_coding	10629.6	-0.30861	0.097889	-3.15265	0.00161795	0.294355
KL	ENSG00000133116.8	protein_coding	184.628	1.33838	0.424664	3.15163	0.00162364	0.294355
TAP2	ENSG00000204267.19	protein_coding	1135.54	-0.427549	0.136453	-3.13332	0.00172841	0.306355
LONRF2	ENSG00000170500.13	protein_coding	40.8668	1.20056	0.383293	3.13222	0.00173489	0.306355
MARCHF10	ENSG00000173838.12	protein_coding	44.4408	0.984738	0.314791	3.12823	0.00175864	0.306566
EDIL3	ENSG00000164176.13	protein_coding	10318.2	0.908098	0.291773	3.11234	0.0018561	0.318239
SEC14L2	ENSG00000100003.18	protein_coding	1105.04	0.410758	0.13222	3.10662	0.00189241	0.318239
WFDC1	ENSG00000103175.11	protein_coding	20.4224	2.07705	0.668702	3.10609	0.00189581	0.318239
RXYLT1	ENSG00000118600.13	protein_coding	691.434	-0.23985	0.0773346	-3.10146	0.00192571	0.318291
COL6A2	ENSG00000142173.17	protein_coding	73017	-0.303403	0.097996	-3.09607	0.00196103	0.318291
CCDC81	ENSG00000149201.10	protein_coding	191.269	1.11007	0.358635	3.09527	0.00196635	0.318291
TTC29	ENSG00000137473.19	protein_coding	5.17632	-2.35763	0.764635	-3.08334	0.00204693	0.325839
KRAS	ENSG00000133703.14	protein_coding	5914.76	-0.154312	0.0500811	-3.08124	0.00206138	0.325839
GPC4	ENSG00000076716.9	protein_coding	6.75056	2.87584	0.93436	3.07787	0.00208487	0.325839
NDUFA1	ENSG00000125356.7	protein_coding	1167.29	0.253239	0.0823878	3.07374	0.00211394	0.326627
MAT2B	ENSG00000038274.18	protein_coding	4253.87	-0.168797	0.0550233	-3.06774	0.00215683	0.32951
LRRC24	ENSG00000254402.7	protein_coding	109.816	0.527723	0.172525	3.05882	0.00222212	0.335712
PCDH10	ENSG00000138650.9	protein_coding	2620.37	1.28598	0.421337	3.05214	0.00227219	0.336007
ZBTB18	ENSG00000179456.12	protein_coding	2649.19	0.262859	0.0861277	3.05196	0.00227349	0.336007
SERPINB7	ENSG00000166396.13	protein_coding	1115.92	-0.796291	0.261628	-3.0436	0.00233762	0.341771
TMEM119	ENSG00000183160.9	protein_coding	9026.81	-0.840464	0.277465	-3.02909	0.00245295	0.354817
DAW1	ENSG00000123977.10	protein_coding	77.456	1.53446	0.50792	3.02107	0.0025188	0.355779
PCBP2	ENSG00000197111.16	protein_coding	11413.2	-0.126286	0.0418262	-3.01931	0.0025335	0.355779
ABCC4	ENSG00000125257.16	protein_coding	2781.9	-0.173578	0.0575025	-3.01862	0.00253926	0.355779
HPF1	ENSG00000056050.7	protein_coding	753.001	-0.235115	0.077965	-3.01565	0.00256427	0.355779
ARPIN	ENSG00000242498.8	protein_coding	1642.06	-0.26746	0.0888487	-3.01029	0.00260998	0.358464
IL21R	ENSG00000103522.17	protein_coding	17.3152	1.62839	0.543025	2.99875	0.00271093	0.362512
ITPR1	ENSG00000150995.21	protein_coding	823.758	0.776909	0.259324	2.99591	0.00273631	0.362512
KCTD16	ENSG00000183775.11	protein_coding	991.528	0.923765	0.3084	2.99535	0.00274134	0.362512
MT-ND4	ENSG00000198886.2	protein_coding	7765.08	0.381214	0.127291	2.99482	0.0027461	0.362512
POTEE	ENSG00000188219.16	protein_coding	65.3051	0.479245	0.160547	2.98507	0.00283516	0.368714
PGPEP1	ENSG00000130517.14	protein_coding	2814.37	0.225032	0.0754837	2.9812	0.00287119	0.368714
L1CAM	ENSG00000198910.14	protein_coding	562.248	1.0089	0.338742	2.97837	0.00289788	0.368714
RNF141	ENSG00000110315.7	protein_coding	4571.85	0.342074	0.114868	2.97798	0.00290155	0.368714
PRRX1	ENSG00000116132.12	protein_coding	28120.7	-0.521713	0.175451	-2.97355	0.00294372	0.370609
AARD	ENSG00000205002.4	protein_coding	11.1179	-2.55644	0.861881	-2.96612	0.00301581	0.376202
XK	ENSG00000047597.7	protein_coding	33.3669	0.905602	0.306657	2.95314	0.00314556	0.380264
COL6A1	ENSG00000142156.16	protein_coding	73926.6	-0.353936	0.120067	-2.94782	0.00320027	0.380264
RPUSD4	ENSG00000165526.9	protein_coding	1003	-0.120448	0.0408616	-2.9477	0.00320149	0.380264
ABCB1	ENSG00000085563.15	protein_coding	35.4809	1.65829	0.562635	2.94737	0.00320494	0.380264
PGAP2	ENSG00000148985.20	protein_coding	570.308	-0.171294	0.05817	-2.94471	0.00323259	0.380264
JOSD2	ENSG00000161677.12	protein_coding	1626.85	0.135393	0.0460142	2.94242	0.00325659	0.380264
ASPHD2	ENSG00000128203.7	protein_coding	185.18	-0.561509	0.190856	-2.94206	0.00326036	0.380264
MZF1	ENSG00000099326.9	protein_coding	513.405	0.243526	0.0828771	2.93839	0.00329917	0.380264
RAC2	ENSG00000128340.16	protein_coding	533.346	-1.20463	0.409975	-2.93831	0.00330008	0.380264
HAPLN1	ENSG00000145681.11	protein_coding	261.252	3.21455	1.09749	2.929	0.00340056	0.38855
ATF1	ENSG00000123268.9	protein_coding	1465.57	-0.214713	0.0735368	-2.91981	0.00350249	0.389277
MT-ND2	ENSG00000198763.3	protein_coding	1234.81	0.467989	0.160333	2.91887	0.00351307	0.389277
MT-ND4L	ENSG00000212907.2	protein_coding	1186.98	0.415813	0.142484	2.91832	0.00351926	0.389277
KCNG1	ENSG00000026559.14	protein_coding	952.5	-0.815629	0.279504	-2.91812	0.00352144	0.389277
ENTPD7	ENSG00000198018.7	protein_coding	9922.51	0.528686	0.181659	2.91033	0.00361049	0.395902
PLIN2	ENSG00000147872.10	protein_coding	1840.82	-0.257422	0.0887126	-2.90176	0.00371077	0.403216
TCAF2	ENSG00000170379.21	protein_coding	152.218	0.615002	0.212099	2.89959	0.0037365	0.403216
CRYBG1	ENSG00000112297.18	protein_coding	4357.13	-0.438453	0.151593	-2.89231	0.00382421	0.40811
DIAPH2	ENSG00000147202.19	protein_coding	1917.33	-0.220963	0.0764352	-2.89086	0.00384188	0.40811
KIAA1191	ENSG00000122203.15	protein_coding	5798.06	0.125936	0.043661	2.8844	0.00392162	0.410429
RPF1	ENSG00000117133.11	protein_coding	1320.56	-0.194091	0.0672944	-2.8842	0.00392408	0.410429
KLC1	ENSG00000126214.22	protein_coding	1714.01	0.233819	0.0812419	2.87806	0.00400133	0.414066
CD151	ENSG00000177697.19	protein_coding	28362.1	0.210064	0.0730248	2.87661	0.00401976	0.414066
RABGEF1	ENSG00000154710.18	protein_coding	95.3168	0.31662	0.110353	2.86917	0.00411551	0.420616
CPEB1	ENSG00000214575.10	protein_coding	54.2481	-0.905221	0.31575	-2.86689	0.00414522	0.420616
RPF2	ENSG00000197498.13	protein_coding	1797.27	-0.263006	0.0918221	-2.8643	0.00417931	0.420934
RPP25	ENSG00000178718.7	protein_coding	357.752	-0.81435	0.284842	-2.85895	0.0042504	0.423699
CIDEB	ENSG00000136305.12	protein_coding	29.9744	-0.930606	0.325664	-2.85756	0.00426909	0.423699
SELENOO	ENSG00000073169.15	protein_coding	1011.02	0.179319	0.0629149	2.85018	0.00436944	0.427173
ROBO3	ENSG00000154134.15	protein_coding	565.618	-0.549575	0.193081	-2.84635	0.00442234	0.427173
YIPF5	ENSG00000145817.17	protein_coding	9218.98	0.159145	0.0559522	2.8443	0.00445087	0.427173
GALNT18	ENSG00000110328.6	protein_coding	267.29	0.716967	0.252137	2.84356	0.00446129	0.427173
SLC35F5	ENSG00000115084.15	protein_coding	10374.3	-0.21312	0.0749489	-2.84354	0.00446154	0.427173
ARSG	ENSG00000141337.13	protein_coding	259.513	0.399806	0.140711	2.84133	0.00449259	0.427173
DPH6	ENSG00000134146.12	protein_coding	335.144	-0.280522	0.0989381	-2.83533	0.00457788	0.427832
FAM167A	ENSG00000154319.16	protein_coding	2953.67	-0.602146	0.21274	-2.83043	0.0046485	0.427832
GSAP	ENSG00000186088.16	protein_coding	278.87	-0.556609	0.196842	-2.82769	0.00468847	0.427832
DTX3L	ENSG00000163840.10	protein_coding	4203.07	-0.249305	0.0882648	-2.82451	0.00473526	0.427832
EIF3CL	ENSG00000205609.13	protein_coding	41.6179	0.584056	0.206794	2.82434	0.00473787	0.427832
SYT5	ENSG00000129990.15	protein_coding	13.852	2.21225	0.784025	2.82166	0.00477758	0.427832
PALMD	ENSG00000099260.12	protein_coding	68.0857	1.41534	0.502682	2.81559	0.00486885	0.427832
STEAP3	ENSG00000115107.20	protein_coding	3189.09	-0.38149	0.135497	-2.81548	0.00487045	0.427832
PRR7	ENSG00000131188.12	protein_coding	372.121	0.335786	0.119317	2.81423	0.00488947	0.427832
CPSF3	ENSG00000119203.14	protein_coding	2539.8	-0.190367	0.0676573	-2.8137	0.00489751	0.427832
SNRK	ENSG00000163788.14	protein_coding	1570.69	-0.136884	0.0486893	-2.81139	0.00493285	0.427832
SGSM3	ENSG00000100359.21	protein_coding	9.3097	-1.05438	0.375537	-2.80767	0.0049902	0.427832
CPZ	ENSG00000109625.19	protein_coding	189.452	1.17785	0.419564	2.80731	0.00499567	0.427832
SPATA2L	ENSG00000158792.16	protein_coding	467.525	0.22893	0.0815785	2.80625	0.00501216	0.427832
UCHL1	ENSG00000154277.13	protein_coding	5088.05	-0.954013	0.34006	-2.80543	0.00502497	0.427832
COL4A6	ENSG00000197565.17	protein_coding	1202.89	0.569901	0.203376	2.80221	0.00507544	0.427832
LAG3	ENSG00000089692.9	protein_coding	33.7162	0.636752	0.227385	2.80033	0.00510504	0.427832
KLRD1	ENSG00000134539.17	protein_coding	3.50354	3.39054	1.21092	2.79996	0.00511097	0.427832
SIGLEC15	ENSG00000197046.12	protein_coding	18.3028	-1.59999	0.572403	-2.79521	0.00518656	0.427832
PLPP4	ENSG00000203805.11	protein_coding	1140.83	0.544475	0.195065	2.79125	0.00525052	0.427832
IGFBP3	ENSG00000146674.16	protein_coding	20349.3	0.967253	0.346652	2.79027	0.00526642	0.427832
TACC2	ENSG00000138162.19	protein_coding	1207.81	-0.193802	0.0694922	-2.78884	0.00528978	0.427832
KIAA1671	ENSG00000197077.14	protein_coding	346.461	1.51259	0.542797	2.78667	0.00532533	0.427832
FAM199X	ENSG00000123575.9	protein_coding	3546.13	0.119929	0.0430545	2.78553	0.00534404	0.427832
RABAC1	ENSG00000105404.11	protein_coding	700.571	0.248146	0.089111	2.78469	0.00535791	0.427832
SDF4	ENSG00000078808.20	protein_coding	11080.4	0.181173	0.0650763	2.78401	0.0053691	0.427832
PPP2R2B	ENSG00000156475.19	protein_coding	10.5786	2.69691	0.968784	2.7838	0.00537254	0.427832
RABGAP1L	ENSG00000152061.24	protein_coding	1881.54	-0.157916	0.0567522	-2.78255	0.00539328	0.427832
CSF1	ENSG00000184371.14	protein_coding	1980.56	-0.282678	0.101648	-2.78096	0.00541981	0.427832
RHOJ	ENSG00000126785.13	protein_coding	1281.54	0.687569	0.247591	2.77703	0.00548574	0.427832
MME	ENSG00000196549.13	protein_coding	1715.15	-0.630212	0.227038	-2.7758	0.00550661	0.427832
ARG2	ENSG00000081181.8	protein_coding	119.054	-0.528528	0.19057	-2.77341	0.00554728	0.427832
TRIM59	ENSG00000213186.8	protein_coding	3266.65	-0.382466	0.137924	-2.77301	0.00555398	0.427832
FAM136A	ENSG00000035141.10	protein_coding	1824.27	-0.247717	0.0895093	-2.7675	0.00564873	0.427832
ETV4	ENSG00000175832.13	protein_coding	221.41	-0.831851	0.300922	-2.76434	0.00570383	0.427832
TRIM68	ENSG00000167333.13	protein_coding	624.723	-0.210044	0.076012	-2.7633	0.00572194	0.427832
PSG4	ENSG00000243137.8	protein_coding	4144.65	3.26832	1.18354	2.76148	0.00575408	0.427832
ZNF511	ENSG00000198546.15	protein_coding	187.728	-0.288983	0.104669	-2.76093	0.00576364	0.427832
ARAP3	ENSG00000120318.16	protein_coding	920.58	-0.418891	0.151971	-2.75639	0.00584437	0.427832
CCNL2	ENSG00000221978.13	protein_coding	1263.34	0.23558	0.0854879	2.75571	0.00585652	0.427832
MLPH	ENSG00000115648.14	protein_coding	412.887	-0.867235	0.314706	-2.7557	0.0058566	0.427832
SERF1A	ENSG00000172058.16	protein_coding	7.95049	-3.16143	1.14725	-2.75566	0.00585736	0.427832
C1orf56	ENSG00000143443.10	protein_coding	190.314	-0.226867	0.0824228	-2.75248	0.00591465	0.427832
MBIP	ENSG00000151332.20	protein_coding	765.407	-0.183779	0.0668261	-2.7501	0.00595765	0.427832
PPP1R9A	ENSG00000158528.12	protein_coding	78.3382	1.17646	0.427877	2.74952	0.00596824	0.427832
RDH5	ENSG00000135437.10	protein_coding	145.588	0.540895	0.196871	2.74746	0.0060058	0.427832
SLC25A1	ENSG00000100075.10	protein_coding	6787.73	0.205713	0.0749448	2.74486	0.00605374	0.427832
ATG5	ENSG00000057663.16	protein_coding	1987.71	-0.152488	0.0555583	-2.74465	0.00605747	0.427832
PLPP2	ENSG00000141934.10	protein_coding	69.3609	-1.43967	0.524937	-2.74256	0.00609618	0.427832
SLCO5A1	ENSG00000137571.11	protein_coding	11.4791	-0.832518	0.303579	-2.74234	0.00610035	0.427832
PIK3IP1	ENSG00000100100.14	protein_coding	343.059	0.530125	0.193326	2.74213	0.00610424	0.427832
PLOD1	ENSG00000083444.17	protein_coding	15059.3	0.284506	0.10386	2.73933	0.00615645	0.42897
TTYH2	ENSG00000141540.11	protein_coding	216.393	-0.541447	0.197776	-2.73767	0.00618753	0.42897
MAPK14	ENSG00000112062.13	protein_coding	3914.62	-0.076842	0.0280962	-2.73497	0.00623867	0.42897
NPDC1	ENSG00000107281.10	protein_coding	2405.67	0.176075	0.0644127	2.73354	0.00626577	0.42897
HSPA9	ENSG00000113013.16	protein_coding	15014.7	-0.169693	0.0621263	-2.73143	0.00630609	0.42897
GADD45G	ENSG00000130222.11	protein_coding	4.66566	1.64079	0.601308	2.72871	0.00635827	0.42897
ZNF330	ENSG00000109445.11	protein_coding	1070.19	-0.218144	0.0799621	-2.72809	0.00637016	0.42897
SYNDIG1	ENSG00000101463.6	protein_coding	95.1995	-1.60526	0.58845	-2.72795	0.00637287	0.42897
NTNG1	ENSG00000162631.20	protein_coding	93.2781	-2.58554	0.948644	-2.72551	0.00642023	0.429654
RETREG1	ENSG00000154153.15	protein_coding	103.253	1.20601	0.442707	2.72418	0.00644623	0.429654
POLR3H	ENSG00000100413.17	protein_coding	4243.7	0.147485	0.0541875	2.72176	0.00649346	0.430691
MAPRE3	ENSG00000084764.12	protein_coding	723.596	0.27111	0.0997424	2.71811	0.00656567	0.433366
ANKRD13A	ENSG00000076513.17	protein_coding	17657.2	0.202653	0.0747196	2.71218	0.00668424	0.437751
GLIPR1	ENSG00000139278.10	protein_coding	17295	0.237422	0.0875587	2.71157	0.00669649	0.437751
NUP43	ENSG00000120253.14	protein_coding	3329.04	-0.278557	0.102818	-2.70924	0.00674385	0.438737
SMAD3	ENSG00000166949.18	protein_coding	8264.42	0.350428	0.129452	2.70701	0.00678914	0.439012
NAT14	ENSG00000090971.5	protein_coding	895.091	0.199296	0.073659	2.70566	0.00681687	0.439012
GALNT4	ENSG00000257594.4	protein_coding	45.5408	0.581989	0.215276	2.70345	0.00686238	0.439012
MAPK13	ENSG00000156711.17	protein_coding	429.754	-1.21252	0.448728	-2.70212	0.00688984	0.439012
ANKRD37	ENSG00000186352.9	protein_coding	76.0938	0.599671	0.222004	2.70117	0.00690951	0.439012
ARSJ	ENSG00000180801.14	protein_coding	8361.28	0.384175	0.14238	2.69824	0.00697075	0.440843
ABI2	ENSG00000138443.17	protein_coding	5644.73	0.151023	0.0560529	2.6943	0.00705373	0.443017
SLC43A1	ENSG00000149150.9	protein_coding	312.484	-0.265364	0.0985416	-2.69292	0.00708303	0.443017
AK4	ENSG00000162433.15	protein_coding	1773.57	1.10975	0.412242	2.69198	0.00710287	0.443017
ZNF385D	ENSG00000151789.13	protein_coding	19.8075	1.61288	0.600077	2.68778	0.00719281	0.446523
CORIN	ENSG00000145244.12	protein_coding	120.525	1.50297	0.559496	2.6863	0.00722475	0.446523
GMIP	ENSG00000089639.11	protein_coding	599.249	0.24406	0.0910053	2.68182	0.00732221	0.450498
PITPNC1	ENSG00000154217.16	protein_coding	285.466	-0.607882	0.226972	-2.67823	0.00740124	0.453309
PPIB	ENSG00000166794.7	protein_coding	18267.5	0.142888	0.053478	2.67189	0.0075425	0.457988
SCN9A	ENSG00000169432.19	protein_coding	17980.7	0.35917	0.134431	2.67178	0.007545	0.457988
KCTD11	ENSG00000213859.8	protein_coding	1776.54	0.233529	0.0874758	2.66964	0.00759325	0.458869
NDUFA11	ENSG00000174886.15	protein_coding	310.781	0.228182	0.0856317	2.6647	0.00770579	0.460033
PLPP5	ENSG00000147535.17	protein_coding	1385.11	0.161319	0.0605466	2.66438	0.00771307	0.460033
BRMS1L	ENSG00000100916.14	protein_coding	650.319	-0.197067	0.0739647	-2.66434	0.00771402	0.460033
COMP	ENSG00000105664.11	protein_coding	187.154	1.82538	0.686083	2.66057	0.00780077	0.462211
ANPEP	ENSG00000166825.15	protein_coding	22134.5	-0.483956	0.182039	-2.65853	0.00784825	0.462211
KLHL13	ENSG00000003096.15	protein_coding	49.3855	1.50632	0.566711	2.658	0.00786049	0.462211
DYNC1LI2	ENSG00000135720.13	protein_coding	8732.51	0.138304	0.0520899	2.65511	0.00792836	0.462211
SLC36A1	ENSG00000123643.14	protein_coding	2717.63	0.381404	0.14366	2.6549	0.0079332	0.462211
MEIOC	ENSG00000180336.18	protein_coding	24.124	-0.977933	0.368529	-2.65361	0.00796352	0.462211
JAG2	ENSG00000184916.9	protein_coding	45.4235	0.671819	0.253497	2.65021	0.00804429	0.462211
STMN3	ENSG00000197457.10	protein_coding	2343.97	-0.37835	0.142825	-2.64905	0.00807186	0.462211
SCYL1	ENSG00000142186.18	protein_coding	5552.67	0.0871752	0.0329139	2.64858	0.00808302	0.462211
PPP4R1	ENSG00000154845.16	protein_coding	6119	-0.106923	0.0403746	-2.64827	0.00809047	0.462211
ENSG00000258311	ENSG00000258311.5	protein_coding	138.52	0.575252	0.217515	2.64465	0.00817746	0.464282
HAAO	ENSG00000162882.15	protein_coding	68.2701	-1.08428	0.410385	-2.6421	0.00823935	0.464282
COPE	ENSG00000105669.14	protein_coding	3659.82	0.151507	0.0573501	2.64178	0.00824707	0.464282
MRPS9	ENSG00000135972.9	protein_coding	984.776	-0.135475	0.0512947	-2.64111	0.00826358	0.464282
PLCL1	ENSG00000115896.17	protein_coding	112.108	0.751996	0.285202	2.63671	0.00837133	0.464282
CTNNA3	ENSG00000183230.18	protein_coding	11.3534	1.42085	0.539066	2.63576	0.00839494	0.464282
PIP4K2A	ENSG00000150867.14	protein_coding	2868.83	-0.135208	0.0512998	-2.63565	0.00839766	0.464282
SARDH	ENSG00000123453.19	protein_coding	84.3717	1.46054	0.554406	2.63443	0.00842781	0.464282
HDAC5	ENSG00000108840.17	protein_coding	4117.57	-0.237042	0.0900659	-2.63187	0.00849165	0.464282
INSYN2B	ENSG00000204767.4	protein_coding	628.968	-0.678436	0.258069	-2.6289	0.00856623	0.464282
SRGAP3	ENSG00000196220.17	protein_coding	65.2987	-0.746935	0.284174	-2.62844	0.00857765	0.464282
HS3ST3B1	ENSG00000125430.9	protein_coding	1878.35	-0.295949	0.112734	-2.62521	0.00865963	0.464282
AGTR1	ENSG00000144891.19	protein_coding	3777.01	-0.656133	0.250043	-2.62408	0.00868836	0.464282
ARL8B	ENSG00000134108.14	protein_coding	4961.71	-0.0850273	0.0324069	-2.62374	0.00869704	0.464282
MT-ND5	ENSG00000198786.2	protein_coding	3189.91	0.321755	0.122633	2.62371	0.00869776	0.464282
UBE2D1	ENSG00000072401.15	protein_coding	1061.7	-0.128545	0.0489954	-2.62361	0.00870025	0.464282
ZNF841	ENSG00000197608.12	protein_coding	637.744	0.163679	0.0624543	2.62078	0.00877277	0.464282
MRAP2	ENSG00000135324.6	protein_coding	69.0927	1.29515	0.494889	2.61706	0.00886911	0.464282
EDA	ENSG00000158813.18	protein_coding	50.3166	-1.12713	0.430847	-2.61607	0.00889477	0.464282
IGIP	ENSG00000182700.5	protein_coding	792.544	0.351172	0.13428	2.61521	0.00891723	0.464282
VPS72	ENSG00000163159.15	protein_coding	2005.53	-0.0798301	0.0305414	-2.61383	0.00895335	0.464282
PFKFB4	ENSG00000114268.12	protein_coding	345.021	0.300232	0.114879	2.61346	0.00896299	0.464282
SP3	ENSG00000172845.18	protein_coding	6916.11	-0.122675	0.0469485	-2.61297	0.00897587	0.464282
UQCR11	ENSG00000127540.12	protein_coding	448.202	0.19543	0.0748269	2.61176	0.0090078	0.464282
NF2	ENSG00000186575.20	protein_coding	28514.1	0.241334	0.0924079	2.61161	0.0090116	0.464282
ZNF22	ENSG00000165512.5	protein_coding	1441.65	-0.254182	0.0973894	-2.60996	0.00905535	0.464282
BCAT1	ENSG00000060982.15	protein_coding	43746.2	-0.266946	0.102313	-2.60911	0.00907777	0.464282
THEMIS2	ENSG00000130775.16	protein_coding	57.7042	-0.620961	0.238185	-2.60705	0.00913267	0.464282
CCNA1	ENSG00000133101.10	protein_coding	60.5735	1.06849	0.409899	2.60672	0.00914131	0.464282
HIVEP1	ENSG00000095951.18	protein_coding	2972.92	0.236353	0.0906834	2.60636	0.00915111	0.464282
FTCDNL1	ENSG00000226124.10	protein_coding	133.094	0.518941	0.199446	2.60191	0.00927063	0.467945
RTN1	ENSG00000139970.18	protein_coding	376.026	1.89302	0.727822	2.60094	0.00929674	0.467945
ALDOA	ENSG00000149925.22	protein_coding	825.473	0.280049	0.107717	2.59985	0.00932655	0.467945
PRUNE2	ENSG00000106772.19	protein_coding	3972.45	1.37061	0.528022	2.59574	0.00943872	0.470356
CXCL5	ENSG00000163735.7	protein_coding	114.343	-1.19624	0.460878	-2.59556	0.00944379	0.470356
GYG1	ENSG00000163754.18	protein_coding	5557.15	-0.148157	0.0571366	-2.59303	0.00951355	0.472101
TAFAZZIN	ENSG00000102125.17	protein_coding	611.304	-0.124791	0.0482116	-2.5884	0.00964226	0.476749
ZNF24	ENSG00000172466.16	protein_coding	4155.3	-0.0981755	0.0379977	-2.58372	0.00977405	0.478473
PRPS1	ENSG00000147224.13	protein_coding	9045.19	0.389688	0.15084	2.58346	0.00978155	0.478473
NPTX1	ENSG00000171246.7	protein_coding	268.706	-0.734145	0.284176	-2.58342	0.00978271	0.478473
EGLN1	ENSG00000135766.9	protein_coding	1126.38	0.241312	0.0935329	2.57997	0.00988095	0.480985
ZNF704	ENSG00000164684.13	protein_coding	64.5291	1.93865	0.751665	2.57913	0.00990481	0.480985
CCDC142	ENSG00000135637.15	protein_coding	312.527	0.283501	0.109985	2.57764	0.00994773	0.48135
C18orf21	ENSG00000141428.17	protein_coding	446.21	-0.198821	0.0775129	-2.56501	0.0103174	0.496532
AFDN	ENSG00000130396.22	protein_coding	2713.05	-0.17952	0.0700038	-2.56443	0.0103345	0.496532
TAS2R19	ENSG00000212124.2	protein_coding	14.6162	0.80693	0.315116	2.56074	0.010445	0.499156
NR1D2	ENSG00000174738.14	protein_coding	6810.11	-0.246471	0.0962719	-2.56015	0.0104626	0.499156
NRP2	ENSG00000118257.17	protein_coding	2113.28	-0.527747	0.206267	-2.55856	0.0105106	0.499692
ZNF619	ENSG00000177873.14	protein_coding	560.87	-0.2078	0.0813324	-2.55494	0.0106205	0.503038
PHYHD1	ENSG00000175287.19	protein_coding	163.262	-0.759637	0.297452	-2.55382	0.0106549	0.503038
CASP10	ENSG00000003400.16	protein_coding	263.99	0.735989	0.288356	2.55237	0.0106994	0.503391
FAM241A	ENSG00000174749.6	protein_coding	657.623	-0.358844	0.140765	-2.54924	0.0107957	0.504721
CSRNP1	ENSG00000144655.15	protein_coding	1680.85	0.227976	0.0895234	2.54655	0.0108794	0.504721
VAMP2	ENSG00000220205.10	protein_coding	1167.58	0.144859	0.0568977	2.54596	0.0108978	0.504721
C1QTNF3	ENSG00000082196.21	protein_coding	7.75536	1.19985	0.471822	2.54302	0.01099	0.504721
DUSP1	ENSG00000120129.6	protein_coding	7302.57	0.37748	0.148516	2.54167	0.0110325	0.504721
TFAP4	ENSG00000090447.12	protein_coding	461.399	-0.282244	0.111327	-2.53526	0.0112362	0.504721
MT-ATP8	ENSG00000228253.1	protein_coding	80.4473	0.44704	0.176332	2.53521	0.0112378	0.504721
TAF1L	ENSG00000122728.6	protein_coding	4.61834	1.30318	0.514341	2.53369	0.0112868	0.504721
ZNF626	ENSG00000188171.17	protein_coding	322.815	0.282724	0.111608	2.53319	0.011303	0.504721
POU2F2	ENSG00000028277.22	protein_coding	958.948	-0.566393	0.223713	-2.53179	0.0113482	0.504721
MTMR4	ENSG00000108389.10	protein_coding	3066.04	-0.145468	0.057504	-2.52971	0.0114158	0.504721
RBM27	ENSG00000091009.8	protein_coding	1651.76	-0.106533	0.0421234	-2.52907	0.0114364	0.504721
BCL2L2-PABPN1	ENSG00000258643.6	protein_coding	12.8682	0.761552	0.301135	2.52894	0.0114409	0.504721
KCNMB4	ENSG00000135643.5	protein_coding	119.087	1.11337	0.440272	2.52883	0.0114444	0.504721
TMEM65	ENSG00000164983.9	protein_coding	1363.14	-0.280768	0.111091	-2.52737	0.011492	0.504721
ZZZ3	ENSG00000036549.13	protein_coding	3945.46	-0.099655	0.0394403	-2.52673	0.0115129	0.504721
HAUS7	ENSG00000213397.12	protein_coding	37.5292	0.583658	0.23111	2.52546	0.0115548	0.504721
CLGN	ENSG00000153132.13	protein_coding	96.8447	-1.48157	0.586713	-2.5252	0.0115632	0.504721
RUNDC3B	ENSG00000105784.16	protein_coding	46.827	1.15736	0.458375	2.52493	0.0115722	0.504721
HDGFL3	ENSG00000166503.10	protein_coding	2832.84	-0.235633	0.093327	-2.52481	0.0115761	0.504721
METAP1	ENSG00000164024.12	protein_coding	3656.32	-0.137114	0.0543314	-2.52365	0.0116143	0.504721
ABCA3	ENSG00000167972.14	protein_coding	1376.09	0.745642	0.295554	2.52286	0.0116404	0.504721
PMF1	ENSG00000160783.19	protein_coding	1013.26	-0.165857	0.0657466	-2.52267	0.0116467	0.504721
COX14	ENSG00000178449.9	protein_coding	517.747	0.234774	0.0930718	2.52251	0.0116522	0.504721
ANKS1B	ENSG00000185046.21	protein_coding	174.814	0.643734	0.255292	2.52156	0.0116834	0.504721
SLC37A2	ENSG00000134955.12	protein_coding	198.398	-1.08066	0.428831	-2.52001	0.0117351	0.504721
GINM1	ENSG00000055211.14	protein_coding	3323.11	-0.135694	0.0538589	-2.51944	0.0117541	0.504721
C2CD3	ENSG00000168014.18	protein_coding	2124.46	0.194835	0.0774988	2.51403	0.0119359	0.504721
SMPD3	ENSG00000103056.12	protein_coding	14.3708	1.18257	0.470389	2.51403	0.011936	0.504721
USP40	ENSG00000085982.16	protein_coding	2932.87	0.217253	0.0864683	2.51251	0.0119874	0.504721
GNAI1	ENSG00000127955.17	protein_coding	2201.6	-0.218693	0.0870485	-2.51232	0.0119942	0.504721
PWP2	ENSG00000241945.8	protein_coding	101.673	1.29584	0.515878	2.51191	0.0120079	0.504721
OSBPL1A	ENSG00000141447.19	protein_coding	1488.8	-0.260121	0.103558	-2.51183	0.0120106	0.504721
KIF21B	ENSG00000116852.15	protein_coding	7.87699	-1.29178	0.514497	-2.51077	0.0120467	0.504721
RAB8B	ENSG00000166128.13	protein_coding	4210.39	-0.164256	0.0654306	-2.51038	0.01206	0.504721
SERP1	ENSG00000120742.11	protein_coding	10439.7	0.119784	0.0477457	2.50879	0.0121146	0.504721
UNC5B	ENSG00000107731.12	protein_coding	2448.79	-0.697509	0.278098	-2.50814	0.012137	0.504721
ENPP2	ENSG00000136960.13	protein_coding	14291.9	-0.610145	0.24327	-2.5081	0.0121382	0.504721
ANKRD65	ENSG00000235098.9	protein_coding	24.9561	-0.90945	0.363098	-2.50469	0.0122558	0.505513
RPL27	ENSG00000131469.15	protein_coding	3388.12	0.200604	0.0800996	2.50443	0.0122648	0.505513
GLI3	ENSG00000106571.15	protein_coding	2139.1	-0.268545	0.107236	-2.50425	0.0122711	0.505513
AK5	ENSG00000154027.19	protein_coding	2894.31	-0.57862	0.231204	-2.50264	0.012327	0.505513
DYSF	ENSG00000135636.16	protein_coding	483.767	1.02481	0.409566	2.50218	0.0123432	0.505513
TPM2	ENSG00000198467.16	protein_coding	36009.4	0.300363	0.120205	2.49876	0.0124627	0.508877
CD82	ENSG00000085117.13	protein_coding	1010.48	-0.276428	0.110676	-2.49763	0.0125028	0.508982
BATF3	ENSG00000123685.9	protein_coding	70.587	-0.72968	0.292347	-2.49593	0.0125626	0.509891
SRRM3	ENSG00000177679.16	protein_coding	24.1284	-0.748969	0.300216	-2.49477	0.012604	0.510047
ATP10D	ENSG00000145246.14	protein_coding	8316.24	0.242102	0.0972408	2.48971	0.0127846	0.511352
RAB26	ENSG00000167964.13	protein_coding	14.5288	0.843648	0.338983	2.48877	0.0128187	0.511352
KRT80	ENSG00000167767.14	protein_coding	636.032	0.524817	0.210938	2.48802	0.0128457	0.511352
PLCXD3	ENSG00000182836.11	protein_coding	117.734	1.48136	0.595599	2.48718	0.0128759	0.511352
NCF2	ENSG00000116701.16	protein_coding	61.6944	0.875597	0.35205	2.48714	0.0128774	0.511352
BBLN	ENSG00000171159.5	protein_coding	1475.31	0.179284	0.0721175	2.486	0.012919	0.511352
LANCL3	ENSG00000147036.12	protein_coding	676.833	0.674993	0.27154	2.48579	0.0129263	0.511352
RAPGEF3	ENSG00000079337.16	protein_coding	192.209	-0.341615	0.137443	-2.4855	0.012937	0.511352
MAPK7	ENSG00000166484.20	protein_coding	1720.23	0.190422	0.0766721	2.4836	0.0130063	0.512599
NAXD	ENSG00000213995.12	protein_coding	1527.13	0.147908	0.0596248	2.48064	0.0131147	0.515377
ATG7	ENSG00000197548.13	protein_coding	2010.88	-0.172395	0.0695464	-2.47884	0.013181	0.516491
DUSP12	ENSG00000081721.12	protein_coding	532.826	-0.16184	0.0655101	-2.47046	0.0134941	0.52724
NCALD	ENSG00000104490.18	protein_coding	233.82	-0.895618	0.362748	-2.46898	0.0135498	0.527899
ATP2B1	ENSG00000070961.17	protein_coding	4806.98	-0.201444	0.0816271	-2.46786	0.0135923	0.52804
SIK1	ENSG00000142178.9	protein_coding	13.2594	1.9642	0.797436	2.46315	0.0137723	0.533177
RAB31	ENSG00000168461.13	protein_coding	3477	-0.196072	0.0797015	-2.46008	0.0138908	0.533177
NBPF10	ENSG00000271425.9	protein_coding	414.157	0.370187	0.150496	2.45978	0.0139022	0.533177
MFSD10	ENSG00000109736.15	protein_coding	3177.56	0.171072	0.0695598	2.45935	0.013919	0.533177
SNX11	ENSG00000002919.15	protein_coding	1274.41	0.150376	0.0611456	2.45931	0.0139206	0.533177
OR7D2	ENSG00000188000.6	protein_coding	3.84106	5.01193	2.0422	2.45418	0.0141205	0.53823
MYL6	ENSG00000092841.19	protein_coding	29739.9	0.174951	0.071323	2.45293	0.0141696	0.53823
KCNC3	ENSG00000131398.15	protein_coding	8.958	1.08992	0.444339	2.45289	0.0141712	0.53823
TBC1D10A	ENSG00000099992.16	protein_coding	554.976	0.238697	0.0974064	2.45053	0.0142647	0.540078
FAM222B	ENSG00000173065.14	protein_coding	824.503	0.202486	0.082667	2.44942	0.0143086	0.540078
SET	ENSG00000119335.18	protein_coding	28126.4	-0.083777	0.0342409	-2.44669	0.0144174	0.540078
EBAG9	ENSG00000147654.16	protein_coding	543.644	-0.153783	0.0628644	-2.44627	0.0144342	0.540078
SV2A	ENSG00000159164.10	protein_coding	2347.09	-0.391602	0.160123	-2.44564	0.0144597	0.540078
LPAR2	ENSG00000064547.14	protein_coding	51.3977	0.472838	0.193386	2.44504	0.0144835	0.540078
PIERCE2	ENSG00000261652.3	protein_coding	30.6947	0.567045	0.23195	2.44468	0.0144979	0.540078
AIDA	ENSG00000186063.13	protein_coding	5127.25	-0.0942498	0.0386686	-2.43737	0.0147945	0.548303
TMEM170B	ENSG00000205269.6	protein_coding	361.735	0.363236	0.149035	2.43725	0.0147994	0.548303
CDYL2	ENSG00000166446.15	protein_coding	1490.84	-0.299545	0.123016	-2.43502	0.0148911	0.550201
ZBTB20	ENSG00000181722.18	protein_coding	3482.41	0.338385	0.139114	2.43244	0.0149977	0.551415
WDR25	ENSG00000176473.14	protein_coding	650.956	-0.243738	0.10021	-2.43226	0.015005	0.551415
ASF1A	ENSG00000111875.8	protein_coding	1150.65	-0.253046	0.104095	-2.43091	0.015061	0.551979
ACVR2A	ENSG00000121989.15	protein_coding	995.13	0.49887	0.205352	2.42934	0.0151263	0.552882
SYT9	ENSG00000170743.17	protein_coding	19.6636	2.84985	1.17388	2.42773	0.0151939	0.553863
PPP4R3A	ENSG00000100796.18	protein_coding	3684.94	-0.105846	0.0436213	-2.42648	0.0152462	0.554287
VIRMA	ENSG00000164944.12	protein_coding	5531.8	-0.0722855	0.0298158	-2.4244	0.0153335	0.555031
WTIP	ENSG00000142279.13	protein_coding	1673.23	0.230207	0.0949761	2.42385	0.0153571	0.555031
MT-ND6	ENSG00000198695.2	protein_coding	1188.42	0.294516	0.121586	2.42229	0.015423	0.555031
BNIP3	ENSG00000176171.12	protein_coding	4767.22	0.355214	0.146654	2.42213	0.01543	0.555031
SLC22A23	ENSG00000137266.15	protein_coding	1076.71	0.430636	0.177947	2.42002	0.0155195	0.555573
PGK1	ENSG00000102144.15	protein_coding	19473.2	0.154136	0.0636963	2.41985	0.0155268	0.555573
FAAP100	ENSG00000185504.17	protein_coding	2885.73	0.112355	0.0464489	2.4189	0.0155677	0.555575
CXXC5	ENSG00000171604.12	protein_coding	4459.22	0.319286	0.132164	2.41583	0.0156993	0.558628
ZNF254	ENSG00000213096.11	protein_coding	444.18	0.167634	0.0694404	2.41407	0.0157753	0.558628
TDG	ENSG00000139372.15	protein_coding	1980.2	0.157547	0.0652628	2.41405	0.0157765	0.558628
SERTAD1	ENSG00000197019.5	protein_coding	1503.9	0.210688	0.0874048	2.41049	0.0159313	0.561279
AKR7A3	ENSG00000162482.5	protein_coding	10.4904	0.941648	0.39076	2.40979	0.0159618	0.561279
TAX1BP3	ENSG00000213977.8	protein_coding	233.543	0.28909	0.120033	2.40843	0.0160213	0.561279
PDGFRL	ENSG00000104213.13	protein_coding	323.284	1.02786	0.426789	2.40835	0.0160248	0.561279
GPI	ENSG00000105220.17	protein_coding	16152.6	0.167967	0.0697652	2.4076	0.0160578	0.561279
TM4SF1	ENSG00000169908.12	protein_coding	2271.92	-0.585077	0.243249	-2.40526	0.0161608	0.563432
TBC1D4	ENSG00000136111.14	protein_coding	1127.86	-0.570884	0.237633	-2.40237	0.0162892	0.566456
PGAP1	ENSG00000197121.15	protein_coding	1743.84	-0.16418	0.0683944	-2.40049	0.0163731	0.56672
XPO1	ENSG00000082898.19	protein_coding	15879.5	-0.167461	0.0697889	-2.39954	0.0164157	0.56672
ZNF69	ENSG00000198429.10	protein_coding	225.107	0.298598	0.124447	2.3994	0.0164218	0.56672
INPP5A	ENSG00000068383.19	protein_coding	3128.12	-0.252765	0.105389	-2.39839	0.0164675	0.566857
LIF	ENSG00000128342.5	protein_coding	2967.74	0.486994	0.20334	2.39497	0.0166217	0.570722
PNPLA7	ENSG00000130653.16	protein_coding	69.1615	0.834921	0.349021	2.39218	0.0167486	0.572194
SHBG	ENSG00000129214.15	protein_coding	23.2049	0.608462	0.254355	2.39218	0.0167488	0.572194
FBXL16	ENSG00000127585.13	protein_coding	24.5587	0.736592	0.308234	2.38972	0.0168614	0.574599
ADORA2B	ENSG00000170425.4	protein_coding	134.897	0.539029	0.225963	2.38548	0.0170569	0.579806
ASH2L	ENSG00000129691.16	protein_coding	2713.8	-0.131384	0.055184	-2.38083	0.0172736	0.583833
BMP4	ENSG00000125378.16	protein_coding	18.2898	1.74477	0.732998	2.38033	0.0172973	0.583833
SERPINA1	ENSG00000197249.14	protein_coding	18.5232	-1.61186	0.678287	-2.37637	0.0174839	0.583833
PTPN12	ENSG00000127947.16	protein_coding	5166.71	-0.214682	0.0903844	-2.37521	0.017539	0.583833
RTL8C	ENSG00000134590.14	protein_coding	6866.64	0.217273	0.0914936	2.37473	0.0175618	0.583833
ANKRD13D	ENSG00000172932.16	protein_coding	734.224	0.129989	0.0547612	2.37375	0.0176085	0.583833
MT-ND1	ENSG00000198888.2	protein_coding	2009.91	0.310792	0.130955	2.37328	0.017631	0.583833
FMNL3	ENSG00000161791.14	protein_coding	4699.35	-0.225948	0.0952234	-2.37283	0.0176526	0.583833
ELP4	ENSG00000109911.19	protein_coding	696.735	-0.156624	0.0660298	-2.37202	0.0176911	0.583833
TMEM209	ENSG00000146842.17	protein_coding	1608.87	-0.222479	0.093805	-2.37172	0.0177056	0.583833
NPAS1	ENSG00000130751.10	protein_coding	222.128	0.739237	0.311725	2.37144	0.0177191	0.583833
GTPBP10	ENSG00000105793.16	protein_coding	1281.7	-0.151671	0.0639837	-2.37047	0.0177657	0.583833
CHKA	ENSG00000110721.12	protein_coding	558.918	-0.235215	0.0992443	-2.37006	0.017785	0.583833
ACTG2	ENSG00000163017.14	protein_coding	1803.74	-1.69856	0.716722	-2.3699	0.0177927	0.583833
NRIP3	ENSG00000175352.12	protein_coding	1177.75	-0.465571	0.196498	-2.36935	0.0178194	0.583833
TSPAN2	ENSG00000134198.10	protein_coding	535.213	0.72092	0.304819	2.36508	0.0180263	0.587734
RIMS1	ENSG00000079841.20	protein_coding	822.058	0.806966	0.341351	2.36403	0.0180772	0.587734
MFSD3	ENSG00000167700.9	protein_coding	803.533	0.207406	0.0878117	2.36194	0.0181797	0.587734
ADGRB2	ENSG00000121753.13	protein_coding	609.716	-0.247501	0.104804	-2.36157	0.0181976	0.587734
ALG9	ENSG00000086848.15	protein_coding	512.531	-0.152845	0.0647493	-2.36057	0.0182469	0.587734
B4GALNT1	ENSG00000135454.14	protein_coding	599.451	-0.542975	0.230139	-2.35934	0.0183075	0.587734
FLRT3	ENSG00000125848.10	protein_coding	54.287	0.922325	0.390937	2.35927	0.018311	0.587734
NFKB2	ENSG00000077150.21	protein_coding	3220.97	-0.157277	0.0666968	-2.35809	0.0183694	0.587734
HPS4	ENSG00000100099.22	protein_coding	1482.06	-0.0860706	0.0365029	-2.35791	0.018378	0.587734
POLR2J2	ENSG00000228049.8	protein_coding	27.7808	0.849857	0.360515	2.35734	0.0184062	0.587734
KRT19	ENSG00000171345.13	protein_coding	1022.1	-1.91507	0.81244	-2.35719	0.018414	0.587734
ATP5ME	ENSG00000169020.10	protein_coding	763.94	0.250605	0.106456	2.35407	0.0185691	0.590139
EDN1	ENSG00000078401.7	protein_coding	172.96	0.714295	0.303553	2.35312	0.0186169	0.590139
NARS2	ENSG00000137513.11	protein_coding	662.209	-0.228203	0.0969812	-2.35306	0.0186195	0.590139
DPY19L2	ENSG00000177990.12	protein_coding	74.6381	-0.815021	0.346882	-2.34956	0.0187954	0.594328
POLD4	ENSG00000175482.9	protein_coding	207.247	0.213417	0.090883	2.34826	0.0188616	0.595036
SUCLG2	ENSG00000172340.15	protein_coding	3713.62	-0.143318	0.0611506	-2.34368	0.0190945	0.598773
TRDMT1	ENSG00000107614.22	protein_coding	499.999	-0.230165	0.098218	-2.34341	0.0191084	0.598773
SNX30	ENSG00000148158.17	protein_coding	3123.56	0.186306	0.0795125	2.3431	0.019124	0.598773
MICU3	ENSG00000155970.12	protein_coding	555.738	-0.254778	0.108788	-2.34197	0.0191821	0.598773
ABI1	ENSG00000136754.18	protein_coding	3994.5	-0.105694	0.0451372	-2.34162	0.0192002	0.598773
IVD	ENSG00000128928.10	protein_coding	2746.72	0.14805	0.0632815	2.33955	0.019307	0.598819
DMAP1	ENSG00000178028.14	protein_coding	786.63	0.170199	0.072761	2.33915	0.0193278	0.598819
CYP7B1	ENSG00000172817.4	protein_coding	38.1514	-1.37604	0.588341	-2.33886	0.0193429	0.598819
BVES	ENSG00000112276.14	protein_coding	1246.94	-0.301179	0.128809	-2.33818	0.0193778	0.598819
ZBTB38	ENSG00000177311.12	protein_coding	14100.5	-0.164495	0.0704105	-2.33623	0.019479	0.600582
GID8	ENSG00000101193.8	protein_coding	3998.28	0.119662	0.0512565	2.33457	0.0195657	0.601888
STARD10	ENSG00000214530.10	protein_coding	419.398	-0.367163	0.157497	-2.33124	0.0197406	0.605574
POLH	ENSG00000170734.12	protein_coding	4554.12	0.132483	0.0568452	2.3306	0.0197746	0.605574
EPPK1	ENSG00000261150.3	protein_coding	218.762	1.18553	0.509321	2.32767	0.0199294	0.608943
UBE2Q1	ENSG00000160714.11	protein_coding	3336.33	0.0988411	0.0424852	2.32648	0.0199928	0.609511
DLG3	ENSG00000082458.12	protein_coding	607.976	-0.305542	0.131501	-2.3235	0.0201521	0.612994
SIL1	ENSG00000120725.13	protein_coding	2048.88	0.228426	0.0985228	2.31851	0.0204214	0.618515
ARMCX3	ENSG00000102401.20	protein_coding	3468.22	0.205227	0.0885431	2.31782	0.0204592	0.618515
FRMD4B	ENSG00000114541.15	protein_coding	41.5273	1.10272	0.475801	2.31762	0.0204701	0.618515
ZSCAN21	ENSG00000166529.16	protein_coding	350.652	-0.207146	0.0894523	-2.31572	0.0205736	0.618554
TRIM38	ENSG00000112343.11	protein_coding	1724.87	0.191957	0.082906	2.31536	0.0205931	0.618554
EMID1	ENSG00000186998.16	protein_coding	4.1096	1.84905	0.798791	2.31481	0.0206232	0.618554
ZKSCAN2	ENSG00000155592.16	protein_coding	1006.81	0.173654	0.0750458	2.31397	0.0206693	0.618554
ZSCAN22	ENSG00000182318.7	protein_coding	432.054	-0.172906	0.0747781	-2.31226	0.0207634	0.618554
FMO3	ENSG00000007933.13	protein_coding	960.922	1.50872	0.652523	2.31213	0.0207705	0.618554
IGFBP2	ENSG00000115457.10	protein_coding	16786.2	0.629405	0.27226	2.31178	0.0207898	0.618554
MYO7B	ENSG00000169994.20	protein_coding	109.09	-0.838488	0.362908	-2.31047	0.0208621	0.618738
KCNJ6	ENSG00000157542.11	protein_coding	30.4794	1.71976	0.744476	2.31002	0.020887	0.618738
LRRC8C	ENSG00000171488.15	protein_coding	1403.63	-0.457184	0.198089	-2.30797	0.0210006	0.619123
ILF2	ENSG00000143621.17	protein_coding	9964.92	-0.139963	0.0606628	-2.30723	0.0210418	0.619123
PPAN	ENSG00000130810.20	protein_coding	185.156	0.230466	0.0999038	2.30688	0.0210615	0.619123
FHIP1A	ENSG00000164142.16	protein_coding	105.67	-0.512608	0.222244	-2.30651	0.0210821	0.619123
PDK1	ENSG00000152256.14	protein_coding	2246.43	0.343406	0.149064	2.30374	0.0212371	0.622051
PDIA5	ENSG00000065485.20	protein_coding	1471.26	0.197604	0.0857992	2.3031	0.0212734	0.622051
RPL36	ENSG00000130255.13	protein_coding	9727.09	0.143048	0.0621762	2.30069	0.0214092	0.624548
COL24A1	ENSG00000171502.15	protein_coding	92.795	-0.803559	0.34938	-2.29996	0.0214506	0.624548
ZNF160	ENSG00000170949.18	protein_coding	1007.24	0.229082	0.0996643	2.29853	0.0215316	0.625396
TOX2	ENSG00000124191.18	protein_coding	570.137	-0.669332	0.291478	-2.29634	0.0216565	0.625396
SPPL2A	ENSG00000138600.11	protein_coding	7962.53	-0.144261	0.0628226	-2.29631	0.0216579	0.625396
ZNF846	ENSG00000196605.7	protein_coding	168.563	0.259147	0.11286	2.29618	0.0216655	0.625396
CYP26B1	ENSG00000003137.9	protein_coding	133.935	1.08376	0.472142	2.29541	0.0217097	0.625396
SIPA1	ENSG00000213445.10	protein_coding	1394.45	-0.333345	0.145327	-2.29376	0.0218042	0.625703
TXNDC15	ENSG00000113621.15	protein_coding	3277.16	0.179695	0.078346	2.29361	0.0218131	0.625703
TMEM54	ENSG00000121900.19	protein_coding	855.915	-0.209116	0.091231	-2.29216	0.0218965	0.625703
MPDZ	ENSG00000107186.17	protein_coding	2573.87	0.366946	0.160169	2.29099	0.0219638	0.625703
PPP2R5B	ENSG00000068971.14	protein_coding	1414.03	0.144157	0.0629296	2.29076	0.0219771	0.625703
PITPNM2	ENSG00000090975.14	protein_coding	1061.83	-0.325171	0.142007	-2.28983	0.0220311	0.625703
HPS3	ENSG00000163755.9	protein_coding	2495.54	-0.198096	0.0865592	-2.28857	0.0221046	0.625703
PLEKHH2	ENSG00000152527.14	protein_coding	96.0976	0.540752	0.236332	2.2881	0.0221316	0.625703
CTPS2	ENSG00000047230.15	protein_coding	722.351	-0.198407	0.0867146	-2.28805	0.0221345	0.625703
RHOBTB1	ENSG00000072422.17	protein_coding	528.764	-0.283995	0.124211	-2.28638	0.0222318	0.626241
RAB3IL1	ENSG00000167994.13	protein_coding	731.245	-0.37493	0.164001	-2.28615	0.0222457	0.626241
AFAP1	ENSG00000196526.11	protein_coding	28354.4	0.241102	0.105521	2.28487	0.0223205	0.627048
CA12	ENSG00000074410.14	protein_coding	3417.29	-0.869396	0.38081	-2.28302	0.0224293	0.628807
NAPA	ENSG00000105402.8	protein_coding	2645.38	0.114137	0.0500265	2.28153	0.0225173	0.629974
TCEA3	ENSG00000204219.11	protein_coding	261.653	-0.563959	0.247302	-2.28045	0.0225811	0.630464
ZC2HC1A	ENSG00000104427.13	protein_coding	675.825	-0.218767	0.096061	-2.27737	0.022764	0.634267
ELK3	ENSG00000111145.8	protein_coding	4625.9	-0.250878	0.110224	-2.27607	0.0228416	0.634855
SRGAP1	ENSG00000196935.10	protein_coding	8362.99	-0.160592	0.070603	-2.27458	0.0229309	0.634855
MEGF6	ENSG00000162591.17	protein_coding	10470.4	0.469056	0.206228	2.27445	0.0229389	0.634855
PAMR1	ENSG00000149090.13	protein_coding	2763.75	-0.553373	0.243358	-2.2739	0.0229719	0.634855
NENF	ENSG00000117691.10	protein_coding	1176.58	0.18146	0.079847	2.27259	0.0230507	0.635742
ATP5F1D	ENSG00000099624.8	protein_coding	4712.09	0.119185	0.052463	2.2718	0.0230986	0.635772
SLC30A8	ENSG00000164756.13	protein_coding	23.5282	-7.00526	3.08559	-2.27032	0.0231884	0.635809
STK32B	ENSG00000152953.13	protein_coding	311.92	0.914448	0.402824	2.27009	0.023202	0.635809
ZNF443	ENSG00000180855.16	protein_coding	62.7274	0.324538	0.143129	2.26746	0.0233622	0.635809
LUZP2	ENSG00000187398.12	protein_coding	372.231	1.82276	0.804443	2.26586	0.0234598	0.635809
DRP2	ENSG00000102385.13	protein_coding	750.842	-0.510722	0.225599	-2.26385	0.0235835	0.635809
SPIN1	ENSG00000106723.17	protein_coding	10227.5	-0.0819097	0.0361905	-2.26329	0.0236175	0.635809
ACYP2	ENSG00000170634.13	protein_coding	389.654	0.221114	0.0976961	2.26329	0.023618	0.635809
CD109	ENSG00000156535.15	protein_coding	8894.68	-0.286539	0.126643	-2.26258	0.0236619	0.635809
B3GALT5	ENSG00000183778.19	protein_coding	3.40343	-2.47706	1.09537	-2.2614	0.0237347	0.635809
TST	ENSG00000128311.14	protein_coding	830.013	0.198601	0.0878692	2.26018	0.0238099	0.635809
CPNE2	ENSG00000140848.17	protein_coding	1651.61	-0.182848	0.0809328	-2.25926	0.0238671	0.635809
TIMM10	ENSG00000134809.9	protein_coding	794.194	-0.419051	0.185521	-2.25878	0.023897	0.635809
RIT1	ENSG00000143622.12	protein_coding	1796.54	0.223829	0.0991387	2.25773	0.0239624	0.635809
POPDC3	ENSG00000132429.10	protein_coding	612.213	-0.29879	0.132409	-2.25658	0.0240344	0.635809
HS3ST3A1	ENSG00000153976.3	protein_coding	1494.64	-0.340187	0.150785	-2.2561	0.0240641	0.635809
S1PR5	ENSG00000180739.15	protein_coding	12.093	1.71778	0.761535	2.25568	0.0240906	0.635809
ALPK1	ENSG00000073331.18	protein_coding	516.756	-0.292349	0.129659	-2.25475	0.0241491	0.635809
RET	ENSG00000165731.22	protein_coding	14.7868	-0.91923	0.407937	-2.25336	0.0242364	0.635809
ADIRF	ENSG00000148671.15	protein_coding	1685.28	0.618971	0.274704	2.25323	0.0242448	0.635809
SYNGR2	ENSG00000108639.8	protein_coding	2343.87	0.325498	0.144543	2.2519	0.0243284	0.635809
PPP1CC	ENSG00000186298.12	protein_coding	8558.93	-0.103017	0.045753	-2.25159	0.0243484	0.635809
EXOSC8	ENSG00000120699.14	protein_coding	1309.53	-0.271603	0.120645	-2.25125	0.0243696	0.635809
PEPD	ENSG00000124299.16	protein_coding	3090.77	-0.149794	0.0665746	-2.25001	0.024448	0.635809
PRKACA	ENSG00000072062.16	protein_coding	6484.24	0.109032	0.0484692	2.24952	0.0244797	0.635809
MED15	ENSG00000099917.17	protein_coding	5924.56	0.116813	0.0519408	2.24897	0.0245144	0.635809
KNDC1	ENSG00000171798.19	protein_coding	26.3596	1.07175	0.47659	2.24878	0.0245266	0.635809
MT1E	ENSG00000169715.15	protein_coding	3248.77	-0.479083	0.213051	-2.24868	0.0245327	0.635809
TSKS	ENSG00000126467.11	protein_coding	4.94002	2.82539	1.25655	2.24852	0.0245428	0.635809
RTL5	ENSG00000242732.6	protein_coding	406.821	-0.367704	0.163554	-2.24821	0.0245625	0.635809
TOM1L2	ENSG00000175662.19	protein_coding	4967.47	0.257123	0.11437	2.24817	0.0245651	0.635809
FAM234A	ENSG00000167930.17	protein_coding	6338.49	0.190161	0.084585	2.24817	0.0245656	0.635809
ZNF578	ENSG00000258405.11	protein_coding	301.727	0.414964	0.184642	2.2474	0.0246146	0.635809
MED31	ENSG00000108590.11	protein_coding	301.148	-0.20087	0.0893966	-2.24695	0.024643	0.635809
DEPTOR	ENSG00000155792.10	protein_coding	257.445	0.949355	0.422721	2.24582	0.0247157	0.636477
CDC42BPG	ENSG00000171219.9	protein_coding	8.83154	0.920808	0.410585	2.24267	0.024918	0.639986
IL32	ENSG00000008517.19	protein_coding	1022.36	-0.716749	0.319658	-2.24224	0.0249461	0.639986
LIPH	ENSG00000163898.10	protein_coding	8.27473	1.32753	0.592306	2.2413	0.0250068	0.640334
MPHOSPH9	ENSG00000051825.15	protein_coding	1856.77	-0.271856	0.121391	-2.23951	0.0251225	0.641421
RNF215	ENSG00000099999.15	protein_coding	638.281	0.163765	0.0731426	2.23898	0.0251574	0.641421
HEATR1	ENSG00000119285.11	protein_coding	6235.17	-0.113435	0.0506753	-2.23846	0.0251908	0.641421
FLG	ENSG00000143631.11	protein_coding	251.303	3.23169	1.44525	2.23608	0.0253467	0.644185
TACSTD2	ENSG00000184292.7	protein_coding	20.0398	-1.17987	0.528036	-2.23444	0.0254539	0.645581
TAS2R1	ENSG00000169777.7	protein_coding	23.1015	0.944058	0.422793	2.23291	0.0255548	0.645581
IL13RA2	ENSG00000123496.8	protein_coding	6.72865	-1.78253	0.79837	-2.23271	0.0255681	0.645581
TMEM178B	ENSG00000261115.7	protein_coding	1703.5	1.09115	0.488924	2.23173	0.025633	0.645581
MAB21L3	ENSG00000173212.5	protein_coding	9.70721	-0.940717	0.421537	-2.23164	0.025639	0.645581
CLBA1	ENSG00000140104.14	protein_coding	330.645	0.333821	0.149739	2.22935	0.0257903	0.647329
SEC31B	ENSG00000075826.17	protein_coding	66.7418	0.522515	0.234447	2.22871	0.025833	0.647329
TIFA	ENSG00000145365.12	protein_coding	532.856	-0.26117	0.117199	-2.22844	0.0258513	0.647329
KCNK3	ENSG00000171303.8	protein_coding	108.779	-1.18273	0.530959	-2.22754	0.025911	0.647454
FBXO27	ENSG00000161243.10	protein_coding	116.116	-0.818179	0.367401	-2.22694	0.0259515	0.647454
TMEM69	ENSG00000159596.7	protein_coding	1056.54	-0.127622	0.0573485	-2.22537	0.0260562	0.648877
KIAA0319L	ENSG00000142687.19	protein_coding	2349.46	0.163551	0.0735516	2.22362	0.0261742	0.650066
TMEM164	ENSG00000157600.13	protein_coding	1377.2	-0.165376	0.0743853	-2.22324	0.0261996	0.650066
SLC43A3	ENSG00000134802.18	protein_coding	1011.16	-0.435309	0.195943	-2.22161	0.0263096	0.650571
USP51	ENSG00000247746.5	protein_coding	86.6155	-0.38072	0.171527	-2.21959	0.0264464	0.650571
PEAK3	ENSG00000188305.6	protein_coding	6.7073	-1.30222	0.586949	-2.21862	0.0265125	0.650571
PIM3	ENSG00000198355.5	protein_coding	1802.09	-0.211777	0.0954705	-2.21824	0.0265384	0.650571
MAN2A2	ENSG00000196547.15	protein_coding	1992.79	0.221941	0.100063	2.218	0.0265548	0.650571
CDH23	ENSG00000107736.22	protein_coding	7.35604	1.05182	0.474261	2.21782	0.0265674	0.650571
EVI5L	ENSG00000142459.9	protein_coding	2924.02	0.182726	0.0824106	2.21726	0.0266053	0.650571
TTC7A	ENSG00000068724.18	protein_coding	1879.27	0.172537	0.0778572	2.21607	0.0266867	0.650571
THBD	ENSG00000178726.7	protein_coding	249.123	-0.897122	0.40488	-2.21577	0.0267072	0.650571
PRTFDC1	ENSG00000099256.19	protein_coding	853.373	-0.188068	0.0848919	-2.21539	0.0267336	0.650571
SLC15A4	ENSG00000139370.12	protein_coding	1260.84	0.138723	0.0626233	2.2152	0.0267463	0.650571
ZBED6	ENSG00000257315.4	protein_coding	434.418	0.179843	0.0812791	2.21266	0.0269214	0.651879
SLC46A1	ENSG00000076351.13	protein_coding	718.257	0.278234	0.125757	2.21248	0.0269336	0.651879
GOLPH3	ENSG00000113384.14	protein_coding	8294.18	-0.0692071	0.0312824	-2.21233	0.0269439	0.651879
NDUFA2	ENSG00000131495.9	protein_coding	909.181	0.189238	0.0855921	2.21093	0.0270405	0.652807
SNN	ENSG00000184602.6	protein_coding	528.808	0.167921	0.0759948	2.20963	0.0271306	0.652807
MDGA1	ENSG00000112139.17	protein_coding	653.594	0.491076	0.222345	2.20863	0.0272007	0.652807
ZNF518A	ENSG00000177853.15	protein_coding	1025.76	-0.159396	0.0721789	-2.20835	0.02722	0.652807
B3GLCT	ENSG00000187676.8	protein_coding	1063.04	-0.352671	0.159701	-2.20832	0.0272223	0.652807
ZNF587	ENSG00000198466.12	protein_coding	1764.37	0.112823	0.0511125	2.20734	0.02729	0.652915
SPON2	ENSG00000159674.12	protein_coding	148.389	1.22179	0.553873	2.2059	0.0273909	0.652915
HAS2	ENSG00000170961.7	protein_coding	5733.43	-0.455008	0.20629	-2.20567	0.0274072	0.652915
PKN2	ENSG00000065243.20	protein_coding	4424.77	-0.106905	0.048472	-2.2055	0.0274189	0.652915
UBQLN4	ENSG00000160803.8	protein_coding	3279.2	-0.0767013	0.034798	-2.20419	0.0275111	0.653965
LRRC40	ENSG00000066557.6	protein_coding	1256.75	-0.163936	0.0744648	-2.20152	0.0276993	0.654712
RASGEF1A	ENSG00000198915.12	protein_coding	6.64723	-1.17748	0.535012	-2.20085	0.0277469	0.654712
CEP70	ENSG00000114107.9	protein_coding	510.094	-0.221682	0.100742	-2.20048	0.0277726	0.654712
HSD17B12	ENSG00000149084.13	protein_coding	4242.14	-0.0772729	0.0351298	-2.19964	0.0278327	0.654712
NUFIP1	ENSG00000083635.8	protein_coding	679.697	-0.135005	0.0613845	-2.19933	0.0278543	0.654712
ARNT2	ENSG00000172379.22	protein_coding	3921.64	-0.323229	0.147051	-2.19808	0.0279431	0.654712
CGREF1	ENSG00000138028.17	protein_coding	299.708	0.685096	0.311686	2.19803	0.027947	0.654712
ARMT1	ENSG00000146476.11	protein_coding	1702.28	-0.132312	0.0602508	-2.19602	0.0280902	0.654712
USP3	ENSG00000140455.17	protein_coding	2410.97	-0.154924	0.0705545	-2.19581	0.0281057	0.654712
ZNF257	ENSG00000197134.13	protein_coding	30.4689	1.56368	0.712124	2.1958	0.0281062	0.654712
PLA2G4A	ENSG00000116711.10	protein_coding	264.104	-0.465142	0.21186	-2.19551	0.0281268	0.654712
TUFT1	ENSG00000143367.17	protein_coding	3491.07	0.277317	0.126335	2.19509	0.0281568	0.654712
TRIM8	ENSG00000171206.17	protein_coding	10040.5	-0.112731	0.0513595	-2.19493	0.0281685	0.654712
RASGRP1	ENSG00000172575.14	protein_coding	666.198	0.826344	0.376823	2.19292	0.0283131	0.656951
FBXL12	ENSG00000127452.9	protein_coding	894.055	0.148763	0.067873	2.19179	0.0283946	0.657309
GRK2	ENSG00000173020.11	protein_coding	2663.15	0.0845292	0.0385737	2.19137	0.0284252	0.657309
LRRC49	ENSG00000137821.12	protein_coding	510.799	-0.226289	0.10335	-2.18953	0.0285581	0.658157
HSF2	ENSG00000025156.13	protein_coding	651.705	-0.149712	0.0683763	-2.18953	0.0285587	0.658157
SAMD4A	ENSG00000020577.14	protein_coding	8705.27	0.205234	0.0938804	2.18612	0.0288068	0.659884
ZNF622	ENSG00000173545.5	protein_coding	1499.24	0.150458	0.0688335	2.18583	0.028828	0.659884
FRMD8	ENSG00000126391.14	protein_coding	2398.92	0.140559	0.0643255	2.18512	0.0288804	0.659884
ABHD13	ENSG00000139826.6	protein_coding	1086.56	-0.11555	0.0528836	-2.18498	0.0288905	0.659884
ALDH18A1	ENSG00000059573.9	protein_coding	9129.9	0.15801	0.072335	2.18441	0.0289319	0.659884
THAP12	ENSG00000137492.9	protein_coding	3191.79	-0.108324	0.0496043	-2.18377	0.0289795	0.659884
LMAN2	ENSG00000169223.16	protein_coding	6041.75	0.112877	0.0517012	2.18325	0.0290171	0.659884
CYGB	ENSG00000161544.10	protein_coding	11.116	-1.23927	0.567966	-2.18195	0.0291134	0.659884
H4C11	ENSG00000197238.5	protein_coding	84.4904	-0.427558	0.195974	-2.18171	0.0291313	0.659884
ATE1	ENSG00000107669.19	protein_coding	2388.56	-0.0867832	0.0397804	-2.18156	0.0291423	0.659884
CTCF	ENSG00000102974.16	protein_coding	2650.8	-0.137789	0.0631853	-2.1807	0.0292053	0.659884
DDT	ENSG00000099977.16	protein_coding	204.486	0.218795	0.100358	2.18015	0.0292465	0.659884
C11orf87	ENSG00000185742.7	protein_coding	86.8715	1.16852	0.53619	2.17931	0.0293089	0.659884
ISOC2	ENSG00000063241.8	protein_coding	2032.09	0.13997	0.0642338	2.17906	0.0293268	0.659884
OVCA2	ENSG00000262664.3	protein_coding	77.8997	0.295957	0.135856	2.17846	0.029372	0.659884
TPD52	ENSG00000076554.16	protein_coding	66.3999	1.44499	0.663757	2.17699	0.0294816	0.659884
PROCR	ENSG00000101000.6	protein_coding	616.907	-0.252786	0.116119	-2.17696	0.0294839	0.659884
SIPA1L1	ENSG00000197555.10	protein_coding	10903.6	0.291324	0.133844	2.17659	0.0295109	0.659884
PCDH7	ENSG00000169851.16	protein_coding	621.151	1.27073	0.584064	2.17568	0.0295795	0.659884
SNRNP40	ENSG00000060688.13	protein_coding	2326.93	-0.154188	0.0708798	-2.17534	0.0296043	0.659884
RHEB	ENSG00000106615.10	protein_coding	4319.92	-0.166121	0.0764228	-2.17371	0.0297269	0.661354
FAM124A	ENSG00000150510.17	protein_coding	65.2304	0.9033	0.415661	2.17317	0.0297678	0.661354
DAPK1	ENSG00000196730.13	protein_coding	1288.76	0.967082	0.445222	2.17213	0.0298456	0.661354
CA9	ENSG00000107159.14	protein_coding	20.1093	1.55837	0.717892	2.17075	0.02995	0.661354
ALDH5A1	ENSG00000112294.14	protein_coding	317.927	0.556743	0.256608	2.16962	0.0300354	0.661354
MTREX	ENSG00000039123.16	protein_coding	3959.77	-0.135836	0.0626165	-2.16933	0.0300576	0.661354
FOXJ3	ENSG00000198815.9	protein_coding	3805.22	-0.0520533	0.0239987	-2.16901	0.0300821	0.661354
OPRL1	ENSG00000125510.18	protein_coding	82.571	-0.480732	0.221666	-2.16872	0.0301039	0.661354
BBS7	ENSG00000138686.10	protein_coding	1081.61	-0.116257	0.0536188	-2.16821	0.0301427	0.661354
PLEKHN1	ENSG00000187583.11	protein_coding	203.949	-0.553892	0.255504	-2.16784	0.0301707	0.661354
SMCO3	ENSG00000179256.2	protein_coding	5.56481	1.59823	0.7374	2.16739	0.0302053	0.661354
MAPK8IP3	ENSG00000138834.15	protein_coding	1265.56	0.259263	0.11966	2.16666	0.0302607	0.661502
MRPS35	ENSG00000061794.13	protein_coding	2550.55	-0.141685	0.0654717	-2.16407	0.0304593	0.663217
RBMX	ENSG00000147274.14	protein_coding	10238.9	-0.159023	0.0734949	-2.16373	0.0304847	0.663217
ECSIT	ENSG00000130159.15	protein_coding	1204.47	-0.167184	0.0772666	-2.16373	0.0304855	0.663217
CLASP2	ENSG00000163539.19	protein_coding	3556.27	-0.173816	0.080356	-2.16308	0.0305353	0.663241
ENOX2	ENSG00000165675.20	protein_coding	761.364	-0.17223	0.0796867	-2.16134	0.0306688	0.664902
ZNF106	ENSG00000103994.18	protein_coding	10273.5	0.237119	0.109767	2.1602	0.0307575	0.664902
METTL4	ENSG00000101574.15	protein_coding	789.701	-0.237205	0.109808	-2.16018	0.0307585	0.664902
ERGIC1	ENSG00000113719.17	protein_coding	13966.3	0.166999	0.0773543	2.15888	0.0308594	0.666023
CYB5D2	ENSG00000167740.10	protein_coding	748.165	0.183334	0.0849505	2.15813	0.0309176	0.666223
TAF13	ENSG00000197780.11	protein_coding	3945.59	0.184752	0.0856683	2.1566	0.031037	0.667542
HEBP2	ENSG00000051620.11	protein_coding	1610.56	-0.428296	0.198645	-2.15609	0.031077	0.667542
HECW2	ENSG00000138411.13	protein_coding	4394.16	-0.301523	0.139937	-2.1547	0.0311854	0.668391
MFGE8	ENSG00000140545.16	protein_coding	5687.28	0.498761	0.231545	2.15406	0.0312355	0.668391
FAM120B	ENSG00000112584.14	protein_coding	2561.09	0.128462	0.0596473	2.1537	0.031264	0.668391
CTSF	ENSG00000174080.12	protein_coding	958.282	0.408039	0.189888	2.14884	0.0316469	0.674692
PSME3IP1	ENSG00000172775.18	protein_coding	3092.84	-0.10777	0.0501559	-2.1487	0.031658	0.674692
ANP32A	ENSG00000140350.15	protein_coding	3961.92	-0.122974	0.0572728	-2.14716	0.0317809	0.676204
MAL2	ENSG00000147676.14	protein_coding	11.1183	1.35172	0.629768	2.14638	0.031843	0.676204
MGAT3	ENSG00000128268.12	protein_coding	5.11678	1.34079	0.625392	2.14392	0.0320393	0.676204
ARL2BP	ENSG00000102931.8	protein_coding	5893.48	0.107325	0.0500766	2.14322	0.0320954	0.676204
SLC25A4	ENSG00000151729.11	protein_coding	881.874	0.217867	0.101672	2.14284	0.0321261	0.676204
AIMP2	ENSG00000106305.10	protein_coding	2085.37	-0.130018	0.0606799	-2.14269	0.0321383	0.676204
IPO11	ENSG00000086200.17	protein_coding	2462.36	-0.159726	0.0745653	-2.1421	0.0321854	0.676204
DOK6	ENSG00000206052.11	protein_coding	138.15	1.01158	0.472309	2.14178	0.0322115	0.676204
DNAJC30	ENSG00000176410.8	protein_coding	1285.16	0.0988429	0.0461589	2.14136	0.0322449	0.676204
SERPINB8	ENSG00000166401.15	protein_coding	2572.74	-0.188533	0.0880579	-2.14101	0.0322731	0.676204
ETS2	ENSG00000157557.13	protein_coding	3134.46	-0.306174	0.143007	-2.14098	0.0322759	0.676204
KAZN	ENSG00000189337.17	protein_coding	1578.67	0.237104	0.110788	2.14016	0.0323421	0.676546
ITGA7	ENSG00000135424.19	protein_coding	3919.92	0.578669	0.270546	2.13889	0.0324443	0.677641
ARL4A	ENSG00000122644.13	protein_coding	918.209	0.253654	0.118645	2.13792	0.0325233	0.678251
KDM4B	ENSG00000127663.16	protein_coding	4546.12	0.275007	0.128755	2.13589	0.0326885	0.679624
PPM1B	ENSG00000138032.21	protein_coding	738.823	-0.131707	0.0616641	-2.13588	0.0326891	0.679624
PIK3R1	ENSG00000145675.16	protein_coding	5767.69	0.313032	0.146658	2.13444	0.0328068	0.680974
MRAS	ENSG00000158186.13	protein_coding	4983.83	0.127444	0.0597248	2.13386	0.0328542	0.680974
UPK3BL2	ENSG00000284981.2	protein_coding	132.432	0.892647	0.418696	2.13197	0.0330094	0.683149
ZNF83	ENSG00000167766.22	protein_coding	28.2549	0.646128	0.303749	2.12718	0.0334054	0.690294
GUCY1B1	ENSG00000061918.14	protein_coding	112.021	0.677347	0.318805	2.12465	0.033616	0.693113
NHS	ENSG00000188158.17	protein_coding	2241.63	0.259287	0.122057	2.12432	0.0336438	0.693113
FAM162A	ENSG00000114023.16	protein_coding	746.085	0.317003	0.149297	2.12331	0.0337278	0.693142
EGR2	ENSG00000122877.18	protein_coding	52.451	1.15918	0.546024	2.12294	0.0337588	0.693142
NAF1	ENSG00000145414.9	protein_coding	991.962	-0.0989665	0.0466568	-2.12116	0.0339084	0.693142
OSBPL2	ENSG00000130703.17	protein_coding	1969.99	0.157218	0.0741189	2.12116	0.0339084	0.693142
PRPH2	ENSG00000112619.8	protein_coding	121.224	-1.38583	0.65348	-2.1207	0.0339471	0.693142
TENT5A	ENSG00000112773.16	protein_coding	2482.1	0.294432	0.138866	2.12027	0.0339836	0.693142
PREX1	ENSG00000124126.14	protein_coding	561.522	-0.421943	0.199031	-2.11998	0.0340074	0.693142
TMEM9	ENSG00000116857.17	protein_coding	2190.78	-0.184614	0.0871095	-2.11934	0.0340621	0.693142
SPTBN4	ENSG00000160460.17	protein_coding	80.9073	0.454508	0.214533	2.11859	0.034125	0.693142
ATP10A	ENSG00000206190.13	protein_coding	1811.82	0.421651	0.199058	2.11824	0.034155	0.693142
TOLLIP	ENSG00000078902.16	protein_coding	3229.89	0.111211	0.0525693	2.1155	0.034387	0.694911
TCTN2	ENSG00000168778.13	protein_coding	607.846	-0.31407	0.148462	-2.1155	0.0343876	0.694911
KCTD9	ENSG00000104756.17	protein_coding	4993.63	-0.089438	0.0422794	-2.1154	0.0343954	0.694911
SH3BP2	ENSG00000087266.18	protein_coding	3637.54	0.145922	0.0690093	2.11453	0.0344699	0.695324
CCDC32	ENSG00000128891.17	protein_coding	615.293	0.233509	0.11046	2.11397	0.0345182	0.695324
TRMT5	ENSG00000126814.7	protein_coding	1320.63	-0.143105	0.0677151	-2.11334	0.0345717	0.695373
FAM217B	ENSG00000196227.11	protein_coding	939.68	-0.209714	0.0993385	-2.11111	0.034763	0.696559
CASC3	ENSG00000108349.18	protein_coding	6439.21	-0.0766496	0.0363104	-2.11095	0.0347764	0.696559
NAA50	ENSG00000121579.14	protein_coding	10865.7	-0.161834	0.0766673	-2.11086	0.0347844	0.696559
PAK1	ENSG00000149269.10	protein_coding	2259.69	-0.184046	0.0872182	-2.11018	0.0348425	0.696697
TMCC3	ENSG00000057704.13	protein_coding	8.6736	-1.51185	0.717291	-2.10772	0.035055	0.699916
KLHDC8B	ENSG00000185909.15	protein_coding	669.338	-0.174652	0.0829468	-2.10559	0.03524	0.701023
STAG2	ENSG00000101972.20	protein_coding	6374.28	-0.125186	0.0594581	-2.10545	0.0352522	0.701023
TSEN2	ENSG00000154743.19	protein_coding	366.899	-0.186162	0.088486	-2.10386	0.035391	0.701023
TCAF1	ENSG00000198420.10	protein_coding	2730.31	0.230229	0.109434	2.10381	0.0353948	0.701023
TIA1	ENSG00000116001.17	protein_coding	2094.05	-0.122217	0.0581166	-2.10297	0.0354687	0.701023
GPD1L	ENSG00000152642.11	protein_coding	792.611	0.20105	0.095649	2.10195	0.0355573	0.701023
ZNF57	ENSG00000171970.14	protein_coding	107.248	-0.283788	0.135042	-2.10148	0.0355991	0.701023
ZDHHC2	ENSG00000104219.13	protein_coding	4073.08	-0.1611	0.0766848	-2.10081	0.035658	0.701023
VAPA	ENSG00000101558.14	protein_coding	9835.02	-0.0882281	0.0420065	-2.10035	0.0356985	0.701023
COMMD2	ENSG00000114744.9	protein_coding	2397.29	-0.156421	0.0744864	-2.09999	0.0357296	0.701023
DCAF5	ENSG00000139990.18	protein_coding	3110.54	0.133451	0.0635631	2.09951	0.0357719	0.701023
MEOX2	ENSG00000106511.6	protein_coding	7.29063	2.36783	1.12841	2.09838	0.0358719	0.701023
VPS26A	ENSG00000122958.15	protein_coding	4667.98	-0.121779	0.0580384	-2.09824	0.0358837	0.701023
DES	ENSG00000175084.13	protein_coding	23.4613	-1.05281	0.501822	-2.09798	0.0359065	0.701023
ZSCAN18	ENSG00000121413.13	protein_coding	1369.06	0.226756	0.108084	2.09795	0.0359092	0.701023
RUNDC1	ENSG00000198863.8	protein_coding	1166.41	0.141076	0.0672542	2.09766	0.0359353	0.701023
TMEM134	ENSG00000172663.9	protein_coding	980.07	0.145686	0.0694773	2.09689	0.0360037	0.701351
USP35	ENSG00000118369.13	protein_coding	730.174	0.158743	0.0757437	2.09579	0.0361005	0.701677
FAM20C	ENSG00000177706.9	protein_coding	5718.7	-0.231572	0.110508	-2.09553	0.0361237	0.701677
CNOT7	ENSG00000198791.12	protein_coding	6537.98	-0.109657	0.0524798	-2.08952	0.0366613	0.707877
NT5C	ENSG00000125458.7	protein_coding	1204.76	-0.138218	0.0661724	-2.08875	0.0367298	0.707877
GSTM5	ENSG00000134201.12	protein_coding	60.7194	-2.315	1.10834	-2.08872	0.0367332	0.707877
RPS6KA1	ENSG00000117676.14	protein_coding	230.234	-0.460222	0.220395	-2.08817	0.0367826	0.707877
JAK3	ENSG00000105639.21	protein_coding	453.819	-0.393756	0.188657	-2.08715	0.0368745	0.707877
PITPNM1	ENSG00000110697.14	protein_coding	2331.09	-0.146486	0.0702028	-2.08661	0.0369234	0.707877
SLC25A34	ENSG00000162461.8	protein_coding	27.6874	0.446502	0.214004	2.08641	0.0369412	0.707877
CEMIP	ENSG00000103888.17	protein_coding	4042.01	-1.08921	0.522349	-2.08522	0.0370492	0.707877
MAP3K10	ENSG00000130758.8	protein_coding	648.427	0.208213	0.09988	2.08463	0.0371025	0.707877
TRAF3IP2	ENSG00000056972.21	protein_coding	1854.86	-0.178523	0.0856498	-2.08434	0.0371296	0.707877
TRPV4	ENSG00000111199.12	protein_coding	350.486	-0.212964	0.102269	-2.08239	0.0373065	0.707877
MZT2B	ENSG00000152082.15	protein_coding	4407.2	0.112415	0.0539867	2.08227	0.0373175	0.707877
MYEF2	ENSG00000104177.20	protein_coding	854.792	0.296311	0.142329	2.08188	0.0373536	0.707877
CTF1	ENSG00000150281.7	protein_coding	557.734	0.177423	0.0852662	2.08081	0.037451	0.707877
GPX3	ENSG00000211445.13	protein_coding	258.554	0.704182	0.33844	2.08067	0.037464	0.707877
GIMAP2	ENSG00000106560.11	protein_coding	52.7017	-0.739669	0.355522	-2.08052	0.0374781	0.707877
ORC2	ENSG00000115942.9	protein_coding	1636.52	-0.130665	0.0628304	-2.07964	0.0375587	0.707877
ZSWIM8	ENSG00000214655.11	protein_coding	5407.8	0.118707	0.0570916	2.07923	0.0375958	0.707877
SGF29	ENSG00000176476.9	protein_coding	398.583	-0.185343	0.0891448	-2.07912	0.037606	0.707877
NUP160	ENSG00000030066.14	protein_coding	3271.45	-0.151454	0.0728659	-2.07852	0.0376612	0.707877
POLR2L	ENSG00000177700.6	protein_coding	6208.41	0.203393	0.0979036	2.07748	0.0377575	0.707877
FAM91A1	ENSG00000176853.16	protein_coding	5599.96	-0.105832	0.0509694	-2.07638	0.0378585	0.707877
MX1	ENSG00000157601.15	protein_coding	216.227	-0.802205	0.386351	-2.07637	0.0378601	0.707877
KRR1	ENSG00000111615.14	protein_coding	2101.5	-0.158288	0.0762433	-2.07609	0.0378859	0.707877
SENP1	ENSG00000079387.15	protein_coding	1790.37	-0.121664	0.0586375	-2.07486	0.0379998	0.707877
TAF4B	ENSG00000141384.13	protein_coding	281.329	-0.26853	0.129424	-2.07481	0.038004	0.707877
GPRC5C	ENSG00000170412.18	protein_coding	42.7587	1.67599	0.80784	2.07465	0.038019	0.707877
LITAF	ENSG00000189067.15	protein_coding	17249.7	0.215314	0.103799	2.07434	0.0380478	0.707877
WASHC5	ENSG00000164961.16	protein_coding	4468.6	-0.0809434	0.0390325	-2.07374	0.0381032	0.707877
RTN4RL2	ENSG00000186907.8	protein_coding	30.6992	-0.61804	0.298302	-2.07186	0.0382782	0.707877
PLXNA3	ENSG00000130827.6	protein_coding	7443.46	0.282379	0.136308	2.07162	0.0383005	0.707877
WASL	ENSG00000106299.8	protein_coding	4411.33	-0.0922854	0.04458	-2.07011	0.0384423	0.707877
RHBDF2	ENSG00000129667.13	protein_coding	393.469	-0.720264	0.347979	-2.06985	0.0384664	0.707877
LRRCC1	ENSG00000133739.16	protein_coding	150.539	-0.412337	0.199259	-2.06935	0.0385134	0.707877
SSBP4	ENSG00000130511.16	protein_coding	3060.25	-0.129083	0.06239	-2.06897	0.0385485	0.707877
CBS	ENSG00000160200.18	protein_coding	342.369	0.76638	0.370504	2.06848	0.038595	0.707877
ARFGEF3	ENSG00000112379.9	protein_coding	94.6622	1.27183	0.614895	2.06837	0.0386053	0.707877
STRA6	ENSG00000137868.19	protein_coding	150.57	-1.05678	0.510995	-2.06809	0.0386313	0.707877
SSR4	ENSG00000180879.14	protein_coding	4047.05	0.121658	0.0588329	2.06785	0.0386538	0.707877
DOCK4	ENSG00000128512.24	protein_coding	998.823	-0.32713	0.158225	-2.0675	0.0386868	0.707877
PPTC7	ENSG00000196850.6	protein_coding	1734.58	-0.123729	0.0598642	-2.06682	0.0387509	0.707877
LENG8	ENSG00000167615.18	protein_coding	3250.9	0.19516	0.0944351	2.06661	0.0387713	0.707877
GOLGA3	ENSG00000090615.16	protein_coding	19537.2	0.158806	0.0768558	2.06629	0.0388013	0.707877
PYGB	ENSG00000100994.12	protein_coding	11166.7	-0.184967	0.0895423	-2.06569	0.0388574	0.707877
CYP51A1	ENSG00000001630.18	protein_coding	316.169	0.255808	0.123846	2.06553	0.038873	0.707877
TSG101	ENSG00000074319.13	protein_coding	3027.94	-0.0931541	0.0451052	-2.06526	0.0388983	0.707877
P4HA1	ENSG00000122884.13	protein_coding	10698.2	0.225067	0.109013	2.06458	0.0389624	0.707877
CCDC92	ENSG00000119242.9	protein_coding	4255.99	0.178969	0.0866979	2.06428	0.0389907	0.707877
CLDN23	ENSG00000253958.2	protein_coding	40.3443	-0.878093	0.425381	-2.06425	0.0389939	0.707877
PSD2	ENSG00000146005.4	protein_coding	15.0406	0.787673	0.381835	2.06286	0.0391257	0.708251
RPS29	ENSG00000213741.11	protein_coding	4935.01	0.171285	0.0830534	2.06235	0.0391742	0.708251
TBCC	ENSG00000124659.7	protein_coding	963.347	-0.149695	0.0725935	-2.0621	0.0391979	0.708251
TMEM145	ENSG00000167619.13	protein_coding	11.4368	-0.631077	0.306075	-2.06184	0.0392229	0.708251
NDUFA3	ENSG00000170906.16	protein_coding	937.402	0.222443	0.10795	2.06061	0.0393406	0.709436
EVI2A	ENSG00000126860.12	protein_coding	67.6273	-0.668734	0.324929	-2.05809	0.039581	0.7105
MED13L	ENSG00000123066.9	protein_coding	10655.2	-0.146676	0.0712997	-2.05717	0.0396697	0.7105
GFM2	ENSG00000164347.18	protein_coding	1450.67	0.135027	0.0656606	2.05643	0.0397408	0.7105
MTERF3	ENSG00000156469.9	protein_coding	462.79	-0.244004	0.118669	-2.05617	0.0397666	0.7105
TRABD2A	ENSG00000186854.11	protein_coding	163.376	0.683284	0.332341	2.05597	0.0397851	0.7105
TAFA2	ENSG00000198673.11	protein_coding	9.49238	0.910778	0.443085	2.05554	0.0398269	0.7105
IFI27L2	ENSG00000119632.4	protein_coding	1667.08	0.184409	0.089716	2.05547	0.0398332	0.7105
ALDH9A1	ENSG00000143149.13	protein_coding	5779.16	0.122858	0.0597953	2.05464	0.0399134	0.7105
NARS1	ENSG00000134440.12	protein_coding	12400.3	-0.127329	0.0619852	-2.05419	0.0399572	0.7105
APOL2	ENSG00000128335.14	protein_coding	2990.23	0.176182	0.0857695	2.05414	0.0399622	0.7105
CHI3L2	ENSG00000064886.14	protein_coding	11.3986	-0.853255	0.415436	-2.05388	0.0399875	0.7105
HYLS1	ENSG00000198331.11	protein_coding	617.364	-0.331821	0.16159	-2.05347	0.0400267	0.7105
SFXN4	ENSG00000183605.17	protein_coding	451.55	-0.149588	0.0729237	-2.0513	0.040238	0.711688
DECR2	ENSG00000242612.7	protein_coding	800.534	0.272348	0.132771	2.05126	0.0402419	0.711688
C10orf90	ENSG00000154493.20	protein_coding	7.79829	1.40832	0.686754	2.0507	0.0402966	0.711688
SOX8	ENSG00000005513.11	protein_coding	11.0001	0.852977	0.415958	2.05063	0.040303	0.711688
SALL1	ENSG00000103449.13	protein_coding	46.4711	1.63327	0.797205	2.04874	0.0404874	0.713621
COL4A5	ENSG00000188153.14	protein_coding	7712.84	0.351752	0.171717	2.04843	0.0405174	0.713621
OSBPL3	ENSG00000070882.13	protein_coding	5296.85	-0.210846	0.103026	-2.04654	0.0407035	0.714297
FAM114A1	ENSG00000197712.12	protein_coding	16211.6	0.0918381	0.0448916	2.04578	0.0407784	0.714297
TBX18	ENSG00000112837.17	protein_coding	996.416	0.822222	0.401924	2.04572	0.0407843	0.714297
ELOVL5	ENSG00000012660.14	protein_coding	10030.6	-0.128374	0.0627619	-2.04542	0.0408136	0.714297
LRRC28	ENSG00000168904.15	protein_coding	658.577	-0.15859	0.077568	-2.04452	0.040902	0.714297
SMIM39	ENSG00000284479.3	protein_coding	4.18891	1.6903	0.826897	2.04415	0.0409386	0.714297
MRPL23	ENSG00000214026.11	protein_coding	959.861	0.613031	0.299929	2.04392	0.0409613	0.714297
COG7	ENSG00000168434.13	protein_coding	1034.47	0.130645	0.0639234	2.04377	0.0409761	0.714297
DDR1	ENSG00000204580.14	protein_coding	3315.17	0.28908	0.141561	2.04208	0.0411432	0.714428
ANO7	ENSG00000146205.15	protein_coding	82.6733	0.474106	0.232175	2.04202	0.0411494	0.714428
CDC25C	ENSG00000158402.21	protein_coding	545.174	-0.594776	0.291322	-2.04165	0.0411866	0.714428
EGR1	ENSG00000120738.8	protein_coding	8925.72	0.750074	0.367481	2.04112	0.0412388	0.714428
FRMD4A	ENSG00000151474.23	protein_coding	3454.27	-0.4204	0.205973	-2.04105	0.0412463	0.714428
GCK	ENSG00000106633.18	protein_coding	11.4975	-0.950817	0.466292	-2.0391	0.04144	0.71687
CTDSPL2	ENSG00000137770.14	protein_coding	2778.5	-0.175706	0.0862021	-2.0383	0.0415195	0.717333
ZNF469	ENSG00000225614.4	protein_coding	7700.42	0.407375	0.200015	2.03672	0.0416778	0.719154
LYL1	ENSG00000104903.5	protein_coding	5.33232	-1.43498	0.704927	-2.03565	0.0417855	0.719586
ACVR1	ENSG00000115170.16	protein_coding	3333.78	-0.126336	0.0620685	-2.03542	0.0418087	0.719586
NOL11	ENSG00000130935.10	protein_coding	2472.21	-0.143801	0.0707408	-2.03279	0.0420741	0.720909
NPR3	ENSG00000113389.16	protein_coding	11116.1	0.457682	0.225162	2.03268	0.0420852	0.720909
PRPSAP1	ENSG00000161542.17	protein_coding	1876	-0.181787	0.0894382	-2.03254	0.042099	0.720909
PCGF5	ENSG00000180628.15	protein_coding	6432.31	-0.102701	0.0505392	-2.0321	0.0421432	0.720909
SPA17	ENSG00000064199.7	protein_coding	318.873	-0.242513	0.119345	-2.03203	0.0421507	0.720909
TMEM229B	ENSG00000198133.9	protein_coding	56.643	0.5255	0.25888	2.0299	0.0423665	0.722716
UNC13A	ENSG00000130477.16	protein_coding	15.5164	-0.821884	0.404941	-2.02964	0.0423936	0.722716
MICALL1	ENSG00000100139.14	protein_coding	6153.42	0.12859	0.063391	2.02851	0.042508	0.722716
PDLIM2	ENSG00000120913.24	protein_coding	2183.88	0.312291	0.153964	2.02834	0.0425253	0.722716
NDEL1	ENSG00000166579.16	protein_coding	3777.76	0.109381	0.0539332	2.02809	0.0425513	0.722716
GADD45A	ENSG00000116717.13	protein_coding	2286.84	0.283376	0.139742	2.02785	0.0425752	0.722716
NAT1	ENSG00000171428.15	protein_coding	233.542	0.287046	0.141642	2.02657	0.0427068	0.723592
MYOZ1	ENSG00000177791.12	protein_coding	100.932	0.701156	0.346027	2.02631	0.0427333	0.723592
PARP16	ENSG00000138617.16	protein_coding	332.695	0.244897	0.120892	2.02574	0.0427911	0.72367
CYB5R2	ENSG00000166394.15	protein_coding	343.905	-0.45557	0.225001	-2.02474	0.0428937	0.724503
PHKA1	ENSG00000067177.15	protein_coding	330.454	-0.515916	0.255028	-2.02298	0.0430753	0.7252
RUSC2	ENSG00000198853.12	protein_coding	8574.6	0.155394	0.0768155	2.02295	0.0430785	0.7252
HSPA13	ENSG00000155304.6	protein_coding	5296.97	-0.165397	0.0817667	-2.02279	0.0430949	0.7252
NUP42	ENSG00000136243.18	protein_coding	624.626	-0.152454	0.075393	-2.02212	0.0431635	0.725456
NAT9	ENSG00000109065.12	protein_coding	817.592	0.17983	0.0889828	2.02095	0.0432846	0.725967
DGAT2	ENSG00000062282.15	protein_coding	54.7423	-0.704731	0.348835	-2.02024	0.0433583	0.725967
SRPX	ENSG00000101955.15	protein_coding	1387.63	-0.34431	0.170475	-2.01971	0.0434134	0.725967
XPR1	ENSG00000143324.14	protein_coding	3424.27	-0.128307	0.0635498	-2.019	0.0434868	0.725967
GPR155	ENSG00000163328.14	protein_coding	381.793	0.248692	0.123188	2.0188	0.0435081	0.725967
MRPL39	ENSG00000154719.14	protein_coding	1085.09	-0.190821	0.094525	-2.01874	0.0435142	0.725967
GORAB	ENSG00000120370.14	protein_coding	603.72	-0.187629	0.0929969	-2.01758	0.0436351	0.727091
SLC25A24	ENSG00000085491.17	protein_coding	4790.21	-0.133672	0.0662862	-2.01659	0.0437379	0.727706
METTL5	ENSG00000138382.15	protein_coding	1276.89	-0.135705	0.0673177	-2.01589	0.0438116	0.727706
NGF	ENSG00000134259.6	protein_coding	1494.05	0.321009	0.15927	2.01551	0.0438515	0.727706
HYPK	ENSG00000242028.9	protein_coding	133.507	0.241535	0.119872	2.01493	0.0439115	0.727706
CCNO	ENSG00000152669.9	protein_coding	9.94508	1.45655	0.722973	2.01467	0.0439396	0.727706
TUBB2B	ENSG00000137285.11	protein_coding	149.29	-0.741536	0.368248	-2.01369	0.0440425	0.727877
SYPL1	ENSG00000008282.10	protein_coding	5647.2	-0.0966231	0.0479865	-2.01355	0.044057	0.727877
TXNL4A	ENSG00000141759.15	protein_coding	2968.2	0.163864	0.0815172	2.01017	0.0444128	0.732865
RAB7B	ENSG00000276600.5	protein_coding	807.488	0.448167	0.223015	2.00958	0.0444758	0.733015
ST6GALNAC3	ENSG00000184005.12	protein_coding	368.432	-0.721362	0.359263	-2.00789	0.0446549	0.733841
GOLGA2	ENSG00000167110.19	protein_coding	4323.81	0.136226	0.0678553	2.00759	0.0446866	0.733841
ENPP1	ENSG00000197594.14	protein_coding	4033.86	-0.335484	0.167198	-2.00651	0.0448014	0.733841
ADGRL2	ENSG00000117114.21	protein_coding	3066.48	0.412766	0.20575	2.00616	0.0448395	0.733841
RHBDL2	ENSG00000158315.11	protein_coding	76.9295	0.599633	0.298904	2.0061	0.0448451	0.733841
PTPRC	ENSG00000081237.22	protein_coding	10.0699	0.82156	0.409539	2.00606	0.0448498	0.733841
AOX1	ENSG00000138356.14	protein_coding	4082.76	0.357118	0.178305	2.00285	0.0451936	0.737829
TEK	ENSG00000120156.22	protein_coding	128.034	-1.13369	0.566062	-2.00277	0.045202	0.737829
SEPTIN10	ENSG00000186522.15	protein_coding	7085.86	-0.117317	0.058602	-2.00192	0.0452934	0.738434
CCDC24	ENSG00000159214.13	protein_coding	99.3615	0.311399	0.155619	2.00103	0.0453891	0.739108
LCLAT1	ENSG00000172954.14	protein_coding	2478.28	-0.247597	0.123882	-1.99866	0.0456457	0.742293
ANKRD1	ENSG00000148677.7	protein_coding	144.291	0.99661	0.498872	1.99773	0.0457462	0.742293
CYP2U1	ENSG00000155016.18	protein_coding	2379.78	0.186195	0.093208	1.99763	0.0457566	0.742293
KCTD7	ENSG00000243335.10	protein_coding	457.61	0.142379	0.0712959	1.99701	0.0458241	0.742293
JCAD	ENSG00000165757.9	protein_coding	2514.78	0.970256	0.48593	1.9967	0.0458576	0.742293
ZNF556	ENSG00000172000.7	protein_coding	63.2698	1.39041	0.697222	1.99422	0.046128	0.743608
POLR2E	ENSG00000099817.12	protein_coding	7452.6	0.0895239	0.0448978	1.99395	0.0461575	0.743608
GSTA4	ENSG00000170899.11	protein_coding	1618.97	0.361718	0.181433	1.99367	0.0461885	0.743608
TIMM23B-AGAP6	ENSG00000178440.9	protein_coding	9.09481	0.853984	0.428361	1.99361	0.0461949	0.743608
ARFIP2	ENSG00000132254.13	protein_coding	2835.81	0.0906684	0.0454874	1.99326	0.0462327	0.743608
ARMC10	ENSG00000170632.14	protein_coding	1591.88	0.100427	0.0504081	1.99229	0.0463394	0.743608
NKTR	ENSG00000114857.19	protein_coding	1656.2	0.132582	0.066584	1.99119	0.0464596	0.743608
CCDC40	ENSG00000141519.15	protein_coding	66.5636	0.322597	0.162088	1.99026	0.0465622	0.743608
MEI1	ENSG00000167077.13	protein_coding	30.8892	-1.02517	0.515196	-1.98986	0.0466063	0.743608
SEM1	ENSG00000127922.10	protein_coding	372.093	0.164754	0.0828016	1.98974	0.0466197	0.743608
ARHGEF5	ENSG00000050327.15	protein_coding	294.62	0.335555	0.168653	1.98961	0.0466338	0.743608
GSTA1	ENSG00000243955.6	protein_coding	87.1455	1.25466	0.630754	1.98915	0.046685	0.743608
ROR1	ENSG00000185483.13	protein_coding	1450.43	0.503953	0.253381	1.98892	0.0467106	0.743608
NUP54	ENSG00000138750.16	protein_coding	1841.32	-0.158799	0.0798684	-1.98826	0.0467834	0.743608
CDKAL1	ENSG00000145996.11	protein_coding	1150.14	-0.205123	0.103169	-1.98822	0.0467876	0.743608
CD63	ENSG00000135404.12	protein_coding	32647.4	0.11175	0.0562279	1.98744	0.0468739	0.743608
MRPS28	ENSG00000147586.10	protein_coding	41.208	0.30337	0.152709	1.98659	0.0469681	0.743608
XYLT1	ENSG00000103489.12	protein_coding	3507.03	-0.270113	0.13606	-1.98525	0.0471163	0.743608
POFUT2	ENSG00000186866.17	protein_coding	3485.5	0.162134	0.0816882	1.9848	0.0471672	0.743608
MMGT1	ENSG00000169446.6	protein_coding	4393.45	-0.112308	0.0565886	-1.98464	0.0471849	0.743608
C4orf3	ENSG00000164096.13	protein_coding	5250.51	0.189659	0.0955773	1.98435	0.0472169	0.743608
TMED9	ENSG00000184840.12	protein_coding	11362.7	0.153526	0.0773802	1.98405	0.0472507	0.743608
MOB1A	ENSG00000114978.18	protein_coding	15629.4	-0.0585666	0.0295199	-1.98397	0.0472589	0.743608
PROCA1	ENSG00000167525.16	protein_coding	11.897	-0.643292	0.324285	-1.98372	0.0472866	0.743608
ORC5	ENSG00000164815.11	protein_coding	977.365	-0.217845	0.109826	-1.98355	0.0473061	0.743608
SH3GL2	ENSG00000107295.10	protein_coding	4.95737	1.36225	0.687224	1.98225	0.0474512	0.745021
NEIL1	ENSG00000140398.14	protein_coding	19.4587	0.744963	0.376121	1.98065	0.0476309	0.745021
RTN4IP1	ENSG00000130347.13	protein_coding	283.716	-0.260261	0.131403	-1.98064	0.047632	0.745021
CAPS2	ENSG00000180881.21	protein_coding	75.913	0.317073	0.160099	1.98049	0.0476486	0.745021
HAUS4	ENSG00000092036.19	protein_coding	192.853	-0.260325	0.131458	-1.9803	0.0476699	0.745021
BCL2	ENSG00000171791.14	protein_coding	269.145	-0.421238	0.212792	-1.97957	0.0477517	0.745442
MDFI	ENSG00000112559.15	protein_coding	15.5078	-1.36885	0.692072	-1.9779	0.0479404	0.747529
RIMOC1	ENSG00000205765.10	protein_coding	4681.94	-0.084812	0.0429299	-1.97559	0.0482008	0.750729
CNOT9	ENSG00000144580.15	protein_coding	4808.74	-0.139609	0.0706869	-1.97504	0.0482635	0.750845
BTG3	ENSG00000154640.15	protein_coding	1216.86	-0.270597	0.137055	-1.97436	0.0483404	0.750943
SERF2	ENSG00000140264.22	protein_coding	22075.9	0.125821	0.0637388	1.97401	0.0483802	0.750943
BAIAP2	ENSG00000175866.16	protein_coding	1283.06	0.268192	0.135936	1.97292	0.0485044	0.751593
TOE1	ENSG00000132773.12	protein_coding	630.814	-0.23748	0.120421	-1.97207	0.0486014	0.751593
TMEM219	ENSG00000149932.17	protein_coding	2405.65	0.115714	0.0586794	1.97197	0.0486135	0.751593
EME2	ENSG00000197774.14	protein_coding	632.917	0.20115	0.102026	1.97156	0.0486598	0.751593
KYAT1	ENSG00000171097.14	protein_coding	3.26045	1.28988	0.654353	1.97122	0.0486985	0.751593
CFAP69	ENSG00000105792.19	protein_coding	60.7694	-0.606886	0.308156	-1.96941	0.0489055	0.753932
ZNF507	ENSG00000168813.17	protein_coding	1823.08	-0.0964696	0.04901	-1.96837	0.0490259	0.754352
KIFAP3	ENSG00000075945.13	protein_coding	1879.56	-0.130492	0.066302	-1.96814	0.0490521	0.754352
FBXL13	ENSG00000161040.19	protein_coding	22.6226	0.493219	0.250654	1.96773	0.0490992	0.754352
PLXNB3	ENSG00000198753.12	protein_coding	542.08	0.455269	0.231433	1.96718	0.0491629	0.754479
LARS2	ENSG00000011376.12	protein_coding	2141.8	0.115422	0.0587198	1.96563	0.0493408	0.754759
TTLL4	ENSG00000135912.11	protein_coding	1034.48	-0.211297	0.107533	-1.96495	0.0494195	0.754759
KIF18A	ENSG00000121621.7	protein_coding	1371.42	-0.447035	0.227557	-1.9645	0.0494719	0.754759
NEK3	ENSG00000136098.18	protein_coding	296.931	-0.221703	0.112867	-1.96428	0.0494975	0.754759
NUDT14	ENSG00000183828.15	protein_coding	171.503	0.298365	0.151909	1.9641	0.0495189	0.754759
GPR176	ENSG00000166073.12	protein_coding	14348.9	-0.181235	0.0922871	-1.96382	0.0495514	0.754759
PGAP4	ENSG00000165152.9	protein_coding	720.617	-0.529391	0.269594	-1.96366	0.0495698	0.754759
GTF3C3	ENSG00000119041.11	protein_coding	1754.52	-0.0973943	0.0496693	-1.96086	0.0498958	0.754804
IRAK2	ENSG00000134070.5	protein_coding	535.434	-0.343928	0.175434	-1.96044	0.0499444	0.754804
LTB4R	ENSG00000213903.9	protein_coding	72.1226	0.335563	0.171193	1.96014	0.0499797	0.754804
HECW1	ENSG00000002746.15	protein_coding	36.1707	1.18974	0.607072	1.9598	0.0500195	0.754804
TSEN15	ENSG00000198860.14	protein_coding	3215.86	-0.170346	0.0869407	-1.95934	0.0500731	0.754804
CCDC112	ENSG00000164221.13	protein_coding	202.745	0.23313	0.119016	1.95882	0.0501339	0.754804
PTPN22	ENSG00000134242.16	protein_coding	48.4123	-0.914188	0.466751	-1.95862	0.0501573	0.754804
NME2	ENSG00000243678.12	protein_coding	81.4643	-0.764535	0.390458	-1.95805	0.0502245	0.754804
NIPSNAP2	ENSG00000146729.10	protein_coding	2664.34	-0.124418	0.0635429	-1.95801	0.0502287	0.754804
LSM6	ENSG00000164167.12	protein_coding	269.819	-0.207497	0.106012	-1.95729	0.0503134	0.754804
NCKAP1	ENSG00000061676.16	protein_coding	19454.9	-0.0762052	0.0389524	-1.95637	0.0504221	0.754804
TRAM1	ENSG00000067167.8	protein_coding	35496.3	0.13227	0.0676205	1.95606	0.050458	0.754804
TCF12	ENSG00000140262.18	protein_coding	9724.09	-0.120254	0.0614822	-1.95591	0.0504756	0.754804
PPFIBP1	ENSG00000110841.14	protein_coding	5570.34	-0.147878	0.0756259	-1.95538	0.0505379	0.754804
ZNF707	ENSG00000181135.16	protein_coding	511.267	0.158866	0.0812468	1.95534	0.0505424	0.754804
HINT3	ENSG00000111911.7	protein_coding	1915.07	0.148639	0.0760351	1.95488	0.0505976	0.754804
DEK	ENSG00000124795.17	protein_coding	10853.6	-0.193068	0.0987628	-1.95486	0.0505993	0.754804
SLC2A3	ENSG00000059804.18	protein_coding	4370.65	0.252109	0.128995	1.95442	0.0506518	0.754804
GREB1L	ENSG00000141449.16	protein_coding	243.648	0.989621	0.506392	1.95426	0.0506705	0.754804
EHD1	ENSG00000110047.18	protein_coding	13628.1	0.231998	0.11873	1.95399	0.0507024	0.754804
SLC9A6	ENSG00000198689.13	protein_coding	2408.06	-0.137015	0.0701465	-1.95327	0.0507877	0.754804
LIN54	ENSG00000189308.11	protein_coding	1947.77	-0.200195	0.102503	-1.95307	0.0508109	0.754804
SEC14L6	ENSG00000214491.9	protein_coding	6.95399	1.55911	0.798454	1.95266	0.0508602	0.754804
SSTR1	ENSG00000139874.6	protein_coding	4208.42	0.43775	0.224225	1.95228	0.050905	0.754804
TFAP2A	ENSG00000137203.15	protein_coding	5764.45	0.174062	0.0891962	1.95145	0.0510031	0.755434
ULBP1	ENSG00000111981.5	protein_coding	175.71	-0.833575	0.427334	-1.95064	0.0511001	0.756049
MEA1	ENSG00000124733.5	protein_coding	2158.38	0.110326	0.0565839	1.94978	0.0512027	0.756742
ZNF512B	ENSG00000196700.9	protein_coding	5102.91	0.12439	0.0638423	1.9484	0.0513673	0.757971
ZNF229	ENSG00000278318.5	protein_coding	662.886	0.208584	0.107096	1.94763	0.051459	0.757971
MMP14	ENSG00000157227.14	protein_coding	31912.1	-0.279845	0.14372	-1.94715	0.0515171	0.757971
SEC22B	ENSG00000265808.4	protein_coding	9361.41	0.171354	0.0880763	1.94552	0.051713	0.757971
CEP20	ENSG00000133393.13	protein_coding	2876.11	-0.126614	0.0650813	-1.94548	0.0517169	0.757971
TRMT13	ENSG00000122435.11	protein_coding	544.586	-0.135475	0.0696442	-1.94525	0.0517454	0.757971
GPR137	ENSG00000173264.16	protein_coding	1627.19	0.0915353	0.0470619	1.945	0.0517754	0.757971
CTTN	ENSG00000085733.16	protein_coding	17713	0.12937	0.0665239	1.94472	0.0518091	0.757971
LIN52	ENSG00000205659.12	protein_coding	438.411	-0.20814	0.107047	-1.94438	0.0518496	0.757971
MYH3	ENSG00000109063.15	protein_coding	24.1085	0.597498	0.3073	1.94434	0.0518539	0.757971
ESPL1	ENSG00000135476.12	protein_coding	1501.78	-0.386963	0.199094	-1.94362	0.0519412	0.757971
TINCR	ENSG00000223573.7	protein_coding	6.50435	-0.811025	0.417325	-1.94339	0.051969	0.757971
NEK2	ENSG00000117650.13	protein_coding	1388.87	-0.425994	0.21924	-1.94305	0.0520105	0.757971
SNRPN	ENSG00000128739.23	protein_coding	1878.02	0.161161	0.0829977	1.94175	0.0521672	0.759441
OSBPL6	ENSG00000079156.17	protein_coding	1164.1	-0.207578	0.106928	-1.94128	0.0522244	0.75946
ZNF699	ENSG00000196110.8	protein_coding	760.395	0.262842	0.135436	1.94071	0.0522933	0.75965
MKRN3	ENSG00000179455.10	protein_coding	5.39089	-2.15327	1.11032	-1.93932	0.0524621	0.760445
RAC1	ENSG00000136238.20	protein_coding	17092.4	-0.0561393	0.0289775	-1.93734	0.0527036	0.760445
MATCAP2	ENSG00000164542.13	protein_coding	261.936	0.32739	0.168994	1.93729	0.0527097	0.760445
TEX2	ENSG00000136478.9	protein_coding	8104.79	0.155643	0.0803432	1.93722	0.0527182	0.760445
B4GALT7	ENSG00000027847.14	protein_coding	1247.74	0.128196	0.0662481	1.93509	0.052979	0.760445
GPHN	ENSG00000171723.16	protein_coding	830.978	-0.135375	0.069975	-1.93463	0.0530362	0.760445
RELB	ENSG00000104856.15	protein_coding	1625.27	-0.278982	0.144274	-1.93369	0.0531508	0.760445
NAPB	ENSG00000125814.17	protein_coding	388.679	0.193151	0.0998931	1.93358	0.0531648	0.760445
NUDT18	ENSG00000275074.3	protein_coding	547.101	0.278988	0.144293	1.93348	0.0531769	0.760445
CCZ1	ENSG00000122674.12	protein_coding	714.647	-0.296782	0.153497	-1.93348	0.0531774	0.760445
DPY19L4	ENSG00000156162.16	protein_coding	2592.58	-0.121736	0.0629655	-1.93337	0.0531908	0.760445
RBPJ	ENSG00000168214.22	protein_coding	6547.93	-0.158329	0.0819025	-1.93314	0.0532192	0.760445
ARFGAP1	ENSG00000101199.13	protein_coding	5190.41	0.117045	0.0605509	1.933	0.0532359	0.760445
UBE2G1	ENSG00000132388.13	protein_coding	4901.31	-0.115635	0.0598261	-1.93285	0.0532546	0.760445
H3C8	ENSG00000273983.2	protein_coding	4114.54	-0.418795	0.216701	-1.93259	0.0532865	0.760445
UBE2I	ENSG00000103275.22	protein_coding	6894.11	-0.0914867	0.0473391	-1.93258	0.0532875	0.760445
DOK1	ENSG00000115325.14	protein_coding	1002.16	-0.25064	0.129698	-1.93249	0.0532988	0.760445
CHRM3	ENSG00000133019.12	protein_coding	8.15935	2.38627	1.23557	1.93131	0.0534444	0.761556
ZG16B	ENSG00000162078.12	protein_coding	31.3514	1.56274	0.809463	1.93059	0.0535341	0.761556
BCS1L	ENSG00000074582.15	protein_coding	911.057	-0.13612	0.0705426	-1.92962	0.0536539	0.761556
TUSC2	ENSG00000114383.10	protein_coding	828.793	0.112943	0.0585493	1.92903	0.0537272	0.761556
GSE1	ENSG00000131149.19	protein_coding	4000.51	0.145461	0.0754107	1.92892	0.0537407	0.761556
RABEP1	ENSG00000029725.17	protein_coding	3801.27	0.163135	0.0845902	1.92854	0.0537884	0.761556
BRD3OS	ENSG00000235106.11	protein_coding	2033.62	0.156312	0.0810567	1.92843	0.0538014	0.761556
TRPV2	ENSG00000187688.15	protein_coding	1831.79	-1.19348	0.618947	-1.92824	0.0538248	0.761556
ERI1	ENSG00000104626.15	protein_coding	1612.08	-0.252593	0.131083	-1.92696	0.0539842	0.762591
SGCB	ENSG00000163069.13	protein_coding	6223.92	-0.0810502	0.0420802	-1.92609	0.0540931	0.762591
LYSMD4	ENSG00000183060.16	protein_coding	269.766	0.213727	0.110964	1.92608	0.0540942	0.762591
TMEM51	ENSG00000171729.14	protein_coding	453.051	-0.289106	0.150131	-1.92569	0.0541434	0.762591
TSPAN9	ENSG00000011105.14	protein_coding	4019.38	0.259549	0.134802	1.92541	0.0541784	0.762591
ZNF547	ENSG00000152433.15	protein_coding	80.8622	0.227021	0.117958	1.92458	0.0542816	0.763254
OGFR	ENSG00000060491.17	protein_coding	2447.49	0.0837872	0.043547	1.92407	0.0543463	0.763375
ZNF44	ENSG00000197857.16	protein_coding	387.19	0.215752	0.112167	1.92349	0.0544187	0.763602
DCDC2	ENSG00000146038.12	protein_coding	6.43514	1.26658	0.658728	1.92277	0.0545088	0.763897
CLEC14A	ENSG00000176435.7	protein_coding	18.0256	-1.90047	0.988576	-1.92243	0.054552	0.763897
RWDD2B	ENSG00000156253.7	protein_coding	1485.09	-0.170377	0.0886634	-1.92162	0.0546537	0.764469
GMPS	ENSG00000163655.16	protein_coding	5608.33	-0.13617	0.0708775	-1.92121	0.0547053	0.764469
B3GALNT2	ENSG00000162885.14	protein_coding	3249.96	-0.138937	0.072357	-1.92016	0.0548383	0.764688
SMUG1	ENSG00000123415.16	protein_coding	728.211	0.165965	0.0864615	1.91952	0.0549181	0.764688
TFAP2E	ENSG00000116819.9	protein_coding	37.0463	-0.50161	0.261383	-1.91906	0.0549763	0.764688
NOL10	ENSG00000115761.17	protein_coding	2444.78	-0.10146	0.0528981	-1.91804	0.0551065	0.764688
RAG1	ENSG00000166349.11	protein_coding	50.8509	-0.564105	0.294108	-1.91802	0.055108	0.764688
LMNTD2	ENSG00000185522.9	protein_coding	25.6451	0.525506	0.274026	1.91772	0.055146	0.764688
RFWD3	ENSG00000168411.14	protein_coding	3158.63	-0.383115	0.199783	-1.91765	0.0551554	0.764688
METTL15	ENSG00000169519.21	protein_coding	986.103	-0.110521	0.0576375	-1.91753	0.0551709	0.764688
IGFBP5	ENSG00000115461.5	protein_coding	284747	0.736045	0.384067	1.91645	0.055308	0.765808
STAG1	ENSG00000118007.13	protein_coding	5181.7	-0.140238	0.0732312	-1.915	0.0554924	0.766823
PTP4A2	ENSG00000184007.22	protein_coding	18226.4	-0.0735388	0.0384105	-1.91455	0.05555	0.766823
SF3B3	ENSG00000189091.13	protein_coding	15684.6	-0.0974933	0.0509224	-1.91455	0.0555505	0.766823
CALB2	ENSG00000172137.19	protein_coding	28.9425	-1.1095	0.579953	-1.91309	0.0557368	0.768288
MAU2	ENSG00000129933.21	protein_coding	2226.1	0.107897	0.056416	1.91253	0.0558084	0.768288
TPP2	ENSG00000134900.13	protein_coding	3890.68	-0.0953453	0.0498642	-1.9121	0.0558632	0.768288
FAM200B	ENSG00000237765.8	protein_coding	428.562	-0.143162	0.0749359	-1.91045	0.0560747	0.768288
CEP57	ENSG00000166037.11	protein_coding	1794.14	-0.233181	0.122061	-1.91037	0.056086	0.768288
BCL2L13	ENSG00000099968.18	protein_coding	5267.11	0.0892218	0.0467234	1.90957	0.0561881	0.768288
FOXS1	ENSG00000179772.8	protein_coding	4.29497	1.8805	0.984979	1.90918	0.0562394	0.768288
GAS2L3	ENSG00000139354.11	protein_coding	2510.88	-0.35691	0.186946	-1.90916	0.0562413	0.768288
SLC6A15	ENSG00000072041.18	protein_coding	67.617	-1.26647	0.663397	-1.90907	0.0562532	0.768288
C4orf46	ENSG00000205208.5	protein_coding	1875.27	-0.303895	0.159188	-1.90903	0.0562581	0.768288
PPP1R37	ENSG00000104866.11	protein_coding	1909.49	0.143714	0.0752874	1.90887	0.0562782	0.768288
ZNF316	ENSG00000205903.7	protein_coding	2020.29	0.122387	0.0641372	1.9082	0.0563655	0.7685
PNPLA2	ENSG00000177666.17	protein_coding	5043.35	0.180846	0.0947888	1.90788	0.0564068	0.7685
CD276	ENSG00000103855.18	protein_coding	7197.1	0.135518	0.0710536	1.90726	0.0564873	0.768645
PURA	ENSG00000185129.8	protein_coding	6380.32	0.15541	0.081516	1.90649	0.0565865	0.768645
AKAP12	ENSG00000131016.17	protein_coding	10539.3	0.512904	0.269031	1.90649	0.056587	0.768645
TUSC1	ENSG00000198680.6	protein_coding	686.758	-0.237119	0.124404	-1.90604	0.0566444	0.768657
ZBTB6	ENSG00000186130.5	protein_coding	1092.8	-0.0969735	0.0508911	-1.90551	0.0567137	0.768806
LINS1	ENSG00000140471.17	protein_coding	313.654	-0.14431	0.0757646	-1.90471	0.0568172	0.768806
INPP1	ENSG00000151689.13	protein_coding	837.016	-0.122168	0.0641417	-1.90465	0.056825	0.768806
ZNF335	ENSG00000198026.8	protein_coding	1390.9	0.0815611	0.0428527	1.90329	0.0570025	0.770045
SCAPER	ENSG00000140386.13	protein_coding	422.461	0.190816	0.100284	1.90276	0.0570716	0.770045
MARS1	ENSG00000166986.15	protein_coding	14220.4	-0.150534	0.0791182	-1.90265	0.0570865	0.770045
C11orf68	ENSG00000175573.7	protein_coding	5754.72	-0.0931749	0.0489974	-1.90163	0.0572194	0.771073
SOCS4	ENSG00000180008.9	protein_coding	3332.48	-0.138516	0.072892	-1.90029	0.0573955	0.77219
MPP2	ENSG00000108852.16	protein_coding	226.356	-0.291657	0.153493	-1.90013	0.0574159	0.77219
MEDAG	ENSG00000102802.10	protein_coding	44.1261	0.917751	0.483233	1.89919	0.0575394	0.773086
MRPL35	ENSG00000132313.15	protein_coding	1673.6	-0.15199	0.0800599	-1.89845	0.0576369	0.773631
VOPP1	ENSG00000154978.13	protein_coding	3214.38	-0.177086	0.0933161	-1.8977	0.0577351	0.774065
CAPSL	ENSG00000152611.12	protein_coding	18.9168	0.634738	0.334541	1.89734	0.0577832	0.774065
TRPS1	ENSG00000104447.13	protein_coding	8249.09	-0.219346	0.115633	-1.89691	0.05784	0.774065
NKAPL	ENSG00000189134.4	protein_coding	37.7257	-0.527027	0.277928	-1.89628	0.0579235	0.774421
SLC25A32	ENSG00000164933.13	protein_coding	123.797	0.20001	0.105528	1.89533	0.0580485	0.77533
ALS2CL	ENSG00000178038.17	protein_coding	175.384	0.566928	0.299274	1.89434	0.0581794	0.775964
ZMYND15	ENSG00000141497.14	protein_coding	15.3215	0.767125	0.405184	1.89327	0.0583214	0.775964
FCHSD2	ENSG00000137478.15	protein_coding	4185.88	-0.110854	0.0585536	-1.8932	0.0583308	0.775964
MRPL10	ENSG00000159111.13	protein_coding	1796	-0.0856632	0.0452507	-1.89308	0.058347	0.775964
TPRKB	ENSG00000144034.16	protein_coding	522.892	-0.232265	0.122735	-1.8924	0.0584371	0.775964
ZNF667	ENSG00000198046.13	protein_coding	258.899	0.314585	0.166258	1.89216	0.0584703	0.775964
RASIP1	ENSG00000105538.10	protein_coding	134.485	-1.29161	0.682802	-1.89164	0.0585393	0.775964
ZFHX2	ENSG00000136367.15	protein_coding	565.538	0.56231	0.297334	1.89117	0.058601	0.775964
GLCE	ENSG00000138604.10	protein_coding	1453.05	-0.245128	0.129684	-1.89019	0.0587323	0.775964
MBTPS2	ENSG00000012174.12	protein_coding	3010.75	-0.140612	0.0743904	-1.89019	0.0587328	0.775964
CLINT1	ENSG00000113282.14	protein_coding	5420.21	0.0771055	0.0408024	1.88973	0.0587942	0.775964
CENPA	ENSG00000115163.15	protein_coding	1006.78	-0.454922	0.240771	-1.88944	0.0588332	0.775964
ALDH7A1	ENSG00000164904.18	protein_coding	5461.31	0.284418	0.150556	1.88912	0.0588752	0.775964
C2orf88	ENSG00000187699.10	protein_coding	37.603	-0.502615	0.26614	-1.88854	0.0589538	0.775964
NPIPB3	ENSG00000169246.17	protein_coding	22.8521	0.564612	0.298972	1.88851	0.0589572	0.775964
SLC2A9	ENSG00000109667.12	protein_coding	52.975	0.71195	0.377067	1.88813	0.0590091	0.775964
CX3CL1	ENSG00000006210.7	protein_coding	5.53911	1.65606	0.878037	1.8861	0.0592819	0.776972
KLHL22	ENSG00000099910.17	protein_coding	1059.95	0.109707	0.0581734	1.88586	0.0593139	0.776972
ZNF580	ENSG00000213015.9	protein_coding	2352.24	0.122569	0.0650286	1.88485	0.0594495	0.776972
RBBP4	ENSG00000162521.19	protein_coding	6732.35	-0.105937	0.0562237	-1.88421	0.059536	0.776972
GRHPR	ENSG00000137106.18	protein_coding	3581.95	0.119374	0.0633731	1.88368	0.0596086	0.776972
GARNL3	ENSG00000136895.19	protein_coding	33.7846	0.458047	0.243183	1.88355	0.0596261	0.776972
ELMOD2	ENSG00000179387.10	protein_coding	2086.23	-0.12979	0.068921	-1.88317	0.0596774	0.776972
ZNF519	ENSG00000175322.12	protein_coding	114.905	-0.473464	0.251508	-1.8825	0.0597687	0.776972
CSE1L	ENSG00000124207.17	protein_coding	10731.6	-0.200629	0.106594	-1.88217	0.0598126	0.776972
PLA2G4C	ENSG00000105499.14	protein_coding	169.812	0.666025	0.353964	1.88162	0.0598881	0.776972
SERHL2	ENSG00000183569.18	protein_coding	40.7629	0.487191	0.258924	1.8816	0.0598903	0.776972
CFAP157	ENSG00000160401.15	protein_coding	5.88551	0.912021	0.484764	1.88137	0.0599216	0.776972
RAB24	ENSG00000169228.14	protein_coding	620.635	0.1724	0.0916498	1.88107	0.059962	0.776972
EMP2	ENSG00000213853.10	protein_coding	1799.54	-0.355712	0.189127	-1.88081	0.0599976	0.776972
ERGIC3	ENSG00000125991.21	protein_coding	7921.04	0.14911	0.0792841	1.8807	0.0600121	0.776972
POLR2J3	ENSG00000285437.2	protein_coding	70.2378	0.474385	0.252413	1.8794	0.0601899	0.776972
GPR146	ENSG00000164849.10	protein_coding	48.3195	0.679954	0.361953	1.87857	0.0603036	0.776972
FAIM	ENSG00000158234.13	protein_coding	297.027	-0.172211	0.091694	-1.8781	0.0603672	0.776972
MYO1D	ENSG00000176658.17	protein_coding	9809.09	-0.236079	0.125703	-1.87807	0.0603709	0.776972
TNPO3	ENSG00000064419.14	protein_coding	5337.03	-0.102002	0.0543275	-1.87754	0.0604446	0.776972
NUTM2E	ENSG00000228570.8	protein_coding	30.1082	0.539682	0.28748	1.87728	0.0604794	0.776972
LAMTOR4	ENSG00000188186.11	protein_coding	883.309	0.193437	0.103105	1.87611	0.0606398	0.776972
TPBG	ENSG00000146242.9	protein_coding	6926.8	-0.148148	0.0789767	-1.87584	0.060677	0.776972
NDUFB2	ENSG00000090266.13	protein_coding	1707.3	0.137744	0.0734445	1.87548	0.0607265	0.776972
TTC3	ENSG00000182670.14	protein_coding	20994.9	0.13875	0.0740218	1.87445	0.0608683	0.776972
RPS6KL1	ENSG00000198208.12	protein_coding	13.9393	-0.995113	0.530921	-1.87431	0.0608873	0.776972
RAB13	ENSG00000143545.10	protein_coding	804.278	0.186712	0.0996375	1.87392	0.0609421	0.776972
CLTB	ENSG00000175416.16	protein_coding	4375.29	0.132588	0.0707731	1.87342	0.0610108	0.776972
PHLDB1	ENSG00000019144.20	protein_coding	7385.6	0.188845	0.100812	1.87323	0.0610361	0.776972
ZSCAN16	ENSG00000196812.6	protein_coding	46.0314	0.318314	0.16998	1.87265	0.0611166	0.776972
CERCAM	ENSG00000167123.20	protein_coding	13453.5	0.191833	0.10244	1.87263	0.06112	0.776972
UBA2	ENSG00000126261.13	protein_coding	5036.61	-0.13538	0.0723066	-1.87231	0.0611642	0.776972
SMC2	ENSG00000136824.19	protein_coding	3255.96	-0.291052	0.155491	-1.87182	0.0612311	0.776972
CENPP	ENSG00000188312.15	protein_coding	392.098	-0.373093	0.199378	-1.87128	0.0613058	0.776972
ZNF470	ENSG00000197016.12	protein_coding	721.765	0.185598	0.0991944	1.87106	0.0613371	0.776972
SLC35E1	ENSG00000127526.15	protein_coding	4454.88	0.160326	0.0856885	1.87104	0.0613401	0.776972
MAP4K2	ENSG00000168067.12	protein_coding	772.737	-0.16384	0.087609	-1.87012	0.0614667	0.776972
ENSG00000285816	ENSG00000285816.1	protein_coding	43.7403	0.416862	0.22291	1.87009	0.0614713	0.776972
ZNF439	ENSG00000171291.9	protein_coding	168.967	0.290661	0.155509	1.8691	0.0616094	0.776972
FBXO15	ENSG00000141665.13	protein_coding	5.28751	-1.13779	0.609046	-1.86814	0.061742	0.776972
POU6F1	ENSG00000184271.18	protein_coding	593.567	-0.311778	0.166914	-1.86789	0.0617769	0.776972
ENSG00000275778	ENSG00000275778.3	protein_coding	68.9036	0.365786	0.19583	1.86788	0.0617791	0.776972
HSPB8	ENSG00000152137.8	protein_coding	327.87	1.2418	0.664852	1.86779	0.0617919	0.776972
HFE	ENSG00000010704.20	protein_coding	834.185	0.148114	0.0793123	1.86747	0.0618355	0.776972
SDC4	ENSG00000124145.6	protein_coding	34412.1	0.197438	0.105732	1.86735	0.0618533	0.776972
SMARCD1	ENSG00000066117.15	protein_coding	4047.65	-0.0984974	0.052758	-1.86697	0.0619064	0.776972
QSOX2	ENSG00000165661.18	protein_coding	1819.4	-0.206364	0.110547	-1.86675	0.061937	0.776972
ZNF652	ENSG00000198740.9	protein_coding	3584.94	0.113541	0.0608354	1.86637	0.06199	0.776972
NAA60	ENSG00000122390.19	protein_coding	2802.26	0.114838	0.061568	1.86522	0.0621501	0.776972
PLCXD2	ENSG00000240891.8	protein_coding	551.72	0.295884	0.158649	1.86503	0.0621778	0.776972
MEGF9	ENSG00000106780.9	protein_coding	769.925	0.181944	0.0975613	1.86492	0.0621928	0.776972
AUP1	ENSG00000115307.17	protein_coding	3875.7	-0.131558	0.0705487	-1.86478	0.0622119	0.776972
GCA	ENSG00000115271.11	protein_coding	73.7547	0.416819	0.223528	1.86473	0.0622194	0.776972
YWHAQ	ENSG00000134308.14	protein_coding	31692.2	-0.124899	0.0670085	-1.86393	0.0623321	0.776972
RILPL1	ENSG00000188026.13	protein_coding	1278.64	0.138415	0.0742653	1.86379	0.0623508	0.776972
RYK	ENSG00000163785.14	protein_coding	6043.2	-0.110589	0.0593572	-1.86311	0.0624474	0.776972
DNAAF9	ENSG00000088854.13	protein_coding	1338.03	0.150737	0.0809065	1.86311	0.0624474	0.776972
LFNG	ENSG00000106003.14	protein_coding	333.283	0.778803	0.418048	1.86295	0.0624692	0.776972
NME4	ENSG00000103202.13	protein_coding	4528.13	0.11252	0.0604073	1.86269	0.0625065	0.776972
SAMD12	ENSG00000177570.15	protein_coding	581.594	0.466281	0.250341	1.86258	0.0625207	0.776972
HK2	ENSG00000159399.10	protein_coding	6885.9	0.216438	0.116263	1.86163	0.0626559	0.776972
CNST	ENSG00000162852.14	protein_coding	5015.11	-0.137251	0.073728	-1.86159	0.0626611	0.776972
COX19	ENSG00000240230.6	protein_coding	477.978	0.155898	0.0837526	1.86141	0.0626857	0.776972
C3orf70	ENSG00000187068.3	protein_coding	118.226	0.941166	0.505894	1.8604	0.0628287	0.777305
ROMO1	ENSG00000125995.16	protein_coding	1690.34	0.166175	0.0893225	1.8604	0.0628294	0.777305
GPBP1	ENSG00000062194.16	protein_coding	2996.58	-0.117508	0.0631761	-1.86001	0.0628842	0.777305
ULK4	ENSG00000168038.11	protein_coding	359.822	0.413296	0.222403	1.85832	0.0631234	0.779093
CHPT1	ENSG00000111666.11	protein_coding	1180.75	-0.194548	0.104712	-1.85793	0.0631787	0.779093
LRFN1	ENSG00000128011.5	protein_coding	61.4687	-0.523973	0.282087	-1.85749	0.0632415	0.779093
CACHD1	ENSG00000158966.16	protein_coding	738.852	-0.234666	0.126343	-1.85737	0.0632579	0.779093
GJC1	ENSG00000182963.11	protein_coding	6428.22	-0.263125	0.141734	-1.85648	0.0633854	0.779712
DARS2	ENSG00000117593.12	protein_coding	2160.68	-0.180894	0.0974585	-1.85611	0.063438	0.779712
FUNDC1	ENSG00000069509.6	protein_coding	379.451	-0.124867	0.0673286	-1.85459	0.0636552	0.779712
GAD1	ENSG00000128683.14	protein_coding	7.13107	1.30634	0.704566	1.85411	0.0637239	0.779712
TAGLN	ENSG00000149591.17	protein_coding	102531	0.271356	0.146354	1.8541	0.0637243	0.779712
RFNG	ENSG00000169733.12	protein_coding	1861.05	0.12186	0.0657615	1.85307	0.063873	0.779712
NUMBL	ENSG00000105245.9	protein_coding	3283.17	0.156372	0.0843972	1.85281	0.0639094	0.779712
PRMT3	ENSG00000185238.13	protein_coding	990.679	-0.153203	0.0826951	-1.85262	0.0639366	0.779712
TMEM200B	ENSG00000253304.2	protein_coding	888.093	-0.219664	0.118573	-1.85257	0.0639435	0.779712
RNFT1	ENSG00000189050.16	protein_coding	237.233	-0.162674	0.0878147	-1.85247	0.0639585	0.779712
CROCC	ENSG00000058453.17	protein_coding	686.85	0.21155	0.114213	1.85225	0.0639906	0.779712
NEURL1	ENSG00000107954.11	protein_coding	43.1819	0.465429	0.251424	1.85117	0.0641455	0.779712
COL14A1	ENSG00000187955.13	protein_coding	37.8125	0.681845	0.368404	1.85081	0.0641973	0.779712
GOT1	ENSG00000120053.12	protein_coding	2555.29	-0.134734	0.0728051	-1.85061	0.0642255	0.779712
CHCHD4	ENSG00000163528.13	protein_coding	457.186	-0.137725	0.0744231	-1.85056	0.0642323	0.779712
DNAAF8	ENSG00000166246.14	protein_coding	40.7745	0.337255	0.18225	1.85051	0.0642397	0.779712
DCAF16	ENSG00000163257.11	protein_coding	1868.89	-0.156288	0.084487	-1.84985	0.0643353	0.779712
C14orf132	ENSG00000227051.7	protein_coding	2498.71	-0.432242	0.233668	-1.84981	0.0643404	0.779712
C16orf87	ENSG00000155330.10	protein_coding	784.666	0.173855	0.0941816	1.84596	0.0648982	0.785064
PON2	ENSG00000105854.13	protein_coding	2166.79	0.210675	0.11415	1.84559	0.0649514	0.785064
COP1	ENSG00000143207.21	protein_coding	2124.56	-0.0885442	0.047983	-1.84532	0.0649905	0.785064
IRX2	ENSG00000170561.13	protein_coding	35.0055	2.62079	1.42035	1.84517	0.065013	0.785064
CXCL6	ENSG00000124875.10	protein_coding	67.0814	-0.87268	0.473348	-1.84363	0.0652367	0.78559
PLSCR1	ENSG00000188313.13	protein_coding	605.241	-0.23539	0.127678	-1.84363	0.0652372	0.78559
ACTL6A	ENSG00000136518.17	protein_coding	2086.1	-0.154168	0.0836307	-1.84344	0.0652647	0.78559
NPC2	ENSG00000119655.11	protein_coding	1620.4	0.1435	0.0778635	1.84297	0.0653334	0.78559
DDHD1	ENSG00000100523.17	protein_coding	1827.55	0.0882531	0.0478885	1.84289	0.0653454	0.78559
ZNF835	ENSG00000127903.14	protein_coding	4.69107	1.25158	0.679445	1.84206	0.065466	0.785881
TEX261	ENSG00000144043.13	protein_coding	5381.14	0.111677	0.0606387	1.84168	0.0655223	0.785881
CASP9	ENSG00000132906.18	protein_coding	474.167	0.181402	0.0985186	1.8413	0.0655779	0.785881
GRIK2	ENSG00000164418.22	protein_coding	144.28	0.983936	0.534524	1.84077	0.0656553	0.785881
LNPK	ENSG00000144320.14	protein_coding	11465.9	-0.244535	0.132846	-1.84075	0.0656587	0.785881
SLC2A4RG	ENSG00000125520.14	protein_coding	5053.17	-0.10788	0.058647	-1.83948	0.0658443	0.787129
PCOLCE2	ENSG00000163710.9	protein_coding	392.4	-0.688125	0.374136	-1.83924	0.0658803	0.787129
H4C9	ENSG00000276180.3	protein_coding	479.422	-0.582311	0.316671	-1.83885	0.0659366	0.787129
CNTNAP1	ENSG00000108797.12	protein_coding	7873.63	-0.26392	0.143633	-1.83747	0.0661412	0.788879
FAM229B	ENSG00000203778.8	protein_coding	431.958	0.222746	0.121296	1.83638	0.0663008	0.790089
RPL11	ENSG00000142676.14	protein_coding	7843.93	0.122474	0.0667479	1.83488	0.0665232	0.791669
POLR3GL	ENSG00000121851.13	protein_coding	398.577	0.15705	0.0856	1.8347	0.0665498	0.791669
NRARP	ENSG00000198435.4	protein_coding	16.6163	-0.597294	0.326008	-1.83214	0.0669302	0.793699
MACROD2	ENSG00000172264.19	protein_coding	33.3355	0.696778	0.38043	1.83156	0.0670177	0.793699
CGRRF1	ENSG00000100532.13	protein_coding	447.574	-0.167563	0.0914903	-1.83148	0.0670288	0.793699
SEPHS1	ENSG00000086475.15	protein_coding	3185.98	-0.162093	0.0885098	-1.83135	0.0670482	0.793699
ARRDC4	ENSG00000140450.9	protein_coding	2071.12	0.250568	0.136832	1.83121	0.0670693	0.793699
TBC1D9B	ENSG00000197226.13	protein_coding	10037.7	0.102933	0.0562193	1.83093	0.0671116	0.793699
CXCR5	ENSG00000160683.5	protein_coding	13.3538	0.891582	0.487037	1.83062	0.0671567	0.793699
CALHM6	ENSG00000188820.13	protein_coding	7.00272	1.30838	0.714799	1.83042	0.0671874	0.793699
DOCK7	ENSG00000116641.18	protein_coding	12506.6	0.175622	0.0959736	1.8299	0.0672649	0.793925
KCNJ12	ENSG00000184185.10	protein_coding	12.2136	0.717996	0.392695	1.82838	0.0674922	0.79522
ZNF79	ENSG00000196152.10	protein_coding	206.23	0.169385	0.0926547	1.82813	0.0675304	0.79522
KDM5B	ENSG00000117139.18	protein_coding	9081.36	0.177331	0.0970459	1.8273	0.0676554	0.79522
ALAS1	ENSG00000023330.15	protein_coding	2282.42	-0.0943394	0.0516306	-1.8272	0.06767	0.79522
YIPF6	ENSG00000181704.12	protein_coding	2506.76	0.0961642	0.052635	1.827	0.0676996	0.79522
BCORL1	ENSG00000085185.16	protein_coding	1815.97	0.224781	0.123058	1.82662	0.0677568	0.79522
QRSL1	ENSG00000130348.11	protein_coding	1055.46	-0.14639	0.0801756	-1.82587	0.0678694	0.79522
DLK2	ENSG00000171462.15	protein_coding	95.8875	0.49548	0.271378	1.8258	0.0678809	0.79522
HMBOX1	ENSG00000147421.18	protein_coding	1053.39	0.137381	0.0752791	1.82496	0.0680069	0.79522
PABPC1L	ENSG00000101104.13	protein_coding	192.823	0.287947	0.1578	1.82476	0.0680372	0.79522
MRPS27	ENSG00000113048.19	protein_coding	5310.33	-0.111208	0.0609571	-1.82437	0.0680959	0.79522
CHRNA5	ENSG00000169684.13	protein_coding	72.4612	-0.75461	0.413843	-1.82342	0.0682397	0.79522
DLST	ENSG00000119689.15	protein_coding	6484.74	-0.085479	0.0468863	-1.82311	0.0682864	0.79522
WDHD1	ENSG00000198554.12	protein_coding	1105.92	-0.352976	0.193669	-1.82257	0.0683684	0.79522
NOL7	ENSG00000225921.7	protein_coding	1744.91	-0.105508	0.0579062	-1.82205	0.0684477	0.79522
MFHAS1	ENSG00000147324.11	protein_coding	1475.77	-0.169833	0.0932265	-1.82173	0.0684964	0.79522
S100A1	ENSG00000160678.12	protein_coding	6.33068	0.94161	0.517061	1.82108	0.0685948	0.79522
SKA2	ENSG00000182628.13	protein_coding	3286.03	-0.173464	0.0952551	-1.82105	0.0685998	0.79522
GK5	ENSG00000175066.16	protein_coding	1832.46	0.141612	0.0777706	1.82089	0.0686237	0.79522
UBL5	ENSG00000198258.11	protein_coding	1465.12	0.142665	0.0783627	1.82057	0.0686721	0.79522
COPZ2	ENSG00000005243.10	protein_coding	3883.5	0.178016	0.0977941	1.82032	0.068711	0.79522
C17orf75	ENSG00000108666.11	protein_coding	614.418	-0.171084	0.0940041	-1.81996	0.068765	0.79522
THY1	ENSG00000154096.14	protein_coding	47398	0.187803	0.103191	1.81994	0.0687676	0.79522
EMC10	ENSG00000161671.17	protein_coding	6859.1	0.140288	0.0770868	1.81987	0.0687783	0.79522
TDRD9	ENSG00000156414.20	protein_coding	96.3996	-1.33169	0.731916	-1.81946	0.068842	0.79528
KIAA0586	ENSG00000100578.18	protein_coding	1861	-0.174444	0.0959332	-1.81839	0.0690047	0.795878
PLP2	ENSG00000102007.11	protein_coding	7413.51	0.154899	0.0851864	1.81835	0.0690108	0.795878
TTLL12	ENSG00000100304.13	protein_coding	3697.47	-0.17676	0.0972353	-1.81786	0.0690858	0.796067
GRB7	ENSG00000141738.14	protein_coding	14.8467	-0.847785	0.46679	-1.8162	0.0693392	0.797181
FST	ENSG00000134363.12	protein_coding	879.583	-0.412323	0.227068	-1.81586	0.0693924	0.797181
GOSR2	ENSG00000108433.17	protein_coding	3020.31	0.126669	0.0697603	1.81578	0.0694042	0.797181
AOPEP	ENSG00000148120.19	protein_coding	1549.46	0.1788	0.0985224	1.81482	0.0695518	0.797181
CYB561D1	ENSG00000174151.15	protein_coding	1185.57	-0.119803	0.0660175	-1.81472	0.0695677	0.797181
CEP97	ENSG00000182504.12	protein_coding	1945.21	-0.248286	0.136819	-1.8147	0.0695698	0.797181
APCDD1L	ENSG00000198768.11	protein_coding	3128.05	-0.833385	0.459279	-1.81455	0.0695929	0.797181
MICALL2	ENSG00000164877.19	protein_coding	1099.29	0.215791	0.118977	1.81372	0.0697203	0.797969
TMEM101	ENSG00000091947.10	protein_coding	793.882	-0.10348	0.0570676	-1.81328	0.0697884	0.798077
CAVIN1	ENSG00000177469.13	protein_coding	180128	0.133966	0.0739368	1.8119	0.070002	0.799602
PSMB7	ENSG00000136930.13	protein_coding	5145.78	-0.0855886	0.0472433	-1.81166	0.0700394	0.799602
RAB11B	ENSG00000185236.12	protein_coding	4234.02	0.0653109	0.0360623	1.81106	0.070132	0.799987
RFESD	ENSG00000175449.15	protein_coding	55.8468	-0.333095	0.184122	-1.8091	0.070435	0.801885
ADPRS	ENSG00000116863.11	protein_coding	1363.79	0.10257	0.0567032	1.80888	0.0704689	0.801885
CCDC122	ENSG00000151773.13	protein_coding	308.094	-0.391277	0.216526	-1.80707	0.0707515	0.801885
DOK4	ENSG00000125170.11	protein_coding	1720.04	0.194183	0.107463	1.80698	0.0707647	0.801885
C11orf24	ENSG00000171067.11	protein_coding	5317.61	0.118669	0.0657184	1.80571	0.0709631	0.801885
ACOT8	ENSG00000101473.17	protein_coding	599.763	0.110907	0.0614566	1.80464	0.0711304	0.801885
TBC1D9	ENSG00000109436.8	protein_coding	3101.51	-0.114132	0.0632548	-1.80433	0.0711799	0.801885
NXT2	ENSG00000101888.12	protein_coding	607.961	-0.115173	0.0638422	-1.80403	0.0712265	0.801885
LRP1B	ENSG00000168702.18	protein_coding	43.3565	1.08464	0.60136	1.80365	0.071286	0.801885
FOXP3	ENSG00000049768.18	protein_coding	8.22571	0.876137	0.48587	1.80323	0.0713516	0.801885
ALKBH8	ENSG00000137760.15	protein_coding	541.521	-0.129425	0.0717842	-1.80298	0.0713914	0.801885
ZBTB26	ENSG00000171448.9	protein_coding	422.868	-0.168036	0.0931992	-1.80297	0.0713926	0.801885
ARVCF	ENSG00000099889.14	protein_coding	224.161	0.456491	0.253309	1.80211	0.0715276	0.801885
CCDC71L	ENSG00000253276.5	protein_coding	6477.46	-0.221064	0.122684	-1.8019	0.0715606	0.801885
CHST6	ENSG00000183196.10	protein_coding	45.6235	-0.646538	0.358811	-1.80189	0.0715627	0.801885
PRIMPOL	ENSG00000164306.11	protein_coding	497.429	-0.20743	0.115182	-1.80089	0.0717202	0.801885
UBE2E1	ENSG00000170142.12	protein_coding	3495.02	-0.10726	0.05956	-1.80088	0.0717225	0.801885
SEPTIN6	ENSG00000125354.24	protein_coding	1085.68	0.254575	0.141393	1.80048	0.0717844	0.801885
SPARC	ENSG00000113140.11	protein_coding	360838	0.199584	0.110858	1.80036	0.0718045	0.801885
PTPN9	ENSG00000169410.11	protein_coding	3542.28	-0.0633046	0.0351636	-1.80029	0.0718151	0.801885
GNA12	ENSG00000146535.15	protein_coding	6945.55	0.0978125	0.0543342	1.8002	0.0718289	0.801885
DPCD	ENSG00000166171.13	protein_coding	514.065	0.143647	0.0797954	1.80019	0.0718312	0.801885
MARK4	ENSG00000007047.16	protein_coding	3198.47	0.105961	0.0588633	1.80012	0.0718415	0.801885
DGKQ	ENSG00000145214.14	protein_coding	1218.01	0.124178	0.0689996	1.7997	0.0719088	0.801885
MSANTD2	ENSG00000120458.13	protein_coding	357.083	-0.180641	0.100377	-1.79964	0.0719182	0.801885
GNPTAB	ENSG00000111670.16	protein_coding	6471.51	0.199437	0.110823	1.79959	0.071925	0.801885
HAS3	ENSG00000103044.11	protein_coding	69.4816	0.695031	0.386225	1.79955	0.0719317	0.801885
FBXO43	ENSG00000156509.14	protein_coding	58.8473	-0.52875	0.293842	-1.79944	0.0719497	0.801885
MFAP5	ENSG00000197614.11	protein_coding	222.666	1.33481	0.742112	1.79866	0.072072	0.802591
H2AC20	ENSG00000184260.6	protein_coding	3236.74	-0.241196	0.134157	-1.79787	0.0721976	0.803331
HMMR	ENSG00000072571.20	protein_coding	1583.06	-0.44916	0.249921	-1.79721	0.0723028	0.803348
H1-3	ENSG00000124575.7	protein_coding	2829.7	-0.381597	0.212338	-1.79712	0.0723172	0.803348
NELFCD	ENSG00000101158.15	protein_coding	2903.71	-0.0986602	0.0549278	-1.79618	0.0724657	0.804076
P4HTM	ENSG00000178467.18	protein_coding	809.706	0.152504	0.0849148	1.79596	0.0725011	0.804076
RAB3A	ENSG00000105649.10	protein_coding	60.4039	0.392166	0.218493	1.79487	0.0726746	0.80461
PGBD1	ENSG00000137338.6	protein_coding	346.983	-0.148975	0.0830073	-1.79472	0.0726985	0.80461
DEPDC1	ENSG00000024526.17	protein_coding	3604.62	-0.411934	0.229548	-1.79454	0.0727267	0.80461
TLE1	ENSG00000196781.16	protein_coding	1247.98	-0.246002	0.137199	-1.79304	0.0729667	0.805955
WDFY2	ENSG00000139668.9	protein_coding	2027.63	-0.272439	0.151982	-1.79257	0.0730413	0.805955
MMD	ENSG00000108960.9	protein_coding	360.858	-0.397647	0.221852	-1.7924	0.073069	0.805955
TANGO2	ENSG00000183597.16	protein_coding	1420.99	0.109372	0.0610234	1.7923	0.0730854	0.805955
TIMM8B	ENSG00000150779.12	protein_coding	1021.66	0.154452	0.0862008	1.79177	0.0731706	0.806241
DOK3	ENSG00000146094.16	protein_coding	60.8078	0.460553	0.25711	1.79127	0.0732504	0.806332
GOLGA8A	ENSG00000175265.19	protein_coding	127.342	0.65812	0.367548	1.79057	0.0733621	0.806332
TUBB2A	ENSG00000137267.7	protein_coding	2650.09	0.240533	0.134373	1.79004	0.0734473	0.806332
CHD9	ENSG00000177200.18	protein_coding	5325.39	0.105891	0.0591606	1.78989	0.0734717	0.806332
CHST12	ENSG00000136213.10	protein_coding	1384.32	0.143469	0.0801564	1.78987	0.0734754	0.806332
ZNF875	ENSG00000181666.19	protein_coding	643.849	0.121774	0.0680645	1.7891	0.0735985	0.807031
DSG2	ENSG00000046604.15	protein_coding	181.387	-1.36002	0.760983	-1.78719	0.0739068	0.809759
ST6GAL1	ENSG00000073849.16	protein_coding	137.124	0.621487	0.347823	1.78679	0.0739711	0.809811
MAGI1	ENSG00000151276.24	protein_coding	2159.45	0.204185	0.114362	1.78543	0.0741914	0.810093
TTLL3	ENSG00000214021.19	protein_coding	137.564	0.319708	0.179101	1.78507	0.07425	0.810093
EXD3	ENSG00000187609.16	protein_coding	256.646	0.166245	0.0931383	1.78492	0.0742738	0.810093
KLHL2	ENSG00000109466.14	protein_coding	568.757	-0.141944	0.0795719	-1.78384	0.0744497	0.810093
CPM	ENSG00000135678.12	protein_coding	351.469	-0.365388	0.204837	-1.7838	0.074456	0.810093
EFR3A	ENSG00000132294.15	protein_coding	7810.89	-0.103767	0.0581896	-1.78326	0.0745443	0.810093
PTPRG	ENSG00000144724.20	protein_coding	6450.54	-0.157003	0.0880564	-1.78299	0.0745886	0.810093
LIPE	ENSG00000079435.11	protein_coding	216.866	-0.346577	0.194431	-1.78252	0.0746646	0.810093
ZNF880	ENSG00000221923.9	protein_coding	687.343	-0.277476	0.155672	-1.78245	0.0746766	0.810093
HES5	ENSG00000197921.6	protein_coding	3.28685	-1.50191	0.842771	-1.78211	0.0747316	0.810093
SOCS5	ENSG00000171150.9	protein_coding	11496.5	-0.123147	0.0691051	-1.78202	0.0747454	0.810093
NUP210	ENSG00000132182.13	protein_coding	27.7952	1.10617	0.620778	1.7819	0.0747652	0.810093
PLAC8	ENSG00000145287.12	protein_coding	92.3017	-0.633929	0.355767	-1.78186	0.0747714	0.810093
CARM1	ENSG00000142453.13	protein_coding	7433.69	0.0858197	0.0481735	1.78147	0.0748357	0.810144
ADAM15	ENSG00000143537.14	protein_coding	4956.42	0.135485	0.0760829	1.78075	0.0749532	0.810771
ZNF737	ENSG00000237440.9	protein_coding	276.235	0.185548	0.104225	1.78025	0.0750346	0.811006
ZDHHC15	ENSG00000102383.14	protein_coding	54.9482	-1.25197	0.704019	-1.77832	0.0753519	0.812984
ENDOD1	ENSG00000149218.5	protein_coding	4130.9	-0.21257	0.119548	-1.77812	0.0753846	0.812984
SBSN	ENSG00000189001.11	protein_coding	20.9525	-0.813444	0.457576	-1.77773	0.0754489	0.812984
XPA	ENSG00000136936.11	protein_coding	206.483	0.144494	0.081297	1.77736	0.0755088	0.812984
EXOC6B	ENSG00000144036.16	protein_coding	4018.31	0.119046	0.0669888	1.7771	0.0755518	0.812984
VRK3	ENSG00000105053.11	protein_coding	938.642	-0.141437	0.0795951	-1.77695	0.0755764	0.812984
NABP1	ENSG00000173559.15	protein_coding	3287.49	0.175844	0.0990002	1.7762	0.0756998	0.81328
EIF2S3B	ENSG00000180574.4	protein_coding	65.4297	-0.780108	0.439236	-1.77606	0.0757235	0.81328
CDKN2D	ENSG00000129355.7	protein_coding	218.565	-0.308792	0.173997	-1.77469	0.0759486	0.813394
MAP3K5	ENSG00000197442.11	protein_coding	1514.87	-0.162826	0.0917757	-1.77417	0.0760347	0.813394
RAP2C	ENSG00000123728.10	protein_coding	3069.56	-0.118131	0.0666098	-1.77348	0.07615	0.813394
NDUFB8	ENSG00000166136.17	protein_coding	332.366	0.197576	0.111411	1.7734	0.0761622	0.813394
ITGA10	ENSG00000143127.13	protein_coding	81.7882	-0.60935	0.343742	-1.77269	0.0762794	0.813394
PRRG2	ENSG00000126460.11	protein_coding	10.9705	0.811857	0.458	1.77261	0.0762929	0.813394
KLF3	ENSG00000109787.13	protein_coding	3555.74	-0.124039	0.0699847	-1.77237	0.0763335	0.813394
TGFBR2	ENSG00000163513.20	protein_coding	8596.59	-0.286916	0.161923	-1.77193	0.0764069	0.813394
PCDHB5	ENSG00000113209.9	protein_coding	32.6437	-0.737233	0.416194	-1.77137	0.0764993	0.813394
RPAP3	ENSG00000005175.10	protein_coding	1469.87	-0.112688	0.0636312	-1.77096	0.076567	0.813394
ANKS3	ENSG00000168096.15	protein_coding	627.772	0.110008	0.0621205	1.77088	0.0765806	0.813394
TM4SF20	ENSG00000168955.4	protein_coding	1020.81	1.00394	0.56694	1.7708	0.0765936	0.813394
MPV17L	ENSG00000156968.9	protein_coding	64.6345	-0.439891	0.248428	-1.7707	0.0766111	0.813394
SYP	ENSG00000102003.12	protein_coding	23.7793	-0.42451	0.239901	-1.76952	0.0768066	0.813394
SLC35A5	ENSG00000138459.9	protein_coding	2069.91	-0.124924	0.0706077	-1.76927	0.076849	0.813394
IRF1	ENSG00000125347.15	protein_coding	1668.86	-0.194078	0.109708	-1.76903	0.0768884	0.813394
SNTA1	ENSG00000101400.6	protein_coding	762.803	-0.19507	0.110302	-1.7685	0.0769769	0.813394
SELENOP	ENSG00000250722.6	protein_coding	83.9901	1.66808	0.943714	1.76757	0.0771327	0.813394
STRBP	ENSG00000165209.19	protein_coding	230.607	-0.312633	0.176878	-1.7675	0.0771443	0.813394
TMEM187	ENSG00000177854.8	protein_coding	297.65	-0.237671	0.134494	-1.76714	0.0772041	0.813394
PDCD4	ENSG00000150593.18	protein_coding	2720.17	0.208524	0.118002	1.76712	0.0772082	0.813394
TRIM65	ENSG00000141569.12	protein_coding	1242.85	-0.13461	0.0761937	-1.76668	0.0772821	0.813394
SLC25A29	ENSG00000197119.13	protein_coding	451.649	0.197506	0.111803	1.76656	0.0773023	0.813394
ZNF625	ENSG00000257591.6	protein_coding	148.242	0.201772	0.114266	1.7658	0.0774288	0.813394
TXNL4B	ENSG00000140830.10	protein_coding	375.16	-0.115048	0.0651551	-1.76575	0.0774378	0.813394
ACVR2B	ENSG00000114739.14	protein_coding	347.36	-0.162224	0.0918976	-1.76527	0.0775178	0.813394
FAM131A	ENSG00000175182.15	protein_coding	492.527	0.180626	0.102342	1.76493	0.077576	0.813394
TFAM	ENSG00000108064.11	protein_coding	1821.53	-0.142119	0.0805573	-1.7642	0.0776987	0.813394
ANKRD6	ENSG00000135299.18	protein_coding	164.457	0.913338	0.517918	1.76348	0.0778192	0.813394
SGO2	ENSG00000163535.18	protein_coding	1784.17	-0.381347	0.216312	-1.76295	0.0779094	0.813394
PIGC	ENSG00000135845.10	protein_coding	786.002	-0.160186	0.0908674	-1.76285	0.0779252	0.813394
NFE2	ENSG00000123405.14	protein_coding	123.67	0.392527	0.222708	1.76252	0.0779823	0.813394
NUP153	ENSG00000124789.12	protein_coding	6494.05	-0.121111	0.0687195	-1.7624	0.0780012	0.813394
P3H2	ENSG00000090530.10	protein_coding	1216.57	-0.477182	0.270757	-1.7624	0.0780019	0.813394
EFTUD2	ENSG00000108883.13	protein_coding	6808.63	-0.137525	0.0780464	-1.76209	0.0780546	0.813394
SUZ12	ENSG00000178691.12	protein_coding	3574.05	-0.135037	0.0766644	-1.7614	0.07817	0.813394
THAP10	ENSG00000129028.9	protein_coding	226.924	-0.284061	0.161348	-1.76055	0.0783151	0.813394
GRIA1	ENSG00000155511.19	protein_coding	4.17103	1.56649	0.889803	1.76049	0.0783253	0.813394
ZSWIM3	ENSG00000132801.7	protein_coding	177.137	0.205084	0.116504	1.76031	0.0783558	0.813394
FIS1	ENSG00000214253.9	protein_coding	3439.51	0.0867646	0.0493171	1.75932	0.0785229	0.813394
TIGD2	ENSG00000180346.5	protein_coding	797.957	-0.222575	0.126515	-1.75928	0.0785293	0.813394
GPSM2	ENSG00000121957.15	protein_coding	1999.08	-0.328658	0.18682	-1.75922	0.0785405	0.813394
TJAP1	ENSG00000137221.14	protein_coding	1955.67	-0.080607	0.0458338	-1.75868	0.0786319	0.813394
MT-CO3	ENSG00000198938.2	protein_coding	40981	0.148903	0.0846701	1.75862	0.0786416	0.813394
GNPAT	ENSG00000116906.13	protein_coding	2445.72	-0.0936548	0.0532566	-1.75856	0.0786525	0.813394
UGCG	ENSG00000148154.10	protein_coding	9182.18	-0.19948	0.113436	-1.75853	0.0786573	0.813394
TTK	ENSG00000112742.10	protein_coding	2100.27	-0.395559	0.224981	-1.75819	0.0787158	0.813394
NAP1L5	ENSG00000177432.8	protein_coding	483.501	0.242281	0.137808	1.75811	0.0787296	0.813394
VKORC1	ENSG00000167397.15	protein_coding	1386.85	0.169674	0.0965099	1.7581	0.0787303	0.813394
USP16	ENSG00000156256.15	protein_coding	2296.98	-0.161411	0.0918137	-1.75803	0.078742	0.813394
ZNF844	ENSG00000223547.10	protein_coding	249.026	0.237028	0.134845	1.75778	0.078785	0.813394
SRPK1	ENSG00000096063.16	protein_coding	4877.62	-0.151067	0.0859867	-1.75686	0.0789411	0.813606
NFKBIE	ENSG00000146232.17	protein_coding	780.797	-0.215883	0.122893	-1.75667	0.0789733	0.813606
MRPL45	ENSG00000278845.5	protein_coding	1975.63	-0.0949413	0.0540534	-1.75643	0.0790142	0.813606
FMNL1	ENSG00000184922.15	protein_coding	407.734	-0.60557	0.344826	-1.75616	0.0790607	0.813606
TMEM161B	ENSG00000164180.14	protein_coding	440.959	-0.143016	0.0814759	-1.75531	0.079206	0.813606
CDC5L	ENSG00000096401.8	protein_coding	2479.76	-0.115597	0.0658677	-1.75499	0.0792619	0.813606
TEX10	ENSG00000136891.14	protein_coding	2196.59	-0.166338	0.0947853	-1.7549	0.0792769	0.813606
LGALS9	ENSG00000168961.17	protein_coding	107.669	-0.890869	0.50766	-1.75485	0.0792843	0.813606
PIGB	ENSG00000069943.10	protein_coding	501.545	0.133778	0.0763206	1.75284	0.0796295	0.816255
ZFR	ENSG00000056097.16	protein_coding	9251.22	-0.0546682	0.0311955	-1.75244	0.0796982	0.816255
HOMER2	ENSG00000103942.13	protein_coding	240.175	-0.642848	0.36686	-1.7523	0.0797224	0.816255
DCAF17	ENSG00000115827.14	protein_coding	1627.25	0.116241	0.0663579	1.75172	0.0798214	0.816652
TGFB2	ENSG00000092969.12	protein_coding	11583.5	0.452812	0.258596	1.75104	0.0799383	0.817234
ZNF285	ENSG00000267508.6	protein_coding	80.7877	0.290208	0.165864	1.74968	0.0801733	0.818205
MACROD1	ENSG00000133315.12	protein_coding	435.948	-0.18331	0.104796	-1.7492	0.0802562	0.818205
MMP19	ENSG00000123342.16	protein_coding	924.135	0.178033	0.101789	1.74904	0.0802837	0.818205
SFR1	ENSG00000156384.15	protein_coding	298.853	-0.260912	0.149216	-1.74855	0.0803681	0.818205
PCYT1B	ENSG00000102230.14	protein_coding	11.3919	-1.51489	0.866453	-1.74838	0.0803975	0.818205
H1-1	ENSG00000124610.5	protein_coding	366.276	-0.477957	0.273446	-1.7479	0.0804814	0.818205
GPR153	ENSG00000158292.7	protein_coding	513.115	0.286706	0.164048	1.7477	0.0805164	0.818205
ARHGAP28	ENSG00000088756.13	protein_coding	57.1169	1.06806	0.611292	1.74721	0.080601	0.818205
ARFIP1	ENSG00000164144.16	protein_coding	2530.67	-0.0817165	0.0467804	-1.74681	0.08067	0.818205
PIK3R3	ENSG00000117461.15	protein_coding	1240.03	0.269928	0.154627	1.74567	0.0808686	0.818205
ZNF474	ENSG00000164185.7	protein_coding	6.46862	0.928008	0.531657	1.7455	0.0808979	0.818205
SLC25A45	ENSG00000162241.13	protein_coding	301.882	0.258474	0.148081	1.74549	0.0808991	0.818205
DPY30	ENSG00000162961.14	protein_coding	878.524	-0.119621	0.0685371	-1.74534	0.0809257	0.818205
SLC17A5	ENSG00000119899.13	protein_coding	1850.15	0.170294	0.0975948	1.74491	0.0810003	0.818205
RNF34	ENSG00000170633.17	protein_coding	2388.19	-0.0825202	0.0472935	-1.74485	0.0810103	0.818205
PDLIM3	ENSG00000154553.17	protein_coding	96.7841	-0.672816	0.385619	-1.74477	0.081025	0.818205
CLDN12	ENSG00000157224.16	protein_coding	1687.89	-0.21359	0.122452	-1.74428	0.081111	0.818205
SYT16	ENSG00000139973.18	protein_coding	219.164	0.666524	0.382128	1.74424	0.0811164	0.818205
ACTC1	ENSG00000159251.10	protein_coding	83.3365	0.847409	0.486211	1.74288	0.0813539	0.819925
ADAMTS3	ENSG00000156140.11	protein_coding	251.849	0.548923	0.315687	1.73882	0.0820663	0.819925
CACNA2D3	ENSG00000157445.16	protein_coding	170.653	0.67647	0.38912	1.73846	0.0821297	0.819925
PRKAA1	ENSG00000132356.12	protein_coding	5315.37	-0.0831971	0.0478629	-1.73824	0.0821686	0.819925
ITPKC	ENSG00000086544.4	protein_coding	934.474	0.131568	0.0757016	1.73798	0.0822142	0.819925
EYA4	ENSG00000112319.21	protein_coding	383.531	1.01631	0.584861	1.7377	0.0822635	0.819925
GOLGA7	ENSG00000147533.19	protein_coding	3276.31	-0.0892327	0.0513535	-1.73762	0.0822785	0.819925
AUH	ENSG00000148090.12	protein_coding	295.951	-0.15369	0.0884965	-1.73668	0.0824433	0.819925
LY6G5B	ENSG00000240053.9	protein_coding	40.2578	0.4395	0.253076	1.73663	0.0824522	0.819925
NUP133	ENSG00000069248.12	protein_coding	3509.02	-0.0755859	0.0435266	-1.73655	0.0824674	0.819925
FBXW8	ENSG00000174989.14	protein_coding	2939.8	0.216598	0.124735	1.73646	0.0824823	0.819925
KDM4C	ENSG00000107077.21	protein_coding	1106.53	0.0968825	0.0558119	1.73588	0.0825859	0.819925
CDC20	ENSG00000117399.14	protein_coding	6085.68	-0.33545	0.193266	-1.73569	0.0826186	0.819925
RNF181	ENSG00000168894.10	protein_coding	1566.71	0.0898284	0.0517588	1.73552	0.0826488	0.819925
SOD1	ENSG00000142168.15	protein_coding	6007.3	0.101721	0.0586123	1.73548	0.0826554	0.819925
TSHZ3	ENSG00000121297.8	protein_coding	1302.3	-0.140994	0.0812432	-1.73545	0.0826607	0.819925
RBM10	ENSG00000182872.16	protein_coding	3556.27	-0.0586828	0.0338229	-1.735	0.0827402	0.819925
MYL9	ENSG00000101335.10	protein_coding	37305.4	0.213689	0.123176	1.73483	0.0827712	0.819925
KCNE3	ENSG00000175538.11	protein_coding	18.7587	-0.682376	0.393381	-1.73465	0.0828037	0.819925
ABAT	ENSG00000183044.12	protein_coding	295.627	0.523902	0.302129	1.73404	0.0829114	0.819925
GORASP2	ENSG00000115806.13	protein_coding	8997.95	0.0680261	0.039235	1.73381	0.0829516	0.819925
ACBD3	ENSG00000182827.9	protein_coding	6096.45	0.107793	0.0621766	1.73366	0.0829785	0.819925
GPN2	ENSG00000142751.15	protein_coding	1325.76	0.084856	0.0489617	1.73311	0.0830762	0.819925
ARL6IP6	ENSG00000177917.12	protein_coding	831.993	-0.181751	0.104879	-1.73296	0.0831035	0.819925
CDC23	ENSG00000094880.11	protein_coding	2429.43	-0.0781989	0.0451272	-1.73286	0.0831214	0.819925
CEBPZ	ENSG00000115816.15	protein_coding	2055.82	-0.145944	0.0842301	-1.73268	0.0831518	0.819925
COQ5	ENSG00000110871.15	protein_coding	974.627	-0.159595	0.0921307	-1.73227	0.0832261	0.819925
NSL1	ENSG00000117697.15	protein_coding	1376.77	-0.144006	0.0831779	-1.7313	0.0833984	0.819925
BLOC1S1	ENSG00000135441.8	protein_coding	427.668	0.137278	0.0793157	1.73078	0.0834902	0.819925
PLK1	ENSG00000166851.15	protein_coding	5374.95	-0.381819	0.220725	-1.72984	0.0836586	0.819925
FBF1	ENSG00000188878.20	protein_coding	519.029	0.167323	0.0967559	1.72933	0.08375	0.819925
GRAMD2B	ENSG00000155324.10	protein_coding	16649.2	0.218622	0.12642	1.72933	0.0837508	0.819925
BROX	ENSG00000162819.12	protein_coding	7434.03	-0.0865291	0.0500372	-1.7293	0.083756	0.819925
TNS1	ENSG00000079308.21	protein_coding	26760.5	0.335358	0.193947	1.72912	0.0837878	0.819925
NIF3L1	ENSG00000196290.17	protein_coding	744.801	-0.240654	0.139179	-1.72909	0.0837922	0.819925
NCBP1	ENSG00000136937.13	protein_coding	5041.54	-0.0705885	0.0408328	-1.72872	0.0838593	0.819925
CSAD	ENSG00000139631.20	protein_coding	308.808	0.215479	0.124706	1.7279	0.0840067	0.819925
AKAP8L	ENSG00000011243.19	protein_coding	1273.66	0.0966133	0.0559285	1.72744	0.0840882	0.819925
SERTAD4	ENSG00000082497.12	protein_coding	1936.22	0.363742	0.210591	1.72724	0.0841237	0.819925
WNT16	ENSG00000002745.13	protein_coding	48.8811	-0.928591	0.537651	-1.72712	0.0841454	0.819925
KCTD14	ENSG00000151364.17	protein_coding	202.821	-0.318134	0.184215	-1.72697	0.0841734	0.819925
GSTP1	ENSG00000084207.18	protein_coding	9837.92	0.0891688	0.0516378	1.72681	0.0842016	0.819925
UVSSA	ENSG00000163945.19	protein_coding	1851.76	-0.439313	0.254469	-1.72639	0.0842778	0.819925
ERCC8	ENSG00000049167.16	protein_coding	955.282	-0.0974257	0.0564435	-1.72608	0.0843335	0.819925
CYB5R4	ENSG00000065615.14	protein_coding	787.892	-0.118747	0.0688031	-1.72589	0.0843673	0.819925
DSTYK	ENSG00000133059.18	protein_coding	3334.7	0.116399	0.0674551	1.72558	0.0844236	0.819925
HTRA1	ENSG00000166033.13	protein_coding	9624.21	0.22015	0.127785	1.72282	0.084921	0.819925
TCEAL4	ENSG00000133142.19	protein_coding	1759.78	0.188517	0.109447	1.72245	0.0849883	0.819925
MAMDC2	ENSG00000165072.10	protein_coding	806.544	1.0837	0.629244	1.72222	0.0850295	0.819925
PWWP2A	ENSG00000170234.13	protein_coding	1179.83	-0.0822991	0.0477893	-1.72213	0.0850469	0.819925
AKAP6	ENSG00000151320.11	protein_coding	24.474	0.628802	0.36515	1.72204	0.0850628	0.819925
RAMP1	ENSG00000132329.11	protein_coding	191.814	0.588479	0.341747	1.72197	0.0850746	0.819925
NHEJ1	ENSG00000187736.14	protein_coding	785.2	-0.109354	0.0635194	-1.72159	0.0851438	0.819925
APPL1	ENSG00000157500.12	protein_coding	4643.45	-0.112523	0.0653696	-1.72134	0.0851898	0.819925
ZNF677	ENSG00000197928.11	protein_coding	336.54	-0.13502	0.0784429	-1.72126	0.0852045	0.819925
NAMPT	ENSG00000105835.13	protein_coding	4365.57	-0.175873	0.102225	-1.72045	0.08535	0.819925
MFAP1	ENSG00000140259.7	protein_coding	1100.02	0.092053	0.0535109	1.72027	0.085384	0.819925
RPP38	ENSG00000152464.15	protein_coding	469.193	-0.0972242	0.0565319	-1.71981	0.0854669	0.819925
PKP3	ENSG00000184363.10	protein_coding	149.911	0.249388	0.145029	1.71957	0.0855099	0.819925
PC	ENSG00000173599.15	protein_coding	979.868	-0.226804	0.131965	-1.71867	0.0856746	0.819925
NR3C2	ENSG00000151623.15	protein_coding	163.788	0.745015	0.433602	1.7182	0.0857599	0.819925
SLC1A3	ENSG00000079215.15	protein_coding	3.37806	-1.54733	0.90077	-1.71778	0.0858365	0.819925
HMGXB4	ENSG00000100281.14	protein_coding	2097.83	-0.123757	0.0720515	-1.71762	0.0858661	0.819925
CTIF	ENSG00000134030.14	protein_coding	7667.01	0.193729	0.112814	1.71725	0.085934	0.819925
CNTNAP3	ENSG00000106714.18	protein_coding	7.21012	1.46891	0.855632	1.71675	0.0860251	0.819925
PLGRKT	ENSG00000107020.10	protein_coding	856.18	-0.187474	0.109217	-1.71654	0.0860635	0.819925
SPRN	ENSG00000203772.8	protein_coding	80.2168	0.460346	0.268304	1.71576	0.0862054	0.819925
CEP68	ENSG00000011523.15	protein_coding	1373.01	-0.171345	0.0998876	-1.71538	0.0862755	0.819925
ITGBL1	ENSG00000198542.15	protein_coding	14626.9	0.426777	0.248804	1.71532	0.0862871	0.819925
SFT2D1	ENSG00000198818.10	protein_coding	1075.04	-0.101066	0.05892	-1.7153	0.0862902	0.819925
RNF2	ENSG00000121481.12	protein_coding	1710.14	-0.1121	0.0653784	-1.71463	0.0864135	0.819925
ASB3	ENSG00000115239.24	protein_coding	740.884	-0.106955	0.0623907	-1.71428	0.0864773	0.819925
GART	ENSG00000159131.17	protein_coding	5963.88	-0.0786287	0.04587	-1.71416	0.0864985	0.819925
NOG	ENSG00000183691.6	protein_coding	428.187	0.446243	0.260342	1.71407	0.0865161	0.819925
PDRG1	ENSG00000088356.6	protein_coding	651.603	0.12352	0.0720735	1.7138	0.0865648	0.819925
H3C7	ENSG00000277775.2	protein_coding	2593.91	-0.398056	0.232271	-1.71376	0.0865726	0.819925
IPO7	ENSG00000205339.10	protein_coding	22823.1	-0.0856941	0.0500133	-1.71343	0.086634	0.819925
TCEAL7	ENSG00000182916.8	protein_coding	246.259	-0.572892	0.33446	-1.71289	0.0867332	0.819925
CERS5	ENSG00000139624.14	protein_coding	2305.07	0.0915029	0.0534209	1.71287	0.0867369	0.819925
GOLGB1	ENSG00000173230.17	protein_coding	5353.8	0.224716	0.1312	1.71277	0.0867541	0.819925
F2R	ENSG00000181104.7	protein_coding	5164.95	-0.255076	0.148983	-1.71212	0.086875	0.819925
RAMAC	ENSG00000169612.4	protein_coding	551.063	-0.150661	0.0880169	-1.71173	0.0869466	0.819925
CXCL1	ENSG00000163739.5	protein_coding	395.519	-0.665466	0.388799	-1.71159	0.0869714	0.819925
PHGDH	ENSG00000092621.13	protein_coding	8896.05	-0.332105	0.194034	-1.71158	0.0869744	0.819925
MTRF1L	ENSG00000112031.16	protein_coding	947.577	-0.169038	0.0987755	-1.71133	0.0870196	0.819925
OBI1	ENSG00000152193.8	protein_coding	1055.27	-0.149624	0.0874472	-1.71102	0.0870783	0.819925
GCH1	ENSG00000131979.20	protein_coding	222.414	-0.600079	0.350723	-1.71098	0.0870852	0.819925
DISP2	ENSG00000140323.6	protein_coding	130.794	-0.898163	0.525006	-1.71077	0.0871242	0.819925
CCDC61	ENSG00000104983.8	protein_coding	378.524	-0.133274	0.077949	-1.70976	0.0873103	0.819925
MAFF	ENSG00000185022.12	protein_coding	2111.38	-0.223638	0.130815	-1.70958	0.087343	0.819925
BUD13	ENSG00000137656.12	protein_coding	640.917	-0.175495	0.102654	-1.70958	0.0873432	0.819925
ATP11C	ENSG00000101974.15	protein_coding	3173.24	-0.136049	0.079595	-1.70927	0.0874018	0.819925
PLK4	ENSG00000142731.11	protein_coding	944.943	-0.353772	0.207044	-1.70868	0.0875107	0.819925
CST3	ENSG00000101439.9	protein_coding	7677.12	0.0978605	0.0572731	1.70867	0.0875129	0.819925
COL17A1	ENSG00000065618.21	protein_coding	33.5817	-0.764557	0.447597	-1.70814	0.0876111	0.819925
MCRIP2	ENSG00000172366.20	protein_coding	396.637	0.18283	0.107123	1.70673	0.0878714	0.819925
RBM18	ENSG00000119446.14	protein_coding	1818.03	-0.131901	0.0772846	-1.70669	0.0878796	0.819925
LTV1	ENSG00000135521.9	protein_coding	455.917	-0.118821	0.0696246	-1.70659	0.0878975	0.819925
SSC5D	ENSG00000179954.16	protein_coding	3389.04	1.00371	0.588203	1.7064	0.0879341	0.819925
SP4	ENSG00000105866.15	protein_coding	549.268	-0.206785	0.121184	-1.70638	0.0879382	0.819925
WASHC4	ENSG00000136051.15	protein_coding	6780.82	-0.0682239	0.0399901	-1.70602	0.0880046	0.819925
ATG16L2	ENSG00000168010.11	protein_coding	181.715	-0.290486	0.170321	-1.70552	0.0880973	0.819925
PITHD1	ENSG00000057757.10	protein_coding	2128.06	0.13957	0.0818418	1.70536	0.0881277	0.819925
KCNS1	ENSG00000124134.9	protein_coding	95.8532	-0.445939	0.261497	-1.70533	0.0881322	0.819925
HMCN1	ENSG00000143341.12	protein_coding	652.937	0.466608	0.27365	1.70513	0.0881706	0.819925
TFE3	ENSG00000068323.17	protein_coding	8418.98	0.0792611	0.0464945	1.70474	0.0882424	0.819925
RAD21	ENSG00000164754.16	protein_coding	11599.3	-0.183482	0.107705	-1.70356	0.0884631	0.819925
STK24	ENSG00000102572.15	protein_coding	7319.28	-0.0906743	0.0532283	-1.7035	0.088475	0.819925
PPP1R16A	ENSG00000160972.10	protein_coding	1190.85	0.142415	0.083606	1.70341	0.088491	0.819925
FADS2	ENSG00000134824.14	protein_coding	15894.5	-0.325527	0.191107	-1.70338	0.0884975	0.819925
CCNC	ENSG00000112237.13	protein_coding	3400.09	-0.100124	0.0587947	-1.70294	0.0885801	0.819925
SLC26A4	ENSG00000091137.14	protein_coding	12.4493	-0.618066	0.36299	-1.70271	0.0886225	0.819925
HDHD3	ENSG00000119431.10	protein_coding	278.113	0.269669	0.15839	1.70256	0.08865	0.819925
STK38L	ENSG00000211455.8	protein_coding	1139.31	0.201884	0.118588	1.7024	0.0886807	0.819925
NBPF15	ENSG00000266338.7	protein_coding	1153.46	-0.100789	0.059233	-1.70157	0.0888355	0.819925
CXCL16	ENSG00000161921.17	protein_coding	230.121	0.593203	0.348766	1.70086	0.0889692	0.819925
AFF1	ENSG00000172493.23	protein_coding	7767.37	0.14519	0.0853784	1.70054	0.0890285	0.819925
ZNF346	ENSG00000113761.12	protein_coding	812.319	0.115376	0.0678618	1.70016	0.0891007	0.819925
AFG2A	ENSG00000145375.9	protein_coding	1643.98	-0.303935	0.178769	-1.70015	0.0891023	0.819925
TEX9	ENSG00000151575.15	protein_coding	94.3859	-0.318932	0.187659	-1.69952	0.0892204	0.819925
EPHX3	ENSG00000105131.8	protein_coding	4.59792	1.16356	0.684764	1.69922	0.0892778	0.819925
ANKLE1	ENSG00000160117.16	protein_coding	13.9992	-0.611807	0.360149	-1.69876	0.0893638	0.819925
THAP11	ENSG00000168286.3	protein_coding	1042.05	-0.112688	0.0663462	-1.69849	0.089415	0.819925
APLP1	ENSG00000105290.14	protein_coding	550.522	0.324291	0.190942	1.69838	0.0894368	0.819925
ZNF253	ENSG00000256771.5	protein_coding	227.305	0.192803	0.113525	1.69833	0.0894461	0.819925
PTGER1	ENSG00000160951.4	protein_coding	122.331	0.617946	0.363908	1.69808	0.0894919	0.819925
KCMF1	ENSG00000176407.18	protein_coding	4552.02	-0.071042	0.0418494	-1.69756	0.0895902	0.819925
GPCPD1	ENSG00000125772.15	protein_coding	1419.55	-0.0981286	0.0578079	-1.6975	0.089603	0.819925
NUP35	ENSG00000163002.13	protein_coding	523.158	-0.276621	0.16296	-1.69747	0.0896069	0.819925
NAGPA	ENSG00000103174.13	protein_coding	726.031	0.20001	0.117829	1.69746	0.089609	0.819925
EFNB3	ENSG00000108947.5	protein_coding	537.217	-0.478787	0.282068	-1.69742	0.0896175	0.819925
ZNF141	ENSG00000131127.14	protein_coding	312.477	0.145799	0.0859145	1.69703	0.0896912	0.819925
GLIS3	ENSG00000107249.24	protein_coding	1733.81	0.226564	0.133514	1.69694	0.0897081	0.819925
GORASP1	ENSG00000114745.15	protein_coding	2141.58	0.0925931	0.0545704	1.69677	0.089741	0.819925
MAGIX	ENSG00000269313.6	protein_coding	33.7348	0.280978	0.165598	1.69675	0.0897435	0.819925
TRIM52	ENSG00000183718.6	protein_coding	269.024	-0.149748	0.0882742	-1.6964	0.0898102	0.819925
POLD2	ENSG00000106628.13	protein_coding	5544.36	-0.111416	0.0656904	-1.69608	0.08987	0.819925
SURF6	ENSG00000148296.7	protein_coding	1182.54	0.147021	0.0866943	1.69585	0.0899135	0.819925
PCDHGC3	ENSG00000240184.7	protein_coding	4751.58	-0.156278	0.0921633	-1.69567	0.0899487	0.819925
CADM1	ENSG00000182985.19	protein_coding	1586.55	-1.04182	0.614619	-1.69507	0.0900621	0.819925
ERAL1	ENSG00000132591.12	protein_coding	2276.99	-0.0981865	0.0579359	-1.69474	0.0901238	0.819925
NUP85	ENSG00000125450.11	protein_coding	1195.79	-0.165626	0.0977338	-1.69467	0.0901388	0.819925
EPHB6	ENSG00000106123.13	protein_coding	1373.98	-0.71567	0.422359	-1.69446	0.0901781	0.819925
RAD54L2	ENSG00000164080.14	protein_coding	3856.94	0.141171	0.0833569	1.69357	0.090347	0.819925
VCAN	ENSG00000038427.16	protein_coding	23516	0.354149	0.209172	1.6931	0.0904366	0.819925
ZNF217	ENSG00000171940.14	protein_coding	4657.47	-0.105159	0.0621169	-1.69292	0.0904708	0.819925
BAP1	ENSG00000163930.10	protein_coding	4964.01	-0.0579518	0.0342373	-1.69265	0.090522	0.819925
USP39	ENSG00000168883.20	protein_coding	2624.55	-0.0767675	0.0453599	-1.69241	0.090568	0.819925
AJM1	ENSG00000232434.3	protein_coding	480.577	0.217995	0.128833	1.69207	0.0906328	0.819925
CYB5R1	ENSG00000159348.13	protein_coding	2054.64	0.19515	0.115372	1.69149	0.0907425	0.819925
ZFAND3	ENSG00000156639.12	protein_coding	8461.67	0.0952512	0.0563267	1.69105	0.0908277	0.819925
YARS1	ENSG00000134684.13	protein_coding	12383.1	-0.106632	0.0630731	-1.69061	0.090912	0.819925
MST1	ENSG00000173531.16	protein_coding	39.8659	0.451498	0.267189	1.68981	0.0910649	0.819925
STPG2	ENSG00000163116.10	protein_coding	7.93267	0.749445	0.443533	1.68972	0.0910823	0.819925
KIF2C	ENSG00000142945.13	protein_coding	2802.18	-0.369211	0.218527	-1.68955	0.0911145	0.819925
KBTBD4	ENSG00000123444.14	protein_coding	1079.2	0.0859152	0.0508562	1.68937	0.0911478	0.819925
ANKRD49	ENSG00000168876.9	protein_coding	335.323	-0.160038	0.0947672	-1.68875	0.0912668	0.819925
PARP9	ENSG00000138496.17	protein_coding	1560.73	-0.223765	0.132524	-1.68849	0.0913168	0.819925
CATSPER3	ENSG00000152705.8	protein_coding	7.71169	0.824624	0.488881	1.68676	0.0916498	0.819925
MPP1	ENSG00000130830.15	protein_coding	1048.26	0.191505	0.113543	1.68663	0.0916753	0.819925
TTC1	ENSG00000113312.12	protein_coding	1944.58	0.0927232	0.0549769	1.68659	0.0916829	0.819925
RBM22	ENSG00000086589.12	protein_coding	2144.5	-0.0852835	0.0505658	-1.68659	0.0916831	0.819925
SDSL	ENSG00000139410.15	protein_coding	460.042	0.255437	0.151454	1.68656	0.0916877	0.819925
DBN1	ENSG00000113758.14	protein_coding	17338.3	0.207722	0.123191	1.68617	0.0917622	0.819925
SLC22A15	ENSG00000163393.13	protein_coding	430.296	-0.426805	0.253154	-1.68595	0.0918054	0.819925
GAS6	ENSG00000183087.15	protein_coding	15679.2	0.293003	0.173799	1.68587	0.0918207	0.819925
TRIM62	ENSG00000116525.14	protein_coding	3308.63	0.177731	0.105455	1.68537	0.0919163	0.819925
BICD1	ENSG00000151746.15	protein_coding	1987.69	0.122605	0.0728013	1.68411	0.0921603	0.819925
SYT7	ENSG00000011347.10	protein_coding	180.863	-0.886173	0.526206	-1.68408	0.092166	0.819925
ZDHHC6	ENSG00000023041.12	protein_coding	1629.32	-0.177664	0.105502	-1.68399	0.0921835	0.819925
KIRREL1	ENSG00000183853.18	protein_coding	15937	-0.122815	0.0729641	-1.68322	0.0923316	0.819925
CRTC1	ENSG00000105662.16	protein_coding	1090.83	0.100906	0.0599492	1.6832	0.0923368	0.819925
CCDC87	ENSG00000182791.5	protein_coding	28.3373	-0.393362	0.233708	-1.68313	0.092349	0.819925
MDK	ENSG00000110492.17	protein_coding	622.858	-0.296776	0.176349	-1.68289	0.0923968	0.819925
SLC25A26	ENSG00000144741.19	protein_coding	655.463	0.127914	0.0760113	1.68283	0.0924074	0.819925
FAM161A	ENSG00000170264.13	protein_coding	133.911	-0.234571	0.139404	-1.68267	0.0924395	0.819925
PTDSS1	ENSG00000156471.13	protein_coding	5754.08	-0.125164	0.074416	-1.68195	0.0925782	0.819925
HDAC7	ENSG00000061273.18	protein_coding	9560.58	-0.0891966	0.0530389	-1.68172	0.0926229	0.819925
SCAMP2	ENSG00000140497.16	protein_coding	3811.26	0.0991178	0.0589782	1.68058	0.0928437	0.819925
BTBD3	ENSG00000132640.15	protein_coding	3513.75	0.170373	0.101414	1.67998	0.0929617	0.819925
CSDC2	ENSG00000172346.15	protein_coding	70.0845	-0.91442	0.544482	-1.67943	0.0930681	0.819925
NCOR2	ENSG00000196498.15	protein_coding	27348.7	0.13206	0.0786357	1.67939	0.0930767	0.819925
ADGRL4	ENSG00000162618.15	protein_coding	1312.36	-0.440776	0.262465	-1.67937	0.0930795	0.819925
NRP1	ENSG00000099250.18	protein_coding	37598.2	-0.133928	0.079749	-1.67937	0.0930797	0.819925
SANBR	ENSG00000162929.14	protein_coding	415.547	-0.207457	0.123542	-1.67924	0.0931053	0.819925
RUBCN	ENSG00000145016.17	protein_coding	2612.08	0.0946648	0.0563849	1.6789	0.093171	0.819925
STEAP1B	ENSG00000105889.16	protein_coding	711.057	-0.383032	0.228167	-1.67874	0.0932035	0.819925
RNASET2	ENSG00000026297.17	protein_coding	127.8	0.33187	0.197708	1.67859	0.0932324	0.819925
POLE2	ENSG00000100479.14	protein_coding	269.53	-0.371587	0.221432	-1.67811	0.0933259	0.819925
MMP2	ENSG00000087245.13	protein_coding	55686.8	-0.211961	0.126353	-1.67753	0.0934389	0.819925
AAAS	ENSG00000094914.14	protein_coding	2453.4	-0.136984	0.0816688	-1.67732	0.0934807	0.819925
COL5A1	ENSG00000130635.17	protein_coding	198793	0.241814	0.14419	1.67706	0.0935312	0.819925
PSORS1C1	ENSG00000204540.11	protein_coding	34.6438	0.745769	0.444752	1.67682	0.0935775	0.819925
LYRM9	ENSG00000232859.10	protein_coding	150.012	0.258237	0.154042	1.67641	0.0936581	0.819925
B3GALT4	ENSG00000235863.4	protein_coding	55.4981	-0.370499	0.221022	-1.6763	0.09368	0.819925
INHBE	ENSG00000139269.3	protein_coding	48.5156	-0.549139	0.327631	-1.67609	0.0937203	0.819925
MIB2	ENSG00000197530.13	protein_coding	1892.72	0.150418	0.0897484	1.676	0.0937385	0.819925
NIPAL1	ENSG00000163293.12	protein_coding	195.224	0.407693	0.243265	1.67592	0.0937531	0.819925
TIRAP	ENSG00000150455.15	protein_coding	523.704	0.104027	0.0620741	1.67585	0.0937671	0.819925
TMEM158	ENSG00000249992.2	protein_coding	1620.9	0.270753	0.161583	1.67562	0.0938118	0.819925
TNFRSF1B	ENSG00000028137.19	protein_coding	252.823	-0.510046	0.304415	-1.6755	0.0938366	0.819925
GBGT1	ENSG00000148288.13	protein_coding	209.7	-0.28881	0.172414	-1.67509	0.0939166	0.819925
ARHGAP39	ENSG00000147799.12	protein_coding	533.647	0.175907	0.105014	1.67508	0.0939194	0.819925
DNER	ENSG00000187957.8	protein_coding	131.092	-1.10283	0.658995	-1.67351	0.0942279	0.819925
CUL2	ENSG00000108094.17	protein_coding	3516.83	-0.081583	0.0487553	-1.67332	0.0942649	0.819925
LIMD2	ENSG00000136490.9	protein_coding	250.578	-0.286321	0.171115	-1.67327	0.0942749	0.819925
HSD17B7	ENSG00000132196.16	protein_coding	132.866	0.214079	0.127945	1.67321	0.0942868	0.819925
MXD4	ENSG00000123933.17	protein_coding	8223.44	0.192212	0.114887	1.67304	0.0943187	0.819925
COL4A1	ENSG00000187498.17	protein_coding	46770.2	0.431864	0.258245	1.6723	0.0944653	0.819925
TRAPPC13	ENSG00000113597.19	protein_coding	734.303	-0.126929	0.0759209	-1.67186	0.094551	0.819925
CLU	ENSG00000120885.22	protein_coding	2589.87	0.348832	0.208696	1.67148	0.0946265	0.819925
ERCC6L	ENSG00000186871.7	protein_coding	858.247	-0.454852	0.272129	-1.67146	0.0946312	0.819925
POT1	ENSG00000128513.16	protein_coding	894.742	-0.1385	0.0828675	-1.67135	0.0946535	0.819925
H2BC9	ENSG00000275713.3	protein_coding	1071	-0.446557	0.2674	-1.66999	0.0949205	0.819925
PCGF6	ENSG00000156374.16	protein_coding	519.936	-0.14935	0.0894427	-1.66979	0.0949615	0.819925
MIOS	ENSG00000164654.16	protein_coding	1472.29	-0.112979	0.0676729	-1.66949	0.0950211	0.819925
DDRGK1	ENSG00000198171.13	protein_coding	1160.99	0.132777	0.0795765	1.66854	0.0952077	0.819925
GFM1	ENSG00000168827.15	protein_coding	3023.24	-0.0965824	0.0578879	-1.66844	0.0952288	0.819925
PTER	ENSG00000165983.15	protein_coding	217.059	-0.425646	0.255124	-1.66839	0.0952383	0.819925
UBIAD1	ENSG00000120942.14	protein_coding	1530.76	-0.0991684	0.0594488	-1.66813	0.09529	0.819925
ALKBH5	ENSG00000091542.9	protein_coding	10763.2	0.102954	0.0617189	1.66812	0.0952925	0.819925
SKA3	ENSG00000165480.16	protein_coding	1356.13	-0.352787	0.211502	-1.66801	0.095314	0.819925
PAPPA2	ENSG00000116183.11	protein_coding	207.502	-0.835996	0.501271	-1.66775	0.095365	0.819925
RNF180	ENSG00000164197.12	protein_coding	165.563	0.24659	0.147876	1.66755	0.0954049	0.819925
FAM228B	ENSG00000219626.9	protein_coding	61.4053	0.335651	0.201304	1.66738	0.0954379	0.819925
ADAT1	ENSG00000065457.11	protein_coding	1873.35	-0.139055	0.0834018	-1.66729	0.0954576	0.819925
SLC39A6	ENSG00000141424.13	protein_coding	6835.97	-0.080611	0.0483582	-1.66695	0.0955235	0.819925
PARP3	ENSG00000041880.15	protein_coding	1587.87	0.21608	0.12963	1.6669	0.0955344	0.819925
PTGIR	ENSG00000160013.10	protein_coding	564.753	-0.326244	0.19576	-1.66656	0.0956029	0.819925
RAB5B	ENSG00000111540.16	protein_coding	8648.92	0.0743671	0.044635	1.66612	0.0956901	0.819925
CERT1	ENSG00000113163.19	protein_coding	2229.78	0.100767	0.0604814	1.66608	0.0956974	0.819925
HDGF	ENSG00000143321.19	protein_coding	21926.3	-0.0674407	0.0404886	-1.66567	0.0957786	0.819925
PKP2	ENSG00000057294.19	protein_coding	34.3714	0.854302	0.512957	1.66544	0.0958241	0.819925
RPL31	ENSG00000071082.11	protein_coding	9370.71	0.140466	0.0843459	1.66535	0.0958425	0.819925
NOXA1	ENSG00000188747.9	protein_coding	7.20407	0.873145	0.52433	1.66526	0.0958609	0.819925
HTATIP2	ENSG00000109854.14	protein_coding	1113.6	-0.322038	0.193406	-1.66509	0.0958951	0.819925
CIT	ENSG00000122966.18	protein_coding	4319.05	-0.286153	0.171865	-1.66499	0.0959147	0.819925
ZNF777	ENSG00000196453.8	protein_coding	1629.82	-0.0772698	0.046409	-1.66497	0.0959179	0.819925
DYNLT4	ENSG00000188396.4	protein_coding	3.60807	1.10345	0.662785	1.66487	0.0959394	0.819925
MAFK	ENSG00000198517.10	protein_coding	2170.46	0.155884	0.093643	1.66467	0.0959793	0.819925
PICK1	ENSG00000100151.16	protein_coding	652.423	0.145236	0.0872741	1.66413	0.0960856	0.819925
EFR3B	ENSG00000084710.14	protein_coding	43.0639	-0.465812	0.279928	-1.66404	0.0961043	0.819925
H3-3B	ENSG00000132475.10	protein_coding	15031.7	-0.107743	0.0647626	-1.66367	0.0961792	0.819925
COG2	ENSG00000135775.14	protein_coding	1107.39	-0.0957114	0.0575316	-1.66363	0.0961859	0.819925
TWF1	ENSG00000151239.14	protein_coding	12299.1	-0.0909974	0.0547057	-1.6634	0.0962331	0.819925
ZNF721	ENSG00000182903.16	protein_coding	613.089	0.150517	0.0905029	1.66312	0.0962881	0.819925
MRPL58	ENSG00000167862.10	protein_coding	866.801	-0.15742	0.0946873	-1.66253	0.0964074	0.819925
PTGR2	ENSG00000140043.12	protein_coding	100.754	-0.334616	0.201282	-1.66242	0.0964282	0.819925
GUK1	ENSG00000143774.18	protein_coding	4773.62	0.0995803	0.0599086	1.6622	0.0964719	0.819925
PITPNB	ENSG00000180957.19	protein_coding	5969.75	-0.0905391	0.0545065	-1.66107	0.0966994	0.819925
CRIP2	ENSG00000182809.11	protein_coding	398.096	0.562251	0.338532	1.66085	0.0967437	0.819925
SNRPB	ENSG00000125835.20	protein_coding	4020.44	-0.132317	0.079673	-1.66075	0.0967634	0.819925
MED12L	ENSG00000144893.13	protein_coding	40.4554	0.435647	0.262358	1.66051	0.0968124	0.819925
PBK	ENSG00000168078.10	protein_coding	2293.74	-0.361022	0.21755	-1.65949	0.0970174	0.819925
PIP5K1C	ENSG00000186111.11	protein_coding	7963.86	0.12575	0.0757912	1.65916	0.0970843	0.819925
B3GNT5	ENSG00000176597.12	protein_coding	184.868	-0.420096	0.253234	-1.65893	0.0971306	0.819925
CFAP36	ENSG00000163001.12	protein_coding	512.095	0.169108	0.101939	1.65891	0.0971335	0.819925
PPP1CB	ENSG00000213639.11	protein_coding	19037.8	-0.0708702	0.0427247	-1.65876	0.0971635	0.819925
F2RL1	ENSG00000164251.5	protein_coding	78.3648	-1.10134	0.664029	-1.65857	0.097203	0.819925
MRPL33	ENSG00000243147.8	protein_coding	377.061	0.177127	0.106811	1.65832	0.097252	0.819925
FGF1	ENSG00000113578.18	protein_coding	1452.8	0.415015	0.250312	1.65799	0.0973198	0.819925
SYPL2	ENSG00000143028.9	protein_coding	55.9403	0.737215	0.444853	1.65721	0.0974766	0.819925
DDIAS	ENSG00000165490.13	protein_coding	488.282	-0.393859	0.237704	-1.65693	0.097534	0.819925
TARS3	ENSG00000185418.16	protein_coding	412.564	0.142725	0.0861431	1.65684	0.0975526	0.819925
RASA1	ENSG00000145715.15	protein_coding	4678.95	-0.169953	0.102599	-1.65649	0.0976232	0.819925
REPS1	ENSG00000135597.19	protein_coding	1599.43	-0.0691733	0.0417644	-1.65627	0.0976664	0.819925
CFAP58	ENSG00000120051.15	protein_coding	22.7511	0.525866	0.317534	1.65609	0.0977027	0.819925
FBXO48	ENSG00000204923.4	protein_coding	146.01	-0.232544	0.140467	-1.65551	0.0978219	0.819925
CCNA2	ENSG00000145386.11	protein_coding	5269.44	-0.35557	0.214825	-1.65516	0.0978917	0.819925
ABHD14A	ENSG00000248487.10	protein_coding	186.839	0.215688	0.130312	1.65516	0.0978921	0.819925
PCCB	ENSG00000114054.14	protein_coding	2077.58	0.10263	0.0620177	1.65485	0.0979555	0.819925
SLC4A11	ENSG00000088836.14	protein_coding	216.216	-0.231461	0.139868	-1.65485	0.0979557	0.819925
NUP155	ENSG00000113569.17	protein_coding	4733.92	-0.211904	0.128061	-1.65471	0.0979827	0.819925
WDR5	ENSG00000196363.10	protein_coding	2768.83	-0.0930582	0.0562386	-1.6547	0.097985	0.819925
SOCS3	ENSG00000184557.4	protein_coding	3424.55	-0.239033	0.144498	-1.65422	0.0980819	0.819925
NHSL3	ENSG00000162522.11	protein_coding	3191.27	-0.250699	0.151614	-1.65353	0.0982222	0.819925
IFIT3	ENSG00000119917.15	protein_coding	1093.66	-0.218821	0.132338	-1.6535	0.0982285	0.819925
CPSF2	ENSG00000165934.13	protein_coding	7622.89	-0.051213	0.0309788	-1.65316	0.0982982	0.819925
SORD	ENSG00000140263.15	protein_coding	958.155	-0.135054	0.0817217	-1.65261	0.0984112	0.819925
QPCTL	ENSG00000011478.13	protein_coding	697.594	0.121646	0.0736183	1.65239	0.0984542	0.819925
GATD1	ENSG00000177225.17	protein_coding	1888	0.124416	0.0753197	1.65184	0.0985663	0.819925
L3MBTL1	ENSG00000185513.18	protein_coding	23.05	0.436389	0.264271	1.6513	0.098678	0.819925
ZNF326	ENSG00000162664.17	protein_coding	1706.21	-0.12041	0.0729195	-1.65128	0.0986818	0.819925
INTS11	ENSG00000127054.22	protein_coding	2724.62	-0.122035	0.073939	-1.65048	0.0988447	0.819925
HDAC2	ENSG00000196591.12	protein_coding	5472.63	-0.0810744	0.0491307	-1.65018	0.0989064	0.819925
DBF4	ENSG00000006634.8	protein_coding	1103.25	-0.315064	0.190956	-1.64993	0.0989563	0.819925
BFAR	ENSG00000103429.11	protein_coding	4111.2	-0.0656767	0.0398092	-1.64979	0.0989866	0.819925
MIIP	ENSG00000116691.11	protein_coding	495.214	-0.172282	0.104427	-1.64978	0.0989886	0.819925
ZACN	ENSG00000186919.13	protein_coding	9.38305	1.17204	0.710455	1.64971	0.0990025	0.819925
ACAP2	ENSG00000114331.16	protein_coding	6942.77	-0.0774857	0.0469772	-1.64943	0.0990593	0.819925
DIPK2A	ENSG00000181744.9	protein_coding	3090.51	0.108683	0.0658916	1.64942	0.0990614	0.819925
PIEZO2	ENSG00000154864.14	protein_coding	1968.61	0.619063	0.375442	1.64889	0.0991694	0.819925
CDH6	ENSG00000113361.13	protein_coding	1901.41	0.729878	0.442706	1.64867	0.0992143	0.819925
PRMT5	ENSG00000100462.16	protein_coding	4275.63	-0.0886912	0.053796	-1.64866	0.099218	0.819925
GPAM	ENSG00000119927.14	protein_coding	1064.62	-0.144891	0.0879175	-1.64804	0.0993447	0.819925
PRKD3	ENSG00000115825.11	protein_coding	5508.34	-0.123076	0.0746902	-1.64782	0.0993899	0.819925
NR2C1	ENSG00000120798.17	protein_coding	555.131	-0.114065	0.0692367	-1.64746	0.0994638	0.819925
CAVIN2	ENSG00000168497.5	protein_coding	691.334	0.61335	0.372367	1.64717	0.0995237	0.819925
ZZEF1	ENSG00000074755.15	protein_coding	5432.98	0.0919731	0.0558463	1.6469	0.099579	0.819925
FKBP15	ENSG00000119321.10	protein_coding	3027.98	0.0531211	0.0322611	1.6466	0.0996398	0.819925
ADGRA3	ENSG00000152990.14	protein_coding	1662.83	-0.144896	0.0880051	-1.64645	0.0996715	0.819925
PIANP	ENSG00000139200.14	protein_coding	78.4988	-0.616915	0.374795	-1.64601	0.0997617	0.819925
PDP2	ENSG00000172840.7	protein_coding	1227.9	-0.158691	0.0964354	-1.64556	0.0998535	0.819925
C1orf52	ENSG00000162642.14	protein_coding	782.954	0.12228	0.0743108	1.64553	0.0998614	0.819925
FOXN2	ENSG00000170802.17	protein_coding	2004.03	-0.126778	0.0770537	-1.64531	0.099905	0.819925
ARSI	ENSG00000183876.9	protein_coding	1003.85	-0.418069	0.254166	-1.64487	0.0999974	0.819925
GPR63	ENSG00000112218.9	protein_coding	31.8494	0.878164	0.533904	1.6448	0.100012	0.819925
PPP3CB	ENSG00000107758.16	protein_coding	4310.68	-0.074313	0.045189	-1.64449	0.100075	0.819925
TMEM98	ENSG00000006042.12	protein_coding	2951.29	-0.120575	0.0733222	-1.64446	0.100082	0.819925
ARHGAP45	ENSG00000180448.11	protein_coding	29.4303	0.474824	0.288777	1.64426	0.100123	0.819925
POLR3B	ENSG00000013503.10	protein_coding	1964.77	-0.107997	0.0656855	-1.64415	0.100146	0.819925
CYP20A1	ENSG00000119004.17	protein_coding	2918.39	0.101069	0.0614791	1.64396	0.100185	0.819925
AMOTL2	ENSG00000114019.15	protein_coding	27554.4	0.129957	0.0790542	1.6439	0.100197	0.819925
TTC5	ENSG00000136319.12	protein_coding	1044.69	-0.0989096	0.0601745	-1.64371	0.100236	0.819925
ACOX1	ENSG00000161533.12	protein_coding	5400.6	0.125199	0.0761794	1.64348	0.100283	0.819925
ZNF572	ENSG00000180938.6	protein_coding	62.6875	-0.235854	0.143543	-1.64308	0.100366	0.819925
IP6K2	ENSG00000068745.15	protein_coding	1655.17	0.143682	0.0874559	1.6429	0.100403	0.819925
SPMIP1	ENSG00000272899.4	protein_coding	40.8832	0.371984	0.226555	1.64192	0.100607	0.821101
NUCB2	ENSG00000070081.18	protein_coding	3167.91	0.132132	0.0805071	1.64124	0.100747	0.821283
WDTC1	ENSG00000142784.16	protein_coding	4974.63	0.0914605	0.0557269	1.64123	0.10075	0.821283
SART3	ENSG00000075856.12	protein_coding	2218.66	-0.0953775	0.0581245	-1.64092	0.100815	0.821318
VPS37A	ENSG00000155975.10	protein_coding	3079.79	-0.0854438	0.0521101	-1.63968	0.101072	0.822239
ASAP3	ENSG00000088280.21	protein_coding	1163.26	-0.306232	0.186772	-1.6396	0.101089	0.822239
NEK10	ENSG00000163491.18	protein_coding	417.534	0.216241	0.131898	1.63945	0.101119	0.822239
PPP2R5A	ENSG00000066027.12	protein_coding	2450.47	-0.122113	0.0745076	-1.63894	0.101226	0.822239
ADRA1B	ENSG00000170214.5	protein_coding	27.4056	0.492006	0.300201	1.63892	0.10123	0.822239
FNIP1	ENSG00000217128.13	protein_coding	3918.23	-0.104606	0.0638575	-1.63811	0.101398	0.822542
SORT1	ENSG00000134243.12	protein_coding	8093.77	0.258972	0.158108	1.63794	0.101435	0.822542
AURKA	ENSG00000087586.18	protein_coding	2896.31	-0.376581	0.229958	-1.63761	0.101504	0.822542
C14orf28	ENSG00000179476.8	protein_coding	325.762	0.236684	0.144533	1.63758	0.10151	0.822542
PPP2R3C	ENSG00000092020.11	protein_coding	910.923	-0.16896	0.103264	-1.6362	0.101798	0.824392
RNF149	ENSG00000163162.9	protein_coding	1553.2	-0.12442	0.0760721	-1.63556	0.101932	0.824686
YWHAH	ENSG00000128245.15	protein_coding	7661.68	-0.133543	0.0816558	-1.63544	0.101956	0.824686
APOBEC3B	ENSG00000179750.16	protein_coding	839.258	-0.319466	0.195438	-1.63462	0.102129	0.82541
ZNF429	ENSG00000197013.11	protein_coding	191.109	0.300815	0.184061	1.63433	0.10219	0.82541
PARD6G	ENSG00000178184.16	protein_coding	58.0851	-0.592468	0.362555	-1.63415	0.102228	0.82541
WIPF2	ENSG00000171475.14	protein_coding	4748.09	0.0860117	0.0526612	1.6333	0.102405	0.826353
CACNA1A	ENSG00000141837.23	protein_coding	153.794	0.622635	0.381292	1.63296	0.102477	0.826444
JAM2	ENSG00000154721.15	protein_coding	669.778	0.465088	0.284989	1.63195	0.10269	0.82715
EEIG2	ENSG00000162636.16	protein_coding	1344.1	-0.163298	0.100126	-1.63091	0.102908	0.82715
KIF14	ENSG00000118193.12	protein_coding	2245.2	-0.35229	0.216023	-1.6308	0.102932	0.82715
HOOK2	ENSG00000095066.12	protein_coding	357.173	0.142696	0.087506	1.6307	0.102954	0.82715
CIRBP	ENSG00000099622.14	protein_coding	5917.26	0.0960085	0.0588767	1.63067	0.10296	0.82715
SKA1	ENSG00000154839.10	protein_coding	1836.24	-0.358428	0.21996	-1.62951	0.103204	0.82715
CREB3	ENSG00000107175.12	protein_coding	4812.8	0.0958744	0.0588384	1.62945	0.103217	0.82715
ZNF708	ENSG00000182141.11	protein_coding	382.687	0.168697	0.103532	1.62941	0.103225	0.82715
ILK	ENSG00000166333.14	protein_coding	12709.8	-0.128246	0.0787293	-1.62895	0.103323	0.82715
CNTN3	ENSG00000113805.9	protein_coding	743.569	-0.283267	0.173964	-1.62831	0.103459	0.82715
MRPL54	ENSG00000183617.5	protein_coding	1211.31	0.156323	0.0960158	1.62809	0.103505	0.82715
PSMG2	ENSG00000128789.22	protein_coding	1947.93	-0.109159	0.0670984	-1.62685	0.103769	0.82715
MOSMO	ENSG00000185716.12	protein_coding	728.797	-0.111951	0.0688203	-1.62671	0.103798	0.82715
SOAT1	ENSG00000057252.13	protein_coding	3463.28	-0.176253	0.108396	-1.626	0.103949	0.82715
APH1B	ENSG00000138613.14	protein_coding	1277.83	-0.115178	0.0708422	-1.62583	0.103985	0.82715
SH2D5	ENSG00000189410.12	protein_coding	463.25	0.345693	0.212686	1.62537	0.104085	0.82715
FUCA1	ENSG00000179163.12	protein_coding	493.784	0.186778	0.114948	1.62489	0.104185	0.82715
OSBPL11	ENSG00000144909.8	protein_coding	1731.75	-0.11283	0.0694399	-1.62486	0.104193	0.82715
FANCE	ENSG00000112039.6	protein_coding	668.566	-0.177541	0.109268	-1.62481	0.104203	0.82715
ACTR6	ENSG00000075089.10	protein_coding	657.367	-0.115388	0.0710186	-1.62476	0.104214	0.82715
RHBDL3	ENSG00000141314.13	protein_coding	16.8957	-0.561021	0.345435	-1.6241	0.104354	0.82715
ASNS	ENSG00000070669.17	protein_coding	10982	-0.285685	0.175972	-1.62347	0.104489	0.82715
ALAD	ENSG00000148218.16	protein_coding	1569.47	0.155424	0.0957368	1.62345	0.104493	0.82715
TYW3	ENSG00000162623.16	protein_coding	1223.85	-0.140069	0.0862881	-1.62327	0.104531	0.82715
ADCK2	ENSG00000133597.11	protein_coding	657.188	0.183259	0.112908	1.62308	0.104572	0.82715
KBTBD2	ENSG00000170852.12	protein_coding	2255.74	-0.126532	0.0779728	-1.62277	0.104638	0.82715
KRT23	ENSG00000108244.17	protein_coding	6.90539	1.46483	0.9028	1.62254	0.104688	0.82715
ZNF660	ENSG00000144792.9	protein_coding	193.48	-0.214575	0.132247	-1.62254	0.104688	0.82715
NDC80	ENSG00000080986.13	protein_coding	1701.17	-0.378561	0.233357	-1.62224	0.104752	0.82715
GCLM	ENSG00000023909.10	protein_coding	4490.46	-0.145573	0.0897768	-1.62149	0.104912	0.82715
WDR75	ENSG00000115368.10	protein_coding	2000.15	-0.0868886	0.0535974	-1.62113	0.104989	0.82715
BASP1	ENSG00000176788.9	protein_coding	14761.6	0.180122	0.11111	1.62112	0.104993	0.82715
SCAMP5	ENSG00000198794.12	protein_coding	244.011	-0.67221	0.414696	-1.62097	0.105024	0.82715
TRA2B	ENSG00000136527.19	protein_coding	6481.35	-0.0852198	0.0525884	-1.62051	0.105124	0.82715
WDR47	ENSG00000085433.17	protein_coding	1249.14	0.106947	0.0659991	1.62043	0.105141	0.82715
KPNA2	ENSG00000182481.10	protein_coding	16244.3	-0.287943	0.177718	-1.62023	0.105184	0.82715
TCEA1	ENSG00000187735.16	protein_coding	7455.98	-0.206221	0.127311	-1.61982	0.10527	0.82715
EOLA1	ENSG00000197620.11	protein_coding	426.566	0.21776	0.134442	1.61973	0.105291	0.82715
S1PR2	ENSG00000267534.4	protein_coding	1800.41	-0.170871	0.105497	-1.61968	0.105301	0.82715
MAT2A	ENSG00000168906.13	protein_coding	8244.05	-0.148301	0.0915838	-1.61929	0.105385	0.82715
CBX5	ENSG00000094916.16	protein_coding	31240.5	-0.209055	0.129167	-1.61849	0.105558	0.82715
TMX3	ENSG00000166479.10	protein_coding	6511.46	-0.0799683	0.0494152	-1.61829	0.105599	0.82715
AP1AR	ENSG00000138660.12	protein_coding	927.781	-0.118138	0.0730065	-1.61818	0.105624	0.82715
RBP4	ENSG00000138207.15	protein_coding	9.40995	0.87649	0.541715	1.61799	0.105664	0.82715
RHOC	ENSG00000155366.17	protein_coding	11741.6	-0.0997797	0.0616771	-1.61778	0.105711	0.82715
SHB	ENSG00000107338.10	protein_coding	793.713	0.146991	0.0908725	1.61755	0.10576	0.82715
DRG2	ENSG00000108591.10	protein_coding	1299.27	0.0594951	0.0367847	1.61739	0.105795	0.82715
YEATS4	ENSG00000127337.7	protein_coding	531.492	-0.215981	0.133555	-1.61717	0.105841	0.82715
CDKL2	ENSG00000138769.11	protein_coding	39.9181	-0.456606	0.282356	-1.61713	0.10585	0.82715
CENPQ	ENSG00000031691.7	protein_coding	400.697	-0.398766	0.246751	-1.61607	0.10608	0.82715
TXNRD3	ENSG00000197763.20	protein_coding	630.726	0.112507	0.0696225	1.61596	0.106102	0.82715
GPSM1	ENSG00000160360.13	protein_coding	5415.41	0.0968321	0.0599419	1.61543	0.106217	0.82715
SNX5	ENSG00000089006.17	protein_coding	3707.16	-0.0888454	0.0550039	-1.61526	0.106255	0.82715
GSPT2	ENSG00000189369.9	protein_coding	885.493	-0.0979957	0.0606778	-1.61502	0.106306	0.82715
UTP20	ENSG00000120800.5	protein_coding	3567.75	-0.129625	0.0802793	-1.61467	0.106382	0.82715
SLFN12	ENSG00000172123.14	protein_coding	1202.14	0.204438	0.126655	1.61414	0.106497	0.82715
NISCH	ENSG00000010322.16	protein_coding	4453.31	0.163531	0.101319	1.61403	0.106522	0.82715
MELK	ENSG00000165304.8	protein_coding	2529.5	-0.311438	0.192959	-1.61401	0.106524	0.82715
NIT1	ENSG00000158793.14	protein_coding	922.69	-0.08796	0.054516	-1.61347	0.106642	0.82715
H1-10	ENSG00000184897.7	protein_coding	5105.78	-0.166779	0.10338	-1.61326	0.106688	0.82715
DMPK	ENSG00000104936.20	protein_coding	3269.41	0.244212	0.151384	1.61319	0.106703	0.82715
NUDT5	ENSG00000165609.14	protein_coding	1814.94	-0.0844751	0.0523738	-1.61293	0.10676	0.82715
ZNF276	ENSG00000158805.12	protein_coding	578.23	0.175211	0.108652	1.61259	0.106834	0.82715
C13orf46	ENSG00000283199.3	protein_coding	194.649	0.276643	0.1716	1.61214	0.106931	0.82715
ENSG00000286190	ENSG00000286190.2	protein_coding	802.498	0.348041	0.215919	1.61191	0.106982	0.82715
NAGA	ENSG00000198951.12	protein_coding	2874.33	-0.105907	0.0657314	-1.61121	0.107134	0.82715
COL4A4	ENSG00000081052.14	protein_coding	51.4908	0.802829	0.498417	1.61076	0.107233	0.82715
SLC25A42	ENSG00000181035.14	protein_coding	446.792	0.128324	0.0796715	1.61066	0.107254	0.82715
ALG10B	ENSG00000175548.9	protein_coding	643.709	-0.237997	0.147838	-1.60985	0.10743	0.82715
GAN	ENSG00000261609.9	protein_coding	2417.83	0.162179	0.100747	1.60977	0.107448	0.82715
ZFP91	ENSG00000186660.15	protein_coding	7488.82	-0.0582497	0.0361899	-1.60956	0.107494	0.82715
RETSAT	ENSG00000042445.14	protein_coding	3237.86	0.155433	0.0965912	1.60919	0.107575	0.82715
DGCR6L	ENSG00000128185.10	protein_coding	1651.67	0.100523	0.0624794	1.60891	0.107637	0.82715
FAM72B	ENSG00000188610.12	protein_coding	107.973	-0.385484	0.239628	-1.60867	0.107687	0.82715
TIMELESS	ENSG00000111602.12	protein_coding	2357.7	-0.292136	0.181612	-1.60857	0.10771	0.82715
SLA	ENSG00000155926.14	protein_coding	5.1786	-1.14659	0.712888	-1.60838	0.107753	0.82715
GPS2	ENSG00000132522.16	protein_coding	32.0448	0.371615	0.231159	1.60762	0.107919	0.82715
ANKRD52	ENSG00000139645.11	protein_coding	17539.9	0.151679	0.0943541	1.60755	0.107934	0.82715
PIWIL2	ENSG00000197181.12	protein_coding	3.1537	-1.47583	0.918065	-1.60754	0.107936	0.82715
RWDD2A	ENSG00000013392.8	protein_coding	486.753	0.164137	0.102114	1.60739	0.107969	0.82715
METTL23	ENSG00000181038.14	protein_coding	354.832	-0.134364	0.083609	-1.60705	0.108042	0.82715
PEBP1	ENSG00000089220.5	protein_coding	9165.96	0.111748	0.0695609	1.60648	0.108169	0.82715
TMEM131	ENSG00000075568.17	protein_coding	5517.43	-0.110036	0.0684953	-1.60647	0.108171	0.82715
CCNB1	ENSG00000134057.15	protein_coding	7006.36	-0.305896	0.190445	-1.60622	0.108226	0.82715
ZNF202	ENSG00000166261.11	protein_coding	487.951	-0.119925	0.0746718	-1.60603	0.108268	0.82715
TBX4	ENSG00000121075.11	protein_coding	23.5805	-1.02512	0.638405	-1.60576	0.108328	0.82715
CACNA2D1	ENSG00000153956.17	protein_coding	4128.72	0.117855	0.0734056	1.60553	0.108378	0.82715
SPOCD1	ENSG00000134668.13	protein_coding	4219.87	0.28678	0.178645	1.6053	0.108427	0.82715
EVA1C	ENSG00000166979.13	protein_coding	124.895	0.478163	0.297874	1.60525	0.108438	0.82715
MLYCD	ENSG00000103150.7	protein_coding	133.892	0.203054	0.126497	1.60521	0.108447	0.82715
DLL1	ENSG00000198719.9	protein_coding	113.237	-0.28733	0.179085	-1.60443	0.108618	0.82715
NUAK1	ENSG00000074590.14	protein_coding	1697.89	0.320259	0.19964	1.60419	0.108673	0.82715
GYPE	ENSG00000197465.14	protein_coding	52.1371	0.727249	0.4534	1.60399	0.108717	0.82715
KRT17	ENSG00000128422.18	protein_coding	573.281	0.956224	0.596289	1.60363	0.108797	0.82715
PDE10A	ENSG00000112541.19	protein_coding	11.5825	-0.747315	0.466081	-1.6034	0.108846	0.82715
ZNF37A	ENSG00000075407.19	protein_coding	1599.43	0.165141	0.102998	1.60335	0.108857	0.82715
STX6	ENSG00000135823.14	protein_coding	3279.21	0.106817	0.0666335	1.60305	0.108923	0.82715
KAT2B	ENSG00000114166.8	protein_coding	1263.07	0.139228	0.0868746	1.60263	0.109016	0.82715
LTB4R2	ENSG00000213906.10	protein_coding	53.4783	0.299504	0.186915	1.60236	0.109076	0.82715
JUN	ENSG00000177606.9	protein_coding	7503.83	0.164066	0.102407	1.60209	0.109135	0.82715
TRADD	ENSG00000102871.16	protein_coding	754.687	0.134899	0.0842212	1.60173	0.109216	0.82715
PHLDA1	ENSG00000139289.15	protein_coding	4205.92	-0.431011	0.2692	-1.60108	0.109359	0.82715
BMAL2	ENSG00000029153.15	protein_coding	2133.05	-0.276944	0.172975	-1.60107	0.109362	0.82715
CELSR1	ENSG00000075275.18	protein_coding	428.593	0.623034	0.389178	1.6009	0.1094	0.82715
UBALD2	ENSG00000185262.9	protein_coding	1644.09	-0.259756	0.16226	-1.60086	0.109408	0.82715
ZNF821	ENSG00000102984.15	protein_coding	170.905	0.223326	0.139506	1.60084	0.109413	0.82715
SESN3	ENSG00000149212.12	protein_coding	4471.2	0.436873	0.272998	1.60028	0.109536	0.82715
PYROXD1	ENSG00000121350.16	protein_coding	1321.42	-0.239109	0.14944	-1.60003	0.109591	0.82715
MCMBP	ENSG00000197771.13	protein_coding	4475.09	-0.130284	0.0814259	-1.60003	0.109592	0.82715
EXT2	ENSG00000151348.16	protein_coding	9496.98	0.1018	0.0636392	1.59964	0.109678	0.82715
CAMK2B	ENSG00000058404.21	protein_coding	7.95011	0.845905	0.528987	1.5991	0.109798	0.82715
ZNF264	ENSG00000083844.11	protein_coding	3213.74	0.135889	0.0849875	1.59893	0.109836	0.82715
ITGA9	ENSG00000144668.12	protein_coding	5.51133	-1.10031	0.688203	-1.59881	0.109863	0.82715
FOXC1	ENSG00000054598.9	protein_coding	4247.82	-0.171711	0.107414	-1.59859	0.109912	0.82715
ACTA1	ENSG00000143632.15	protein_coding	70.4585	0.286066	0.178968	1.59841	0.109951	0.82715
ZSCAN32	ENSG00000140987.21	protein_coding	523.675	0.130351	0.0815578	1.59827	0.109983	0.82715
COL18A1	ENSG00000182871.16	protein_coding	6662.61	0.427246	0.267393	1.59782	0.110083	0.82715
DOCK9	ENSG00000088387.22	protein_coding	1685.66	0.144279	0.0903013	1.59775	0.110099	0.82715
CGGBP1	ENSG00000163320.12	protein_coding	7001.64	-0.0880655	0.0551287	-1.59745	0.110165	0.82715
HACD1	ENSG00000165996.14	protein_coding	1874.63	0.171137	0.107142	1.59729	0.110202	0.82715
CTBP1	ENSG00000159692.18	protein_coding	8937.24	0.041421	0.0259328	1.59724	0.110212	0.82715
HIP1R	ENSG00000130787.14	protein_coding	698.123	0.242674	0.151941	1.59716	0.110229	0.82715
MAP6D1	ENSG00000180834.8	protein_coding	54.7827	0.285471	0.178754	1.59701	0.110264	0.82715
GTPBP2	ENSG00000172432.19	protein_coding	2872.7	-0.169413	0.106116	-1.59649	0.11038	0.82715
CERS1	ENSG00000223802.9	protein_coding	12.2	0.519458	0.325551	1.59563	0.110572	0.82715
RPL37	ENSG00000145592.14	protein_coding	9982.97	0.138171	0.0865945	1.59561	0.110576	0.82715
PCSK7	ENSG00000160613.15	protein_coding	3539.66	0.165502	0.103739	1.59538	0.110628	0.82715
MACROH2A1	ENSG00000113648.17	protein_coding	6088.59	-0.115086	0.0721407	-1.5953	0.110645	0.82715
CDCA8	ENSG00000134690.11	protein_coding	2377.47	-0.358367	0.22472	-1.59472	0.110774	0.82715
GADD45B	ENSG00000099860.10	protein_coding	1455.66	0.241855	0.151719	1.5941	0.110914	0.82715
TBC1D31	ENSG00000156787.17	protein_coding	655.251	-0.173855	0.109068	-1.594	0.110936	0.82715
SGMS2	ENSG00000164023.15	protein_coding	5805.19	0.121963	0.0765141	1.594	0.110937	0.82715
PEX5	ENSG00000139197.11	protein_coding	2020.39	-0.142708	0.0895396	-1.5938	0.110982	0.82715
GALK1	ENSG00000108479.13	protein_coding	1050.58	-0.0975842	0.06123	-1.59373	0.110996	0.82715
EPS8L1	ENSG00000131037.15	protein_coding	57.6057	-0.53623	0.336561	-1.59326	0.111101	0.82715
EFHD1	ENSG00000115468.13	protein_coding	773.544	0.398801	0.250351	1.59297	0.111168	0.82715
NT5E	ENSG00000135318.12	protein_coding	12578.5	-0.368572	0.231464	-1.59235	0.111305	0.82715
ADH5	ENSG00000197894.12	protein_coding	8867.21	-0.108661	0.0682394	-1.59235	0.111307	0.82715
MORC4	ENSG00000133131.15	protein_coding	2375.4	0.10762	0.0676241	1.59144	0.11151	0.82715
OXER1	ENSG00000162881.7	protein_coding	12.1059	-0.898796	0.564861	-1.59118	0.111569	0.82715
PRAF2	ENSG00000243279.4	protein_coding	1233.86	0.107479	0.0675543	1.59101	0.111608	0.82715
CEP44	ENSG00000164118.13	protein_coding	695.973	-0.233345	0.14668	-1.59085	0.111644	0.82715
EIF1AY	ENSG00000198692.10	protein_coding	318.457	-0.274744	0.172761	-1.59031	0.111764	0.82715
SIN3B	ENSG00000127511.10	protein_coding	3469.24	0.0992735	0.0624317	1.59011	0.111809	0.82715
TEAD4	ENSG00000197905.10	protein_coding	1442.95	-0.110299	0.0693716	-1.58998	0.11184	0.82715
SPIN4	ENSG00000186767.7	protein_coding	880.712	-0.247606	0.155771	-1.58955	0.111935	0.82715
LATS1	ENSG00000131023.13	protein_coding	4492.45	-0.0866669	0.0545252	-1.58949	0.111951	0.82715
CDS2	ENSG00000101290.14	protein_coding	4560.72	0.108553	0.0682991	1.58938	0.111975	0.82715
GPR137B	ENSG00000077585.14	protein_coding	741.556	0.145991	0.0918629	1.58923	0.112009	0.82715
SLC1A1	ENSG00000106688.12	protein_coding	721.213	0.466129	0.293321	1.58914	0.112028	0.82715
GABARAPL1	ENSG00000139112.11	protein_coding	2328.81	0.432555	0.272261	1.58875	0.112116	0.82715
ZNG1B	ENSG00000136682.16	protein_coding	300.153	0.134628	0.0847401	1.58872	0.112124	0.82715
ISL2	ENSG00000159556.10	protein_coding	13.118	1.46552	0.922485	1.58867	0.112135	0.82715
FBXO30	ENSG00000118496.5	protein_coding	3751.04	-0.0966999	0.060869	-1.58866	0.112138	0.82715
BUB1B	ENSG00000156970.13	protein_coding	1929.17	-0.360658	0.227033	-1.58858	0.112156	0.82715
CTAGE1	ENSG00000212710.5	protein_coding	19.2139	-0.744077	0.468667	-1.58764	0.112367	0.82715
GGT5	ENSG00000099998.19	protein_coding	36.8024	1.00888	0.635465	1.58763	0.11237	0.82715
BUB1	ENSG00000169679.15	protein_coding	3285.93	-0.312851	0.197107	-1.58721	0.112464	0.82715
DKK3	ENSG00000050165.19	protein_coding	19107.1	0.32997	0.207907	1.5871	0.11249	0.82715
SHMT1	ENSG00000176974.22	protein_coding	736.619	-0.271703	0.17121	-1.58696	0.112522	0.82715
ENSG00000286001	ENSG00000286001.1	protein_coding	65.1693	-0.383017	0.241452	-1.5863	0.11267	0.82715
MRPL38	ENSG00000204316.13	protein_coding	1826.84	-0.0682266	0.04301	-1.5863	0.112672	0.82715
BAG1	ENSG00000107262.26	protein_coding	1017.06	0.0805568	0.0507872	1.58616	0.112702	0.82715
BST1	ENSG00000109743.11	protein_coding	711.537	0.36469	0.22995	1.58595	0.112751	0.82715
REEP3	ENSG00000165476.14	protein_coding	9354	0.108821	0.0686159	1.58594	0.112753	0.82715
PRDX5	ENSG00000126432.14	protein_coding	5163.3	0.0875017	0.0551747	1.5859	0.112761	0.82715
CLIP1	ENSG00000130779.22	protein_coding	6069.62	0.147667	0.0931329	1.58555	0.112842	0.82715
WIZ	ENSG00000011451.21	protein_coding	5843.94	0.0833246	0.0525536	1.58552	0.112849	0.82715
DST	ENSG00000151914.22	protein_coding	31856.2	0.148877	0.0939338	1.58491	0.112986	0.82715
SLC2A11	ENSG00000133460.20	protein_coding	156.202	0.223534	0.141085	1.5844	0.113104	0.82715
EMP1	ENSG00000134531.10	protein_coding	26612.4	-0.121736	0.0768394	-1.58429	0.113127	0.82715
ZNF610	ENSG00000167554.15	protein_coding	71.4817	0.480794	0.303542	1.58394	0.113207	0.82715
TMSB15B	ENSG00000158427.15	protein_coding	21.6115	-0.619789	0.391355	-1.5837	0.113262	0.82715
ATOX1	ENSG00000177556.12	protein_coding	1306.31	0.111393	0.0703914	1.58247	0.113541	0.82715
KIF23	ENSG00000137807.16	protein_coding	4688.32	-0.308667	0.195097	-1.58212	0.113621	0.82715
AP1S3	ENSG00000152056.18	protein_coding	405.341	0.366752	0.231865	1.58175	0.113707	0.82715
PDCD5	ENSG00000105185.12	protein_coding	785.572	0.134583	0.0851018	1.58144	0.113778	0.82715
PGM1	ENSG00000079739.17	protein_coding	4865.45	0.171898	0.108718	1.58113	0.113849	0.82715
BYSL	ENSG00000112578.11	protein_coding	1267.04	-0.104897	0.0663441	-1.5811	0.113854	0.82715
TICAM1	ENSG00000127666.11	protein_coding	1608.91	-0.122598	0.0775616	-1.58065	0.113957	0.82715
LRRC4	ENSG00000128594.8	protein_coding	95.158	0.49002	0.310047	1.58047	0.114	0.82715
PXDC1	ENSG00000168994.14	protein_coding	9381.84	0.287955	0.182216	1.58029	0.114041	0.82715
COL5A3	ENSG00000080573.7	protein_coding	3928.44	-0.397199	0.251504	-1.5793	0.114268	0.82715
BPGM	ENSG00000172331.12	protein_coding	3720.94	0.196872	0.124686	1.57894	0.114351	0.82715
GBP4	ENSG00000162654.9	protein_coding	327.762	0.5025	0.318355	1.57842	0.114468	0.82715
ICE2	ENSG00000128915.12	protein_coding	2268.26	-0.125454	0.0794882	-1.57827	0.114504	0.82715
LRRK1	ENSG00000154237.13	protein_coding	2369.62	-0.128204	0.0812326	-1.57823	0.114512	0.82715
SLC38A2	ENSG00000134294.14	protein_coding	101590	-0.146546	0.0928737	-1.5779	0.114588	0.82715
HHIPL2	ENSG00000143512.13	protein_coding	8.93789	-0.756486	0.479427	-1.57789	0.11459	0.82715
C17orf58	ENSG00000186665.10	protein_coding	251.084	-0.193593	0.122693	-1.57787	0.114596	0.82715
EIF2S1	ENSG00000134001.15	protein_coding	8207.72	-0.0999948	0.0633818	-1.57766	0.114644	0.82715
NDUFB4	ENSG00000065518.8	protein_coding	2305.46	0.0707999	0.0448796	1.57755	0.114668	0.82715
PRSS27	ENSG00000172382.10	protein_coding	20.6267	0.490668	0.311099	1.57721	0.114747	0.82715
EEFSEC	ENSG00000132394.11	protein_coding	925.1	-0.114464	0.0725746	-1.5772	0.11475	0.82715
CASQ1	ENSG00000143318.13	protein_coding	5.55371	-0.816717	0.517889	-1.57701	0.114793	0.82715
ADI1	ENSG00000182551.14	protein_coding	5498.28	0.106146	0.0673154	1.57685	0.11483	0.82715
COL6A3	ENSG00000163359.17	protein_coding	177510	-0.218373	0.138503	-1.57666	0.114874	0.82715
TMEFF1	ENSG00000241697.5	protein_coding	8.98075	-0.818564	0.519307	-1.57626	0.114965	0.82715
NSMCE2	ENSG00000156831.9	protein_coding	712.093	-0.139637	0.08859	-1.57622	0.114976	0.82715
PANO1	ENSG00000288675.1	protein_coding	136.325	0.260563	0.165321	1.5761	0.115003	0.82715
MEGF10	ENSG00000145794.17	protein_coding	23.8477	-0.782237	0.496326	-1.57605	0.115013	0.82715
MED8	ENSG00000159479.17	protein_coding	2258.49	0.0644949	0.040925	1.57593	0.115042	0.82715
MIX23	ENSG00000160124.9	protein_coding	308.003	-0.140026	0.0888529	-1.57593	0.115043	0.82715
OIP5	ENSG00000104147.9	protein_coding	345.209	-0.33687	0.213769	-1.57586	0.115058	0.82715
GSTZ1	ENSG00000100577.19	protein_coding	636.895	0.141496	0.0897898	1.57586	0.115059	0.82715
DYNC1I1	ENSG00000158560.14	protein_coding	32.0494	0.899894	0.57111	1.57569	0.115097	0.82715
NUP205	ENSG00000155561.15	protein_coding	5356.69	-0.182291	0.115759	-1.57475	0.115314	0.82792
TMEM129	ENSG00000168936.12	protein_coding	2059.56	0.111535	0.0708511	1.57422	0.115436	0.82792
EGF	ENSG00000138798.13	protein_coding	90.9153	0.729191	0.463334	1.57379	0.115536	0.82792
H1-0	ENSG00000189060.6	protein_coding	6474.8	-0.16036	0.101901	-1.57369	0.115558	0.82792
TXK	ENSG00000074966.12	protein_coding	3.80263	1.16106	0.738151	1.57293	0.115735	0.82792
ALX1	ENSG00000180318.4	protein_coding	153.217	0.893435	0.568124	1.57261	0.11581	0.82792
BTF3L4	ENSG00000134717.18	protein_coding	4103.27	-0.108327	0.0689038	-1.57216	0.115914	0.82792
GPR89A	ENSG00000117262.19	protein_coding	255.029	-0.136725	0.0869672	-1.57214	0.115918	0.82792
STRIP1	ENSG00000143093.15	protein_coding	2518.54	0.0755653	0.0480739	1.57186	0.115984	0.82792
LMCD1	ENSG00000071282.12	protein_coding	1452.18	0.419055	0.266666	1.57146	0.116076	0.82792
NUP37	ENSG00000075188.9	protein_coding	1197.87	-0.140845	0.0896323	-1.57137	0.116098	0.82792
ZBTB4	ENSG00000174282.12	protein_coding	10981	0.0904239	0.0575453	1.57135	0.116101	0.82792
MSS51	ENSG00000166343.10	protein_coding	30.3182	0.316908	0.201679	1.57135	0.116101	0.82792
SMC4	ENSG00000113810.16	protein_coding	8679.43	-0.252146	0.160494	-1.57106	0.116169	0.82792
C16orf74	ENSG00000154102.11	protein_coding	44.2444	-0.652349	0.415325	-1.5707	0.116253	0.82792
ARHGAP11A	ENSG00000198826.11	protein_coding	3053.09	-0.309752	0.197229	-1.57052	0.116294	0.82792
RGMA	ENSG00000182175.15	protein_coding	92.5252	-0.949527	0.604843	-1.56987	0.116445	0.82792
RACGAP1	ENSG00000161800.13	protein_coding	6119.79	-0.291232	0.185535	-1.56968	0.116488	0.82792
IL1RAPL2	ENSG00000189108.14	protein_coding	22.1364	0.646643	0.412012	1.56947	0.116537	0.82792
ATP5F1A	ENSG00000152234.16	protein_coding	21621.3	0.0752998	0.0479865	1.56919	0.116604	0.82792
GATD3	ENSG00000160221.18	protein_coding	144.402	0.979136	0.623985	1.56917	0.116609	0.82792
KIF2A	ENSG00000068796.19	protein_coding	4416.21	-0.101501	0.0646937	-1.56895	0.116659	0.82792
RMI1	ENSG00000178966.17	protein_coding	1002.09	-0.231313	0.14745	-1.56876	0.116703	0.82792
CHEK1	ENSG00000149554.15	protein_coding	1999.45	-0.17215	0.109755	-1.56849	0.116767	0.82792
RPRD1A	ENSG00000141425.18	protein_coding	3501.75	-0.0920095	0.0586631	-1.56844	0.116778	0.82792
ATF5	ENSG00000169136.13	protein_coding	2072.24	0.180173	0.114877	1.5684	0.116787	0.82792
PERP	ENSG00000112378.12	protein_coding	6472.22	0.167596	0.106969	1.56677	0.117169	0.829944
RNF138	ENSG00000134758.14	protein_coding	1263.34	-0.121597	0.0776157	-1.56666	0.117194	0.829944
NCKAP5	ENSG00000176771.18	protein_coding	58.995	-0.529532	0.338141	-1.56601	0.117347	0.830589
IGSF23	ENSG00000216588.9	protein_coding	29.3321	0.728875	0.465546	1.56564	0.117434	0.830773
GPRIN1	ENSG00000169258.7	protein_coding	808.275	-0.336586	0.215253	-1.56368	0.117893	0.832466
HNRNPF	ENSG00000169813.17	protein_coding	11228.7	-0.0932077	0.0596114	-1.56359	0.117914	0.832466
SRP9	ENSG00000143742.14	protein_coding	7971.28	-0.0982656	0.0628526	-1.56343	0.117952	0.832466
ZNF184	ENSG00000096654.16	protein_coding	306.883	-0.1287	0.0823327	-1.56317	0.118012	0.832466
FBRSL1	ENSG00000112787.14	protein_coding	2404.91	-0.0675259	0.0431987	-1.56315	0.118018	0.832466
MMACHC	ENSG00000132763.15	protein_coding	742.604	-0.181743	0.116332	-1.56228	0.118221	0.832466
MRPS22	ENSG00000175110.14	protein_coding	1741.18	-0.0902646	0.0577854	-1.56207	0.118273	0.832466
KIF11	ENSG00000138160.7	protein_coding	5331.56	-0.314969	0.201659	-1.56189	0.118314	0.832466
LSM5	ENSG00000106355.10	protein_coding	944.347	-0.169583	0.108627	-1.56115	0.118488	0.832466
TLE4	ENSG00000106829.21	protein_coding	6276.51	0.212633	0.136212	1.56104	0.118513	0.832466
MYLIP	ENSG00000007944.16	protein_coding	481.02	-0.229415	0.146992	-1.56073	0.118586	0.832466
ARK2N	ENSG00000152242.11	protein_coding	5688.33	0.127115	0.0814616	1.56043	0.118657	0.832466
PRPF38A	ENSG00000134748.13	protein_coding	1248.26	-0.112	0.0717784	-1.56036	0.118674	0.832466
ZNF227	ENSG00000131115.16	protein_coding	465.156	0.126232	0.0809007	1.56033	0.118681	0.832466
ST3GAL4	ENSG00000110080.20	protein_coding	1526.3	-0.151411	0.0971354	-1.55877	0.119051	0.832466
CKAP2L	ENSG00000169607.13	protein_coding	2322.39	-0.351155	0.225297	-1.55863	0.119083	0.832466
RELN	ENSG00000189056.15	protein_coding	762.631	0.917548	0.588706	1.55858	0.119095	0.832466
WWP1	ENSG00000123124.14	protein_coding	2033.83	-0.0848366	0.0544337	-1.55853	0.119107	0.832466
GUCD1	ENSG00000138867.17	protein_coding	5886	-0.0660871	0.0424111	-1.55825	0.119173	0.832466
NSMCE3	ENSG00000185115.6	protein_coding	1589.96	-0.105414	0.0676521	-1.55817	0.119192	0.832466
USP44	ENSG00000136014.12	protein_coding	12.3688	1.02542	0.658102	1.55815	0.119198	0.832466
REXO4	ENSG00000148300.12	protein_coding	941.705	-0.0729534	0.0468208	-1.55814	0.1192	0.832466
UBP1	ENSG00000153560.12	protein_coding	6897.77	-0.0407276	0.0261413	-1.55798	0.119238	0.832466
MAP2K6	ENSG00000108984.16	protein_coding	62.126	0.642183	0.412327	1.55746	0.119361	0.832466
LYSMD1	ENSG00000163155.12	protein_coding	344.242	0.161249	0.103537	1.55742	0.119372	0.832466
SCP2	ENSG00000116171.19	protein_coding	4809.85	0.107631	0.0691132	1.55731	0.119397	0.832466
PLEKHA8	ENSG00000106086.21	protein_coding	1382.96	0.106687	0.0685545	1.55624	0.119651	0.832466
OSTM1	ENSG00000081087.16	protein_coding	2056.77	0.156542	0.100606	1.556	0.119709	0.832466
VPS54	ENSG00000143952.20	protein_coding	1906.75	-0.0713192	0.0458401	-1.55583	0.11975	0.832466
ACTN1	ENSG00000072110.17	protein_coding	105141	0.13375	0.0859817	1.55557	0.119811	0.832466
HSPB6	ENSG00000004776.13	protein_coding	465.596	-0.644968	0.414721	-1.55519	0.119901	0.832466
RPL26	ENSG00000161970.15	protein_coding	425.088	0.138007	0.0887507	1.555	0.119946	0.832466
BUD23	ENSG00000071462.13	protein_coding	1587	0.0711531	0.045768	1.55465	0.12003	0.832466
WDR44	ENSG00000131725.14	protein_coding	1630.64	0.0811344	0.0521914	1.55455	0.120052	0.832466
ZNF710	ENSG00000140548.10	protein_coding	1195.77	-0.140978	0.0907362	-1.55371	0.120253	0.832466
ZFYVE27	ENSG00000155256.18	protein_coding	849.864	0.119349	0.076835	1.55331	0.120348	0.832466
MGAT4B	ENSG00000161013.17	protein_coding	6280.84	0.0895744	0.0576745	1.5531	0.120399	0.832466
ESCO2	ENSG00000171320.15	protein_coding	944.03	-0.367009	0.236308	-1.55309	0.120401	0.832466
ZNF599	ENSG00000153896.19	protein_coding	212.163	0.158592	0.102154	1.55248	0.120547	0.832466
ZNF134	ENSG00000213762.12	protein_coding	1341.95	0.0747194	0.0481436	1.55201	0.12066	0.832466
SH3BP1	ENSG00000100092.24	protein_coding	245.038	-0.245962	0.158522	-1.5516	0.120758	0.832466
PI16	ENSG00000164530.15	protein_coding	9.16616	1.26419	0.815281	1.55062	0.120993	0.832466
ZNF70	ENSG00000187792.5	protein_coding	954.854	0.121259	0.0782019	1.55059	0.121	0.832466
GGCX	ENSG00000115486.13	protein_coding	4322	0.1361	0.0877988	1.55014	0.121108	0.832466
PRMT6	ENSG00000198890.9	protein_coding	1369.16	-0.171255	0.110528	-1.54942	0.12128	0.832466
ZNF570	ENSG00000171827.11	protein_coding	466.97	0.151228	0.0976087	1.54933	0.121303	0.832466
ITGAE	ENSG00000083457.12	protein_coding	522.824	0.175071	0.113006	1.54921	0.121331	0.832466
VPS36	ENSG00000136100.14	protein_coding	1648.83	-0.115963	0.0748733	-1.54878	0.121434	0.832466
CASKIN1	ENSG00000167971.16	protein_coding	38.8384	0.410844	0.265287	1.54868	0.121459	0.832466
NUP88	ENSG00000108559.13	protein_coding	2528.79	-0.151494	0.0978346	-1.54847	0.12151	0.832466
EBF3	ENSG00000108001.16	protein_coding	385.455	-0.626059	0.404394	-1.54814	0.121589	0.832466
ARHGEF39	ENSG00000137135.18	protein_coding	172.718	-0.347886	0.224713	-1.54813	0.12159	0.832466
KIF4A	ENSG00000090889.12	protein_coding	2665.97	-0.294692	0.190459	-1.54727	0.121798	0.832466
RPP30	ENSG00000148688.14	protein_coding	1122.42	-0.147607	0.0954203	-1.54692	0.121883	0.832466
LMNTD1	ENSG00000152936.11	protein_coding	30.5076	0.557505	0.36042	1.54682	0.121907	0.832466
RBL1	ENSG00000080839.12	protein_coding	1114.6	-0.333418	0.215632	-1.54624	0.122047	0.832466
PRAG1	ENSG00000275342.6	protein_coding	519.847	0.525397	0.339823	1.54609	0.122083	0.832466
NEK1	ENSG00000137601.18	protein_coding	1507.75	-0.117077	0.0757366	-1.54584	0.122143	0.832466
YIPF1	ENSG00000058799.15	protein_coding	929.8	-0.0797936	0.0516242	-1.54566	0.122186	0.832466
ENSG00000276418	ENSG00000276418.5	protein_coding	4.63032	-0.967161	0.625881	-1.54528	0.122279	0.832466
NOTCH4	ENSG00000204301.6	protein_coding	18.0397	-0.428216	0.277122	-1.54522	0.122292	0.832466
DNMT1	ENSG00000130816.17	protein_coding	7363.7	-0.189783	0.122829	-1.5451	0.122321	0.832466
MAN1A1	ENSG00000111885.7	protein_coding	1432.21	-0.335975	0.217496	-1.54474	0.122409	0.832466
TTI1	ENSG00000101407.13	protein_coding	1278.36	-0.168152	0.108863	-1.54462	0.122438	0.832466
MRPL3	ENSG00000114686.9	protein_coding	4381.74	-0.0907044	0.0587281	-1.54448	0.122472	0.832466
CTXN1	ENSG00000178531.6	protein_coding	486.662	0.239943	0.155358	1.54445	0.122478	0.832466
TGIF1	ENSG00000177426.22	protein_coding	1989.77	-0.224019	0.145063	-1.54428	0.12252	0.832466
SRSF3	ENSG00000112081.18	protein_coding	10119.6	-0.127306	0.0824647	-1.54376	0.122645	0.832466
KAT7	ENSG00000136504.15	protein_coding	3695.55	-0.0942917	0.0610979	-1.54329	0.122761	0.832466
KIF26B	ENSG00000162849.16	protein_coding	2091.31	-0.377985	0.244926	-1.54326	0.122768	0.832466
ZDHHC8	ENSG00000099904.16	protein_coding	3954.67	0.119378	0.0773595	1.54316	0.122792	0.832466
ZC3HC1	ENSG00000091732.18	protein_coding	1029.76	-0.0746895	0.0484021	-1.5431	0.122806	0.832466
FSCN1	ENSG00000075618.18	protein_coding	27211	0.126462	0.0819725	1.54274	0.122894	0.832466
DCK	ENSG00000156136.10	protein_coding	1597.49	-0.287008	0.186113	-1.54212	0.123045	0.832466
AP5Z1	ENSG00000242802.9	protein_coding	2035.28	0.117274	0.0760535	1.54199	0.123076	0.832466
TPX2	ENSG00000088325.16	protein_coding	10301.9	-0.283874	0.18411	-1.54187	0.123106	0.832466
[truncated: 11,642 more rows]
