# Supplementary material
Source: Research Square preprint supplement (doi:10.21203/rs.3.rs-9956001/v1)
Supplement: Supplementary file 8 [file b19cfc33ef05fdf36afdc5ec.xlsx]

## Sheet: S1 - Column Description
Supplementary Table S1: Column Description
Column Name	Description
Participant_ID	Unique anonymised identifier for each participant.
Condition	Diagnostic group, schizophrenia (SCZ) or control.
Sex	Biological sex of the participant.
Recruitment_Age (years)	Age at study enrolment.
Onset_Age (years)	Age when first clinical symptoms appeared.
Medication (mg)	Current daily antipsychotic medication and dose (mg).
CPZeq	Chlorpromazine-equivalent daily dose
Positive_Symptoms_Score	PANSS Positive Symptom subscale score.
Negative_Symptoms_Score	PANSS Negative Symptom subscale score.
IQ	General cognitive ability measured by a standardised IQ test.

## Sheet: S1 - Participant Metadata
Supplementary Table S1: Participant Metadata
Participant_ID	Condition	Sex	Recruitment_Age	Onset_Age	Medication (mg)	CPZeq	Positive_Symptoms_Score	Negative_Symptoms_Score	IQ
CN_010	Control	F	17.81	NA	NA	NA	7	7	121
CN_011	Control	M	17.98	NA	NA	NA	7	7	112
CN_012	Control	F	17.1	NA	NA	NA	7	7	122
CN_013	Control	M	12.83	NA	NA	NA	7	7	125
CN_014	Control	M	14.86	NA	NA	NA	7	7	122
CN_016	Control	F	14.42	NA	NA	NA	7	7	117
CN_021	Control	F	14.75	NA	NA	NA	7	7	NA
CN_022	Control	F	14.5	NA	NA	NA	7	7	NA
CN_023	Control	F	12.5	NA	NA	NA	7	7	121
SCZ_001	SCZ	M	18.98	15.5	Clozapine 350	275	19	20	84
SCZ_002	SCZ	M	17.09	16.5	Clozapine 300	236	19	14	98
SCZ_003	SCZ	F	18.35	16.9	Clozapine 300	236	16	17	87
SCZ_004	SCZ	F	17.97	16.5	Clozapine 350, Aripiprazole 200	840	23	18	77
SCZ_005	SCZ	F	17.31	16.5	Risperidone 2, Fluoexetine 20	194	20	9	100
SCZ_006	SCZ	F	15.56	15	Risperidone 50	200	23	11	101
SCZ_007	SCZ	F	15.39	14.5	Clozapine 150, Olanzapine 5	291	23	13	85
SCZ_009	SCZ	F	17.28	16	Aripiprazole 15, Sertraline 150	416	23	11	94
SCZ_015	SCZ	M	14.87	13.3	Aripiprazole 5 Aripiprazole 700	475	10	16	75
SCZ_018	SCZ	F	16.92	16.02	Clozapine 400, Sertraline 150	313	21	11	106
SCZ_019	SCZ	M	17.76	16.6	Clozapine 300	236	21	14	100
SCZ_020	SCZ	M	16.59	9	Clozapine 450, Aripiprazole 10, Escitalopram 10	356	15	15	67
