# Supplementary material
Source: Research Square preprint supplement (doi:10.21203/rs.3.rs-9956001/v1)
Supplement: Supplementary file 9 [file b2b3aae34b327e8de07d53d7.xlsx]

## Sheet: S8 - Column Description
Supplementary Table S8: Column Description
Column Name	Description
Probe_ID	Identifier of the Illumina Infinium (EPICv2) methylation probe used in LDA analysis
Gene_Name	Gene symbol taken from Gencode version 47 gene annotation corresponding to the gene expression feature included in the LDA analysis.
P_value	P-value from the two-sample t-test comparing discriminant scores when LDA was performed using residualised gene expression and methylation values after adjusting for covariates (age and sex)
FDR	Benjamini–Hochberg adjustment to P_value column.
Expression_Loading	Linear discriminant loading coefficient representing the contribution of gene expression to sample separation along the discriminant axis. Larger absolute values indicate greater contribution of gene expression to group discrimination.
Methylation_Loading	Linear discriminant loading coefficient representing the contribution of DNA methylation to sample separation along the discriminant axis. Larger absolute values indicate greater contribution of methylation to group discrimination.

## Sheet: S8 - LDA Results
Supplementary Table S8: Linear Discriminant Analysis (LDA) Results
Probe_ID	Gene_Name	P_value	FDR	Expression_Loading	Methylation_Loading
cg01460604_TC21	LRRC17	0.000158487	0.00250021	5.74598	6.15616
cg26940909_TC21	TRIM6	0.000178586	0.00250021	-6.81851	-24.2755
cg03545227_TC21	PTPRN	0.00201787	0.00466716	-2.11721	0.385665
cg06971096_BC21	PTPRN	0.0011884	0.00466716	-2.29818	-9.36244
cg25516529_BC21	PTPRN	0.00187437	0.00466716	-1.9264	6.81813
cg20671534_TC21	PTPRN	0.00195141	0.00466716	-2.09932	0.481795
cg03000006_TC11	MYRIP	0.00161067	0.00466716	6.55616	-28.7558
cg14281592_TC21	ANGPTL2	0.00110847	0.00466716	-4.45418	2.62026
cg05193613_BC21	ANGPTL2	0.000891184	0.00466716	-3.96828	3.97566
cg24049326_TC21	SIRT7	0.00198279	0.00466716	17.1943	19.0365
cg16293131_TC11	SIRT7	0.00192789	0.00466716	14.6189	-43.3499
cg08267319_TC21	SIRT7	0.0021669	0.00466716	15.2188	-1.39872
cg18965659_BC11	RAB40B	0.00176307	0.00466716	6.67177	-14.6056
cg25156951_TC21	MYRIP	0.00245164	0.00490328	7.67713	6.25516
cg20176194_TC21	PTPRN	0.00268207	0.00500653	-2.37991	-40.4791
cg07921818_TC21	RAB40B	0.00411307	0.00719787	6.49784	-27.0891
cg11365234_BC21	STEAP2	0.00543197	0.00894095	-3.45616	-1.7815
cg06978680_BC21	STEAP2	0.00574776	0.00894095	-3.4785	-1.9999
cg24286372_TC21	STEAP1	0.00648865	0.00956222	-2.73369	5.0738
cg12473734_BC11	RAB40B	0.00782357	0.010953	8.17496	2.78742
cg13074114_BC21	KLHL38	0.00921415	0.0122855	-6.04685	0.286437
cg12552165_BC21	LAMC2	0.122608	0.150537	-0.800933	-4.10763
cg02767663_BC21	LAMC2	0.123655	0.150537	-0.767521	-12.4263
cg07544232_TC21	LAMC2	0.149083	0.162191	-0.76499	-2.8603
cg23070711_TC11	LAMC2	0.149667	0.162191	-0.834035	-3.46837
cg23696949_TC21	LAMC2	0.150606	0.162191	-0.584685	3.30042
cg01949993_BC11	LAMC2	0.166143	0.166143	-0.668454	0.909374
cg00696930_BC21	LAMC2	0.165966	0.166143	-0.706102	-0.434408
