# Supplementary material
Source: Research Square preprint supplement (doi:10.21203/rs.3.rs-9956001/v1)
Supplement: Supplementary file 10 [file bdf7932c08596e1a86746cd5.xlsx]

## Sheet: S9 - Column Description
Supplementary Table S9: Column Description
Column Name	Description
Probe_ID	Illumina CpG probe identifier (EPICv2).
Gene_Name	Gene symbol (e.g. PTPRN) taken from Gencode version 47 gene annotation.
MANOVA_P_value	P-value from multivariate analysis of variance (MANOVA) testing whether the joint distribution of gene expression and DNA methylation differed between schizophrenia and control samples after adjustment for age and sex. Significance was assessed using Wilks’ lambda.
MANOVA_FDR	Benjamini–Hochberg false discovery rate (FDR) adjusted p-value for the MANOVA.
Model_Comparison_P_value	P-value from comparison of reduced and full MANOVA models testing whether inclusion of diagnosis significantly improved model fit beyond covariates alone.
Model_Comparison_FDR	Benjamini–Hochberg false discovery rate (FDR) adjusted p-value for the model comparison.

## Sheet: S9 - MANOVA Results
Supplementary Table S9: Multivariate Analysis of Variance (MANOVA) Analysis Results
Probe_ID	Gene_Name	MANOVA_P_value	MANOVA_FDR	Model_Comparison_P_value	Model_Comparison_FDR
cg26940909_TC21	TRIM6	1.55605e-05	0.000435694	2.8441e-05	0.000398174
cg01460604_TC21	LRRC17	6.35509e-05	0.000889712	2.26766e-05	0.000398174
cg24049326_TC21	SIRT7	0.00014915	0.00103462	0.00277564	0.00518119
cg16293131_TC11	SIRT7	0.000184754	0.00103462	0.00310432	0.00543256
cg08267319_TC21	SIRT7	0.000176889	0.00103462	0.00349358	0.00575413
cg03545227_TC21	PTPRN	0.000532548	0.0016518	0.000721039	0.00252364
cg20176194_TC21	PTPRN	0.000694461	0.0016518	0.000521089	0.00252364
cg06971096_BC21	PTPRN	0.000730445	0.0016518	0.000479386	0.00252364
cg25516529_BC21	PTPRN	0.000667245	0.0016518	0.000623789	0.00252364
cg20671534_TC21	PTPRN	0.000766908	0.0016518	0.000715719	0.00252364
cg03000006_TC11	MYRIP	0.000452321	0.0016518	0.00141145	0.00359278
cg18965659_BC11	RAB40B	0.00071457	0.0016518	0.000569781	0.00252364
cg07921818_TC21	RAB40B	0.000574917	0.0016518	0.000891271	0.00277284
cg24286372_TC21	STEAP1	0.00110052	0.00215363	0.00387286	0.00602445
cg05193613_BC21	ANGPTL2	0.00115373	0.00215363	0.00101926	0.00285394
cg25156951_TC21	MYRIP	0.00133681	0.00233942	0.00190437	0.00410172
cg12473734_BC11	RAB40B	0.00218357	0.00359647	0.00213048	0.00426096
cg11365234_BC21	STEAP2	0.00320215	0.00498113	0.00646859	0.00953266
cg06978680_BC21	STEAP2	0.00421646	0.00591809	0.00770974	0.0106389
cg13074114_BC21	KLHL38	0.00424036	0.00591809	0.00797918	0.0106389
cg14281592_TC21	ANGPTL2	0.00443857	0.00591809	0.00161879	0.00377719
cg23070711_TC11	LAMC2	0.0222956	0.0283762	0.25747	0.283326
cg00696930_BC21	LAMC2	0.0378176	0.0460389	0.283326	0.283326
cg02767663_BC21	LAMC2	0.0404897	0.047238	0.201853	0.256904
cg07544232_TC21	LAMC2	0.0464564	0.0477722	0.271683	0.283326
cg12552165_BC21	LAMC2	0.0434599	0.0477722	0.225696	0.27476
cg01949993_BC11	LAMC2	0.0455062	0.0477722	0.282543	0.283326
cg23696949_TC21	LAMC2	0.0477722	0.0477722	0.264641	0.283326
