# Supplementary material
Source: Research Square preprint supplement (doi:10.21203/rs.3.rs-9956001/v1)
Supplement: Supplementary file 11 [file dee6e20e607bedbc654cfa36.xlsx]

## Sheet: S5 Columns Description
Column Name	Description
Module	WGCNA co-expression module defined by hierarchical clustering and dynamic tree cutting; represents a cluster of genes with highly correlated expression profiles.
Term	Functional annotation term enriched in the module (GO/KEGG/Reactome/WikiPathways pathway or ontology label returned by Enrichr).
Overlap	Number of module genes overlapping with the annotation term, expressed as k / K, where k = overlapping module genes and K = total genes annotated to the term.
Odds_Ratio	Enrichment odds ratio computed by Enrichr, representing the strength of association between the module and the functional term relative to background expectation.
FDR	False discovery rate (FDR)-corrected P-value for the enrichment test in Enrichr, controlling for multiple hypothesis testing across all terms.
DEG_List	Differentially expressed genes with unadjusted p < 0.05 that overlap with the annotation term
Database	Functional annotation database used for enrichment (e.g. GO Biological Process).

## Sheet: S5 WGCNA Modules Functional
Supplementary Table S5: Functional Gene Annotation of SCZ-enriched WGCNA Modules
Module	Term	Overlap	Odds_Ratio	FDR	DEG_List	Database
Module 2	Transcription Corepressor Binding (GO:0001222)	3/46	39.7056	0.00562863	PER2;PER3;HDAC1	GO_Molecular_Function_2025
Module 2	Transcription Coregulator Binding (GO:0001221)	3/103	17.0246	0.0304308	PER2;PER3;HDAC1	GO_Molecular_Function_2025
Module 2	Nucleosomal DNA Binding (GO:0031492)	2/34	34.6007	0.0392205	HDAC1;H1-0	GO_Molecular_Function_2025
Module 2	Circadian entrainment	3/97	18.1167	0.0449921	PER2;PER3;GNB4	KEGG_2021_Human
Module 2	Circadian rhythm	2/31	38.1858	0.0449921	PER2;PER3	KEGG_2021_Human
Module 2	Circadian Rhythm Genes WP3594	4/201	11.8035	0.0475377	PER2;PER3;HDAC1;CIART	WikiPathways_2024_Human
Module 2	Transcription Cis-Regulatory Region Binding (GO:0000976)	5/548	5.41855	0.055899	PER2;PER3;ZBTB14;HDAC1;ARID5A	GO_Molecular_Function_2025
Module 2	Melatonin Metabolism And Effects WP3298	2/37	31.6302	0.0765095	PER2;PER3	WikiPathways_2024_Human
Module 2	Cholesterol Biosynthesis Pathway In Hepatocytes WP5329	2/43	26.9932	0.0765095	MYLIP;ELOVL3	WikiPathways_2024_Human
Module 2	Cholesterol Metab With Bloch And Kandutsch Russell Pathways WP4718	2/47	24.5889	0.0765095	MYLIP;ELOVL3	WikiPathways_2024_Human
Module 2	Heterochromatin Formation (GO:0031507)	3/73	24.3576	0.0813877	H2AZ2;HDAC1;H1-0	GO_Biological_Process_2025
Module 2	Entrainment of Circadian Clock by Photoperiod (GO:0043153)	2/21	58.3129	0.0813877	PER2;PER3	GO_Biological_Process_2025
Module 2	Photoperiodism (GO:0009648)	2/22	55.3944	0.0813877	PER2;PER3	GO_Biological_Process_2025
Module 2	Negative Regulation of Gene Expression, Epigenetic (GO:0045814)	3/110	15.9052	0.0851107	H2AZ2;HDAC1;H1-0	GO_Biological_Process_2025
Module 2	Regulation of Androgen Receptor Signaling Pathway (GO:0060765)	2/29	41.0185	0.0851107	HDAC1;TRIM68	GO_Biological_Process_2025
Module 2	Negative Regulation of RNA Biosynthetic Process (GO:1902679)	5/470	6.35288	0.0953531	PER2;ZBTB14;HDAC1;ARID5A;CIART	GO_Biological_Process_2025
Module 2	Alcoholism	3/186	9.26417	0.0998714	H2AZ2;HDAC1;GNB4	KEGG_2021_Human
Module 3	MAPK signaling pathway	13/294	3.16383	0.0447832	NTRK2;GADD45B;GADD45A;DUSP1;PLA2G4C;MAPK8IP2;GNG12;MAPK8IP3;PGF;NFKB1;CACNB1;MAPKAPK3;CACNG4	KEGG_2021_Human
Module 3	Herpes simplex virus 1 infection	18/498	2.58374	0.0447832	ZNF155;ZNF793;ZNF540;ZNF461;ZNF570;STAT1;BAD;IFNGR2;ZNF44;NFKB1;ZNF429;ZNF547;ZNF565;ZNF234;ZNF674;IRF9;TLR2;ZFP28	KEGG_2021_Human
Module 3	Nucleotide excision repair	5/47	8.01574	0.0447832	CDK7;CETN2;XPA;RAD23B;GTF2H5	KEGG_2021_Human
Module 3	Nucleotide Excision Repair In Xeroderma Pigmentosum WP5114	7/75	6.96983	0.0448514	CDK7;CETN2;XPA;RAD23B;H3-3A;GTF2H5;HMGN1	WikiPathways_2024_Human
Module 3	Immune Response To Tuberculosis WP4197	4/22	14.9298	0.0509435	STAT1;IFNGR2;PSMB8;IRF9	WikiPathways_2024_Human
Module 3	Nucleotide Excision Repair WP4753	5/44	8.63365	0.0567861	CDK7;CETN2;XPA;RAD23B;GTF2H5	WikiPathways_2024_Human
Module 3	JUN Kinase Binding (GO:0008432)	3/9	33.4983	0.0708457	GSTP1;MAPK8IP2;MAPK8IP3	GO_Molecular_Function_2025
Module 3	SNARE interactions in vesicular transport	4/33	9.26162	0.0725609	GOSR2;STX7;USE1;VAMP5	KEGG_2021_Human
Module 3	Primary bile acid biosynthesis	3/17	14.3506	0.0789622	SCP2;CYP46A1;SLC27A5	KEGG_2021_Human
Module 4	Inositol phosphate metabolism	16/73	3.95042	0.0061371	PI4K2B;MTMR1;TPI1;SACM1L;PIK3CB;MTMR4;INPP5A;PIK3CA;INPP5F;ITPKA;INPP5E;PIP4K2A;PIK3C3;PLCH1;PLCB2;PI4K2A	KEGG_2021_Human
Module 4	Phosphatidylinositol signaling system	18/97	3.20765	0.010245	PI4K2B;MTMR1;SACM1L;ITPR2;ITPR3;PIK3CB;MTMR4;DGKZ;INPP5A;INPP5F;PIK3CA;INPP5E;ITPKA;PIP4K2A;PIK3C3;IP6K1;PLCB2;PI4K2A	KEGG_2021_Human
Module 4	Endoplasmic Reticulum Membrane (GO:0005789)	89/872	1.62708	0.0137294	ERO1A;POMT2;ERO1B;PI4K2B;PIGU;PIGQ;CCDC47;CISD2;AREG;PIGV;LCLAT1;PIGX;ZFYVE27;SMPD4;RAC2;UBXN8;GET1;TMEM38B;WLS;STARD3;ALG8;DGAT2;CERS6;ALG9;DGAT1;MMGT1;SACM1L;PLAUR;PLA2G4A;CYBA;ELOVL7;ACSL3;RHOC;HLA-G;PLPP6;DPM2;TMX3;TMX2;NOS1AP;RFT1;TYRO3;MGLL;UBIAD1;ATL3;MYRF;SLC35D1;ZDHHC20;DERL3;DERL2;HTRA2;ITPR2;FITM2;ITPR3;DNAJC25;HACD3;PTGS2;CDC42;VTI1A;HAS2;GPAT3;CEPT1;KDSR;UBQLN4;LRRC8E;LNPK;CYB5B;SLC3…	GO_Cellular_Component_2025
Module 4	Miscellaneous Transport and Binding Events	9/26	7.4273	0.0213973	SLC66A1;NIPAL1;MMGT1;LRRC8C;NIPA1;LRRC8A;LRRC8B;NIPA2;LRRC8E	Reactome_Pathways_2024
Module 4	Metabolism	192/2181	1.40442	0.0213973	PI4K2B;PANK2;CERK;NUP188;CPNE7;XYLT1;RORA;MT-ND3;SAT1;LCLAT1;ABHD10;PNP;ENPP1;PIP4K2A;EPM2A;STARD3;DGAT2;ACOT7;CSNK2A1;DGAT1;ENTPD3;NUP210;ENTPD5;SACM1L;ENTPD6;ACOT11;ACSL3;SDHA;PGD;GCAT;SLC5A6;PLPP6;MTAP;MTHFD1;SCO1;GPD2;SHPK;NHLRC1;FAR2;PI4K2A;ABCG2;MTMR1;GCDH;UBIAD1;PSMD12;POM121;RTEL1;HS3ST3A1;PFKFB3;SLC35D1;PIK3R4;MTMR9;ITPR2;ITPR3;AK5;HACD3;AAAS;MTMR4;ADIPOR2;NEU3;CYP27B1;INPP5A;ARSL;INPP5F…	Reactome_Pathways_2024
Module 4	Synthesis of PIPs at the Early Endosome Membrane	7/16	10.9	0.0213973	PI4K2B;MTMR12;INPP5F;PIK3R4;PIK3C3;MTMR4;PI4K2A	Reactome_Pathways_2024
Module 4	Metabolism of Lipids	79/758	1.66186	0.0228315	PI4K2B;ALAS1;MTMR12;CERK;CPNE7;RORA;PIK3CB;LCLAT1;SMPD4;PIP4K2A;TNFAIP8L3;STARD3;ACOT7;DGAT2;CERS6;CSNK2A1;DGAT1;NCOA6;SACM1L;ACOT11;PLA2G4A;ELOVL7;ACSL3;MED26;MED23;MED22;PLPP6;BDH1;PIK3CA;PITPNM1;GPD2;AGPS;PIK3C3;FAR2;ANGPTL4;B4GALT6;PI4K2A;MGLL;ABCG2;MTMR1;PRKAA2;PIK3R4;MTMR9;FITM2;HACD3;MTMR4;PTGS2;CYP27B1;NEU3;ARSL;INPP5F;DHRS7B;TGS1;PMVK;INPP5E;ARSI;GPAT3;CEPT1;KDSR;ARSG;RPP14;ST3GAL3;CYB5B…	Reactome_Pathways_2024
Module 4	Phosphatidylinositol Biosynthetic Process (GO:0006661)	19/91	3.71925	0.0265889	PI4K2B;MTMR1;PIGU;PIGQ;SACM1L;PIK3CB;MTMR4;PIGV;EFR3B;DPM2;PIK3CA;PITPNM1;INPP5F;ITPKA;INPP5E;PIP4K2A;PIK3C3;IP6K1;PI4K2A	GO_Biological_Process_2025
Module 4	GnRH secretion	13/64	3.58036	0.0269385	HCN3;MAP2K1;TRPC4;ITPR2;ITPR3;PIK3CB;CACNA1H;PIK3CA;SPP1;MAPK1;KRAS;KCNN4;PLCB2	KEGG_2021_Human
Module 4	VEGF signaling pathway	12/59	3.58429	0.0300226	CDC42;MAP2K1;PPP3R1;PIK3CA;SH2D2A;RAC2;RAC3;PLA2G4A;MAPK1;KRAS;PIK3CB;PTGS2	KEGG_2021_Human
Module 4	Hippo signaling pathway	23/163	2.31399	0.0300226	FZD1;APC2;WNT10B;FZD5;FZD7;WNT7B;SERPINE1;FZD9;AFP;LIMD1;GDF5;AREG;NKD1;PPP2CA;PPP2CB;PAK1;DLG2;DVL1;ID1;BMPR1B;AMH;WNT3;YWHAH	KEGG_2021_Human
Module 4	mTOR signaling pathway	22/154	2.34676	0.0300226	FZD1;WNT10B;MAP2K1;PRKAA2;FZD5;CAB39;MAPKAP1;FZD7;WNT7B;FZD9;PIK3CB;WDR24;PIK3CA;DVL1;MAPK1;SLC38A9;RICTOR;KRAS;SGK1;FNIP1;ATP6V1C1;WNT3	KEGG_2021_Human
Module 4	Signaling by Receptor Tyrosine Kinases	59/536	1.75864	0.0306966	ALK;NRP2;SH3KBP1;ITGB3;PDE3B;PLAT;LAMC2;PIK3CB;ELK1;AREG;FGF5;LYL1;SPRED2;NELFB;DUSP4;MAP2K1;ATP6V0B;NCBP1;NRG1;CYBA;DUSP6;DNM1;ARC;PIK3CA;HGS;RASA1;ANOS1;PIK3C3;SGK1;CRK;CD274;RALA;LAMA1;MAPKAP1;SH2D2A;PIK3R4;ITPR2;ITPR3;CDC42;PPP2CA;PPP2CB;PAK1;SPP1;MAPK1;RICTOR;CSK;ATP6V0E2;POLR2J;WASF3;ATP6V1C1;COL24A1;WWP1;VEGFC;PTPN12;STAM;TEC;ID1;SPRY2;KRAS	Reactome_Pathways_2024
Module 4	Metabolism of Carbohydrates	37/290	2.06935	0.0306966	POM121;HS3ST3A1;PFKFB3;NUP188;XYLT1;AAAS;HS2ST1;PPP2CA;PPP2CB;CHSY1;B3GALT1;ST3GAL4;HAS2;PGM2;ST3GAL3;EPM2A;HS3ST3B1;CHST6;SLC37A2;TPI1;NUP210;PGAM1;AKR1A1;NUP153;B3GALT5;PGD;PGM2L1;PC;B4GAT1;SHPK;SDC1;CSPG5;NHLRC1;B4GALT6;B4GALT4;PFKP;GALK1	Reactome_Pathways_2024
Module 4	Signal Transduction	220/2613	1.33782	0.0306966	TFRC;HHIP;SERPINE1;GRPR;ELK1;HTR7;MYB;PIP4K2A;TRIM27;SOX7;WLS;SKP1;CSNK2A1;RUNX3;TAS2R19;SRRM1;ARC;ZW10;ANOS1;MTMR1;TMEM87A;MAPKAP1;SH2D2A;PIK3R4;LPAR3;AAAS;MTMR4;ABR;RHOT2;PPP3R1;PRKAR2B;ST3GAL4;RDH13;FADD;ATP6V1C1;ST3GAL3;FZD1;WNT10B;NMB;ICMT;COL24A1;FZD5;RCC2;FZD7;PDE2A;FZD9;STAM;VANGL1;ID1;CCDC88C;STRN;RGL2;RCOR1;GPR27;NRP2;AHCTF1;SH3KBP1;FAF2;AATF;AREG;DNER;RAC2;RAC3;NELFB;TIMP1;TMED5;DUSP4;…	Reactome_Pathways_2024
Module 4	Phospholipid Metabolism	29/211	2.24952	0.0358943	PI4K2B;MTMR1;MTMR12;CPNE7;PIK3R4;MTMR9;PIK3CB;MTMR4;LCLAT1;INPP5F;INPP5E;PIP4K2A;TNFAIP8L3;GPAT3;CEPT1;OSBPL8;DGAT2;CSNK2A1;DGAT1;AGK;SACM1L;PLA2G4A;MBOAT2;PITPNM1;PIK3CA;GPD2;PIK3C3;PI4K2A;MGLL	Reactome_Pathways_2024
Module 4	Biosynthesis of the N-glycan Precursor (Dolichol LLO) and Transfer to a Nascent Protein	15/79	3.29471	0.0373288	ALG8;ALG9;ST8SIA2;PMM2;SRD5A3;UAP1;DPM2;NEU3;AMDHD2;DOLPP1;GMPPA;RFT1;ST3GAL4;GFUS;ST3GAL3	Reactome_Pathways_2024
Module 4	RUNX3 Regulates Immune Response and Cell Migration	4/6	27.976	0.0436013	CBFB;ITGA4;SPP1;RUNX3	Reactome_Pathways_2024
Module 4	Phosphoinositides Metabolism WP4971	12/49	4.55546	0.0468993	MTMR1;MTMR12;PIK3CA;SACM1L;PIK3R4;PIP4K2A;MTMR9;PIK3C3;PLCH1;PIK3CB;MTMR4;PLCB2	WikiPathways_2024_Human
Module 4	Proteoglycans in cancer	26/205	2.04625	0.0540588	ITGB3;CAMK2A;ITPR2;ITPR3;PIK3CB;ELK1;CDC42;PAK1;CTSL;TIMP3;DROSHA;MAPK1;WNT3;FZD1;WNT10B;MAP2K1;FZD5;FZD7;WNT7B;FZD9;PLAUR;MSN;PIK3CA;SDC1;KRAS;ITGA5	KEGG_2021_Human
Module 4	Gene Expression (Transcription)	142/1615	1.3855	0.0561752	ZNF573;ZNF175;STEAP3;CCNT1;NUP188;SERPINE1;RORA;PHAX;IPO8;LSM11;HENMT1;MYB;PAPOLA;PIP4K2A;ZNF689;SNRPD3;ZNF721;ZNF443;SKP1;SUPT16H;DGAT2;CSNK2A1;NUP210;H2AC6;HUS1;DICER1;POLRMT;RUNX3;GEM;SRRM1;CCNE1;ZNF714;SRSF2;ZNF317;ZNF799;ZNF710;ANAPC1;FKBP5;ZNF792;CSF1R;PSMD12;POM121;L3MBTL2;RBM8A;CBFB;MAPKAP1;CSTF3;ZNF23;AAAS;SLC38A9;ZNF543;ZNF267;ZNF660;DR1;BRPF1;CBX5;BRPF3;ALYREF;INTS2;SETD1A;EAF2;TNFRSF1…	Reactome_Pathways_2024
Module 4	PI Metabolism	15/84	3.05514	0.0561752	PI4K2B;MTMR1;MTMR12;SACM1L;PIK3R4;MTMR9;PIK3CB;MTMR4;PIK3CA;INPP5F;INPP5E;PIP4K2A;TNFAIP8L3;PIK3C3;PI4K2A	Reactome_Pathways_2024
Module 4	Cushing syndrome	21/155	2.20474	0.0588345	FZD1;APC2;WNT10B;MAP2K1;FZD5;FZD7;WNT7B;CAMK2A;FZD9;ITPR2;ITPR3;ADCY1;CACNA1H;CCNE1;DVL1;ORAI1;MAPK1;E2F3;PDE8A;PLCB2;WNT3	KEGG_2021_Human
Module 4	Renin secretion	12/69	2.95388	0.0641715	PTGER4;PPP3R1;PTGER2;PDE3B;ADORA1;ORAI1;ITPR2;ITPR3;REN;ADRB2;PLCB2;CTSB	KEGG_2021_Human
Module 4	Glycerolipid metabolism	11/61	3.08564	0.0644848	DGAT2;PLPP4;DGAT1;AGK;LIPG;AKR1A1;MBOAT2;GPAT3;LCLAT1;DGKZ;MGLL	KEGG_2021_Human
Module 4	Purine metabolism	18/129	2.27899	0.0644848	CANT1;ENTPD3;ENTPD5;ENTPD6;PDE2A;PDE3B;NME2;NUDT2;AK5;ADCY1;NT5C;NUDT9;PNP;PDE4B;ENPP1;PGM2;PDE8A;XDH	KEGG_2021_Human
Module 4	Human papillomavirus infection	36/331	1.7215	0.0696266	PTGER4;LAMA1;ITGB3;LAMC2;PIK3CB;PTGS2;PPP2CA;CDC42;PPP2CB;DVL1;SPP1;MAPK1;FADD;ATP6V0E2;ATP6V1C1;WNT3;FZD1;APC2;WNT10B;ATP6V0B;MAP2K1;FZD5;ITGA4;FZD7;WNT7B;FZD9;TYK2;PPP2R3A;TICAM1;HLA-G;DLG2;PIK3CA;CCNE1;ITGA10;KRAS;ITGA5	KEGG_2021_Human
Module 4	MAPK Family Signaling Cascades	37/314	1.88759	0.0699527	PSMD12;CUL3;ITGB3;CAMK2A;PIK3CB;AREG;CDC14A;PPP2CA;FGF5;SPRED3;CDC42;PPP2CB;SPRED2;DNAJB1;PAK1;FNTB;MAPK1;CSK;RAG1;DUSP4;MAP2K1;ICMT;NRG1;TYK2;ETV4;SPTB;DUSP6;CNKSR2;DLG2;PSMC3;PIK3CA;RASA1;RASA2;IL2RB;KRAS;TEK;RGL2	Reactome_Pathways_2024
Module 4	Platelet Activation, Signaling and Aggregation	32/262	1.96359	0.0699527	SERPINA1;ITGB3;SERPINE1;ENDOD1;ITPR2;ABHD6;ITPR3;PIK3CB;CDC42;TBXA2R;GNG4;RAC2;TIMP3;PHACTR2;MAPK1;CSK;TIMP1;FCER1G;BRPF3;F2R;VEGFC;PLA2G4A;SYTL4;DGKZ;TUBA4A;TMX3;PIK3CA;TAGLN2;GNB5;CRK;MGLL;RAPGEF3	Reactome_Pathways_2024
Module 4	Metabolism of RNA	74/761	1.53178	0.0699527	LTV1;NUP188;RRP1;WDR4;RTCB;HNRNPR;PHAX;MT-ND3;SMG8;ALKBH8;EDC3;LSM11;PAPOLA;SNIP1;SNRPD3;SNRNP35;CTNNBL1;UTP15;PRMT5;NUP210;NCBP1;NSUN6;FTSJ1;SENP3;UTP18;GTPBP3;WDR33;SRRM1;LENG1;DUS2;SUPV3L1;QTRT2;SRSF2;SNRNP25;NSRP1;UTP25;POM121;PSMD12;RBM8A;CSTF3;SRRT;HEATR1;DDX23;ISG20L2;DDX20;CSTF2T;DDX21;AAAS;RNPC3;MRM1;MRM3;TBRG4;PPP2CA;TGS1;GAR1;IGF2BP3;LCMT2;UTP20;RPP14;POLR2J;DCPS;RNGTT;CCDC12;ALYREF;YJ…	Reactome_Pathways_2024
Module 4	Metabolism of Non-Coding RNA	11/54	3.5893	0.0699527	PRMT5;POM121;NUP188;NCBP1;NUP210;TGS1;DDX20;PHAX;NUP153;SNRPD3;AAAS	Reactome_Pathways_2024
Module 4	snRNP Assembly	11/54	3.5893	0.0699527	PRMT5;POM121;NUP188;NCBP1;NUP210;TGS1;DDX20;PHAX;NUP153;SNRPD3;AAAS	Reactome_Pathways_2024
Module 4	Signaling by VEGF	17/108	2.62627	0.0699527	NRP2;MAPKAP1;SH2D2A;ITGB3;ITPR2;VEGFC;CYBA;ITPR3;PIK3CB;CDC42;PAK1;PIK3CA;RASA1;RICTOR;KRAS;CRK;WASF3	Reactome_Pathways_2024
Module 4	Synthesis of PIPs at the Golgi Membrane	6/18	7.00075	0.0699527	PI4K2B;SACM1L;INPP5E;PIK3R4;PIK3C3;PI4K2A	Reactome_Pathways_2024
Module 4	Opioid Signalling	15/90	2.80983	0.0715498	CAMK2A;PLA2G4A;ITPR2;ITPR3;ADCY1;PPP2CA;PPP2CB;PPP3R1;GNG4;PRKAR2B;CAMK4;PDE4B;MAPK1;GNB5;PLCB2	Reactome_Pathways_2024
Module 4	Synthesis of Substrates in N-glycan Biosythesis	12/64	3.23877	0.075579	DPM2;NEU3;AMDHD2;ST8SIA2;DOLPP1;GMPPA;PMM2;SRD5A3;ST3GAL4;UAP1;GFUS;ST3GAL3	Reactome_Pathways_2024
Module 4	Mannose type O-glycan biosynthesis	6/23	4.94038	0.0768748	POMT2;B4GAT1;CHST10;LARGE1;FKTN;ST3GAL3	KEGG_2021_Human
Module 4	ERKs Are Inactivated	5/13	8.74625	0.0793282	DUSP4;PPP2CA;PPP2CB;MAPK1;DUSP6	Reactome_Pathways_2024
Module 4	Inactivation of CDC42 and RAC1	4/8	13.9865	0.0793282	CDC42;SRGAP3;SRGAP2;SRGAP1	Reactome_Pathways_2024
Module 4	N-glycan Antennae Elongation in the Medial trans-Golgi	7/26	5.16039	0.0851057	FUT8;MAN2A1;ST8SIA2;CHST10;ST3GAL4;B4GALT6;B4GALT4	Reactome_Pathways_2024
Module 4	Glucose Metabolism	14/85	2.76875	0.0944098	POM121;SLC37A2;TPI1;PFKFB3;NUP188;NUP210;PGAM1;NUP153;AAAS;PGM2L1;PPP2CA;PPP2CB;PC;PFKP	Reactome_Pathways_2024
Module 4	Regulation of Actin Cytoskeleton Organization (GO:0032956)	19/104	3.14822	0.09594	CSF1R;SIGLEC15;RALA;ARAP2;ARHGAP18;ARAP3;RHOC;CORO2B;RHOBTB2;CDC42;PEAK3;PIK3CA;SH3BP1;RAC2;XIRP2;RICTOR;CRK;RAPGEF3;CLASP2	GO_Biological_Process_2025
Module 4	Iron Uptake and Transport	11/59	3.21455	0.0975369	STEAP3;ATP6V0B;TFRC;TFR2;SLC11A2;FLVCR1;ATP6V0E2;MCOLN1;ATP6V1C1;SKP1;ABCG2	Reactome_Pathways_2024
Module 4	Signaling by NTRK1 (TRKA)	17/115	2.43776	0.0975369	DUSP4;MAP2K1;RALA;PIK3CB;ELK1;DNM1;DUSP6;PPP2CA;LYL1;PPP2CB;ARC;PIK3CA;ID1;MAPK1;KRAS;SGK1;CRK	Reactome_Pathways_2024
Module 4	Signaling by WNT	33/287	1.83264	0.0975369	PSMD12;CUL3;CAMK2A;ITPR2;ITPR3;PPP2CA;PPP2CB;PPP3R1;H3C15;GNG4;DVL1;RAC2;RAC3;SOX7;TMED5;WNT3;SKP1;WLS;FZD1;WNT10B;CSNK2A1;FZD5;H2AC6;FZD7;WNT7B;RUNX3;PYGO1;PSMC3;CCDC88C;KRAS;GNB5;PLCB2;LGR4	Reactome_Pathways_2024
Module 4	Long-term potentiation	11/67	2.75414	0.0993307	MAP2K1;PPP3R1;CAMK4;CAMK2A;ITPR2;MAPK1;ITPR3;KRAS;ADCY1;PLCB2;RAPGEF3	KEGG_2021_Human
Module 5	Cell Cycle	275/649	9.5978	2.28525e-126	RB1;NUP107;CCP110;SMC4;H2AC18;SMC2;CDC20;H2AC14;CDC23;KAT5;CHEK2;CHEK1;RCC1;FBXO5;H4C1;GTSE1;CDK5RAP2;TMPO;ESCO2;KNL1;NUP93;NUP98;DNA2;KIF20A;RHNO1;PIF1;NUP205;SEH1L;CDCA5;CDCA8;NCAPG;NCAPH;SKA1;SKA2;BRIP1;DSN1;NUP85;FIGNL1;RAD21;CEP72;NUP88;CEP192;ATRIP;CEP76;CEP78;BARD1;PLK4;CDT1;ACD;NCAPH2;PLK1;CDC7;CDC6;ZWINT;DHFR;POLA1;TPX2;POLA2;STAG1;STAG3;H2AC20;TOP2A;LIN54;FEN1;NCAPG2;BRCA1;BRCA2;TUBA1C;…	Reactome_Pathways_2024
Module 5	Cell Cycle, Mitotic	228/516	10.0404	2.01621e-108	RB1;NUP107;CCP110;SMC4;H2AC18;SMC2;CDC20;H2AC14;CDC23;RCC1;FBXO5;H4C1;GTSE1;CDK5RAP2;TMPO;ESCO2;KNL1;NUP93;NUP98;DNA2;KIF20A;NUP205;SEH1L;CDCA5;CDCA8;NCAPG;NCAPH;SKA1;SKA2;DSN1;NUP85;RAD21;CEP72;NUP88;CEP192;CEP76;CEP78;PLK4;CDT1;NCAPH2;PLK1;CDC7;CDC6;ZWINT;DHFR;POLA1;TPX2;POLA2;STAG1;H2AC20;TOP2A;LIN54;FEN1;NCAPG2;TUBA1C;XPO1;NUF2;CNTRL;TK1;JAK2;LIN52;NDC1;KIF23;TUBG1;KIF2A;INCENP;KIF2C;SFI1;PRI…	Reactome_Pathways_2024
Module 5	Cell Cycle Checkpoints	130/261	11.8778	3.37701e-68	ERCC6L;NUP107;MRE11;ZWILCH;BUB1B;CDC20;PPP1CC;CDC23;KAT5;CHEK2;CHEK1;KNTC1;H4C1;GTSE1;KNL1;CDC25C;CDC25A;SGO1;SGO2;CCNE2;ANAPC4;DNA2;NUP98;RHNO1;BLM;SEH1L;CDCA8;PKMYT1;PMF1;SKA1;NUP160;SKA2;ORC5;CCNB2;BRIP1;DSN1;CCNB1;ORC6;ORC1;NUP85;ORC3;ORC2;CLSPN;ATRIP;BARD1;UBE2C;PLK1;CDC7;CDC6;ZWINT;NDC80;KIF18A;UBE2S;CDK2;CDK1;RAD9B;RAD9A;MCM7;MCM8;MCM10;BRCA1;XPO1;H2BC26;EXO1;PPP2R5E;H2BC21;NUF2;SPDL1;TOPB…	Reactome_Pathways_2024
Module 5	M Phase	150/372	8.15399	1.8928e-63	RB1;ERCC6L;NUP107;ZWILCH;CCP110;BUB1B;SMC4;H2AC18;SMC2;CDC20;PPP1CC;CDC23;H2AC14;PTTG1;RCC1;KNTC1;NEK2;FBXO5;H4C1;KMT5A;CDK5RAP2;TMPO;CEP135;H2AC4;VRK1;KNL1;NUP93;SGO1;SGO2;ANAPC4;KIF20A;NUP98;NUP205;SEH1L;CDCA5;CDCA8;NCAPG;PMF1;NCAPH;SKA1;NUP160;SKA2;CCNB2;DSN1;CCNB1;NUP85;RAD21;CEP72;CEP192;NUP88;CEP76;CEP78;PLK4;UBE2I;NUP155;ODF2;UBE2C;NCAPH2;PLK1;ZWINT;NDC80;STAG1;KIF18A;UBE2S;H2AC20;CDK1;TUB…	Reactome_Pathways_2024
Module 5	Mitotic Prometaphase	100/203	11.4134	1.43095e-51	ERCC6L;NUP107;ZWILCH;CCP110;BUB1B;SMC4;SMC2;CDC20;PPP1CC;KNTC1;NEK2;CDK5RAP2;CEP135;KNL1;SGO1;SGO2;NUP98;SEH1L;CDCA5;CDCA8;NCAPG;PMF1;NCAPH;SKA1;NUP160;SKA2;CCNB2;DSN1;CCNB1;NUP85;RAD21;CEP72;CEP192;CEP76;CEP78;PLK4;ODF2;PLK1;ZWINT;NDC80;STAG1;KIF18A;CDK1;TUBGCP5;TUBGCP3;TUBA8;TUBA1C;XPO1;PPP2R5E;FIRRM;CNTRL;NUF2;SPDL1;HAUS3;HAUS6;PPP2R5D;HAUS5;TUBG1;CKAP5;HAUS2;HAUS1;KIF2A;INCENP;BIRC5;KIF2C;SFI…	Reactome_Pathways_2024
Module 5	Nucleus (GO:0005634)	666/4879	2.26622	3.42208e-48	RB1;RAMAC;ZNF296;POP7;ANKLE1;GPATCH1;ENO1;RBPJ;GABPB1;SMC4;FAM110A;H2AC11;CRHBP;H2AC12;H2AC14;CREB3L4;ALKBH1;ZNG1A;IER2;HES6;SAP30BP;WDR74;DDX10;MED9;WDR76;MED6;MED7;DDX39A;PRR19;SARNP;TCEANC2;SRFBP1;NUP98;PRR11;RHNO1;ASF1B;SLBP;PIF1;CDCA2;CDCA4;CDCA5;SHMT1;HSPA4L;CDCA7;NAIF1;NCAPG;WDR62;ZNF24;NTHL1;FIGNL1;RAD21;MCMBP;RDH14;ATRIP;KAT14;ZNF266;BARD1;PLK4;NCAPH2;PLK1;NFATC3;NR1D2;CDC7;NR1D1;CDC6;MA…	GO_Cellular_Component_2025
Module 5	DNA Repair	120/312	7.40698	8.17679e-48	DCLRE1B;DCLRE1A;MRE11;RIF1;H2AC18;H2AC14;KAT5;EME1;CHEK2;CHEK1;PCLAF;H4C1;KPNA2;GEN1;TIPIN;LIG1;H2AC4;MSH6;NEIL3;MSH2;FANCD2;TIMELESS;DNA2;RHNO1;BLM;PAXIP1;RAD51AP1;BRIP1;NTHL1;FIGNL1;CLSPN;ATRIP;BARD1;FANCI;ACD;UBE2I;XRCC4;FANCM;XRCC5;FANCL;XRCC2;XRCC3;FANCA;XRCC1;FANCC;FANCB;FANCE;PALB2;FANCG;PPP5C;H2AC20;TDP1;UBE2T;CDK2;RAD9B;RAD18;RAD9A;FEN1;BRCA1;BRCA2;PRPF19;H2BC26;EXO1;FIRRM;H2BC21;SUMO2;T…	Reactome_Pathways_2024
Module 5	Retinoblastoma Gene In Cancer WP2446	61/87	27.0184	2.1066e-43	TOP2A;RB1;MCM7;SUV39H1;FAF1;HMGB2;HMGB1;SMC2;STMN1;CHEK1;POLE;RFC5;RFC3;RFC4;DCK;CDC25A;CDC25B;SAP30;CCNA2;MSH6;TFDP1;CCNE2;MCM3;MCM4;MCM6;DNMT1;PCNA;PRIM1;TTK;TYMS;POLD3;NPAT;CCNB2;CCNB1;CDC45;ORC1;RBBP4;HLTF;E2F1;E2F2;RBBP7;H2AZ1;BARD1;PLK4;CDT1;RRM1;RRM2;RPA1;RPA2;CDC7;FANCG;MAPK13;DHFR;POLA1;ANLN;WEE1;KIF4A;RPA3;POLE2;CDK2;CDK1	WikiPathways_2024_Human
Module 5	DNA Double-Strand Break Repair	79/152	12.5728	8.17221e-43	FEN1;MRE11;RIF1;BRCA1;BRCA2;H2BC26;EME1;KAT5;EXO1;CHEK2;FIRRM;H2BC21;CHEK1;SUMO2;H4C1;TOPBP1;KPNA2;POLE;GEN1;RFC5;TIPIN;RFC3;RMI2;RFC4;PARP1;PARP2;RFC2;RMI1;TOP3A;BAZ1B;H2BC17;CCNA2;RAD51B;H2BC13;H2BC14;H2BC15;RAD51C;H2BC11;TIMELESS;DNA2;RHNO1;BLM;PAXIP1;PCNA;RNF8;RNF4;RAD51AP1;POLD3;BRIP1;FIGNL1;POLD1;NSD2;RBBP8;CLSPN;ATRIP;BARD1;H2BC9;POLQ;UBE2I;XRCC4;H2BC5;XRCC5;XRCC2;H2BC3;XRCC3;H2BC4;RPA1;XR…	Reactome_Pathways_2024
Module 5	Homology Directed Repair	70/122	15.5684	9.8927e-42	FEN1;MRE11;BRCA1;BRCA2;H2BC26;EME1;KAT5;EXO1;FIRRM;H2BC21;CHEK1;SUMO2;H4C1;TOPBP1;POLE;GEN1;RFC5;TIPIN;RFC3;RMI2;RFC4;PARP1;PARP2;RFC2;RMI1;TOP3A;H2BC17;CCNA2;RAD51B;H2BC13;H2BC14;H2BC15;RAD51C;H2BC11;TIMELESS;DNA2;RHNO1;BLM;PCNA;RNF8;RNF4;RAD51AP1;POLD3;BRIP1;FIGNL1;POLD1;NSD2;RBBP8;CLSPN;ATRIP;BARD1;H2BC9;POLQ;UBE2I;H2BC5;XRCC2;H2BC3;XRCC3;H2BC4;RPA1;XRCC1;RPA2;PALB2;RAD51;POLE2;RPA3;CDK2;POLE3…	Reactome_Pathways_2024
Module 5	Intracellular Membrane-Bounded Organelle (GO:0043231)	709/5597	2.07037	5.02515e-40	RB1;VPS29;RAMAC;ZNF296;SLC4A1AP;POP7;ANKLE1;GPATCH1;ENO1;RBPJ;GABPB1;SMC4;ABCA13;FAM110A;H2AC11;CRHBP;H2AC12;H2AC14;CREB3L4;ALKBH1;CSPP1;ZNG1A;IER2;HES6;SAP30BP;WDR74;DDX10;MED9;WDR76;MED6;MED7;DDX39A;PRR19;SARNP;TCEANC2;SRFBP1;PRR11;RHNO1;ASF1B;SLBP;PIF1;CDCA2;CDCA4;CDCA5;SHMT1;HSPA4L;CDCA7;NAIF1;NCAPG;SLCO5A1;WDR62;ZNF24;NCAPH;NTHL1;NUP85;FIGNL1;RAD21;MCMBP;RDH14;ATRIP;KAT14;ZNF266;BARD1;PLK4;A…	GO_Cellular_Component_2025
Module 5	Chromosome Maintenance	67/119	14.873	3.23489e-39	FEN1;DSCC1;HJURP;CHTF18;H2AC18;H2AC14;H2BC26;MIS18BP1;H2BC21;PPP6R3;OIP5;H4C1;RFC5;RFC3;RFC4;LIG1;RFC2;H2AC4;KNL1;H2BC17;CCNA2;H2BC13;H2BC14;H2BC15;H2BC11;DNA2;ITGB3BP;PIF1;PRIM2;BLM;PCNA;PRIM1;CENPA;CENPC;POLD3;RBBP4;POLR2B;POLD1;POLR2H;RBBP7;POLR2I;POLR2K;H2BC9;CENPU;ACD;CENPW;H2BC5;H2BC3;H2BC4;RPA1;RPA2;POLA1;POLA2;MIS18A;CENPH;CENPI;H2AC20;RPA3;CDK2;CENPK;CENPL;CENPM;CENPN;CENPO;CENPP;CENPQ;W…	Reactome_Pathways_2024
Module 5	DNA Metabolic Process (GO:0006259)	108/302	6.54556	3.60275e-38	DCLRE1B;ERCC6L;MRE11;TTF2;ZNF83;ALKBH1;CHEK1;PCLAF;SMARCAD1;KPNA2;NUDT15;GEN1;WDHD1;USP3;INIP;MSH6;NEIL3;MSH2;TIMELESS;DNA2;BLM;RNASEH2A;ORC5;RAD51AP1;BRIP1;ORC6;NTHL1;RAD21;ORC3;HLTF;ATRIP;BARD1;ACD;XRCC5;FANCL;XRCC2;XRCC3;FANCA;FANCC;CDC6;FANCG;FAM111B;ISG20;FAM111A;POLA1;POLA2;ARTN;TDP1;UBE2T;CDK2;CDK1;RAD9B;RAD18;RAD9A;TOP2A;FEN1;MCM7;MCM8;HMGB2;HMGB3;MCM10;BRCA1;HMGB1;EXO1;TOPBP1;POLE;RFC5;R…	GO_Biological_Process_2025
Module 5	HDR Through Homologous Recombination (HRR) or Single Strand Annealing (SSA)	65/116	14.6942	6.96264e-38	MRE11;BRCA1;BRCA2;H2BC26;EME1;KAT5;EXO1;FIRRM;H2BC21;CHEK1;SUMO2;H4C1;TOPBP1;POLE;GEN1;RFC5;TIPIN;RFC3;RMI2;RFC4;RFC2;RMI1;TOP3A;H2BC17;CCNA2;RAD51B;H2BC13;H2BC14;H2BC15;RAD51C;H2BC11;TIMELESS;DNA2;RHNO1;BLM;PCNA;RNF8;RNF4;RAD51AP1;POLD3;BRIP1;FIGNL1;POLD1;NSD2;RBBP8;CLSPN;ATRIP;BARD1;H2BC9;UBE2I;H2BC5;XRCC2;H2BC3;XRCC3;H2BC4;RPA1;RPA2;PALB2;RAD51;POLE2;RPA3;CDK2;POLE3;RAD9B;RAD9A	Reactome_Pathways_2024
Module 5	Resolution of Sister Chromatid Cohesion	67/126	13.1034	3.69832e-37	ERCC6L;NUP107;ZWILCH;BUB1B;CDC20;PPP1CC;TUBA1C;XPO1;PPP2R5E;FIRRM;NUF2;KNTC1;SPDL1;PPP2R5D;KNL1;CKAP5;SGO1;SGO2;KIF2A;INCENP;BIRC5;KIF2C;NUP98;ITGB3BP;SEH1L;CDCA5;MIS12;CDCA8;PMF1;CENPA;NUP160;SKA1;AURKB;SKA2;CENPC;CCNB2;CCNB1;DSN1;NUP85;RAD21;NUP43;BUB3;BUB1;CENPU;NDE1;PLK1;TUBB4B;NDC80;ZWINT;KIF18A;STAG1;CENPF;CENPH;CENPI;CENPK;CDK1;CENPL;CENPM;CENPN;CENPO;CENPP;CENPQ;SPC24;TUBA8;MAD2L1;NUP37;S…	Reactome_Pathways_2024
Module 5	DNA Repair (GO:0006281)	106/302	6.34987	7.55807e-37	DCLRE1B;DCLRE1A;ERCC6L;MRE11;NUCKS1;TTF2;KAT5;EME1;ZNF83;ALKBH1;CHEK2;CHEK1;WDHD1;ZGRF1;USP3;WRNIP1;INIP;TRAIP;MSH6;NEIL3;MSH2;FANCD2;TIMELESS;DNA2;RHNO1;BLM;RNASEH2A;CDCA5;RAD51AP1;BRIP1;NTHL1;RAD21;HLTF;ATRIP;BARD1;FANCI;XRCC4;FANCM;XRCC5;FANCL;XRCC2;PLK1;XRCC3;FANCA;XRCC1;FANCC;FANCB;FANCE;FANCG;FAM111A;POLA1;PPP5C;H2AC25;ARTN;TDP1;UBE2T;CDK1;HROB;RAD9B;RAD18;RAD9A;H2AX;FEN1;BRCA1;HMGB1;BRCA2;…	GO_Biological_Process_2025
Module 5	Amplification of Signal From Unattached Kinetochores via a MAD2 Inhibitory Signal	57/94	17.6858	7.45323e-36	ERCC6L;NUP107;ZWILCH;BUB1B;CDC20;PPP1CC;XPO1;PPP2R5E;NUF2;KNTC1;SPDL1;PPP2R5D;KNL1;CKAP5;SGO1;SGO2;KIF2A;INCENP;BIRC5;KIF2C;NUP98;ITGB3BP;SEH1L;MIS12;CDCA8;CENPA;PMF1;AURKB;NUP160;SKA1;CENPC;SKA2;DSN1;NUP85;NUP43;BUB3;BUB1;CENPU;NDE1;PLK1;NDC80;ZWINT;CENPF;KIF18A;CENPH;CENPI;CENPK;CENPL;CENPM;CENPN;CENPO;CENPP;CENPQ;SPC24;MAD2L1;NUP37;SPC25	Reactome_Pathways_2024
Module 5	Amplification of Signal From the Kinetochores	57/94	17.6858	7.45323e-36	ERCC6L;NUP107;ZWILCH;BUB1B;CDC20;PPP1CC;XPO1;PPP2R5E;NUF2;KNTC1;SPDL1;PPP2R5D;KNL1;CKAP5;SGO1;SGO2;KIF2A;INCENP;BIRC5;KIF2C;NUP98;ITGB3BP;SEH1L;MIS12;CDCA8;CENPA;PMF1;AURKB;NUP160;SKA1;CENPC;SKA2;DSN1;NUP85;NUP43;BUB3;BUB1;CENPU;NDE1;PLK1;NDC80;ZWINT;CENPF;KIF18A;CENPH;CENPI;CENPK;CENPL;CENPM;CENPN;CENPO;CENPP;CENPQ;SPC24;MAD2L1;NUP37;SPC25	Reactome_Pathways_2024
Module 5	Mitotic Metaphase and Anaphase	87/222	7.49985	2.43641e-35	ERCC6L;NUP107;ZWILCH;BUB1B;LMNB1;CDC20;TUBA1C;PPP1CC;CDC23;XPO1;PTTG1;PPP2R5E;NUF2;NUP62;RCC1;KNTC1;FBXO5;SPDL1;LBR;TMPO;NDC1;VRK1;PPP2R5D;KNL1;CKAP5;NUP93;SGO1;SGO2;KIF2A;ESPL1;INCENP;ANAPC4;BIRC5;KIF2C;NUP54;NUP98;ITGB3BP;NUP58;NUP205;SEH1L;CDCA5;MIS12;CDCA8;CENPA;PMF1;SKA1;NUP160;AURKB;SKA2;CENPC;CCNB2;DSN1;CCNB1;NUP85;RAD21;NUP43;BUB3;BUB1;CENPU;UBE2I;NUP155;UBE2C;NDE1;PLK1;TUBB4B;ZWINT;NDC80…	Reactome_Pathways_2024
Module 5	Mitotic Spindle Checkpoint	61/111	14.0312	5.3433e-35	ERCC6L;NUP107;ZWILCH;BUB1B;CDC20;PPP1CC;CDC23;XPO1;PPP2R5E;NUF2;KNTC1;SPDL1;PPP2R5D;KNL1;CKAP5;SGO1;SGO2;KIF2A;INCENP;ANAPC4;BIRC5;KIF2C;NUP98;ITGB3BP;SEH1L;MIS12;CDCA8;PMF1;CENPA;NUP160;SKA1;AURKB;SKA2;CENPC;DSN1;NUP85;NUP43;BUB3;BUB1;CENPU;UBE2C;NDE1;PLK1;NDC80;ZWINT;KIF18A;CENPF;CENPH;UBE2S;CENPI;CENPK;CENPL;CENPM;CENPN;CENPO;CENPP;CENPQ;SPC24;MAD2L1;NUP37;SPC25	Reactome_Pathways_2024
Module 5	Mitotic Anaphase	86/221	7.40891	1.05727e-34	ERCC6L;NUP107;ZWILCH;BUB1B;LMNB1;CDC20;TUBA1C;PPP1CC;CDC23;XPO1;PTTG1;PPP2R5E;NUF2;NUP62;RCC1;KNTC1;SPDL1;LBR;TMPO;NDC1;VRK1;PPP2R5D;KNL1;CKAP5;NUP93;SGO1;SGO2;KIF2A;ESPL1;INCENP;ANAPC4;BIRC5;KIF2C;NUP54;NUP98;ITGB3BP;NUP58;NUP205;SEH1L;CDCA5;MIS12;CDCA8;CENPA;PMF1;SKA1;NUP160;AURKB;SKA2;CENPC;CCNB2;DSN1;CCNB1;NUP85;RAD21;NUP43;BUB3;BUB1;CENPU;UBE2I;NUP155;UBE2C;NDE1;PLK1;TUBB4B;ZWINT;NDC80;STAG1…	Reactome_Pathways_2024
Module 5	G2 M Checkpoints	67/137	11.0376	2.38357e-34	MRE11;MCM7;MCM8;MCM10;BRCA1;H2BC26;KAT5;EXO1;CHEK2;H2BC21;CHEK1;H4C1;TOPBP1;GTSE1;RFC5;RFC3;RMI2;RFC4;RFC2;RMI1;TOP3A;CDC25C;H2BC17;CDC25A;H2BC13;H2BC14;DBF4;H2BC15;H2BC11;MCM3;MCM4;MCM5;DNA2;MCM6;RHNO1;MCM2;BLM;RNF8;PKMYT1;ORC5;CCNB2;BRIP1;CCNB1;ORC6;CDC45;ORC1;ORC3;ORC2;NSD2;RBBP8;CLSPN;ATRIP;BARD1;H2BC9;H2BC5;H2BC3;H2BC4;RPA1;RPA2;CDC7;CDC6;WEE1;RPA3;CDK2;CDK1;RAD9B;RAD9A	Reactome_Pathways_2024
Module 5	DNA Replication	67/143	10.1629	6.73437e-33	FEN1;MCM7;MCM8;GMNN;MCM10;H2AC18;CDC23;H2AC14;H2BC26;H2BC21;H4C1;POLE;RFC5;RFC3;RFC4;LIG1;RFC2;H2AC4;H2BC17;CCNA2;H2BC13;H2BC14;DBF4;H2BC15;CCNE2;H2BC11;MCM3;ANAPC4;MCM4;MCM5;DNA2;MCM6;MCM2;PRIM2;PCNA;PRIM1;ORC5;POLD3;FZR1;ORC6;CDC45;ORC1;ORC3;POLD1;ORC2;GINS1;H2BC9;CDT1;GINS2;H2BC5;UBE2C;GINS3;H2BC3;GINS4;H2BC4;RPA1;RPA2;CDC7;CDC6;POLA1;POLA2;UBE2S;H2AC20;POLE2;RPA3;CDK2;POLE3	Reactome_Pathways_2024
Module 5	EML4 and NUDC in Mitotic Spindle Formation	60/116	12.3107	1.62212e-32	ERCC6L;NUP107;ZWILCH;BUB1B;CDC20;PPP1CC;TUBA1C;XPO1;PPP2R5E;NUF2;KNTC1;SPDL1;PPP2R5D;KNL1;CKAP5;SGO1;SGO2;KIF2A;INCENP;BIRC5;KIF2C;NUP98;ITGB3BP;SEH1L;MIS12;CDCA8;PMF1;CENPA;NUP160;SKA1;AURKB;SKA2;CENPC;DSN1;NUP85;NUP43;BUB3;BUB1;CENPU;NDE1;PLK1;TUBB4B;NDC80;ZWINT;KIF18A;CENPF;CENPH;CENPI;CENPK;CENPL;CENPM;CENPN;CENPO;CENPP;CENPQ;SPC24;TUBA8;MAD2L1;NUP37;SPC25	Reactome_Pathways_2024
Module 5	DNA Replication WP466	35/42	56.713	3.78021e-29	PRIM2;PCNA;MCM7;PRIM1;GMNN;MCM10;ORC5;POLD3;ORC6;CDC45;ORC1;ORC3;POLD1;ORC2;POLE;RFC5;CDT1;RFC3;RFC4;RFC2;RPA1;RPA2;CDC7;CDC6;POLA1;POLA2;DBF4;POLE2;RPA3;CDK2;MCM3;MCM4;MCM5;MCM6;MCM2	WikiPathways_2024_Human
Module 5	RHO GTPases Activate Formins	62/139	9.25265	6.4764e-29	ERCC6L;NUP107;ZWILCH;BUB1B;CDC20;PPP1CC;TUBA1C;XPO1;PPP2R5E;NUF2;KNTC1;SPDL1;PPP2R5D;KNL1;CKAP5;SGO1;SGO2;KIF2A;INCENP;BIRC5;KIF2C;NUP98;ITGB3BP;SEH1L;MIS12;CDCA8;PMF1;CENPA;NUP160;SKA1;AURKB;SKA2;CENPC;DSN1;NUP85;NUP43;BUB3;BUB1;CENPU;NDE1;PLK1;TUBB4B;NDC80;ZWINT;DIAPH2;KIF18A;CENPF;DIAPH3;CENPH;CENPI;CENPK;CENPL;CENPM;CENPN;CENPO;CENPP;CENPQ;SPC24;TUBA8;MAD2L1;NUP37;SPC25	Reactome_Pathways_2024
Module 5	Processing of DNA Double-Strand Break Ends	47/80	16.2523	9.43302e-29	BLM;MRE11;RNF8;BRCA1;RNF4;BRIP1;H2BC26;KAT5;EXO1;H2BC21;CHEK1;SUMO2;NSD2;RBBP8;H4C1;TOPBP1;CLSPN;ATRIP;RFC5;BARD1;H2BC9;RFC3;RMI2;TIPIN;RFC4;UBE2I;H2BC5;RFC2;RMI1;H2BC3;TOP3A;H2BC4;RPA1;RPA2;H2BC17;CCNA2;H2BC13;H2BC14;H2BC15;RPA3;H2BC11;CDK2;TIMELESS;DNA2;RAD9B;RHNO1;RAD9A	Reactome_Pathways_2024
Module 5	S Phase	64/150	8.55814	1.58823e-28	RB1;LIN54;FEN1;MCM7;MCM8;GMNN;CKS1B;CDC23;POLE;LIN52;RFC5;RFC3;RFC4;LIG1;RFC2;ESCO2;CDC25A;CDC25B;CCNA2;TFDP1;CCNE2;MCM3;ANAPC4;MCM4;MCM5;DNA2;MCM6;MCM2;PRIM2;PCNA;CDCA5;PRIM1;LIN9;ORC5;POLD3;FZR1;ORC6;CDC45;ORC1;RBBP4;ORC3;RAD21;POLD1;ORC2;E2F1;E2F4;GINS1;CDT1;GINS2;UBE2C;GINS3;GINS4;RPA1;RPA2;CDC6;POLA1;POLA2;STAG1;WEE1;UBE2S;POLE2;RPA3;CDK2;POLE3	Reactome_Pathways_2024
Module 5	Activation of ATR in Response to Replication Stress	32/37	72.4662	2.86728e-28	MCM7;MCM8;MCM10;ORC5;CDC45;ORC6;ORC1;ORC3;CHEK1;ORC2;CLSPN;ATRIP;RFC5;RFC3;RFC4;RFC2;RPA1;RPA2;CDC7;CDC6;CDC25C;CDC25A;DBF4;RPA3;CDK2;MCM3;MCM4;MCM5;MCM6;RAD9B;MCM2;RAD9A	Reactome_Pathways_2024
Module 5	Activation of the Pre-Replicative Complex	30/33	113.101	6.147e-28	PRIM2;MCM7;MCM8;PRIM1;GMNN;MCM10;ORC5;CDC45;ORC6;ORC1;ORC3;ORC2;POLE;CDT1;RPA1;RPA2;CDC7;CDC6;POLA1;POLA2;DBF4;POLE2;RPA3;CDK2;POLE3;MCM3;MCM4;MCM5;MCM6;MCM2	Reactome_Pathways_2024
Module 5	Separation of Sister Chromatids	69/177	7.36155	6.20607e-28	ERCC6L;NUP107;ZWILCH;BUB1B;CDC20;PPP1CC;TUBA1C;CDC23;XPO1;PTTG1;PPP2R5E;NUF2;KNTC1;SPDL1;PPP2R5D;KNL1;CKAP5;SGO1;SGO2;ESPL1;KIF2A;INCENP;ANAPC4;BIRC5;KIF2C;NUP98;ITGB3BP;SEH1L;CDCA5;MIS12;CDCA8;PMF1;CENPA;NUP160;SKA1;AURKB;SKA2;CENPC;DSN1;NUP85;RAD21;NUP43;BUB3;BUB1;CENPU;UBE2C;NDE1;PLK1;TUBB4B;NDC80;ZWINT;KIF18A;STAG1;CENPF;CENPH;UBE2S;CENPI;CENPK;CENPL;CENPM;CENPN;CENPO;CENPP;CENPQ;SPC24;TUBA8;…	Reactome_Pathways_2024
Module 5	HDR Through Homologous Recombination (HRR)	43/69	18.8327	7.07946e-28	BLM;MRE11;PCNA;BRCA1;BRCA2;POLD3;RAD51AP1;BRIP1;EME1;KAT5;EXO1;FIRRM;FIGNL1;POLD1;CHEK1;RBBP8;TOPBP1;POLE;ATRIP;GEN1;RFC5;BARD1;RFC3;RMI2;RFC4;RFC2;RMI1;XRCC2;TOP3A;XRCC3;RPA1;RPA2;PALB2;RAD51B;RAD51C;RAD51;POLE2;RPA3;POLE3;DNA2;RAD9B;RHNO1;RAD9A	Reactome_Pathways_2024
Module 5	Diseases of DNA Repair	37/51	30.0026	1.2093e-27	BLM;MRE11;BRCA1;BRCA2;RAD51AP1;BRIP1;KAT5;EXO1;NTHL1;RBBP8;TOPBP1;ATRIP;MUTYH;RFC5;BARD1;RFC3;RMI2;RFC4;RFC2;RMI1;XRCC2;TOP3A;RPA1;RPA2;MLH1;PALB2;MSH6;RAD51B;NEIL3;RAD51C;RAD51;MSH2;RPA3;DNA2;RAD9B;RHNO1;RAD9A	Reactome_Pathways_2024
Module 5	Mitotic Sister Chromatid Segregation (GO:0000070)	57/120	10.3721	4.01205e-27	NCAPG2;PINX1;KIF14;KIF11;TENT4A;SMC4;KIF15;PPP1CC;CDC23;CHEK2;CHMP1B;NUP62;KNTC1;KMT5A;SPDL1;CEP55;DLGAP5;SPICE1;KIF23;KNL1;KIF22;TUBG1;KNSTRN;PSRC1;ESPL1;KIF2A;INCENP;KIFC1;BIRC5;KIF2C;SEH1L;UHRF1;CDCA5;MIS12;CDCA8;NCAPG;SKA3;NCAPH;SKA1;AURKB;SKA2;CCNB1;CEP192;SPAG5;NCAPH2;PLK1;NDC80;ZWINT;MZT1;TPX2;KIF18A;KIF18B;CENPI;PRC1;CENPK;NCAPD2;NCAPD3	GO_Biological_Process_2025
Module 5	DNA Strand Elongation	29/32	109.264	5.89566e-27	PRIM2;FEN1;PCNA;MCM7;MCM8;PRIM1;POLD3;CDC45;POLD1;GINS1;RFC5;GINS2;RFC3;RFC4;LIG1;RFC2;GINS3;GINS4;RPA1;RPA2;POLA1;POLA2;RPA3;MCM3;MCM4;MCM5;DNA2;MCM6;MCM2	Reactome_Pathways_2024
Module 5	Double-Strand Break Repair (GO:0006302)	69/176	7.43076	6.28284e-27	DCLRE1B;H2AX;DCLRE1A;FEN1;ANKLE1;MRE11;MCM8;TONSL;HMGB2;NUCKS1;BRCA1;HMGB1;BRCA2;PRPF19;TENT4A;EME1;KAT5;SFR1;ZNF83;CHEK2;SMARCAD1;TOPBP1;CYREN;GEN1;RMI2;PARP1;ZGRF1;PARP2;RMI1;TOP3A;INIP;RAD51B;MMS22L;NSMCE4A;RAD51C;DNA2;BLM;UHRF1;CDCA5;RNF8;RAD54B;RAD51AP1;RECQL4;BRIP1;ASTE1;RNF138;RAD21;NSD2;RBBP8;SLF1;SLF2;XRCC4;KDM4D;XRCC5;XRCC2;PLK1;XRCC3;XRCC1;PALB2;POLA1;PPP5C;RAD51;ARTN;TDP1;RFWD3;RPA3;A…	GO_Biological_Process_2025
Module 5	Deposition of New CENPA-containing Nucleosomes at the Centromere	37/53	26.2494	1.06085e-26	HJURP;CENPA;H2AC18;CENPC;H2AC14;H2BC26;RBBP4;MIS18BP1;H2BC21;OIP5;H4C1;RBBP7;H2BC9;CENPU;CENPW;H2BC5;H2AC4;H2BC3;H2BC4;KNL1;H2BC17;H2BC13;H2BC14;H2BC15;MIS18A;CENPH;CENPI;H2AC20;H2BC11;CENPK;CENPL;CENPM;CENPN;CENPO;CENPP;CENPQ;ITGB3BP	Reactome_Pathways_2024
Module 5	Nucleosome Assembly	37/53	26.2494	1.06085e-26	HJURP;CENPA;H2AC18;CENPC;H2AC14;H2BC26;RBBP4;MIS18BP1;H2BC21;OIP5;H4C1;RBBP7;H2BC9;CENPU;CENPW;H2BC5;H2AC4;H2BC3;H2BC4;KNL1;H2BC17;H2BC13;H2BC14;H2BC15;MIS18A;CENPH;CENPI;H2AC20;H2BC11;CENPK;CENPL;CENPM;CENPN;CENPO;CENPP;CENPQ;ITGB3BP	Reactome_Pathways_2024
Module 5	G2 M DNA Damage Checkpoint	44/77	15.1866	2.41423e-26	BLM;MRE11;RNF8;BRCA1;BRIP1;CCNB1;H2BC26;KAT5;EXO1;CHEK2;H2BC21;CHEK1;NSD2;RBBP8;H4C1;TOPBP1;ATRIP;RFC5;BARD1;H2BC9;RFC3;RMI2;RFC4;H2BC5;RFC2;RMI1;H2BC3;TOP3A;H2BC4;RPA1;RPA2;CDC25C;H2BC17;H2BC13;H2BC14;WEE1;H2BC15;RPA3;H2BC11;CDK1;DNA2;RAD9B;RHNO1;RAD9A	Reactome_Pathways_2024
Module 5	Homologous DNA Pairing and Strand Exchange	33/43	37.3783	4.88274e-26	BLM;MRE11;BRCA1;BRCA2;RAD51AP1;BRIP1;KAT5;EXO1;CHEK1;RBBP8;TOPBP1;ATRIP;BARD1;RFC5;RFC3;RMI2;RFC4;RFC2;RMI1;XRCC2;TOP3A;XRCC3;RPA1;RPA2;PALB2;RAD51B;RAD51;RAD51C;RPA3;DNA2;RAD9B;RAD9A;RHNO1	Reactome_Pathways_2024
Module 5	DNA Repair Pathways Full Network WP4946	55/120	9.68706	6.81367e-26	H2AX;FEN1;MRE11;HMGB1;BRCA1;BRCA2;EXO1;CHEK1;POLE;RFC5;RFC3;RFC4;LIG1;PARP1;RFC2;PARP2;RAD23A;MSH6;NEIL3;RAD51C;MSH2;FANCD2;PCNA;FAAP24;RAD54B;UNG;POLD3;BRIP1;NTHL1;POLD1;USP1;MUTYH;FANCI;FANCM;XRCC4;CENPX;XRCC5;FANCL;FANCA;RPA1;XRCC1;RPA2;FANCC;FANCB;FANCE;MLH1;PALB2;FANCG;RAD51;ERCC3;RPA3;POLE2;POLE3;ERCC5;CENPS	WikiPathways_2024_Human
Module 5	Senescence Associated Secretory Phenotype SASP WP3391	53/113	10.1028	1.17487e-25	H2AX;H2AC18;H2AC14;CDC23;H2BC26;H2BC21;RPS6KA1;H4C1;H4C4;H4C3;H4C6;H4C5;H3-3B;H3C8;H2AC8;H2AC4;H2BC17;CCNA2;H2BC13;H2BC14;H4C16;H2BC15;H4C13;H2BC10;H4C12;H2BC11;H4C11;ANAPC4;FZR1;H3C13;H3C11;H3C12;H3C1;H3C10;H3C3;H3C2;H3C7;H3C6;H4C8;H2BC9;H2AZ1;H2BC7;H4C9;H2BC8;CDKN2C;H2BC5;UBE2C;H2BC6;H2BC3;H2BC4;UBE2S;H2AC20;CDK2	WikiPathways_2024_Human
Module 5	DNA Damage Response (GO:0006974)	109/421	4.08363	4.20492e-25	ERCC6L;ANKLE1;MRE11;TTF2;RASSF1;KAT5;ZNF83;ALKBH1;CHEK2;CHEK1;PCLAF;FBXO5;WDHD1;ARMT1;USP3;METTL3;VRK1;WDR76;INIP;FOXP1;TRAIP;MSH6;MSH2;TIMELESS;BLM;RAD51AP1;BRIP1;OARD1;HLTF;USP51;ATRIP;BARD1;NEK4;CRADD;FANCL;XRCC5;XRCC2;XRCC3;CBX1;FANCA;CIDEB;FANCC;FANCG;FAM111A;POLA1;ARTN;TDP1;UBE2T;CDK2;WNK3;BCL2;CDK1;HROB;RAD9B;RAD18;RAD9A;H2AX;TOP2A;FEN1;MCM7;MCM8;CNRIP1;SUV39H1;CGAS;ASH2L;MCM10;BRCA1;PIDD1…	GO_Biological_Process_2025
Module 5	RHO GTPase Effectors	86/291	4.86029	5.90701e-25	ERCC6L;NUP107;ZWILCH;KIF14;BUB1B;H2AC18;CDC20;TUBA1C;PPP1CC;H2AC14;XPO1;H2BC26;PPP2R5E;H2BC21;NUF2;KNTC1;H4C1;SPDL1;H2AC4;PPP2R5D;KNL1;CDC25C;CKAP5;H2BC17;CIT;SGO1;SGO2;H2BC13;H2BC14;H2BC15;KIF2A;INCENP;H2BC11;BIRC5;KIF2C;NUP98;ITGB3BP;SEH1L;PKN3;MIS12;CDCA8;IQGAP3;CENPA;PMF1;SKA1;NUP160;AURKB;SKA2;CENPC;DSN1;NUP85;NUP43;BUB3;PAK3;BUB1;H2BC9;CENPU;H2BC5;H2BC3;NDE1;PLK1;H2BC4;TUBB4B;ZWINT;NDC80;CE…	Reactome_Pathways_2024
Module 5	Double-Strand Break Repair via Homologous Recombination (GO:0000724)	53/114	9.93665	8.05269e-25	FEN1;MRE11;MCM7;MCM8;MCMDC2;TONSL;NUCKS1;BRCA1;BRCA2;KAT5;SFR1;TOPBP1;GEN1;RMI2;RMI1;TOP3A;INIP;RAD51B;MMS22L;NSMCE4A;RAD51C;MCM3;MCM4;MCM5;MCM6;BLM;UHRF1;RAD54B;RAD51AP1;RECQL4;CDC45;ASTE1;RNF138;RAD21;RBBP8;RAD54L;GINS2;SLF1;SLF2;FANCM;KDM4D;XRCC2;XRCC3;GINS4;CDC7;FANCB;PALB2;RAD51;ARTN;RFWD3;RPA3;AUNIP;ERCC5	GO_Biological_Process_2025
Module 5	Mitotic Prophase	51/111	9.70943	1.13962e-24	RB1;NUP107;NCAPG2;SMC4;H2AC18;SMC2;LMNB1;H2AC14;H2BC26;H2BC21;NUP62;H4C1;KMT5A;TMPO;NDC1;H2AC4;VRK1;MASTL;H2BC17;NUP93;H2BC13;H2BC14;H2BC15;NUP50;H2BC11;NUP54;NUP98;NUP58;NUP205;SEH1L;NUP160;CCNB2;CCNB1;NUP85;NUP42;NUP88;NUP43;RAE1;H2BC9;NUP155;H2BC5;NCAPH2;H2BC3;PLK1;H2BC4;H2AC20;PPP2R2D;CDK1;NUP35;NCAPD3;NUP37	Reactome_Pathways_2024
Module 5	Mitotic G1 Phase and G1 S Transition	57/139	7.96056	1.77595e-24	RB1;TOP2A;LIN54;MCM7;MCM8;GMNN;MCM10;CKS1B;MYBL2;FBXO5;TK1;JAK2;POLE;LIN52;CDC25A;CCNA2;DBF4;RBL1;TFDP1;CCNE2;MCM3;MCM4;MCM5;MCM6;MCM2;PRIM2;PCNA;PRIM1;LIN9;TYMS;ORC5;CCNB1;ORC6;CDC45;ORC1;RBBP4;ORC3;ORC2;E2F1;E2F2;E2F4;CDT1;CDKN2C;RRM2;RPA1;RPA2;CDC7;CDC6;DHFR;POLA1;POLA2;WEE1;POLE2;RPA3;CDK2;POLE3;CDK1	Reactome_Pathways_2024
Module 5	Telomere Maintenance	46/92	11.396	3.03322e-24	PIF1;PRIM2;FEN1;BLM;PCNA;DSCC1;PRIM1;CHTF18;H2AC18;POLD3;H2AC14;H2BC26;POLR2B;H2BC21;POLD1;PPP6R3;H4C1;POLR2H;POLR2I;POLR2K;RFC5;H2BC9;RFC3;ACD;RFC4;LIG1;H2BC5;RFC2;H2AC4;H2BC3;H2BC4;RPA1;RPA2;H2BC17;CCNA2;H2BC13;POLA1;H2BC14;POLA2;H2BC15;H2AC20;RPA3;H2BC11;CDK2;DNA2;WRAP53	Reactome_Pathways_2024
Module 5	Defective Homologous Recombination Repair (HRR) Due to BRCA2 Loss of Function	31/41	35.0696	3.65409e-24	BLM;MRE11;BRCA1;BRCA2;RAD51AP1;BRIP1;KAT5;EXO1;RBBP8;TOPBP1;ATRIP;BARD1;RFC5;RFC3;RMI2;RFC4;RFC2;RMI1;XRCC2;TOP3A;RPA1;RPA2;PALB2;RAD51B;RAD51;RAD51C;RPA3;DNA2;RAD9B;RAD9A;RHNO1	Reactome_Pathways_2024
Module 5	Diseases of DNA Double-Strand Break Repair	31/41	35.0696	3.65409e-24	BLM;MRE11;BRCA1;BRCA2;RAD51AP1;BRIP1;KAT5;EXO1;RBBP8;TOPBP1;ATRIP;BARD1;RFC5;RFC3;RMI2;RFC4;RFC2;RMI1;XRCC2;TOP3A;RPA1;RPA2;PALB2;RAD51B;RAD51;RAD51C;RPA3;DNA2;RAD9B;RAD9A;RHNO1	Reactome_Pathways_2024
Module 5	Base Excision Repair	40/71	14.6618	1.07558e-23	FEN1;PARG;PCNA;H2AC18;UNG;POLD3;H2AC14;H2BC26;NTHL1;H2BC21;POLD1;H4C1;POLE;MUTYH;RFC5;H2BC9;RFC3;ACD;RFC4;LIG1;PARP1;H2BC5;PARP2;RFC2;H2AC4;H2BC3;H2BC4;RPA1;RPA2;XRCC1;H2BC17;H2BC13;H2BC14;NEIL3;H2BC15;H2AC20;POLE2;RPA3;H2BC11;POLE3	Reactome_Pathways_2024
Module 5	G1 S Transition	52/121	8.60967	1.59658e-23	RB1;LIN54;MCM7;MCM8;GMNN;MCM10;CKS1B;FBXO5;TK1;POLE;LIN52;CDC25A;CCNA2;DBF4;RBL1;TFDP1;CCNE2;MCM3;MCM4;MCM5;MCM6;MCM2;PRIM2;PCNA;PRIM1;LIN9;TYMS;ORC5;CCNB1;ORC6;CDC45;ORC1;RBBP4;ORC3;ORC2;E2F1;E2F4;CDT1;RRM2;RPA1;RPA2;CDC7;CDC6;DHFR;POLA1;POLA2;WEE1;POLE2;RPA3;CDK2;POLE3;CDK1	Reactome_Pathways_2024
Module 5	Presynaptic Phase of Homologous DNA Pairing and Strand Exchange	30/40	33.9174	3.14967e-23	BLM;MRE11;BRCA1;BRCA2;BRIP1;KAT5;EXO1;CHEK1;RBBP8;TOPBP1;ATRIP;BARD1;RFC5;RFC3;RMI2;RFC4;RFC2;RMI1;XRCC2;TOP3A;RPA1;RPA2;RAD51B;RAD51;RAD51C;RPA3;DNA2;RAD9B;RAD9A;RHNO1	Reactome_Pathways_2024
Module 5	DNA Replication Pre-Initiation	51/118	8.69169	3.14967e-23	MCM7;MCM8;GMNN;MCM10;H2AC18;CDC23;H2AC14;H2BC26;H2BC21;H4C1;POLE;H2AC4;H2BC17;H2BC13;H2BC14;DBF4;H2BC15;H2BC11;MCM3;ANAPC4;MCM4;MCM5;MCM6;MCM2;PRIM2;PRIM1;ORC5;FZR1;ORC6;CDC45;ORC1;ORC3;ORC2;H2BC9;CDT1;H2BC5;UBE2C;H2BC3;H2BC4;RPA1;RPA2;CDC7;CDC6;POLA1;POLA2;UBE2S;H2AC20;POLE2;RPA3;CDK2;POLE3	Reactome_Pathways_2024
Module 5	Systemic lupus erythematosus	55/135	7.86428	1.39466e-22	H2AX;CD40;H2AC16;H2AC17;H2AC18;H2AC11;H2AC12;H2AC13;H2AC14;H2BC21;H4C1;H4C4;H4C3;HLA-DOB;H4C6;H4C5;H3-3B;HLA-DPA1;H3C8;H2AC8;H2AC4;H2BC17;H2BC18;H2BC13;H2BC14;H2BC15;H4C13;H2BC10;H4C12;H2BC11;H4C11;SNRPB;H3C13;H3C11;H3C12;H3C1;H3C10;H3C3;H3C2;H3C7;H3C6;H4C8;H2AZ1;H2BC9;H2BC7;H4C9;H2BC8;H2BC5;H2BC6;H2BC3;H2BC4;H3-5;H2AC20;H2AC21;HLA-DPB1	KEGG_2021_Human
Module 5	Synthesis of DNA	48/108	9.1212	1.62823e-22	PRIM2;FEN1;PCNA;MCM7;MCM8;PRIM1;GMNN;ORC5;POLD3;FZR1;CDC23;ORC6;CDC45;ORC1;ORC3;POLD1;ORC2;POLE;RFC5;GINS1;CDT1;GINS2;RFC3;RFC4;LIG1;UBE2C;RFC2;GINS3;GINS4;RPA1;RPA2;CDC6;CCNA2;POLA1;POLA2;CCNE2;UBE2S;POLE2;RPA3;CDK2;POLE3;MCM3;ANAPC4;MCM4;MCM5;DNA2;MCM6;MCM2	Reactome_Pathways_2024
Module 5	DNA IR Damage And Cellular Response Via ATR WP4016	42/81	12.2468	1.85379e-22	H2AX;DCLRE1A;FEN1;MRE11;PCNA;BRCA1;FOXM1;BRCA2;RECQL4;BRIP1;CDC45;EXO1;CHEK2;CHEK1;USP1;RBBP8;E2F1;TOPBP1;CLSPN;ATRIP;FANCI;BARD1;PARP1;RMI1;XRCC5;TOP3A;PLK1;FANCA;RPA1;RPA2;CDC25C;MLH1;PALB2;RAD51;MSH2;FANCD2;RFWD3;TDP1;CDK2;CDK1;MCM2;RAD9A	WikiPathways_2024_Human
Module 5	Transcriptional Regulation by Small RNAs	39/75	12.2988	2.02013e-21	NUP205;NUP107;SEH1L;NUP160;H2AC18;H2AC14;H2BC26;NUP42;NUP85;POLR2B;H2BC21;NUP62;NUP43;NUP88;H4C1;POLR2H;POLR2I;RAE1;POLR2K;NDC1;H2BC9;H2BC5;NUP155;H2AC4;H2BC3;H2BC4;H2BC17;NUP93;H2BC13;H2BC14;H2BC15;NUP50;H2AC20;H2BC11;NUP35;NUP54;NUP98;NUP58;NUP37	Reactome_Pathways_2024
Module 5	Cell cycle	51/124	7.97468	2.18787e-21	RB1;MCM7;BUB1B;CDC20;CDC23;PTTG1;CHEK2;CHEK1;CDC25C;CDC25A;CDC25B;CCNA2;DBF4;RBL1;TFDP1;CCNE2;ESPL1;MCM3;ANAPC4;MCM4;MCM5;MCM6;MCM2;HDAC2;PCNA;TTK;PKMYT1;ORC5;CCNB2;CCNB1;FZR1;ORC6;CDC45;ORC1;ORC3;RAD21;ORC2;E2F1;E2F2;BUB3;E2F4;BUB1;CDKN2C;PLK1;CDC7;CDC6;STAG1;WEE1;CDK2;CDK1;MAD2L1	KEGG_2021_Human
Module 5	Processing of Capped Intron-Containing Pre-mRNA	79/285	4.42299	4.58702e-21	TCERG1;NUP107;EIF4A3;GPATCH1;CASC3;DDX41;PRPF19;USP39;PQBP1;GLE1;PNN;CLP1;PCF11;MAGOH;NUP62;NDC1;METTL3;THOC3;WBP11;NUP93;GCFC2;PRPF4;DDX39A;SARNP;PRPF3;NUP50;PPIH;SNRPE;NUP54;NUP98;SRSF6;NUP58;SNRPB;RBM22;SLBP;NUP205;SEH1L;CSTF2;CWF19L2;U2AF1;NUP160;PABPN1;NUP85;NUP42;POLR2B;DHX35;TRA2B;CSTF1;NUP88;NUP43;POLR2H;POLR2I;RAE1;SRSF10;POLR2K;SF3A3;CPSF4;CPSF7;SF3A2;CPSF6;NUP155;CPSF3;CDC5L;MAGOHB;LSM…	Reactome_Pathways_2024
Module 5	DNA Replication (GO:0006260)	39/73	13.0237	8.3088e-21	FEN1;BLM;RNASEH2A;MCM7;MCM8;ORC5;POLD3;RECQL4;CHRAC1;ORC3;POLD1;CHEK1;PCLAF;MCMBP;NT5M;POLE;RFC5;WDHD1;RFC3;DUT;RFC4;RFC2;TWNK;DONSON;WRNIP1;TICRR;FAM111B;FAM111A;POLA1;POLA2;POLE2;RPA3;CDK2;POLE3;CDK1;MCM4;MCM5;DNA2;MCM6	GO_Biological_Process_2025
Module 5	Cell Cycle WP179	49/120	7.86881	1.57225e-20	RB1;MCM7;CDC20;CDC23;PTTG1;CHEK2;CHEK1;CDC25C;CDC25A;CDC25B;CCNA2;RBL1;DBF4;TFDP1;CCNE2;ESPL1;MCM3;ANAPC4;MCM4;MCM5;MCM6;MCM2;HDAC2;PCNA;TTK;PKMYT1;ORC5;CCNB2;CCNB1;FZR1;ORC6;CDC45;ORC1;ORC3;RAD21;ORC2;E2F1;E2F2;E2F4;BUB3;BUB1;CDKN2C;PLK1;CDC7;CDC6;STAG1;WEE1;CDK2;CDK1	WikiPathways_2024_Human
Module 5	DNA replication	27/36	33.8566	1.99732e-20	PRIM2;FEN1;PCNA;RNASEH2A;MCM7;PRIM1;POLD3;POLD1;POLE;RFC5;RFC3;RFC4;LIG1;RFC2;RPA1;RPA2;POLA1;POLA2;POLE2;RPA3;POLE3;MCM3;MCM4;MCM5;DNA2;MCM6;MCM2	KEGG_2021_Human
Module 5	Gene Expression (Transcription)	244/1615	2.14591	2.98869e-20	TDRKH;RB1;NUP107;EIF4A3;RBPJ;H2AC18;LIPE;CDC23;H2AC14;KAT5;CLP1;ZNF726;CHEK2;MAGOH;CHEK1;SAP130;ZNF724;MTERF1;H4C1;MED1;SAP30BP;MED6;MED7;NUP93;DDX39A;ZNF718;SARNP;TFAM;NUP98;DNA2;RHNO1;SLBP;NUP205;SEH1L;ZNF273;PAXIP1;CSTF2;BRIP1;NUP85;CSTF1;ZNF701;NUP88;ZNF700;ATRIP;KAT14;ZNF266;NR2C2AP;BARD1;ZNF141;CRADD;NR1D2;CDC7;NR1D1;MAGOHB;TPX2;H2AC20;ZNF30;RNPS1;INTS7;INTS9;ZNF257;EZH2;RET;SETD9;SUV39H1;Z…	Reactome_Pathways_2024
Module 5	Meiosis	41/89	9.70282	5.57928e-20	BLM;MRE11;SYCP2;BRCA1;BRCA2;H2AC18;LMNB1;SYCE2;H2AC14;H2BC26;FIRRM;H2BC21;FIGNL1;RAD21;RBBP8;H4C1;H2BC9;ACD;UBE2I;H2BC5;H2AC4;H2BC3;TOP3A;H2BC4;RPA1;RPA2;HSPA2;MLH1;H2BC17;H2BC13;H2BC14;STAG1;H2BC15;RAD51C;RAD51;STAG3;H2AC20;RPA3;DMC1;H2BC11;CDK2	Reactome_Pathways_2024
Module 5	Impaired BRCA2 Binding to RAD51	26/35	32.5826	5.57928e-20	BLM;MRE11;BRCA1;BRCA2;BRIP1;KAT5;EXO1;RBBP8;TOPBP1;ATRIP;BARD1;RFC5;RFC3;RMI2;RFC4;RFC2;RMI1;TOP3A;RPA1;RPA2;RAD51;RPA3;DNA2;RAD9B;RAD9A;RHNO1	Reactome_Pathways_2024
Module 5	Spindle (GO:0005819)	68/227	4.91095	1.34066e-19	GMNN;PINX1;BUB1B;KIF11;CDC20;FAM110A;NUDCD2;CSPP1;NUP62;WDR5;FBXO5;ZNF367;DLGAP5;CKAP2L;SPICE1;CKAP2;HAUS3;KIF23;KIF22;HASPIN;TUBG1;KNSTRN;CCSAP;CKAP5;PSRC1;KIF2A;FAM161A;ESPL1;INCENP;KIFC1;KIF16B;BIRC5;KIF2C;KIF20A;HDAC3;UHRF1;SPESP1;NCAPG;TTK;HMMR;SKA3;TTL;SKA1;AURKB;SKA2;AURKA;RACGAP1;ECT2;FAM83D;KAT14;SAC3D1;SPAG5;PLK1;CBX1;CDC7;CDC6;HSPA2;TUBB4B;MZT1;TPX2;CENPF;KATNBL1;PRC1;KIF4A;TACC3;CDK1;…	GO_Cellular_Component_2025
Module 5	Alcoholism	60/186	5.45047	3.47642e-19	H2AX;CALML4;H2AC16;H2AC17;H2AC18;H2AC11;H2AC12;PPP1CC;H2AC13;H2AC14;CREB3L4;H2BC21;H4C1;H4C4;H4C3;H4C6;H4C5;H3-3B;H3C8;H2AC8;H2AC4;H2BC17;H2BC18;H2BC13;H2BC14;H2BC15;H4C13;H2BC10;H4C12;HAT1;H2BC11;H4C11;SHC2;HDAC2;SHC3;HDAC3;GNG5;H3C13;H3C11;H3C12;H3C1;H3C10;H3C3;H3C2;H3C7;H3C6;H4C8;H2AZ1;H2BC9;H2BC7;H4C9;H2BC8;H2BC5;H2BC6;H2BC3;H2BC4;H3-5;H2AC20;H2AC21;GNB3	KEGG_2021_Human
Module 5	Positive Regulation of Cell Cycle Process (GO:0090068)	48/119	7.70342	3.57459e-19	GPSM2;FEN1;NCAPG2;KIF14;CDCA8;NCAPG;DBF4B;SMC4;NCAPH;AURKB;AURKA;RACGAP1;CSPP1;RAD21;NUP62;ECT2;ZNF367;E2F7;E2F8;GEN1;PLK4;RANBP1;STIL;RRM1;SPAG5;NCAPH2;CEP295;XRCC3;CDC7;KIF23;KNL1;CDC6;NDC80;CDC25B;EREG;PLSCR1;DBF4;INCENP;SASS6;BIRC5;PHIP;NCAPD2;PKN2;NCAPD3;KIF20B;RAD18;RHNO1;MAD2L1	GO_Biological_Process_2025
Module 5	Meiotic Recombination	32/57	14.4774	5.96635e-19	BLM;MRE11;BRCA1;BRCA2;H2AC18;H2AC14;H2BC26;FIRRM;H2BC21;FIGNL1;RBBP8;H4C1;H2BC9;H2BC5;H2AC4;H2BC3;TOP3A;H2BC4;RPA1;RPA2;MLH1;H2BC17;H2BC13;H2BC14;H2BC15;RAD51C;RAD51;H2AC20;RPA3;DMC1;H2BC11;CDK2	Reactome_Pathways_2024
Module 5	Mitotic G2-G2 M Phases	59/186	5.31379	7.32663e-19	LIN54;CCP110;FOXM1;TUBA1C;XPO1;CNTRL;NEK2;MYBL2;GTSE1;CDK5RAP2;LIN52;BORA;CEP135;FKBPL;HAUS3;HAUS6;HAUS5;CDC25C;TUBG1;CKAP5;CDC25A;HAUS2;CDC25B;HAUS1;CCNA2;SFI1;HMMR;LIN9;PKMYT1;AURKA;CCNB2;CCNB1;HAUS8;RBBP4;E2F1;CEP72;CEP192;CEP76;CEP78;PLK4;ODF2;CEP152;NDE1;PLK1;TUBB4B;MZT1;TPX2;NEDD1;CENPF;WEE1;CENPJ;CDK2;ALMS1;CDK1;TUBGCP5;TUBGCP3;CEP41;CEP43;TUBA8	Reactome_Pathways_2024
Module 5	Defective Pyroptosis	27/41	21.759	1.41771e-18	PRIM2;DNMT1;PRIM1;H2AC18;H2AC14;H2BC26;RBBP4;H2BC21;DNMT3B;H4C1;RBBP7;H2BC9;SUZ12;H2BC5;EED;H2AC4;H2BC3;H2BC4;H2BC17;H2BC13;POLA1;H2BC14;POLA2;H2BC15;H2AC20;H2BC11;EZH2	Reactome_Pathways_2024
Module 5	DNA-templated DNA Replication (GO:0006261)	32/55	15.7381	1.75926e-18	PRIM2;MCM7;PRIM1;MCM10;ORC5;POLD3;CDC45;CHRAC1;ORC6;ORC3;POLD1;MCMBP;TOPBP1;POLE;RFC5;WDHD1;MGME1;RFC3;RRM1;RFC4;RFC2;TWNK;WRNIP1;CDC6;POLA1;POLA2;POLE2;POLE3;MCM3;MCM4;MCM5;DNA2	GO_Biological_Process_2025
Module 5	Fanconi anemia pathway	31/54	15.2368	1.91594e-18	BLM;FAAP24;BRCA1;BRCA2;BRIP1;EME1;USP1;HES1;ATRIP;FANCI;RMI2;CENPX;FANCM;RMI1;FANCL;TOP3A;FANCA;RPA1;RPA2;FANCC;FANCB;FANCE;MLH1;PALB2;FANCG;RAD51C;RAD51;FANCD2;RPA3;UBE2T;CENPS	KEGG_2021_Human
Module 5	G2 M Transition	58/184	5.26217	2.0783e-18	LIN54;CCP110;FOXM1;TUBA1C;XPO1;CNTRL;NEK2;MYBL2;GTSE1;CDK5RAP2;LIN52;BORA;CEP135;FKBPL;HAUS3;HAUS6;HAUS5;CDC25C;TUBG1;CKAP5;CDC25A;HAUS2;CDC25B;HAUS1;CCNA2;SFI1;HMMR;LIN9;PKMYT1;AURKA;CCNB2;CCNB1;HAUS8;RBBP4;CEP72;CEP192;CEP76;CEP78;PLK4;ODF2;CEP152;NDE1;PLK1;TUBB4B;MZT1;TPX2;NEDD1;CENPF;WEE1;CENPJ;CDK2;ALMS1;CDK1;TUBGCP5;TUBGCP3;CEP41;CEP43;TUBA8	Reactome_Pathways_2024
Module 5	SUMOylation of DNA Replication Proteins	28/46	17.5575	6.3984e-18	TOP2A;NUP205;NUP107;PCNA;SEH1L;CDCA8;AURKB;NUP160;AURKA;NUP42;NUP85;NUP62;SUMO2;NUP43;NUP88;RAE1;NDC1;UBE2I;NUP155;NUP93;INCENP;NUP50;BIRC5;NUP35;NUP54;NUP98;NUP58;NUP37	Reactome_Pathways_2024
Module 5	HDR Through Single Strand Annealing (SSA)	25/37	23.4788	1.25222e-17	BLM;MRE11;BRCA1;BRIP1;KAT5;EXO1;RBBP8;TOPBP1;ATRIP;BARD1;RFC5;RFC3;RMI2;RFC4;RFC2;RMI1;TOP3A;RPA1;RPA2;RAD51;RPA3;DNA2;RAD9B;RAD9A;RHNO1	Reactome_Pathways_2024
Module 5	G1 To S Cell Cycle Control WP45	33/64	12.0437	1.51861e-17	RB1;PRIM2;PCNA;MCM7;PRIM1;ORC5;CCNB1;ORC6;CDC45;ORC1;CREB3L4;ORC3;ORC2;E2F1;E2F2;POLE;CDKN2C;RPA1;RPA2;CDC25A;POLA2;WEE1;TFDP1;CCNE2;POLE2;RPA3;CDK2;MCM3;CDK1;MCM4;MCM5;MCM6;MCM2	WikiPathways_2024_Human
Module 5	Recombinational Repair (GO:0000725)	42/101	8.08651	2.5658e-17	BLM;FEN1;MRE11;MCM8;UHRF1;TONSL;NUCKS1;BRCA1;BRCA2;RAD54B;RAD51AP1;RECQL4;KAT5;SFR1;ASTE1;RNF138;RBBP8;TOPBP1;GEN1;RMI2;SLF1;SLF2;KDM4D;ZGRF1;XRCC5;RMI1;XRCC2;XRCC3;TOP3A;PALB2;INIP;RAD51B;MMS22L;NSMCE4A;RAD51C;RAD51;ARTN;RFWD3;RPA3;AUNIP;ERCC5;RHNO1	GO_Biological_Process_2025
Module 5	Resolution of D-loop Structures Through Holliday Junction Intermediates	24/35	24.5749	3.69002e-17	BARD1;GEN1;BLM;RMI2;MRE11;RMI1;XRCC2;TOP3A;XRCC3;BRCA1;BRCA2;PALB2;RAD51AP1;RAD51B;BRIP1;RAD51;RAD51C;EME1;KAT5;EXO1;FIGNL1;FIRRM;RBBP8;DNA2	Reactome_Pathways_2024
Module 5	Condensation of Prophase Chromosomes	26/42	18.3207	6.37388e-17	RB1;NCAPG2;SMC4;H2AC18;SMC2;CCNB1;H2AC14;H2BC26;H2BC21;H4C1;KMT5A;H2BC9;H2BC5;H2AC4;H2BC3;NCAPH2;H2BC4;PLK1;H2BC17;H2BC13;H2BC14;H2BC15;H2AC20;H2BC11;CDK1;NCAPD3	Reactome_Pathways_2024
Module 5	Resolution of D-Loop Structures	24/36	22.5258	9.84717e-17	BARD1;GEN1;BLM;RMI2;MRE11;RMI1;XRCC2;TOP3A;XRCC3;BRCA1;BRCA2;PALB2;RAD51AP1;RAD51B;BRIP1;RAD51;RAD51C;EME1;KAT5;EXO1;FIGNL1;FIRRM;RBBP8;DNA2	Reactome_Pathways_2024
Module 5	DNA Recombination (GO:0006310)	27/43	19.0371	1.0278e-16	BLM;MRE11;UHRF1;HMGB3;BRCA1;HMGB1;RAD54B;BRIP1;EXO1;RAD21;RBBP8;RAD54L;TOPBP1;BARD1;GEN1;RMI2;RMI1;XRCC5;ZGRF1;XRCC2;TOP3A;XRCC3;RAD51B;RAD51;RAD51C;MSH2;RHNO1	GO_Biological_Process_2025
Module 5	Regulation of TP53 Activity Through Phosphorylation	38/92	7.97618	1.36607e-16	BLM;MRE11;BRCA1;AURKB;AURKA;BRIP1;KAT5;EXO1;CHEK2;CHEK1;RBBP8;TOPBP1;ATRIP;RFC5;BARD1;RFC3;RMI2;RFC4;TBP;RFC2;RMI1;TOP3A;RPA1;RPA2;SSRP1;CCNA2;TPX2;CDK5;RPA3;CDK2;TAF4B;MAPKAPK5;DNA2;TAF5;RAD9B;TAF3;RHNO1;RAD9A	Reactome_Pathways_2024
Module 5	Neutrophil extracellular trap formation	56/189	4.80543	3.92391e-16	H2AX;ITGA2B;HMGB1;H2AC16;H2AC17;H2AC18;H2AC11;H2AC12;H2AC13;H2AC14;H2BC21;H4C1;H4C4;H4C3;H4C6;H4C5;H3-3B;H3C8;H2AC8;H2AC4;H2BC17;H2BC18;H2BC13;H2BC14;H2BC15;H4C13;H2BC10;H4C12;HAT1;H2BC11;H4C11;HDAC2;HDAC3;H3C13;H3C11;H3C12;H3C1;H3C10;H3C3;H3C2;H3C7;H3C6;H4C8;H2AZ1;H2BC9;H2BC7;H4C9;H2BC8;H2BC5;H2BC6;H2BC3;H2BC4;MAPK13;H3-5;H2AC20;H2AC21	KEGG_2021_Human
Module 5	AURKA Activation by TPX2	33/72	9.56901	4.44534e-16	CCP110;HMMR;AURKA;HAUS8;CNTRL;CEP72;NEK2;CEP192;CEP76;CDK5RAP2;CEP78;PLK4;CEP135;ODF2;CEP152;NDE1;PLK1;HAUS3;HAUS6;HAUS5;TUBG1;TUBB4B;CKAP5;HAUS2;HAUS1;NEDD1;TPX2;CENPJ;ALMS1;CDK1;CEP41;SFI1;CEP43	Reactome_Pathways_2024
Module 5	PRC2 Methylates Histones and DNA	25/41	17.6053	4.52773e-16	DNMT1;H2AC18;H2AC14;H2BC26;RBBP4;H2BC21;DNMT3B;H4C1;RBBP7;H2BC9;SUZ12;H2BC5;EED;H2AC4;H2BC3;H2BC4;H2BC17;H2BC13;H2BC14;H2BC15;H2AC20;H2BC11;MTF2;EZH2;PHF19	Reactome_Pathways_2024
Module 5	G1 S-Specific Transcription	21/29	29.5172	8.06832e-16	LIN54;CDT1;PCNA;RRM2;LIN9;CDC6;TYMS;CDC25A;DHFR;POLA1;CDC45;RBL1;TFDP1;ORC1;RBBP4;E2F1;CDK1;E2F4;FBXO5;TK1;LIN52	Reactome_Pathways_2024
Module 5	Anchoring of the Basal Body to the Plasma Membrane	38/97	7.29824	1.09191e-15	FBF1;CCP110;HAUS8;TCTN2;CNTRL;CEP72;NEK2;CEP192;CEP97;CEP76;CDK5RAP2;CEP78;PLK4;IQCB1;CEP135;ODF2;CEP152;NDE1;PLK1;SCLT1;HAUS3;KIF24;HAUS6;HAUS5;TUBG1;TUBB4B;CKAP5;HAUS2;HAUS1;NEDD1;CENPJ;ALMS1;CDK1;CEP83;CEP41;SFI1;CEP43;CEP89	Reactome_Pathways_2024
Module 5	Impaired BRCA2 Binding to PALB2	19/24	42.6843	1.48027e-15	BARD1;BLM;RMI2;MRE11;RMI1;XRCC2;TOP3A;BRCA1;BRCA2;PALB2;RAD51AP1;RAD51B;BRIP1;RAD51;RAD51C;KAT5;EXO1;RBBP8;DNA2	Reactome_Pathways_2024
Module 5	Nuclear Chromosome (GO:0000228)	37/90	7.90835	1.53117e-15	TOP2A;BLM;MCM7;SUV39H1;NCAPG2;PINX1;NCAPG;CHD1;SMC4;NCAPH;SMCHD1;ING3;CDC45;KAT5;EXOSC9;FIGNL1;CHEK1;RCC1;BRD8;GINS1;H2AZ1;GINS2;GINS3;NCAPH2;GINS4;TUBG1;UCHL5;RAD51;MCM3;ANP32E;BIRC5;MCM4;MCM5;NCAPD2;RGS12;MCM6;NCAPD3	GO_Cellular_Component_2025
Module 5	Resolution of D-loop Structures Through Synthesis-Dependent Strand Annealing (SDSA)	20/27	32.1096	2.1146e-15	BARD1;BLM;RMI2;MRE11;RMI1;XRCC2;TOP3A;XRCC3;BRCA1;BRCA2;PALB2;RAD51AP1;RAD51B;BRIP1;RAD51;RAD51C;KAT5;EXO1;RBBP8;DNA2	Reactome_Pathways_2024
Module 5	Mitotic Nuclear Division (GO:0140014)	27/47	15.2263	2.50281e-15	MIS12;NCAPG2;SKA3;SMC4;SKA1;SKA2;EPS8;PPP1CC;NUP62;KNTC1;SPAG5;UBE2C;NDE1;PLK1;KNL1;TUBG1;KNSTRN;NDC80;ZWINT;KIF18A;KIF18B;ESPL1;CENPI;KIFC1;UBE2S;CENPK;PPP2R2D	GO_Biological_Process_2025
Module 5	Epigenetic Regulation of Gene Expression	70/291	3.62932	3.42818e-15	RB1;SUV39H1;ASH2L;TTF1;H2AC18;PAGR1;LIPE;H2AC14;H2BC26;H2BC21;ZNF649;SAP130;SUMO2;DNMT3B;WDR5;H4C1;MED1;SAP30BP;ZNF680;TBP;EED;H2AC4;ACTL6A;BAZ1B;H2BC17;MED6;MED7;SAP30;H2BC13;H2BC14;H2BC15;ZNF93;ZNF519;MTF2;H2BC11;POLR1C;PLIN2;PPARG;SMARCD1;DNMT1;HDAC2;PAXIP1;ZNF273;HDAC3;UHRF1;CXXC1;RBBP4;RBBP5;TAF1A;ZNF669;POLR2H;RBBP7;KAT14;POLR2K;H2BC9;SUZ12;ZNF141;UBE2I;H2BC5;H2BC3;H2BC4;DEK;GPAM;CDK5;ERCC3…	Reactome_Pathways_2024
Module 5	Reproduction	43/127	5.81071	5.12062e-15	BLM;MRE11;SYCP2;ADAM21;BRCA1;BRCA2;H2AC18;LMNB1;SYCE2;H2AC14;H2BC26;FIGNL1;RAD21;FIRRM;H2BC21;RBBP8;H4C1;H2BC9;ACD;UBE2I;H2BC5;H2AC4;NANOS3;H2BC3;TOP3A;H2BC4;RPA1;RPA2;HSPA2;MLH1;H2BC17;H2BC13;STAG1;H2BC14;H2BC15;RAD51C;RAD51;STAG3;H2AC20;RPA3;CDK2;DMC1;H2BC11	Reactome_Pathways_2024
Module 5	Defective HDR Through Homologous Recombination Repair Due to PALB2 Loss of BRCA1 Binding Function	19/25	35.5683	5.12062e-15	BARD1;BLM;RMI2;MRE11;RMI1;XRCC2;TOP3A;BRCA1;BRCA2;PALB2;RAD51AP1;RAD51B;BRIP1;RAD51;RAD51C;KAT5;EXO1;RBBP8;DNA2	Reactome_Pathways_2024
Module 5	Defective HDR Through Homologous Recomb Repair Due to PALB2 Loss of BRCA2 RAD51 RAD51C Binding Fnc	19/25	35.5683	5.12062e-15	BARD1;BLM;RMI2;MRE11;RMI1;XRCC2;TOP3A;BRCA1;BRCA2;PALB2;RAD51AP1;RAD51B;BRIP1;RAD51;RAD51C;KAT5;EXO1;RBBP8;DNA2	Reactome_Pathways_2024
Module 5	Defective Homologous Recombination Repair (HRR) Due to BRCA1 Loss of Function	19/25	35.5683	5.12062e-15	BARD1;BLM;RMI2;MRE11;RMI1;XRCC2;TOP3A;BRCA1;BRCA2;PALB2;RAD51AP1;RAD51B;BRIP1;RAD51;RAD51C;KAT5;EXO1;RBBP8;DNA2	Reactome_Pathways_2024
Module 5	Defective Homologous Recombination Repair (HRR) Due to PALB2 Loss of Function	19/25	35.5683	5.12062e-15	BARD1;BLM;RMI2;MRE11;RMI1;XRCC2;TOP3A;BRCA1;BRCA2;PALB2;RAD51AP1;RAD51B;BRIP1;RAD51;RAD51C;KAT5;EXO1;RBBP8;DNA2	Reactome_Pathways_2024
Module 5	Lagging Strand Synthesis	17/20	63.581	6.19632e-15	RFC5;PRIM2;FEN1;RFC3;PCNA;RFC4;LIG1;RFC2;PRIM1;RPA1;RPA2;POLD3;POLA1;POLA2;POLD1;RPA3;DNA2	Reactome_Pathways_2024
Module 5	Signaling by Rho GTPases	120/672	2.52526	6.2786e-15	ERCC6L;NUP107;ZWILCH;CCP110;BUB1B;H2AC18;CDC20;ARHGAP44;DOCK10;PREX1;PPP1CC;H2AC14;WDR91;KNTC1;H4C1;CEP97;TMPO;RALBP1;STARD8;H2AC4;KNL1;KCTD3;CDC25C;SGO1;SGO2;DEPDC1B;PHIP;NUP98;GRB7;SEH1L;ARHGEF26;ARHGAP19;CDCA8;IQGAP3;PMF1;SKA1;NUP160;SKA2;DSN1;RACGAP1;NUP85;ECT2;CPSF7;ARHGEF39;PLK1;NDC80;ZWINT;ARHGAP33;ANLN;ARHGAP32;DIAPH2;KIF18A;DIAPH3;H2AC20;TUBA8;ARHGAP11A;KIF14;OSBPL11;LMNB1;TUBA1C;XPO1;H2…	Reactome_Pathways_2024
Module 5	Diseases of Programmed Cell Death	33/78	8.29043	6.93402e-15	PRIM2;DNMT1;PRIM1;H2AC18;LMNB1;H2AC14;H2BC26;RBBP4;H2BC21;DNMT3B;H4C1;RBBP7;H2BC9;SUZ12;H2BC5;EED;H2AC4;H2BC3;H2BC4;TRAF2;CDC25C;H2BC17;CDC25A;CDC25B;H2BC13;POLA1;H2BC14;POLA2;H2BC15;CDK5;H2AC20;H2BC11;EZH2	Reactome_Pathways_2024
Module 5	Signaling by Rho GTPases, Miro GTPases and RHOBTB3	121/688	2.47847	1.48645e-14	ERCC6L;NUP107;ZWILCH;CCP110;BUB1B;H2AC18;CDC20;ARHGAP44;DOCK10;PREX1;PPP1CC;H2AC14;WDR91;KNTC1;H4C1;CEP97;TMPO;RALBP1;STARD8;H2AC4;KNL1;KCTD3;CDC25C;SGO1;SGO2;DEPDC1B;PHIP;NUP98;GRB7;SEH1L;ARHGEF26;ARHGAP19;CDCA8;IQGAP3;PMF1;SKA1;NUP160;SKA2;DSN1;RACGAP1;NUP85;ECT2;CPSF7;ARHGEF39;PLK1;NDC80;ZWINT;ARHGAP33;ANLN;ARHGAP32;DIAPH2;KIF18A;DIAPH3;H2AC20;TUBA8;ARHGAP11A;KIF14;OSBPL11;LMNB1;TUBA1C;XPO1;H2…	Reactome_Pathways_2024
Module 5	Mitotic Spindle (GO:0072686)	48/155	5.10155	1.70436e-14	HDAC3;SPESP1;GMNN;NCAPG;KIF11;SKA3;SKA1;AURKA;NUDCD2;RACGAP1;HAUS8;NUP62;WDR5;ECT2;FAM83D;ZNF367;KAT14;DLGAP5;SPAG5;CKAP2L;CEP295;CKAP2;HAUS3;CDC7;HAUS6;KIF23;CDC6;HAUS5;KIF22;TUBG1;TUBB4B;KNSTRN;CCSAP;CKAP5;HAUS2;HAUS1;TPX2;KIF18A;KIF18B;FAM161A;ESPL1;KIF2A;KIFC1;KATNBL1;CDK1;TACC3;KIF20A;MAD2L1	GO_Cellular_Component_2025
Module 5	Sister Chromatid Segregation (GO:0000819)	23/36	19.9133	2.20761e-14	RB1;TOP2A;SPAG5;MIS12;NCAPG2;PLK1;KNL1;SKA3;TUBG1;SMC4;KNSTRN;SKA1;NDC80;ZWINT;SKA2;PPP1CC;KIF18A;KIF18B;ESPL1;CENPI;KIFC1;CENPK;KNTC1	GO_Biological_Process_2025
Module 5	RNA Polymerase II Transcription	197/1360	2.00066	2.42239e-14	RB1;EIF4A3;RBPJ;H2AC18;CDC23;H2AC14;KAT5;CLP1;ZNF726;CHEK2;CHEK1;MAGOH;ZNF724;H4C1;MED1;MED6;MED7;DDX39A;ZNF718;SARNP;DNA2;RHNO1;SLBP;ZNF273;CSTF2;BRIP1;CSTF1;ZNF701;ZNF700;ATRIP;ZNF266;NR2C2AP;BARD1;ZNF141;CRADD;CDC7;NR1D2;NR1D1;MAGOHB;TPX2;H2AC20;ZNF30;INTS7;RNPS1;INTS9;ZNF257;EZH2;RET;SETD9;ZNF43;ASH2L;ZNF45;BRCA1;CTSV;XPO1;PCF11;ZNF486;ZIK1;TEAD4;RMI2;PARP1;RMI1;ACTL6A;TOP3A;PPARG;ZNF473;PCNA…	Reactome_Pathways_2024
Module 5	Centrosome Maturation	33/81	7.771	2.53701e-14	CCP110;HAUS8;CNTRL;CEP72;NEK2;CEP192;CEP76;CDK5RAP2;CEP78;PLK4;CEP135;ODF2;CEP152;NDE1;PLK1;HAUS3;HAUS6;HAUS5;TUBG1;TUBB4B;CKAP5;HAUS2;MZT1;HAUS1;NEDD1;CENPJ;ALMS1;CDK1;TUBGCP5;TUBGCP3;CEP41;SFI1;CEP43	Reactome_Pathways_2024
Module 5	Recruitment of Mitotic Centrosome Proteins and Complexes	33/81	7.771	2.53701e-14	CCP110;HAUS8;CNTRL;CEP72;NEK2;CEP192;CEP76;CDK5RAP2;CEP78;PLK4;CEP135;ODF2;CEP152;NDE1;PLK1;HAUS3;HAUS6;HAUS5;TUBG1;TUBB4B;CKAP5;HAUS2;MZT1;HAUS1;NEDD1;CENPJ;ALMS1;CDK1;TUBGCP5;TUBGCP3;CEP41;SFI1;CEP43	Reactome_Pathways_2024
Module 5	Nuclear Pore Complex (NPC) Disassembly	22/36	17.6752	2.76178e-14	NDC1;NUP205;NUP107;SEH1L;NUP155;NUP160;NUP93;CCNB2;CCNB1;NUP42;NUP85;NUP50;NUP62;CDK1;NUP35;NUP43;NUP88;NUP54;NUP98;RAE1;NUP58;NUP37	Reactome_Pathways_2024
Module 5	Rev-mediated Nuclear Export of HIV RNA	22/36	17.6752	2.76178e-14	NDC1;RANBP1;NUP205;NUP107;SEH1L;NUP155;NUP160;NUP93;XPO1;NUP42;NUP85;NUP50;NUP62;RCC1;NUP35;NUP43;NUP88;NUP54;NUP98;RAE1;NUP58;NUP37	Reactome_Pathways_2024
Module 5	Extension of Telomeres	26/51	11.7195	3.1913e-14	PIF1;PRIM2;FEN1;BLM;PCNA;DSCC1;PRIM1;CHTF18;POLD3;POLD1;PPP6R3;RFC5;RFC3;ACD;RFC4;LIG1;RFC2;RPA1;RPA2;CCNA2;POLA1;POLA2;RPA3;CDK2;DNA2;WRAP53	Reactome_Pathways_2024
Module 5	Regulation of PLK1 Activity at G2 M Transition	34/87	7.25366	4.02615e-14	CCP110;AURKA;CCNB2;CCNB1;HAUS8;CNTRL;CEP72;NEK2;CEP192;CEP76;CDK5RAP2;CEP78;PLK4;BORA;CEP135;ODF2;CEP152;NDE1;PLK1;HAUS3;HAUS6;HAUS5;TUBG1;TUBB4B;CKAP5;HAUS2;HAUS1;NEDD1;CENPJ;ALMS1;CDK1;CEP41;SFI1;CEP43	Reactome_Pathways_2024
Module 5	DNA Mismatch Repair WP531	18/23	40.413	4.62793e-14	RFC5;RFC3;PCNA;RFC4;LIG1;RFC2;RPA1;RPA2;MLH1;MSH6;POLD3;MSH2;EXO1;POLE2;POLD1;RPA3;POLE3;POLE	WikiPathways_2024_Human
Module 5	Nucleotide Excision Repair In Xeroderma Pigmentosum WP5114	32/75	8.40884	4.79637e-14	PCNA;BRCA1;POLD3;POLD1;H4C1;H4C4;H4C3;POLE;H4C6;H4C5;H3-3B;RFC5;H4C8;RFC3;RFC4;H4C9;PARP1;LIG1;RFC2;RPA1;XRCC1;RPA2;RAD23A;H4C16;ERCC3;H4C13;POLE2;RPA3;H4C12;POLE3;H4C11;RAD18	WikiPathways_2024_Human
Module 5	DNA Damage Telomere Stress Induced Senescence	28/60	9.86853	4.8539e-14	RB1;MRE11;H2AC18;LMNB1;H2AC14;H2BC26;KAT5;H2BC21;H4C1;H2BC9;ACD;H2BC5;H2AC4;H2BC3;H2BC4;H2BC17;H1-3;H1-2;CCNA2;H1-5;H2BC13;H1-4;H2BC14;H2BC15;CCNE2;H2AC20;H2BC11;CDK2	Reactome_Pathways_2024
Module 5	Loss of Nlp From Mitotic Centrosomes	30/69	8.68301	5.36847e-14	CCP110;HAUS8;CNTRL;CEP72;NEK2;CEP192;CEP76;CDK5RAP2;CEP78;PLK4;CEP135;ODF2;CEP152;NDE1;PLK1;HAUS3;HAUS6;HAUS5;TUBG1;TUBB4B;CKAP5;HAUS2;HAUS1;NEDD1;CENPJ;ALMS1;CDK1;CEP41;SFI1;CEP43	Reactome_Pathways_2024
Module 5	Loss of Proteins Required for Interphase Microtubule Organization From the Centrosome	30/69	8.68301	5.36847e-14	CCP110;HAUS8;CNTRL;CEP72;NEK2;CEP192;CEP76;CDK5RAP2;CEP78;PLK4;CEP135;ODF2;CEP152;NDE1;PLK1;HAUS3;HAUS6;HAUS5;TUBG1;TUBB4B;CKAP5;HAUS2;HAUS1;NEDD1;CENPJ;ALMS1;CDK1;CEP41;SFI1;CEP43	Reactome_Pathways_2024
Module 5	Transport of Mature Transcript to Cytoplasm	33/83	7.45935	5.42076e-14	SLBP;NUP205;NUP107;SEH1L;EIF4A3;U2AF1;CASC3;NUP160;GLE1;NUP42;NUP85;MAGOH;NUP62;NUP43;NUP88;RAE1;NDC1;CPSF4;NUP155;CPSF3;THOC3;MAGOHB;NUP93;DDX39A;NUP50;SARNP;NUP35;NUP54;RNPS1;NUP98;SRSF6;NUP58;NUP37	Reactome_Pathways_2024
Module 5	Telomere C-strand (Lagging Strand) Synthesis	21/34	18.1595	8.25331e-14	RFC5;PRIM2;BLM;FEN1;ACD;RFC3;PCNA;RFC4;LIG1;RFC2;DSCC1;PRIM1;RPA1;RPA2;CHTF18;POLD3;POLA1;POLA2;POLD1;RPA3;DNA2	Reactome_Pathways_2024
Module 5	Recruitment of NuMA to Mitotic Centrosomes	35/94	6.70959	8.43042e-14	CCP110;TUBA1C;HAUS8;CNTRL;CEP72;NEK2;CEP192;CEP76;CDK5RAP2;CEP78;PLK4;CEP135;ODF2;CEP152;NDE1;PLK1;HAUS3;HAUS6;HAUS5;TUBG1;TUBB4B;CKAP5;HAUS2;MZT1;HAUS1;NEDD1;CENPJ;ALMS1;CDK1;TUBGCP5;TUBGCP3;CEP41;SFI1;CEP43;TUBA8	Reactome_Pathways_2024
Module 5	Nuclear Envelope Breakdown	26/53	10.8502	9.67774e-14	NUP205;NUP107;SEH1L;NUP160;LMNB1;CCNB2;CCNB1;NUP42;NUP85;NUP62;NUP43;NUP88;RAE1;TMPO;NDC1;NUP155;PLK1;VRK1;NUP93;NUP50;CDK1;NUP35;NUP54;NUP98;NUP58;NUP37	Reactome_Pathways_2024
Module 5	Cellular Senescence	48/167	4.58409	1.0521e-13	RB1;MRE11;ETS2;H2AC18;LMNB1;MAPK9;FZR1;CDC23;H2AC14;H2BC26;KAT5;RBBP4;H2BC21;RPS6KA1;E2F1;E2F2;H4C1;RBBP7;H2BC9;SUZ12;MAP2K4;ACD;CDKN2C;H2BC5;UBE2C;EED;H2AC4;CBX2;H2BC3;H2BC4;H2BC17;H1-3;H1-2;H1-5;CCNA2;H1-4;H2BC13;H2BC14;H2BC15;TFDP1;CCNE2;UBE2S;H2AC20;CDK2;H2BC11;ANAPC4;MAPKAPK5;EZH2	Reactome_Pathways_2024
Module 5	Interactions of Rev With Host Cellular Proteins	22/38	15.4641	1.19432e-13	NDC1;RANBP1;NUP205;NUP107;SEH1L;NUP155;NUP160;NUP93;XPO1;NUP42;NUP85;NUP50;NUP62;RCC1;NUP35;NUP43;NUP88;NUP54;NUP98;RAE1;NUP58;NUP37	Reactome_Pathways_2024
Module 5	Resolution of Abasic Sites (AP Sites)	22/38	15.4641	1.19432e-13	RFC5;FEN1;RFC3;PARG;PCNA;RFC4;LIG1;PARP1;PARP2;RFC2;RPA1;RPA2;XRCC1;UNG;POLD3;NTHL1;POLD1;POLE2;RPA3;POLE3;POLE;MUTYH	Reactome_Pathways_2024
Module 5	Resolution of AP Sites via the Multiple-Nucleotide Patch Replacement Pathway	18/25	28.8633	1.19466e-13	RFC5;FEN1;RFC3;PARG;PCNA;RFC4;LIG1;PARP1;PARP2;RFC2;RPA1;RPA2;POLD3;POLD1;POLE2;RPA3;POLE3;POLE	Reactome_Pathways_2024
Module 5	Assembly of the Pre-Replicative Complex	36/101	6.26607	1.57957e-13	MCM7;MCM8;GMNN;H2AC18;ORC5;FZR1;CDC23;H2AC14;ORC6;H2BC26;ORC1;ORC3;H2BC21;ORC2;H4C1;H2BC9;CDT1;H2BC5;UBE2C;H2AC4;H2BC3;H2BC4;CDC6;H2BC17;H2BC13;H2BC14;H2BC15;UBE2S;H2AC20;H2BC11;MCM3;ANAPC4;MCM4;MCM5;MCM6;MCM2	Reactome_Pathways_2024
Module 5	SUMOylation of SUMOylation Proteins	21/35	16.8614	1.74093e-13	NDC1;NUP205;NUP107;SEH1L;UBE2I;NUP155;NUP160;NUP93;NUP42;NUP85;NUP50;NUP62;SUMO2;NUP35;NUP43;NUP88;NUP54;NUP98;RAE1;NUP58;NUP37	Reactome_Pathways_2024
Module 5	Homologous recombination	23/41	14.3779	2.01487e-13	BARD1;BLM;MRE11;XRCC2;TOP3A;XRCC3;RPA1;RPA2;BRCA1;BRCA2;PALB2;RAD54B;POLD3;RAD51B;BRIP1;RAD51;RAD51C;EME1;POLD1;RPA3;RBBP8;RAD54L;TOPBP1	KEGG_2021_Human
Module 5	Intracellular Membraneless Organelle (GO:0043232)	190/1310	1.99905	2.14991e-13	DYNC2I2;POP7;EIF4A3;HJURP;BUB1B;NUCKS1;AUP1;RBPJ;TTF1;MKI67;CDC20;GLE1;RDM1;LIPE;PPP1CC;FBL;KAT5;CSPP1;RCC1;FBXO5;RPS10;CDK5RAP2;TMOD4;NGDN;WDR74;SPICE1;DNTTIP2;WDR75;VRK1;ZBTB33;ESCO2;HASPIN;PIMREG;ILF2;TRAIP;BSCL2;PRR19;FANCD2;KIF16B;GEMIN4;KIF20A;KIF20B;RHNO1;SLBP;BLM;CDCA2;CDCA5;CDCA8;NCAPG;NOLC1;HMMR;PKMYT1;RPF1;RAD51AP1;SYCE2;DSN1;RACGAP1;ERI1;OARD1;RAD21;FAM83D;ZC3H14;SAC3D1;PLK4;CRADD;XRC…	GO_Cellular_Component_2025
Module 5	Interstrand Cross-Link Repair (GO:0036297)	23/39	16.1769	2.62202e-13	DCLRE1B;FANCI;DCLRE1A;CENPX;FANCM;MCM8;FANCL;XRCC3;RNF8;FANCA;FAAP24;NUCKS1;FANCC;FANCB;FANCE;FANCG;RAD51AP1;NEIL3;RAD51;FANCD2;FIRRM;RFWD3;HROB	GO_Biological_Process_2025
Module 5	NF1 Copy Number Variation Syndrome WP5366	37/104	6.25107	2.75693e-13	DNMT1;PCNA;H3C13;H3C11;H3C12;H3C1;USP1;H3C10;H3C3;H4C1;H3C2;RBBP7;H4C4;H4C3;H4C6;H3C7;H4C5;H3C6;H4C8;RFC5;SUZ12;H3C8;RFC3;H4C9;RFC4;ATAD5;RFC2;EED;CCNA2;H4C16;RAD51;CCNE2;H4C13;H4C12;H4C11;BCL2;RAD9A	WikiPathways_2024_Human
Module 5	Transport of Mature mRNA Derived From an Intron-Containing Transcript	30/74	7.6942	4.68045e-13	NUP205;NUP107;SEH1L;EIF4A3;U2AF1;CASC3;NUP160;GLE1;NUP42;NUP85;MAGOH;NUP62;NUP43;NUP88;RAE1;NDC1;NUP155;THOC3;MAGOHB;NUP93;DDX39A;NUP50;SARNP;NUP35;NUP54;RNPS1;NUP98;SRSF6;NUP58;NUP37	Reactome_Pathways_2024
Module 5	Nucleosome Assembly (GO:0006334)	27/56	10.4958	7.27093e-13	H2AX;HMGB2;CHAF1B;CHAF1A;SART3;CHRAC1;H3C13;RBBP4;H2BC21;H3C7;H3-3B;H2BC9;H2BC3;ATAD2;H2BC4;SSRP1;H2BC17;NAP1L4;H2BC13;H2BC14;H2BC15;NASP;H2BC11;HAT1;POLE3;DNAJC9;ASF1B	GO_Biological_Process_2025
Module 5	Assembly of the ORC Complex at the Origin of Replication	21/37	14.7521	8.04687e-13	H2BC9;H2BC5;H2AC4;H2BC3;H2BC4;H2BC17;H2AC18;ORC5;H2BC13;H2BC14;H2AC14;H2BC26;ORC6;H2BC15;ORC1;H2BC21;ORC3;H2AC20;ORC2;H2BC11;H4C1	Reactome_Pathways_2024
Module 5	Gene Silencing by RNA	41/134	4.99559	8.77957e-13	TDRKH;NUP205;NUP107;SEH1L;NUP160;H2AC18;H2AC14;H2BC26;NUP85;NUP42;POLR2B;H2BC21;NUP62;NUP88;NUP43;H4C1;POLR2H;POLR2I;MYBL1;RAE1;POLR2K;NDC1;H2BC9;NUP155;H2BC5;H2AC4;H2BC3;H2BC4;H2BC17;NUP93;H2BC13;H2BC14;H2BC15;H2AC20;NUP50;H2BC11;NUP35;NUP54;NUP98;NUP58;NUP37	Reactome_Pathways_2024
Module 5	Polo-like Kinase Mediated Events	14/16	78.4017	9.33539e-13	LIN54;PLK1;LIN9;CDC25C;FOXM1;PKMYT1;CDC25A;CCNB2;CCNB1;CENPF;WEE1;RBBP4;MYBL2;LIN52	Reactome_Pathways_2024
Module 5	Regulation of Endogenous Retroelements by KRAB-ZFP Proteins	30/76	7.35887	1.0504e-12	HDAC2;ZNF273;H2AC18;H2AC14;H2BC26;RBBP4;H2BC21;ZNF649;SUMO2;ZNF669;H4C1;RBBP7;H2BC9;ZNF680;UBE2I;ZNF141;H2BC5;H2AC4;H2BC3;H2BC4;H2BC17;H2BC13;H2BC14;H2BC15;ZNF519;ZNF93;H2AC20;H2BC11;ZNF30;ZNF257	Reactome_Pathways_2024
Module 5	Microtubule Cytoskeleton (GO:0015630)	80/393	2.93231	1.17044e-12	MAST2;PINX1;KIF14;BUB1B;KIF11;PQBP1;KIF15;CDC20;CRHBP;TUBA1C;RASSF1;NUDCD2;CSPP1;KIF21A;FBXO5;DNM1L;GTSE1;CDK5RAP2;GAS2L3;CKAP2L;LRRIQ1;SPICE1;CKAP2;HAUS3;KIF24;KIF23;KIF22;HASPIN;TUBG1;CCSAP;CKAP5;DNM3;PSRC1;KIF2A;INCENP;KIFC1;KIF16B;BIRC5;KIF2C;RELL1;KIF20A;KIF20B;ARL6;UHRF1;SPESP1;ZBTB49;CDCA8;TUBD1;TTK;HMMR;SKA1;AURKB;AURKA;CCNB2;ARL13B;RACGAP1;TAF1A;FAM83D;SAC3D1;CCT5;ODF2;CCDC14;PLK1;CBX1;S…	GO_Cellular_Component_2025
Module 5	Chromosome (GO:0005694)	49/179	4.28371	1.17044e-12	TOP2A;BRME1;PINX1;HMGB2;BRCA1;CTCF;HMGB1;MKI67;CHD1;H1-10;RCC1;KMT5A;TOPBP1;RMI2;RMI1;TOP3A;TWNK;DNTTIP2;ESCO2;CIP2A;FANCD2;PRR19;BIRC5;RHNO1;BLM;CDCA2;CDCA5;NOL7;NCAPG;RAD51AP1;RECQL4;SYCE2;FIGNL1;RAD21;EXOSC9;EXOSC8;XRCC4;KRR1;FANCE;MLH1;H1-5;RAD51;CENPH;SHLD3;SHLD2;INTS7;NCAPD2;TRIP13;EZH2	GO_Cellular_Component_2025
Module 5	Unwinding of DNA	12/12	220176	1.32857e-12	GINS1;GINS2;CDC45;MCM7;MCM8;GINS3;GINS4;MCM3;MCM4;MCM5;MCM6;MCM2	Reactome_Pathways_2024
Module 5	SUMOylation of DNA Damage Response and Repair Proteins	30/77	7.2019	1.55455e-12	BLM;NUP205;NUP107;SEH1L;BRCA1;NUP160;NUP42;NUP85;RAD21;NUP62;SUMO2;NUP43;NUP88;RAE1;NDC1;UBE2I;PARP1;NUP155;XRCC4;CBX2;RPA1;NUP93;STAG1;NSMCE4A;NUP50;NUP35;NUP54;NUP98;NUP58;NUP37	Reactome_Pathways_2024
Module 5	Mitotic Spindle Organization (GO:0007052)	34/90	6.86394	1.63994e-12	GPSM2;UHRF1;CDCA8;TTK;KIF11;WDR62;AURKB;KIF15;AURKA;FAM110A;CCNB1;CHEK2;NUF2;STMN1;RCC1;CEP192;DLGAP5;STIL;PLK1;SPICE1;KIF23;TUBG1;CKAP5;MZT1;NDC80;TPX2;KIF2A;CENPH;INCENP;KIFC1;PRC1;KIF4A;BIRC5;SPC25	GO_Biological_Process_2025
Module 5	protein-DNA Complex Assembly (GO:0065004)	28/62	9.28702	1.63994e-12	H2AX;HMGB2;CHAF1B;CHAF1A;SART3;CHRAC1;H3C13;RBBP4;H2BC21;H3C7;H3-3B;H2BC9;H2BC3;ATAD2;H2BC4;SSRP1;H2BC17;NAP1L4;H2BC13;H2BC14;H2BC15;RAD51;NASP;H2BC11;HAT1;POLE3;DNAJC9;ASF1B	GO_Biological_Process_2025
Module 5	NS1 Mediated Effects on Host Pathways	22/42	12.3686	1.77995e-12	NDC1;CPSF4;NUP205;NUP107;SEH1L;NUP155;NUP160;NUP93;PABPN1;NUP42;NUP85;NUP50;NUP62;NUP35;NUP43;NUP88;NUP54;NUP98;KPNA2;RAE1;NUP58;NUP37	Reactome_Pathways_2024
Module 5	tRNA Processing in the Nucleus	26/59	8.87454	2.0439e-12	NUP205;NUP107;POP7;SEH1L;RPP30;CSTF2;ZBTB8OS;NUP160;CLP1;NUP42;NUP85;NUP62;NUP43;NUP88;RAE1;NDC1;CPSF4;NUP155;NUP93;NUP50;NUP35;NUP54;NUP98;RPP25;NUP58;NUP37	Reactome_Pathways_2024
Module 5	Meiotic Synapsis	26/59	8.87454	2.0439e-12	SYCP2;BRCA1;H2AC18;LMNB1;SYCE2;H2AC14;H2BC26;H2BC21;RAD21;H4C1;H2BC9;ACD;UBE2I;H2BC5;H2AC4;H2BC3;H2BC4;HSPA2;H2BC17;H2BC13;H2BC14;STAG1;H2BC15;STAG3;H2AC20;H2BC11	Reactome_Pathways_2024
Module 5	Spindle Microtubule (GO:0005876)	29/71	7.78796	2.45899e-12	ZWILCH;KIF11;SKA3;TTL;AURKB;SKA1;AURKA;SKA2;FAM110A;HAUS8;CHMP1B;KNTC1;CEP295;PLK1;HAUS3;HAUS6;HAUS5;TUBG1;HAUS2;HAUS1;KIF18A;PSRC1;KIF18B;FAM161A;KIF2A;PRC1;KIF4A;CDK1;BIRC5	GO_Cellular_Component_2025
Module 5	Nuclear Import of Rev Protein	20/35	14.9779	2.46944e-12	NDC1;NUP205;NUP107;SEH1L;NUP155;NUP160;NUP93;NUP42;NUP85;NUP50;NUP62;RCC1;NUP35;NUP43;NUP88;NUP54;NUP98;RAE1;NUP58;NUP37	Reactome_Pathways_2024
Module 5	Nucleosome Organization (GO:0034728)	31/77	7.60886	2.84417e-12	H2AX;LIN54;SMARCD1;HMGB2;CHD1;CHAF1B;CHAF1A;SART3;CHRAC1;H3C13;RBBP4;H2BC21;H3C7;H3-3B;H2BC9;H2BC3;ATAD2;H2BC4;SSRP1;H2BC17;NAP1L4;H2BC13;H2BC14;H2BC15;H2AC25;NASP;H2BC11;HAT1;POLE3;DNAJC9;ASF1B	GO_Biological_Process_2025
Module 5	Transport of Mature mRNAs Derived From Intronless Transcripts	22/43	11.779	3.23172e-12	NDC1;SLBP;CPSF4;NUP205;NUP107;SEH1L;NUP155;CPSF3;NUP160;NUP93;NUP42;NUP85;NUP50;NUP62;NUP35;NUP43;NUP88;NUP54;NUP98;RAE1;NUP58;NUP37	Reactome_Pathways_2024
Module 5	HDACs Deacetylate Histones	26/60	8.61305	3.23172e-12	HDAC2;HDAC3;H2AC18;H2AC11;H2AC12;H2AC14;H2BC26;RBBP4;H2BC21;H4C1;RBBP7;H2BC9;H2BC5;H2AC4;H2BC3;H2BC4;H2BC17;H2BC18;SAP30;H2BC13;H2BC14;H2BC15;H2AC25;H2AC20;H2BC11;H2AC21	Reactome_Pathways_2024
Module 5	Metabolism of RNA	123/761	2.23303	3.31338e-12	TCERG1;NUP107;POP7;RPP30;EIF4A3;GPATCH1;CASC3;THUMPD1;GLE1;PNN;FBL;CLP1;MAGOH;RPS10;METTL3;WDR75;THOC3;CDKAL1;WBP11;NUP93;PRPF4;DDX39A;SARNP;PRPF3;GEMIN4;SNRPE;GEMIN6;PPIH;NUP98;SRSF6;RPP25;SNRPB;SLBP;NUP205;SEH1L;ANP32A;CSTF2;CWF19L2;OSGEP;NUP160;NUP85;ERI1;DHX35;CSTF1;NUP88;RPL39L;CPSF4;CPSF7;CPSF6;PNPT1;NUP155;CPSF3;MTERF4;MAGOHB;LSM5;LSM3;LSM2;HNRNPL;RCL1;CNOT7;LSM6;HNRNPF;TRMT13;RNPS1;TRMT11…	Reactome_Pathways_2024
Module 5	Metaphase Chromosome Alignment (GO:0051310)	26/55	10.1008	3.40776e-12	SEH1L;CDCA5;GMNN;PINX1;KIF14;CDCA8;SKA3;SKA1;SKA2;CCNB1;CDC23;CHMP1B;NUP62;SPDL1;FAM83D;CEP55;SPICE1;KIF22;NDC80;CENPF;KIF18A;PSRC1;INCENP;KIFC1;KIF2C;CENPQ	GO_Biological_Process_2025
Module 5	Negative Regulation of Mitotic Metaphase/Anaphase Transition (GO:0045841)	19/29	21.3363	3.59085e-12	ZWILCH;PLK1;BUB1B;TTK;HASPIN;NDC80;ZWINT;CDC20;CENPF;NUF2;BIRC5;KNTC1;BUB3;FBXO5;TRIP13;BUB1;SPC24;MAD2L1;SPC25	GO_Biological_Process_2025
Module 5	Defective TPR May Confer Susceptibility Towards Thyroid Papillary Carcinoma (TPC)	19/32	16.4099	3.63405e-12	NDC1;NUP205;NUP107;SEH1L;NUP155;NUP160;NUP93;NUP42;NUP85;NUP50;NUP62;NUP35;NUP43;NUP88;NUP54;NUP98;RAE1;NUP58;NUP37	Reactome_Pathways_2024
Module 5	Regulation of Glucokinase by Glucokinase Regulatory Protein	19/32	16.4099	3.63405e-12	NDC1;NUP205;NUP107;SEH1L;NUP155;NUP160;NUP93;NUP42;NUP85;NUP50;NUP62;NUP35;NUP43;NUP88;NUP54;NUP98;RAE1;NUP58;NUP37	Reactome_Pathways_2024
Module 5	Transport of the SLBP Dependant Mature mRNA	20/36	14.0411	4.84808e-12	NDC1;SLBP;NUP205;NUP107;SEH1L;NUP155;NUP160;NUP93;NUP42;NUP85;NUP50;NUP62;NUP35;NUP43;NUP88;NUP54;NUP98;RAE1;NUP58;NUP37	Reactome_Pathways_2024
Module 5	Mitotic Metaphase Chromosome Alignment (GO:0007080)	26/56	9.76359	5.30529e-12	SEH1L;CDCA5;PINX1;MIS12;KIF14;CDCA8;TTK;SKA3;AURKB;SKA1;CENPC;SKA2;CCNB1;CDC23;CHMP1B;NUF2;NUP62;SPDL1;CEP55;CDT1;KIF22;NDC80;KIF18A;PSRC1;KIFC1;KIF2C	GO_Biological_Process_2025
Module 5	Activation of HOX Genes During Differentiation	32/91	6.12312	5.98535e-12	HDAC3;PAXIP1;ASH2L;CTCF;H2AC18;PAGR1;H2AC14;H2BC26;RBBP4;POLR2B;RBBP5;H2BC21;WDR5;H4C1;POLR2H;RBBP7;POLR2I;POLR2K;H2BC9;SUZ12;H2BC5;EED;H2AC4;H2BC3;H2BC4;H2BC17;H2BC13;H2BC14;H2BC15;H2AC20;H2BC11;EZH2	Reactome_Pathways_2024
Module 5	Activation of Anterior HOX Genes in Hindbrain Development During Early Embryogenesis	32/91	6.12312	5.98535e-12	HDAC3;PAXIP1;ASH2L;CTCF;H2AC18;PAGR1;H2AC14;H2BC26;RBBP4;POLR2B;RBBP5;H2BC21;WDR5;H4C1;POLR2H;RBBP7;POLR2I;POLR2K;H2BC9;SUZ12;H2BC5;EED;H2AC4;H2BC3;H2BC4;H2BC17;H2BC13;H2BC14;H2BC15;H2AC20;H2BC11;EZH2	Reactome_Pathways_2024
Module 5	Regulation of TP53 Activity	44/160	4.30074	6.02016e-12	BLM;HDAC2;MRE11;SETD9;BRCA1;AURKB;AURKA;BRIP1;KAT5;RBBP4;EXO1;CHEK2;CHEK1;RBBP8;KMT5A;TOPBP1;RBBP7;ATRIP;BARD1;RFC5;RFC3;RMI2;RFC4;TBP;RFC2;RMI1;TOP3A;RPA1;RPA2;SSRP1;CCNA2;TPX2;CDK5;RPA3;CDK2;CDK1;TAF4B;MAPKAPK5;DNA2;TAF5;RAD9B;TAF3;RHNO1;RAD9A	Reactome_Pathways_2024
Module 5	HCMV Early Events	51/205	3.76345	6.24825e-12	NUP107;H2AC18;H2AC11;H2AC12;TUBA1C;H2AC14;H2BC26;H2BC21;NUP62;H4C1;NDC1;EED;H2AC4;H2BC17;H2BC18;NUP93;H2BC13;H2BC14;H2BC15;NUP50;H2BC11;NUP54;NUP98;NUP58;NUP205;SEH1L;HDAC3;NUP160;RBBP4;NUP85;NUP42;NUP88;NUP43;RBBP7;RAE1;H2BC9;SUZ12;DUT;H2BC5;NUP155;H2BC3;H2BC4;CBX1;TUBB4B;H2AC25;H2AC20;H2AC21;NUP35;EZH2;TUBA8;NUP37	Reactome_Pathways_2024
Module 5	NoRC Negatively Regulates rRNA Expression	29/76	6.95755	6.50757e-12	DNMT1;HDAC2;TTF1;H2AC18;H2AC14;H2BC26;H2BC21;SAP130;TAF1A;DNMT3B;H4C1;POLR2H;POLR2K;H2BC9;SAP30BP;TBP;H2BC5;H2AC4;H2BC3;H2BC4;H2BC17;SAP30;H2BC13;H2BC14;H2BC15;ERCC3;H2AC20;H2BC11;POLR1C	Reactome_Pathways_2024
Module 5	DNA Methylation	19/33	15.2369	7.42976e-12	H2BC9;DNMT1;H2BC5;UHRF1;H2AC4;H2BC3;H2BC4;H2BC17;H2AC18;H2BC13;H2BC14;H2AC14;H2BC26;H2BC15;H2BC21;H2AC20;H2BC11;DNMT3B;H4C1	Reactome_Pathways_2024
Module 5	HATs Acetylate Histones	35/108	5.41867	7.46947e-12	YEATS4;H2AC18;H2AC11;H2AC12;H2AC14;H2BC26;ING3;KAT5;H2BC21;SAP130;WDR5;H4C1;BRD8;RBBP7;KAT14;H2BC9;H2BC5;H2AC4;H2BC3;ACTL6A;H2BC4;ELP4;ELP5;H2BC17;ELP6;H2BC18;H2BC13;H2BC14;H2AC25;MRGBP;H2BC15;H2AC20;HAT1;H2AC21;H2BC11	Reactome_Pathways_2024
Module 5	Processive Synthesis on the Lagging Strand	13/15	72.7572	8.21005e-12	PRIM2;FEN1;PCNA;LIG1;PRIM1;RPA1;RPA2;POLD3;POLA1;POLA2;POLD1;RPA3;DNA2	Reactome_Pathways_2024
Module 5	Viral Messenger RNA Synthesis	23/49	9.94962	8.59283e-12	NDC1;NUP205;NUP107;SEH1L;NUP155;NUP160;NUP93;NUP42;NUP85;POLR2B;NUP50;NUP62;NUP35;NUP54;NUP43;NUP88;NUP98;POLR2H;POLR2I;RAE1;NUP58;POLR2K;NUP37	Reactome_Pathways_2024
Module 5	Negative Epigenetic Regulation of rRNA Expression	30/82	6.50764	9.05757e-12	DNMT1;HDAC2;SUV39H1;TTF1;H2AC18;H2AC14;H2BC26;H2BC21;SAP130;TAF1A;DNMT3B;H4C1;POLR2H;POLR2K;H2BC9;SAP30BP;TBP;H2BC5;H2AC4;H2BC3;H2BC4;H2BC17;SAP30;H2BC13;H2BC14;H2BC15;ERCC3;H2AC20;H2BC11;POLR1C	Reactome_Pathways_2024
Module 5	Nuclear Lumen (GO:0031981)	129/814	2.18406	9.26648e-12	DYNC2I2;POP7;EIF4A3;HJURP;NUCKS1;RBPJ;TTF1;MKI67;GLE1;RDM1;PPP1CC;FBL;KAT5;RPS10;NGDN;WDR74;DNTTIP2;WDR75;VRK1;ZBTB33;PIMREG;ILF2;TRAIP;FANCD2;GEMIN4;KIF20B;SLBP;BLM;CDCA8;NCAPG;NOLC1;PKMYT1;RPF1;DSN1;ERI1;OARD1;FIGNL1;ZC3H14;PLK4;CRADD;XRCC5;PYM1;XRCC1;CDC6;H1-5;ISG20;RCL1;POLA1;DIAPH2;LSM6;KIF18B;STK24;STAG3;ARTN;UBE2T;AIRIM;CEP85;KLLN;TOP2A;FEN1;MCM7;NVL;CDCA7L;SUV39H1;PINX1;HMGB2;MCM10;CTCF;T…	GO_Cellular_Component_2025
Module 5	Mitotic Spindle Assembly Checkpoint Signaling (GO:0007094)	18/27	22.4468	9.29855e-12	ZWILCH;PLK1;BUB1B;TTK;HASPIN;NDC80;ZWINT;CDC20;CENPF;NUF2;BIRC5;KNTC1;BUB3;TRIP13;BUB1;SPC24;MAD2L1;SPC25	GO_Biological_Process_2025
Module 5	Mitotic Spindle Checkpoint Signaling (GO:0071174)	18/27	22.4468	9.29855e-12	ZWILCH;PLK1;BUB1B;TTK;HASPIN;NDC80;ZWINT;CDC20;CENPF;NUF2;BIRC5;KNTC1;BUB3;TRIP13;BUB1;SPC24;MAD2L1;SPC25	GO_Biological_Process_2025
Module 5	Spindle Assembly Checkpoint Signaling (GO:0071173)	18/27	22.4468	9.29855e-12	ZWILCH;PLK1;BUB1B;TTK;HASPIN;NDC80;ZWINT;CDC20;CENPF;NUF2;BIRC5;KNTC1;BUB3;TRIP13;BUB1;SPC24;MAD2L1;SPC25	GO_Biological_Process_2025
Module 5	SUMOylation of Chromatin Organization Proteins	25/58	8.52797	9.45547e-12	HDAC2;NUP205;NUP107;SEH1L;NUP160;NUP42;NUP85;NUP62;SUMO2;NUP43;NUP88;H4C1;RAE1;NDC1;SUZ12;UBE2I;NUP155;CBX2;NUP93;NUP50;NUP35;NUP54;NUP98;NUP58;NUP37	Reactome_Pathways_2024
Module 5	Single-Stranded DNA Binding (GO:0003697)	35/97	6.38388	1.11753e-11	BLM;MCM7;MCM8;HMGB2;IGHMBP2;NUCKS1;MCM10;HMGB1;BRCA2;RAD51AP1;RECQL4;CDC45;RNF138;POLR2H;TOP3A;TWNK;RAD23A;WBP11;MLH1;RAD51B;FAM111A;POLA1;MMS22L;NEIL3;RAD51;MSH2;FUBP1;TDP1;RPA3;MCM3;MCM4;MCM5;ERCC5;MCM6;HROB	GO_Molecular_Function_2025
Module 5	SUMOylation	46/176	4.01393	1.22051e-11	TOP2A;BLM;DNMT1;NUP205;HDAC2;NUP107;SEH1L;PCNA;CDCA8;BRCA1;NUP160;AURKB;AURKA;NUP85;NUP42;RAD21;NUP62;SUMO2;DNMT3B;NUP88;NUP43;H4C1;RAE1;NDC1;SUZ12;CASP8AP2;UBE2I;NUP155;XRCC4;PARP1;CBX2;RPA1;SENP1;NUP93;STAG1;NSMCE4A;INCENP;NUP50;SP3;BIRC5;NUP35;NUP54;PPARG;NUP98;NUP58;NUP37	Reactome_Pathways_2024
Module 5	SUMO E3 Ligases SUMOylate Target Proteins	45/170	4.08231	1.31336e-11	TOP2A;BLM;DNMT1;NUP205;HDAC2;NUP107;SEH1L;PCNA;CDCA8;BRCA1;NUP160;AURKB;AURKA;NUP85;NUP42;RAD21;NUP62;SUMO2;DNMT3B;NUP88;NUP43;H4C1;RAE1;NDC1;SUZ12;CASP8AP2;UBE2I;NUP155;XRCC4;PARP1;CBX2;RPA1;NUP93;STAG1;NSMCE4A;INCENP;NUP50;SP3;BIRC5;NUP35;NUP54;PPARG;NUP98;NUP58;NUP37	Reactome_Pathways_2024
Module 5	G0 and Early G1	17/27	19.067	1.47305e-11	TOP2A;LIN54;PCNA;LIN9;CDC6;CDC25A;CCNA2;RBL1;TFDP1;RBBP4;CCNE2;CDK2;E2F1;CDK1;MYBL2;E2F4;LIN52	Reactome_Pathways_2024
Module 5	Postmitotic Nuclear Pore Complex (NPC) Reformation	17/27	19.067	1.47305e-11	NDC1;NUP205;NUP107;SEH1L;UBE2I;NUP155;NUP160;NUP93;NUP85;NUP62;RCC1;NUP35;NUP43;NUP54;NUP98;NUP58;NUP37	Reactome_Pathways_2024
Module 5	Nuclear Transport (GO:0051169)	21/38	13.8836	1.55828e-11	NDC1;NUP205;NUP107;SEH1L;ANP32A;NUP155;NUP160;GLE1;NUP93;XPO1;NUP42;NUP85;NUP50;NUP62;NUP35;NUP43;NUP88;NUP54;NUP98;NUP58;NUP37	GO_Biological_Process_2025
Module 5	NEP NS2 Interacts With the Cellular Export Machinery	20/38	12.4796	1.65659e-11	NDC1;NUP205;NUP107;SEH1L;NUP155;NUP160;NUP93;XPO1;NUP42;NUP85;NUP50;NUP62;NUP35;NUP43;NUP88;NUP54;NUP98;RAE1;NUP58;NUP37	Reactome_Pathways_2024
Module 5	Transport of Mature mRNA Derived From an Intronless Transcript	21/42	11.2367	1.68357e-11	NDC1;CPSF4;NUP205;NUP107;SEH1L;NUP155;CPSF3;NUP160;NUP93;NUP42;NUP85;NUP50;NUP62;NUP35;NUP43;NUP88;NUP54;NUP98;RAE1;NUP58;NUP37	Reactome_Pathways_2024
Module 5	Nucleolus (GO:0005730)	127/805	2.1704	1.72598e-11	DYNC2I2;POP7;EIF4A3;HJURP;NUCKS1;RBPJ;TTF1;MKI67;GLE1;RDM1;PPP1CC;FBL;KAT5;RPS10;NGDN;WDR74;DNTTIP2;WDR75;VRK1;ZBTB33;PIMREG;ILF2;TRAIP;FANCD2;GEMIN4;KIF20B;SLBP;BLM;CDCA8;NCAPG;NOLC1;PKMYT1;RPF1;DSN1;ERI1;OARD1;ZC3H14;PLK4;CRADD;XRCC5;PYM1;XRCC1;CDC6;H1-5;ISG20;RCL1;POLA1;DIAPH2;LSM6;KIF18B;STK24;STAG3;ARTN;UBE2T;AIRIM;CEP85;KLLN;TOP2A;FEN1;MCM7;NVL;CDCA7L;SUV39H1;PINX1;HMGB2;MCM10;CTCF;TENT4A;P…	GO_Cellular_Component_2025
Module 5	Condensed Chromosome (GO:0000793)	26/62	8.13366	1.72598e-11	SYCP2;SUV39H1;NCAPG2;HMGB2;NCAPG;CTCF;HMGB1;MKI67;SMC4;CENPA;NCAPH;CENPC;CHEK1;RCC1;SLF1;SLF2;XRCC4;NCAPH2;TUBG1;SGO1;NSMCE4A;RAD51;FANCD2;NCAPD2;RGS12;NCAPD3	GO_Cellular_Component_2025
Module 5	PCNA-Dependent Long Patch Base Excision Repair	15/21	28.0116	1.90891e-11	RFC5;FEN1;RFC3;PCNA;RFC4;LIG1;RFC2;RPA1;RPA2;POLD3;POLD1;POLE2;RPA3;POLE3;POLE	Reactome_Pathways_2024
Module 5	Nonhomologous End-Joining (NHEJ)	23/51	9.23792	2.27483e-11	BARD1;H2BC9;MRE11;PAXIP1;RIF1;H2BC5;XRCC4;XRCC5;H2BC3;H2BC4;RNF8;BRCA1;H2BC17;H2BC13;H2BC14;H2BC26;H2BC15;KAT5;H2BC21;TDP1;H2BC11;NSD2;H4C1	Reactome_Pathways_2024
Module 5	Histone Modifications WP2369	27/66	7.80028	2.43944e-11	SUV39H2;SETD9;SUV39H1;H3C13;H3C11;H3C12;H3C1;H3C10;SMYD4;KMT5A;H4C1;H4C4;H4C3;H4C6;H3C7;H4C5;H3-3B;H3C6;H4C8;H3C8;H4C9;EED;H4C16;H4C13;H4C12;H4C11;EZH2	WikiPathways_2024_Human
Module 5	Positive Regulation of Mitotic Cell Cycle Phase Transition (GO:1901992)	27/64	8.22282	2.50571e-11	RB1;CDCA5;DBF4B;CDC20;CCNB1;CDC23;FBXO5;DLGAP5;RRM1;STIL;RRM2;UBE2C;CPSF3;RDX;CDC7;CDC25C;CDC25A;CDC25B;RAD51B;RAD51C;TFDP1;CCNE2;ESPL1;CDK1;SASS6;BIRC5;DTL	GO_Biological_Process_2025
Module 5	SUMOylation of RNA Binding Proteins	22/47	9.89217	2.66869e-11	NDC1;NUP205;NUP107;SEH1L;UBE2I;NUP155;CBX2;NUP160;NUP93;NUP42;NUP85;NUP50;NUP62;SUMO2;NUP35;NUP43;NUP88;NUP54;NUP98;RAE1;NUP58;NUP37	Reactome_Pathways_2024
Module 5	Transport of the SLBP Independent Mature mRNA	19/35	13.3308	2.77922e-11	NDC1;NUP205;NUP107;SEH1L;NUP155;NUP160;NUP93;NUP42;NUP85;NUP50;NUP62;NUP35;NUP43;NUP88;NUP54;NUP98;RAE1;NUP58;NUP37	Reactome_Pathways_2024
Module 5	Base-Excision Repair, AP Site Formation	21/43	10.7253	2.9209e-11	H2BC9;ACD;H2BC5;H2AC4;H2BC3;H2BC4;H2BC17;H2AC18;UNG;H2BC13;H2BC14;NEIL3;H2AC14;H2BC26;H2BC15;NTHL1;H2BC21;H2AC20;H2BC11;H4C1;MUTYH	Reactome_Pathways_2024
Module 5	Export of Viral Ribonucleoproteins From Nucleus	20/39	11.8221	2.95076e-11	NDC1;NUP205;NUP107;SEH1L;NUP155;NUP160;NUP93;XPO1;NUP42;NUP85;NUP50;NUP62;NUP35;NUP43;NUP88;NUP54;NUP98;RAE1;NUP58;NUP37	Reactome_Pathways_2024
Module 5	SUMOylation of Ubiquitinylation Proteins	20/39	11.8221	2.95076e-11	NDC1;NUP205;NUP107;SEH1L;UBE2I;NUP155;NUP160;NUP93;NUP42;NUP85;NUP50;NUP62;NUP35;NUP43;NUP88;NUP54;NUP98;RAE1;NUP58;NUP37	Reactome_Pathways_2024
Module 5	E2F Mediated Regulation of DNA Replication	15/22	24.0086	5.1564e-11	RB1;PRIM2;MCM8;PRIM1;ORC5;POLA1;CCNB1;POLA2;ORC6;TFDP1;ORC1;ORC3;ORC2;CDK1;E2F1	Reactome_Pathways_2024
Module 5	Cleavage of the Damaged Purine	19/36	12.546	5.1564e-11	H2BC9;ACD;H2BC5;H2AC4;H2BC3;H2BC4;H2BC17;H2AC18;H2BC13;H2BC14;NEIL3;H2AC14;H2BC26;H2BC15;H2BC21;H2AC20;H2BC11;H4C1;MUTYH	Reactome_Pathways_2024
Module 5	Depurination	19/36	12.546	5.1564e-11	H2BC9;ACD;H2BC5;H2AC4;H2BC3;H2BC4;H2BC17;H2AC18;H2BC13;H2BC14;NEIL3;H2AC14;H2BC26;H2BC15;H2BC21;H2AC20;H2BC11;H4C1;MUTYH	Reactome_Pathways_2024
Module 5	Recognition and Association of DNA Glycosylase With Site Containing an Affected Purine	19/36	12.546	5.1564e-11	H2BC9;ACD;H2BC5;H2AC4;H2BC3;H2BC4;H2BC17;H2AC18;H2BC13;H2BC14;NEIL3;H2AC14;H2BC26;H2BC15;H2BC21;H2AC20;H2BC11;H4C1;MUTYH	Reactome_Pathways_2024
Module 5	Replication Fork Processing (GO:0031297)	23/48	10.3482	5.37598e-11	BARD1;GEN1;BLM;MRE11;PCNA;CENPX;FANCM;PARP1;TONSL;DONSON;NUCKS1;BRCA1;BRCA2;TRAIP;FAM111A;MMS22L;RAD51;EME1;EXO1;RFWD3;RBBP8;TIMELESS;DNA2	GO_Biological_Process_2025
Module 5	Removal of the Flap Intermediate	12/14	67.1195	7.37827e-11	POLD3;PRIM2;POLA1;FEN1;POLA2;PCNA;PRIM1;POLD1;RPA3;RPA1;RPA2;DNA2	Reactome_Pathways_2024
Module 5	snRNP Assembly	23/54	8.34256	9.01079e-11	NDC1;NUP205;NUP107;SEH1L;NUP155;NUP160;NUP93;NUP42;NUP85;NUP50;NUP62;GEMIN4;NUP35;GEMIN6;NUP54;SNRPE;NUP43;NUP88;NUP98;RAE1;NUP58;SNRPB;NUP37	Reactome_Pathways_2024
Module 5	Metabolism of Non-Coding RNA	23/54	8.34256	9.01079e-11	NDC1;NUP205;NUP107;SEH1L;NUP155;NUP160;NUP93;NUP42;NUP85;NUP50;NUP62;GEMIN4;NUP35;GEMIN6;NUP54;SNRPE;NUP43;NUP88;NUP98;RAE1;NUP58;SNRPB;NUP37	Reactome_Pathways_2024
Module 5	Cleavage of the Damaged Pyrimidine	20/41	10.695	9.12831e-11	H2BC9;ACD;H2BC5;H2AC4;H2BC3;H2BC4;H2BC17;H2AC18;UNG;H2BC13;H2BC14;NEIL3;H2AC14;H2BC26;H2BC15;NTHL1;H2BC21;H2AC20;H2BC11;H4C1	Reactome_Pathways_2024
Module 5	Depyrimidination	20/41	10.695	9.12831e-11	H2BC9;ACD;H2BC5;H2AC4;H2BC3;H2BC4;H2BC17;H2AC18;UNG;H2BC13;H2BC14;NEIL3;H2AC14;H2BC26;H2BC15;NTHL1;H2BC21;H2AC20;H2BC11;H4C1	Reactome_Pathways_2024
Module 5	Recognition and Association of DNA Glycosylase With Site Containing an Affected Pyrimidine	20/41	10.695	9.12831e-11	H2BC9;ACD;H2BC5;H2AC4;H2BC3;H2BC4;H2BC17;H2AC18;UNG;H2BC13;H2BC14;NEIL3;H2AC14;H2BC26;H2BC15;NTHL1;H2BC21;H2AC20;H2BC11;H4C1	Reactome_Pathways_2024
Module 5	Transport of Ribonucleoproteins Into the Host Nucleus	19/37	11.8483	9.31009e-11	NDC1;NUP205;NUP107;SEH1L;NUP155;NUP160;NUP93;NUP42;NUP85;NUP50;NUP62;NUP35;NUP43;NUP88;NUP54;NUP98;RAE1;NUP58;NUP37	Reactome_Pathways_2024
Module 5	Microtubule Binding (GO:0008017)	57/243	3.48951	1.13651e-10	MAST2;CETN3;KIF14;KIF15;WDR90;NUF2;KIF21A;DNM1L;GTSE1;DLGAP5;CDK5RAP2;GAS2L3;CEP135;CEP295;VASH2;KIF23;HAUS6;KNL1;KIF22;KNSTRN;CCSAP;CKAP5;DNM3;EML6;PSRC1;KIF2A;FAM161A;CEP57L1;KIFC1;KIF16B;BIRC5;KIF2C;KIF20A;KIF20B;HDGFL3;SPATA4;SKA3;SKA1;SKA2;RACGAP1;HAUS8;FAM83D;SPAG5;NDE1;PLK1;CRIPT;NDC80;KIF18A;KIF18B;CDK5;REEP4;PRC1;TUBGCP5;TUBGCP3;CEP44;SPC24;METAP1	GO_Molecular_Function_2025
Module 5	Transcriptional Regulation by TP53	70/362	2.73609	1.30791e-10	MRE11;SETD9;BRCA1;PIDD1;KAT5;CASP6;EXO1;CHEK2;CHEK1;KMT5A;TOPBP1;RFC5;RMI2;RFC3;RFC4;TBP;RMI1;RFC2;TOP3A;CDC25C;CCNA2;RBL1;TFDP1;CCNE2;MSH2;FANCD2;BIRC5;MAPKAPK5;DNA2;RHNO1;BLM;HDAC2;PCNA;AURKB;AURKA;BRIP1;CCNB1;RBBP4;POLR2B;E2F1;RBBP8;E2F4;POLR2H;RBBP7;POLR2I;ATRIP;E2F7;POLR2K;E2F8;BARD1;FANCI;CRADD;RPA1;RPA2;FANCC;SSRP1;MLH1;TPX2;CNOT7;CDK5;ERCC3;CENPJ;RPA3;CDK2;CDK1;TAF4B;TAF5;RAD9B;TAF3;RAD9A	Reactome_Pathways_2024
Module 5	DNA Secondary Structure Binding (GO:0000217)	19/33	15.2369	1.44774e-10	GEN1;LIN54;BLM;FANCM;XRCC2;XRCC3;HMGB2;HMGB3;HMGB1;RAD51AP1;RECQL4;MSH6;RAD51B;NEIL3;RAD51C;MSH2;ERCC5;CLSPN;RAD18	GO_Molecular_Function_2025
Module 5	Nucleocytoplasmic Transport (GO:0006913)	23/50	9.58059	1.53829e-10	NDC1;NUP205;NUP107;SEH1L;UBE2I;ANP32A;NUP155;NUP160;GLE1;NUP93;XPO1;CDAN1;NUP42;NUP85;NUP50;NUP62;NUP35;NUP54;NUP43;NUP88;NUP98;NUP58;NUP37	GO_Biological_Process_2025
Module 5	Nuclear Envelope (NE) Reassembly	27/75	6.33462	1.58218e-10	NUP205;NUP107;SEH1L;NUP160;LMNB1;TUBA1C;CCNB2;CCNB1;NUP85;NUP62;RCC1;NUP43;LBR;TMPO;NDC1;UBE2I;NUP155;VRK1;TUBB4B;NUP93;CDK1;NUP35;NUP54;NUP98;NUP58;NUP37;TUBA8	Reactome_Pathways_2024
Module 5	Positive Epigenetic Regulation of rRNA Expression	27/75	6.33462	1.58218e-10	HDAC2;TTF1;H2AC18;H2AC14;H2BC26;RBBP4;H2BC21;TAF1A;H4C1;POLR2H;RBBP7;POLR2K;H2BC9;TBP;H2BC5;H2AC4;H2BC3;H2BC4;DEK;BAZ1B;H2BC17;H2BC13;H2BC14;H2BC15;H2AC20;H2BC11;POLR1C	Reactome_Pathways_2024
Module 5	Fanconi Anemia Pathway	19/38	11.2241	1.67212e-10	DCLRE1B;FANCI;DCLRE1A;FANCM;FANCL;FANCA;RPA1;FAAP24;RPA2;FANCC;FANCB;FANCE;FANCG;EME1;FANCD2;RPA3;UBE2T;USP1;ATRIP	Reactome_Pathways_2024
Module 5	Inhibition of DNA Recombination at Telomere	21/47	9.07329	2.22145e-10	H2BC9;ACD;H2BC5;H2AC4;H2BC3;H2BC4;H2BC17;H2AC18;H2BC13;H2BC14;H2AC14;H2BC26;H2BC15;POLR2B;H2BC21;H2AC20;H2BC11;H4C1;POLR2H;POLR2I;POLR2K	Reactome_Pathways_2024
Module 5	Regulation of Mitotic Cell Cycle (GO:0007346)	37/124	4.80878	2.79251e-10	RB1;BTG3;CDCA2;GMNN;MKI67;FBXO43;PKMYT1;TTL;CKS1B;AURKA;CDC20;CCNB1;FZR1;CDC23;RCC1;NEK2;PIM3;FBXO5;PIM2;DLGAP5;BORA;NHERF1;ANGEL2;PLK1;CDC25C;MASTL;CDC25B;TFAP4;ERCC3;RPS6KB1;CDK2;CKS2;ANAPC4;BIRC5;PKN2;KIF20B;MAD2L1	GO_Biological_Process_2025
Module 5	SIRT1 Negatively Regulates rRNA Expression	19/39	10.6623	2.9688e-10	H2BC9;TBP;H2BC5;SUV39H1;H2AC4;H2BC3;H2BC4;H2BC17;H2AC18;H2BC13;H2BC14;H2AC14;H2BC26;H2BC15;H2BC21;H2AC20;TAF1A;H2BC11;H4C1	Reactome_Pathways_2024
Module 5	Single-Stranded DNA Helicase Activity (GO:0017116)	15/21	28.0116	3.07586e-10	RFC5;PIF1;RFC3;RFC4;MCM7;MCM8;RFC2;DSCC1;WRNIP1;RAD51;MCM3;MCM4;MCM5;DNA2;MCM6	GO_Molecular_Function_2025
Module 5	Generic Transcription Pathway	167/1230	1.82863	4.88988e-10	RB1;MRE11;ITGA2B;YEATS4;RBPJ;H2AC18;CDC23;H2AC14;KAT5;ZNF726;CHEK2;CHEK1;ZNF724;KMT5A;H4C1;ZNF684;ZNF682;MED1;ZNF681;ZNF680;H2AC4;LMO2;CDC25C;MED6;MED7;ZNF718;MSH2;CCNE2;FANCD2;GPRIN1;ANAPC4;MAPKAPK5;ZNF678;DNA2;ZNF431;RHNO1;ZNF430;ZNF551;BLM;ZNF273;NOTCH4;BRIP1;CCNB1;ZNF669;ZNF701;ZKSCAN5;ZNF700;ZNF544;ATRIP;ZNF266;NR2C2AP;BARD1;FANCI;ZNF782;UBE2I;ZNF141;CRADD;AUTS2;UBE2C;CBX2;CDC7;NR1D2;FANCC;N…	Reactome_Pathways_2024
Module 5	Mismatch repair	15/23	21.0064	4.89197e-10	RFC5;RFC3;PCNA;RFC4;LIG1;RFC2;RPA1;RPA2;MLH1;MSH6;POLD3;MSH2;EXO1;POLD1;RPA3	KEGG_2021_Human
Module 5	Vpr-mediated Nuclear Import of PICs	19/40	10.1541	5.14969e-10	NDC1;NUP205;NUP107;SEH1L;NUP155;NUP160;NUP93;NUP42;NUP85;NUP50;NUP62;NUP35;NUP43;NUP88;NUP54;NUP98;RAE1;NUP58;NUP37	Reactome_Pathways_2024
Module 5	Packaging Of Telomere Ends	17/32	12.7079	5.37777e-10	H2BC9;ACD;H2BC5;H2AC4;H2BC3;H2BC4;H2BC17;H2AC18;H2BC13;H2BC14;H2AC14;H2BC26;H2BC15;H2BC21;H2AC20;H2BC11;H4C1	Reactome_Pathways_2024
Module 5	Gap-filling DNA Repair Synthesis and Ligation in GG-NER	15/25	16.8033	6.91309e-10	RFC5;RFC3;PCNA;RFC4;LIG1;RFC2;RPA1;RPA2;XRCC1;POLD3;POLD1;POLE2;RPA3;POLE3;POLE	Reactome_Pathways_2024
Module 5	ERCC6 (CSB) and EHMT2 (G9a) Positively Regulate rRNA Expression	20/45	8.98186	7.17175e-10	H2BC9;HDAC2;H2BC5;H2AC4;H2BC3;H2BC4;TTF1;H2BC17;H2AC18;H2BC13;H2BC14;H2AC14;H2BC26;H2BC15;RBBP4;H2BC21;H2AC20;H2BC11;H4C1;RBBP7	Reactome_Pathways_2024
Module 5	B-WICH Complex Positively Regulates rRNA Expression	23/59	7.18191	7.17175e-10	H2BC9;TBP;H2BC5;H2AC4;H2BC3;H2BC4;DEK;BAZ1B;H2BC17;H2AC18;H2BC13;H2BC14;H2AC14;H2BC26;H2BC15;H2BC21;H2AC20;H2BC11;POLR1C;TAF1A;H4C1;POLR2H;POLR2K	Reactome_Pathways_2024
Module 5	Epigenetic Regulation of Adipogenesis Genes by MLL3 and MLL4 Complexes	31/103	4.85431	9.53633e-10	RB1;PAXIP1;HDAC3;ASH2L;H2AC18;PAGR1;LIPE;H2AC14;H2BC26;RBBP5;H2BC21;WDR5;H4C1;H2BC9;MED1;H2BC5;H2AC4;H2BC3;H2BC4;H2BC17;MED6;MED7;H2BC13;H2BC14;H2BC15;CDK5;GPAM;H2AC20;H2BC11;PLIN2;PPARG	Reactome_Pathways_2024
Module 5	Epigenetic Regulation of Gene Expression by MLL3 and MLL4 Complexes	31/103	4.85431	9.53633e-10	RB1;PAXIP1;HDAC3;ASH2L;H2AC18;PAGR1;LIPE;H2AC14;H2BC26;RBBP5;H2BC21;WDR5;H4C1;H2BC9;MED1;H2BC5;H2AC4;H2BC3;H2BC4;H2BC17;MED6;MED7;H2BC13;H2BC14;H2BC15;CDK5;GPAM;H2AC20;H2BC11;PLIN2;PPARG	Reactome_Pathways_2024
Module 5	MLL4 and MLL3 Complexes Regulate Expression of PPARG Targets in Adipogenesis and Hepatic Steatosis	31/103	4.85431	9.53633e-10	RB1;PAXIP1;HDAC3;ASH2L;H2AC18;PAGR1;LIPE;H2AC14;H2BC26;RBBP5;H2BC21;WDR5;H4C1;H2BC9;MED1;H2BC5;H2AC4;H2BC3;H2BC4;H2BC17;MED6;MED7;H2BC13;H2BC14;H2BC15;CDK5;GPAM;H2AC20;H2BC11;PLIN2;PPARG	Reactome_Pathways_2024
Module 5	Gastric Cancer Network 1 WP2361	16/27	16.3032	1.10711e-09	TOP2A;NUP107;UBE2C;ACTL6A;LIN9;KIF15;AURKA;TPX2;CENPF;H4C16;MCM4;CEP192;MYBL2;ECT2;KIF20B;E2F7	WikiPathways_2024_Human
Module 5	Microtubule Cytoskeleton Organization Involved in Mitosis (GO:1902850)	24/59	7.71344	1.22044e-09	GPSM2;STIL;PLK1;TTK;KIF11;WDR62;TUBG1;CKAP5;AURKB;NDC80;FAM110A;CCNB1;ESPL1;KIF2A;CENPH;KIF4A;NUF2;STMN1;CDK1;TACC3;RCC1;BIRC5;DLGAP5;SPC25	GO_Biological_Process_2025
Module 5	Chromatin Organization (GO:0006325)	65/323	2.87181	1.34117e-09	RB1;H2AX;TOP2A;SUV39H2;SUV39H1;HMGB2;NUCKS1;YEATS4;BRCA1;CTCF;NUDT5;CHD1;CHAF1B;CHAF1A;SART3;VPS72;H2BC21;CHEK1;SMARCAD1;HMGN3;H3-3B;H2AC4;VRK1;BAZ1B;H2BC17;UCHL5;H2BC13;H2BC14;H2BC15;NSMCE4A;THAP7;HAT1;H2BC11;DNAJC9;ASF1B;SMARCD1;DNMT1;HDAC2;PAXIP1;HDAC3;RNF8;CHRAC1;HIRIP3;H3C13;RBBP4;RBBP7;H3C7;BARD1;H2BC9;H2AZ1;PCGF6;SLF1;SLF2;KDM4D;H2BC3;ATAD2;H2BC4;DEK;SSRP1;NAP1L4;H1-5;CDAN1;NASP;POLE3;EZH2	GO_Biological_Process_2025
Module 5	Mitotic Cell Cycle Phase Transition (GO:0044772)	34/113	4.85946	1.50354e-09	USP37;CCNF;CUL2;PKMYT1;FOXM1;AURKA;EPS8;CCNB2;CCNB1;CDC23;CHEK2;RCC1;PIM2;POLE;UBE2C;PLK1;CDC7;CDC25C;MASTL;CDC25A;CDC25B;CCNA2;WEE1;MELK;DBF4;CCNE2;RPS6KB1;UBE2S;CDK2;PPP2R2D;CDK1;TACC3;BIRC5;CDKN3	GO_Biological_Process_2025
Module 5	DNA Double Strand Break Response	23/61	6.80317	1.5485e-09	BARD1;H2BC9;MRE11;UBE2I;H2BC5;H2BC3;H2BC4;RNF8;BRCA1;BAZ1B;H2BC17;H2BC13;H2BC14;PPP5C;H2BC26;H2BC15;KAT5;CHEK2;H2BC21;H2BC11;NSD2;H4C1;KPNA2	Reactome_Pathways_2024
Module 5	Regulation of Double-Strand Break Repair via Homologous Recombination (GO:0010569)	28/80	6.06631	1.62148e-09	PARPBP;MAGEF1;RNF8;CGAS;YEATS4;RAD51AP1;SMCHD1;ING3;KAT5;VPS72;FIGNL1;CHEK1;USP51;KMT5A;BRD8;RMI2;PARP1;ACTL6A;PLK1;FANCB;MRGBP;RAD51;ARTN;SHLD3;SHLD2;PELI1;TIMELESS;WRAP53	GO_Biological_Process_2025
Module 5	Regulation of Endogenous Retroelements	32/111	4.56796	1.63221e-09	SMARCD1;HDAC2;ZNF273;H2AC18;H2AC14;H2BC26;RBBP4;H2BC21;ZNF649;SUMO2;ZNF669;H4C1;RBBP7;H2BC9;ZNF680;UBE2I;ZNF141;H2BC5;H2AC4;H2BC3;ACTL6A;H2BC4;H2BC17;H2BC13;H2BC14;H2BC15;ZNF93;ZNF519;H2AC20;ZNF30;H2BC11;ZNF257	Reactome_Pathways_2024
Module 5	Chromatin Modifying Enzymes	51/238	3.09369	1.63221e-09	SUV39H2;SUV39H1;ASH2L;YEATS4;H2AC18;H2AC11;H2AC12;H2AC14;ING3;H2BC26;KAT5;H2BC21;SAP130;WDR5;H4C1;KMT5A;JAK2;EED;H2AC4;ACTL6A;H2BC17;H2BC18;SAP30;H2BC13;H2BC14;H2BC15;HAT1;H2BC11;SMARCD1;HDAC2;HDAC3;RBBP4;RBBP5;NSD2;BRD8;RBBP7;KAT14;H2BC9;SUZ12;H2BC5;KDM4D;H2BC3;H2BC4;ELP4;ELP5;ELP6;H2AC25;MRGBP;H2AC20;H2AC21;EZH2	Reactome_Pathways_2024
Module 5	Chromatin Organization	51/238	3.09369	1.63221e-09	SUV39H2;SUV39H1;ASH2L;YEATS4;H2AC18;H2AC11;H2AC12;H2AC14;ING3;H2BC26;KAT5;H2BC21;SAP130;WDR5;H4C1;KMT5A;JAK2;EED;H2AC4;ACTL6A;H2BC17;H2BC18;SAP30;H2BC13;H2BC14;H2BC15;HAT1;H2BC11;SMARCD1;HDAC2;HDAC3;RBBP4;RBBP5;NSD2;BRD8;RBBP7;KAT14;H2BC9;SUZ12;H2BC5;KDM4D;H2BC3;H2BC4;ELP4;ELP5;ELP6;H2AC25;MRGBP;H2AC20;H2AC21;EZH2	Reactome_Pathways_2024
Module 5	Recognition of DNA Damage by PCNA-containing Replication Complex	16/30	12.8075	1.71458e-09	RFC5;RFC3;PCNA;RFC4;RFC2;RPA1;RPA2;POLD3;POLD1;POLE2;RPA3;POLE3;USP1;POLE;DTL;RAD18	Reactome_Pathways_2024
Module 5	Oxidative Stress Induced Senescence	29/94	5.0259	1.88471e-09	H2AC18;MAPK9;H2AC14;H2BC26;RBBP4;H2BC21;E2F1;E2F2;H4C1;RBBP7;H2BC9;SUZ12;MAP2K4;CDKN2C;H2BC5;EED;H2AC4;CBX2;H2BC3;H2BC4;H2BC17;H2BC13;H2BC14;H2BC15;TFDP1;H2AC20;H2BC11;MAPKAPK5;EZH2	Reactome_Pathways_2024
Module 5	Regulation of HSF1-mediated Heat Shock Response	27/83	5.4273	2.03247e-09	NUP205;NUP107;SEH1L;HSPA4L;HSPA14;HSPA13;NUP160;NUP42;NUP85;NUP62;NUP43;NUP88;RAE1;NDC1;HSPA9;NUP155;RPA1;RPA2;HSPA2;NUP93;NUP50;RPA3;NUP35;NUP54;NUP98;NUP58;NUP37	Reactome_Pathways_2024
Module 5	RNA Polymerase II Transcription Termination	24/67	6.27564	2.08185e-09	SLBP;ZNF473;CPSF4;CPSF7;CPSF6;CPSF3;EIF4A3;CSTF2;THOC3;U2AF1;CASC3;MAGOHB;NUDT21;DDX39A;PABPN1;CLP1;PCF11;SARNP;MAGOH;CSTF1;SNRPE;RNPS1;SRSF6;SNRPB	Reactome_Pathways_2024
Module 5	Interactions of Vpr With Host Cellular Proteins	19/43	8.88334	2.23431e-09	NDC1;NUP205;NUP107;SEH1L;NUP155;NUP160;NUP93;NUP42;NUP85;NUP50;NUP62;NUP35;NUP43;NUP88;NUP54;NUP98;RAE1;NUP58;NUP37	Reactome_Pathways_2024
Module 5	DNA Integrity Checkpoint Signaling (GO:0031570)	21/47	9.07329	2.41342e-09	H2AX;CDT1;TIPIN;DONSON;CDC5L;CDC6;PRPF19;BRIP1;CDC45;CHEK2;CHEK1;E2F1;TIMELESS;INTS7;CLSPN;TOPBP1;DNA2;RAD9B;ATRIP;RAD9A;RHNO1	GO_Biological_Process_2025
Module 5	mRNA Processing (GO:0006397)	51/226	3.30801	2.57853e-09	TCERG1;RAMAC;DBR1;EIF4A3;GPATCH1;CASC3;DDX41;PRPF19;USP39;PNN;SART3;METTL16;METTL3;GCFC2;PRPF4;DDX39A;PRPF3;FRG1;GEMIN6;PPIH;SNRPE;SRSF6;CBLL1;SNRPB;RBM22;CSTF2;CWF19L2;U2AF1;DHX35;TRA2B;LEO1;RPRD1B;SRSF10;SF3A3;CPSF7;SF3A2;CPSF6;CPSF3;CDC5L;MAGOHB;LSM5;LSM3;LSM2;NUDT21;SNRNP40;PHF5A;LSM6;HNRNPF;RNPS1;BUD13;RBMX	GO_Biological_Process_2025
Module 5	Tubulin Binding (GO:0015631)	65/326	2.83833	2.59305e-09	MAST2;CETN3;KIF14;STMN3;BRCA1;BRCA2;PHF6;KIF15;WDR90;STMN1;NUF2;KIF21A;DNM1L;GTSE1;DLGAP5;GIT1;CDK5RAP2;GAS2L3;CEP135;CEP295;VASH2;KIF23;HAUS6;KNL1;KIF22;CCSAP;CKAP5;DNM3;EML6;PSRC1;KIF2A;FAM161A;CEP57L1;KIFC1;KIF16B;BIRC5;KIF2C;KIF20A;KIF20B;HDGFL3;SPATA4;SKA3;SKA1;SKA2;RACGAP1;HAUS8;FAM83D;CCT5;SPAG5;NDE1;PLK1;CRIPT;NDC80;NEDD1;KIF18A;KIF18B;CDK5;REEP4;PRC1;AGBL3;TUBGCP5;TUBGCP3;CEP44;SPC24;MET…	GO_Molecular_Function_2025
Module 5	Chromatin Modifications During the Maternal to Zygotic Transition (MZT)	18/39	9.61374	2.67812e-09	H2BC9;H2BC5;UHRF1;H2AC4;H2BC3;H2BC4;H2BC17;H2AC18;UNG;H2BC13;H2BC14;H2AC14;H2BC26;H2BC15;H2BC21;H2AC20;H2BC11;H4C1	Reactome_Pathways_2024
Module 5	Leading Strand Synthesis	11/14	40.9902	2.67812e-09	RFC5;POLD3;PRIM2;POLA1;RFC3;POLA2;PCNA;RFC4;RFC2;PRIM1;POLD1	Reactome_Pathways_2024
Module 5	Mismatch Repair (MMR) Directed by MSH2 MSH6 (MutSalpha)	11/14	40.9902	2.67812e-09	MSH6;POLD3;PCNA;LIG1;MSH2;EXO1;POLD1;RPA3;RPA1;RPA2;MLH1	Reactome_Pathways_2024
Module 5	Polymerase Switching	11/14	40.9902	2.67812e-09	RFC5;POLD3;PRIM2;POLA1;RFC3;POLA2;PCNA;RFC4;RFC2;PRIM1;POLD1	Reactome_Pathways_2024
Module 5	RNA Polymerase I Promoter Opening	16/31	11.9531	3.10323e-09	H2BC9;H2BC5;H2AC4;H2BC3;H2BC4;H2BC17;H2AC18;H2BC13;H2BC14;H2AC14;H2BC26;H2BC15;H2BC21;H2AC20;H2BC11;H4C1	Reactome_Pathways_2024
Module 5	RNA Polymerase I Promoter Clearance	26/79	5.51962	3.11204e-09	HDAC2;TTF1;H2AC18;H2AC14;H2BC26;RBBP4;H2BC21;TAF1A;H4C1;POLR2H;RBBP7;POLR2K;H2BC9;TBP;H2BC5;H2AC4;H2BC3;H2BC4;H2BC17;H2BC13;H2BC14;H2BC15;ERCC3;H2AC20;H2BC11;POLR1C	Reactome_Pathways_2024
Module 5	Cilium Assembly	45/200	3.28677	3.35885e-09	DYNC2I2;ARL6;FBF1;CCP110;TUBA1C;ARL13B;HAUS8;TCTN2;CNTRL;PDE6D;CEP72;CEP192;NEK2;CEP97;CEP76;CCT5;CDK5RAP2;CEP78;PLK4;IQCB1;CEP135;ODF2;NDE1;CEP152;PLK1;SCLT1;KIF24;HAUS3;HAUS6;HAUS5;TUBG1;TUBB4B;CKAP5;HAUS2;HAUS1;NEDD1;CENPJ;ALMS1;CDK1;CEP83;CEP41;SFI1;CEP43;CEP89;TUBA8	Reactome_Pathways_2024
Module 5	Estrogen-dependent Gene Expression	33/121	4.22946	3.90091e-09	CHD1;H2AC18;H2AC14;H2BC26;KAT5;POLR2B;RAD21;H2BC21;H4C1;POLR2H;KPNA2;POLR2I;POLR2K;H2BC9;MED1;TLE3;TBP;H2BC5;H2AC4;H2BC3;PTGES3;H2BC4;H2BC17;USF1;H2BC13;STAG1;H2BC14;H2BC15;GPAM;H2AC20;H2BC11;BCL2;EBAG9	Reactome_Pathways_2024
Module 5	DNA Replication Initiation (GO:0006270)	14/21	22.3944	4.04935e-09	PRIM2;MCM7;PRIM1;MCM10;CDC6;ORC5;POLA1;POLA2;CDC45;ORC6;ORC3;MCM3;MCM5;TOPBP1	GO_Biological_Process_2025
Module 5	Protein Localization to Chromosome, Centromeric Region (GO:0071459)	13/18	29.0981	4.15772e-09	RB1;ZWILCH;H2AC4;TTK;CTCF;KNL1;HASPIN;CENPA;MTBP;H2BC11;CDK1;BUB3;SPDL1	GO_Biological_Process_2025
Module 5	CMG Complex (GO:0071162)	9/9	165132	4.33091e-09	GINS1;GINS2;MCM7;GINS3;GINS4;MCM3;MCM4;MCM5;MCM6	GO_Cellular_Component_2025
Module 5	RNA Polymerase I Promoter Escape	22/59	6.67952	4.47009e-09	H2BC9;TBP;H2BC5;H2AC4;H2BC3;H2BC4;H2BC17;H2AC18;H2BC13;H2BC14;H2AC14;H2BC26;H2BC15;ERCC3;H2BC21;H2AC20;H2BC11;POLR1C;TAF1A;H4C1;POLR2H;POLR2K	Reactome_Pathways_2024
Module 5	Damaged DNA Binding (GO:0003684)	21/48	8.73677	4.58038e-09	DCLRE1B;DCLRE1A;FEN1;PCNA;PARP1;PARP2;HMGB2;XRCC1;HMGB1;FANCG;UNG;NEIL3;ERCC3;NTHL1;ARTN;POLD1;RPA3;RBBP8;AUNIP;ERCC5;RAD18	GO_Molecular_Function_2025
Module 5	Effect Of Progerin On Genes Involved In Progeria WP4320	18/37	10.6269	4.69503e-09	RB1;H3C8;HDAC2;SUV39H1;CBX1;RBBP4;H3C13;H3C11;H3C12;E2F1;H3C1;H3C10;H3C3;H3C2;RBBP7;H3C7;H3C6;H3-3B	WikiPathways_2024_Human
Module 5	DNA IR Double Strand Breaks And Cellular Response Via ATM WP3959	22/55	7.4908	4.69503e-09	H2AX;BLM;MRE11;PCNA;RIF1;PARP1;ACTL6A;RNF8;BRCA1;BRCA2;CDC25C;STK3;RASSF1;RAD51;KAT5;CDK5;EXO1;FANCD2;CHEK2;CHEK1;E2F1;RAD9A	WikiPathways_2024_Human
Module 5	Spindle Assembly (GO:0051225)	26/73	6.2263	4.74184e-09	HDAC3;UHRF1;CDCA8;KIF11;AURKB;KIF15;HAUS8;CHEK2;RCC1;NEK2;CEP192;SAC3D1;SPICE1;HAUS3;HAUS6;HAUS5;HAUS2;MZT1;HAUS1;TPX2;KIF2A;INCENP;KIFC1;TUBGCP5;BIRC5;TUBGCP3	GO_Biological_Process_2025
Module 5	RNA Polymerase I Transcription	26/81	5.31833	5.64361e-09	HDAC2;TTF1;H2AC18;H2AC14;H2BC26;RBBP4;H2BC21;TAF1A;H4C1;POLR2H;RBBP7;POLR2K;H2BC9;TBP;H2BC5;H2AC4;H2BC3;H2BC4;H2BC17;H2BC13;H2BC14;H2BC15;ERCC3;H2AC20;H2BC11;POLR1C	Reactome_Pathways_2024
Module 5	Formation of the Beta-Catenin TCF Transactivating Complex	22/60	6.50339	6.40268e-09	H2BC9;TLE3;H2BC5;H2AC4;H2BC3;H2BC4;ASH2L;H2BC17;H2AC18;H2BC13;PYGO2;H2BC14;H2AC14;H2BC26;H2BC15;KAT5;RBBP5;H2BC21;H2AC20;H2BC11;LEO1;H4C1	Reactome_Pathways_2024
Module 5	Recruitment and ATM-med Phosphorylation of Repair and Signaling Proteins at DNA Double Strand Breaks	22/60	6.50339	6.40268e-09	BARD1;H2BC9;MRE11;UBE2I;H2BC5;H2BC3;H2BC4;RNF8;BRCA1;BAZ1B;H2BC17;H2BC13;H2BC14;PPP5C;H2BC26;H2BC15;KAT5;CHEK2;H2BC21;H2BC11;NSD2;H4C1	Reactome_Pathways_2024
Module 5	Positive Regulation of Chromosome Separation (GO:1905820)	11/13	61.4887	6.77224e-09	PLSCR1;INCENP;NCAPH2;NCAPG2;CDCA8;NCAPG;BIRC5;NCAPD2;NCAPD3;SMC4;NCAPH	GO_Biological_Process_2025
Module 5	Mismatch Repair	11/15	30.741	8.83179e-09	MSH6;POLD3;PCNA;LIG1;MSH2;EXO1;POLD1;RPA3;RPA1;RPA2;MLH1	Reactome_Pathways_2024
Module 5	HCMV Late Events	40/171	3.45065	8.90171e-09	NUP205;NUP107;SEH1L;NUP160;H2AC18;H2AC11;H2AC12;H2AC14;H2BC26;NUP85;NUP42;H2BC21;NUP62;NUP88;NUP43;H4C1;RAE1;NDC1;H2BC9;NUP155;H2BC5;H2AC4;H2BC3;H2BC4;H2BC17;H2BC18;NUP93;H2BC13;H2BC14;H2AC25;H2BC15;H2AC20;NUP50;H2AC21;H2BC11;NUP35;NUP54;NUP98;NUP58;NUP37	Reactome_Pathways_2024
Module 5	Regulation of G2/M Transition of Mitotic Cell Cycle (GO:0010389)	18/37	10.6269	9.3341e-09	RRM1;PINX1;KIF14;CDC7;DBF4B;PKMYT1;CDC25C;CDC25A;CDC25B;RAD51B;CCNB1;CENPF;WEE1;RAD51C;CDK2;CDK1;FBXO5;DTL	GO_Biological_Process_2025
Module 5	Regulation of Cell Cycle Process (GO:0010564)	38/146	3.97632	9.3341e-09	SMARCD1;CDCA2;ZWILCH;CCP110;KIF11;DBF4B;MKI67;FBXO43;PKMYT1;AURKB;AURKA;RACGAP1;CHEK1;RCC1;KNTC1;NEK2;RPRD1B;USP51;FBXO5;ECT2;BUB1;GIT1;TIPIN;BORA;SPAG5;PLK1;CDC25C;KNSTRN;MYO19;SFRP1;DBF4;CDK5;PRC1;PPP2R2D;KIF2C;KIF20A;CEP85;KIF20B	GO_Biological_Process_2025
Module 5	Organelle Biogenesis and Maintenance	57/297	2.69633	1.09409e-08	DYNC2I2;CRTC2;CCP110;GABPB1;TUBA1C;CHCHD3;TCTN2;CNTRL;MTERF1;NEK2;CEP97;CDK5RAP2;IQCB1;MED1;CEP135;TWNK;KIF24;HAUS3;HAUS6;HAUS5;TUBG1;CKAP5;HAUS2;HAUS1;TFAM;SFI1;HDAC3;ARL6;FBF1;NRF1;ARL13B;HAUS8;PDE6D;CEP72;CEP192;CEP76;CCT5;CEP78;PLK4;HSPA9;ODF2;NDE1;CEP152;PLK1;SCLT1;IMMT;NR1D1;TUBB4B;NEDD1;CENPJ;ALMS1;CDK1;CEP83;CEP41;CEP43;CEP89;TUBA8	Reactome_Pathways_2024
Module 5	Four-Way Junction DNA Binding (GO:0000400)	12/16	33.5561	1.25998e-08	GEN1;MSH6;RAD51B;BLM;RAD51C;FANCM;MSH2;XRCC2;XRCC3;HMGB2;HMGB3;HMGB1	GO_Molecular_Function_2025
Module 5	Negative Regulation of DNA Recombination (GO:0045910)	19/42	9.27008	1.33822e-08	BLM;RMI2;PARPBP;MAGEF1;PLK1;CGAS;FANCB;H1-10;H1-3;H1-2;H1-5;MSH6;H1-4;SMCHD1;KAT5;MSH2;SHLD3;SHLD2;KMT5A	GO_Biological_Process_2025
Module 5	Base Excision Repair WP4752	16/31	11.9531	1.48313e-08	FEN1;PCNA;PARP1;LIG1;PARP2;XRCC1;HMGB1;UNG;POLD3;NEIL3;NTHL1;POLD1;POLE2;POLE3;POLE;MUTYH	WikiPathways_2024_Human
Module 5	Chromosome Organization (GO:0051276)	20/47	8.31563	1.68353e-08	RB1;TOP2A;CENPW;NUP155;GMNN;CDCA8;CIP2A;H1-10;H1-3;H1-2;H1-5;MSH6;H1-4;CENPH;MSH2;NUF2;HAT1;TOPBP1;H3C7;H3-3B	GO_Biological_Process_2025
Module 5	Polymerase Switching on the C-strand of the Telomere	14/26	13.0598	1.7899e-08	RFC5;PRIM2;ACD;RFC3;PCNA;RFC4;RFC2;DSCC1;PRIM1;CHTF18;POLD3;POLA1;POLA2;POLD1	Reactome_Pathways_2024
Module 5	Transcriptional Regulation of Granulopoiesis	21/58	6.372	1.96552e-08	H2BC9;H2BC5;H2AC4;H2BC3;H2BC4;DEK;H2BC17;H2AC18;H2BC13;H2BC14;H2AC14;H2BC26;H2BC15;TFDP1;KLF5;H2BC21;H2AC20;H2BC11;CDK2;E2F1;H4C1	Reactome_Pathways_2024
Module 5	Transcription of E2F Targets Under Negative Control by DREAM Complex	12/19	19.1718	2.05382e-08	TOP2A;LIN54;PCNA;RBL1;TFDP1;RBBP4;E2F1;CDC6;LIN9;E2F4;CDC25A;LIN52	Reactome_Pathways_2024
Module 5	Transcription of E2F Targets Under Neg Control by P107 (RBL1) and P130 (RBL2) in Complex With HDAC1	11/16	24.5915	2.53101e-08	CCNA2;LIN54;RBL1;TFDP1;RBBP4;CDK1;E2F1;MYBL2;LIN9;E2F4;LIN52	Reactome_Pathways_2024
Module 5	Regulation of Mitotic Cell Cycle Spindle Assembly Checkpoint (GO:0090266)	13/20	20.7821	2.70095e-08	GEN1;XRCC3;CDCA8;KNL1;SKA3;AURKB;NDC80;SKA1;CCNB1;INCENP;BIRC5;CDK5RAP2;MAD2L1	GO_Biological_Process_2025
Module 5	Activated PKN1 Stimulates Transcription of AR (Androgen Receptor) Regulated Genes KLK2 and KLK3	16/35	9.43456	2.80592e-08	H2BC9;H2BC5;H2AC4;H2BC3;H2BC4;H2BC17;H2AC18;H2BC13;H2BC14;H2AC14;H2BC26;H2BC15;H2BC21;H2AC20;H2BC11;H4C1	Reactome_Pathways_2024
Module 5	Senescence-Associated Secretory Phenotype (SASP)	25/81	5.0191	2.8114e-08	H2AC18;FZR1;CDC23;H2AC14;H2BC26;H2BC21;RPS6KA1;H4C1;H2BC9;CDKN2C;H2BC5;UBE2C;H2AC4;H2BC3;H2BC4;H2BC17;CCNA2;H2BC13;H2BC14;H2BC15;UBE2S;H2AC20;H2BC11;CDK2;ANAPC4	Reactome_Pathways_2024
Module 5	Chromosome Condensation (GO:0030261)	16/31	11.9531	2.95214e-08	TOP2A;CDCA5;NCAPH2;PLK1;NCAPG;TENT4A;SMC4;H1-10;NCAPH;H1-3;H1-2;H1-5;H1-4;NCAPD2;KMT5A;NCAPD3	GO_Biological_Process_2025
Module 5	HCMV Infection	51/259	2.77813	3.09474e-08	NUP107;H2AC18;H2AC11;H2AC12;TUBA1C;H2AC14;H2BC26;H2BC21;NUP62;H4C1;NDC1;EED;H2AC4;H2BC17;H2BC18;NUP93;H2BC13;H2BC14;H2BC15;NUP50;H2BC11;NUP54;NUP98;NUP58;NUP205;SEH1L;HDAC3;NUP160;RBBP4;NUP85;NUP42;NUP88;NUP43;RBBP7;RAE1;H2BC9;SUZ12;DUT;H2BC5;NUP155;H2BC3;H2BC4;CBX1;TUBB4B;H2AC25;H2AC20;H2AC21;NUP35;EZH2;TUBA8;NUP37	Reactome_Pathways_2024
Module 5	DNA-templated DNA Replication Maintenance of Fidelity (GO:0045005)	19/44	8.52754	3.28028e-08	GEN1;BLM;TIPIN;PCNA;CENPX;FANCM;MCM8;TONSL;DONSON;NUCKS1;TRAIP;FAM111A;MMS22L;RAD51;EME1;POLD1;RFWD3;TIMELESS;POLE	GO_Biological_Process_2025
Module 5	Antiviral Mechanism by IFN-stimulated Genes	37/158	3.45111	3.38823e-08	NUP205;NUP107;SEH1L;EIF4A3;FAAP24;NUP160;TUBA1C;NUP85;NUP42;NUP62;NUP88;NUP43;KPNA2;RAE1;NDC1;UBE2I;FANCM;NUP155;FANCL;FANCA;FANCC;FANCB;HSPA2;FANCE;TUBB4B;ILF2;FANCG;NUP93;NUP50;OAS3;CDK1;NUP35;NUP54;NUP98;NUP58;TUBA8;NUP37	Reactome_Pathways_2024
Module 5	HIV Life Cycle	37/158	3.45111	3.38823e-08	NUP205;FEN1;NUP107;SEH1L;GTF2E1;NUP160;XPO1;NUP85;NUP42;POLR2B;NUP62;RCC1;NUP88;NUP43;POLR2H;POLR2I;RAE1;POLR2K;NDC1;RANBP1;TBP;LIG1;NUP155;XRCC4;XRCC5;SSRP1;NUP93;ERCC3;NUP50;TAF4B;NUP35;NUP54;NUP98;TAF5;TAF3;NUP58;NUP37	Reactome_Pathways_2024
Module 5	Base excision repair	16/33	10.5457	4.11951e-08	FEN1;PCNA;LIG1;PARP1;PARP2;XRCC1;HMGB1;UNG;POLD3;NEIL3;NTHL1;POLD1;POLE2;POLE3;POLE;MUTYH	KEGG_2021_Human
Module 5	Mitotic DNA Damage Checkpoint Signaling (GO:0044773)	22/59	6.67952	4.16456e-08	TIPIN;BLM;MRE11;PLK1;DONSON;BRCA1;TICRR;FZR1;EME1;FANCD2;ARTN;CHEK2;RFWD3;CHEK1;CDK2;CDK1;TOPBP1;CLSPN;RAD9B;ZNF367;DTL;RAD9A	GO_Biological_Process_2025
Module 5	tRNA Processing	35/146	3.55622	4.55199e-08	NUP205;NUP107;POP7;SEH1L;RPP30;CSTF2;ZBTB8OS;NUP160;OSGEP;CLP1;NUP85;NUP42;NUP62;NUP88;NUP43;RAE1;TRDMT1;NDC1;CPSF4;TRMT10A;NUP155;ADAT1;TPRKB;CDKAL1;ADAT2;NUP93;NUP50;TRMT13;NUP35;NUP54;NUP98;TRMT11;RPP25;NUP58;NUP37	Reactome_Pathways_2024
Module 5	Cellular Response to Heat Stress	28/101	4.31625	4.80286e-08	NUP205;NUP107;SEH1L;HSPA4L;HSPA14;HSPA13;NUP160;NUP85;NUP42;NUP62;NUP88;NUP43;RAE1;HSPA9;NDC1;NUP155;PTGES3;RPA1;RPA2;HSPA2;NUP93;NUP50;RPA3;NUP35;NUP54;NUP98;NUP58;NUP37	Reactome_Pathways_2024
Module 5	Dual Incision in GG-NER	17/41	7.93853	5.51648e-08	RFC5;RFC3;PCNA;RFC4;PARP1;PARP2;RFC2;RPA1;RPA2;POLD3;ERCC3;POLD1;POLE2;RPA3;POLE3;ERCC5;POLE	Reactome_Pathways_2024
Module 5	DNA Strand Elongation Involved in DNA Replication (GO:0006271)	10/12	55.8648	5.67563e-08	POLD3;POLA1;RFC3;PCNA;RFC4;MCM7;POLE3;MCM3;MCM4;POLE	GO_Biological_Process_2025
Module 5	mRNA Splicing, via Spliceosome (GO:0000398)	46/211	3.15641	5.71585e-08	DBR1;EIF4A3;CWF19L2;GPATCH1;U2AF1;CASC3;DDX41;LIN9;PRPF19;USP39;PQBP1;COIL;PNN;SART3;DHX35;TRA2B;SRSF10;ZC3H14;SF3A3;SF3A2;METTL3;CDC5L;MAGOHB;LSM5;LSM3;LSM2;GCFC2;PRPF4;SNRNP40;DDX39A;PHF5A;LSM6;HNRNPF;PRPF3;FRG1;GEMIN4;SRFBP1;RNPS1;GEMIN6;PPIH;SNRPE;BUD13;SRSF6;RBMX;SNRPB;RBM22	GO_Biological_Process_2025
Module 5	mRNA Splicing - Major Pathway	43/204	3.01889	5.96142e-08	TCERG1;EIF4A3;CWF19L2;GPATCH1;U2AF1;CASC3;DDX41;PRPF19;USP39;PQBP1;PNN;POLR2B;DHX35;TRA2B;MAGOH;POLR2H;POLR2I;SRSF10;POLR2K;SF3A3;SF3A2;CDC5L;MAGOHB;WBP11;LSM5;LSM3;LSM2;HNRNPL;GCFC2;PRPF4;SNRNP40;PHF5A;LSM6;HNRNPF;PRPF3;RNPS1;PPIH;SNRPE;BUD13;SRSF6;RBMX;SNRPB;RBM22	Reactome_Pathways_2024
Module 5	Response to Ionizing Radiation (GO:0010212)	24/71	5.74029	6.78048e-08	H2AX;BARD1;BLM;PAXIP1;KDM4D;XRCC4;RNF8;BRCA1;BRCA2;INIP;TICRR;RAD51AP1;RAD51;KAT5;MSH2;FANCD2;FIGNL1;RFWD3;INTS7;TOPBP1;ECT2;RAD9B;RHNO1;RAD9A	GO_Biological_Process_2025
Module 5	Establishment of Chromosome Localization (GO:0051303)	12/18	22.3683	7.10209e-08	CENPF;INCENP;NDE1;GMNN;SPICE1;KIF2C;KIF22;SKA3;FAM83D;CENPQ;NDC80;SKA1	GO_Biological_Process_2025
Module 5	Nuclear Chromosome Segregation (GO:0098813)	12/18	22.3683	7.10209e-08	TOP2A;CENPF;INCENP;GMNN;SPICE1;KIF2C;KIF22;SKA3;FAM83D;CENPQ;NDC80;SKA1	GO_Biological_Process_2025
Module 5	Positive Regulation of Chromosome Segregation (GO:0051984)	12/18	22.3683	7.10209e-08	CCNB1;KAT5;NCAPH2;NCAPG2;CDK1;NCAPG;NCAPD2;CDC6;NCAPD3;SMC4;NCAPH;RAD18	GO_Biological_Process_2025
Module 5	Epigenetic Regulation by WDR5-containing Histone Modifying Complexes	33/135	3.64615	7.13978e-08	RB1;PAXIP1;HDAC3;CXXC1;ASH2L;H2AC18;PAGR1;LIPE;H2AC14;H2BC26;RBBP5;H2BC21;WDR5;H4C1;KAT14;H2BC9;MED1;H2BC5;H2AC4;H2BC3;H2BC4;H2BC17;MED6;MED7;H2BC13;H2BC14;H2BC15;CDK5;GPAM;H2AC20;H2BC11;PLIN2;PPARG	Reactome_Pathways_2024
Module 5	Mismatch Repair (MMR) Directed by MSH2 MSH3 (MutSbeta)	10/14	27.9294	7.23334e-08	POLD3;PCNA;LIG1;MSH2;EXO1;POLD1;RPA3;RPA1;RPA2;MLH1	Reactome_Pathways_2024
Module 5	Gap-filling DNA Repair Synthesis and Ligation in TC-NER	21/62	5.74908	7.29616e-08	RFC5;RFC3;RFC4;PCNA;LIG1;RFC2;RPA1;RPA2;XRCC1;PRPF19;POLD3;ERCC3;POLR2B;POLD1;POLE2;RPA3;POLE3;POLR2H;POLR2I;POLE;POLR2K	Reactome_Pathways_2024
Module 5	RNA Splicing, via Transesterification Reactions With Bulged Adenosine as Nucleophile (GO:0000377)	40/171	3.45065	7.41985e-08	DBR1;EIF4A3;CWF19L2;GPATCH1;U2AF1;CASC3;DDX41;PRPF19;USP39;PNN;SART3;DHX35;TRA2B;SRSF10;SF3A3;SF3A2;METTL3;CDC5L;LSM5;MAGOHB;LSM3;LSM2;PRPF4;GCFC2;SNRNP40;DDX39A;LSM6;PHF5A;PRPF3;HNRNPF;FRG1;GEMIN6;PPIH;SNRPE;RNPS1;BUD13;SRSF6;RBMX;SNRPB;RBM22	GO_Biological_Process_2025
Module 5	Double-Strand Break Repair via Break-Induced Replication (GO:0000727)	9/10	100.501	9.87566e-08	GINS2;MCM7;MCMDC2;GINS4;MCM3;MCM4;CDC7;MCM5;MCM6	GO_Biological_Process_2025
Module 5	mRNA Splicing	44/215	2.90866	1.00779e-07	TCERG1;EIF4A3;CWF19L2;GPATCH1;U2AF1;CASC3;DDX41;PRPF19;USP39;PQBP1;PNN;POLR2B;DHX35;TRA2B;MAGOH;POLR2H;POLR2I;SRSF10;POLR2K;SF3A3;SF3A2;CDC5L;MAGOHB;WBP11;LSM5;LSM3;LSM2;HNRNPL;GCFC2;PRPF4;SNRNP40;PHF5A;LSM6;HNRNPF;PRPF3;RNPS1;PPIH;SNRPE;BUD13;SNRNP48;SRSF6;RBMX;SNRPB;RBM22	Reactome_Pathways_2024
Module 5	Processing of Capped Intronless Pre-mRNA	14/29	10.4462	1.03853e-07	SLBP;ZNF473;CPSF4;CPSF7;CPSF6;CPSF3;CSTF2;NUDT21;PABPN1;CLP1;PCF11;CSTF1;SNRPE;SNRPB	Reactome_Pathways_2024
Module 5	Cyclin A B1 B2 Associated Events During G2 M Transition	13/25	12.1196	1.07681e-07	PLK1;FOXM1;PKMYT1;CDC25C;CDC25A;CDC25B;CCNA2;CCNB2;CCNB1;WEE1;XPO1;CDK2;CDK1	Reactome_Pathways_2024
Module 5	mRNA 3'-End Processing	20/58	5.90493	1.12648e-07	CPSF4;CPSF7;CPSF6;CPSF3;EIF4A3;CSTF2;THOC3;U2AF1;CASC3;MAGOHB;NUDT21;DDX39A;PABPN1;CLP1;PCF11;SARNP;MAGOH;CSTF1;RNPS1;SRSF6	Reactome_Pathways_2024
Module 5	E2F-enabled Inhibition of Pre-Replication Complex Formation	8/9	89.2798	1.18083e-07	ORC5;CCNB1;ORC6;ORC1;MCM8;ORC3;ORC2;CDK1	Reactome_Pathways_2024
Module 5	DNA Damage Bypass	18/48	6.72632	1.27319e-07	RFC5;RFC3;PCNA;RFC4;RFC2;RPA1;RPA2;RCHY1;POLD3;POLD1;POLE2;RPA3;POLE3;PCLAF;USP1;POLE;DTL;RAD18	Reactome_Pathways_2024
Module 5	DNA Replication Checkpoint Signaling (GO:0000076)	12/19	19.1718	1.68667e-07	CDT1;TIPIN;CDC45;DONSON;TIMELESS;CDC6;CLSPN;DNA2;TOPBP1;RAD9B;TICRR;RAD9A	GO_Biological_Process_2025
Module 5	Regulation of Endogenous Retroelements by the Human Silencing Hub (HUSH) Complex	16/39	7.79207	1.73079e-07	H2BC9;H2BC5;H2AC4;H2BC3;H2BC4;H2BC17;H2AC18;H2BC13;H2BC14;H2AC14;H2BC26;H2BC15;H2BC21;H2AC20;H2BC11;H4C1	Reactome_Pathways_2024
Module 5	Negative Regulation of Gene Expression, Epigenetic (GO:0045814)	30/110	4.22349	1.8064e-07	RB1;H2AX;SUV39H2;DNMT1;HDAC2;UHRF1;BRCA1;HMGB1;LMNB2;LMNB1;H2AC11;H2AC12;H2AC14;ING3;CHEK1;SMARCAD1;H2AZ1;HELLS;EED;H2AC4;CBX1;H2AC25;ZNF93;H2AC20;H2AC21;MTF2;POLE3;APOBEC3B;EZH2;PHF19	GO_Biological_Process_2025
Module 5	Viral carcinogenesis	43/203	3.03793	2.08569e-07	RB1;HDAC2;HDAC3;RBPJ;GTF2E1;CDC20;CREB3L4;H2BC21;CHEK1;H4C1;H4C4;H4C3;JAK3;H4C6;H4C5;H4C8;H2BC9;RANBP1;H2BC7;H4C9;H2BC8;TBP;H2BC5;H2BC6;H2BC3;H2BC4;MRPS18B;TRAF2;H2BC17;H2BC18;CCNA2;H2BC13;H2BC14;H2BC15;RBL1;CCNE2;H4C13;H2BC10;H4C12;CDK2;H2BC11;H4C11;CDK1	KEGG_2021_Human
Module 5	Nucleotide Excision Repair	28/108	3.93707	2.23859e-07	PCNA;PRPF19;POLD3;POLR2B;POLD1;SUMO2;POLR2H;POLR2I;POLE;POLR2K;RFC5;RFC3;UBE2I;RFC4;LIG1;PARP1;PARP2;RFC2;ACTL6A;RPA1;XRCC1;RPA2;RAD23A;ERCC3;POLE2;RPA3;POLE3;ERCC5	Reactome_Pathways_2024
Module 5	Protein Localization to Chromosome (GO:0034502)	19/49	7.10435	2.32898e-07	H2AX;RB1;SLF1;SLF2;PARP1;XRCC4;MCM8;XRCC5;PINX1;PLK1;TONSL;CTCF;HASPIN;CENPA;MMS22L;ARTN;RAD21;TOPBP1;RHNO1	GO_Biological_Process_2025
Module 5	Regulation of Endogenous Retroelements by Piwi-interacting RNAs (piRNAs)	21/66	5.23691	2.44745e-07	H2BC9;SMARCD1;HDAC2;H2BC5;H2AC4;H2BC3;ACTL6A;H2BC4;H2BC17;H2AC18;H2BC13;H2BC14;H2AC14;H2BC26;H2BC15;RBBP4;H2BC21;H2AC20;H2BC11;H4C1;RBBP7	Reactome_Pathways_2024
Module 5	Prader Willi And Angelman Syndrome WP3998	28/102	4.25769	3.06285e-07	RB1;PCSK1;NUP205;NUP107;SEH1L;RNF8;NUP160;GLE1;NUP85;NUP42;NUP62;E2F1;NUP88;NUP43;RAE1;NDC1;CDKN2C;NUP155;CDC6;NUP93;NUP50;TUBGCP5;NUP35;TUBGCP3;NUP54;NUP98;NUP58;NUP37	WikiPathways_2024_Human
Module 5	Processive Synthesis on the C-strand of the Telomere	11/19	15.3672	3.10484e-07	POLD3;ACD;BLM;FEN1;PCNA;LIG1;POLD1;RPA3;RPA1;RPA2;DNA2	Reactome_Pathways_2024
Module 5	Switching of Origins to a Post-Replicative State	23/79	4.6119	3.57837e-07	CDT1;MCM7;MCM8;UBE2C;GMNN;CDC6;CCNA2;ORC5;FZR1;CDC23;ORC6;CCNE2;ORC1;UBE2S;ORC3;ORC2;CDK2;MCM3;ANAPC4;MCM4;MCM5;MCM6;MCM2	Reactome_Pathways_2024
Module 5	Positive Regulation of G2/M Transition of Mitotic Cell Cycle (GO:0010971)	12/20	16.7744	3.70016e-07	RAD51B;RRM1;CCNB1;RAD51C;CDK1;CDC7;DBF4B;FBXO5;CDC25C;DTL;CDC25A;CDC25B	GO_Biological_Process_2025
Module 5	mRNA surveillance pathway	27/98	4.27717	3.78088e-07	HBS1L;DAZAP1;EIF4A3;CSTF2;CASC3;NXT2;GLE1;PNN;PPP1CC;PABPN1;CLP1;PCF11;PPP2R5E;PPP2R3C;MAGOH;PABPC4L;CSTF1;CPSF4;CPSF7;CPSF6;CPSF3;PYM1;PPP2R5D;MAGOHB;NUDT21;PPP2R2D;RNPS1	KEGG_2021_Human
Module 5	Late Phase of HIV Life Cycle	33/145	3.31878	4.3001e-07	NUP205;NUP107;SEH1L;GTF2E1;NUP160;XPO1;NUP85;NUP42;POLR2B;NUP62;RCC1;NUP88;NUP43;POLR2H;POLR2I;RAE1;POLR2K;NDC1;RANBP1;TBP;NUP155;SSRP1;NUP93;ERCC3;NUP50;TAF4B;NUP35;NUP54;NUP98;TAF5;TAF3;NUP58;NUP37	Reactome_Pathways_2024
Module 5	Glycolysis	22/74	4.74884	4.53366e-07	NDC1;NUP205;NUP107;SEH1L;NUP155;PPP2R5D;ENO1;ENO2;NUP160;NUP93;NUP42;NUP85;NUP50;NUP62;NUP35;NUP54;NUP43;NUP88;NUP98;RAE1;NUP58;NUP37	Reactome_Pathways_2024
Module 5	Termination of Translesion DNA Synthesis	14/32	8.7037	4.70116e-07	RFC5;RFC3;PCNA;RFC4;RFC2;RPA1;RPA2;POLD3;POLD1;POLE2;RPA3;POLE3;PCLAF;POLE	Reactome_Pathways_2024
Module 5	Regulation of DNA-templated DNA Replication (GO:0090329)	11/17	20.4918	5.11122e-07	CDT1;TIPIN;MCM7;ARTN;GMNN;MCM3;MCM4;WRNIP1;MCM5;MCM6;TICRR	GO_Biological_Process_2025
Module 5	Dual Incision in TC-NER	20/63	5.21688	5.22275e-07	RFC5;RFC3;RFC4;PCNA;RFC2;RPA1;RPA2;PRPF19;POLD3;ERCC3;POLR2B;POLD1;POLE2;RPA3;POLE3;ERCC5;POLR2H;POLR2I;POLE;POLR2K	Reactome_Pathways_2024
Module 5	Regulation of DNA Replication (GO:0006275)	23/73	5.16702	5.77022e-07	CDT1;USP37;PCNA;ATAD5;DSCC1;FAF1;GMNN;NUCKS1;ESCO2;CDC6;CDC25A;UCHL5;EREG;CCNA2;ORC5;WEE1;CHRAC1;ORC3;CDK2;POLE3;FBXO5;DNA2;OBI1	GO_Biological_Process_2025
Module 5	Replacement of Protamines by Nucleosomes in the Male Pronucleus	12/24	11.1805	6.45219e-07	H2BC9;H2BC13;H2BC14;H2BC15;H2BC26;H2BC5;H2BC3;H2BC21;H2BC4;H2BC11;H4C1;H2BC17	Reactome_Pathways_2024
Module 5	Mitotic Spindle Assembly (GO:0090307)	18/47	6.95864	6.92932e-07	UHRF1;SPICE1;CDCA8;KIF23;KIF11;AURKB;MZT1;KIF15;TPX2;RACGAP1;KIF2A;INCENP;KIFC1;PRC1;CHEK2;KIF4A;BIRC5;CEP192	GO_Biological_Process_2025
Module 5	Positive Regulation of Chromosome Organization (GO:2001252)	18/47	6.95864	6.92932e-07	FEN1;MRE11;NVL;NCAPH2;NCAPG2;NCAPG;SMC4;AURKB;NCAPH;KAT5;ARTN;RAD21;CDK1;NEK2;MAPKAPK5;NCAPD2;NCAPD3;MAP3K4	GO_Biological_Process_2025
Module 5	ESR-mediated Signaling	39/192	2.87535	7.46102e-07	CHD1;H2AC18;H2AC14;H2BC26;XPO1;KAT5;GNG5;POLR2B;RAD21;H2BC21;H4C1;POLR2H;KPNA2;POLR2I;POLR2K;H2BC9;MED1;TLE3;TBP;H2BC5;H2AC4;H2BC3;PTGES3;H2BC4;H2BC17;MMP9;USF1;EREG;H2BC13;PPP5C;STAG1;H2BC14;H2BC15;GPAM;H2AC20;H2BC11;BCL2;GNB3;EBAG9	Reactome_Pathways_2024
Module 5	Transcription-Coupled Nucleotide Excision Repair (TC-NER)	22/76	4.57246	7.50947e-07	RFC5;RFC3;RFC4;PCNA;LIG1;RFC2;RPA1;RPA2;XRCC1;PRPF19;POLD3;ERCC3;POLR2B;POLD1;POLE2;RPA3;POLE3;ERCC5;POLR2H;POLR2I;POLE;POLR2K	Reactome_Pathways_2024
Module 5	Signal Transduction in Response to DNA Damage (GO:0042770)	24/80	4.81537	7.82371e-07	H2AX;RBM38;PAXIP1;CRADD;DONSON;CDC5L;FOXM1;PRPF19;PIDD1;BRIP1;TFAP4;KAT5;ARTN;CHEK2;CHEK1;E2F1;INTS7;TOPBP1;CLSPN;GTSE1;ATRIP;E2F7;RHNO1;RAD9A	GO_Biological_Process_2025
Module 5	RUNX1 Regulates Genes Involved in Megakaryocyte Differentiation and Platelet Function	20/65	4.98448	9.17459e-07	H2BC9;H2BC5;H2AC4;H2BC3;ITGA2B;H2BC4;ASH2L;H2BC17;H2AC18;H2BC13;H2BC14;H2AC14;H2BC26;H2BC15;RBBP5;H2BC21;H2AC20;H2BC11;WDR5;H4C1	Reactome_Pathways_2024
Module 5	Nucleotide Excision Repair WP4753	17/44	7.05532	9.32982e-07	RFC5;RFC3;PCNA;RFC4;LIG1;RFC2;RPA1;RPA2;RAD23A;POLD3;ERCC3;POLD1;POLE2;RPA3;POLE3;ERCC5;POLE	WikiPathways_2024_Human
Module 5	Cell Cycle G2/M Phase Transition (GO:0044839)	17/43	7.32708	9.68489e-07	PLK1;FOXM1;PKMYT1;CDC25C;MASTL;AURKB;CDC25A;AURKA;CDC25B;CCNA2;CCNB1;WEE1;MELK;CHEK2;CDK2;CDK1;BIRC5	GO_Biological_Process_2025
Module 5	Mitotic G2/M Transition Checkpoint (GO:0044818)	18/48	6.72632	9.76825e-07	BARD1;BLM;MRE11;PLK1;DONSON;BRCA1;CDC6;INIP;TICRR;FZR1;ARTN;CHEK1;RBBP8;CDK1;CLSPN;TOPBP1;ZNF367;DTL	GO_Biological_Process_2025
Module 5	RNA transport	39/186	2.9937	1.14542e-06	NUP205;NUP107;POP7;SEH1L;RPP30;EIF4A3;CASC3;NXT2;NUP160;GLE1;PNN;XPO1;NUP85;NUP42;MAGOH;NUP62;SUMO2;PABPC4L;NUP88;NUP43;RAE1;NDC1;UBE2I;NUP155;PYM1;THOC3;MAGOHB;NUP93;NUP50;GEMIN4;TACC3;NUP35;GEMIN6;RNPS1;NUP54;NUP98;RPP25;NUP58;NUP37	KEGG_2021_Human
Module 5	Transcriptional Regulation by E2F6	14/34	7.83248	1.15297e-06	SUZ12;PCGF6;RRM2;EED;CDC7;BRCA1;RAD51;TFDP1;RBBP4;CHEK1;E2F1;RBBP8;RBBP7;EZH2	Reactome_Pathways_2024
Module 5	Global Genome Nucleotide Excision Repair (GG-NER)	23/84	4.23272	1.17463e-06	RFC5;RFC3;RFC4;PCNA;UBE2I;LIG1;PARP1;PARP2;RFC2;ACTL6A;RPA1;RPA2;XRCC1;RAD23A;POLD3;ERCC3;POLD1;POLE2;RPA3;SUMO2;POLE3;ERCC5;POLE	Reactome_Pathways_2024
Module 5	CDC6 Association With the ORC Origin Complex	7/8	78.0723	1.17463e-06	ORC5;ORC6;ORC1;MCM8;ORC3;ORC2;CDC6	Reactome_Pathways_2024
Module 5	DNA Replication Initiation	7/8	78.0723	1.17463e-06	POLA1;PRIM2;POLA2;POLE2;PRIM1;POLE3;POLE	Reactome_Pathways_2024
Module 5	Translesion Synthesis by Y Family DNA Polymerases Bypasses Lesions on DNA Template	15/39	6.99603	1.21174e-06	RFC5;RFC3;PCNA;RFC4;RFC2;RPA1;RPA2;RCHY1;POLD3;POLD1;POLE2;RPA3;POLE3;PCLAF;POLE	Reactome_Pathways_2024
Module 5	ATM Signaling WP2516	16/40	7.46699	1.26099e-06	H2AX;MRE11;CRADD;BRCA1;CDC25C;CDC25A;PIDD1;MAPK9;CCNB1;RAD51;FANCD2;CHEK2;CHEK1;CDK2;CDK1;RAD9A	WikiPathways_2024_Human
Module 5	Mitotic G2 DNA Damage Checkpoint Signaling (GO:0007095)	14/30	9.79274	1.33344e-06	BLM;MRE11;PLK1;DONSON;BRCA1;TICRR;FZR1;ARTN;CHEK1;CDK1;CLSPN;TOPBP1;ZNF367;DTL	GO_Biological_Process_2025
Module 5	Centromere Complex Assembly (GO:0034508)	10/15	22.3423	1.42407e-06	CENPF;CENPW;MIS18A;NASP;CENPI;MIS12;HJURP;OIP5;DLGAP5;CENPC	GO_Biological_Process_2025
Module 5	Positive Regulation of Mitotic Sister Chromatid Separation (GO:1901970)	10/15	22.3423	1.42407e-06	RB1;CDC20;CDC23;ESPL1;UBE2C;INCENP;CDCA8;BIRC5;AURKB;DLGAP5	GO_Biological_Process_2025
Module 5	DNA Strand Elongation (GO:0022616)	9/12	33.4967	1.4436e-06	DCLRE1B;POLD3;POLA1;RFC3;MRE11;RFC4;MCM7;MCM3;MCM4	GO_Biological_Process_2025
Module 5	Regulation of DNA-templated DNA Replication Initiation (GO:0030174)	9/12	33.4967	1.4436e-06	CDT1;MCM7;GMNN;MCM3;MCM4;MCM5;WRNIP1;MCM6;TICRR	GO_Biological_Process_2025
Module 5	Glucose Metabolism	23/85	4.16422	1.47144e-06	NDC1;NUP205;NUP107;SEH1L;NUP155;PPP2R5D;ENO1;ENO2;NUP160;NUP93;NUP42;NUP85;NUP50;NUP62;NUP35;NUP54;NUP43;NUP88;NUP98;SLC37A4;RAE1;NUP58;NUP37	Reactome_Pathways_2024
Module 5	Pre-NOTCH Transcription and Translation	21/73	4.53021	1.56989e-06	H2BC9;H2BC5;H2AC4;NOTCH4;H2BC3;H2BC4;RBPJ;H2BC17;H2AC18;H2BC13;H2BC14;H2AC14;H2BC26;H2BC15;TFDP1;H2BC21;H2AC20;H2BC11;E2F1;H4C1;MAMLD1	Reactome_Pathways_2024
Module 5	Condensation of Prometaphase Chromosomes	8/11	29.7567	1.68092e-06	CCNB2;CCNB1;CDK1;NCAPG;NCAPD2;SMC4;NCAPH;SMC2	Reactome_Pathways_2024
Module 5	G2/M Transition of Mitotic Cell Cycle (GO:0000086)	16/40	7.46699	1.85669e-06	PLK1;FOXM1;PKMYT1;CDC25C;MASTL;CDC25A;AURKA;CDC25B;CCNA2;CCNB1;WEE1;MELK;CHEK2;CDK2;CDK1;BIRC5	GO_Biological_Process_2025
Module 5	Regulation of DNA Recombination (GO:0000018)	16/40	7.46699	1.85669e-06	MRE11;H1-10;H1-3;H1-2;RAD51AP1;H1-5;MSH6;H1-4;RAD51;MSH2;FIGNL1;SHLD2;CHEK1;SMARCAD1;USP51;KPNA2	GO_Biological_Process_2025
Module 5	Phosphorylation of Emi1	6/6	110088	1.87994e-06	CDC20;CCNB1;FZR1;PLK1;CDK1;FBXO5	Reactome_Pathways_2024
Module 5	RHO GTPases Activate PKNs	19/62	4.953	1.92193e-06	H2BC9;H2BC5;PKN3;H2AC4;H2BC3;H2BC4;CDC25C;H2BC17;H2AC18;H2BC13;H2BC14;H2AC14;H2BC26;H2BC15;H2BC21;H2AC20;H2BC11;PKN2;H4C1	Reactome_Pathways_2024
Module 5	Nucleotide excision repair	17/47	6.34875	1.93108e-06	RFC5;RFC3;PCNA;RFC4;LIG1;RFC2;RPA1;RPA2;RAD23A;POLD3;ERCC3;POLD1;POLE2;RPA3;POLE3;ERCC5;POLE	KEGG_2021_Human
Module 5	Condensed Nuclear Chromosome (GO:0000794)	13/28	9.69408	2.09456e-06	SUV39H1;NCAPH2;NCAPG2;NCAPG;TUBG1;SMC4;NCAPH;RAD51;CHEK1;RCC1;NCAPD2;RGS12;NCAPD3	GO_Cellular_Component_2025
Module 5	Regulation of Cell Cycle (GO:0051726)	56/318	2.42212	2.19956e-06	RB1;MRFAP1L2;SUV39H1;CCNF;GMNN;YEATS4;BRCA1;FOXM1;NUDT6;CKS1B;CDC20;RASSF1;CDC23;ING3;KAT5;CREB3L4;VPS72;CHEK1;PCLAF;WDR5;RCC1;PIM3;FBXO5;PIM2;DLGAP5;NANOS3;METTL3;ACTL6A;RAD23A;MASTL;UCHL5;SFRP1;CKS2;ANAPC4;KIF20B;PRR11;DTL;BEX2;RNASEH2A;ZBTB49;LIN9;FZR1;FIGNL1;RPRD1B;USP51;BRD8;KAT14;BARD1;RBM38;CDT1;PLK1;MRGBP;CDK5;ARTN;CDK2;CDKN3	GO_Biological_Process_2025
Module 5	Regulation of Chromosome Segregation (GO:0051983)	13/27	10.3871	2.36072e-06	RMI2;NCAPH2;NCAPG2;NCAPG;CDC6;SMC4;NCAPH;PPP2R2D;KIF2C;NCAPD2;NCAPD3;BUB1;RAD18	GO_Biological_Process_2025
Module 5	Heterochromatin Formation (GO:0031507)	22/73	4.84222	2.37868e-06	H2AX;RB1;H2AZ1;HDAC2;EED;UHRF1;H2AC4;METTL3;CBX1;HMGB1;LMNB2;LMNB1;H2AC11;H2AC12;SMCHD1;H2AC14;H2AC25;H2AC20;H2AC21;POLE3;SMARCAD1;EZH2	GO_Biological_Process_2025
Module 5	Positive Regulation of Cell Cycle G2/M Phase Transition (GO:1902751)	12/23	12.1976	2.40526e-06	RAD51B;RRM1;CCNB1;RAD51C;CDK1;CDC7;DBF4B;FBXO5;CDC25C;DTL;CDC25A;CDC25B	GO_Biological_Process_2025
Module 5	miRNA Regulation Of DNA Damage Response WP1530	21/69	4.9088	2.50477e-06	RB1;H2AX;MRE11;RPA2;BRCA1;CDC25C;CDC25A;PIDD1;CCNB2;CCNB1;RAD51;CCNE2;CDK5;FANCD2;CHEK2;CHEK1;CDK2;E2F1;CDK1;ATRIP;RAD9A	WikiPathways_2024_Human
Module 5	DNA Damage Response WP707	21/69	4.9088	2.50477e-06	RB1;H2AX;MRE11;RPA2;BRCA1;CDC25C;CDC25A;PIDD1;CCNB2;CCNB1;RAD51;CCNE2;CDK5;FANCD2;CHEK2;CHEK1;CDK2;E2F1;CDK1;ATRIP;RAD9A	WikiPathways_2024_Human
Module 5	Attachment of Mitotic Spindle Microtubules to Kinetochore (GO:0051315)	10/16	18.6175	3.06998e-06	CDT1;SEH1L;MIS12;NUF2;KIF2C;SKA3;NDC80;SKA1;CENPC;SKA2	GO_Biological_Process_2025
Module 5	Mitotic Chromosome Condensation (GO:0007076)	10/16	18.6175	3.06998e-06	CDCA5;NCAPH2;PLK1;NCAPG;NCAPD2;KMT5A;NCAPD3;TENT4A;SMC4;NCAPH	GO_Biological_Process_2025
Module 5	FBXL10 Enhancement Of MAP ERK Signaling In DLBCL WP4553	14/33	8.24516	3.16429e-06	H2AX;SUZ12;H2AZ1;H3C8;EED;H3C13;H3C11;H3C12;H3C1;H3C10;H3C7;H3C6;H3-3B;EZH2	WikiPathways_2024_Human
Module 5	ISG15 Antiviral Mechanism	21/76	4.2824	3.24805e-06	NDC1;NUP205;NUP107;SEH1L;NUP155;EIF4A3;NUP160;NUP93;NUP42;NUP85;NUP50;NUP62;NUP35;NUP54;NUP43;NUP88;NUP98;KPNA2;RAE1;NUP58;NUP37	Reactome_Pathways_2024
Module 5	Microtubule (GO:0005874)	39/194	2.83794	3.39199e-06	KIF14;TUBD1;KIF11;SKA3;TTL;SKA1;AURKB;SKA2;KIF15;AURKA;FAM110A;CRHBP;TUBA1C;HAUS8;KIF21A;DNM1L;CCT5;CDK5RAP2;PLK1;KIF24;KIF23;KIF22;TUBB4B;DNM3;PSRC1;KIF2A;FAM161A;CDK5;KIFC1;KIF16B;PRC1;KIF4A;CDK1;BIRC5;KIF2C;KIF20A;KIF20B;METAP1;TUBA8	GO_Cellular_Component_2025
Module 5	Homologous Recombination (GO:0035825)	8/10	44.6375	3.40499e-06	BARD1;BRIP1;MRE11;UHRF1;RBBP8;NUCKS1;BRCA1;TOPBP1	GO_Biological_Process_2025
Module 5	Mitotic DNA Replication (GO:1902969)	8/10	44.6375	3.40499e-06	GINS1;POLA1;MCM7;GINS3;MCM3;MCM4;MCM6;TK1	GO_Biological_Process_2025
Module 5	Maternal to Zygotic Transition (MZT)	26/109	3.5188	3.62646e-06	UHRF1;EIF4A3;H2AC18;UNG;H2AC14;H2BC26;PABPN1;H2BC21;H4C1;KPNA2;TEAD4;H2BC9;H2BC5;H2AC4;H2BC3;H2BC4;TUBB4B;H2BC17;H2BC13;CPEB1;H2BC14;CNOT7;H2BC15;H2AC20;H2BC11;BIRC5	Reactome_Pathways_2024
Module 5	Primary Ovarian Insufficiency WP5461	31/136	3.32266	4.06769e-06	BLM;NUP107;MCM8;MCMDC2;HMMR;WDR62;BRCA2;RCBTB1;RECQL4;EXO1;NUP43;FANCI;MGME1;FANCM;XRCC4;FANCL;NANOS3;XRCC2;TWNK;FANCA;FANCC;MLH1;BMP6;SGO2;DIAPH2;CPEB1;RAD51;STAG3;RFWD3;DMC1;HROB	WikiPathways_2024_Human
Module 5	HDR Through MMEJ (alt-NHEJ)	8/12	22.3163	4.57495e-06	POLQ;FEN1;MRE11;PARP1;PARP2;RBBP8;XRCC1;BRCA2	Reactome_Pathways_2024
Module 5	Integrated Cancer Pathway WP1971	16/44	6.39888	4.75902e-06	RB1;BARD1;BLM;MRE11;PLK1;BRCA1;CDC25A;CDC25B;MSH6;MSH2;CHEK2;CHEK1;CDK2;E2F1;BCL2;CDK1	WikiPathways_2024_Human
Module 5	Regulation Sister Chromatid Sep At Meta-Anaphase Transition WP4240	9/14	20.0958	5.58355e-06	CDC20;STAG1;ESPL1;PTTG1;RAD21;BUB1B;BUB3;BUB1;MAD2L1	WikiPathways_2024_Human
Module 5	TP53 Regulates Transcription of Cell Cycle Genes	16/49	5.42787	6.16606e-06	PCNA;CDC25C;AURKA;CCNA2;CCNB1;RBL1;TFDP1;CNOT7;CCNE2;CENPJ;CDK2;E2F1;CDK1;E2F4;E2F7;E2F8	Reactome_Pathways_2024
Module 5	ATR Signaling WP3875	8/11	29.7567	6.28003e-06	RPA3;CHEK1;RPA1;RPA2;TOPBP1;RAD9B;ATRIP;RAD9A	WikiPathways_2024_Human
Module 5	Processing of Intronless Pre-mRNAs	10/20	11.1681	7.14751e-06	CPSF4;NUDT21;CPSF7;CPSF6;PABPN1;CLP1;PCF11;CPSF3;CSTF2;CSTF1	Reactome_Pathways_2024
Module 5	Kinesins	18/62	4.58262	9.22379e-06	KIF23;KIF11;KIF22;TUBB4B;KIF15;TUBA1C;KIF18A;KIF18B;KIF2A;RACGAP1;KIF16B;KIFC1;KIF4A;KIF21A;KIF2C;KIF20A;KIF20B;TUBA8	Reactome_Pathways_2024
Module 5	Nuclear Pore Organization (GO:0006999)	9/14	20.0958	9.75856e-06	NDC1;NUP93;NUP205;NUP107;SEH1L;NUP35;NUP54;NUP98;TMEM170A	GO_Biological_Process_2025
Module 5	APC C-mediated Degradation of Cell Cycle Proteins	20/75	4.07598	1.07765e-05	RB1;UBE2C;PLK1;BUB1B;AURKB;AURKA;CDC20;CCNA2;CCNB1;FZR1;CDC23;PTTG1;UBE2S;CDK2;CDK1;ANAPC4;NEK2;FBXO5;BUB3;MAD2L1	Reactome_Pathways_2024
Module 5	Regulation of Mitotic Cell Cycle	20/75	4.07598	1.07765e-05	RB1;UBE2C;PLK1;BUB1B;AURKB;AURKA;CDC20;CCNA2;CCNB1;FZR1;CDC23;PTTG1;UBE2S;CDK2;CDK1;ANAPC4;NEK2;FBXO5;BUB3;MAD2L1	Reactome_Pathways_2024
Module 5	Positive Regulation of Spindle Checkpoint (GO:0090232)	8/11	29.7567	1.10296e-05	GEN1;INCENP;XRCC3;BIRC5;CDCA8;KNL1;NDC80;MAD2L1	GO_Biological_Process_2025
Module 5	Protein Localization to Kinetochore (GO:0034501)	8/11	29.7567	1.10296e-05	MTBP;ZWILCH;CDK1;KNTC1;TTK;BUB3;KNL1;SPDL1	GO_Biological_Process_2025
Module 5	Regulation of Chromosome Separation (GO:1905818)	8/11	29.7567	1.10296e-05	PLSCR1;NCAPH2;NCAPG2;NCAPG;NCAPD2;NCAPD3;SMC4;NCAPH	GO_Biological_Process_2025
Module 5	CENP-A Containing Chromatin Assembly (GO:0034080)	6/6	110088	1.21048e-05	CENPW;MIS18A;NASP;CENPI;HJURP;OIP5	GO_Biological_Process_2025
Module 5	Chromatin Remodeling at Centromere (GO:0031055)	6/6	110088	1.21048e-05	CENPW;MIS18A;NASP;CENPI;HJURP;OIP5	GO_Biological_Process_2025
Module 5	Mitotic Cytokinesis (GO:0000281)	19/62	4.953	1.2288e-05	PLK1;CKAP2;CDCA8;KIF23;CENPA;AURKB;ANLN;ESPL1;RACGAP1;VPS72;INCENP;KIF4A;STMN1;BIRC5;KIF20A;STAMBP;CNTROB;ECT2;CEP55	GO_Biological_Process_2025
Module 5	Removal of the Flap Intermediate From the C-strand	9/17	12.5578	1.32132e-05	POLD3;ACD;FEN1;PCNA;POLD1;RPA3;RPA1;RPA2;DNA2	Reactome_Pathways_2024
Module 5	Pre-NOTCH Expression and Processing	22/89	3.68265	1.33372e-05	H2BC9;H2BC5;H2AC4;NOTCH4;H2BC3;H2BC4;ATP2A1;RBPJ;H2BC17;H2AC18;H2BC13;H2BC14;H2AC14;H2BC26;H2BC15;TFDP1;H2BC21;H2AC20;H2BC11;E2F1;H4C1;MAMLD1	Reactome_Pathways_2024
Module 5	Negative Regulation of Double-Strand Break Repair (GO:2000780)	14/36	7.11966	1.63103e-05	RMI2;MRE11;PARPBP;MAGEF1;PLK1;CGAS;FANCB;SMCHD1;KAT5;SHLD3;SHLD2;AUNIP;KMT5A;CYREN	GO_Biological_Process_2025
Module 5	Cellular Responses to Stress	102/787	1.69685	1.78186e-05	RB1;CRTC2;NUP107;MRE11;UBE2D2;ETS2;H2AC18;CDC23;H2AC14;KAT5;CREB3L4;RPS6KA1;H4C1;RPS10;MED1;MAP2K4;H2AC4;NUP93;CCNE2;ANAPC4;MAPKAPK5;NUP98;NUP205;SEH1L;HSPA4L;CUL2;NRF1;NUP160;NUP85;NUP88;RPL39L;HSPA9;ACD;NUP155;UBE2C;CBX2;NR1D1;HSPA2;PALB2;H1-3;H1-2;H1-5;H1-4;UBE2S;H2AC20;CDK2;BCL2;EZH2;TUBA8;GSK3A;BRCA1;LMNB1;TUBA1C;H2BC26;XPO1;H2BC21;NUP62;NDC1;MIOS;EED;H2BC17;CCNA2;H2BC13;H2BC14;H2BC15;TFDP1;…	Reactome_Pathways_2024
Module 5	mRNA Processing WP411	28/125	3.24405	1.96271e-05	SFSWAP;CSTF2;U2AF1;PPM1G;PABPN1;CLP1;TRA2B;CSTF1;SRSF10;SF3A3;CPSF4;SF3A2;CPSF3;METTL3;LSM2;HNRNPL;PRPF4;NUDT21;SNRNP40;PHF5A;PRPF3;SNRPE;RNPS1;CLASRP;SRSF6;RBMX;SUGP2;SNRPB	WikiPathways_2024_Human
Module 5	Regulation of Mitotic Nuclear Division (GO:0007088)	18/58	5.04198	1.98151e-05	BORA;CDCA2;KNL1;MKI67;CDC25C;FBXO43;PKMYT1;EREG;AURKA;CCNB1;CHEK1;NUP62;RCC1;NEK2;PHIP;FBXO5;KIF20B;CDK5RAP2	GO_Biological_Process_2025
Module 5	Double-Strand Break Repair via Nonhomologous End Joining (GO:0006303)	16/47	5.77869	2.04125e-05	DCLRE1B;DCLRE1A;MRE11;XRCC4;XRCC5;PLK1;HMGB2;RNF8;HMGB1;PRPF19;POLA1;ASTE1;ARTN;TOPBP1;CYREN;RHNO1	GO_Biological_Process_2025
Module 5	G2 M DNA Replication Checkpoint	5/5	91740	2.15977e-05	CCNB2;CCNB1;WEE1;CDK1;PKMYT1	Reactome_Pathways_2024
Module 5	Cohesin Complex Cornelia De Lange Syndrome WP5117	13/34	6.92208	2.93027e-05	CDCA5;PLK1;PPP2R5D;ESCO2;AURKB;SGO1;SGO2;PTTG1;STAG3;ESPL1;PPP2R5E;RAD21;CDK1	WikiPathways_2024_Human
Module 5	DNA Damage Checkpoint Signaling (GO:0000077)	14/38	6.52564	3.43227e-05	H2AX;DONSON;CDC5L;PRPF19;BRIP1;CHEK2;CHEK1;E2F1;INTS7;CLSPN;TOPBP1;ATRIP;RAD9A;RHNO1	GO_Biological_Process_2025
Module 5	ESC/E(Z) Complex (GO:0035098)	8/13	17.8521	3.77141e-05	SUZ12;HDAC2;RBBP4;EED;MTF2;RBBP7;EZH2;PHF19	GO_Cellular_Component_2025
Module 5	Negative Regulation of Double-Strand Break Repair via Homologous Recombination (GO:2000042)	11/24	9.45413	3.85741e-05	RMI2;SMCHD1;PARPBP;KAT5;SHLD3;SHLD2;MAGEF1;PLK1;CGAS;FANCB;KMT5A	GO_Biological_Process_2025
Module 5	Microtubule Depolymerization (GO:0007019)	9/16	14.3526	4.1744e-05	KIF18A;KIF18B;KIF2A;STMN1;KIF14;KIF24;STMN3;KIF2C;CKAP5	GO_Biological_Process_2025
Module 5	Translesion Synthesis by POLH	9/19	10.0452	4.23946e-05	RFC5;RFC3;PCNA;RFC4;RFC2;RPA3;RPA1;RPA2;RCHY1	Reactome_Pathways_2024
Module 5	Positive Regulation of DNA Recombination (GO:0045911)	17/56	4.88125	5.46741e-05	PAXIP1;PARP1;RNF8;YEATS4;FANCB;RAD51AP1;ING3;MRGBP;KAT5;VPS72;ARTN;SHLD3;SHLD2;PELI1;TIMELESS;BRD8;WRAP53	GO_Biological_Process_2025
Module 5	Positive Regulation of Double-Strand Break Repair (GO:2000781)	23/94	3.63457	5.85947e-05	SMARCD1;SLF1;MRE11;SLF2;PARP1;KDM4D;RNF8;YEATS4;FANCB;FOXM1;RAD51AP1;SMCHD1;ING3;MRGBP;KAT5;VPS72;ARTN;SHLD3;SHLD2;PELI1;TIMELESS;BRD8;WRAP53	GO_Biological_Process_2025
Module 5	Gastric Cancer Network 2 WP2363	12/31	7.05866	6.11222e-05	TOP2A;FANCI;RFC3;RFC4;UBE2C;DSCC1;UBE2T;ATAD2;CEBPZ;CHTF18;LBR;LMNB2	WikiPathways_2024_Human
Module 5	ATM Signaling In Development And Disease WP3878	15/47	5.24473	6.11222e-05	MRE11;RIF1;RNF8;LMNB2;AURKB;CDC25A;MAPK13;PPP5C;KAT5;CDK5;CHEK2;CHEK1;CDK2;RBBP8;BUB1	WikiPathways_2024_Human
Module 5	Positive Regulation of Mitotic Metaphase/Anaphase Transition (GO:0045842)	8/13	17.8521	6.41444e-05	RB1;CDC20;CDC23;ESPL1;UBE2C;SKA3;SKA1;DLGAP5	GO_Biological_Process_2025
Module 5	Regulation of Attachment of Spindle Microtubules to Kinetochore (GO:0051988)	8/13	17.8521	6.41444e-05	SPAG5;RACGAP1;ZWILCH;CDK1;KNTC1;NEK2;ECT2;KNSTRN	GO_Biological_Process_2025
Module 5	Protein Ubiquitination	19/77	3.66905	6.47641e-05	H2BC9;PCNA;H2BC5;UBE2C;UBE2D2;H2BC3;H2BC4;UBE2G1;UBE2J2;H2BC17;H2BC13;H2BC14;H2BC15;UBE2S;UBE2T;H2BC11;HLTF;LEO1;RAD18	Reactome_Pathways_2024
Module 5	Establishment of Spindle Orientation (GO:0051294)	14/40	6.02301	6.53848e-05	GPSM2;HDAC3;NDE1;PLK1;SKA3;CENPA;SKA1;NDC80;SKA2;KAT5;SAPCD2;SPDL1;CDK5RAP2;MAD2L1	GO_Biological_Process_2025
Module 5	U2-type Spliceosomal Complex (GO:0005684)	22/91	3.57551	6.57189e-05	SF3A3;SF3A2;EIF4A3;CDC5L;CASC3;PRPF19;LSM5;MAGOHB;LSM3;LSM2;GCFC2;PRPF4;PRPF39;SNRNP40;LSM6;PHF5A;PRPF3;SNRPE;BUD13;LUC7L2;RBM22;SNRPB	GO_Cellular_Component_2025
Module 5	Positive Regulation of Chromosome Condensation (GO:1905821)	6/7	66.8785	6.78398e-05	NCAPH2;NCAPG2;NCAPG;NCAPD3;SMC4;NCAPH	GO_Biological_Process_2025
Module 5	Regulation of Chromosome Condensation (GO:0060623)	6/7	66.8785	6.78398e-05	NCAPH2;NCAPG2;NCAPG;NCAPD3;SMC4;NCAPH	GO_Biological_Process_2025
Module 5	Orc1 Removal From Chromatin	16/58	4.26266	6.89114e-05	CDT1;MCM7;MCM8;CDC6;CCNA2;ORC5;ORC6;ORC1;ORC3;ORC2;CDK2;MCM3;MCM4;MCM5;MCM6;MCM2	Reactome_Pathways_2024
Module 5	DNA Biosynthetic Process (GO:0071897)	9/17	12.5578	7.50007e-05	POLD3;POLA1;RFC3;RRM1;POLD1;WRNIP1;TYMS;HROB;POLE	GO_Biological_Process_2025
Module 5	DNA Conformation Change (GO:0071103)	9/17	12.5578	7.50007e-05	TOP2A;BLM;ERCC3;TOP3A;HMGB2;HMGB3;MTERF1;HMGB1;DNA2	GO_Biological_Process_2025
Module 5	Mitotic Spindle Elongation (GO:0000022)	7/10	26.0213	7.77302e-05	RACGAP1;INCENP;PRC1;KIF4A;BIRC5;CDCA8;KIF23	GO_Biological_Process_2025
Module 5	Mitotic Spindle Midzone Assembly (GO:0051256)	7/10	26.0213	7.77302e-05	RACGAP1;INCENP;PRC1;KIF4A;BIRC5;CDCA8;KIF23	GO_Biological_Process_2025
Module 5	Positive Regulation of Mitotic Cell Cycle Spindle Assembly Checkpoint (GO:0090267)	7/10	26.0213	7.77302e-05	GEN1;INCENP;XRCC3;BIRC5;CDCA8;NDC80;MAD2L1	GO_Biological_Process_2025
Module 5	Protein Localization to Condensed Chromosome (GO:1903083)	7/10	26.0213	7.77302e-05	MTBP;ZWILCH;CDK1;TTK;BUB3;KNL1;SPDL1	GO_Biological_Process_2025
Module 5	Translesion Synthesis by REV1	8/16	11.1557	8.33041e-05	RFC5;RFC3;PCNA;RFC4;RFC2;RPA3;RPA1;RPA2	Reactome_Pathways_2024
Module 5	Membraneless Organelle Assembly (GO:0140694)	29/139	2.96254	8.45355e-05	GRB7;HDAC3;MIS12;AUP1;CENPA;CENPC;HAUS8;CHEK2;NUP62;RCC1;NEK2;E2F4;SAC3D1;DLGAP5;CENPW;TMOD4;HAUS3;HAUS6;HAUS5;LSM3;HAUS2;HAUS1;BSCL2;ANLN;CENPF;WNK3;TUBGCP5;TUBGCP3;CEP85	GO_Biological_Process_2025
Module 5	RNA degradation	20/79	3.79881	8.6351e-05	HSPA9;BTG3;PNPT1;ENO1;ENO2;TENT4A;LSM5;LSM3;LSM2;EXOSC10;CNOT7;LSM6;EXOSC9;EXOSC8;PABPC4L;EXOSC3;EXOSC2;CNOT9;DCP2;MPHOSPH6	KEGG_2021_Human
Module 5	Spliceosome	30/150	2.80949	8.6351e-05	TCERG1;EIF4A3;U2AF1;PRPF19;USP39;PQBP1;TRA2B;MAGOH;SRSF10;SF3A3;SF3A2;CDC5L;THOC3;HSPA2;WBP11;LSM5;MAGOHB;LSM3;LSM2;PRPF4;SNRNP40;LSM6;PHF5A;PRPF3;PPIH;SNRPE;SRSF6;RBMX;SNRPB;RBM22	KEGG_2021_Human
Module 5	Oocyte meiosis	27/129	2.9722	9.84837e-05	CALML4;FBXO43;PKMYT1;AURKA;CDC20;PPP1CC;CCNB2;CCNB1;CDC23;PTTG1;PPP2R5E;RPS6KA1;FBXO5;BUB1;PLK1;PPP2R5D;CDC25C;MAPK13;SGO1;CPEB1;CCNE2;STAG3;ESPL1;CDK2;CDK1;ANAPC4;MAD2L1	KEGG_2021_Human
Module 5	Regulation of Double-Strand Break Repair (GO:2000779)	22/91	3.57551	0.000106776	SMARCD1;SLF1;MRE11;SLF2;YEATS4;DEK;FOXM1;RAD51AP1;ING3;MRGBP;RAD51;KAT5;VPS72;ARTN;FIGNL1;SHLD2;CHEK1;TIMELESS;USP51;BRD8;ATRIP;WRAP53	GO_Biological_Process_2025
Module 5	Positive Regulation of Double-Strand Break Repair via Homologous Recombination (GO:1905168)	14/42	5.59219	0.000114157	PARP1;RNF8;YEATS4;FANCB;RAD51AP1;ING3;MRGBP;KAT5;VPS72;ARTN;PELI1;TIMELESS;BRD8;WRAP53	GO_Biological_Process_2025
Module 5	DNA Replication-Dependent Chromatin Assembly (GO:0006335)	5/5	91740	0.000114157	CHAF1B;CHAF1A;NASP;RBBP4;ASF1B	GO_Biological_Process_2025
Module 5	Resolution of DNA Recombination Intermediates (GO:0071139)	5/5	91740	0.000114157	GEN1;RMI2;RMI1;TOP3A;XRCC3	GO_Biological_Process_2025
Module 5	Amyloid Fiber Formation	19/80	3.48803	0.000114981	H2AZ1;H2BC9;H2BC5;H2AC4;H2BC3;H2BC4;H2BC17;H2AC18;APH1A;GGA2;H2BC13;H2BC14;H2AC14;H2BC26;H2BC15;H2BC21;H2AC20;H2BC11;H4C1	Reactome_Pathways_2024
Module 5	Metalloprotease DUBs	11/31	6.14284	0.000116611	H2AC11;BARD1;H2AC12;H2AC14;H2AC25;H2AC4;H2AC20;H2AC21;BRCA1;STAMBP;H2AC18	Reactome_Pathways_2024
Module 5	RMTs Methylate Histone Arginines	14/48	4.60382	0.000117726	SMARCD1;H2AC4;ACTL6A;H2AC18;H2AC11;H2AC12;H2AC14;H2AC25;H2AC20;H2AC21;WDR5;H4C1;RBBP7;JAK2	Reactome_Pathways_2024
Module 5	Signaling by Nuclear Receptors	43/270	2.13338	0.000126615	HDAC3;CHD1;H2AC18;H2AC14;XPO1;H2BC26;KAT5;GNG5;POLR2B;RAD21;H2BC21;RDH14;H4C1;POLR2H;KPNA2;POLR2I;POLR2K;ABCA1;H2BC9;MED1;TLE3;TBP;H2BC5;H2BC3;PTGES3;H2AC4;H2BC4;H2BC17;MMP9;USF1;EREG;H2BC13;PPP5C;STAG1;H2BC14;H2BC15;FABP5;GPAM;H2AC20;H2BC11;BCL2;GNB3;EBAG9	Reactome_Pathways_2024
Module 5	Cell Cycle G1/S Phase Transition (GO:0044843)	18/66	4.19982	0.000126877	USP37;CCNF;CUL2;CDC7;CDC25A;CCNA2;CCNB2;NPAT;CCNB1;DBF4;CCNE2;RPS6KB1;CDK2;CDK1;RCC1;PIM2;POLE;CDKN3	GO_Biological_Process_2025
Module 5	DNA Synthesis Involved in DNA Repair (GO:0000731)	11/27	7.68023	0.000130234	POLD3;POLA1;RFC3;RRM1;PCNA;POLD1;PCLAF;WRNIP1;HROB;POLE;DTL	GO_Biological_Process_2025
Module 5	Spliceosomal snRNP Complex (GO:0097525)	16/56	4.47628	0.000134405	SF3A3;SF3A2;LSM5;LSM3;LSM2;PRPF4;PRPF39;SNRNP40;SART3;LSM6;PHF5A;PPIH;SNRPE;BUD13;LUC7L2;SNRPB	GO_Cellular_Component_2025
Module 5	Mitotic Spindle Microtubule (GO:1990498)	8/15	12.7501	0.000136547	HAUS8;HAUS3;HAUS6;HAUS5;TUBG1;HAUS2;SKA1;HAUS1	GO_Cellular_Component_2025
Module 5	RNA Biosynthetic Process (GO:0032774)	27/128	3.00179	0.000139289	PRIM2;PRIM1;TTF2;TTF1;EXOSC10;PABPN1;CREB3L4;EXOSC9;EXOSC8;E2F1;MTERF1;EXOSC3;EXOSC2;TBP;DNTTIP2;HNRNPL;ISG20;PRPF4;POLA1;POLA2;PPP5C;SNRNP40;PDE10A;HNRNPF;RNPS1;TAF5;PTMA	GO_Biological_Process_2025
Module 5	Translesion Synthesis by POLI	8/17	9.91565	0.00014195	RFC5;RFC3;PCNA;RFC4;RFC2;RPA3;RPA1;RPA2	Reactome_Pathways_2024
Module 5	Translesion Synthesis by POLK	8/17	9.91565	0.00014195	RFC5;RFC3;PCNA;RFC4;RFC2;RPA3;RPA1;RPA2	Reactome_Pathways_2024
Module 5	Cellular Responses to Stimuli	108/887	1.57756	0.00014195	RB1;CRTC2;NUP107;MRE11;UBE2D2;ETS2;H2AC18;CDC23;H2AC14;KAT5;CREB3L4;RPS6KA1;H4C1;RPS10;MED1;MAP2K4;H2AC4;NUP93;CCNE2;ANAPC4;MT1G;MAPKAPK5;NUP98;MT1E;NUP205;SEH1L;HSPA4L;CUL2;NRF1;NUP160;NUP85;NUP88;RPL39L;HSPA9;ACD;NUP155;UBE2C;CBX2;NR1D1;HSPA2;PALB2;H1-3;H1-2;H1-5;H1-4;UBE2S;H2AC20;CDK2;BCL2;GNB3;EZH2;TUBA8;GSK3A;BRCA1;LMNB1;TUBA1C;H2BC26;XPO1;H2BC21;NUP62;NDC1;MIOS;EED;PDE4D;H2BC17;CCNA2;H2BC13…	Reactome_Pathways_2024
Module 5	Inhibition of Replication Initiation of Damaged DNA by RB1 E2F1	7/13	13.0085	0.000153156	RB1;PRIM2;POLA1;POLA2;TFDP1;PRIM1;E2F1	Reactome_Pathways_2024
Module 5	Nucleus Organization (GO:0006997)	16/55	4.59131	0.000167983	NDC1;NUP205;SEH1L;NUP155;TMEM170A;LMNB2;LMNB1;NUP93;PYGO2;DES;REEP4;CHMP1B;NUP35;NUP54;NUP98;CEP55	GO_Biological_Process_2025
Module 5	Positive Regulation of DNA Metabolic Process (GO:0051054)	24/108	3.20534	0.00017724	H2AX;CDT1;ACD;MRE11;PCNA;ATAD5;NVL;FAF1;ACTL6A;RNF8;BRCA1;CDC25A;UCHL5;AURKB;EREG;SMCHD1;WEE1;ARTN;CDK2;NEK2;MAPKAPK5;DNA2;MAP3K4;WRAP53	GO_Biological_Process_2025
Module 5	Kinetochore Organization (GO:0051383)	7/11	19.5149	0.000178417	CENPF;CENPW;CENPH;MIS12;NUF2;DLGAP5;CENPC	GO_Biological_Process_2025
Module 5	Positive Regulation of Mitotic Cytokinesis (GO:1903490)	7/11	19.5149	0.000178417	INCENP;NUP62;BIRC5;CDCA8;ECT2;KIF20B;AURKB	GO_Biological_Process_2025
Module 5	Regulation of Cytokinesis (GO:0032465)	20/81	3.67386	0.000189036	PLK1;KIF14;CCP110;KIF23;CDC6;MYO19;AURKB;CDC25B;AURKA;RACGAP1;PRC1;CSPP1;PKN2;KIF20A;KIF20B;ECT2;ZNF367;GIT1;E2F7;E2F8	GO_Biological_Process_2025
Module 5	Factors Involved in Megakaryocyte Development and Platelet Production	29/158	2.52356	0.000193571	HDAC2;KIF11;KIF15;AKAP1;DOCK10;TUBA1C;RACGAP1;KIF21A;JAK2;KIF23;KIF22;TUBB4B;RBSN;CABLES2;RAD51B;KIF18A;WEE1;KIF18B;RAD51C;CDK5;KIF2A;KIF16B;KIFC1;KIF4A;CDK2;KIF2C;KIF20A;KIF20B;TUBA8	Reactome_Pathways_2024
Module 5	Regulation of DNA Metabolic Process (GO:0051052)	25/116	3.08277	0.000197215	USP37;PARG;DSCC1;GMNN;NUCKS1;BRCA1;ORC5;CHRAC1;ORC3;USP1;SMARCAD1;FBXO5;KPNA2;BARD1;SLF1;SLF2;XRCC5;ACTL6A;ESCO2;UCHL5;CCNA2;NSMCE4A;POLE3;TAF5;OBI1	GO_Biological_Process_2025
Module 5	Regulation of Centriole Replication (GO:0046599)	9/19	10.0452	0.000203813	PLK4;STIL;CEP295;NUP62;SPICE1;SASS6;BRCA1;CEP76;CDK5RAP2	GO_Biological_Process_2025
Module 5	Regulation of Nuclear Division (GO:0051783)	9/19	10.0452	0.000203813	CDCA2;RCC1;NEK2;FBXO5;CDC25C;FBXO43;MKI67;PKMYT1;KIF20B	GO_Biological_Process_2025
Module 5	Positive Regulation of DNA-directed DNA Polymerase Activity (GO:1900264)	6/8	33.4374	0.000203813	RFC5;RFC3;PCNA;RFC4;RFC2;DSCC1	GO_Biological_Process_2025
Module 5	Positive Regulation of Ubiquitin Protein Ligase Activity (GO:1904668)	6/8	33.4374	0.000203813	CDC20;FZR1;UBE2C;UBE2S;PLK1;ZNF367	GO_Biological_Process_2025
Module 5	U4/U6 X U5 tri-snRNP Complex (GO:0046540)	12/35	5.8298	0.000204673	PRPF4;SNRNP40;SART3;LSM6;PRPF3;PPIH;SNRPE;USP39;LSM5;LSM3;LSM2;SNRPB	GO_Cellular_Component_2025
Module 5	Spliceosomal tri-snRNP Complex (GO:0097526)	12/35	5.8298	0.000204673	PRPF4;SNRNP40;SART3;LSM6;PRPF3;PPIH;SNRPE;USP39;LSM5;LSM3;LSM2;SNRPB	GO_Cellular_Component_2025
Module 5	Base-Excision Repair (GO:0006284)	13/39	5.58938	0.000221769	FEN1;PARG;XRCC4;XRCC1;UNG;NEIL3;NTHL1;POLD1;RPA3;ERCC5;DNA2;POLE;MUTYH	GO_Biological_Process_2025
Module 5	E3 Ubiquitin Ligases Ubiquitinate Target Proteins	15/57	3.9938	0.000225411	H2BC9;PCNA;H2BC5;UBE2D2;H2BC3;H2BC4;UBE2J2;H2BC17;H2BC13;H2BC14;H2BC15;H2BC11;HLTF;LEO1;RAD18	Reactome_Pathways_2024
Module 5	TP53 Regulates Transcription of Genes Involved in G2 Cell Cycle Arrest	8/18	8.9236	0.000233237	CCNB1;PCNA;RBL1;TFDP1;CDK1;E2F4;CDC25C;AURKA	Reactome_Pathways_2024
Module 5	Mismatch Repair (GO:0006298)	10/24	7.97547	0.000252418	MSH6;POLD3;PCNA;RNASEH2A;MSH2;MCM8;EXO1;RPA3;MLH1;MUTYH	GO_Biological_Process_2025
Module 5	HIV Infection	37/227	2.18949	0.00026802	NUP205;FEN1;NUP107;SEH1L;GTF2E1;NUP160;XPO1;NUP85;NUP42;POLR2B;NUP62;RCC1;NUP88;NUP43;POLR2H;POLR2I;RAE1;POLR2K;NDC1;RANBP1;TBP;XRCC4;LIG1;NUP155;XRCC5;SSRP1;NUP93;ERCC3;NUP50;TAF4B;NUP35;NUP54;NUP98;TAF5;TAF3;NUP58;NUP37	Reactome_Pathways_2024
Module 5	Influenza Infection	30/169	2.42293	0.000270677	NUP205;NUP107;SEH1L;NUP160;XPO1;PABPN1;NUP85;NUP42;POLR2B;NUP62;NUP88;NUP43;POLR2H;KPNA2;POLR2I;RPS10;RAE1;POLR2K;RPL39L;NDC1;CPSF4;NUP155;PARP1;NUP93;NUP50;NUP35;NUP54;NUP98;NUP58;NUP37	Reactome_Pathways_2024
Module 5	Positive Regulation of Cytokinesis (GO:0032467)	13/40	5.38208	0.000299065	KIF14;CDCA8;KIF23;CDC6;CDC25B;RACGAP1;INCENP;CSPP1;BIRC5;PKN2;ECT2;KIF20B;ZNF367	GO_Biological_Process_2025
Module 5	G1/S Transition of Mitotic Cell Cycle (GO:0000082)	17/64	4.04863	0.00030007	USP37;CCNF;CUL2;CDC7;CDC25A;CCNA2;CCNB2;CCNB1;DBF4;CCNE2;RPS6KB1;CDK2;CDK1;RCC1;PIM2;POLE;CDKN3	GO_Biological_Process_2025
Module 5	3'-5' DNA Helicase Activity (GO:0043138)	8/14	14.8759	0.00031261	RECQL4;BLM;FANCM;MCM7;ERCC3;MCM5;NAV2;MCM6	GO_Molecular_Function_2025
Module 5	Exonuclease Activity (GO:0004527)	15/48	5.08552	0.00031261	DCLRE1B;TRIR;FEN1;MRE11;REXO5;ISG20;EXOSC10;CNOT7;ERI1;EXO1;EXOSC9;EXOSC8;EXOSC3;EXOSC2;RAD9A	GO_Molecular_Function_2025
Module 5	RNA Exonuclease Activity, Producing 5'-Phosphomonoesters (GO:0016896)	12/32	6.70537	0.00031261	TOE1;ISG20;EXOSC10;PNPT1;CNOT7;ERI1;ERI2;EXOSC9;CPSF3;EXOSC3;EXOSC2;DCP2	GO_Molecular_Function_2025
Module 5	Cytoskeleton-Dependent Cytokinesis (GO:0061640)	20/84	3.50107	0.000313952	PLK1;CKAP2;CDCA8;KIF23;SEPTIN3;SEPTIN4;CENPA;AURKB;ANLN;ESPL1;RACGAP1;VPS72;INCENP;KIF4A;STMN1;BIRC5;KIF20A;STAMBP;ECT2;CEP55	GO_Biological_Process_2025
Module 5	PKMTs Methylate Histone Lysines	13/46	4.40207	0.000318532	SUZ12;SUV39H2;EED;SUV39H1;ASH2L;RBBP4;RBBP5;NSD2;WDR5;H4C1;KMT5A;RBBP7;EZH2	Reactome_Pathways_2024
Module 5	Regulation of Spindle Organization (GO:0090224)	9/20	9.13147	0.000324107	GPSM2;TPX2;STIL;BORA;PSRC1;NUP62;SASS6;TACC3;RNF4	GO_Biological_Process_2025
Module 5	Regulation of Mitotic Sister Chromatid Separation (GO:0010965)	7/12	15.6111	0.000358376	CCNB1;INCENP;BIRC5;CDCA8;KNL1;AURKB;CDK5RAP2	GO_Biological_Process_2025
Module 5	Regulation of Mitotic Spindle Organization (GO:0060236)	13/41	5.18958	0.00038974	GPSM2;STIL;BORA;PLK1;CCSAP;TPX2;PSRC1;CHMP1B;NUP62;SASS6;TACC3;RCC1;CEP97	GO_Biological_Process_2025
Module 5	Cellular Response to Ionizing Radiation (GO:0071479)	15/53	4.41517	0.000409056	BARD1;BLM;KDM4D;XRCC5;NUCKS1;BRCA1;BRCA2;RAD51AP1;RAD51;FIGNL1;INTS7;ECT2;RAD9B;RHNO1;RAD9A	GO_Biological_Process_2025
Module 5	Nuclear Membrane (GO:0031965)	39/239	2.19396	0.000456556	DYNC2I2;NUP205;GTF3C3;NUP107;NRM;YEATS4;ENO1;CASC3;TENT4A;LMNB2;CEP128;LMNB1;GLE1;TCHP;BRIP1;TMEM168;FZR1;XPO1;CREB3L4;NUP42;NUP62;KPNA2;LBR;ARL6IP6;TMPO;NDC1;NUP155;PDE4D;SENP1;NUP93;ZC3HC1;THAP7;NUP50;ALOX5AP;BCL2;NUP35;NUP98;TMEM18;TAF3	GO_Cellular_Component_2025
Module 5	Establishment of Mitotic Spindle Localization (GO:0040001)	12/36	5.58659	0.000456878	GPSM2;HDAC3;KAT5;ESPL1;SAPCD2;NDE1;PLK1;SPDL1;CENPA;NDC80;CDK5RAP2;MAD2L1	GO_Biological_Process_2025
Module 5	Negative Regulation of Cell Cycle Process (GO:0010948)	12/36	5.58659	0.000456878	ESPL1;POC5;CHEK1;NEK2;FBXO5;FBXO43;SKA3;BAZ1B;AURKB;SKA1;E2F7;E2F8	GO_Biological_Process_2025
Module 5	Establishment of Mitotic Spindle Orientation (GO:0000132)	11/31	6.14284	0.000514021	GPSM2;HDAC3;KAT5;SAPCD2;NDE1;PLK1;SPDL1;CENPA;NDC80;CDK5RAP2;MAD2L1	GO_Biological_Process_2025
Module 5	rRNA 3'-End Processing (GO:0031125)	6/9	22.2904	0.000514021	EXOSC10;EXOSC9;EXOSC8;EXOSC3;EXOSC2;REXO5	GO_Biological_Process_2025
Module 5	Exonucleolytic Trimming to Gen Mat 3'-End of 5.8S rRNA Frm Tricistronic rRNA Trnscpt (GO:0000467)	5/6	55.6982	0.000514021	EXOSC10;EXOSC9;EXOSC8;EXOSC3;EXOSC2	GO_Biological_Process_2025
Module 5	Homologous Recombination WP186	7/13	13.0085	0.000531208	POLD3;MRE11;RAD51;POLD1;RPA1;BRCA2;RAD54B	WikiPathways_2024_Human
Module 5	Protein Depolymerization (GO:0051261)	10/26	6.97777	0.000531844	KIF18A;KIF18B;KIF2A;VPS72;STMN1;KIF14;STMN3;KIF24;KIF2C;CKAP5	GO_Biological_Process_2025
Module 5	Aberrant Regulation of Mitotic Cell Cycle Due to RB1 Defects	11/36	4.91293	0.000534527	RB1;FZR1;CDC23;TFDP1;CCNE2;UBE2C;UBE2S;CDK2;E2F1;E2F2;ANAPC4	Reactome_Pathways_2024
Module 5	Nucleosomal DNA Binding (GO:0031492)	12/34	6.09512	0.000590576	H2AZ1;H1-5;H1-4;HDAC2;H3-5;RBBP4;RCC1;VRK1;H1-10;H1-3;H3-3B;H1-2	GO_Molecular_Function_2025
Module 5	Spliceosomal snRNP Assembly (GO:0000387)	12/37	5.36283	0.000603405	COIL;SART3;PRPF3;GEMIN4;GEMIN6;SNRPE;SRFBP1;LIN9;PRPF19;SRSF10;LSM2;SNRPB	GO_Biological_Process_2025
Module 5	Interferon Signaling	42/280	1.98502	0.000607491	NUP205;NUP107;SEH1L;EIF4A3;FAAP24;NUP160;TUBA1C;TRIM6;NUP85;NUP42;NUP62;NUP88;NUP43;JAK2;KPNA2;RAE1;HLA-DPA1;NDC1;UBE2I;FANCM;NUP155;FANCL;FANCA;FANCC;FANCB;HSPA2;TUBB4B;FANCE;ILF2;FANCG;NUP93;ISG20;NUP50;OAS3;HLA-DPB1;CDK1;NUP35;NUP54;NUP98;NUP58;TUBA8;NUP37	Reactome_Pathways_2024
Module 5	Regulation of Ubiquitin Protein Ligase Activity (GO:1904666)	8/17	9.91565	0.000618479	CDC20;FZR1;UBE2C;UBE2S;PLK1;FBXO5;ZNF367;MAD2L1	GO_Biological_Process_2025
Module 5	RNA 3'-End Processing (GO:0031123)	14/49	4.47204	0.000649046	TOE1;CPSF7;CPSF6;PNPT1;CPSF3;CSTF2;TENT4A;REXO5;NUDT21;ERI1;LEO1;RPRD1B;INTS7;INTS9	GO_Biological_Process_2025
Module 5	Condensed Chromosome, Centromeric Region (GO:0000779)	6/10	16.7169	0.000689316	SGO1;SYCP2;NCAPD2;NCAPD3;CENPA;CENPC	GO_Cellular_Component_2025
Module 5	mRNA 3'-End Processing (GO:0031124)	10/27	6.56696	0.000760584	SLBP;ZNF473;NUDT21;CPSF7;CPSF6;PCF11;CPSF3;CSTF2;LEO1;RPRD1B	GO_Biological_Process_2025
Module 5	APC-Cdc20 Mediated Degradation of Nek2A	9/26	5.90666	0.00077835	CDC20;CDC23;UBE2C;UBE2S;BUB1B;ANAPC4;NEK2;BUB3;MAD2L1	Reactome_Pathways_2024
Module 5	Inactivation of APC C via Direct Inhibition of the APC C Complex	8/21	6.86319	0.000839879	CDC20;CDC23;UBE2C;UBE2S;BUB1B;ANAPC4;BUB3;MAD2L1	Reactome_Pathways_2024
Module 5	Inhib of Proteolytic Activity of APC C Required for Onset of Anaphase by Mitotic Spindle Checkpoint	8/21	6.86319	0.000839879	CDC20;CDC23;UBE2C;UBE2S;BUB1B;ANAPC4;BUB3;MAD2L1	Reactome_Pathways_2024
Module 5	POLB-Dependent Long Patch Base Excision Repair	5/8	18.5641	0.000889393	FEN1;PARG;LIG1;PARP1;PARP2	Reactome_Pathways_2024
Module 5	Diseases of Mitotic Cell Cycle	11/38	4.54851	0.000897193	RB1;FZR1;CDC23;TFDP1;CCNE2;UBE2C;UBE2S;CDK2;E2F1;E2F2;ANAPC4	Reactome_Pathways_2024
Module 5	Progesterone-mediated oocyte maturation	21/100	2.97751	0.000934729	PLK1;KIF22;CDC25C;PKMYT1;CDC25A;CDC25B;AURKA;MAPK13;CCNA2;CCNB2;MAPK9;CCNB1;CPEB1;FZR1;CDC23;RPS6KA1;CDK2;CDK1;ANAPC4;BUB1;MAD2L1	KEGG_2021_Human
Module 5	3'-5' Exonuclease Activity (GO:0008408)	14/47	4.74359	0.000935151	TRIR;TOE1;MRE11;PNPT1;ISG20;EXOSC10;CNOT7;ERI1;ERI2;EXOSC9;POLD1;EXOSC3;EXOSC2;RAD9A	GO_Molecular_Function_2025
Module 5	Negative Regulation of G2/M Transition of Mitotic Cell Cycle (GO:0010972)	11/33	5.58379	0.000955527	BARD1;WEE1;MRE11;ARTN;PINX1;CHEK1;RBBP8;BRCA1;PKMYT1;AURKB;INIP	GO_Biological_Process_2025
Module 5	Regulation of Microtubule Nucleation (GO:0010968)	8/18	8.9236	0.00100433	HAUS8;HAUS3;HAUS6;HAUS5;CKAP5;HAUS2;GIT1;HAUS1	GO_Biological_Process_2025
Module 5	Primary Ovarian Insufficiency WP5316	30/170	2.4055	0.0010376	PCSK1;BLM;NUP107;MCM8;WDR62;BRCA1;BRCA2;RCBTB1;AFF2;RECQL4;EXO1;MGME1;FANCM;XRCC4;PARP1;FANCL;NANOS3;XRCC2;CBX2;TWNK;FANCA;FANCC;PRLR;ACVR2B;FANCG;DIAPH2;CPEB1;RAD51;STAG3;DMC1	WikiPathways_2024_Human
Module 5	Positive Regulation of Transferase Activity (GO:0051347)	12/39	4.96504	0.00104602	RFC5;CD74;GSK3A;RFC3;PCNA;RFC4;UBE2I;PABPN1;RFC2;DSCC1;PLK1;CHTF18	GO_Biological_Process_2025
Module 5	Influenza Viral RNA Transcription and Replication	26/149	2.36927	0.00106992	NUP205;NUP107;SEH1L;NUP160;NUP85;NUP42;POLR2B;NUP62;NUP88;NUP43;POLR2H;POLR2I;RPS10;RAE1;POLR2K;RPL39L;NDC1;NUP155;PARP1;NUP93;NUP50;NUP35;NUP54;NUP98;NUP58;NUP37	Reactome_Pathways_2024
Module 5	Positive Regulation of DNA Replication (GO:0045740)	9/23	7.17355	0.00108659	CDT1;WEE1;PCNA;ATAD5;FAF1;CDK2;DNA2;CDC25A;EREG	GO_Biological_Process_2025
Module 5	Kinetochore Assembly (GO:0051382)	6/10	16.7169	0.00108659	CENPF;CENPW;MIS12;KNTC1;DLGAP5;CENPC	GO_Biological_Process_2025
Module 5	Nuclear Pore Complex Assembly (GO:0051292)	6/10	16.7169	0.00108659	NDC1;NUP93;NUP205;NUP107;NUP98;TMEM170A	GO_Biological_Process_2025
Module 5	Positive Regulation of Centriole Replication (GO:0046601)	6/10	16.7169	0.00108659	PLK4;STIL;CEP295;NUP62;SASS6;POC1B	GO_Biological_Process_2025
Module 5	Regulation of Mitotic Sister Chromatid Segregation (GO:0033047)	6/10	16.7169	0.00108659	CCNB1;KAT5;CDK1;KNL1;AURKB;CDK5RAP2	GO_Biological_Process_2025
Module 5	Cellular senescence	28/156	2.4542	0.00115292	RB1;LIN54;MRE11;TRAF3IP2;CALML4;LIN9;FOXM1;PPP1CC;CCNB2;CCNB1;RBBP4;CHEK2;CHEK1;E2F1;E2F2;MYBL2;E2F4;LIN52;NFATC3;CDC25A;MAPK13;CCNA2;RBL1;CCNE2;CDK2;CDK1;RAD9B;RAD9A	KEGG_2021_Human
Module 5	Telomere Maintenance (GO:0000723)	17/72	3.45823	0.00131919	DCLRE1B;BLM;MRE11;PARP1;XRCC5;PTGES3;ACTL6A;XRCC3;UCHL5;RECQL4;RAD51;ARTN;SHLD3;RPA3;SHLD2;CDK2;DNA2	GO_Biological_Process_2025
Module 5	DNA Exonuclease Activity, Producing 5'-Phosphomonoesters (GO:0016895)	7/13	13.0085	0.00149512	DCLRE1B;DCLRE1A;MGME1;FEN1;MRE11;EXO1;POLD1	GO_Molecular_Function_2025
Module 5	DNA Geometric Change (GO:0032392)	5/7	27.8476	0.00150286	HMGB2;HMGB3;MTERF1;DNA2;HMGB1	GO_Biological_Process_2025
Module 5	DNA Strand Resection Involved in Replication Fork Processing (GO:0110025)	5/7	27.8476	0.00150286	BARD1;MRE11;EXO1;RBBP8;BRCA1	GO_Biological_Process_2025
Module 5	Nuclear Envelope Organization (GO:0006998)	8/19	8.11192	0.00150606	NUP93;DES;NUP155;REEP4;NEMP1;TMEM170A;LMNB2;LMNB1	GO_Biological_Process_2025
Module 5	Nucleotide-Excision Repair (GO:0006289)	14/53	4.01249	0.00153817	RAD23A;FANCC;BRCA2;POLD3;POLA1;BRIP1;KAT5;ERCC3;NTHL1;POLD1;RPA3;ERCC5;POLR2I;POLE	GO_Biological_Process_2025
Module 5	Cellular Response to Radiation (GO:0071478)	13/47	4.27237	0.00163954	BARD1;BLM;KDM4D;BRCA1;BRCA2;RAD51AP1;RAD51;FIGNL1;INTS7;ECT2;RAD9B;RAD9A;RHNO1	GO_Biological_Process_2025
Module 5	Apoptosis Induced DNA Fragmentation	6/13	9.55095	0.00164359	H1-5;H1-4;HMGB2;HMGB1;H1-3;H1-2	Reactome_Pathways_2024
Module 5	Chk1 Chk2(Cds1) Mediated Inactivation of Cyclin B Cdk1 Complex	6/13	9.55095	0.00164359	CCNB1;WEE1;CHEK2;CHEK1;CDK1;CDC25C	Reactome_Pathways_2024
Module 5	Positive Regulation of DNA Biosynthetic Process (GO:2000573)	12/41	4.62212	0.00167242	RFC5;RFC3;PCNA;RFC4;RFC2;DSCC1;PTGES3;USP1;NAF1;CHTF18;CCT5;WRAP53	GO_Biological_Process_2025
Module 5	Cyclin A Cdk2-associated Events at S Phase Entry	16/75	3.03162	0.00174325	RB1;LIN54;LIN9;CDC25A;CKS1B;CDC25B;CCNA2;FZR1;WEE1;TFDP1;CCNE2;RBBP4;CDK2;E2F1;E2F4;LIN52	Reactome_Pathways_2024
Module 5	Human T-cell leukemia virus 1 infection	35/219	2.13674	0.00177146	RB1;CD40;CRTC2;BUB1B;TNFRSF13C;ETS2;CDC20;CCNB2;MAPK9;CDC23;XPO1;KAT5;PTTG1;CREB3L4;CHEK2;CHEK1;E2F1;E2F2;BUB3;JAK3;HLA-DOB;HLA-DPA1;MAP3K3;RANBP1;MAP2K4;CDKN2C;TBP;NFATC3;CCNA2;CCNE2;ESPL1;CDK2;HLA-DPB1;ANAPC4;MAD2L1	KEGG_2021_Human
Module 5	RNA Export From Nucleus (GO:0006405)	16/67	3.5087	0.0017819	NUP107;NUP155;EIF4A3;THOC3;CASC3;NXT2;MAGOHB;NUP160;GLE1;XPO1;DDX39A;NUP85;SARNP;NUP62;NUP88;NUP98	GO_Biological_Process_2025
Module 5	Regulation of APC C Activators Between G1 S and Early Anaphase	15/68	3.163	0.00179936	UBE2C;PLK1;BUB1B;CDC20;CCNA2;CCNB1;FZR1;CDC23;UBE2S;CDK2;CDK1;ANAPC4;FBXO5;BUB3;MAD2L1	Reactome_Pathways_2024
Module 5	Pyrimidine metabolism	14/56	3.72527	0.00194429	DTYMK;DUT;RRM1;RRM2;CTPS2;TYMS;DCK;NT5C3A;UCK1;DPYD;CMPK2;NT5M;TK1;UPP1	KEGG_2021_Human
Module 5	mRNA Export From Nucleus (GO:0006406)	15/61	3.64572	0.00204723	NUP107;EIF4A3;THOC3;CASC3;NXT2;MAGOHB;NUP160;GLE1;NUP93;XPO1;DDX39A;PABPN1;NUP85;SARNP;NUP88	GO_Biological_Process_2025
Module 5	Positive Regulation of DNA-templated DNA Replication (GO:2000105)	6/11	13.3728	0.00206023	CDT1;DBF4;CDC7;DBF4B;E2F7;E2F8	GO_Biological_Process_2025
Module 5	Positive Regulation of Metaphase/Anaphase Transition of Cell Cycle (GO:1902101)	6/11	13.3728	0.00206023	CDC20;RB1;CDC23;ESPL1;UBE2C;DLGAP5	GO_Biological_Process_2025
Module 5	Regulation of Cell Cycle Checkpoint (GO:1901976)	6/11	13.3728	0.00206023	BARD1;RAD51;RFWD3;BRCA1;BRCA2;WDR76	GO_Biological_Process_2025
Module 5	SLC Transporter Disorders	19/99	2.65686	0.00212652	NDC1;NUP205;NUP107;SEH1L;NUP155;NUP160;NUP93;NUP85;NUP42;NUP50;NUP62;NUP35;NUP88;NUP54;NUP43;NUP98;RAE1;NUP58;NUP37	Reactome_Pathways_2024
Module 5	Ub-specific Processing Proteases	30/190	2.1025	0.00217377	USP13;USP37;CCP110;H2AC18;CDC20;H2AC11;H2AC12;H2AC14;H2BC26;H2BC21;CLSPN;RCE1;H2BC9;H2BC5;H2AC4;USP3;H2BC3;H2BC4;TRAF2;H2BC17;CDC25A;H2BC18;CCNA2;H2BC13;H2BC14;H2AC25;H2BC15;H2AC20;H2AC21;H2BC11	Reactome_Pathways_2024
Module 5	Pericentric Heterochromatin (GO:0005721)	8/21	6.86319	0.00217765	HELLS;CHRAC1;INCENP;CBX1;POLE3;NCAPD3;BAZ1B;CENPC	GO_Cellular_Component_2025
Module 5	Signaling by NOTCH	32/209	2.02787	0.00247948	HDAC2;HDAC3;NOTCH4;ATP2A1;RBPJ;H2AC18;APH1A;NEURL1B;H2AC14;H2BC26;H2BC21;E2F1;HES1;H4C1;DLGAP5;HES5;H2BC9;TLE3;H2BC5;H2BC3;H2AC4;H2BC4;H2BC17;H2BC13;H2BC14;H2BC15;TFDP1;H2AC20;H2BC11;TACC3;CNTN1;MAMLD1	Reactome_Pathways_2024
Module 5	RUNX1 Regulates Transcription of Genes Involved in Differentiation of HSCs	17/85	2.79511	0.00252331	H2BC9;H2BC5;H2AC4;H2BC3;LMO2;H2BC4;H2BC17;H2AC18;H2BC13;H2BC14;H2AC14;H2BC26;H2BC15;H2BC21;H2AC20;H2BC11;H4C1	Reactome_Pathways_2024
Module 5	RNA Exonuclease Activity (GO:0004532)	7/14	11.1495	0.00257823	CNOT7;EXOSC10;EXOSC9;EXOSC8;EXOSC3;EXOSC2;DCP2	GO_Molecular_Function_2025
Module 5	TP53 Regulates Transcription of Genes Involved in G1 Cell Cycle Arrest	6/14	8.35662	0.002608	CCNA2;CCNE2;CDK2;E2F1;E2F7;E2F8	Reactome_Pathways_2024
Module 5	Initiation of Nuclear Envelope (NE) Reformation	7/19	6.50213	0.00263755	CCNB2;CCNB1;CDK1;VRK1;LBR;LMNB1;TMPO	Reactome_Pathways_2024
Module 5	Activation of APC C and APC C Cdc20 Mediated Degradation of Mitotic Proteins	14/64	3.12786	0.00298404	UBE2C;PLK1;BUB1B;CDC20;CCNA2;CCNB1;CDC23;PTTG1;UBE2S;CDK1;ANAPC4;NEK2;BUB3;MAD2L1	Reactome_Pathways_2024
Module 5	Host Interactions of HIV Factors	22/126	2.36767	0.00301361	NDC1;RANBP1;NUP205;NUP107;SEH1L;NUP155;NUP160;NUP93;XPO1;NUP85;NUP42;NUP50;NUP62;RCC1;NUP35;NUP88;NUP54;NUP43;NUP98;RAE1;NUP58;NUP37	Reactome_Pathways_2024
Module 5	Microtubule Polymerization or Depolymerization (GO:0031109)	9/26	5.90666	0.0030349	KIF18A;KIF18B;KIF2A;STMN1;KIF14;STMN3;KIF24;KIF2C;HDGFL3	GO_Biological_Process_2025
Module 5	Regulation of DNA Damage Checkpoint (GO:2000001)	7/16	8.67092	0.00306055	BARD1;RAD51;RFWD3;BRCA1;BRCA2;WDR76;TTI1	GO_Biological_Process_2025
Module 5	Bubble DNA Binding (GO:0000405)	5/7	27.8476	0.00317186	RECQL4;BLM;NEIL3;ERCC5;HMGB1	GO_Molecular_Function_2025
Module 5	DNA Damage Response, Signal Transduction by P53 Class Mediator (GO:0030330)	10/32	5.07308	0.00342058	RBM38;PIDD1;PAXIP1;TFAP4;KAT5;CRADD;ARTN;FOXM1;GTSE1;E2F7	GO_Biological_Process_2025
Module 5	Negative Regulation of DNA-templated DNA Replication (GO:2000104)	5/8	18.5641	0.00342441	CDT1;TIPIN;GMNN;TIMELESS;FBXO5	GO_Biological_Process_2025
Module 5	Regulation of Sister Chromatid Cohesion (GO:0007063)	5/8	18.5641	0.00342441	FEN1;ESPL1;RAD21;CTCF;BUB1	GO_Biological_Process_2025
Module 5	Phosphorylation of the APC C	7/20	6.00164	0.00372989	CCNB1;CDC23;UBE2C;UBE2S;PLK1;CDK1;ANAPC4	Reactome_Pathways_2024
Module 5	Regulation of Mitotic Metaphase/Anaphase Transition (GO:0030071)	13/51	3.82181	0.00377829	RB1;SMARCD1;UBE2C;PLK1;KNL1;CDC6;CDC20;CCNB1;CDC23;ESPL1;FBXO5;DLGAP5;CDK5RAP2	GO_Biological_Process_2025
Module 5	mRNA Metabolic Process (GO:0016071)	20/101	2.76371	0.00383119	SF3A3;TCERG1;CPSF6;PNPT1;SF3A2;METTL3;U2AF1;LSM5;USP39;LSM3;EREG;LSM2;NUDT21;LSM6;PRPF3;EXOSC9;METTL16;EXOSC3;CBLL1;DCP2	GO_Biological_Process_2025
Module 5	RNA Catabolic Process (GO:0006401)	17/79	3.06661	0.00397771	TRIR;DBR1;FEN1;RNASEH2A;PNPT1;LSM5;LSM2;ISG20;EXOSC10;LSM6;EXOSC9;EXOSC8;DNA2;METTL16;EXOSC3;EXOSC2;DCP2	GO_Biological_Process_2025
Module 5	Regulation of Double-Strand Break Repair via Nonhomologous End Joining (GO:2001032)	9/27	5.57821	0.0040253	SMCHD1;MRE11;KDM4D;SHLD3;SHLD2;USP51;AUNIP;CYREN;WRAP53	GO_Biological_Process_2025
Module 5	Positive Regulation of Mitotic Sister Chromatid Segregation (GO:0062033)	4/5	44.5316	0.00416411	KAT5;CDK1;SKA3;SKA1	GO_Biological_Process_2025
Module 5	Apoptotic Execution Phase	12/52	3.34902	0.00430533	H1-5;H1-4;STK24;CASP6;STK26;HMGB2;HMGB1;CLSPN;DNM1L;H1-3;LMNB1;H1-2	Reactome_Pathways_2024
Module 5	Positive Regulation of G1/S Transition of Mitotic Cell Cycle (GO:1900087)	10/33	4.85225	0.00431455	MTBP;RRM1;STIL;RRM2;TFDP1;CCNE2;CPSF3;RDX;SASS6;CDC6	GO_Biological_Process_2025
Module 5	Protein Localization to Chromatin (GO:0071168)	10/33	4.85225	0.00431455	H1-5;MMS22L;PARP1;MCM8;RAD21;H2AC4;PLK1;H2BC11;TONSL;CENPA	GO_Biological_Process_2025
Module 5	Nucleolar Exosome (RNase Complex) (GO:0101019)	5/9	13.9223	0.0046588	EXOSC10;EXOSC9;EXOSC8;EXOSC3;EXOSC2	GO_Cellular_Component_2025
Module 5	mRNA Transport (GO:0051028)	14/59	3.47635	0.0047214	SLBP;NUP107;EIF4A3;THOC3;CASC3;NXT2;MAGOHB;NUP160;GLE1;XPO1;DDX39A;NUP85;SARNP;NUP88	GO_Biological_Process_2025
Module 5	U2-type Precatalytic Spliceosome (GO:0071005)	12/48	3.72195	0.00503831	SF3A3;PRPF4;SF3A2;LSM6;PHF5A;PRPF3;SNRPE;LSM5;MAGOHB;LSM3;LSM2;SNRPB	GO_Cellular_Component_2025
Module 5	RNA Processing (GO:0006396)	42/291	1.89618	0.00513134	TCERG1;POP7;FASTKD1;NVL;RPP30;NOLC1;U2AF1;TENT4A;USP39;FBL;EXOSC10;PABPN1;EXOSC9;EXOSC8;EXOSC3;METTL16;EXOSC2;SF3A3;SF3A2;CPSF6;METTL3;WDR74;ADAT1;DDX10;DNTTIP2;MAGOHB;LSM5;LSM3;HNRNPL;ISG20;NUDT21;PRPF4;SNRNP40;LSM6;HNRNPF;PRPF3;INTS7;RNPS1;SNRNP48;INTS9;CBLL1;SNRPB	GO_Biological_Process_2025
Module 5	Precatalytic Spliceosome (GO:0071011)	12/49	3.62116	0.00594811	SF3A3;PRPF4;SF3A2;LSM6;PHF5A;PRPF3;SNRPE;LSM5;MAGOHB;LSM3;SNRPB;LSM2	GO_Cellular_Component_2025
Module 5	ISWI-type Complex (GO:0031010)	6/14	8.35662	0.0060585	CHRAC1;HMGXB4;RBBP4;POLE3;RBBP7;BAZ1B	GO_Cellular_Component_2025
Module 5	Cyclin D Associated Events in G1	11/47	3.40971	0.00612454	RB1;CDKN2C;RBL1;TFDP1;CCNE2;CDK2;E2F1;E2F2;E2F4;JAK2;CKS1B	Reactome_Pathways_2024
Module 5	G1 Phase	11/47	3.40971	0.00612454	RB1;CDKN2C;RBL1;TFDP1;CCNE2;CDK2;E2F1;E2F2;E2F4;JAK2;CKS1B	Reactome_Pathways_2024
Module 5	Activation of NIMA Kinases NEK9, NEK6, NEK7	4/7	14.8422	0.0063512	CCNB2;CCNB1;PLK1;CDK1	Reactome_Pathways_2024
Module 5	Deubiquitination	37/268	1.79682	0.00668776	USP13;USP37;CCP110;BRCA1;H2AC18;CDC20;H2AC11;H2AC12;H2AC14;H2BC26;H2BC21;RCE1;CLSPN;BARD1;H2BC9;H2BC5;H2BC3;H2AC4;USP3;ACTL6A;H2BC4;RAD23A;TRAF2;H2BC17;UCHL5;CDC25A;H2BC18;CCNA2;H2BC13;H2BC14;H2AC25;H2BC15;H2AC20;H2AC21;H2BC11;CDK1;STAMBP	Reactome_Pathways_2024
Module 5	Telomere Organization (GO:0032200)	14/61	3.32806	0.00674067	DCLRE1B;BLM;MRE11;PARP1;XRCC5;PTGES3;ACTL6A;UCHL5;RECQL4;ARTN;RPA3;DNA2;H3C7;H3-3B	GO_Biological_Process_2025
Module 5	Regulation of Attachment of Mitotic Spindle Microtubules to Kinetochore (GO:1902423)	5/9	13.9223	0.00674067	KAT5;INCENP;CDK1;BIRC5;CDCA8	GO_Biological_Process_2025
Module 5	Negative Regulation of DNA Metabolic Process (GO:0051053)	11/41	4.09299	0.00675063	H1-5;MSH6;H1-4;BLM;MSH2;XRCC5;GMNN;CDC6;H1-10;H1-3;H1-2	GO_Biological_Process_2025
Module 5	TP53 Regulates Transcription of DNA Repair Genes	13/62	2.96207	0.00680432	FANCI;FANCC;BRCA1;SSRP1;MLH1;MSH2;ERCC3;FANCD2;POLR2B;CHEK1;POLR2H;POLR2I;POLR2K	Reactome_Pathways_2024
Module 5	COPI-dependent Golgi-to-ER Retrograde Traffic	18/101	2.42416	0.00693235	KIF23;KIF11;KIF22;TUBB4B;KIF15;TUBA1C;KIF18A;KIF18B;RACGAP1;KIF2A;KIF16B;KIFC1;KIF4A;KIF21A;KIF2C;KIF20A;KIF20B;TUBA8	Reactome_Pathways_2024
Module 5	Positive Regulation of Mitotic Nuclear Division (GO:0045840)	10/35	4.46358	0.0071048	RB1;CDC20;CDC23;ESPL1;UBE2C;NUP62;PHIP;DLGAP5;AURKA;EREG	GO_Biological_Process_2025
Module 5	5'-3' DNA Helicase Activity (GO:0043139)	5/8	18.5641	0.00738767	PIF1;ZGRF1;TWNK;IGHMBP2;DNA2	GO_Molecular_Function_2025
Module 5	Post-Translational Protein Modification (GO:0043687)	12/48	3.72195	0.00745708	CCNA2;RPS6KA5;PARP1;PARP2;DSCC1;CDK2;FN3KRP;ESCO2;JAK2;BAZ1B;TTL;AURKB	GO_Biological_Process_2025
Module 5	5'-3' Exonuclease Activity (GO:0008409)	6/12	11.1434	0.00755054	DCLRE1B;TRIR;DCLRE1A;FEN1;EXO1;DCP2	GO_Molecular_Function_2025
Module 5	APC C Cdc20 Mediated Degradation of Mitotic Proteins	13/63	2.90267	0.00788157	UBE2C;BUB1B;CDC20;CCNA2;CCNB1;CDC23;PTTG1;UBE2S;CDK1;ANAPC4;NEK2;BUB3;MAD2L1	Reactome_Pathways_2024
Module 5	Aberrant Regulation of Mitotic G1 S Transition in Cancer Due to RB1 Defects	6/17	6.07655	0.00821375	RB1;TFDP1;CCNE2;CDK2;E2F1;E2F2	Reactome_Pathways_2024
Module 5	Defective Binding of RB1 Mutants to E2F1,(E2F2, E2F3)	6/17	6.07655	0.00821375	RB1;TFDP1;CCNE2;CDK2;E2F1;E2F2	Reactome_Pathways_2024
Module 5	Formation of Senescence-Associated Heterochromatin Foci (SAHF)	6/17	6.07655	0.00821375	RB1;H1-5;H1-4;H1-3;H1-2;LMNB1	Reactome_Pathways_2024
Module 5	Deadenylation-dependent mRNA Decay	12/56	3.0439	0.00824421	HBS1L;CNOT7;LSM6;EXOSC9;EIF4A3;EXOSC8;EXOSC3;LSM5;EXOSC2;DCP2;LSM3;LSM2	Reactome_Pathways_2024
Module 5	Chromatin Remodeling (GO:0006338)	38/262	1.90496	0.00859622	RB1;LIN54;SUV39H2;SMARCD1;HDAC2;PAXIP1;MRE11;HDAC3;UHRF1;RNF8;YEATS4;BRCA1;CTCF;NUDT5;CHD1;CHRAC1;SART3;KAT5;RBBP4;ZNF83;VPS72;CHEK1;SMARCAD1;USP51;RBBP7;H3C7;BARD1;PCGF6;KDM4D;PARP2;USP3;VRK1;DEK;BAZ1B;UCHL5;ARTN;MTF2;POLE3	GO_Biological_Process_2025
Module 5	3'-5'-RNA Exonuclease Activity (GO:0000175)	10/33	4.85225	0.00861649	TOE1;ISG20;EXOSC10;PNPT1;CNOT7;ERI1;ERI2;EXOSC9;EXOSC3;EXOSC2	GO_Molecular_Function_2025
Module 5	Mitotic intra-S DNA Damage Checkpoint Signaling (GO:0031573)	6/14	8.35662	0.00939096	TIPIN;MRE11;EME1;FANCD2;RAD9B;RAD9A	GO_Biological_Process_2025
Module 5	Protein Localization to Site of Double-Strand Break (GO:1990166)	6/14	8.35662	0.00939096	H2AX;SLF1;SLF2;XRCC4;TOPBP1;RHNO1	GO_Biological_Process_2025
Module 5	Positive Regulation of DNA Repair (GO:0045739)	18/93	2.68392	0.00939096	H2AX;SMARCD1;SLF1;MRE11;PCNA;SLF2;PARP1;ACTL6A;RNF8;BRCA1;HMGB1;FOXM1;UCHL5;SMCHD1;ARTN;TIMELESS;USP1;WRAP53	GO_Biological_Process_2025
Module 5	Mitotic Sister Chromatid Cohesion (GO:0007064)	7/19	6.50213	0.00939096	RB1;SGO1;CDCA5;DSCC1;RAD21;ESCO2;HASPIN	GO_Biological_Process_2025
Module 5	Negative Regulation of Stem Cell Population Maintenance (GO:1902455)	7/19	6.50213	0.00939096	HDAC2;ING3;RBBP4;SAP130;RBBP7;SINHCAF;SAP30	GO_Biological_Process_2025
Module 5	Pore Complex Assembly (GO:0046931)	7/19	6.50213	0.00939096	NDC1;NUP93;AFDN;NUP205;NUP107;NUP98;TMEM170A	GO_Biological_Process_2025
Module 5	Protein Localization to Microtubule Organizing Center (GO:1905508)	7/19	6.50213	0.00939096	STIL;SPAG5;STK24;CCDC14;CEP83;CEP192;CEP78	GO_Biological_Process_2025
Module 5	PKR-mediated Signaling	15/80	2.57737	0.0097618	UBE2I;FANCM;FANCL;FANCA;FAAP24;FANCC;FANCB;HSPA2;FANCE;TUBB4B;ILF2;FANCG;TUBA1C;CDK1;TUBA8	Reactome_Pathways_2024
Module 5	Formation of Incision Complex in GG-NER	10/43	3.38002	0.0101976	UBE2I;PARP1;ERCC3;PARP2;RPA3;SUMO2;RPA1;RPA2;RAD23A;ERCC5	Reactome_Pathways_2024
Module 5	TRAMP-dependent tRNA Surveillance Pathway (GO:0071038)	4/6	22.2646	0.0104142	EXOSC9;EXOSC8;EXOSC3;EXOSC2	GO_Biological_Process_2025
Module 5	Metaphase/Anaphase Transition of Cell Cycle (GO:0044784)	4/6	22.2646	0.0104142	CDC20;CDC23;PLK1;TACC3	GO_Biological_Process_2025
Module 5	Nuclear Polyadenylation-Dependent rRNA Catabolic Process (GO:0071035)	4/6	22.2646	0.0104142	EXOSC9;EXOSC8;EXOSC3;EXOSC2	GO_Biological_Process_2025
Module 5	Positive Regulation of Spindle Assembly (GO:1905832)	4/6	22.2646	0.0104142	GPSM2;STIL;SPAG5;SASS6	GO_Biological_Process_2025
Module 5	DNA-templated Transcription (GO:0006351)	31/203	2.02092	0.0108045	GTF3C3;GTF3C5;TTF2;TTF1;GTF2E1;CREB3L4;POLR2B;TAF1A;E2F1;MTERF1;POLR2H;POLR2I;POLR2K;SOX5;ZNF141;TBP;PARP1;MTERF4;TWNK;DEK;EREG;PPP5C;TFDP1;PDE10A;ERCC3;TFAM;RNPS1;TRIP13;TAF5;PTMA;RBMX	GO_Biological_Process_2025
Module 5	Cyclin E Associated Events During G1 S Transition	14/73	2.64943	0.0108055	RB1;LIN54;LIN9;CDC25A;CKS1B;CCNA2;WEE1;TFDP1;CCNE2;RBBP4;CDK2;E2F1;E2F4;LIN52	Reactome_Pathways_2024
Module 5	Regulation of Spindle Assembly (GO:0090169)	9/31	4.56299	0.0112414	GPSM2;STIL;SPAG5;CHMP1B;PLK1;SASS6;RCC1;RNF4;CEP97	GO_Biological_Process_2025
Module 5	Co-Transcriptional RNA 3'-End Processing, Cleavage and Polyadenylation Pathway (GO:0180012)	5/10	11.1372	0.0112512	NUDT21;CPSF7;CPSF6;PCF11;CPSF3	GO_Biological_Process_2025
Module 5	Positive Regulation of Attachment of Spindle Microtubules to Kinetochore (GO:0051987)	5/10	11.1372	0.0112512	CCNB1;KAT5;INCENP;BIRC5;CDCA8	GO_Biological_Process_2025
Module 5	Protein Localization to Nuclear Envelope (GO:0090435)	5/10	11.1372	0.0112512	NUP155;PLK1;NUP54;LMNB2;LMNB1	GO_Biological_Process_2025
Module 5	Somatic Recombination of Immunoglobulin Genes Involved in Immune Response (GO:0002204)	5/10	11.1372	0.0112512	MSH6;SANBR;MSH2;RNF8;EXOSC3	GO_Biological_Process_2025
Module 5	Positive Regulation of Cell Cycle G1/S Phase Transition (GO:1902808)	11/44	3.72029	0.0116667	PAGR1;RRM1;STIL;RRM2;TFDP1;CCNE2;CPSF3;RDX;SASS6;FAM83D;EZH2	GO_Biological_Process_2025
Module 5	U6 snRNA Binding (GO:0017070)	6/13	9.55095	0.0116696	PRPF4;SART3;METTL16;LSM3;LSM2;RBM22	GO_Molecular_Function_2025
Module 5	APC C Cdc20 Mediated Degradation of Cyclin B	7/24	4.58849	0.0117542	CDC20;CCNB1;CDC23;UBE2C;UBE2S;CDK1;ANAPC4	Reactome_Pathways_2024
Module 5	Anaphase-Promoting Complex (GO:0005680)	7/21	5.57264	0.011829	CDC20;FZR1;CDC23;UBE2C;UBE2S;BUB1B;ANAPC4	GO_Cellular_Component_2025
Module 5	Protein Import Into Nucleus (GO:0006606)	16/80	2.79401	0.0121242	IPO11;NUP107;NUP155;CSE1L;NUP93;IPO9;STK24;NUP85;NUP50;NUP62;FAM53C;NUP35;NUP54;NUP88;NUP98;KPNA2	GO_Biological_Process_2025
Module 5	Regulation of Mitotic Cell Cycle Phase Transition (GO:1901990)	17/88	2.67656	0.0126634	KLF11;SMARCD1;CDKN2C;UBE2C;PLK1;KIF14;CDC6;AURKA;ANLN;CENPF;CDC23;TFAP4;ERCC3;CDK2;E2F1;KNTC1;ZNF367	GO_Biological_Process_2025
Module 5	Cytosolic Iron-Sulfur Cluster Assembly	5/13	6.95962	0.0127509	BRIP1;NDOR1;POLD1;NUBP1;NUBP2	Reactome_Pathways_2024
Module 5	Mitotic Telophase Cytokinesis	5/13	6.95962	0.0127509	STAG1;RAD21;PLK1;KIF23;KIF20A	Reactome_Pathways_2024
Module 5	Telomere C-strand Synthesis Initiation	5/13	6.95962	0.0127509	PRIM2;POLA1;ACD;POLA2;PRIM1	Reactome_Pathways_2024
Module 5	Protein K6-linked Ubiquitination (GO:0085020)	6/15	7.4277	0.0133019	UBE2S;UBE2T;RNF8;BRCA1;RNF4;UBE2J2	GO_Biological_Process_2025
Module 5	Regulation of Exit From Mitosis (GO:0007096)	6/15	7.4277	0.0133019	CDC23;UBE2C;CDCA5;BIRC5;KNTC1;ZNF367	GO_Biological_Process_2025
Module 5	Mitotic Cell Cycle Checkpoint Signaling (GO:0007093)	8/26	4.95539	0.0139008	BARD1;MRE11;ARTN;CHEK1;RBBP8;BRCA1;AURKB;INIP	GO_Biological_Process_2025
Module 5	Genes Related To Primary Cilium Development Based On CRISPR WP4536	19/104	2.49989	0.0140297	DYNC2I2;TEDC1;TEDC2;ARL6;CEP295;FBF1;SCLT1;TUBD1;ARL13B;TCTN2;TMEM107;SASS6;CEP83;CEP192;CEP97;CEP76;IFT56;CEP43;CEP44	WikiPathways_2024_Human
Module 5	U6 snRNP (GO:0005688)	4/7	14.8422	0.0141682	LSM6;LSM5;LSM3;LSM2	GO_Cellular_Component_2025
Module 5	Cytoskeleton (GO:0005856)	80/694	1.46986	0.0150404	EDA;ONECUT2;MAST2;ACTG2;PQBP1;TUBA1C;RASSF1;NUDCD2;VPS72;KNTC1;TOPBP1;GTSE1;CDK5RAP2;NDC1;SAP30BP;GAS2L3;NCOA5;CKAP2L;TMOD4;CEP295;DENND2A;LRRIQ1;CKAP2;HAUS3;CKAP5;PSRC1;INCENP;BIRC5;KIF2C;RELL1;ARL6;SPESP1;ZBTB49;KLHL17;CDCA8;NCAPG;HMMR;NTN1;SKA1;AURKB;AURKA;NEURL1B;CCNB2;FZR1;NDOR1;ARL13B;NUP85;PPP2R3C;TAF1A;FAM83D;TRMT10A;NHERF1;AUTS2;ODF2;CCDC14;PLK1;ANKRD23;SCLT1;KLHL2;SEPTIN3;SEPTIN4;TUBB4B…	GO_Cellular_Component_2025
Module 5	Regulation of DNA Repair (GO:0006282)	22/130	2.27948	0.0153019	BARD1;H2AX;SMARCD1;PARG;PCNA;PARP1;ACTL6A;RNF8;YEATS4;BRCA1;DEK;UCHL5;SMCHD1;MRGBP;ING3;KAT5;VPS72;USP1;BRD8;TAF5;ATRIP;WRAP53	GO_Biological_Process_2025
Module 5	TCF Dependent Signaling in Response to WNT	27/189	1.86523	0.0163918	ASH2L;H2AC18;FRAT2;H2AC14;H2BC26;XPO1;KAT5;PPP2R5E;RBBP5;H2BC21;LEO1;H4C1;H2BC9;TLE3;H2BC5;H2AC4;H2BC3;H2BC4;PPP2R5D;H2BC17;PYGO2;H2BC13;SFRP1;H2BC14;H2BC15;H2AC20;H2BC11	Reactome_Pathways_2024
Module 5	Transcription by RNA Polymerase II (GO:0006366)	30/200	1.97773	0.0165048	TTF2;GTF2E1;SNAPC1;PCF11;POLR2B;HLTF;TAF1A;LEO1;E2F2;RPRD1B;POLR2H;POLR2I;PAAF1;POLR2K;SOX5;ZNF141;TBP;PARP1;ELP4;DEK;MED7;TFDP1;ERCC3;TAF8;TAF4B;PPARG;TRIP13;TAF5;RBMX;TAF3	GO_Biological_Process_2025
Module 5	Regulation of Microtubule Polymerization (GO:0031113)	12/53	3.26716	0.0166215	PSRC1;SLTM;HAUS8;STMN1;HAUS3;KIF21A;HAUS6;HAUS5;HAUS2;SKA1;CDK5RAP2;HAUS1	GO_Biological_Process_2025
Module 5	Import Into Nucleus (GO:0051170)	15/75	2.79291	0.0166215	IPO11;NUP107;NUP155;CSE1L;NUP93;IPO9;CDAN1;STK24;NUP85;NUP50;NUP62;FAM53C;NUP88;NUP98;KPNA2	GO_Biological_Process_2025
Module 5	DNA Repair-Dependent Chromatin Remodeling (GO:0140861)	7/21	5.57264	0.0166215	HDAC3;KAT5;PARP2;ZNF83;USP3;RNF8;USP51	GO_Biological_Process_2025
Module 5	Negative Regulation of Cilium Assembly (GO:1902018)	7/21	5.57264	0.0166215	TCHP;MPHOSPH9;ODF2L;TBC1D7;CCP110;KIF24;CEP97	GO_Biological_Process_2025
Module 5	Positive Regulation of Smoothened Signaling Pathway (GO:0045880)	7/21	5.57264	0.0166215	TEDC1;TEDC2;SFRP1;PDCL;ULK3;TUBD1;UCHL5	GO_Biological_Process_2025
Module 5	Protein Localization to Centrosome (GO:0071539)	7/21	5.57264	0.0166215	STIL;SPAG5;STK24;CCDC14;CEP83;CEP192;CEP78	GO_Biological_Process_2025
Module 5	Transcription Initiation at RNA Polymerase II Promoter (GO:0006367)	21/123	2.30321	0.0169333	SMARCD1;TBP;ATAD2;MED9;ASH2L;GTF2E1;MED6;MED29;MED7;ERCC3;VPS72;RBBP5;MED21;WDR5;TAF8;TAF4B;E2F2;TAF5;POLR2I;TAF3;PAAF1	GO_Biological_Process_2025
Module 5	H4/H2A Histone Acetyltransferase Complex (GO:0043189)	8/29	4.24678	0.0184006	ING3;MRGBP;KAT5;VPS72;MSL3B;ACTL6A;YEATS4;BRD8	GO_Cellular_Component_2025
Module 5	NuA4 Histone Acetyltransferase Complex (GO:0035267)	8/29	4.24678	0.0184006	ING3;MRGBP;KAT5;VPS72;MSL3B;ACTL6A;YEATS4;BRD8	GO_Cellular_Component_2025
Module 5	Fluoropyrimidine Activity WP1601	9/33	4.18229	0.0184944	DHFR;RRM1;RRM2;UCK1;XRCC3;DPYD;UPP1;TK1;TYMS	WikiPathways_2024_Human
Module 5	DNA Double-Strand Break Processing (GO:0000729)	6/16	6.68457	0.0187132	BLM;MRE11;RNF138;RBBP8;SMARCAD1;DNA2	GO_Biological_Process_2025
Module 5	Negative Regulation of mRNA Processing (GO:0050686)	6/16	6.68457	0.0187132	BARD1;SFSWAP;RNPS1;SRSF6;RBMX;SRSF10	GO_Biological_Process_2025
Module 5	SMC1 SMC3 Role In DNA Damage Cornelia De Lange Syndrome WP5118	5/11	9.28051	0.0190343	PAXIP1;MRE11;RAD21;BRCA1;RAD18	WikiPathways_2024_Human
Module 5	Interactome Of Polycomb Repressive Complex 2 PRC2 WP2916	6/16	6.68457	0.019519	SUZ12;RBBP4;EED;MTF2;RBBP7;EZH2	WikiPathways_2024_Human
Module 5	HIV Transcription Initiation	10/47	3.01396	0.0195694	TBP;ERCC3;POLR2B;TAF4B;POLR2H;TAF5;POLR2I;GTF2E1;TAF3;POLR2K	Reactome_Pathways_2024
Module 5	RNA Polymerase II HIV Promoter Escape	10/47	3.01396	0.0195694	TBP;ERCC3;POLR2B;TAF4B;POLR2H;TAF5;POLR2I;GTF2E1;TAF3;POLR2K	Reactome_Pathways_2024
Module 5	RNA Polymerase II Promoter Escape	10/47	3.01396	0.0195694	TBP;ERCC3;POLR2B;TAF4B;POLR2H;TAF5;POLR2I;GTF2E1;TAF3;POLR2K	Reactome_Pathways_2024
Module 5	RNA Polymerase II Transcription Initiation	10/47	3.01396	0.0195694	TBP;ERCC3;POLR2B;TAF4B;POLR2H;TAF5;POLR2I;GTF2E1;TAF3;POLR2K	Reactome_Pathways_2024
Module 5	RNA Polymerase II Transcription Initiation And Promoter Clearance	10/47	3.01396	0.0195694	TBP;ERCC3;POLR2B;TAF4B;POLR2H;TAF5;POLR2I;GTF2E1;TAF3;POLR2K	Reactome_Pathways_2024
Module 5	RNA Polymerase II Transcription Pre-Initiation And Promoter Opening	10/47	3.01396	0.0195694	TBP;ERCC3;POLR2B;TAF4B;POLR2H;TAF5;POLR2I;GTF2E1;TAF3;POLR2K	Reactome_Pathways_2024
Module 5	Aberrant Regulation of Mitotic Exit in Cancer Due to RB1 Defects	6/20	4.77365	0.0196068	RB1;FZR1;CDC23;UBE2C;UBE2S;ANAPC4	Reactome_Pathways_2024
Module 5	Conversion From APC C Cdc20 to APC C Cdh1 in Late Anaphase	6/20	4.77365	0.0196068	CDC20;FZR1;CDC23;UBE2C;UBE2S;ANAPC4	Reactome_Pathways_2024
Module 5	Response to UV (GO:0009411)	18/100	2.45386	0.0198267	SCARA3;FEN1;PCNA;PARP1;METTL3;AURKB;USF1;MAPK13;MSH6;MSH2;ERCC3;POLD1;PCLAF;USP1;ERCC5;DTL;MAP3K4;RHNO1	GO_Biological_Process_2025
Module 5	Positive Regulation of Attachment of Mitotic Spindle Microtubules to Kinetochore (GO:1902425)	4/7	14.8422	0.0198561	KAT5;INCENP;BIRC5;CDCA8	GO_Biological_Process_2025
Module 5	rRNA Base Methylation (GO:0070475)	4/7	14.8422	0.0198561	NSUN5;METTL16;METTL15;FDXACB1	GO_Biological_Process_2025
Module 5	Regulation of Mitotic Cytokinesis (GO:1902412)	4/7	14.8422	0.0198561	INCENP;BIRC5;CDCA8;AURKB	GO_Biological_Process_2025
Module 5	tRNA Surveillance (GO:0106354)	4/7	14.8422	0.0198561	EXOSC9;EXOSC8;EXOSC3;EXOSC2	GO_Biological_Process_2025
Module 5	Methylated Histone Binding (GO:0035064)	14/64	3.12786	0.0207985	SUZ12;SPIN4;UHRF1;CBX2;NCAPG2;CBX1;CXXC1;CHD1;MSH6;ING3;MTF2;WDR5;NCAPD3;PHF19	GO_Molecular_Function_2025
Module 5	Transcriptional Regulation by RUNX1	28/202	1.80083	0.0208314	SMARCD1;ITGA2B;ASH2L;CTSV;H2AC18;H2AC14;H2BC26;RBBP5;H2BC21;WDR5;H4C1;H2BC9;H2BC5;AUTS2;PCGF5;H2BC3;H2AC4;CBX2;ACTL6A;H2BC4;LMO2;H2BC17;H2BC13;H2BC14;H2BC15;GPAM;H2AC20;H2BC11	Reactome_Pathways_2024
Module 5	Diseases of Base Excision Repair	3/5	16.6883	0.0216325	NEIL3;NTHL1;MUTYH	Reactome_Pathways_2024
Module 5	Diseases of Mismatch Repair (MMR)	3/5	16.6883	0.0216325	MSH6;MSH2;MLH1	Reactome_Pathways_2024
Module 5	G2 Phase	3/5	16.6883	0.0216325	CCNA2;CDK2;E2F1	Reactome_Pathways_2024
Module 5	Telomere Maintenance via Telomere Lengthening (GO:0010833)	8/28	4.45937	0.0220248	DCLRE1B;PIF1;MRE11;RAD51;XRCC5;PTGES3;PINX1;WRAP53	GO_Biological_Process_2025
Module 5	Androgen Receptor Network In Prostate Cancer WP2263	19/109	2.36036	0.0223387	RB1;BARD1;SMARCD1;BLM;MRE11;PLK1;ACTL6A;BRCA1;CDC25A;CRKL;CDC25B;MSH6;MSH2;CHEK2;CHEK1;CDK2;CDK1;BCL2;E2F1	WikiPathways_2024_Human
Module 5	RNA Polymerase I Transcription Initiation	10/48	2.93448	0.022416	HDAC2;TBP;RBBP4;ERCC3;TAF1A;POLR1C;POLR2H;RBBP7;TTF1;POLR2K	Reactome_Pathways_2024
Module 5	RNA Polymerase III Transcription Initiation From Type 2 Promoter	7/27	3.89957	0.0228533	GTF3C3;TBP;GTF3C5;POLR1C;POLR3F;POLR2H;POLR2K	Reactome_Pathways_2024
Module 5	mRNA Decay by 5' to 3' Exoribonuclease	5/15	5.56709	0.0245682	LSM6;LSM5;LSM3;DCP2;LSM2	Reactome_Pathways_2024
Module 5	DNA Polymerase Binding (GO:0070182)	7/20	6.00164	0.0249365	FANCI;CDT1;PCNA;RAD51;FANCD2;PTGES3;HMGB1	GO_Molecular_Function_2025
Module 5	DNA Modification (GO:0006304)	6/17	6.07655	0.0260759	NEIL3;PARP1;PARP2;NTHL1;UNG;MUTYH	GO_Biological_Process_2025
Module 5	Methylation-Dependent Protein Binding (GO:0140034)	14/66	3.00723	0.0261789	SUZ12;SPIN4;UHRF1;CBX2;NCAPG2;CBX1;CXXC1;CHD1;MSH6;ING3;MTF2;WDR5;NCAPD3;PHF19	GO_Molecular_Function_2025
Module 5	Isotype Switching (GO:0045190)	5/12	7.95429	0.0273273	MSH6;SANBR;MSH2;RNF8;EXOSC3	GO_Biological_Process_2025
Module 5	Metabolism of Nucleotides	16/98	2.17854	0.0274049	DTYMK;DUT;RRM1;RRM2;GMPS;CTPS2;NUDT5;TYMS;DCK;UCK1;DPYD;NT5M;TK1;UPP1;NUDT15;GART	Reactome_Pathways_2024
Module 5	mRNA Splice Site Recognition (GO:0006376)	8/29	4.24678	0.0278664	SF3A3;PRPF39;SF3A2;SFSWAP;KHDC4;SRSF6;SRSF10;LUC7L2	GO_Biological_Process_2025
Module 5	MASTL Facilitates Mitotic Progression	4/10	7.4199	0.0279032	CCNB1;PPP2R2D;CDK1;MASTL	Reactome_Pathways_2024
Module 5	RNA Polymerase III Transcription Initiation From Type 1 Promoter	7/28	3.71368	0.0279815	GTF3C3;TBP;GTF3C5;POLR1C;POLR3F;POLR2H;POLR2K	Reactome_Pathways_2024
Module 5	Epigenetic Regulation of Gene Expression (GO:0040029)	13/64	2.8456	0.028391	SUV39H2;HDAC3;UHRF1;RNF8;BRCA1;CTCF;ALKBH4;ING3;CHEK1;MTF2;H3C7;EZH2;PHF19	GO_Biological_Process_2025
Module 5	Kleefstra Syndrome WP5351	8/29	4.24678	0.0286304	PAGR1;SMARCD1;PAXIP1;RBBP5;ACTL6A;WDR5;ASH2L;H3-3B	WikiPathways_2024_Human
Module 5	Negative Regulation of Plasma Membrane Bounded Cell Projection Assembly (GO:0120033)	9/36	3.71698	0.0310144	ARHGAP44;TCHP;ODF2L;MPHOSPH9;TBC1D7;TACSTD2;CCP110;KIF24;CEP97	GO_Biological_Process_2025
Module 5	MHC Class II Antigen Presentation	19/126	1.9835	0.0321054	CD74;KIF23;CTSV;KIF11;KIF22;TUBB4B;KIF15;DNM3;TUBA1C;KIF18A;RACGAP1;KIF2A;KIF4A;HLA-DPB1;KIF2C;KIF20A;HLA-DOB;TUBA8;HLA-DPA1	Reactome_Pathways_2024
Module 5	tRNA Modification in the Nucleus and Cytosol	9/43	2.95059	0.0321304	TRMT10A;ADAT1;TPRKB;TRMT13;CDKAL1;TRMT11;OSGEP;TRDMT1;ADAT2	Reactome_Pathways_2024
Module 5	pre-mRNA Binding (GO:0036002)	9/33	4.18229	0.0323637	HNRNPL;SLBP;PRPF39;ERI1;TRA2B;U2AF1;SRSF6;ZC3H14;RBM22	GO_Molecular_Function_2025
Module 5	mRNA Decay by 3' to 5' Exoribonuclease	5/16	5.06072	0.0327156	HBS1L;EXOSC9;EXOSC8;EXOSC3;EXOSC2	Reactome_Pathways_2024
Module 5	RNA Polymerase III Transcription Initiation	8/36	3.18387	0.0336652	GTF3C3;TBP;GTF3C5;SNAPC1;POLR1C;POLR3F;POLR2H;POLR2K	Reactome_Pathways_2024
Module 5	Nuclear-Transcribed mRNA Catabolic Process (GO:0000956)	16/89	2.44834	0.0346608	HBS1L;EIF4A3;PYM1;SMG9;MAGOHB;PNRC2;EXOSC10;CNOT7;ERI1;EXOSC9;EXOSC8;RNPS1;EXOSC3;EXOSC2;CNOT9;DCP2	GO_Biological_Process_2025
Module 5	Positive Regulation of Ubiquitin-Protein Transferase Activity (GO:0051443)	6/18	5.56987	0.0353723	CDC20;FZR1;UBE2C;UBE2S;PLK1;ZNF367	GO_Biological_Process_2025
Module 5	Co-Transcriptional mRNA 3'-End Processing, Cleavage and Polyadenylation Pathway (GO:0180010)	4/8	11.1311	0.0353723	NUDT21;CPSF7;CPSF6;PCF11	GO_Biological_Process_2025
Module 5	Regulation of Mitotic Centrosome Separation (GO:0046602)	4/8	11.1311	0.0353723	RANBP1;CHEK1;NEK2;KIF11	GO_Biological_Process_2025
Module 5	Regulation of Nuclear Cell Cycle DNA Replication (GO:0033262)	4/8	11.1311	0.0353723	TIPIN;DBF4;CDC7;DBF4B	GO_Biological_Process_2025
Module 5	Cilium Organization (GO:0044782)	32/230	1.8107	0.0356327	DYNC2I2;ARL6;FBF1;CCP110;PTPDC1;RPGR;AURKA;ARL13B;WDR90;TCTN2;TMEM107;POC1A;POC1B;RTTN;CFAP43;ZNF367;IFT56;CEP78;RAB8B;PLK4;IQCB1;NHERF1;ODF2;CCDC15;SCLT1;KIF24;FAM161A;KIAA0586;CEP83;HYLS1;CEP41;CEP89	GO_Biological_Process_2025
Module 5	RNA Splicing, via Transesterification Reactions (GO:0000375)	7/24	4.58849	0.0361857	SF3A3;PRPF4;DBR1;SNRNP40;PRPF3;TRA2B;SRSF10	GO_Biological_Process_2025
Module 5	Microtubule Polymerization (GO:0046785)	9/37	3.58404	0.0365878	NEDD1;TPX2;NDE1;TUBGCP5;TUBGCP3;TUBG1;CKAP5;HAUS2;HDGFL3	GO_Biological_Process_2025
Module 5	Nucleobase-Containing Compound Metabolic Process (GO:0006139)	9/37	3.58404	0.0365878	PRPS2;PRPSAP1;DUT;OAS3;TK1;UPP1;NUDT5;NUDT15;ATRIP	GO_Biological_Process_2025
Module 5	CDC42 GTPase Cycle	22/155	1.84847	0.0366306	PLEKHG3;RALBP1;ARHGEF26;STARD8;KCTD3;IQGAP3;ARHGAP44;DOCK10;ARHGAP33;GNA13;PREX1;ARHGAP32;DEPDC1B;DIAPH3;RACGAP1;WDR91;ECT2;PAK3;LBR;GIT1;TMPO;PAK4	Reactome_Pathways_2024
Module 5	Positive Regulation of Cell Division (GO:0051781)	10/44	3.28043	0.0369467	RACGAP1;CSPP1;KIF14;KIF23;PKN2;CDC6;ECT2;KIF20B;ZNF367;CDC25B	GO_Biological_Process_2025
Module 5	Oxidized DNA Binding (GO:0032356)	4/7	14.8422	0.0376827	MSH6;RECQL4;XRCC1;MUTYH	GO_Molecular_Function_2025
Module 5	Necroptosis	24/159	1.98886	0.0385141	H2AX;H2AZ1;H2AC8;PARP1;H2AC4;FAF1;TRAF2;HMGB1;H2AC16;H2AC17;H2AC18;H2AC11;H2AC12;MAPK9;H2AC13;H2AC14;H2AC20;CHMP1B;H2AC21;TNFSF10;BCL2;DNM1L;JAK2;JAK3	KEGG_2021_Human
Module 5	Mitochondrial DNA Metabolic Process (GO:0032042)	5/13	6.95962	0.0386674	MGME1;RRM1;PARP1;TOP3A;TWNK	GO_Biological_Process_2025
Module 5	Mitotic DNA Integrity Checkpoint Signaling (GO:0044774)	5/13	6.95962	0.0386674	CHEK2;DONSON;CLSPN;TOPBP1;TICRR	GO_Biological_Process_2025
Module 5	Nuclear RNA Surveillance (GO:0071027)	5/13	6.95962	0.0386674	EXOSC10;EXOSC9;EXOSC8;EXOSC3;EXOSC2	GO_Biological_Process_2025
Module 5	Sensing of DNA Double Strand Breaks	3/6	11.1249	0.039088	MRE11;KAT5;KPNA2	Reactome_Pathways_2024
Module 5	Telomere Extension By Telomerase	6/23	3.9306	0.039088	CCNA2;PIF1;ACD;CDK2;PPP6R3;WRAP53	Reactome_Pathways_2024
Module 5	Establishment of Sister Chromatid Cohesion	4/11	6.35957	0.0396381	STAG1;CDCA5;RAD21;ESCO2	Reactome_Pathways_2024
Module 5	Pyrimidine Salvage	4/11	6.35957	0.0396381	UCK1;TK1;UPP1;DCK	Reactome_Pathways_2024
Module 5	SLBP Dependent Processing of Replication-Dependent Histone Pre-mRNAs	4/11	6.35957	0.0396381	SLBP;ZNF473;SNRPE;SNRPB	Reactome_Pathways_2024
Module 5	SARS-CoV-2 Activates Modulates Innate and Adaptive Immune Responses	20/138	1.89328	0.0396828	NDC1;NUP205;NUP107;SEH1L;NUP155;NUP160;NUP93;NUP85;NUP42;NUP50;NUP62;NUP35;NUP88;NUP54;NUP43;NUP98;KPNA2;RAE1;NUP58;NUP37	Reactome_Pathways_2024
Module 5	Regulation of Centrosome Duplication (GO:0010824)	8/31	3.87708	0.0411459	GEN1;STIL;CHMP1B;CEP295;CCNF;XRCC3;SPICE1;CEP76	GO_Biological_Process_2025
Module 5	Regulation of Telomere Maintenance (GO:0032204)	11/52	2.99307	0.0411459	SLF1;MRE11;NSMCE4A;SLF2;NVL;XRCC5;ARTN;NEK2;MAPKAPK5;MAP3K4;AURKB	GO_Biological_Process_2025
Module 5	Signal Transduction by P53 Class Mediator (GO:0072331)	11/52	2.99307	0.0411459	RBM38;PIDD1;PAXIP1;TFAP4;KAT5;CRADD;CASP6;ARTN;FOXM1;GTSE1;E2F7	GO_Biological_Process_2025
Module 5	Cyclin-Dependent Protein Kinase Holoenzyme Complex (GO:0000307)	10/47	3.01396	0.0414928	CCNA2;CCNB2;CCNB1;CCNE2;CDK5;CCNF;CDK2;CDK1;CKS2;CKS1B	GO_Cellular_Component_2025
Module 5	Butyrate Response Factor 1 (BRF1) Binds and Destabilizes mRNA	5/17	4.63874	0.0418151	EXOSC9;EXOSC8;EXOSC3;EXOSC2;DCP2	Reactome_Pathways_2024
Module 5	KSRP (KHSRP) Binds and Destabilizes mRNA	5/17	4.63874	0.0418151	EXOSC9;EXOSC8;EXOSC3;EXOSC2;DCP2	Reactome_Pathways_2024
Module 5	Tristetraprolin (TTP, ZFP36) Binds and Destabilizes mRNA	5/17	4.63874	0.0418151	EXOSC9;EXOSC8;EXOSC3;EXOSC2;DCP2	Reactome_Pathways_2024
Module 5	APC C Cdh1 Mediated Degradation of Cdc20 and Other APC C Cdh1 Targets in Late Mitosis Early G1	11/61	2.45311	0.0430708	RB1;CDC20;FZR1;CDC23;PTTG1;UBE2C;UBE2S;PLK1;ANAPC4;AURKB;AURKA	Reactome_Pathways_2024
Module 5	APC Cdc20 Mediated Degradation of Cell Cycle Proteins Prior to Satisfation of the Checkpoint	11/61	2.45311	0.0430708	CDC20;CCNA2;CDC23;UBE2C;UBE2S;CDK1;BUB1B;ANAPC4;NEK2;BUB3;MAD2L1	Reactome_Pathways_2024
Module 5	Tumor Suppressor Activity Of SMARCB1 WP4204	8/31	3.87708	0.0441813	RB1;SUZ12;SMARCD1;RBBP4;EED;ACTL6A;H3-3B;EZH2	WikiPathways_2024_Human
Module 5	Maturation of 5.8S rRNA Frm Tricistronic rRNA Trnscpt (GO:0000466)	6/19	5.14113	0.0452989	EXOSC10;ERI1;EXOSC9;EXOSC8;EXOSC3;EXOSC2	GO_Biological_Process_2025
Module 5	Deuterosome (GO:0098536)	3/5	16.6883	0.0454275	PLK4;CEP152;SASS6	GO_Cellular_Component_2025
Module 5	RHOB GTPase Cycle	12/70	2.3074	0.0470689	PREX1;ANLN;ARHGAP32;DEPDC1B;DIAPH3;RACGAP1;PKN3;STARD8;PKN2;ECT2;IQGAP3;CIT	Reactome_Pathways_2024
Module 5	Endodeoxyribonuclease Activity, Producing 5'-Phosphomonoesters (GO:0016888)	5/12	7.95429	0.0504569	GEN1;FEN1;EXO1;DNA2;DNASE1L2	GO_Molecular_Function_2025
Module 5	Regulation of Cyclin-Dependent Protein Serine/Threonine Kinase Activity (GO:0000079)	10/46	3.09785	0.0505054	BLM;CDKN2C;PSRC1;TFAP4;CCNE2;CDC6;PKMYT1;CDC25C;CDC25A;CDKN3	GO_Biological_Process_2025
Module 5	Regulation of Protein Metabolic Process (GO:0051246)	16/93	2.32064	0.050772	UHRF1;FAF1;NANOS3;NOLC1;ELP4;ELP5;ELP6;PM20D2;TCOF1;CHEK2;WDR91;SPOPL;MAPKAPK5;SLC25A21;FAM83D;METAP1	GO_Biological_Process_2025
Module 5	Protein Localization to Nucleus (GO:0034504)	20/127	2.08917	0.050772	IPO11;NUP107;NUP155;CSE1L;PLK1;PINX1;LMNB2;LMNB1;NUP93;IPO9;STK24;NUP85;NUP50;NUP62;FAM53C;TAF8;NUP88;NUP98;KPNA2;TAF3	GO_Biological_Process_2025
Module 5	DNA Endonuclease Activity (GO:0004520)	7/23	4.87553	0.0511218	FEN1;MRE11;ASTE1;EXO1;RBBP8;ERCC5;DNA2	GO_Molecular_Function_2025
Module 5	rRNA Processing (GO:0006364)	18/110	2.18594	0.0515182	NVL;WDR74;NOL7;DDX10;NOLC1;RPF1;REXO5;RCL1;FBL;LSM6;EXOSC10;ERI1;EXOSC9;SRFBP1;RIOK1;EXOSC3;EXOSC2;MPHOSPH6	GO_Biological_Process_2025
Module 5	Meiotic Sister Chromatid Cohesion (GO:0051177)	5/14	6.18599	0.0534424	SGO2;STAG3;RAD21;BUB1B;PPP2R5D	GO_Biological_Process_2025
Module 5	Resolution of Meiotic Recombination Intermediates (GO:0000712)	5/14	6.18599	0.0534424	TOP2A;CENPX;FANCM;EME1;RMI1	GO_Biological_Process_2025
Module 5	Spliceosomal tri-snRNP Complex Assembly (GO:0000244)	5/14	6.18599	0.0534424	SART3;PRPF3;PRPF19;SRSF10;LSM2	GO_Biological_Process_2025
Module 5	Telomere Maintenance in Response to DNA Damage (GO:0043247)	5/14	6.18599	0.0534424	DCLRE1B;ARTN;SHLD3;SHLD2;CDK2	GO_Biological_Process_2025
Module 5	Positive Regulation of Transcription Initiation by RNA Polymerase II (GO:0060261)	11/54	2.85355	0.0538164	TBP;PAXIP1;MED21;TAF8;MED9;TAF4B;TAF5;TAF3;MED29;MED6;MED7	GO_Biological_Process_2025
Module 5	NOTCH2 Intracellular Domain Regulates Transcription	4/12	5.56432	0.0542999	HES1;RBPJ;MAMLD1;HES5	Reactome_Pathways_2024
Module 5	DNA Topological Change (GO:0006265)	4/9	8.90437	0.0544069	TOP2A;TOP3A;HMGB2;HMGB1	GO_Biological_Process_2025
Module 5	Microtubule Nucleation (GO:0007020)	7/26	4.10504	0.0545854	NEDD1;TPX2;NDE1;TUBGCP5;TUBGCP3;TUBG1;HAUS2	GO_Biological_Process_2025
Module 5	RHOJ GTPase Cycle	10/55	2.47706	0.0551122	PREX1;ARHGAP32;DEPDC1B;DIAPH3;ARL13B;PAK3;IQGAP3;GIT1;TMPO;PAK4	Reactome_Pathways_2024
Module 5	One carbon pool by folate	6/20	4.77365	0.0568099	DHFR;SHMT1;ST20-MTHFS;MTHFS;TYMS;GART	KEGG_2021_Human
Module 5	Nuclear Inclusion Body (GO:0042405)	4/10	7.4199	0.0578783	SLF1;PABPN1;NUP98;RAD18	GO_Cellular_Component_2025
Module 5	Nucleic Acid Catabolic Process (GO:0141188)	9/40	3.23666	0.0592867	ISG20;RNASEH2A;EXOSC10;PNPT1;EXOSC9;EXOSC8;EXOSC3;DNASE1L2;EXOSC2	GO_Biological_Process_2025
Module 5	protein-RNA Complex Assembly (GO:0022618)	21/138	2.00627	0.0594863	MCTS2;SF3A2;XRCC5;NVL;PTGES3;LIN9;PRPF19;USP39;COIL;GCFC2;SART3;GEMIN4;GEMIN6;SNRPE;SRFBP1;KHDC4;NAF1;SRSF6;SRSF10;LUC7L2;SNRPB	GO_Biological_Process_2025
Module 5	RNA Polymerase II Transcribes snRNA Genes	13/81	2.13222	0.0606251	TBP;GTF2E1;SNAPC1;PCF11;POLR2B;TAF8;RPRD1B;INTS7;POLR2H;TAF5;POLR2I;INTS9;POLR2K	Reactome_Pathways_2024
Module 5	Golgi-to-ER Retrograde Transport	19/135	1.82871	0.0612554	KIF23;KIF11;KIF22;TUBB4B;KIF15;TUBA1C;KIF18A;KIF18B;RACGAP1;KIF2A;KIF16B;KIFC1;KIF4A;KIF21A;KIF2C;KIF20A;KIF20B;PAFAH1B3;TUBA8	Reactome_Pathways_2024
Module 5	Glycine Degradation	3/7	8.34324	0.0612554	GCSH;GLDC;DLST	Reactome_Pathways_2024
Module 5	DYRK1A Involvement Regarding Cell Prolif In Brain Development WP5180	12/62	2.67776	0.0620071	APH1A;LIN54;RBL1;TFDP1;TFAP4;RBBP4;GMNN;HES1;LIN9;E2F4;HES5;LIN52	WikiPathways_2024_Human
Module 5	Spliceosomal Complex Assembly (GO:0000245)	12/63	2.62511	0.062035	SF3A3;GCFC2;SF3A2;PHF5A;SNRPE;KHDC4;PRPF19;USP39;SRSF6;SRSF10;LUC7L2;SNRPB	GO_Biological_Process_2025
Module 5	Double-Strand Break Repair via Synthesis-Dependent Strand Annealing (GO:0045003)	3/5	16.6883	0.062035	RAD51;XRCC3;RAD54L	GO_Biological_Process_2025
Module 5	mRNA 3'-End Processing by Stem-Loop Binding and Cleavage (GO:0006398)	3/5	16.6883	0.062035	SLBP;ZNF473;CPSF3	GO_Biological_Process_2025
Module 5	Maintenance of DNA Repeat Elements (GO:0043570)	3/5	16.6883	0.062035	MSH6;RMI2;MSH2	GO_Biological_Process_2025
Module 5	Metaphase/Anaphase Transition of Mitotic Cell Cycle (GO:0007091)	3/5	16.6883	0.062035	CDC23;PLK1;TACC3	GO_Biological_Process_2025
Module 5	Nucleobase Biosynthetic Process (GO:0046112)	3/5	16.6883	0.062035	SHMT1;GMPS;CTPS2	GO_Biological_Process_2025
Module 5	Nucleotide-Excision Repair, DNA Gap Filling (GO:0006297)	3/5	16.6883	0.062035	POLD3;POLD1;POLE	GO_Biological_Process_2025
Module 5	Positive Regulation of Nuclear Cell Cycle DNA Replication (GO:0010571)	3/5	16.6883	0.062035	DBF4;CDC7;DBF4B	GO_Biological_Process_2025
Module 5	5'-3' DNA Exonuclease Activity (GO:0035312)	4/8	11.1311	0.0626137	DCLRE1B;DCLRE1A;MGME1;EXO1	GO_Molecular_Function_2025
Module 5	mRNA Cleavage and Polyadenylation Specificity Factor Complex (GO:0005847)	6/22	4.17649	0.0641789	CPSF4;NUDT21;CPSF7;CPSF6;CPSF3;CSTF2	GO_Cellular_Component_2025
Module 5	Regulation of Kinase Activity (GO:0043549)	7/27	3.89957	0.0654642	RB1;CD74;NHERF1;RBL1;FIRRM;EMP2;ECT2	GO_Biological_Process_2025
Module 5	Regulation of Microtubule Polymerization or Depolymerization (GO:0031110)	7/27	3.89957	0.0654642	STMN1;STMN3;KIF21A;SKA3;SKA1;METAP1;SKA2	GO_Biological_Process_2025
Module 5	cullin-RING Ubiquitin Ligase Complex (GO:0031461)	29/219	1.70763	0.0654984	DMAC2;CCNF;CUL2;KLHL17;BUB1B;FBXO48;CKS1B;CDC20;DCAF15;AMN1;DCAF16;FZR1;CDC23;CCIN;ZSWIM5;ZYG11A;KLHL25;UBE2C;KLHL2;FBXO15;KLHL23;UBE2S;KBTBD2;CKS2;ANAPC4;SPOPL;DEPDC5;DTL;FBXL6	GO_Cellular_Component_2025
Module 5	RNA Polymerase I Transcription Termination	7/33	2.99869	0.065619	TBP;ERCC3;TAF1A;POLR1C;POLR2H;TTF1;POLR2K	Reactome_Pathways_2024
Module 5	DNA Replication Origin Binding (GO:0003688)	5/13	6.95962	0.0682584	ORC5;POLA1;ORC3;MCM10;CDC6	GO_Molecular_Function_2025
Module 5	RNA Polymerase III Abortive And Retractive Initiation	8/41	2.70073	0.0692206	GTF3C3;TBP;GTF3C5;SNAPC1;POLR1C;POLR3F;POLR2H;POLR2K	Reactome_Pathways_2024
Module 5	RNA Polymerase III Transcription	8/41	2.70073	0.0692206	GTF3C3;TBP;GTF3C5;SNAPC1;POLR1C;POLR3F;POLR2H;POLR2K	Reactome_Pathways_2024
Module 5	RHOC GTPase Cycle	12/74	2.15806	0.0698514	PREX1;ANLN;ARHGAP32;DEPDC1B;DIAPH3;RACGAP1;PKN3;PKN2;LBR;IQGAP3;TMPO;CIT	Reactome_Pathways_2024
Module 5	Mitotic Recombination (GO:0006312)	5/15	5.56709	0.0700792	GEN1;RAD51;MSH2;XRCC3;RAD54B	GO_Biological_Process_2025
Module 5	Negative Regulation of mRNA Splicing, via Spliceosome (GO:0048025)	5/15	5.56709	0.0700792	SFSWAP;RNPS1;SRSF6;RBMX;SRSF10	GO_Biological_Process_2025
Module 5	RNA-templated DNA Biosynthetic Process (GO:0006278)	6/21	4.45516	0.070252	PIF1;MRE11;XRCC5;PTGES3;PINX1;WRAP53	GO_Biological_Process_2025
Module 5	Anaphase-Promoting Complex-Dependent Catabolic Process (GO:0031145)	6/21	4.45516	0.070252	CDC20;FZR1;CDC23;UBE2C;UBE2S;ANAPC4	GO_Biological_Process_2025
Module 5	snRNA 3'-End Processing (GO:0034472)	6/21	4.45516	0.070252	TOE1;EXOSC9;EXOSC8;INTS7;EXOSC3;INTS9	GO_Biological_Process_2025
Module 5	Telomere Maintenance via Telomerase (GO:0007004)	6/21	4.45516	0.070252	PIF1;MRE11;XRCC5;PTGES3;PINX1;WRAP53	GO_Biological_Process_2025
Module 5	mRNA Catabolic Process (GO:0006402)	10/49	2.85908	0.0727039	EXOSC10;PNPT1;LSM6;EXOSC9;METTL16;EXOSC3;LSM5;EXOSC2;DCP2;LSM2	GO_Biological_Process_2025
Module 5	NURF Complex (GO:0016589)	3/6	11.1249	0.0729114	HMGXB4;RBBP4;RBBP7	GO_Cellular_Component_2025
Module 5	Astral Microtubule (GO:0000235)	3/6	11.1249	0.0729114	KIF18A;KIF18B;FAM161A	GO_Cellular_Component_2025
Module 5	MLL3/4 Complex (GO:0044666)	4/11	6.35957	0.0729114	PAGR1;PAXIP1;RBBP5;WDR5	GO_Cellular_Component_2025
Module 5	U2-type Catalytic Step 1 Spliceosome (GO:0071006)	4/11	6.35957	0.0729114	EIF4A3;MAGOHB;PRPF19;RBM22	GO_Cellular_Component_2025
Module 5	Signal Transduction	244/2613	1.16888	0.0735245	VPS29;NUP107;TAS2R20;CCP110;F11R;RBPJ;CRKL;H2AC18;CDC20;CRHBP;PREX1;RPS6KA5;FRAT2;H2AC14;KAT5;WDR91;RPS6KA1;STMN1;CHEK1;TNFSF10;H4C1;CEP97;TMPO;MED1;STARD8;PAQR3;KNL1;EREG;DEPDC1B;SFRP1;SPINT1;ULK3;NUP98;GRB7;SEH1L;CDCA8;VPS26A;LPAR4;IQGAP3;SKA1;SKA2;APH1A;DSN1;RACGAP1;NUP85;RAD21;RDH14;RCE1;ABCA1;PLK1;ZWINT;ANLN;PPP5C;STAG1;ARTN;HNRNPF;H2AC20;EZH2;RET;KIF14;ASH2L;OSBPL11;PCSK6;TUBA1C;XPO1;UCN2;N…	Reactome_Pathways_2024
Module 5	Negative Regulation of Cell Cycle (GO:0045786)	14/81	2.33206	0.075108	RB1;BARD1;BTG3;CDT1;NHERF1;SUV39H1;ANGEL2;GMNN;BRCA1;FBXO43;NUDT6;TFAP4;CREB3L4;MAD2L1	GO_Biological_Process_2025
Module 5	Gamma-Tubulin Binding (GO:0043015)	7/25	4.33333	0.0758675	NEDD1;RACGAP1;TUBGCP5;TUBGCP3;BRCA2;GIT1;CDK5RAP2	GO_Molecular_Function_2025
Module 5	DNA-directed DNA Polymerase Activity (GO:0003887)	6/19	5.14113	0.0758675	POLD3;POLA1;POLD1;POLE2;POLE3;POLE	GO_Molecular_Function_2025
Module 5	Exit From Mitosis (GO:0010458)	4/10	7.4199	0.0764295	EPS8;UBE2C;UBE2S;PPP2R2D	GO_Biological_Process_2025
Module 5	Formation of Extrachromosomal Circular DNA (GO:0001325)	4/10	7.4199	0.0764295	BLM;EXO1;XRCC3;DNA2	GO_Biological_Process_2025
Module 5	Mitotic DNA Replication Checkpoint Signaling (GO:0033314)	4/10	7.4199	0.0764295	DONSON;CLSPN;TOPBP1;TICRR	GO_Biological_Process_2025
Module 5	Response to X-ray (GO:0010165)	4/10	7.4199	0.0764295	BLM;MSH2;XRCC4;NUCKS1	GO_Biological_Process_2025
Module 5	Single Strand Break Repair (GO:0000012)	4/10	7.4199	0.0764295	NEIL3;TDP1;XRCC1;UNG	GO_Biological_Process_2025
Module 5	T-Circle Formation (GO:0090656)	4/10	7.4199	0.0764295	BLM;EXO1;XRCC3;DNA2	GO_Biological_Process_2025
Module 5	Telomere Maintenance via Telomere Trimming (GO:0090737)	4/10	7.4199	0.0764295	BLM;EXO1;XRCC3;DNA2	GO_Biological_Process_2025
Module 5	Positive Regulation of Mitotic Cell Cycle (GO:0045931)	7/28	3.71368	0.0766152	CCNB1;RPS6KB1;BIRC5;PKN2;TTL;AURKA;CDC25B	GO_Biological_Process_2025
Module 5	Regulation of Cellular Senescence (GO:2000772)	8/35	3.30197	0.0777477	FZR1;ARG2;ING3;PNPT1;RBL1;NEK4;CGAS;FBXO5	GO_Biological_Process_2025
Module 5	Establishment of Protein Localization to Organelle (GO:0072594)	15/90	2.2325	0.0777477	IPO11;NUP107;NUP155;CSE1L;NUP93;NEURL1B;IPO9;STK24;NUP85;NUP50;NUP62;FAM53C;NUP88;NUP98;KPNA2	GO_Biological_Process_2025
Module 5	Biomarkers For Pyrimidine Metabolism Disorders WP4584	5/15	5.56709	0.0795097	NT5C3A;RRM1;RRM2;DPYD;TYMS	WikiPathways_2024_Human
Module 5	Regulation of RNA Biosynthetic Process (GO:2001141)	54/465	1.47477	0.0796141	RB1;LIN54;SPIN4;NAB1;YEATS4;BRCA2;PQBP1;ING3;HMGN5;RPS6KA5;VPS72;ZNF280B;CHEK2;ZNF85;WDR5;ZNF724;ZNF488;ZNF486;ZNF682;ZNF680;ACTL6A;SAP30;ZNF90;TFDP1;ZNF718;ZNF519;THAP7;ZNF678;TESMIN;ZNF431;ZNF430;USP13;ZNF273;CXXC1;ZNF66;PKMYT1;BRIP1;RBBP4;NSD2;E2F1;E2F2;ZKSCAN5;RBBP7;SRSF10;KAT14;ZNF141;NR1D2;GRHL1;ACVR2B;SP3;ZNF257;ZNF730;EZH2;ZNF695	GO_Biological_Process_2025
Module 5	RNA Methylation (GO:0001510)	10/50	2.78745	0.080235	FBL;TRMT10A;METTL2A;METTL3;THUMPD2;TRMT13;SNRPE;LIN9;TRDMT1;SNRPB	GO_Biological_Process_2025
Module 5	Nuclear Export (GO:0051168)	10/50	2.78745	0.080235	ANKLE1;XPO1;DDX39A;UBE2I;NUP155;NUP42;CSE1L;NUP62;NUP98;CCHCR1	GO_Biological_Process_2025
Module 5	NOTCH4 Intracellular Domain Regulates Transcription	5/20	3.71038	0.0817537	NOTCH4;HES1;RBPJ;MAMLD1;HES5	Reactome_Pathways_2024
Module 5	Nuclease Activity (GO:0004518)	12/61	2.73255	0.0828201	ISG20;FEN1;PLSCR1;ANKLE1;MRE11;RNASEH2A;EXO1;NTHL1;ERCC5;DNA2;DNASE1L2;REXO5	GO_Molecular_Function_2025
Module 5	Protein K63-linked Ubiquitination (GO:0070534)	11/58	2.61012	0.0828482	TRAF3IP2;ARTN;UBE2S;UBE2T;PELI1;RNF8;BFAR;UBE2G1;PRPF19;RNF4;RNF5	GO_Biological_Process_2025
Module 5	Single-Stranded DNA Exodeoxyribonuclease Activity (GO:0008297)	4/9	8.90437	0.0836699	ISG20;MGME1;EXO1;POLE	GO_Molecular_Function_2025
Module 5	DNA Endonuclease Activity, Producing 3'-Phosphomonoesters (GO:0016889)	4/9	8.90437	0.0836699	GEN1;RAD51C;EME1;XRCC3	GO_Molecular_Function_2025
Module 5	Oxidized Purine DNA Binding (GO:0032357)	4/9	8.90437	0.0836699	MSH6;RECQL4;MSH2;MUTYH	GO_Molecular_Function_2025
Module 5	RHOQ GTPase Cycle	10/59	2.27435	0.0853645	PLEKHG3;ARHGAP33;PREX1;ARHGAP32;DEPDC1B;DIAPH3;ARL13B;IQGAP3;GIT1;PAK4	Reactome_Pathways_2024
Module 5	Negative Regulation of Organelle Assembly (GO:1902116)	9/43	2.95059	0.0864045	TCHP;ODF2L;MPHOSPH9;TBC1D7;CCP110;KIF24;BRCA1;CEP97;CDK5RAP2	GO_Biological_Process_2025
Module 5	RNA Methyltransferase Activity (GO:0008173)	6/20	4.77365	0.0864868	FBL;METTL3;THUMPD2;TRMT13;LIN9;TRDMT1	GO_Molecular_Function_2025
Module 5	5'-Flap Endonuclease Activity (GO:0017108)	3/5	16.6883	0.0914326	GEN1;FEN1;EXO1	GO_Molecular_Function_2025
Module 5	Mismatched DNA Binding (GO:0030983)	3/5	16.6883	0.0914326	MSH6;MSH2;MUTYH	GO_Molecular_Function_2025
Module 5	DNA-directed RNA Polymerase Activity (GO:0003899)	7/27	3.89957	0.0922245	POLR2B;PRIM1;MED21;POLR3F;POLR2H;POLR2I;POLR2K	GO_Molecular_Function_2025
Module 5	Protein Serine/Threonine/Tyrosine Kinase Activity (GO:0004712)	7/27	3.89957	0.0922245	MAP2K4;RPS6KB1;RPS6KA1;TTK;MAPKAPK5;AURKB;AURKA	GO_Molecular_Function_2025
Module 5	Golgi Cisternae Pericentriolar Stack Reorganization	4/14	4.45097	0.092851	CCNB2;CCNB1;PLK1;CDK1	Reactome_Pathways_2024
Module 5	Protein Serine/Threonine Kinase Activity (GO:0004674)	44/359	1.56648	0.092896	GSK3A;PKN3;MAST2;TTK;PKMYT1;AURKB;AURKA;MAPK9;RPS6KA5;CHEK2;CHEK1;RPS6KA1;GRK6;PBK;NEK2;PIM3;RIOK1;NEK3;PIM2;BUB1;MAP3K4;PAK4;PLK4;CDKL2;MAP3K3;NEK4;PLK1;CDC7;VRK1;HASPIN;MASTL;ACVR2B;MAPK13;MELK;CDK5;STK24;RPS6KB1;STK26;WNK3;CDK2;ULK3;CDK1;PKN2;MAPKAPK5	GO_Molecular_Function_2025
Module 5	RNA Splicing (GO:0008380)	15/92	2.17427	0.093141	SF3A3;TCERG1;DBR1;U2AF1;USP39;MAGOHB;PRPF4;SNRNP40;LSM6;PRPF3;TRA2B;RNPS1;SNRNP48;SRSF10;SNRPB	GO_Biological_Process_2025
Module 5	Positive Regulation of DNA-templated Transcription Initiation (GO:2000144)	11/59	2.55561	0.093141	TBP;PAXIP1;MED21;TAF8;MED9;TAF4B;TAF5;TAF3;MED29;MED6;MED7	GO_Biological_Process_2025
Module 5	Regulation of Transcription Initiation by RNA Polymerase II (GO:0060260)	11/59	2.55561	0.093141	TBP;PAXIP1;MED21;TAF8;MED9;TAF4B;TAF5;TAF3;MED29;MED6;MED7	GO_Biological_Process_2025
Module 5	Cdc20 Phospho-APC C Mediated Degradation of Cyclin A	10/60	2.22875	0.0945644	CDC20;CCNA2;CDC23;UBE2C;UBE2S;CDK1;BUB1B;ANAPC4;BUB3;MAD2L1	Reactome_Pathways_2024
Module 5	RNA Polymerase III Transcription Initiation From Type 3 Promoter	6/28	3.03645	0.095168	TBP;SNAPC1;POLR1C;POLR3F;POLR2H;POLR2K	Reactome_Pathways_2024
Module 5	DNA Polymerase Activity (GO:0034061)	6/21	4.45516	0.0962414	POLD3;POLA1;POLD1;POLE2;POLE3;POLE	GO_Molecular_Function_2025
Module 5	SUMO Ligase Complex (GO:0106068)	4/12	5.56432	0.097659	SLF1;NSMCE4A;SLF2;UBE2I	GO_Cellular_Component_2025
Module 5	Swr1 Complex (GO:0000812)	4/12	5.56432	0.097659	ING3;KAT5;ANP32E;BRD8	GO_Cellular_Component_2025
Module 5	16P11 2 Proximal Deletion Syndrome WP4949	13/74	2.37781	0.0976846	PCNA;HDAC3;PAXIP1;TRAF2;PPP2R5D;GDPD3;KIF22;TLCD3B;PAGR1;PPP4R1;HIRIP3;PPARG;CCT5	WikiPathways_2024_Human
Module 6	Regulation of Transcription by RNA Polymerase II (GO:0006357)	232/2250	1.54814	5.6974e-05	GABPB2;MYT1L;ZNF608;ZNF607;SOX18;ZNF606;CREB3L1;ZXDB;DPF2;FOXO3B;ZNF169;SOX4;ZNF18;NKX2-8;ZFP3;SLC11A1;EBF1;RFX3;ZNF10;SOX12;SFRP2;PRKAR1A;ATF6;TP53;ZNF276;ZNF397;ZNF154;CASZ1;EPAS1;TSHZ2;PIK3R1;ZBTB5;PRDM11;ZBTB3;PLAC8;ZNF709;PCBP3;ZNF704;HMOX1;ALX1;ZNF821;ZNF148;PATZ1;ZSCAN18;HEXIM2;NFE2;JUND;FOXF2;FZD4;IGF2;PBX2;NFATC1;ZNF34;NR2F6;SOX30;ID2;CREBRF;ATM;RCOR3;ZNF135;ZNF497;ZNF134;PHF2;RARG;MED19…	GO_Biological_Process_2025
Module 6	RNA Polymerase II Transcription Regulatory Region Sequence-Specific DNA Binding (GO:0000977)	138/1236	1.65957	0.000188414	ZNF571;ZBTB22;ZNF607;SOX18;FOXO3B;ZNF568;ZNF446;PITX2;PITX1;ZNF169;SOX4;ZNF18;NKX2-8;MSX2;ZFP3;EBF1;RFX3;ZNF10;SOX12;FOXP3;ZNF439;ZNF713;TBPL1;ZNF555;ATF6;TP53;ZNF554;ZNF397;ZNF671;ZNF154;CASZ1;ZNF790;MAX;EPAS1;MAZ;GLIS3;ZBTB5;PRDM11;FOXO1;NPAS3;ZNF709;ZFP57;ZNF704;ZKSCAN8;ZNF549;ZKSCAN3;E4F1;ZNF425;ALX1;ZNF821;ZNF148;PATZ1;ZNF664;ZNF784;ZNF662;ZSCAN18;NFE2;JUND;FOXF2;TFAP2E;PBX2;NFATC1;ZNF34;ESR…	GO_Molecular_Function_2025
Module 6	Regulation of DNA-templated Transcription (GO:0006355)	218/2139	1.51981	0.000213171	MYT1L;ZNF608;ZNF607;SOX18;ZNF606;CREB3L1;ZXDB;DPF2;FOXO3B;ZNF169;SOX4;ZNF18;NKX2-8;RBFOX2;MUSK;ZFP3;EBF1;RFX3;ZNF10;SFRP2;PRKAR1A;ZNF713;SPIN2A;ATF6;TP53;ZNF276;ZNF397;ZNF154;L3MBTL3;CASZ1;SET;EPAS1;TSHZ2;ZBTB5;PRDM11;ZBTB3;ZNF709;PCBP3;ZNF704;HMOX1;INPP5K;ALX1;ZNF821;ZNF148;PATZ1;OR7D2;ZSCAN18;HEXIM2;NFE2;PHC1;JUND;FOXF2;FZD4;IGF2;TRIP4;NFATC1;ZNF34;GDF6;SOX30;ID2;CREBRF;RCOR3;ZNF135;ZNF497;PHF2…	GO_Biological_Process_2025
Module 6	Cell Junction Assembly (GO:0034329)	23/101	3.79124	0.000919703	NLGN1;PCDHB14;PCDHB13;CDH8;AMOT;CDH6;SDK1;GJD3;PCDHB2;FLRT3;SLITRK1;TRPV4;CDH11;SLITRK6;PCDHB5;CDH13;PKP4;PLXNB1;MAPT;PCDHB9;PLXNA4;CDH18;SHANK2	GO_Biological_Process_2025
Module 6	Herpes simplex virus 1 infection	64/498	1.91409	0.00200932	ZNF571;TRADD;ZFP82;TNF;ZNF607;ZNF606;ZNF528;ZNF605;ZNF568;ZNF766;ZNF169;ZNF763;ZNF641;ZNF10;HLA-F;HLA-E;ZNF439;ZNF713;IRF7;ZNF514;ZNF875;ZNF599;ZNF555;ZNF554;TP53;IFNAR1;ZNF154;ZNF671;ZNF350;ZNF790;SRC;ZNF2;PIK3R1;ZNF7;ZNF709;ZFP57;NXF3;ZNF549;ZNF227;ZNF425;ZNF623;ZNF226;ZNF347;ZNF786;ZNF621;ZNF224;ZNF223;ZNF222;ZNF662;ZNF783;ZNF585A;ZNF221;STAT2;ZNF34;BST2;STING1;ZNF616;ZNF417;ZNF615;RBAK;ZNF135…	KEGG_2021_Human
Module 6	Collagen-Containing Extracellular Matrix (GO:0062023)	52/383	2.03325	0.0031956	VIT;COL16A1;COL14A1;COL12A1;HAPLN1;COMP;PPP3CA;ADAMTS3;ADAMTSL4;AIFM2;ADAMTS1;EMILIN2;FGFBP3;EDIL3;POSTN;ANXA4;ANXA5;DCN;VCAN;SFRP2;COL6A2;COL4A6;CDH13;VWA2;MXRA5;MATN4;ANGPTL1;MATN3;MATN2;FBN2;COLEC12;CD151;LAMA2;SDC2;COL11A1;SEMA3B;HTRA1;FBLN1;PRELP;NID1;FBLN2;NID2;COCH;VTN;CLEC3B;SERPINH1;SPOCK1;IGFBP7;PODN;COL3A1;FRAS1;COL9A2	GO_Cellular_Component_2025
Module 6	RNA Polymerase II Cis-Regulatory Region Sequence-Specific DNA Binding (GO:0000978)	113/1054	1.57021	0.00599053	ZNF571;ZBTB22;NR3C2;ZNF607;SOX18;CREB3L1;FOXO3B;ZNF568;ZNF446;PITX2;PITX1;SOX4;ZNF18;NKX2-8;EBF1;RFX3;SOX12;FOXP3;ZNF713;ATF6;TP53;ZNF397;ZNF671;ZNF154;ZNF790;MAX;MAZ;GLIS3;PRDM11;FOXO1;ZNF704;ZKSCAN8;ZNF549;ZKSCAN3;E4F1;ZNF821;ZNF148;PATZ1;ZNF664;ZNF784;ZNF662;ZSCAN18;NFE2;JUND;FOXF2;NFATC1;ZNF34;ESR1;NR2F6;SOX30;NR4A2;MAFB;ZNF417;ZNF135;ZNF497;ZNF134;RARG;CALCOCO1;ZFP82;MEOX2;SIX5;ZNF528;ZNF766…	GO_Molecular_Function_2025
Module 6	Cis-Regulatory Region Sequence-Specific DNA Binding (GO:0000987)	111/1035	1.56998	0.00599053	ZNF571;ZBTB22;ZNF607;SOX18;FOXO3B;ZNF568;ZNF446;PITX2;PITX1;SOX4;ZNF18;NKX2-8;EBF1;RFX3;SOX12;FOXP3;JMJD8;ZNF713;ATF6;TP53;ZNF397;ZNF671;ZNF154;ZNF790;MAZ;GLIS3;PRDM11;FOXO1;ZNF704;ZKSCAN8;ZNF549;ZKSCAN3;E4F1;ZNF821;ZNF148;PATZ1;ZNF664;ZNF784;ZNF662;ZSCAN18;NFE2;JUND;FOXF2;NFATC1;ZNF34;ESR1;NR2F6;SOX30;NR4A2;MAFB;ZNF417;ZNF135;ZNF497;ZNF134;RARG;CALCOCO1;ZFP82;MEOX2;SIX5;ZNF528;ZNF766;TEAD1;ZNF76…	GO_Molecular_Function_2025
Module 6	Axon guidance	29/182	2.43728	0.00830171	SEMA3C;SEMA3D;SRC;SEMA3B;PARD6G;PIK3R1;SEMA3F;EFNA5;ROBO1;NTN3;EFNB1;PPP3CA;DPYSL2;BOC;NCK2;FYN;LRIG2;NEO1;PLXNA4;EPHA5;NTNG2;TRPC6;SEMA6D;SEMA4G;BMP7;SSH3;FES;PLXNB1;RAF1	KEGG_2021_Human
Module 6	Axonogenesis (GO:0007409)	32/200	2.45243	0.0188317	SPTBN4;BRSK1;SEMA3C;SEMA3D;DOCK7;SEMA3B;SEMA3F;EFNA5;NTN3;EFNB1;KIF5C;SLITRK1;BOC;SLITRK6;TRIM46;FYN;APBB1;NEO1;SPG11;PLXNA4;EPHA5;LGI1;NTNG2;CNTN5;SEMA6D;SEMA4G;DCLK1;KIFC2;ADGRB1;ARHGEF7;LLGL1;B4GALT5	GO_Biological_Process_2025
Module 6	Positive Regulation of Cell Projection Organization (GO:0031346)	22/115	3.03691	0.0188317	NDRG4;LTK;FBXW8;FZD4;NTRK3;ZNF804A;NEDD9;PTK6;NDNF;PTN;CX3CL1;ROBO1;TIAM2;FES;PTK7;SLITRK1;DVL2;RAPGEF1;PLXNB1;APBB1;SCARF1;LLGL1	GO_Biological_Process_2025
Module 6	Calcium-Dependent Cell-Cell Adhesion via Plasma Membrane Cell Adhesion Molecules (GO:0016339)	11/40	4.8493	0.0534008	CDH6;NLGN1;PCDHB2;CDH11;PCDHB14;CDH13;PCDHB5;PCDHB13;PCDHB9;CDH8;CDH18	GO_Biological_Process_2025
Module 6	Synapse Organization (GO:0050808)	24/144	2.56739	0.0534008	NTNG2;NLGN1;MUSK;C5AR1;PCDHB14;PCDHB13;PSEN1;CX3CL1;CDH6;SDK1;PCDHB2;FLRT3;PTK7;SLITRK1;SLITRK6;PCDHB5;PLXNB1;MAPT;GPC4;ARHGEF7;PCDHB9;PDZRN3;PLXNA4;SHANK2	GO_Biological_Process_2025
Module 6	Cell Surface Receptor Protein Tyrosine Kinase Signaling Pathway (GO:0007169)	40/296	2.01341	0.0534008	FOXC1;LTK;FLT1;SRC;NEDD9;PIK3R1;EFNA5;FOXO1;GHR;EFNB1;FLRT2;FLRT3;PDGFD;BDKRB2;NCK2;FYN;ROS1;ANKS1B;EPHA5;PDGFRB;KL;MUSK;NTRK3;IGF2;PTK6;SORBS1;NGF;FRS3;VAV2;CNKSR1;CD4;AXL;DOK6;CD7;RAPGEF1;COL4A6;PKN1;ARHGEF7;FGFR4;ANGPTL1	GO_Biological_Process_2025
Module 6	Extracellular Matrix Organization (GO:0030198)	28/182	2.33619	0.0556261	VIT;COL16A1;COL14A1;COL11A1;COL12A1;NDNF;NID1;NID2;ADAMTS5;ADAMTS14;ADAMTS3;FLRT2;ADAMTS1;CREB3L1;SH3PXD2B;SERPINH1;FLOT1;CYP1B1;QSOX1;POSTN;MMP11;COL3A1;COL4A6;MMP19;COL9A2;MATN4;MATN3;MATN2	GO_Biological_Process_2025
Module 6	Enzyme-Linked Receptor Protein Signaling Pathway (GO:0007167)	21/121	2.69305	0.0613869	PDGFRB;LTK;FLT1;MUSK;NPR1;NTRK3;GUCA1B;NEDD9;PTK6;PTN;NGF;CNKSR1;CD4;AXL;DOK6;CD7;BDKRB2;RAPGEF1;FYN;ROS1;ANGPTL1	GO_Biological_Process_2025
Module 6	Cell-Cell Junction (GO:0005911)	40/316	1.86547	0.0701128	SPTBN4;CRB1;USP53;SRC;PARD6G;AQP3;CDH8;CNN3;CDH6;CYTH3;SDCBP;ARVCF;FLRT2;CCDC85B;MICALL2;FLOT1;CCN3;JAM3;CADM1;SORBS1;KLHL24;PARD3B;CNKSR1;RCAN1;VANGL2;GJD3;RAP2B;PTK7;TRPV4;ADGRB1;CDH11;CDH13;PKP4;DSG2;PKN1;PKP3;FGFR4;LLGL1;CDH18;LLGL2	GO_Cellular_Component_2025
Module 6	7 Oxo C And 7 Beta HC Pathways WP5064	10/27	5.6912	0.0709783	HSD11B2;ACOT8;AMACR;SCP2;ACOX2;NPC1;ACOT12;ACOT13;ACOT6;SLC27A2	WikiPathways_2024_Human
Module 6	Positive Regulation of Programmed Cell Death (GO:0043068)	34/248	2.04334	0.0928995	RARG;PRR7;TRADD;HTRA1;ITPR1;UBE2Z;TNF;FOXO1;IFIT2;PYCARD;CALHM2;SCIN;ADAMTSL4;AIFM2;ARL6IP5;CYP1B1;EMILIN2;APBB1;SOX4;HTATIP2;TNFRSF10C;PNMA2;GADD45G;CLIP3;BMP4;SFRP2;RYBP;LATS2;JMY;ATM;TAF6;ARHGEF7;ATF6;TP53	GO_Biological_Process_2025
Module 7	mRNA Splicing - Major Pathway	13/204	6.47258	0.000231009	RBM17;NKAP;UPF3B;CWC25;CWC27;CDC40;U2SURP;SMU1;SNW1;PPP1R8;ACIN1;DNAJC8;ZNF830	Reactome_Pathways_2024
Module 7	mRNA Splicing	13/215	6.11667	0.000231009	RBM17;NKAP;UPF3B;CWC25;CWC27;CDC40;U2SURP;SMU1;SNW1;PPP1R8;ACIN1;DNAJC8;ZNF830	Reactome_Pathways_2024
Module 7	Processing of Capped Intron-Containing Pre-mRNA	14/285	4.91657	0.000678487	RBM17;NKAP;UPF3B;CWC25;CWC27;CDC40;U2SURP;SMU1;NXF1;SNW1;PPP1R8;ACIN1;DNAJC8;ZNF830	Reactome_Pathways_2024
Module 7	Metabolism of RNA	22/761	2.87756	0.00521435	RBM17;TYW3;NKAP;UPF3B;GTF2H1;CWC25;GTF2H3;CWC27;PUS7;MTO1;CDC40;PATL1;U2SURP;GNL3;SMU1;NXF1;SNW1;XRN2;PPP1R8;ACIN1;DNAJC8;ZNF830	Reactome_Pathways_2024
Module 7	Herpes simplex virus 1 infection	17/498	3.37683	0.00574064	SP100;ZNF670;ZNF184;ZNF480;ZNF20;NXF1;C5;ZNF829;ZFP30;ZNF41;ZNF614;IL12A;TAB2;ZNF567;ZNF677;ZNF566;ZNF354B	KEGG_2021_Human
Module 7	Organelle Assembly (GO:0070925)	15/346	4.32069	0.00746006	BBS2;TSG101;UBXN2A;HPS3;IFT74;PCM1;TTC21B;CHMP2B;NEK1;CEP162;BBS7;CCDC66;ALPK1;CIBAR1;STAM2	GO_Biological_Process_2025
Module 7	SAGA-type Complex (GO:0070461)	5/39	13.57	0.00792784	ENY2;ZZZ3;MBIP;TAF9B;SUPT7L	GO_Cellular_Component_2025
Module 7	Intracellular Membrane-Bounded Organelle (GO:0043231)	85/5597	1.6421	0.0154374	UBXN2A;NKAP;PSIP1;CWC25;UFSP2;SMC6;SMC3;LARP1B;DUSP12;SENP7;RGS2;RGS3;CYP2D7;HEY1;ZFP30;RSRC1;SPATA24;NEK1;ACADM;KPNA5;ZNF644;ZNF566;EID2B;ZNF880;ZNF480;ACTR6;STARD9;ELAC1;DNTTIP1;PRP4K;MED4;PUS7;AP3B2;SUPT7L;GNL3;DNAJC2;XRN2;ZNF677;DNAJC8;ZNF830;STAM2;SP100;ZNF670;CUL1;ZNF22;MALT1;RELB;NXF1;WRN;PPP1R8;BNIP1;RBBP6;BRD7;BEND6;MBD4;TIA1;HELQ;ZNF184;TDRD9;UPF3B;LARP7;KRT10;GTF2H3;COQ7;U2SURP;NFKB2;S…	GO_Cellular_Component_2025
Module 7	Nucleus (GO:0005634)	76/4879	1.65737	0.0154374	UBXN2A;NKAP;PSIP1;CWC25;UFSP2;SMC6;SMC3;LARP1B;DUSP12;SENP7;RGS2;RGS3;HEY1;ZFP30;RSRC1;SPATA24;NEK1;ACADM;KPNA5;ZNF644;ZNF566;EID2B;ZNF880;ZNF480;ACTR6;STARD9;ELAC1;DNTTIP1;PRP4K;MED4;PUS7;SUPT7L;GNL3;DNAJC2;XRN2;ZNF677;DNAJC8;ZNF830;SP100;ZNF670;CUL1;ZNF22;MALT1;RELB;NXF1;WRN;PPP1R8;RBBP6;BRD7;BEND6;MBD4;TIA1;HELQ;ZNF184;TDRD9;UPF3B;LARP7;KRT10;GTF2H3;COQ7;U2SURP;NFKB2;SMU1;CENPE;SNW1;LYRM4;BRMS…	GO_Cellular_Component_2025
Module 7	Chromosome (GO:0005694)	8/179	4.34799	0.025388	CENPE;RSL1D1;WRN;DNTTIP1;NOL8;SMC6;SMC3;GNL3	GO_Cellular_Component_2025
Module 7	Nucleolus (GO:0005730)	19/805	2.29583	0.0334504	MBD4;SP100;TSG101;ACTR6;DNTTIP1;UPF3B;NOL8;PSIP1;TBCA;FBXL22;GNL3;RSL1D1;DNAJC2;MRPS9;WRN;ZZZ3;XRN2;MBIP;CUTC	GO_Cellular_Component_2025
Module 7	Nuclear Lumen (GO:0031981)	19/814	2.26877	0.0334504	MBD4;SP100;TSG101;ACTR6;DNTTIP1;UPF3B;NOL8;PSIP1;TBCA;FBXL22;GNL3;RSL1D1;DNAJC2;MRPS9;WRN;ZZZ3;XRN2;MBIP;CUTC	GO_Cellular_Component_2025
Module 7	U2-type Spliceosomal Complex (GO:0005684)	5/91	5.35074	0.0577824	SMU1;SNW1;CWC25;CWC27;CDC40	GO_Cellular_Component_2025
Module 7	Transcription Factor TFIIH Core Complex (GO:0000439)	2/9	26.0355	0.0633106	GTF2H1;GTF2H3	GO_Cellular_Component_2025
Module 7	DNA Repair Pathways Full Network WP4946	7/120	5.74704	0.0700853	MBD4;WRN;DCLRE1C;RFC1;REV1;GTF2H1;GTF2H3	WikiPathways_2024_Human
Module 7	miRNA Role In Immune Response In Sepsis WP4329	4/37	11.1335	0.0700853	TAB2;ICAM1;RELB;NFKB2	WikiPathways_2024_Human
Module 7	Genes Related To Primary Cilium Development Based On CRISPR WP4536	6/104	5.65766	0.0700853	BBS2;IFT74;TTC21B;CEP162;BBS7;CIBAR1	WikiPathways_2024_Human
Module 7	TRAPPIII Protein Complex (GO:1990072)	2/11	20.2478	0.0762716	TRAPPC8;TRAPPC13	GO_Cellular_Component_2025
Module 7	Transcription Factor TFIIH Holo Complex (GO:0005675)	2/11	20.2478	0.0762716	GTF2H1;GTF2H3	GO_Cellular_Component_2025
Module 7	Gene Expression (Transcription)	32/1615	1.96721	0.0788099	ZNF670;ZNF20;CUL1;CHM;PSIP1;GTF2E2;GRIN2A;WRN;HEY1;ZFP30;NAMPT;ZNF41;MBIP;ZNF567;BRD7;TAF9B;ZNF566;ZNF143;ZNF184;ZNF480;TDRD9;UPF3B;GTF2H1;MED4;GTF2H3;CDC40;GCK;ZZZ3;SNW1;ZNF614;ZNF677;ZNF354B	Reactome_Pathways_2024
Module 7	RNA Polymerase II Transcription	28/1360	2.03045	0.0788099	ZNF670;ZNF20;CUL1;CHM;GTF2E2;GRIN2A;WRN;HEY1;ZFP30;NAMPT;ZNF41;ZNF567;BRD7;TAF9B;ZNF566;ZNF143;ZNF184;ZNF480;UPF3B;GTF2H1;MED4;GTF2H3;CDC40;GCK;SNW1;ZNF614;ZNF677;ZNF354B	Reactome_Pathways_2024
Module 7	Membrane Trafficking	16/633	2.44808	0.0788099	SNAPIN;TSG101;CHM;TRAPPC8;CENPE;RINL;SNX2;CHMP2B;FCHO2;BNIP1;NAA35;TRAPPC13;VPS45;STAM2;TBC1D15;EXOC1	Reactome_Pathways_2024
Module 7	RNA Polymerase II HIV Promoter Escape	4/47	8.53997	0.0788099	GTF2H1;TAF9B;GTF2H3;GTF2E2	Reactome_Pathways_2024
Module 7	RNA Polymerase II Promoter Escape	4/47	8.53997	0.0788099	GTF2H1;TAF9B;GTF2H3;GTF2E2	Reactome_Pathways_2024
Module 7	RNA Polymerase II Transcription Initiation	4/47	8.53997	0.0788099	GTF2H1;TAF9B;GTF2H3;GTF2E2	Reactome_Pathways_2024
Module 7	RNA Polymerase II Transcription Initiation And Promoter Clearance	4/47	8.53997	0.0788099	GTF2H1;TAF9B;GTF2H3;GTF2E2	Reactome_Pathways_2024
Module 7	RNA Polymerase II Transcription Pre-Initiation And Promoter Opening	4/47	8.53997	0.0788099	GTF2H1;TAF9B;GTF2H3;GTF2E2	Reactome_Pathways_2024
Module 7	HIV Transcription Initiation	4/47	8.53997	0.0788099	GTF2H1;TAF9B;GTF2H3;GTF2E2	Reactome_Pathways_2024
Module 7	HIV Life Cycle	7/158	4.29245	0.0788099	TSG101;CHMP2B;PSIP1;GTF2H1;TAF9B;GTF2H3;GTF2E2	Reactome_Pathways_2024
Module 7	Cytoplasmic Side of Lysosomal Membrane (GO:0098574)	2/12	18.2221	0.0826083	SNAPIN;BORCS7	GO_Cellular_Component_2025
Module 7	ATAC Complex (GO:0140672)	2/13	16.5647	0.0886734	ZZZ3;MBIP	GO_Cellular_Component_2025
Module 7	Intracellular Membraneless Organelle (GO:0043232)	24/1310	1.77007	0.0886734	MBD4;SP100;TSG101;ACTR6;DNTTIP1;UPF3B;NOL8;PSIP1;KRT10;TBCA;SMC3;FBXL22;GNL3;CENPE;RSL1D1;DNAJC2;MRPS9;WRN;ZZZ3;XRN2;MBIP;ADAM8;CCDC66;CUTC	GO_Cellular_Component_2025
