# Supplementary material
Source: Research Square preprint supplement (doi:10.21203/rs.3.rs-9956001/v1)
Supplement: Supplementary file 12 [file fb0e7e563cdcc51bb88bb6a6.xlsx]

## Sheet: S10 Columns Description
Supplementary Table S10: Column Description
Column Name	Description
Probe_ID	Probe IDs from Illumina EPIC array used in the Pai et al dataset (note: this is distinct from EPICv2 used in the ONS dataset).
Gene_Name	Gene symbol taken from Gencode version 47 gene annotation corresponding to the gene expression feature included in the Pearson correlation analysis.
Pearson_R	Pearson's correlation coefficient between DNA methylation and gene expression across samples.
P_value	P-value for the methylation–expression correlation analysis.

## Sheet: S10 - Pai et.al. PCorr
Supplementary Table S10: Pearson's Correlation in Pai et.al Data, Using Correlated Probes in Adolescent ONS Dataset
Probe_ID	Gene_Name	Pearson_R	P_value
cg06971096	PTPRN	-0.637349	0.000808826
cg03545227	PTPRN	-0.507032	0.0114472
cg02767663	LAMC2	-0.494337	0.0140707
cg12552165	LAMC2	-0.493286	0.0143084
cg08267319	SIRT7	-0.4673	0.0213135
cg23696949	LAMC2	-0.405362	0.0493972
cg00696930	LAMC2	-0.320392	0.126919
cg03000006	MYRIP	-0.30355	0.149308
cg01949993	LAMC2	-0.250041	0.238642
cg20176194	PTPRN	0.23667	0.265513
cg14281592	ANGPTL2	-0.198376	0.352764
cg07544232	LAMC2	-0.166689	0.436284
cg24049326	SIRT7	0.148453	0.488752
cg05193613	ANGPTL2	0.141032	0.51097
cg06978680	STEAP2	-0.131345	0.540694
cg25516529	PTPRN	0.0998418	0.642523
cg16293131	SIRT7	0.0888673	0.679653
cg07921818	RAB40B	0.0705371	0.743274
cg20671534	PTPRN	0.043321	0.840704
cg01460604	LRRC17	-0.0137574	0.949128
